# Supplementary material for: Construction of an Exudative Age-Related Macular Degeneration Diagnostic and Therapeutic Molecular Network Using Multi-Layer Network Analysis, a Fuzzy Logic Model, and Deep Learning Techniques: Are Retinal and Brain Neurodegenerative Disorders Related?
Source: MDPI journal article supplement (doi:10.3390/ph16111555), 2023-11-02
Supplement: s1 [file s1]

| <b>Supplementary Table S1: the first list of genes involved in nAMD pathogenesis were identified from the MuST and DIAMOnD algorithms</b> |                                                           |
|-------------------------------------------------------------------------------------------------------------------------------------------|-----------------------------------------------------------|
| ABCA4                                                                                                                                     | ATP binding cassette subfamily A member 4                 |
| VEGFA                                                                                                                                     | vascular endothelial growth factor A                      |
| RAB1A                                                                                                                                     | RAB1A, member RAS oncogene family                         |
| TNFRSF10A                                                                                                                                 | tumor necrosis factor receptor superfamily member 10a     |
| ERCC6                                                                                                                                     | ERCC excision repair 6, chromatin remodeling factor       |
| C1QTNF5                                                                                                                                   | C1q and tumor necrosis factor related protein 5           |
| MYC                                                                                                                                       | v-myc avian myelocytomatosis viral oncogene homolog       |
| NEFM                                                                                                                                      | neurofilament, medium polypeptide                         |
| C9                                                                                                                                        | complement component 9                                    |
| IRAK1                                                                                                                                     | interleukin 1 receptor associated kinase 1                |
| C2                                                                                                                                        | complement component 2                                    |
| C3                                                                                                                                        | complement component 3                                    |
| NPM1                                                                                                                                      | nucleophosmin (nucleolar phosphoprotein B23, numatrin)    |
| TLR4                                                                                                                                      | toll like receptor 4                                      |
| SLC16A8                                                                                                                                   | solute carrier family 16 member 8                         |
| HIF1A                                                                                                                                     | hypoxia inducible factor 1 alpha subunit                  |
| TIMP3                                                                                                                                     | TIMP metalloproteinase inhibitor 3                        |
| IQCB1                                                                                                                                     | IQ motif containing B1                                    |
| UBA52                                                                                                                                     | ubiquitin A-52 residue ribosomal protein fusion product 1 |
| RPGR                                                                                                                                      | retinitis pigmentosa GTPase regulator                     |
| VWCE                                                                                                                                      | von Willebrand factor C and EGF domains                   |
| CFH                                                                                                                                       | complement factor H                                       |
| NMNAT1                                                                                                                                    | nicotinamide nucleotide adenyltransferase 1               |
| TGM2                                                                                                                                      | transglutaminase 2                                        |
| CFI                                                                                                                                       | complement factor I                                       |
| APOE                                                                                                                                      | apolipoprotein E                                          |
| COPS6                                                                                                                                     | COP9 signalosome subunit 6                                |
| SQSTM1                                                                                                                                    | sequestosome 1                                            |
| SLC2A4                                                                                                                                    | solute carrier family 2 member 4                          |
| CFB                                                                                                                                       | complement factor B                                       |
| KDM5B                                                                                                                                     | lysine demethylase 5B                                     |
| LTBP1                                                                                                                                     | latent transforming growth factor beta binding protein 1  |
| SERPINA1                                                                                                                                  | serpin family A member 1                                  |
| CD46                                                                                                                                      | CD46 molecule                                             |
| VCAN                                                                                                                                      | versican                                                  |
| ANTXR2                                                                                                                                    | anthrax toxin receptor 2                                  |
| SNX27                                                                                                                                     | sorting nexin family member 27                            |
| APP                                                                                                                                       | amyloid beta precursor protein                            |
| P3H3                                                                                                                                      | prolyl 3-hydroxylase 3                                    |
| KLK3                                                                                                                                      | kallikrein related peptidase 3                            |

|             |                                                           |
|-------------|-----------------------------------------------------------|
| LAMA1       | laminin subunit alpha 1                                   |
| ADAMTS1     | ADAM metalloproteinase with thrombospondin type 1 motif 1 |
| SERPINA3    | serpin family A member 3                                  |
| VWF         | von Willebrand factor                                     |
| PDGFA       | platelet derived growth factor subunit A                  |
| PDGFB       | platelet derived growth factor subunit B                  |
| CST3        | cystatin C                                                |
| SERPINE2    | serpin family E member 2                                  |
| A2M         | alpha-2-macroglobulin                                     |
| PXN         | paxillin                                                  |
| VTN         | vitronectin                                               |
| SERPINB6    | serpin family B member 6                                  |
| CX3CL1      | C-X3-C motif chemokine ligand 1                           |
| CPB2        | carboxypeptidase B2                                       |
| COL18A1     | collagen type XVIII alpha 1 chain                         |
| CP          | ceruloplasmin                                             |
| AMBP        | alpha-1-microglobulin/bikunin precursor                   |
| FBN2        | fibrillin 2                                               |
| FBN1        | fibrillin 1                                               |
| CALR        | calreticulin                                              |
| SERPINE1    | serpin family E member 1                                  |
| CXCL12      | C-X-C motif chemokine ligand 12                           |
| ITGA2       | integrin subunit alpha 2                                  |
| FCN2        | ficolin 2                                                 |
| CTGF (CCN2) | connective tissue growth factor                           |
| FN1         | fibronectin 1                                             |
| DPT         | dermatopontin                                             |
| CD36        | CD36 molecule                                             |
| FCN1        | ficolin 1                                                 |
| ACHE        | acetylcholinesterase (Cartwright blood group)             |
| MAG         | myelin associated glycoprotein                            |
| ITGAM       | integrin subunit alpha M                                  |
| DEFA1B      | defensin alpha 1B                                         |
| COLGALT2    | collagen beta(1-O)galactosyltransferase 2                 |
| CR1         | complement component 3b/4b receptor 1 (Knops blood group) |
| SERPING1    | serpin family G member 1                                  |
| C1QA        | complement component 1, q subcomponent, A chain           |
| ITGA2B      | integrin subunit alpha 2b                                 |
| C1QB        | complement component 1, q subcomponent, B chain           |
| IGLL5       | immunoglobulin lambda like polypeptide 5                  |
| C1QC        | complement component 1, q subcomponent, C chain           |

|         |                                                            |
|---------|------------------------------------------------------------|
| C1R     | complement C1r subcomponent                                |
| DDX19B  | DEAD-box helicase 19B                                      |
| C1S     | complement component 1, s subcomponent                     |
| ITGA5   | integrin subunit alpha 5                                   |
| COL14A1 | collagen type XIV alpha 1 chain                            |
| PF4     | platelet factor 4                                          |
| ITGB3   | integrin subunit beta 3                                    |
| CFP     | complement factor properdin                                |
| SAA1    | serum amyloid A1                                           |
| FGA     | fibrinogen alpha chain                                     |
| C1QTNF2 | C1q and tumor necrosis factor related protein 2            |
| TNFAIP6 | TNF alpha induced protein 6                                |
| KLK13   | kallikrein related peptidase 13                            |
| MASP2   | mannan binding lectin serine peptidase 2                   |
| CD44    | CD44 molecule (Indian blood group)                         |
| C4A     | complement component 4A (Rodgers blood group)              |
| C4B     | complement component 4B (Chido blood group)                |
| C4BPA   | complement component 4 binding protein alpha               |
| MYOC    | myocilin                                                   |
| ITGAV   | integrin subunit alpha V                                   |
| PROC    | protein C, inactivator of coagulation factors Va and VIIIa |
| ITGB1   | integrin subunit beta 1                                    |
| C5      | complement component 5                                     |
| PROS1   | protein S (alpha)                                          |
| TFAP2C  | transcription factor AP-2 gamma                            |
| COL4A4  | collagen type IV alpha 4 chain                             |
| COL4A3  | collagen type IV alpha 3 chain                             |
| COL4A2  | collagen type IV alpha 2                                   |
| FGF7    | fibroblast growth factor 7                                 |
| COL4A1  | collagen type IV alpha 1 chain                             |
| COL3A1  | collagen type III alpha 1 chain                            |
| COL2A1  | collagen type II alpha 1 chain                             |
| HSPG2   | heparan sulfate proteoglycan 2                             |
| ELN     | elastin                                                    |
| FGF2    | fibroblast growth factor 2                                 |
| COL1A2  | collagen type I alpha 2 chain                              |
| COL1A1  | collagen type I alpha 1                                    |
| FGB     | fibrinogen beta chain                                      |
| TF      | transferrin                                                |
| TFPI    | tissue factor pathway inhibitor                            |
| TTR     | transthyretin                                              |

|        |                                                     |
|--------|-----------------------------------------------------|
| KLK6   | kallikrein related peptidase 6                      |
| COL9A1 | collagen type IX alpha 1                            |
| COL8A2 | collagen type VIII alpha 2                          |
| COL7A1 | collagen type VII alpha 1                           |
| COL6A2 | collagen type VI alpha 2                            |
| COL6A1 | collagen type VI alpha 1                            |
| COL5A1 | collagen type V alpha 1                             |
| COL4A6 | collagen type IV alpha 6 chain                      |
| COL4A5 | collagen type IV alpha 5 chain                      |
| LAMA3  | laminin subunit alpha 3                             |
| MMP1   | matrix metalloproteinase 1                          |
| MMP2   | matrix metalloproteinase 2                          |
| MMP3   | matrix metalloproteinase 3                          |
| MMP7   | matrix metalloproteinase 7                          |
| MASP1  | mannan binding lectin serine peptidase 1            |
| MMP9   | matrix metalloproteinase 9                          |
| MMP10  | matrix metalloproteinase 10                         |
| TGFB1  | transforming growth factor beta induced             |
| DDX31  | DEAD-box helicase 31                                |
| IGFBP3 | insulin like growth factor binding protein 3        |
| IGFBP2 | insulin like growth factor binding protein 2        |
| IGFBP1 | insulin like growth factor binding protein 1        |
| F5     | coagulation factor V                                |
| HP     | haptoglobin                                         |
| TGFB1  | transforming growth factor beta 1                   |
| IGF2   | insulin like growth factor 2                        |
| AHSG   | alpha 2-HS glycoprotein                             |
| LAMC1  | laminin subunit gamma 1                             |
| F2     | coagulation factor II, thrombin                     |
| BGN    | biglycan                                            |
| FGG    | fibrinogen gamma chain                              |
| LAMA5  | laminin subunit alpha 5                             |
| LAMB1  | laminin subunit beta 1                              |
| THBS1  | thrombospondin 1                                    |
| THBD   | thrombomodulin                                      |
| PTPRK  | protein tyrosine phosphatase, receptor type K       |
| F13A1  | coagulation factor XIII A chain                     |
| VKORC1 | vitamin K epoxide reductase complex subunit 1       |
| F11    | coagulation factor XI                               |
| MIS12  | MIS12, kinetochore complex component                |
| C4B_2  | complement component 4B (Chido blood group), copy 2 |

|          |                                                                                             |
|----------|---------------------------------------------------------------------------------------------|
| F10      | coagulation factor X                                                                        |
| IGFBP5   | insulin like growth factor binding protein 5                                                |
| F8       | coagulation factor VIII                                                                     |
| CA8      | carbonic anhydrase 8                                                                        |
| CD93     | CD93 molecule                                                                               |
| BMP1     | bone morphogenetic protein 1                                                                |
| PRELP    | proline and arginine rich end leucine rich repeat protein                                   |
| PITX3    | paired like homeodomain 3                                                                   |
| CTRB1    | chymotrypsinogen B1                                                                         |
| GDPD1    | glycerophosphodiester phosphodiesterase domain containing 1                                 |
| PLA2G2A  | phospholipase A2 group IIA                                                                  |
| HPX      | hemopexin                                                                                   |
| CTSL     | cathepsin L                                                                                 |
| DCN      | decorin                                                                                     |
| KLK1     | kallikrein 1                                                                                |
| CTSG     | cathepsin G                                                                                 |
| KLK2     | kallikrein related peptidase 2                                                              |
| ELANE    | elastase, neutrophil expressed                                                              |
| MEP1A    | meprin A subunit alpha                                                                      |
| LCAT     | lecithin-cholesterol acyltransferase                                                        |
| TIMP1    | TIMP metallopeptidase inhibitor 1                                                           |
| ZNF558   | zinc finger protein 558                                                                     |
| HRG      | histidine rich glycoprotein                                                                 |
| HAPLN1   | hyaluronan and proteoglycan link protein 1                                                  |
| KNG1     | kininogen 1                                                                                 |
| CRP      | C-reactive protein, pentraxin-related                                                       |
| HABP2    | hyaluronan binding protein 2                                                                |
| MFAP2    | microfibrillar associated protein 2                                                         |
| PLAT     | plasminogen activator, tissue type                                                          |
| PLAU     | plasminogen activator, urokinase                                                            |
| ECE1     | endothelin converting enzyme 1                                                              |
| PLG      | plasminogen                                                                                 |
| SERPINF2 | serpin family F member 2                                                                    |
| FBLN2    | fibulin 2                                                                                   |
| COLQ     | collagen-like tail subunit (single strand of homotrimer) of asymmetric acetylcholinesterase |
| NID2     | nidogen 2                                                                                   |
| FBLN1    | fibulin 1                                                                                   |
| LGALS3   | galectin 3                                                                                  |
| FAM20C   | family with sequence similarity 20 member C                                                 |
| PLOD1    | procollagen-lysine,2-oxoglutarate 5-dioxygenase 1                                           |
| MAPK6    | mitogen-activated protein kinase 6                                                          |

|          |                                                 |
|----------|-------------------------------------------------|
| SERPIND1 | serpin family D member 1                        |
| BCAN     | brevican                                        |
| DEFA1    | defensin alpha 1                                |
| APCS     | amyloid P component, serum                      |
| SPARC    | secreted protein acidic and cysteine rich       |
| SERPINA5 | serpin family A member 5                        |
| LOX      | lysyl oxidase                                   |
| NID1     | nidogen 1                                       |
| LGALS8   | galectin 8                                      |
| LGALS9   | galectin 9                                      |
| MBL2     | mannose binding lectin 2                        |
| SPP1     | secreted phosphoprotein 1                       |
| LRP1     | LDL receptor related protein 1                  |
| ORM1     | orosomucoid 1                                   |
| C1QTNF9  | C1q and tumor necrosis factor related protein 9 |
| ALB      | albumin                                         |
| APOA1    | apolipoprotein A1                               |
| COLEC12  | collectin subfamily member 12                   |
| APOA2    | apolipoprotein A2                               |
| ALDH2    | aldehyde dehydrogenase 2 family (mitochondrial) |
| MATN2    | matrilin 2                                      |
| PCOLCE   | procollagen C-endopeptidase enhancer            |
| APOC1    | apolipoprotein C1                               |
| SERPINC1 | serpin family C member 1                        |
| PTX3     | pentraxin 3                                     |
| OSM      | oncostatin M                                    |

| <b>Supplementary Table S2: the second list of genes involved in nAMD disease were identified from the the valid databases</b> |                                                                                           |
|-------------------------------------------------------------------------------------------------------------------------------|-------------------------------------------------------------------------------------------|
| VEGFA                                                                                                                         | vascular endothelial growth factor A [Source:HGNC Symbol;Acc:HGNC:12680]                  |
| CFB                                                                                                                           | complement factor B [Source:HGNC Symbol;Acc:HGNC:1037]                                    |
| C3                                                                                                                            | complement component 3 [Source:HGNC Symbol;Acc:HGNC:1318]                                 |
| ARMS2                                                                                                                         | age-related maculopathy susceptibility 2 [Source:HGNC Symbol;Acc:HGNC:32685]              |
| C2                                                                                                                            | complement component 2 [Source:HGNC Symbol;Acc:HGNC:1248]                                 |
| CFHR1                                                                                                                         | complement factor H related 1 [Source:HGNC Symbol;Acc:HGNC:4888]                          |
| APOE                                                                                                                          | apolipoprotein E [Source:HGNC Symbol;Acc:HGNC:613]                                        |
| HTRA1                                                                                                                         | HtrA serine peptidase 1 [Source:HGNC Symbol;Acc:HGNC:9476]                                |
| CFI                                                                                                                           | complement factor I [Source:HGNC Symbol;Acc:HGNC:5394]                                    |
| CFH                                                                                                                           | complement factor H [Source:HGNC Symbol;Acc:HGNC:4883]                                    |
| TIMP3                                                                                                                         | TIMP metalloproteinase inhibitor 3 [Source:HGNC Symbol;Acc:HGNC:11822]                    |
| HMCN1                                                                                                                         | hemicentin 1 [Source:HGNC Symbol;Acc:HGNC:19194]                                          |
| CFHR3                                                                                                                         | complement factor H related 3 [Source:HGNC Symbol;Acc:HGNC:16980]                         |
| RPGR                                                                                                                          | retinitis pigmentosa GTPase regulator [Source:HGNC Symbol;Acc:HGNC:10295]                 |
| C9                                                                                                                            | complement component 9 [Source:HGNC Symbol;Acc:HGNC:1358]                                 |
| CFHR4                                                                                                                         | complement factor H related 4 [Source:HGNC Symbol;Acc:HGNC:16979]                         |
| SLC16A8                                                                                                                       | solute carrier family 16 member 8 [Source:HGNC Symbol;Acc:HGNC:16270]                     |
| CFHR2                                                                                                                         | complement factor H related 2 [Source:HGNC Symbol;Acc:HGNC:4890]                          |
| RLBP1                                                                                                                         | retinaldehyde binding protein 1 [Source:HGNC Symbol;Acc:HGNC:10024]                       |
| RAX2                                                                                                                          | retina and anterior neural fold homeobox 2 [Source:HGNC Symbol;Acc:HGNC:18286]            |
| C1QTNF5                                                                                                                       | C1q and tumor necrosis factor related protein 5 [Source:HGNC Symbol;Acc:HGNC:14344]       |
| TLR4                                                                                                                          | toll like receptor 4 [Source:HGNC Symbol;Acc:HGNC:11850]                                  |
| FBLN5                                                                                                                         | fibulin 5 [Source:HGNC Symbol;Acc:HGNC:3602]                                              |
| SQSTM1                                                                                                                        | sequestosome 1 [Source:HGNC Symbol;Acc:HGNC:11280]                                        |
| ERCC6                                                                                                                         | ERCC excision repair 6, chromatin remodeling factor [Source:HGNC Symbol;Acc:HGNC:3438]    |
| TNFRSF10A                                                                                                                     | tumor necrosis factor receptor superfamily member 10a [Source:HGNC Symbol;Acc:HGNC:11904] |
| PARP12                                                                                                                        | poly(ADP-ribose) polymerase family member 12 [Source:HGNC Symbol;Acc:HGNC:21919]          |
| NMNAT1                                                                                                                        | nicotinamide nucleotide adenylyltransferase 1 [Source:HGNC Symbol;Acc:HGNC:17877]         |
| HIC1                                                                                                                          | hypermethylated in cancer 1 [Source:HGNC Symbol;Acc:HGNC:4909]                            |
| CCR2                                                                                                                          | C-C motif chemokine receptor 2 [Source:HGNC Symbol;Acc:HGNC:1603]                         |
| CD46                                                                                                                          | CD46 molecule [Source:HGNC Symbol;Acc:HGNC:6953]                                          |
| MDM1                                                                                                                          | Mdm1 nuclear protein [Source:HGNC Symbol;Acc:HGNC:29917]                                  |
| ABCA1                                                                                                                         | ATP binding cassette subfamily A member 1 [Source:HGNC Symbol;Acc:HGNC:29]                |
| LIPC                                                                                                                          | lipase C, hepatic type [Source:HGNC Symbol;Acc:HGNC:6619]                                 |
| CCL13                                                                                                                         | C-C motif chemokine ligand 13 [Source:HGNC Symbol;Acc:HGNC:10611]                         |
| CETP                                                                                                                          | cholesteryl ester transfer protein [Source:HGNC Symbol;Acc:HGNC:1869]                     |
| PLEKHA1                                                                                                                       | pleckstrin homology domain containing A1 [Source:HGNC Symbol;Acc:HGNC:14335]              |
| SKIV2L                                                                                                                        | Ski2 like RNA helicase [Source:HGNC Symbol;Acc:HGNC:10898]                                |
| CST3                                                                                                                          | cystatin C [Source:HGNC Symbol;Acc:HGNC:2475]                                             |

|          |                                                                                                     |
|----------|-----------------------------------------------------------------------------------------------------|
| COL18A1  | collagen type XVIII alpha 1 chain [Source:HGNC Symbol;Acc:HGNC:2195]                                |
| RAD51B   | RAD51 paralog B [Source:HGNC Symbol;Acc:HGNC:9822]                                                  |
| TNXB     | tenascin XB [Source:HGNC Symbol;Acc:HGNC:11976]                                                     |
| COL8A1   | collagen type VIII alpha 1 [Source:HGNC Symbol;Acc:HGNC:2215]                                       |
| ALDH3A2  | aldehyde dehydrogenase 3 family member A2 [Source:HGNC Symbol;Acc:HGNC:403]                         |
| TGFB1    | transforming growth factor beta receptor 1 [Source:HGNC Symbol;Acc:HGNC:11772]                      |
| TOMM40   | translocase of outer mitochondrial membrane 40 [Source:HGNC Symbol;Acc:HGNC:18001]                  |
| RDH5     | retinol dehydrogenase 5 [Source:HGNC Symbol;Acc:HGNC:9940]                                          |
| CFHR5    | complement factor H related 5 [Source:HGNC Symbol;Acc:HGNC:24668]                                   |
| B3GLCT   | beta 3-glucosyltransferase [Source:HGNC Symbol;Acc:HGNC:20207]                                      |
| REST     | RE1 silencing transcription factor [Source:HGNC Symbol;Acc:HGNC:9966]                               |
| NELFE    | negative elongation factor complex member E [Source:HGNC Symbol;Acc:HGNC:13974]                     |
| ATXN7    | ataxin 7 [Source:HGNC Symbol;Acc:HGNC:10560]                                                        |
| SCAPER   | S-phase cyclin A associated protein in the ER [Source:HGNC Symbol;Acc:HGNC:13081]                   |
| PILRA    | paired immunoglobulin like type 2 receptor alpha [Source:HGNC Symbol;Acc:HGNC:20396]                |
| ACAD10   | acyl-CoA dehydrogenase family member 10 [Source:HGNC Symbol;Acc:HGNC:21597]                         |
| PITPNM3  | PITPNM family member 3 [Source:HGNC Symbol;Acc:HGNC:21043]                                          |
| SYN3     | synapsin III [Source:HGNC Symbol;Acc:HGNC:11496]                                                    |
| FBN2     | fibrillin 2 [Source:HGNC Symbol;Acc:HGNC:3604]                                                      |
| ERCC2    | ERCC excision repair 2, TFIIH core complex helicase subunit [Source:HGNC Symbol;Acc:HGNC:3434]      |
| COL10A1  | collagen type X alpha 1 chain [Source:HGNC Symbol;Acc:HGNC:2185]                                    |
| TRPM1    | transient receptor potential cation channel subfamily M member 1 [Source:HGNC Symbol;Acc:HGNC:7146] |
| NOTCH4   | notch 4 [Source:HGNC Symbol;Acc:HGNC:7884]                                                          |
| RNF113A  | ring finger protein 113A [Source:HGNC Symbol;Acc:HGNC:12974]                                        |
| SPG11    | spastic paraplegia 11 (autosomal recessive) [Source:HGNC Symbol;Acc:HGNC:11226]                     |
| PLXNA2   | plexin A2 [Source:HGNC Symbol;Acc:HGNC:9100]                                                        |
| TRAF3IP1 | TRAF3 interacting protein 1 [Source:HGNC Symbol;Acc:HGNC:17861]                                     |
| AMD1     | adenosylmethionine decarboxylase 1 [Source:HGNC Symbol;Acc:HGNC:457]                                |
| PPT1     | palmitoyl-protein thioesterase 1 [Source:HGNC Symbol;Acc:HGNC:9325]                                 |
| FUT6     | fucosyltransferase 6 [Source:HGNC Symbol;Acc:HGNC:4017]                                             |
| PRCD     | progressive rod-cone degeneration [Source:HGNC Symbol;Acc:HGNC:32528]                               |
| ZFYVE26  | zinc finger FYVE-type containing 26 [Source:HGNC Symbol;Acc:HGNC:20761]                             |
| SRPK2    | SRSF protein kinase 2 [Source:HGNC Symbol;Acc:HGNC:11306]                                           |
| DPF3     | double PHD fingers 3 [Source:HGNC Symbol;Acc:HGNC:17427]                                            |
| PLA2G12A | phospholipase A2 group XIIA [Source:HGNC Symbol;Acc:HGNC:18554]                                     |
| ANO10    | anoctamin 10 [Source:HGNC Symbol;Acc:HGNC:25519]                                                    |
| NT5DC1   | 5'-nucleotidase domain containing 1 [Source:HGNC Symbol;Acc:HGNC:21556]                             |
| EFEMP1   | EGF containing fibulin like extracellular matrix protein 1 [Source:HGNC Symbol;Acc:HGNC:3218]       |
| RPGRIP1  | retinitis pigmentosa GTPase regulator interacting protein 1 [Source:HGNC Symbol;Acc:HGNC:13436]     |



|          |                                                                                                               |
|----------|---------------------------------------------------------------------------------------------------------------|
| SERPINF1 | serpin family F member 1 [Source:HGNC Symbol;Acc:HGNC:8824]                                                   |
| BBS9     | Bardet-Biedl syndrome 9 [Source:HGNC Symbol;Acc:HGNC:30000]                                                   |
| ABCC6    | ATP binding cassette subfamily C member 6 [Source:HGNC Symbol;Acc:HGNC:57]                                    |
| KDR      | kinase insert domain receptor [Source:HGNC Symbol;Acc:HGNC:6307]                                              |
| HS3ST4   | heparan sulfate-glucosamine 3-sulfotransferase 4 [Source:HGNC Symbol;Acc:HGNC:5200]                           |
| NECTIN2  | nectin cell adhesion molecule 2 [Source:HGNC Symbol;Acc:HGNC:9707]                                            |
| SEMA4A   | semaphorin 4A [Source:HGNC Symbol;Acc:HGNC:10729]                                                             |
| GTF2H5   | general transcription factor IIH subunit 5 [Source:HGNC Symbol;Acc:HGNC:21157]                                |
| RPE      | ribulose-5-phosphate-3-epimerase [Source:HGNC Symbol;Acc:HGNC:10293]                                          |
| XYLT1    | xylosyltransferase 1 [Source:HGNC Symbol;Acc:HGNC:15516]                                                      |
| RREB1    | ras responsive element binding protein 1 [Source:HGNC Symbol;Acc:HGNC:10449]                                  |
| CHST6    | carbohydrate sulfotransferase 6 [Source:HGNC Symbol;Acc:HGNC:6938]                                            |
| CXCL8    | C-X-C motif chemokine ligand 8 [Source:HGNC Symbol;Acc:HGNC:6025]                                             |
| ARHGAP21 | Rho GTPase activating protein 21 [Source:HGNC Symbol;Acc:HGNC:23725]                                          |
| MARK4    | microtubule affinity regulating kinase 4 [Source:HGNC Symbol;Acc:HGNC:13538]                                  |
| TMEM97   | transmembrane protein 97 [Source:HGNC Symbol;Acc:HGNC:28106]                                                  |
| TST      | thiosulfate sulfurtransferase [Source:HGNC Symbol;Acc:HGNC:12388]                                             |
| IL6      | interleukin 6 [Source:HGNC Symbol;Acc:HGNC:6018]                                                              |
| GTF2E2   | general transcription factor IIE subunit 2 [Source:HGNC Symbol;Acc:HGNC:4651]                                 |
| SERPING1 | serpin family G member 1 [Source:HGNC Symbol;Acc:HGNC:1228]                                                   |
| XYLT2    | xylosyltransferase 2 [Source:HGNC Symbol;Acc:HGNC:15517]                                                      |
| PBX2     | PBX homeobox 2 [Source:HGNC Symbol;Acc:HGNC:8633]                                                             |
| NFE2L2   | nuclear factor, erythroid 2 like 2 [Source:HGNC Symbol;Acc:HGNC:7782]                                         |
| KCNT2    | potassium sodium-activated channel subfamily T member 2 [Source:HGNC Symbol;Acc:HGNC:18866]                   |
| MYO5A    | myosin VA [Source:HGNC Symbol;Acc:HGNC:7602]                                                                  |
| CCL2     | C-C motif chemokine ligand 2 [Source:HGNC Symbol;Acc:HGNC:10618]                                              |
| FTCD     | formimidoyltransferase cyclodeaminase [Source:HGNC Symbol;Acc:HGNC:3974]                                      |
| CNN2     | calponin 2 [Source:HGNC Symbol;Acc:HGNC:2156]                                                                 |
| MPLKIP   | M-phase specific PLK1 interacting protein [Source:HGNC Symbol;Acc:HGNC:16002]                                 |
| ABHD2    | abhydrolase domain containing 2 [Source:HGNC Symbol;Acc:HGNC:18717]                                           |
| TRPM3    | transient receptor potential cation channel subfamily M member 3 [Source:HGNC Symbol;Acc:HGNC:17992]          |
| CLN3     | ceroid-lipofuscinosis, neuronal 3 [Source:HGNC Symbol;Acc:HGNC:2074]                                          |
| CX3CR1   | C-X3-C motif chemokine receptor 1 [Source:HGNC Symbol;Acc:HGNC:2558]                                          |
| NPLOC4   | NPL4 homolog, ubiquitin recognition factor [Source:HGNC Symbol;Acc:HGNC:18261]                                |
| CYP21A2  | cytochrome P450 family 21 subfamily A member 2 [Source:HGNC Symbol;Acc:HGNC:2600]                             |
| HERC1    | HECT and RLD domain containing E3 ubiquitin protein ligase family member 1 [Source:HGNC Symbol;Acc:HGNC:4867] |
| ATP6V0D1 | ATPase H <sup>+</sup> transporting V0 subunit d1 [Source:HGNC Symbol;Acc:HGNC:13724]                          |
| SYCE1    | synaptonemal complex central element protein 1 [Source:HGNC Symbol;Acc:HGNC:28852]                            |
| BBS5     | Bardet-Biedl syndrome 5 [Source:HGNC Symbol;Acc:HGNC:970]                                                     |

|          |                                                                                                     |
|----------|-----------------------------------------------------------------------------------------------------|
| TTC8     | tetratricopeptide repeat domain 8 [Source:HGNC Symbol;Acc:HGNC:20087]                               |
| CRP      | C-reactive protein, pentraxin-related [Source:HGNC Symbol;Acc:HGNC:2367]                            |
| ERCC3    | ERCC excision repair 3, TFIIH core complex helicase subunit [Source:HGNC Symbol;Acc:HGNC:3435]      |
| CEP78    | centrosomal protein 78 [Source:HGNC Symbol;Acc:HGNC:25740]                                          |
| STK19    | serine/threonine kinase 19 [Source:HGNC Symbol;Acc:HGNC:11398]                                      |
| NLRP3    | NLR family pyrin domain containing 3 [Source:HGNC Symbol;Acc:HGNC:16400]                            |
| EXOC3L2  | exocyst complex component 3-like 2 [Source:HGNC Symbol;Acc:HGNC:30162]                              |
| COL4A3   | collagen type IV alpha 3 chain [Source:HGNC Symbol;Acc:HGNC:2204]                                   |
| ALDH1A2  | aldehyde dehydrogenase 1 family member A2 [Source:HGNC Symbol;Acc:HGNC:15472]                       |
| TLR3     | toll like receptor 3 [Source:HGNC Symbol;Acc:HGNC:11849]                                            |
| GABPA    | GA binding protein transcription factor alpha subunit [Source:HGNC Symbol;Acc:HGNC:4071]            |
| MMP2     | matrix metalloproteinase 2 [Source:HGNC Symbol;Acc:HGNC:7166]                                       |
| IL1B     | interleukin 1 beta [Source:HGNC Symbol;Acc:HGNC:5992]                                               |
| HIF1A    | hypoxia inducible factor 1 alpha subunit [Source:HGNC Symbol;Acc:HGNC:4910]                         |
| FHL1     | four and a half LIM domains 1 [Source:HGNC Symbol;Acc:HGNC:3702]                                    |
| LPL      | lipoprotein lipase [Source:HGNC Symbol;Acc:HGNC:6677]                                               |
| FLT1     | fms related tyrosine kinase 1 [Source:HGNC Symbol;Acc:HGNC:3763]                                    |
| SOD2     | superoxide dismutase 2, mitochondrial [Source:HGNC Symbol;Acc:HGNC:11180]                           |
| TNF      | tumor necrosis factor [Source:HGNC Symbol;Acc:HGNC:11892]                                           |
| APOB     | apolipoprotein B [Source:HGNC Symbol;Acc:HGNC:603]                                                  |
| PON1     | paraoxonase 1 [Source:HGNC Symbol;Acc:HGNC:9204]                                                    |
| MMP9     | matrix metalloproteinase 9 [Source:HGNC Symbol;Acc:HGNC:7176]                                       |
| PRPH     | peripherin [Source:HGNC Symbol;Acc:HGNC:9461]                                                       |
| GSTM1    | glutathione S-transferase mu 1 [Source:HGNC Symbol;Acc:HGNC:4632]                                   |
| CD36     | CD36 molecule [Source:HGNC Symbol;Acc:HGNC:1663]                                                    |
| AKR1A1   | aldo-keto reductase family 1 member A1 [Source:HGNC Symbol;Acc:HGNC:380]                            |
| IL17A    | interleukin 17A [Source:HGNC Symbol;Acc:HGNC:5981]                                                  |
| ACE      | angiotensin I converting enzyme [Source:HGNC Symbol;Acc:HGNC:2707]                                  |
| SOD1     | superoxide dismutase 1, soluble [Source:HGNC Symbol;Acc:HGNC:11179]                                 |
| ARMC9    | armadillo repeat containing 9 [Source:HGNC Symbol;Acc:HGNC:20730]                                   |
| GSTT1    | glutathione S-transferase theta 1 [Source:HGNC Symbol;Acc:HGNC:4641]                                |
| RS1      | retinoschisin 1 [Source:HGNC Symbol;Acc:HGNC:10457]                                                 |
| TLR2     | toll like receptor 2 [Source:HGNC Symbol;Acc:HGNC:11848]                                            |
| PPARGC1A | PPARG coactivator 1 alpha [Source:HGNC Symbol;Acc:HGNC:9237]                                        |
| CP       | ceruloplasmin [Source:HGNC Symbol;Acc:HGNC:2295]                                                    |
| MME      | membrane metallo-endopeptidase [Source:HGNC Symbol;Acc:HGNC:7154]                                   |
| FGF2     | fibroblast growth factor 2 [Source:HGNC Symbol;Acc:HGNC:3676]                                       |
| IL18     | interleukin 18 [Source:HGNC Symbol;Acc:HGNC:5986]                                                   |
| SMUG1    | single-strand-selective monofunctional uracil-DNA glycosylase 1 [Source:HGNC Symbol;Acc:HGNC:17148] |
| PPARA    | peroxisome proliferator activated receptor alpha [Source:HGNC Symbol;Acc:HGNC:9232]                 |

|        |                                                                                                          |
|--------|----------------------------------------------------------------------------------------------------------|
| PGF    | placental growth factor [Source:HGNC Symbol;Acc:HGNC:8893]                                               |
| CD59   | CD59 molecule [Source:HGNC Symbol;Acc:HGNC:1689]                                                         |
| SIRT1  | sirtuin 1 [Source:HGNC Symbol;Acc:HGNC:14929]                                                            |
| SLC2A1 | solute carrier family 2 member 1 [Source:HGNC Symbol;Acc:HGNC:11005]                                     |
| ABCG1  | ATP binding cassette subfamily G member 1 [Source:HGNC Symbol;Acc:HGNC:73]                               |
| ADM    | adrenomedullin [Source:HGNC Symbol;Acc:HGNC:259]                                                         |
| AHR    | aryl hydrocarbon receptor [Source:HGNC Symbol;Acc:HGNC:348]                                              |
| CRX    | cone-rod homeobox [Source:HGNC Symbol;Acc:HGNC:2383]                                                     |
| CRYAB  | crystallin alpha B [Source:HGNC Symbol;Acc:HGNC:2389]                                                    |
| SGCD   | sarcoglycan delta [Source:HGNC Symbol;Acc:HGNC:10807]                                                    |
| ELN    | elastin [Source:HGNC Symbol;Acc:HGNC:3327]                                                               |
| SUCLA2 | succinate-CoA ligase ADP-forming beta subunit [Source:HGNC Symbol;Acc:HGNC:11448]                        |
| IGF1   | insulin like growth factor 1 [Source:HGNC Symbol;Acc:HGNC:5464]                                          |
| MAPK3  | mitogen-activated protein kinase 3 [Source:HGNC Symbol;Acc:HGNC:6877]                                    |
| GSTP1  | glutathione S-transferase pi 1 [Source:HGNC Symbol;Acc:HGNC:4638]                                        |
| TF     | transferrin [Source:HGNC Symbol;Acc:HGNC:11740]                                                          |
| HPGDS  | hematopoietic prostaglandin D synthase [Source:HGNC Symbol;Acc:HGNC:17890]                               |
| IL17RC | interleukin 17 receptor C [Source:HGNC Symbol;Acc:HGNC:18358]                                            |
| BDNF   | brain derived neurotrophic factor [Source:HGNC Symbol;Acc:HGNC:1033]                                     |
| MBL2   | mannose binding lectin 2 [Source:HGNC Symbol;Acc:HGNC:6922]                                              |
| OGG1   | 8-oxoguanine DNA glycosylase [Source:HGNC Symbol;Acc:HGNC:8125]                                          |
| CXCL10 | C-X-C motif chemokine ligand 10 [Source:HGNC Symbol;Acc:HGNC:10637]                                      |
| CCR3   | C-C motif chemokine receptor 3 [Source:HGNC Symbol;Acc:HGNC:1604]                                        |
| F3     | coagulation factor III, tissue factor [Source:HGNC Symbol;Acc:HGNC:3541]                                 |
| RENBP  | renin binding protein [Source:HGNC Symbol;Acc:HGNC:9959]                                                 |
| ADIPOQ | adiponectin, C1Q and collagen domain containing [Source:HGNC Symbol;Acc:HGNC:13633]                      |
| HLA-C  | major histocompatibility complex, class I, C [Source:HGNC Symbol;Acc:HGNC:4933]                          |
| BMP4   | bone morphogenetic protein 4 [Source:HGNC Symbol;Acc:HGNC:1071]                                          |
| PTX3   | pentraxin 3 [Source:HGNC Symbol;Acc:HGNC:9692]                                                           |
| P2RX7  | purinergic receptor P2X 7 [Source:HGNC Symbol;Acc:HGNC:8537]                                             |
| SCARB1 | scavenger receptor class B member 1 [Source:HGNC Symbol;Acc:HGNC:1664]                                   |
| CX3CL1 | C-X3-C motif chemokine ligand 1 [Source:HGNC Symbol;Acc:HGNC:10647]                                      |
| DICER1 | dicer 1, ribonuclease III [Source:HGNC Symbol;Acc:HGNC:17098]                                            |
| GSTK1  | glutathione S-transferase kappa 1 [Source:HGNC Symbol;Acc:HGNC:16906]                                    |
| PIK3CB | phosphatidylinositol-4,5-bisphosphate 3-kinase catalytic subunit beta [Source:HGNC Symbol;Acc:HGNC:8976] |
| IL10   | interleukin 10 [Source:HGNC Symbol;Acc:HGNC:5962]                                                        |
| ACAT1  | acetyl-CoA acetyltransferase 1 [Source:HGNC Symbol;Acc:HGNC:93]                                          |
| IL33   | interleukin 33 [Source:HGNC Symbol;Acc:HGNC:16028]                                                       |
| TNMD   | tenomodulin [Source:HGNC Symbol;Acc:HGNC:17757]                                                          |
| NUP62  | nucleoporin 62 [Source:HGNC Symbol;Acc:HGNC:8066]                                                        |
| LAMP1  | lysosomal associated membrane protein 1 [Source:HGNC Symbol;Acc:HGNC:6499]                               |

|          |                                                                                                           |
|----------|-----------------------------------------------------------------------------------------------------------|
| FTMT     | ferritin mitochondrial [Source:HGNC Symbol;Acc:HGNC:17345]                                                |
| MUTYH    | mutY DNA glycosylase [Source:HGNC Symbol;Acc:HGNC:7527]                                                   |
| ATM      | ATM serine/threonine kinase [Source:HGNC Symbol;Acc:HGNC:795]                                             |
| CLU      | clusterin [Source:HGNC Symbol;Acc:HGNC:2095]                                                              |
| OCA2     | OCA2 melanosomal transmembrane protein [Source:HGNC Symbol;Acc:HGNC:8101]                                 |
| OTX2     | orthodenticle homeobox 2 [Source:HGNC Symbol;Acc:HGNC:8522]                                               |
| SERPINE1 | serpin family E member 1 [Source:HGNC Symbol;Acc:HGNC:8583]                                               |
| DCTN4    | dynactin subunit 4 [Source:HGNC Symbol;Acc:HGNC:15518]                                                    |
| PNPLA2   | patatin like phospholipase domain containing 2 [Source:HGNC Symbol;Acc:HGNC:30802]                        |
| CFP      | complement factor properdin [Source:HGNC Symbol;Acc:HGNC:8864]                                            |
| PIK3CA   | phosphatidylinositol-4,5-bisphosphate 3-kinase catalytic subunit alpha [Source:HGNC Symbol;Acc:HGNC:8975] |
| PIK3CD   | phosphatidylinositol-4,5-bisphosphate 3-kinase catalytic subunit delta [Source:HGNC Symbol;Acc:HGNC:8977] |
| PIK3CG   | phosphatidylinositol-4,5-bisphosphate 3-kinase catalytic subunit gamma [Source:HGNC Symbol;Acc:HGNC:8978] |
| SUCNR1   | succinate receptor 1 [Source:HGNC Symbol;Acc:HGNC:4542]                                                   |
| PLG      | plasminogen [Source:HGNC Symbol;Acc:HGNC:9071]                                                            |
| POLR2B   | polymerase (RNA) II subunit B [Source:HGNC Symbol;Acc:HGNC:9188]                                          |
| MAPK1    | mitogen-activated protein kinase 1 [Source:HGNC Symbol;Acc:HGNC:6871]                                     |
| MT2A     | metallothionein 2A [Source:HGNC Symbol;Acc:HGNC:7406]                                                     |
| RGS10    | regulator of G-protein signaling 10 [Source:HGNC Symbol;Acc:HGNC:9992]                                    |
| RORA     | RAR related orphan receptor A [Source:HGNC Symbol;Acc:HGNC:10258]                                         |
| GDF6     | growth differentiation factor 6 [Source:HGNC Symbol;Acc:HGNC:4221]                                        |
| MYOM2    | myomesin 2 [Source:HGNC Symbol;Acc:HGNC:7614]                                                             |
| CHI3L1   | chitinase 3 like 1 [Source:HGNC Symbol;Acc:HGNC:1932]                                                     |
| CXCR5    | C-X-C motif chemokine receptor 5 [Source:HGNC Symbol;Acc:HGNC:1060]                                       |
| LRP6     | LDL receptor related protein 6 [Source:HGNC Symbol;Acc:HGNC:6698]                                         |
| DAPL1    | death associated protein like 1 [Source:HGNC Symbol;Acc:HGNC:21490]                                       |
| SELE     | selectin E [Source:HGNC Symbol;Acc:HGNC:10718]                                                            |
| FKBPL    | FK506 binding protein like [Source:HGNC Symbol;Acc:HGNC:13949]                                            |
| CXCL12   | C-X-C motif chemokine ligand 12 [Source:HGNC Symbol;Acc:HGNC:10672]                                       |
| CXCL11   | C-X-C motif chemokine ligand 11 [Source:HGNC Symbol;Acc:HGNC:10638]                                       |
| MT-ND2   | mitochondrially encoded NADH:ubiquinone oxidoreductase core subunit 2 [Source:HGNC Symbol;Acc:HGNC:7456]  |
| MAN2B1   | mannosidase alpha class 2B member 1 [Source:HGNC Symbol;Acc:HGNC:6826]                                    |
| KHDRBS1  | KH RNA binding domain containing, signal transduction associated 1 [Source:HGNC Symbol;Acc:HGNC:18116]    |
| POSTN    | periostin [Source:HGNC Symbol;Acc:HGNC:16953]                                                             |
| MEFV     | Mediterranean fever [Source:HGNC Symbol;Acc:HGNC:6998]                                                    |
| PPARG    | peroxisome proliferator activated receptor gamma [Source:HGNC Symbol;Acc:HGNC:9236]                       |
| IGFBP7   | insulin like growth factor binding protein 7 [Source:HGNC Symbol;Acc:HGNC:5476]                           |
| AGBL4    | ATP/GTP binding protein-like 4 [Source:HGNC Symbol;Acc:HGNC:25892]                                        |

|          |                                                                                                |
|----------|------------------------------------------------------------------------------------------------|
| SETD2    | SET domain containing 2 [Source:HGNC Symbol;Acc:HGNC:18420]                                    |
| DECR1    | 2,4-dienoyl-CoA reductase 1, mitochondrial [Source:HGNC Symbol;Acc:HGNC:2753]                  |
| PDE5A    | phosphodiesterase 5A [Source:HGNC Symbol;Acc:HGNC:8784]                                        |
| GSTM5    | glutathione S-transferase mu 5 [Source:HGNC Symbol;Acc:HGNC:4637]                              |
| AIF1     | allograft inflammatory factor 1 [Source:HGNC Symbol;Acc:HGNC:352]                              |
| GTF2H1   | general transcription factor IIH subunit 1 [Source:HGNC Symbol;Acc:HGNC:4655]                  |
| NOA1     | nitric oxide associated 1 [Source:HGNC Symbol;Acc:HGNC:28473]                                  |
| SLCO6A1  | solute carrier organic anion transporter family member 6A1 [Source:HGNC Symbol;Acc:HGNC:23613] |
| HLA-B    | major histocompatibility complex, class I, B [Source:HGNC Symbol;Acc:HGNC:4932]                |
| VTN      | vitronectin [Source:HGNC Symbol;Acc:HGNC:12724]                                                |
| ANPEP    | alanyl aminopeptidase, membrane [Source:HGNC Symbol;Acc:HGNC:500]                              |
| VLDLR    | very low density lipoprotein receptor [Source:HGNC Symbol;Acc:HGNC:12698]                      |
| CAT      | catalase [Source:HGNC Symbol;Acc:HGNC:1516]                                                    |
| PAGR1    | PAXIP1 associated glutamate rich protein 1 [Source:HGNC Symbol;Acc:HGNC:28707]                 |
| AGER     | advanced glycosylation end product-specific receptor [Source:HGNC Symbol;Acc:HGNC:320]         |
| CTRB1    | chymotrypsinogen B1 [Source:HGNC Symbol;Acc:HGNC:2521]                                         |
| UNG      | uracil DNA glycosylase [Source:HGNC Symbol;Acc:HGNC:12572]                                     |
| CYP27A1  | cytochrome P450 family 27 subfamily A member 1 [Source:HGNC Symbol;Acc:HGNC:2605]              |
| ANG      | angiogenin [Source:HGNC Symbol;Acc:HGNC:483]                                                   |
| GAS6     | growth arrest specific 6 [Source:HGNC Symbol;Acc:HGNC:4168]                                    |
| CD55     | CD55 molecule (Cromer blood group) [Source:HGNC Symbol;Acc:HGNC:2665]                          |
| FGFR1    | fibroblast growth factor receptor 1 [Source:HGNC Symbol;Acc:HGNC:3688]                         |
| NAT2     | N-acetyltransferase 2 (arylamine N-acetyltransferase) [Source:HGNC Symbol;Acc:HGNC:7646]       |
| VWF      | von Willebrand factor [Source:HGNC Symbol;Acc:HGNC:12726]                                      |
| TSPO     | translocator protein [Source:HGNC Symbol;Acc:HGNC:1158]                                        |
| HP       | haptoglobin [Source:HGNC Symbol;Acc:HGNC:5141]                                                 |
| TGFB1    | transforming growth factor beta 1 [Source:HGNC Symbol;Acc:HGNC:11766]                          |
| ALB      | albumin [Source:HGNC Symbol;Acc:HGNC:399]                                                      |
| MFRP     | membrane frizzled-related protein [Source:HGNC Symbol;Acc:HGNC:18121]                          |
| XRCC1    | X-ray repair cross complementing 1 [Source:HGNC Symbol;Acc:HGNC:12828]                         |
| CFD      | complement factor D [Source:HGNC Symbol;Acc:HGNC:2771]                                         |
| DIAPH2   | diaphanous related formin 2 [Source:HGNC Symbol;Acc:HGNC:2877]                                 |
| TFR2     | transferrin receptor 2 [Source:HGNC Symbol;Acc:HGNC:11762]                                     |
| HMOX2    | heme oxygenase 2 [Source:HGNC Symbol;Acc:HGNC:5014]                                            |
| CASP1    | caspase 1 [Source:HGNC Symbol;Acc:HGNC:1499]                                                   |
| HLA-DQB1 | major histocompatibility complex, class II, DQ beta 1 [Source:HGNC Symbol;Acc:HGNC:4944]       |
| PEA15    | phosphoprotein enriched in astrocytes 15 [Source:HGNC Symbol;Acc:HGNC:8822]                    |
| HLA-G    | major histocompatibility complex, class I, G [Source:HGNC Symbol;Acc:HGNC:4964]                |
| GALNS    | galactosamine (N-acetyl)-6-sulfatase [Source:HGNC Symbol;Acc:HGNC:4122]                        |
| TIMP1    | TIMP metalloproteinase inhibitor 1 [Source:HGNC Symbol;Acc:HGNC:11820]                         |
| EPHX1    | epoxide hydrolase 1 [Source:HGNC Symbol;Acc:HGNC:3401]                                         |

|         |                                                                                                             |
|---------|-------------------------------------------------------------------------------------------------------------|
| FSCN2   | fascin actin-bundling protein 2, retinal [Source:HGNC Symbol;Acc:HGNC:3960]                                 |
| GAST    | gastrin [Source:HGNC Symbol;Acc:HGNC:4164]                                                                  |
| IL21    | interleukin 21 [Source:HGNC Symbol;Acc:HGNC:6005]                                                           |
| AOC3    | amine oxidase, copper containing 3 [Source:HGNC Symbol;Acc:HGNC:550]                                        |
| CACNA1C | calcium voltage-gated channel subunit alpha1 C [Source:HGNC Symbol;Acc:HGNC:1390]                           |
| GRAP2   | GRB2-related adaptor protein 2 [Source:HGNC Symbol;Acc:HGNC:4563]                                           |
| ADIPOR2 | adiponectin receptor 2 [Source:HGNC Symbol;Acc:HGNC:24041]                                                  |
| CD34    | CD34 molecule [Source:HGNC Symbol;Acc:HGNC:1662]                                                            |
| EDF1    | endothelial differentiation related factor 1 [Source:HGNC Symbol;Acc:HGNC:3164]                             |
| ALDH5A1 | aldehyde dehydrogenase 5 family member A1 [Source:HGNC Symbol;Acc:HGNC:408]                                 |
| CXCR4   | C-X-C motif chemokine receptor 4 [Source:HGNC Symbol;Acc:HGNC:2561]                                         |
| ABCG2   | ATP binding cassette subfamily G member 2 (Junior blood group) [Source:HGNC Symbol;Acc:HGNC:74]             |
| ITM2B   | integral membrane protein 2B [Source:HGNC Symbol;Acc:HGNC:6174]                                             |
| REG1A   | regenerating family member 1 alpha [Source:HGNC Symbol;Acc:HGNC:9951]                                       |
| RFC2    | replication factor C subunit 2 [Source:HGNC Symbol;Acc:HGNC:9970]                                           |
| BCL2    | B-cell CLL/lymphoma 2 [Source:HGNC Symbol;Acc:HGNC:990]                                                     |
| FADS2   | fatty acid desaturase 2 [Source:HGNC Symbol;Acc:HGNC:3575]                                                  |
| IL27RA  | interleukin 27 receptor subunit alpha [Source:HGNC Symbol;Acc:HGNC:17290]                                   |
| RAP1A   | RAP1A, member of RAS oncogene family [Source:HGNC Symbol;Acc:HGNC:9855]                                     |
| AIMP2   | aminoacyl tRNA synthetase complex interacting multifunctional protein 2 [Source:HGNC Symbol;Acc:HGNC:20609] |
| HDAC11  | histone deacetylase 11 [Source:HGNC Symbol;Acc:HGNC:19086]                                                  |
| TLR10   | toll like receptor 10 [Source:HGNC Symbol;Acc:HGNC:15634]                                                   |
| CAPG    | capping actin protein, gelsolin like [Source:HGNC Symbol;Acc:HGNC:1474]                                     |
| HDAC9   | histone deacetylase 9 [Source:HGNC Symbol;Acc:HGNC:14065]                                                   |
| MASP1   | mannan binding lectin serine peptidase 1 [Source:HGNC Symbol;Acc:HGNC:6901]                                 |
| KEAP1   | kelch like ECH associated protein 1 [Source:HGNC Symbol;Acc:HGNC:23177]                                     |
| XCL1    | X-C motif chemokine ligand 1 [Source:HGNC Symbol;Acc:HGNC:10645]                                            |
| FZD4    | frizzled class receptor 4 [Source:HGNC Symbol;Acc:HGNC:4042]                                                |
| MYDGF   | myeloid derived growth factor [Source:HGNC Symbol;Acc:HGNC:16948]                                           |
| MAPK8   | mitogen-activated protein kinase 8 [Source:HGNC Symbol;Acc:HGNC:6881]                                       |
| SESN2   | sestrin 2 [Source:HGNC Symbol;Acc:HGNC:20746]                                                               |
| CASP5   | caspase 5 [Source:HGNC Symbol;Acc:HGNC:1506]                                                                |
| APOM    | apolipoprotein M [Source:HGNC Symbol;Acc:HGNC:13916]                                                        |
| ZEB2    | zinc finger E-box binding homeobox 2 [Source:HGNC Symbol;Acc:HGNC:14881]                                    |
| CASP8   | caspase 8 [Source:HGNC Symbol;Acc:HGNC:1509]                                                                |
| FGD6    | FYVE, RhoGEF and PH domain containing 6 [Source:HGNC Symbol;Acc:HGNC:21740]                                 |
| HEPH    | hephaestin [Source:HGNC Symbol;Acc:HGNC:4866]                                                               |
| PROK1   | prokineticin 1 [Source:HGNC Symbol;Acc:HGNC:18454]                                                          |
| FNDC1   | fibronectin type III domain containing 1 [Source:HGNC Symbol;Acc:HGNC:21184]                                |
| RAD51   | RAD51 recombinase [Source:HGNC Symbol;Acc:HGNC:9817]                                                        |

|           |                                                                                                 |
|-----------|-------------------------------------------------------------------------------------------------|
| CALCR     | calcitonin receptor [Source:HGNC Symbol;Acc:HGNC:1440]                                          |
| SCD5      | stearoyl-CoA desaturase 5 [Source:HGNC Symbol;Acc:HGNC:21088]                                   |
| CTNNB1    | catenin beta 1 [Source:HGNC Symbol;Acc:HGNC:2514]                                               |
| TBPL1     | TATA-box binding protein like 1 [Source:HGNC Symbol;Acc:HGNC:11589]                             |
| HAMP      | hepcidin antimicrobial peptide [Source:HGNC Symbol;Acc:HGNC:15598]                              |
| CD40      | CD40 molecule [Source:HGNC Symbol;Acc:HGNC:11919]                                               |
| LRRTM4    | leucine rich repeat transmembrane neuronal 4 [Source:HGNC Symbol;Acc:HGNC:19411]                |
| GEMIN2    | gem nuclear organelle associated protein 2 [Source:HGNC Symbol;Acc:HGNC:10884]                  |
| KIDINS220 | kinase D-interacting substrate 220kDa [Source:HGNC Symbol;Acc:HGNC:29508]                       |
| PTEN      | phosphatase and tensin homolog [Source:HGNC Symbol;Acc:HGNC:9588]                               |
| SLURP1    | secreted LY6/PLAUR domain containing 1 [Source:HGNC Symbol;Acc:HGNC:18746]                      |
| WDCP      | WD repeat and coiled coil containing [Source:HGNC Symbol;Acc:HGNC:26157]                        |
| SEMA3E    | semaphorin 3E [Source:HGNC Symbol;Acc:HGNC:10727]                                               |
| BBX       | BBX, HMG-box containing [Source:HGNC Symbol;Acc:HGNC:14422]                                     |
| CALR      | calreticulin [Source:HGNC Symbol;Acc:HGNC:1455]                                                 |
| SKI       | SKI proto-oncogene [Source:HGNC Symbol;Acc:HGNC:10896]                                          |
| ZFP36     | ZFP36 ring finger protein [Source:HGNC Symbol;Acc:HGNC:12862]                                   |
| TERF2     | telomeric repeat binding factor 2 [Source:HGNC Symbol;Acc:HGNC:11729]                           |
| SLC6A8    | solute carrier family 6 member 8 [Source:HGNC Symbol;Acc:HGNC:11055]                            |
| TSPAN7    | tetraspanin 7 [Source:HGNC Symbol;Acc:HGNC:11854]                                               |
| SCAF11    | SR-related CTD associated factor 11 [Source:HGNC Symbol;Acc:HGNC:10784]                         |
| SPHK1     | sphingosine kinase 1 [Source:HGNC Symbol;Acc:HGNC:11240]                                        |
| TP53      | tumor protein p53 [Source:HGNC Symbol;Acc:HGNC:11998]                                           |
| TRAF6     | TNF receptor associated factor 6 [Source:HGNC Symbol;Acc:HGNC:12036]                            |
| C3AR1     | complement component 3a receptor 1 [Source:HGNC Symbol;Acc:HGNC:1319]                           |
| TRA2B     | transformer 2 beta homolog (Drosophila) [Source:HGNC Symbol;Acc:HGNC:10781]                     |
| C4A       | complement component 4A (Rodgers blood group) [Source:HGNC Symbol;Acc:HGNC:1323]                |
| C4BPA     | complement component 4 binding protein alpha [Source:HGNC Symbol;Acc:HGNC:1325]                 |
| XPR1      | xenotropic and polytropic retrovirus receptor 1 [Source:HGNC Symbol;Acc:HGNC:12827]             |
| C4BPB     | complement component 4 binding protein beta [Source:HGNC Symbol;Acc:HGNC:1328]                  |
| SET       | SET nuclear proto-oncogene [Source:HGNC Symbol;Acc:HGNC:10760]                                  |
| CAPN5     | calpain 5 [Source:HGNC Symbol;Acc:HGNC:1482]                                                    |
| BMP6      | bone morphogenetic protein 6 [Source:HGNC Symbol;Acc:HGNC:1073]                                 |
| HGS       | hepatocyte growth factor-regulated tyrosine kinase substrate [Source:HGNC Symbol;Acc:HGNC:4897] |
| TLR1      | toll like receptor 1 [Source:HGNC Symbol;Acc:HGNC:11847]                                        |
| TEP1      | telomerase associated protein 1 [Source:HGNC Symbol;Acc:HGNC:11726]                             |
| PPP1R11   | protein phosphatase 1 regulatory inhibitor subunit 11 [Source:HGNC Symbol;Acc:HGNC:9285]        |
| TFRC      | transferrin receptor [Source:HGNC Symbol;Acc:HGNC:11763]                                        |
| KLF5      | Kruppel like factor 5 [Source:HGNC Symbol;Acc:HGNC:6349]                                        |
| UBE3D     | ubiquitin protein ligase E3D [Source:HGNC Symbol;Acc:HGNC:21381]                                |
| STC1      | stanniocalcin 1 [Source:HGNC Symbol;Acc:HGNC:11373]                                             |

|          |                                                                                        |
|----------|----------------------------------------------------------------------------------------|
| TGFB2    | transforming growth factor beta 2 [Source:HGNC Symbol;Acc:HGNC:11768]                  |
| STAT3    | signal transducer and activator of transcription 3 [Source:HGNC Symbol;Acc:HGNC:11364] |
| TGFBR2   | transforming growth factor beta receptor 2 [Source:HGNC Symbol;Acc:HGNC:11773]         |
| THBD     | thrombomodulin [Source:HGNC Symbol;Acc:HGNC:11784]                                     |
| THBS1    | thrombospondin 1 [Source:HGNC Symbol;Acc:HGNC:11785]                                   |
| SRM      | spermidine synthase [Source:HGNC Symbol;Acc:HGNC:11296]                                |
| USP6     | ubiquitin specific peptidase 6 [Source:HGNC Symbol;Acc:HGNC:12629]                     |
| TIMP2    | TIMP metalloproteinase inhibitor 2 [Source:HGNC Symbol;Acc:HGNC:11821]                 |
| SLPI     | secretory leukocyte peptidase inhibitor [Source:HGNC Symbol;Acc:HGNC:11092]            |
| CD5L     | CD5 molecule like [Source:HGNC Symbol;Acc:HGNC:1690]                                   |
| SST      | somatostatin [Source:HGNC Symbol;Acc:HGNC:11329]                                       |
| VEGFC    | vascular endothelial growth factor C [Source:HGNC Symbol;Acc:HGNC:12682]               |
| EZR      | ezrin [Source:HGNC Symbol;Acc:HGNC:12691]                                              |
| VIM      | vimentin [Source:HGNC Symbol;Acc:HGNC:12692]                                           |
| RPE65    | retinal pigment epithelium-specific protein 65kDa [Source:HGNC Symbol;Acc:HGNC:10294]  |
| SLC9A3R2 | SLC9A3 regulator 2 [Source:HGNC Symbol;Acc:HGNC:11076]                                 |
| ACVRL1   | activin A receptor like type 1 [Source:HGNC Symbol;Acc:HGNC:175]                       |
| WNT7A    | Wnt family member 7A [Source:HGNC Symbol;Acc:HGNC:12786]                               |
| ROS1     | ROS proto-oncogene 1, receptor tyrosine kinase [Source:HGNC Symbol;Acc:HGNC:10261]     |
| WNT7B    | Wnt family member 7B [Source:HGNC Symbol;Acc:HGNC:12787]                               |
| ROM1     | retinal outer segment membrane protein 1 [Source:HGNC Symbol;Acc:HGNC:10254]           |
| ROBO1    | roundabout guidance receptor 1 [Source:HGNC Symbol;Acc:HGNC:10249]                     |
| CD28     | CD28 molecule [Source:HGNC Symbol;Acc:HGNC:1653]                                       |
| RHO      | rhodopsin [Source:HGNC Symbol;Acc:HGNC:10012]                                          |
| ACTB     | actin beta [Source:HGNC Symbol;Acc:HGNC:132]                                           |
| MMP20    | matrix metalloproteinase 20 [Source:HGNC Symbol;Acc:HGNC:7167]                         |
| DLGAP1   | DLG associated protein 1 [Source:HGNC Symbol;Acc:HGNC:2905]                            |
| SRL      | sarcalumenin [Source:HGNC Symbol;Acc:HGNC:11295]                                       |
| SELP     | selectin P [Source:HGNC Symbol;Acc:HGNC:10721]                                         |
| SELL     | selectin L [Source:HGNC Symbol;Acc:HGNC:10720]                                         |
| C5       | complement component 5 [Source:HGNC Symbol;Acc:HGNC:1331]                              |
| TTN      | titin [Source:HGNC Symbol;Acc:HGNC:12403]                                              |
| TPPA     | alpha tocopherol transfer protein [Source:HGNC Symbol;Acc:HGNC:12404]                  |
| CAV1     | caveolin 1 [Source:HGNC Symbol;Acc:HGNC:1527]                                          |
| TNFSF14  | tumor necrosis factor superfamily member 14 [Source:HGNC Symbol;Acc:HGNC:11930]        |
| TXN      | thioredoxin [Source:HGNC Symbol;Acc:HGNC:12435]                                        |
| UGT2B17  | UDP glucuronosyltransferase family 2 member B17 [Source:HGNC Symbol;Acc:HGNC:12547]    |
| CXCL5    | C-X-C motif chemokine ligand 5 [Source:HGNC Symbol;Acc:HGNC:10642]                     |
| CXCL6    | C-X-C motif chemokine ligand 6 [Source:HGNC Symbol;Acc:HGNC:10643]                     |
| CCL22    | C-C motif chemokine ligand 22 [Source:HGNC Symbol;Acc:HGNC:10621]                      |
| CDHR1    | cadherin related family member 1 [Source:HGNC Symbol;Acc:HGNC:14550]                   |



|          |                                                                                           |
|----------|-------------------------------------------------------------------------------------------|
| CCL11    | C-C motif chemokine ligand 11 [Source:HGNC Symbol;Acc:HGNC:10610]                         |
| RIPK1    | receptor interacting serine/threonine kinase 1 [Source:HGNC Symbol;Acc:HGNC:10019]        |
| RGR      | retinal G protein coupled receptor [Source:HGNC Symbol;Acc:HGNC:9990]                     |
| ELAVL2   | ELAV like neuron-specific RNA binding protein 2 [Source:HGNC Symbol;Acc:HGNC:3313]        |
| FECH     | ferrochelatase [Source:HGNC Symbol;Acc:HGNC:3647]                                         |
| FGFR2    | fibroblast growth factor receptor 2 [Source:HGNC Symbol;Acc:HGNC:3689]                    |
| VEGFD    | vascular endothelial growth factor D [Source:HGNC Symbol;Acc:HGNC:3708]                   |
| NLRP1    | NLR family pyrin domain containing 1 [Source:HGNC Symbol;Acc:HGNC:14374]                  |
| CD93     | CD93 molecule [Source:HGNC Symbol;Acc:HGNC:15855]                                         |
| DKK1     | dickkopf WNT signaling pathway inhibitor 1 [Source:HGNC Symbol;Acc:HGNC:2891]             |
| FLT4     | fms related tyrosine kinase 4 [Source:HGNC Symbol;Acc:HGNC:3767]                          |
| FMOD     | fibromodulin [Source:HGNC Symbol;Acc:HGNC:3774]                                           |
| FN1      | fibronectin 1 [Source:HGNC Symbol;Acc:HGNC:3778]                                          |
| CRB1     | crumbs 1, cell polarity complex component [Source:HGNC Symbol;Acc:HGNC:2343]              |
| ANGPTL2  | angiopoietin like 2 [Source:HGNC Symbol;Acc:HGNC:490]                                     |
| FOSB     | FosB proto-oncogene, AP-1 transcription factor subunit [Source:HGNC Symbol;Acc:HGNC:3797] |
| FPR1     | formyl peptide receptor 1 [Source:HGNC Symbol;Acc:HGNC:3826]                              |
| FCN2     | ficolin 2 [Source:HGNC Symbol;Acc:HGNC:3624]                                              |
| FCGR3B   | Fc fragment of IgG receptor IIb [Source:HGNC Symbol;Acc:HGNC:3620]                        |
| C6orf223 | chromosome 6 open reading frame 223 [Source:HGNC Symbol;Acc:HGNC:28692]                   |
| EPAS1    | endothelial PAS domain protein 1 [Source:HGNC Symbol;Acc:HGNC:3374]                       |
| EPO      | erythropoietin [Source:HGNC Symbol;Acc:HGNC:3415]                                         |
| ERG      | ERG, ETS transcription factor [Source:HGNC Symbol;Acc:HGNC:3446]                          |
| AKT2     | AKT serine/threonine kinase 2 [Source:HGNC Symbol;Acc:HGNC:392]                           |
| ESR1     | estrogen receptor 1 [Source:HGNC Symbol;Acc:HGNC:3467]                                    |
| ETS1     | ETS proto-oncogene 1, transcription factor [Source:HGNC Symbol;Acc:HGNC:3488]             |
| F2       | coagulation factor II, thrombin [Source:HGNC Symbol;Acc:HGNC:3535]                        |
| F9       | coagulation factor IX [Source:HGNC Symbol;Acc:HGNC:3551]                                  |
| F10      | coagulation factor X [Source:HGNC Symbol;Acc:HGNC:3528]                                   |
| FABP5    | fatty acid binding protein 5 [Source:HGNC Symbol;Acc:HGNC:3560]                           |
| HYLS1    | HYLS1, centriolar and ciliogenesis associated [Source:HGNC Symbol;Acc:HGNC:26558]         |
| FCGR2A   | Fc fragment of IgG receptor IIa [Source:HGNC Symbol;Acc:HGNC:3616]                        |
| FCGR3A   | Fc fragment of IgG receptor IIIa [Source:HGNC Symbol;Acc:HGNC:3619]                       |
| OSBP2    | oxysterol binding protein 2 [Source:HGNC Symbol;Acc:HGNC:8504]                            |
| IL17RA   | interleukin 17 receptor A [Source:HGNC Symbol;Acc:HGNC:5985]                              |
| GEM      | GTP binding protein overexpressed in skeletal muscle [Source:HGNC Symbol;Acc:HGNC:4234]   |
| GHSR     | growth hormone secretagogue receptor [Source:HGNC Symbol;Acc:HGNC:4267]                   |
| CLUL1    | clusterin like 1 [Source:HGNC Symbol;Acc:HGNC:2096]                                       |
| FAM155B  | family with sequence similarity 155 member B [Source:HGNC Symbol;Acc:HGNC:30701]          |
| GCLC     | glutamate-cysteine ligase catalytic subunit [Source:HGNC Symbol;Acc:HGNC:4311]            |
| GCLM     | glutamate-cysteine ligase modifier subunit [Source:HGNC Symbol;Acc:HGNC:4312]             |

|          |                                                                                                |
|----------|------------------------------------------------------------------------------------------------|
| BHLHE22  | basic helix-loop-helix family member e22 [Source:HGNC Symbol;Acc:HGNC:11963]                   |
| SGSM3    | small G protein signaling modulator 3 [Source:HGNC Symbol;Acc:HGNC:25228]                      |
| GNB3     | G protein subunit beta 3 [Source:HGNC Symbol;Acc:HGNC:4400]                                    |
| GNGT2    | G protein subunit gamma transducin 2 [Source:HGNC Symbol;Acc:HGNC:4412]                        |
| ANGPT1   | angiopoietin 1 [Source:HGNC Symbol;Acc:HGNC:484]                                               |
| ANGPT2   | angiopoietin 2 [Source:HGNC Symbol;Acc:HGNC:485]                                               |
| GRK5     | G protein-coupled receptor kinase 5 [Source:HGNC Symbol;Acc:HGNC:4544]                         |
| GDF2     | growth differentiation factor 2 [Source:HGNC Symbol;Acc:HGNC:4217]                             |
| FGF21    | fibroblast growth factor 21 [Source:HGNC Symbol;Acc:HGNC:3678]                                 |
| OPTC     | opticin [Source:HGNC Symbol;Acc:HGNC:8158]                                                     |
| FRK      | fyn related Src family tyrosine kinase [Source:HGNC Symbol;Acc:HGNC:3955]                      |
| PELI3    | pellino E3 ubiquitin protein ligase family member 3 [Source:HGNC Symbol;Acc:HGNC:30010]        |
| IL27     | interleukin 27 [Source:HGNC Symbol;Acc:HGNC:19157]                                             |
| MTOR     | mechanistic target of rapamycin [Source:HGNC Symbol;Acc:HGNC:3942]                             |
| G6PD     | glucose-6-phosphate dehydrogenase [Source:HGNC Symbol;Acc:HGNC:4057]                           |
| RNF19A   | ring finger protein 19A, RBR E3 ubiquitin protein ligase [Source:HGNC Symbol;Acc:HGNC:13432]   |
| MYRIP    | myosin VIIA and Rab interacting protein [Source:HGNC Symbol;Acc:HGNC:19156]                    |
| ASPM     | abnormal spindle microtubule assembly [Source:HGNC Symbol;Acc:HGNC:19048]                      |
| CHMP2B   | charged multivesicular body protein 2B [Source:HGNC Symbol;Acc:HGNC:24537]                     |
| PCDHGA12 | protocadherin gamma subfamily A, 12 [Source:HGNC Symbol;Acc:HGNC:8699]                         |
| POLDIP2  | polymerase (DNA) delta interacting protein 2 [Source:HGNC Symbol;Acc:HGNC:23781]               |
| PRPF31   | pre-mRNA processing factor 31 [Source:HGNC Symbol;Acc:HGNC:15446]                              |
| GPX3     | glutathione peroxidase 3 [Source:HGNC Symbol;Acc:HGNC:4555]                                    |
| NR2E3    | nuclear receptor subfamily 2 group E member 3 [Source:HGNC Symbol;Acc:HGNC:7974]               |
| ARIH2    | ariadne RBR E3 ubiquitin protein ligase 2 [Source:HGNC Symbol;Acc:HGNC:690]                    |
| MERTK    | MER proto-oncogene, tyrosine kinase [Source:HGNC Symbol;Acc:HGNC:7027]                         |
| NOP56    | NOP56 ribonucleoprotein [Source:HGNC Symbol;Acc:HGNC:15911]                                    |
| ATG7     | autophagy related 7 [Source:HGNC Symbol;Acc:HGNC:16935]                                        |
| CXCL13   | C-X-C motif chemokine ligand 13 [Source:HGNC Symbol;Acc:HGNC:10639]                            |
| AHSA1    | activator of Hsp90 ATPase activity 1 [Source:HGNC Symbol;Acc:HGNC:1189]                        |
| SLCO1B1  | solute carrier organic anion transporter family member 1B1 [Source:HGNC Symbol;Acc:HGNC:10959] |
| TXNIP    | thioredoxin interacting protein [Source:HGNC Symbol;Acc:HGNC:16952]                            |
| CGRRF1   | cell growth regulator with ring finger domain 1 [Source:HGNC Symbol;Acc:HGNC:15528]            |
| HSPH1    | heat shock protein family H (Hsp110) member 1 [Source:HGNC Symbol;Acc:HGNC:16969]              |
| CYP46A1  | cytochrome P450 family 46 subfamily A member 1 [Source:HGNC Symbol;Acc:HGNC:2641]              |
| GPR75    | G protein-coupled receptor 75 [Source:HGNC Symbol;Acc:HGNC:4526]                               |
| METAP2   | methionyl aminopeptidase 2 [Source:HGNC Symbol;Acc:HGNC:16672]                                 |
| SEMA3A   | semaphorin 3A [Source:HGNC Symbol;Acc:HGNC:10723]                                              |
| CACNG3   | calcium voltage-gated channel auxiliary subunit gamma 3 [Source:HGNC Symbol;Acc:HGNC:1407]     |

|         |                                                                                                    |
|---------|----------------------------------------------------------------------------------------------------|
| ABCA7   | ATP binding cassette subfamily A member 7 [Source:HGNC Symbol;Acc:HGNC:37]                         |
| TEC     | tec protein tyrosine kinase [Source:HGNC Symbol;Acc:HGNC:11719]                                    |
| CDH7    | cadherin 7 [Source:HGNC Symbol;Acc:HGNC:1766]                                                      |
| ABCB6   | ATP binding cassette subfamily B member 6 (Langereis blood group) [Source:HGNC Symbol;Acc:HGNC:47] |
| NR1H3   | nuclear receptor subfamily 1 group H member 3 [Source:HGNC Symbol;Acc:HGNC:7966]                   |
| LRPPRC  | leucine rich pentatricopeptide repeat containing [Source:HGNC Symbol;Acc:HGNC:15714]               |
| ATP6AP2 | ATPase H+ transporting accessory protein 2 [Source:HGNC Symbol;Acc:HGNC:18305]                     |
| TSHZ1   | teashirt zinc finger homeobox 1 [Source:HGNC Symbol;Acc:HGNC:10669]                                |
| CDKN1C  | cyclin dependent kinase inhibitor 1C [Source:HGNC Symbol;Acc:HGNC:1786]                            |
| CDKN2A  | cyclin dependent kinase inhibitor 2A [Source:HGNC Symbol;Acc:HGNC:1787]                            |
| CDKN2D  | cyclin dependent kinase inhibitor 2D [Source:HGNC Symbol;Acc:HGNC:1790]                            |
| KERA    | keratocan [Source:HGNC Symbol;Acc:HGNC:6309]                                                       |
| MAP4K1  | mitogen-activated protein kinase kinase kinase kinase 1 [Source:HGNC Symbol;Acc:HGNC:6863]         |
| CYP2C19 | cytochrome P450 family 2 subfamily C member 19 [Source:HGNC Symbol;Acc:HGNC:2621]                  |
| CYP24A1 | cytochrome P450 family 24 subfamily A member 1 [Source:HGNC Symbol;Acc:HGNC:2602]                  |
| NQO1    | NAD(P)H quinone dehydrogenase 1 [Source:HGNC Symbol;Acc:HGNC:2874]                                 |
| DMBT1   | deleted in malignant brain tumors 1 [Source:HGNC Symbol;Acc:HGNC:2926]                             |
| DMD     | dystrophin [Source:HGNC Symbol;Acc:HGNC:2928]                                                      |
| DMRT1   | doublesex and mab-3 related transcription factor 1 [Source:HGNC Symbol;Acc:HGNC:2934]              |
| DNASE1  | deoxyribonuclease I [Source:HGNC Symbol;Acc:HGNC:2956]                                             |
| AGT     | angiotensinogen [Source:HGNC Symbol;Acc:HGNC:333]                                                  |
| AGTR1   | angiotensin II receptor type 1 [Source:HGNC Symbol;Acc:HGNC:336]                                   |
| E2F2    | E2F transcription factor 2 [Source:HGNC Symbol;Acc:HGNC:3114]                                      |
| ECM1    | extracellular matrix protein 1 [Source:HGNC Symbol;Acc:HGNC:3153]                                  |
| EGF     | epidermal growth factor [Source:HGNC Symbol;Acc:HGNC:3229]                                         |
| CYP1A2  | cytochrome P450 family 1 subfamily A member 2 [Source:HGNC Symbol;Acc:HGNC:2596]                   |
| CTNNA1  | catenin alpha 1 [Source:HGNC Symbol;Acc:HGNC:2509]                                                 |
| MAPK14  | mitogen-activated protein kinase 14 [Source:HGNC Symbol;Acc:HGNC:6876]                             |
| FILIP1L | filamin A interacting protein 1 like [Source:HGNC Symbol;Acc:HGNC:24589]                           |
| CYP2R1  | cytochrome P450 family 2 subfamily R member 1 [Source:HGNC Symbol;Acc:HGNC:20580]                  |
| TDRD9   | tudor domain containing 9 [Source:HGNC Symbol;Acc:HGNC:20122]                                      |
| CCR1    | C-C motif chemokine receptor 1 [Source:HGNC Symbol;Acc:HGNC:1602]                                  |
| LTB4R   | leukotriene B4 receptor [Source:HGNC Symbol;Acc:HGNC:6713]                                         |
| CNR1    | cannabinoid receptor 1 (brain) [Source:HGNC Symbol;Acc:HGNC:2159]                                  |
| CNTF    | ciliary neurotrophic factor [Source:HGNC Symbol;Acc:HGNC:2169]                                     |
| RBM45   | RNA binding motif protein 45 [Source:HGNC Symbol;Acc:HGNC:24468]                                   |
| CRK     | v-crk avian sarcoma virus CT10 oncogene homolog [Source:HGNC Symbol;Acc:HGNC:2362]                 |
| CRYBB1  | crystallin beta B1 [Source:HGNC Symbol;Acc:HGNC:2397]                                              |
| CRYBB2  | crystallin beta B2 [Source:HGNC Symbol;Acc:HGNC:2398]                                              |
| PARP1   | poly(ADP-ribose) polymerase 1 [Source:HGNC Symbol;Acc:HGNC:270]                                    |

|          |                                                                                      |
|----------|--------------------------------------------------------------------------------------|
| DCP1B    | decapping mRNA 1B [Source:HGNC Symbol;Acc:HGNC:24451]                                |
| TBK1     | TANK binding kinase 1 [Source:HGNC Symbol;Acc:HGNC:11584]                            |
| CXCL9    | C-X-C motif chemokine ligand 9 [Source:HGNC Symbol;Acc:HGNC:7098]                    |
| MMP1     | matrix metalloproteinase 1 [Source:HGNC Symbol;Acc:HGNC:7155]                        |
| MMP3     | matrix metalloproteinase 3 [Source:HGNC Symbol;Acc:HGNC:7173]                        |
| MMP7     | matrix metalloproteinase 7 [Source:HGNC Symbol;Acc:HGNC:7174]                        |
| MMP13    | matrix metalloproteinase 13 [Source:HGNC Symbol;Acc:HGNC:7159]                       |
| MMP14    | matrix metalloproteinase 14 [Source:HGNC Symbol;Acc:HGNC:7160]                       |
| MNAT1    | MNAT1, CDK activating kinase assembly factor [Source:HGNC Symbol;Acc:HGNC:7181]      |
| CD200    | CD200 molecule [Source:HGNC Symbol;Acc:HGNC:7203]                                    |
| CTRB2    | chymotrypsinogen B2 [Source:HGNC Symbol;Acc:HGNC:2522]                               |
| MTTP     | microsomal triglyceride transfer protein [Source:HGNC Symbol;Acc:HGNC:7467]          |
| MYO7A    | myosin VIIA [Source:HGNC Symbol;Acc:HGNC:7606]                                       |
| MYOG     | myogenin [Source:HGNC Symbol;Acc:HGNC:7612]                                          |
| MGST1    | microsomal glutathione S-transferase 1 [Source:HGNC Symbol;Acc:HGNC:7061]            |
| MFGE8    | milk fat globule-EGF factor 8 protein [Source:HGNC Symbol;Acc:HGNC:7036]             |
| MDM2     | MDM2 proto-oncogene [Source:HGNC Symbol;Acc:HGNC:6973]                               |
| MAP2     | microtubule associated protein 2 [Source:HGNC Symbol;Acc:HGNC:6839]                  |
| NCAM1    | neural cell adhesion molecule 1 [Source:HGNC Symbol;Acc:HGNC:7656]                   |
| ACO1     | aconitase 1 [Source:HGNC Symbol;Acc:HGNC:117]                                        |
| PEX1     | peroxisomal biogenesis factor 1 [Source:HGNC Symbol;Acc:HGNC:8850]                   |
| SERPINA1 | serpin family A member 1 [Source:HGNC Symbol;Acc:HGNC:8941]                          |
| SERPINB8 | serpin family B member 8 [Source:HGNC Symbol;Acc:HGNC:8952]                          |
| IL17D    | interleukin 17D [Source:HGNC Symbol;Acc:HGNC:5984]                                   |
| PLCG2    | phospholipase C gamma 2 [Source:HGNC Symbol;Acc:HGNC:9066]                           |
| PLEK     | pleckstrin [Source:HGNC Symbol;Acc:HGNC:9070]                                        |
| PLTP     | phospholipid transfer protein [Source:HGNC Symbol;Acc:HGNC:9093]                     |
| BCO1     | beta-carotene oxygenase 1 [Source:HGNC Symbol;Acc:HGNC:13815]                        |
| TREM2    | triggering receptor expressed on myeloid cells 2 [Source:HGNC Symbol;Acc:HGNC:17761] |
| PON2     | paraoxonase 2 [Source:HGNC Symbol;Acc:HGNC:9205]                                     |
| DDIT4    | DNA damage inducible transcript 4 [Source:HGNC Symbol;Acc:HGNC:24944]                |
| PPARD    | peroxisome proliferator activated receptor delta [Source:HGNC Symbol;Acc:HGNC:9235]  |
| P4HTM    | prolyl 4-hydroxylase, transmembrane [Source:HGNC Symbol;Acc:HGNC:28858]              |
| RTEL1    | regulator of telomere elongation helicase 1 [Source:HGNC Symbol;Acc:HGNC:15888]      |
| GHRL     | ghrelin/obestatin prepropeptide [Source:HGNC Symbol;Acc:HGNC:18129]                  |
| IL23A    | interleukin 23 subunit alpha [Source:HGNC Symbol;Acc:HGNC:15488]                     |
| NGF      | nerve growth factor [Source:HGNC Symbol;Acc:HGNC:7808]                               |
| NOS2     | nitric oxide synthase 2 [Source:HGNC Symbol;Acc:HGNC:7873]                           |
| NPHP1    | nephrocystin 1 [Source:HGNC Symbol;Acc:HGNC:7905]                                    |
| SLC11A2  | solute carrier family 11 member 2 [Source:HGNC Symbol;Acc:HGNC:10908]                |
| P2RX4    | purinergic receptor P2X 4 [Source:HGNC Symbol;Acc:HGNC:8535]                         |

|          |                                                                                           |
|----------|-------------------------------------------------------------------------------------------|
| IL22     | interleukin 22 [Source:HGNC Symbol;Acc:HGNC:14900]                                        |
| RDH8     | retinol dehydrogenase 8 (all-trans) [Source:HGNC Symbol;Acc:HGNC:14423]                   |
| ADIPOR1  | adiponectin receptor 1 [Source:HGNC Symbol;Acc:HGNC:24040]                                |
| ANGPTL4  | angiopoietin like 4 [Source:HGNC Symbol;Acc:HGNC:16039]                                   |
| TLR7     | toll like receptor 7 [Source:HGNC Symbol;Acc:HGNC:15631]                                  |
| ZCWPW1   | zinc finger CW-type and PWWP domain containing 1 [Source:HGNC Symbol;Acc:HGNC:23486]      |
| PRSS50   | protease, serine 50 [Source:HGNC Symbol;Acc:HGNC:17910]                                   |
| XIAP     | X-linked inhibitor of apoptosis [Source:HGNC Symbol;Acc:HGNC:592]                         |
| HSPG2    | heparan sulfate proteoglycan 2 [Source:HGNC Symbol;Acc:HGNC:5273]                         |
| APOA1    | apolipoprotein A1 [Source:HGNC Symbol;Acc:HGNC:600]                                       |
| TNC      | tenascin C [Source:HGNC Symbol;Acc:HGNC:5318]                                             |
| ICAM1    | intercellular adhesion molecule 1 [Source:HGNC Symbol;Acc:HGNC:5344]                      |
| IFNG     | interferon, gamma [Source:HGNC Symbol;Acc:HGNC:5438]                                      |
| EYS      | eyes shut homolog (Drosophila) [Source:HGNC Symbol;Acc:HGNC:21555]                        |
| IGF1R    | insulin like growth factor 1 receptor [Source:HGNC Symbol;Acc:HGNC:5465]                  |
| APP      | amyloid beta precursor protein [Source:HGNC Symbol;Acc:HGNC:620]                          |
| IL1A     | interleukin 1 alpha [Source:HGNC Symbol;Acc:HGNC:5991]                                    |
| IL2      | interleukin 2 [Source:HGNC Symbol;Acc:HGNC:6001]                                          |
| IL2RA    | interleukin 2 receptor subunit alpha [Source:HGNC Symbol;Acc:HGNC:6008]                   |
| IL2RG    | interleukin 2 receptor subunit gamma [Source:HGNC Symbol;Acc:HGNC:6010]                   |
| HSPA4    | heat shock protein family A (Hsp70) member 4 [Source:HGNC Symbol;Acc:HGNC:5237]           |
| HSD11B1  | hydroxysteroid 11-beta dehydrogenase 1 [Source:HGNC Symbol;Acc:HGNC:5208]                 |
| HMOX1    | heme oxygenase 1 [Source:HGNC Symbol;Acc:HGNC:5013]                                       |
| CXCL1    | C-X-C motif chemokine ligand 1 [Source:HGNC Symbol;Acc:HGNC:4602]                         |
| GSR      | glutathione reductase [Source:HGNC Symbol;Acc:HGNC:4623]                                  |
| GSTM2    | glutathione S-transferase mu 2 (muscle) [Source:HGNC Symbol;Acc:HGNC:4634]                |
| GSTZ1    | glutathione S-transferase zeta 1 [Source:HGNC Symbol;Acc:HGNC:4643]                       |
| GTF2H4   | general transcription factor IIH subunit 4 [Source:HGNC Symbol;Acc:HGNC:4658]             |
| GUCA1A   | guanylate cyclase activator 1A [Source:HGNC Symbol;Acc:HGNC:4678]                         |
| ICOS     | inducible T-cell costimulator [Source:HGNC Symbol;Acc:HGNC:5351]                          |
| VSX1     | visual system homeobox 1 [Source:HGNC Symbol;Acc:HGNC:12723]                              |
| HLA-A    | major histocompatibility complex, class I, A [Source:HGNC Symbol;Acc:HGNC:4931]           |
| HLA-DPB1 | major histocompatibility complex, class II, DP beta 1 [Source:HGNC Symbol;Acc:HGNC:4940]  |
| HLA-DQA1 | major histocompatibility complex, class II, DQ alpha 1 [Source:HGNC Symbol;Acc:HGNC:4942] |
| HLA-DRB1 | major histocompatibility complex, class II, DR beta 1 [Source:HGNC Symbol;Acc:HGNC:4948]  |
| HMGB1    | high mobility group box 1 [Source:HGNC Symbol;Acc:HGNC:4983]                              |
| IL6ST    | interleukin 6 signal transducer [Source:HGNC Symbol;Acc:HGNC:6021]                        |
| AQP1     | aquaporin 1 (Colton blood group) [Source:HGNC Symbol;Acc:HGNC:633]                        |
| LCN2     | lipocalin 2 [Source:HGNC Symbol;Acc:HGNC:6526]                                            |
| LGALS1   | galectin 1 [Source:HGNC Symbol;Acc:HGNC:6561]                                             |
| FADS1    | fatty acid desaturase 1 [Source:HGNC Symbol;Acc:HGNC:3574]                                |

|         |                                                                                                                              |
|---------|------------------------------------------------------------------------------------------------------------------------------|
| LOXL1   | lysyl oxidase like 1 [Source:HGNC Symbol;Acc:HGNC:6665]                                                                      |
| LPA     | lipoprotein(a) [Source:HGNC Symbol;Acc:HGNC:6667]                                                                            |
| LRP5    | LDL receptor related protein 5 [Source:HGNC Symbol;Acc:HGNC:6697]                                                            |
| ARNT    | aryl hydrocarbon receptor nuclear translocator [Source:HGNC Symbol;Acc:HGNC:700]                                             |
| LCN9    | lipocalin 9 [Source:HGNC Symbol;Acc:HGNC:17442]                                                                              |
| LAMP2   | lysosomal associated membrane protein 2 [Source:HGNC Symbol;Acc:HGNC:6501]                                                   |
| LAMA3   | laminin subunit alpha 3 [Source:HGNC Symbol;Acc:HGNC:6483]                                                                   |
| IL13    | interleukin 13 [Source:HGNC Symbol;Acc:HGNC:5973]                                                                            |
| IL15    | interleukin 15 [Source:HGNC Symbol;Acc:HGNC:5977]                                                                            |
| IMPDH1  | IMP (inosine 5'-monophosphate) dehydrogenase 1 [Source:HGNC Symbol;Acc:HGNC:6052]                                            |
| ISG20   | interferon stimulated exonuclease gene 20 [Source:HGNC Symbol;Acc:HGNC:6130]                                                 |
| ITGAM   | integrin subunit alpha M [Source:HGNC Symbol;Acc:HGNC:6149]                                                                  |
| MIA3    | melanoma inhibitory activity family member 3 [Source:HGNC Symbol;Acc:HGNC:24008]                                             |
| CA13    | carbonic anhydrase 13 [Source:HGNC Symbol;Acc:HGNC:14914]                                                                    |
| KIR2DS1 | killer cell immunoglobulin like receptor, two Ig domains and short cytoplasmic tail 1<br>[Source:HGNC Symbol;Acc:HGNC:6333]  |
| KIR3DL1 | killer cell immunoglobulin like receptor, three Ig domains and long cytoplasmic tail 1<br>[Source:HGNC Symbol;Acc:HGNC:6338] |
| KIR3DL2 | killer cell immunoglobulin like receptor, three Ig domains and long cytoplasmic tail 2<br>[Source:HGNC Symbol;Acc:HGNC:6339] |
| KRT8    | keratin 8 [Source:HGNC Symbol;Acc:HGNC:6446]                                                                                 |
| ACAT2   | acetyl-CoA acetyltransferase 2 [Source:HGNC Symbol;Acc:HGNC:94]                                                              |
| ADAMTS9 | ADAM metalloproteinase with thrombospondin type 1 motif 9 [Source:HGNC<br>Symbol;Acc:HGNC:13202]                             |
| A2M     | alpha-2-macroglobulin [Source:HGNC Symbol;Acc:HGNC:7]                                                                        |
| ABCA10  | ATP binding cassette subfamily A member 10 [Source:HGNC Symbol;Acc:HGNC:30]                                                  |
| ABCA12  | ATP binding cassette subfamily A member 12 [Source:HGNC Symbol;Acc:HGNC:14637]                                               |
| ABCA13  | ATP binding cassette subfamily A member 13 [Source:HGNC Symbol;Acc:HGNC:14638]                                               |
| ABCA2   | ATP binding cassette subfamily A member 2 [Source:HGNC Symbol;Acc:HGNC:32]                                                   |
| ABCA3   | ATP binding cassette subfamily A member 3 [Source:HGNC Symbol;Acc:HGNC:33]                                                   |
| ABCA5   | ATP binding cassette subfamily A member 5 [Source:HGNC Symbol;Acc:HGNC:35]                                                   |
| ABCA6   | ATP binding cassette subfamily A member 6 [Source:HGNC Symbol;Acc:HGNC:36]                                                   |
| ABCB1   | ATP binding cassette subfamily B member 1 [Source:HGNC Symbol;Acc:HGNC:40]                                                   |
| ABCC5   | ATP binding cassette subfamily C member 5 [Source:HGNC Symbol;Acc:HGNC:56]                                                   |
| ABCG5   | ATP binding cassette subfamily G member 5 [Source:HGNC Symbol;Acc:HGNC:13886]                                                |
| ABCG8   | ATP binding cassette subfamily G member 8 [Source:HGNC Symbol;Acc:HGNC:13887]                                                |
| ACAN    | aggrecan [Source:HGNC Symbol;Acc:HGNC:319]                                                                                   |
| ACKR1   | atypical chemokine receptor 1 (Duffy blood group) [Source:HGNC Symbol;Acc:HGNC:4035]                                         |
| ACTG1   | actin gamma 1 [Source:HGNC Symbol;Acc:HGNC:144]                                                                              |
| ADI1    | acireductone dioxygenase 1 [Source:HGNC Symbol;Acc:HGNC:30576]                                                               |
| ADORA1  | adenosine A1 receptor [Source:HGNC Symbol;Acc:HGNC:262]                                                                      |
| ADORA2A | adenosine A2a receptor [Source:HGNC Symbol;Acc:HGNC:263]                                                                     |
| ADORA2B | adenosine A2b receptor [Source:HGNC Symbol;Acc:HGNC:264]                                                                     |

|          |                                                                                                                   |
|----------|-------------------------------------------------------------------------------------------------------------------|
| ADORA3   | adenosine A3 receptor [Source:HGNC Symbol;Acc:HGNC:268]                                                           |
| ADRB2    | adrenoceptor beta 2 [Source:HGNC Symbol;Acc:HGNC:286]                                                             |
| AGBL1    | ATP/GTP binding protein-like 1 [Source:HGNC Symbol;Acc:HGNC:26504]                                                |
| AGBL3    | ATP/GTP binding protein-like 3 [Source:HGNC Symbol;Acc:HGNC:27981]                                                |
| AGO2     | argonaute 2, RISC catalytic component [Source:HGNC Symbol;Acc:HGNC:3263]                                          |
| AIM2     | absent in melanoma 2 [Source:HGNC Symbol;Acc:HGNC:357]                                                            |
| AIPL1    | aryl hydrocarbon receptor interacting protein like 1 [Source:HGNC Symbol;Acc:HGNC:359]                            |
| AKR1B1   | aldo-keto reductase family 1 member B [Source:HGNC Symbol;Acc:HGNC:381]                                           |
| AKT1     | AKT serine/threonine kinase 1 [Source:HGNC Symbol;Acc:HGNC:391]                                                   |
| ALDH2    | aldehyde dehydrogenase 2 family (mitochondrial) [Source:HGNC Symbol;Acc:HGNC:404]                                 |
| ALOX15   | arachidonate 15-lipoxygenase [Source:HGNC Symbol;Acc:HGNC:433]                                                    |
| ANXA2    | annexin A2 [Source:HGNC Symbol;Acc:HGNC:537]                                                                      |
| ANXA5    | annexin A5 [Source:HGNC Symbol;Acc:HGNC:543]                                                                      |
| ANXA8    | annexin A8 [Source:HGNC Symbol;Acc:HGNC:546]                                                                      |
| AP5M1    | adaptor related protein complex 5 mu 1 subunit [Source:HGNC Symbol;Acc:HGNC:20192]                                |
| APCS     | amyloid P component, serum [Source:HGNC Symbol;Acc:HGNC:584]                                                      |
| APOA2    | apolipoprotein A2 [Source:HGNC Symbol;Acc:HGNC:601]                                                               |
| APOC1    | apolipoprotein C1 [Source:HGNC Symbol;Acc:HGNC:607]                                                               |
| APOC2    | apolipoprotein C2 [Source:HGNC Symbol;Acc:HGNC:609]                                                               |
| APOC3    | apolipoprotein C3 [Source:HGNC Symbol;Acc:HGNC:610]                                                               |
| APOC4    | apolipoprotein C4 [Source:HGNC Symbol;Acc:HGNC:611]                                                               |
| AQP4     | aquaporin 4 [Source:HGNC Symbol;Acc:HGNC:637]                                                                     |
| ARID3A   | AT-rich interaction domain 3A [Source:HGNC Symbol;Acc:HGNC:3031]                                                  |
| ARR3     | arrestin 3 retinal (X-arrestin) [Source:HGNC Symbol;Acc:HGNC:710]                                                 |
| ASCL1    | achaete-scute family bHLH transcription factor 1 [Source:HGNC Symbol;Acc:HGNC:738]                                |
| ATF4     | activating transcription factor 4 [Source:HGNC Symbol;Acc:HGNC:786]                                               |
| ATF6     | activating transcription factor 6 [Source:HGNC Symbol;Acc:HGNC:791]                                               |
| ATG12    | autophagy related 12 [Source:HGNC Symbol;Acc:HGNC:588]                                                            |
| ATG5     | autophagy related 5 [Source:HGNC Symbol;Acc:HGNC:589]                                                             |
| ATOH7    | atonal bHLH transcription factor 7 [Source:HGNC Symbol;Acc:HGNC:13907]                                            |
| ATP12A   | ATPase H <sup>+</sup> /K <sup>+</sup> transporting non-gastric alpha2 subunit [Source:HGNC Symbol;Acc:HGNC:13816] |
| ATP4A    | ATPase H <sup>+</sup> /K <sup>+</sup> transporting alpha subunit [Source:HGNC Symbol;Acc:HGNC:819]                |
| ATRAID   | all-trans retinoic acid induced differentiation factor [Source:HGNC Symbol;Acc:HGNC:24090]                        |
| ATXN2    | ataxin 2 [Source:HGNC Symbol;Acc:HGNC:10555]                                                                      |
| AXL      | AXL receptor tyrosine kinase [Source:HGNC Symbol;Acc:HGNC:905]                                                    |
| B2M      | beta-2-microglobulin [Source:HGNC Symbol;Acc:HGNC:914]                                                            |
| BACE1    | beta-secretase 1 [Source:HGNC Symbol;Acc:HGNC:933]                                                                |
| BAHCC1   | BAH domain and coiled-coil containing 1 [Source:HGNC Symbol;Acc:HGNC:29279]                                       |
| BAIAP2L2 | BAI1 associated protein 2 like 2 [Source:HGNC Symbol;Acc:HGNC:26203]                                              |
| BBS1     | Bardet-Biedl syndrome 1 [Source:HGNC Symbol;Acc:HGNC:966]                                                         |
| BCAM     | basal cell adhesion molecule (Lutheran blood group) [Source:HGNC Symbol;Acc:HGNC:6722]                            |

|          |                                                                                                   |
|----------|---------------------------------------------------------------------------------------------------|
| BCL2L1   | BCL2 like 1 [Source:HGNC Symbol;Acc:HGNC:992]                                                     |
| BCO2     | beta-carotene oxygenase 2 [Source:HGNC Symbol;Acc:HGNC:18503]                                     |
| BECN1    | beclin 1 [Source:HGNC Symbol;Acc:HGNC:1034]                                                       |
| BFSP1    | beaded filament structural protein 1 [Source:HGNC Symbol;Acc:HGNC:1040]                           |
| BGN      | biglycan [Source:HGNC Symbol;Acc:HGNC:1044]                                                       |
| BMP1     | bone morphogenetic protein 1 [Source:HGNC Symbol;Acc:HGNC:1067]                                   |
| BMP7     | bone morphogenetic protein 7 [Source:HGNC Symbol;Acc:HGNC:1074]                                   |
| BMP8B    | bone morphogenetic protein 8b [Source:HGNC Symbol;Acc:HGNC:1075]                                  |
| BRAP     | BRCA1 associated protein [Source:HGNC Symbol;Acc:HGNC:1099]                                       |
| BRCA1    | BRCA1, DNA repair associated [Source:HGNC Symbol;Acc:HGNC:1100]                                   |
| BSG      | basigin (Ok blood group) [Source:HGNC Symbol;Acc:HGNC:1116]                                       |
| BSN      | bassoon presynaptic cytomatrix protein [Source:HGNC Symbol;Acc:HGNC:1117]                         |
| C18orf8  | chromosome 18 open reading frame 8 [Source:HGNC Symbol;Acc:HGNC:24326]                            |
| C1QA     | complement component 1, q subcomponent, A chain [Source:HGNC Symbol;Acc:HGNC:1241]                |
| C1QB     | complement component 1, q subcomponent, B chain [Source:HGNC Symbol;Acc:HGNC:1242]                |
| C1QC     | complement component 1, q subcomponent, C chain [Source:HGNC Symbol;Acc:HGNC:1245]                |
| C1R      | complement C1r subcomponent [Source:HGNC Symbol;Acc:HGNC:1246]                                    |
| C1RL     | complement C1r subcomponent like [Source:HGNC Symbol;Acc:HGNC:21265]                              |
| C1S      | complement component 1, s subcomponent [Source:HGNC Symbol;Acc:HGNC:1247]                         |
| C20orf85 | chromosome 20 open reading frame 85 [Source:HGNC Symbol;Acc:HGNC:16216]                           |
| C2orf71  | chromosome 2 open reading frame 71 [Source:HGNC Symbol;Acc:HGNC:34383]                            |
| C4B      | complement component 4B (Chido blood group) [Source:HGNC Symbol;Acc:HGNC:1324]                    |
| C5AR1    | complement component 5a receptor 1 [Source:HGNC Symbol;Acc:HGNC:1338]                             |
| C5AR2    | complement component 5a receptor 2 [Source:HGNC Symbol;Acc:HGNC:4527]                             |
| C7orf61  | chromosome 7 open reading frame 61 [Source:HGNC Symbol;Acc:HGNC:22135]                            |
| C8B      | complement component 8, beta polypeptide [Source:HGNC Symbol;Acc:HGNC:1353]                       |
| CA4      | carbonic anhydrase 4 [Source:HGNC Symbol;Acc:HGNC:1375]                                           |
| CACNA1F  | calcium voltage-gated channel subunit alpha1 F [Source:HGNC Symbol;Acc:HGNC:1393]                 |
| CACNA2D4 | calcium voltage-gated channel auxiliary subunit alpha2delta 4 [Source:HGNC Symbol;Acc:HGNC:20202] |
| CALB1    | calbindin 1 [Source:HGNC Symbol;Acc:HGNC:1434]                                                    |
| CALB2    | calbindin 2 [Source:HGNC Symbol;Acc:HGNC:1435]                                                    |
| CAPN2    | calpain 2 [Source:HGNC Symbol;Acc:HGNC:1479]                                                      |
| CASP2    | caspase 2 [Source:HGNC Symbol;Acc:HGNC:1503]                                                      |
| CASP3    | caspase 3 [Source:HGNC Symbol;Acc:HGNC:1504]                                                      |
| CASP4    | caspase 4 [Source:HGNC Symbol;Acc:HGNC:1505]                                                      |
| CASP6    | caspase 6 [Source:HGNC Symbol;Acc:HGNC:1507]                                                      |
| CASP9    | caspase 9 [Source:HGNC Symbol;Acc:HGNC:1511]                                                      |
| CATSPERD | cation channel sperm associated auxiliary subunit delta [Source:HGNC Symbol;Acc:HGNC:28598]       |
| CAV2     | caveolin 2 [Source:HGNC Symbol;Acc:HGNC:1528]                                                     |
| CBSL     | cystathionine-beta-synthase like [Source:HGNC Symbol;Acc:HGNC:51829]                              |



|          |                                                                                        |
|----------|----------------------------------------------------------------------------------------|
| CCDC109B | coiled-coil domain containing 109B [Source:HGNC Symbol;Acc:HGNC:26076]                 |
| CCDC172  | coiled-coil domain containing 172 [Source:HGNC Symbol;Acc:HGNC:30524]                  |
| CCDC96   | coiled-coil domain containing 96 [Source:HGNC Symbol;Acc:HGNC:26900]                   |
| CCL24    | C-C motif chemokine ligand 24 [Source:HGNC Symbol;Acc:HGNC:10623]                      |
| CCL26    | C-C motif chemokine ligand 26 [Source:HGNC Symbol;Acc:HGNC:10625]                      |
| CCL3     | C-C motif chemokine ligand 3 [Source:HGNC Symbol;Acc:HGNC:10627]                       |
| CCL4     | C-C motif chemokine ligand 4 [Source:HGNC Symbol;Acc:HGNC:10630]                       |
| CCL5     | C-C motif chemokine ligand 5 [Source:HGNC Symbol;Acc:HGNC:10632]                       |
| CCL7     | C-C motif chemokine ligand 7 [Source:HGNC Symbol;Acc:HGNC:10634]                       |
| CCND1    | cyclin D1 [Source:HGNC Symbol;Acc:HGNC:1582]                                           |
| CCR5     | C-C motif chemokine receptor 5 (gene/pseudogene) [Source:HGNC Symbol;Acc:HGNC:1606]    |
| CD163    | CD163 molecule [Source:HGNC Symbol;Acc:HGNC:1631]                                      |
| CD19     | CD19 molecule [Source:HGNC Symbol;Acc:HGNC:1633]                                       |
| CD200R1  | CD200 receptor 1 [Source:HGNC Symbol;Acc:HGNC:24235]                                   |
| CD4      | CD4 molecule [Source:HGNC Symbol;Acc:HGNC:1678]                                        |
| CD44     | CD44 molecule (Indian blood group) [Source:HGNC Symbol;Acc:HGNC:1681]                  |
| CD47     | CD47 molecule [Source:HGNC Symbol;Acc:HGNC:1682]                                       |
| CD63     | CD63 molecule [Source:HGNC Symbol;Acc:HGNC:1692]                                       |
| CD68     | CD68 molecule [Source:HGNC Symbol;Acc:HGNC:1693]                                       |
| CD81     | CD81 molecule [Source:HGNC Symbol;Acc:HGNC:1701]                                       |
| CD8A     | CD8a molecule [Source:HGNC Symbol;Acc:HGNC:1706]                                       |
| CDC42    | cell division cycle 42 [Source:HGNC Symbol;Acc:HGNC:1736]                              |
| CDH1     | cadherin 1 [Source:HGNC Symbol;Acc:HGNC:1748]                                          |
| CDH17    | cadherin 17 [Source:HGNC Symbol;Acc:HGNC:1756]                                         |
| CDH2     | cadherin 2 [Source:HGNC Symbol;Acc:HGNC:1759]                                          |
| CDH23    | cadherin related 23 [Source:HGNC Symbol;Acc:HGNC:13733]                                |
| CDH5     | cadherin 5 [Source:HGNC Symbol;Acc:HGNC:1764]                                          |
| CDKN1A   | cyclin dependent kinase inhibitor 1A [Source:HGNC Symbol;Acc:HGNC:1784]                |
| CEP290   | centrosomal protein 290 [Source:HGNC Symbol;Acc:HGNC:29021]                            |
| CERKL    | ceramide kinase like [Source:HGNC Symbol;Acc:HGNC:21699]                               |
| CFDP1    | craniofacial development protein 1 [Source:HGNC Symbol;Acc:HGNC:1873]                  |
| CFTR     | cystic fibrosis transmembrane conductance regulator [Source:HGNC Symbol;Acc:HGNC:1884] |
| CHM      | CHM, Rab escort protein 1 [Source:HGNC Symbol;Acc:HGNC:1940]                           |
| CHMP7    | charged multivesicular body protein 7 [Source:HGNC Symbol;Acc:HGNC:28439]              |
| CLDN19   | claudin 19 [Source:HGNC Symbol;Acc:HGNC:2040]                                          |
| CLDN5    | claudin 5 [Source:HGNC Symbol;Acc:HGNC:2047]                                           |
| CLPTM1   | CLPTM1, transmembrane protein [Source:HGNC Symbol;Acc:HGNC:2087]                       |
| CLRN1    | clarin 1 [Source:HGNC Symbol;Acc:HGNC:12605]                                           |
| CMSS1    | cms1 ribosomal small subunit homolog (yeast) [Source:HGNC Symbol;Acc:HGNC:28666]       |
| CNGA1    | cyclic nucleotide gated channel alpha 1 [Source:HGNC Symbol;Acc:HGNC:2148]             |
| CNGA3    | cyclic nucleotide gated channel alpha 3 [Source:HGNC Symbol;Acc:HGNC:2150]             |

|         |                                                                                              |
|---------|----------------------------------------------------------------------------------------------|
| CNGB1   | cyclic nucleotide gated channel beta 1 [Source:HGNC Symbol;Acc:HGNC:2151]                    |
| COL11A1 | collagen type XI alpha 1 chain [Source:HGNC Symbol;Acc:HGNC:2186]                            |
| COL15A1 | collagen type XV alpha 1 chain [Source:HGNC Symbol;Acc:HGNC:2192]                            |
| COL1A1  | collagen type I alpha 1 [Source:HGNC Symbol;Acc:HGNC:2197]                                   |
| COL4A1  | collagen type IV alpha 1 chain [Source:HGNC Symbol;Acc:HGNC:2202]                            |
| COL4A2  | collagen type IV alpha 2 [Source:HGNC Symbol;Acc:HGNC:2203]                                  |
| COL4A4  | collagen type IV alpha 4 chain [Source:HGNC Symbol;Acc:HGNC:2206]                            |
| COL6A2  | collagen type VI alpha 2 [Source:HGNC Symbol;Acc:HGNC:2212]                                  |
| COL8A2  | collagen type VIII alpha 2 [Source:HGNC Symbol;Acc:HGNC:2216]                                |
| COLEC11 | collectin subfamily member 11 [Source:HGNC Symbol;Acc:HGNC:17213]                            |
| CR1     | complement component 3b/4b receptor 1 (Knops blood group) [Source:HGNC Symbol;Acc:HGNC:2334] |
| CREB1   | cAMP responsive element binding protein 1 [Source:HGNC Symbol;Acc:HGNC:2345]                 |
| CRYAA   | crystallin alpha A [Source:HGNC Symbol;Acc:HGNC:2388]                                        |
| CRYBA1  | crystallin beta A1 [Source:HGNC Symbol;Acc:HGNC:2394]                                        |
| CRYGB   | crystallin gamma B [Source:HGNC Symbol;Acc:HGNC:2409]                                        |
| CRYGC   | crystallin gamma C [Source:HGNC Symbol;Acc:HGNC:2410]                                        |
| CRYGN   | crystallin gamma N [Source:HGNC Symbol;Acc:HGNC:20458]                                       |
| CRYGS   | crystallin gamma S [Source:HGNC Symbol;Acc:HGNC:2417]                                        |
| CSF1R   | colony stimulating factor 1 receptor [Source:HGNC Symbol;Acc:HGNC:2433]                      |
| CSF2    | colony stimulating factor 2 [Source:HGNC Symbol;Acc:HGNC:2434]                               |
| CSF3    | colony stimulating factor 3 [Source:HGNC Symbol;Acc:HGNC:2438]                               |
| CTBP2   | C-terminal binding protein 2 [Source:HGNC Symbol;Acc:HGNC:2495]                              |
| CTGF    | connective tissue growth factor [Source:HGNC Symbol;Acc:HGNC:2500]                           |
| CTLA4   | cytotoxic T-lymphocyte associated protein 4 [Source:HGNC Symbol;Acc:HGNC:2505]               |
| CTRL    | chymotrypsin like [Source:HGNC Symbol;Acc:HGNC:2524]                                         |
| CTSB    | cathepsin B [Source:HGNC Symbol;Acc:HGNC:2527]                                               |
| CTSD    | cathepsin D [Source:HGNC Symbol;Acc:HGNC:2529]                                               |
| CTSL    | cathepsin L [Source:HGNC Symbol;Acc:HGNC:2537]                                               |
| CUL3    | cullin 3 [Source:HGNC Symbol;Acc:HGNC:2553]                                                  |
| CYBA    | cytochrome b-245 alpha chain [Source:HGNC Symbol;Acc:HGNC:2577]                              |
| CYBB    | cytochrome b-245 beta chain [Source:HGNC Symbol;Acc:HGNC:2578]                               |
| CYCS    | cytochrome c, somatic [Source:HGNC Symbol;Acc:HGNC:19986]                                    |
| CYP1B1  | cytochrome P450 family 1 subfamily B member 1 [Source:HGNC Symbol;Acc:HGNC:2597]             |
| CYP2C9  | cytochrome P450 family 2 subfamily C member 9 [Source:HGNC Symbol;Acc:HGNC:2623]             |
| CYP4V2  | cytochrome P450 family 4 subfamily V member 2 [Source:HGNC Symbol;Acc:HGNC:23198]            |
| DAB2    | DAB2, clathrin adaptor protein [Source:HGNC Symbol;Acc:HGNC:2662]                            |
| DCN     | decorin [Source:HGNC Symbol;Acc:HGNC:2705]                                                   |
| DCT     | dopachrome tautomerase [Source:HGNC Symbol;Acc:HGNC:2709]                                    |
| DDIT3   | DNA damage inducible transcript 3 [Source:HGNC Symbol;Acc:HGNC:2726]                         |
| DDR1    | discoidin domain receptor tyrosine kinase 1 [Source:HGNC Symbol;Acc:HGNC:2730]               |
| DDX58   | DEXD/H-box helicase 58 [Source:HGNC Symbol;Acc:HGNC:19102]                                   |

|                   |                                                                                              |
|-------------------|----------------------------------------------------------------------------------------------|
| DEGS1             | delta(4)-desaturase, sphingolipid 1 [Source:HGNC Symbol;Acc:HGNC:13709]                      |
| WHRN              | whirlin [Source:HGNC Symbol;Acc:HGNC:16361]                                                  |
| DGCR8             | DGCR8 microprocessor complex subunit [Source:HGNC Symbol;Acc:HGNC:2847]                      |
| DLG4              | discs large MAGUK scaffold protein 4 [Source:HGNC Symbol;Acc:HGNC:2903]                      |
| DLL4              | delta like canonical Notch ligand 4 [Source:HGNC Symbol;Acc:HGNC:2910]                       |
| DNMT1             | DNA (cytosine-5-)-methyltransferase 1 [Source:HGNC Symbol;Acc:HGNC:2976]                     |
| DNTT              | DNA nucleotidylexotransferase [Source:HGNC Symbol;Acc:HGNC:2983]                             |
| DROSHA            | drosha ribonuclease III [Source:HGNC Symbol;Acc:HGNC:17904]                                  |
| DUOX1             | dual oxidase 1 [Source:HGNC Symbol;Acc:HGNC:3062]                                            |
| DUS3L             | dihydrouridine synthase 3 like [Source:HGNC Symbol;Acc:HGNC:26920]                           |
| EDN1              | endothelin 1 [Source:HGNC Symbol;Acc:HGNC:3176]                                              |
| EDN2              | endothelin 2 [Source:HGNC Symbol;Acc:HGNC:3177]                                              |
| EFNB2             | ephrin B2 [Source:HGNC Symbol;Acc:HGNC:3227]                                                 |
| EGFR              | epidermal growth factor receptor [Source:HGNC Symbol;Acc:HGNC:3236]                          |
| EGR1              | early growth response 1 [Source:HGNC Symbol;Acc:HGNC:3238]                                   |
| EIF2AK3           | eukaryotic translation initiation factor 2 alpha kinase 3 [Source:HGNC Symbol;Acc:HGNC:3255] |
| EIF2S1            | eukaryotic translation initiation factor 2 subunit alpha [Source:HGNC Symbol;Acc:HGNC:3265]  |
| ELANE             | elastase, neutrophil expressed [Source:HGNC Symbol;Acc:HGNC:3309]                            |
| ELOVL1            | ELOVL fatty acid elongase 1 [Source:HGNC Symbol;Acc:HGNC:14418]                              |
| ELOVL2            | ELOVL fatty acid elongase 2 [Source:HGNC Symbol;Acc:HGNC:14416]                              |
| ELOVL5            | ELOVL fatty acid elongase 5 [Source:HGNC Symbol;Acc:HGNC:21308]                              |
| EMC1              | ER membrane protein complex subunit 1 [Source:HGNC Symbol;Acc:HGNC:28957]                    |
| ENG               | endoglin [Source:HGNC Symbol;Acc:HGNC:3349]                                                  |
| ENO1              | enolase 1 [Source:HGNC Symbol;Acc:HGNC:3350]                                                 |
| CBS               | cystathionine-beta-synthase [Source:HGNC Symbol;Acc:HGNC:1550]                               |
| XXbac-BPG246D15.9 |                                                                                              |
| XXbac-BPG116M5.17 |                                                                                              |
| RP11-330H6.5      |                                                                                              |
| RP11-566K11.2     |                                                                                              |
| OPN1MW3           | opsin 1 (cone pigments), medium-wave-sensitive 3 [Source:HGNC Symbol;Acc:HGNC:51831]         |
| OPN1MW            | opsin 1 (cone pigments), medium-wave-sensitive [Source:HGNC Symbol;Acc:HGNC:4206]            |
| TBC1D3I           | TBC1 domain family member 3I [Source:HGNC Symbol;Acc:HGNC:32709]                             |
| EPHA2             | EPH receptor A2 [Source:HGNC Symbol;Acc:HGNC:3386]                                           |
| ERBB2             | erb-b2 receptor tyrosine kinase 2 [Source:HGNC Symbol;Acc:HGNC:3430]                         |
| ERMN              | ermin [Source:HGNC Symbol;Acc:HGNC:29208]                                                    |
| ERN1              | endoplasmic reticulum to nucleus signaling 1 [Source:HGNC Symbol;Acc:HGNC:3449]              |
| ERP29             | endoplasmic reticulum protein 29 [Source:HGNC Symbol;Acc:HGNC:13799]                         |
| F13B              | coagulation factor XIII B chain [Source:HGNC Symbol;Acc:HGNC:3534]                           |
| FAM161A           | family with sequence similarity 161 member A [Source:HGNC Symbol;Acc:HGNC:25808]             |
| FASLG             | Fas ligand [Source:HGNC Symbol;Acc:HGNC:11936]                                               |
| FBLN1             | fibulin 1 [Source:HGNC Symbol;Acc:HGNC:3600]                                                 |

|         |                                                                                            |
|---------|--------------------------------------------------------------------------------------------|
| FBLN2   | fibulin 2 [Source:HGNC Symbol;Acc:HGNC:3601]                                               |
| FBLN7   | fibulin 7 [Source:HGNC Symbol;Acc:HGNC:26740]                                              |
| FBN1    | fibrillin 1 [Source:HGNC Symbol;Acc:HGNC:3603]                                             |
| FCGR1A  | Fc fragment of IgG receptor Ia [Source:HGNC Symbol;Acc:HGNC:3613]                          |
| FCGR2B  | Fc fragment of IgG receptor IIb [Source:HGNC Symbol;Acc:HGNC:3618]                         |
| FCGRT   | Fc fragment of IgG receptor and transporter [Source:HGNC Symbol;Acc:HGNC:3621]             |
| FCN1    | ficolin 1 [Source:HGNC Symbol;Acc:HGNC:3623]                                               |
| FCN3    | ficolin 3 [Source:HGNC Symbol;Acc:HGNC:3625]                                               |
| FGF1    | fibroblast growth factor 1 [Source:HGNC Symbol;Acc:HGNC:3665]                              |
| FGF13   | fibroblast growth factor 13 [Source:HGNC Symbol;Acc:HGNC:3670]                             |
| FGF5    | fibroblast growth factor 5 [Source:HGNC Symbol;Acc:HGNC:3683]                              |
| FOLH1   | folate hydrolase (prostate-specific membrane antigen) 1 [Source:HGNC Symbol;Acc:HGNC:3788] |
| FOS     | Fos proto-oncogene, AP-1 transcription factor subunit [Source:HGNC Symbol;Acc:HGNC:3796]   |
| FOXC1   | forkhead box C1 [Source:HGNC Symbol;Acc:HGNC:3800]                                         |
| FOXO1   | forkhead box O1 [Source:HGNC Symbol;Acc:HGNC:3819]                                         |
| FOXO3   | forkhead box O3 [Source:HGNC Symbol;Acc:HGNC:3821]                                         |
| FTO     | fat mass and obesity associated [Source:HGNC Symbol;Acc:HGNC:24678]                        |
| FURIN   | furin, paired basic amino acid cleaving enzyme [Source:HGNC Symbol;Acc:HGNC:8568]          |
| FUT3    | fucosyltransferase 3 (Lewis blood group) [Source:HGNC Symbol;Acc:HGNC:4014]                |
| FUT5    | fucosyltransferase 5 [Source:HGNC Symbol;Acc:HGNC:4016]                                    |
| FYB     | FYN binding protein [Source:HGNC Symbol;Acc:HGNC:4036]                                     |
| GADD45G | growth arrest and DNA damage inducible gamma [Source:HGNC Symbol;Acc:HGNC:4097]            |
| GAPDH   | glyceraldehyde-3-phosphate dehydrogenase [Source:HGNC Symbol;Acc:HGNC:4141]                |
| GDNF    | glial cell derived neurotrophic factor [Source:HGNC Symbol;Acc:HGNC:4232]                  |
| GFAP    | glial fibrillary acidic protein [Source:HGNC Symbol;Acc:HGNC:4235]                         |
| GJA1    | gap junction protein alpha 1 [Source:HGNC Symbol;Acc:HGNC:4274]                            |
| GJD2    | gap junction protein delta 2 [Source:HGNC Symbol;Acc:HGNC:19154]                           |
| GLIS1   | GLIS family zinc finger 1 [Source:HGNC Symbol;Acc:HGNC:29525]                              |
| GLUL    | glutamate-ammonia ligase [Source:HGNC Symbol;Acc:HGNC:4341]                                |
| GNAT1   | G protein subunit alpha transducin 1 [Source:HGNC Symbol;Acc:HGNC:4393]                    |
| GNAT2   | G protein subunit alpha transducin 2 [Source:HGNC Symbol;Acc:HGNC:4394]                    |
| GPR143  | G protein-coupled receptor 143 [Source:HGNC Symbol;Acc:HGNC:20145]                         |
| GPR179  | G protein-coupled receptor 179 [Source:HGNC Symbol;Acc:HGNC:31371]                         |
| GPX1    | glutathione peroxidase 1 [Source:HGNC Symbol;Acc:HGNC:4553]                                |
| GPX4    | glutathione peroxidase 4 [Source:HGNC Symbol;Acc:HGNC:4556]                                |
| GRIN3B  | glutamate ionotropic receptor NMDA type subunit 3B [Source:HGNC Symbol;Acc:HGNC:16768]     |
| GRK1    | G protein-coupled receptor kinase 1 [Source:HGNC Symbol;Acc:HGNC:10013]                    |
| GRK7    | G protein-coupled receptor kinase 7 [Source:HGNC Symbol;Acc:HGNC:17031]                    |
| GRM6    | glutamate metabotropic receptor 6 [Source:HGNC Symbol;Acc:HGNC:4598]                       |
| GSDMD   | gasdermin D [Source:HGNC Symbol;Acc:HGNC:25697]                                            |
| GSK3B   | glycogen synthase kinase 3 beta [Source:HGNC Symbol;Acc:HGNC:4617]                         |

|            |                                                                                                    |
|------------|----------------------------------------------------------------------------------------------------|
| GUCA1B     | guanylate cyclase activator 1B [Source:HGNC Symbol;Acc:HGNC:4679]                                  |
| GUCA1C     | guanylate cyclase activator 1C [Source:HGNC Symbol;Acc:HGNC:4680]                                  |
| GUCY2D     | guanylate cyclase 2D, retinal [Source:HGNC Symbol;Acc:HGNC:4689]                                   |
| HBEGF      | heparin binding EGF like growth factor [Source:HGNC Symbol;Acc:HGNC:3059]                          |
| HDAC6      | histone deacetylase 6 [Source:HGNC Symbol;Acc:HGNC:14064]                                          |
| HERPUD1    | homocysteine inducible ER protein with ubiquitin like domain 1 [Source:HGNC Symbol;Acc:HGNC:13744] |
| HFE        | hemochromatosis [Source:HGNC Symbol;Acc:HGNC:4886]                                                 |
| HFE2       | hemochromatosis type 2 (juvenile) [Source:HGNC Symbol;Acc:HGNC:4887]                               |
| HGF        | hepatocyte growth factor [Source:HGNC Symbol;Acc:HGNC:4893]                                        |
| HIST2H3PS2 | histone cluster 2, H3, pseudogene 2 [Source:HGNC Symbol;Acc:HGNC:32060]                            |
| HMGCR      | 3-hydroxy-3-methylglutaryl-CoA reductase [Source:HGNC Symbol;Acc:HGNC:5006]                        |
| ARHGAP45   | Rho GTPase activating protein 45 [Source:HGNC Symbol;Acc:HGNC:17102]                               |
| HN1        | hematological and neurological expressed 1 [Source:HGNC Symbol;Acc:HGNC:14569]                     |
| HPRT1      | hypoxanthine phosphoribosyltransferase 1 [Source:HGNC Symbol;Acc:HGNC:5157]                        |
| HSP90AA1   | heat shock protein 90kDa alpha family class A member 1 [Source:HGNC Symbol;Acc:HGNC:5253]          |
| HSPA5      | heat shock protein family A (Hsp70) member 5 [Source:HGNC Symbol;Acc:HGNC:5238]                    |
| HSPA8      | heat shock protein family A (Hsp70) member 8 [Source:HGNC Symbol;Acc:HGNC:5241]                    |
| HSPB1      | heat shock protein family B (small) member 1 [Source:HGNC Symbol;Acc:HGNC:5246]                    |
| HSPB2      | heat shock protein family B (small) member 2 [Source:HGNC Symbol;Acc:HGNC:5247]                    |
| HSPB3      | heat shock protein family B (small) member 3 [Source:HGNC Symbol;Acc:HGNC:5248]                    |
| HTRA2      | HtrA serine peptidase 2 [Source:HGNC Symbol;Acc:HGNC:14348]                                        |
| HTRA4      | HtrA serine peptidase 4 [Source:HGNC Symbol;Acc:HGNC:26909]                                        |
| HTT        | huntingtin [Source:HGNC Symbol;Acc:HGNC:4851]                                                      |
| ICAM2      | intercellular adhesion molecule 2 [Source:HGNC Symbol;Acc:HGNC:5345]                               |
| IDH3B      | isocitrate dehydrogenase 3 (NAD(+)) beta [Source:HGNC Symbol;Acc:HGNC:5385]                        |
| IER3       | immediate early response 3 [Source:HGNC Symbol;Acc:HGNC:5392]                                      |
| IFIH1      | interferon induced with helicase C domain 1 [Source:HGNC Symbol;Acc:HGNC:18873]                    |
| IFNA1      | interferon, alpha 1 [Source:HGNC Symbol;Acc:HGNC:5417]                                             |
| IFNB1      | interferon beta 1 [Source:HGNC Symbol;Acc:HGNC:5434]                                               |
| IGF2       | insulin like growth factor 2 [Source:HGNC Symbol;Acc:HGNC:5466]                                    |
| IGFBP2     | insulin like growth factor binding protein 2 [Source:HGNC Symbol;Acc:HGNC:5471]                    |
| IL1R1      | interleukin 1 receptor type 1 [Source:HGNC Symbol;Acc:HGNC:5993]                                   |
| IL23R      | interleukin 23 receptor [Source:HGNC Symbol;Acc:HGNC:19100]                                        |
| IL4        | interleukin 4 [Source:HGNC Symbol;Acc:HGNC:6014]                                                   |
| IL5        | interleukin 5 [Source:HGNC Symbol;Acc:HGNC:6016]                                                   |
| IL7        | interleukin 7 [Source:HGNC Symbol;Acc:HGNC:6023]                                                   |
| IL9        | interleukin 9 [Source:HGNC Symbol;Acc:HGNC:6029]                                                   |
| INS        | insulin [Source:HGNC Symbol;Acc:HGNC:6081]                                                         |
| IQCB1      | IQ motif containing B1 [Source:HGNC Symbol;Acc:HGNC:28949]                                         |
| IRAK1      | interleukin 1 receptor associated kinase 1 [Source:HGNC Symbol;Acc:HGNC:6112]                      |

|           |                                                                                                                      |
|-----------|----------------------------------------------------------------------------------------------------------------------|
| ISL1      | ISL LIM homeobox 1 [Source:HGNC Symbol;Acc:HGNC:6132]                                                                |
| ITGA7     | integrin subunit alpha 7 [Source:HGNC Symbol;Acc:HGNC:6143]                                                          |
| ITGAV     | integrin subunit alpha V [Source:HGNC Symbol;Acc:HGNC:6150]                                                          |
| ITIH4     | inter-alpha-trypsin inhibitor heavy chain family member 4 [Source:HGNC Symbol;Acc:HGNC:6169]                         |
| JAG1      | jagged 1 [Source:HGNC Symbol;Acc:HGNC:6188]                                                                          |
| JUN       | Jun proto-oncogene, AP-1 transcription factor subunit [Source:HGNC Symbol;Acc:HGNC:6204]                             |
| KBTBD12   | kelch repeat and BTB domain containing 12 [Source:HGNC Symbol;Acc:HGNC:25731]                                        |
| KCNJ10    | potassium voltage-gated channel subfamily J member 10 [Source:HGNC Symbol;Acc:HGNC:6256]                             |
| KCNJ13    | potassium voltage-gated channel subfamily J member 13 [Source:HGNC Symbol;Acc:HGNC:6259]                             |
| KCNV2     | potassium voltage-gated channel modifier subfamily V member 2 [Source:HGNC Symbol;Acc:HGNC:19698]                    |
| KCTD10    | potassium channel tetramerization domain containing 10 [Source:HGNC Symbol;Acc:HGNC:23236]                           |
| KIT       | KIT proto-oncogene receptor tyrosine kinase [Source:HGNC Symbol;Acc:HGNC:6342]                                       |
| KITLG     | KIT ligand [Source:HGNC Symbol;Acc:HGNC:6343]                                                                        |
| KLF4      | Kruppel like factor 4 [Source:HGNC Symbol;Acc:HGNC:6348]                                                             |
| KLHL7     | kelch like family member 7 [Source:HGNC Symbol;Acc:HGNC:15646]                                                       |
| KLK4      | kallikrein related peptidase 4 [Source:HGNC Symbol;Acc:HGNC:6365]                                                    |
| KLKB1     | kallikrein B1 [Source:HGNC Symbol;Acc:HGNC:6371]                                                                     |
| KMT2E     | lysine methyltransferase 2E [Source:HGNC Symbol;Acc:HGNC:18541]                                                      |
| KNG1      | kininogen 1 [Source:HGNC Symbol;Acc:HGNC:6383]                                                                       |
| KRT12     | keratin 12 [Source:HGNC Symbol;Acc:HGNC:6414]                                                                        |
| KRT18     | keratin 18 [Source:HGNC Symbol;Acc:HGNC:6430]                                                                        |
| KRTAP13-4 | keratin associated protein 13-4 [Source:HGNC Symbol;Acc:HGNC:18926]                                                  |
| LCA5      | LCA5, lebercilin [Source:HGNC Symbol;Acc:HGNC:31923]                                                                 |
| LEFTY2    | left-right determination factor 2 [Source:HGNC Symbol;Acc:HGNC:3122]                                                 |
| LEP       | leptin [Source:HGNC Symbol;Acc:HGNC:6553]                                                                            |
| LGALS3    | galectin 3 [Source:HGNC Symbol;Acc:HGNC:6563]                                                                        |
| LHX2      | LIM homeobox 2 [Source:HGNC Symbol;Acc:HGNC:6594]                                                                    |
| LIF       | leukemia inhibitory factor [Source:HGNC Symbol;Acc:HGNC:6596]                                                        |
| LIN28A    | lin-28 homolog A [Source:HGNC Symbol;Acc:HGNC:15986]                                                                 |
| LMNA      | lamin A/C [Source:HGNC Symbol;Acc:HGNC:6636]                                                                         |
| LOX       | lysyl oxidase [Source:HGNC Symbol;Acc:HGNC:6664]                                                                     |
| LOXL2     | lysyl oxidase like 2 [Source:HGNC Symbol;Acc:HGNC:6666]                                                              |
| LPCAT3    | lysophosphatidylcholine acyltransferase 3 [Source:HGNC Symbol;Acc:HGNC:30244]                                        |
| LRAT      | lecithin retinol acyltransferase (phosphatidylcholine--retinol O-acyltransferase) [Source:HGNC Symbol;Acc:HGNC:6685] |
| LRIT3     | leucine rich repeat, Ig-like and transmembrane domains 3 [Source:HGNC Symbol;Acc:HGNC:24783]                         |
| LRRK2     | leucine rich repeat kinase 2 [Source:HGNC Symbol;Acc:HGNC:18618]                                                     |
| LTA       | lymphotoxin alpha [Source:HGNC Symbol;Acc:HGNC:6709]                                                                 |

|           |                                                                                                             |
|-----------|-------------------------------------------------------------------------------------------------------------|
| LTBP2     | latent transforming growth factor beta binding protein 2 [Source:HGNC Symbol;Acc:HGNC:6715]                 |
| LTBP3     | latent transforming growth factor beta binding protein 3 [Source:HGNC Symbol;Acc:HGNC:6716]                 |
| LUM       | lumican [Source:HGNC Symbol;Acc:HGNC:6724]                                                                  |
| MAF       | MAF bZIP transcription factor [Source:HGNC Symbol;Acc:HGNC:6776]                                            |
| MAK       | male germ cell associated kinase [Source:HGNC Symbol;Acc:HGNC:6816]                                         |
| MAP1LC3A  | microtubule associated protein 1 light chain 3 alpha [Source:HGNC Symbol;Acc:HGNC:6838]                     |
| MAP1LC3B  | microtubule associated protein 1 light chain 3 beta [Source:HGNC Symbol;Acc:HGNC:13352]                     |
| MAP2K1    | mitogen-activated protein kinase kinase 1 [Source:HGNC Symbol;Acc:HGNC:6840]                                |
| MAP3K5    | mitogen-activated protein kinase kinase kinase 5 [Source:HGNC Symbol;Acc:HGNC:6857]                         |
| MAPT      | microtubule associated protein tau [Source:HGNC Symbol;Acc:HGNC:6893]                                       |
| MASP2     | mannan binding lectin serine peptidase 2 [Source:HGNC Symbol;Acc:HGNC:6902]                                 |
| MEPCE     | methylphosphate capping enzyme [Source:HGNC Symbol;Acc:HGNC:20247]                                          |
| MET       | MET proto-oncogene, receptor tyrosine kinase [Source:HGNC Symbol;Acc:HGNC:7029]                             |
| METTL7B   | methyltransferase like 7B [Source:HGNC Symbol;Acc:HGNC:28276]                                               |
| MFF       | mitochondrial fission factor [Source:HGNC Symbol;Acc:HGNC:24858]                                            |
| MIF       | macrophage migration inhibitory factor (glycosylation-inhibiting factor) [Source:HGNC Symbol;Acc:HGNC:7097] |
| MITF      | melanogenesis associated transcription factor [Source:HGNC Symbol;Acc:HGNC:7105]                            |
| MPO       | myeloperoxidase [Source:HGNC Symbol;Acc:HGNC:7218]                                                          |
| MRPL10    | mitochondrial ribosomal protein L10 [Source:HGNC Symbol;Acc:HGNC:14055]                                     |
| MRPL54    | mitochondrial ribosomal protein L54 [Source:HGNC Symbol;Acc:HGNC:16685]                                     |
| MSRA      | methionine sulfoxide reductase A [Source:HGNC Symbol;Acc:HGNC:7377]                                         |
| MTHFR     | methylenetetrahydrofolate reductase (NAD(P)H) [Source:HGNC Symbol;Acc:HGNC:7436]                            |
| MT-ND4    | mitochondrially encoded NADH:ubiquinone oxidoreductase core subunit 4 [Source:HGNC Symbol;Acc:HGNC:7459]    |
| MYBPH     | myosin binding protein H [Source:HGNC Symbol;Acc:HGNC:7552]                                                 |
| MYC       | v-myc avian myelocytomatosis viral oncogene homolog [Source:HGNC Symbol;Acc:HGNC:7553]                      |
| MYD88     | myeloid differentiation primary response 88 [Source:HGNC Symbol;Acc:HGNC:7562]                              |
| MYOC      | myocilin [Source:HGNC Symbol;Acc:HGNC:7610]                                                                 |
| NANOG     | Nanog homeobox [Source:HGNC Symbol;Acc:HGNC:20857]                                                          |
| NCL       | nucleolin [Source:HGNC Symbol;Acc:HGNC:7667]                                                                |
| NDP       | NDP, norrin cystine knot growth factor [Source:HGNC Symbol;Acc:HGNC:7678]                                   |
| NDUFA11   | NADH:ubiquinone oxidoreductase subunit A11 [Source:HGNC Symbol;Acc:HGNC:20371]                              |
| NEFL      | neurofilament, light polypeptide [Source:HGNC Symbol;Acc:HGNC:7739]                                         |
| NES       | nestin [Source:HGNC Symbol;Acc:HGNC:7756]                                                                   |
| NEUROD1   | neuronal differentiation 1 [Source:HGNC Symbol;Acc:HGNC:7762]                                               |
| NFAT5     | nuclear factor of activated T-cells 5, tonicity-responsive [Source:HGNC Symbol;Acc:HGNC:7774]               |
| NFKBIA    | NFkB inhibitor alpha [Source:HGNC Symbol;Acc:HGNC:7797]                                                     |
| NID1      | nidogen 1 [Source:HGNC Symbol;Acc:HGNC:7821]                                                                |
| NIPSNAP3B | nipsnap homolog 3B [Source:HGNC Symbol;Acc:HGNC:23641]                                                      |
| NLRC4     | NLR family CARD domain containing 4 [Source:HGNC Symbol;Acc:HGNC:16412]                                     |

|        |                                                                                                          |
|--------|----------------------------------------------------------------------------------------------------------|
| NLRC5  | NLR family CARD domain containing 5 [Source:HGNC Symbol;Acc:HGNC:29933]                                  |
| NOD2   | nucleotide binding oligomerization domain containing 2 [Source:HGNC Symbol;Acc:HGNC:5331]                |
| NOG    | noggin [Source:HGNC Symbol;Acc:HGNC:7866]                                                                |
| NOS1   | nitric oxide synthase 1 [Source:HGNC Symbol;Acc:HGNC:7872]                                               |
| NOS1AP | nitric oxide synthase 1 adaptor protein [Source:HGNC Symbol;Acc:HGNC:16859]                              |
| NOS3   | nitric oxide synthase 3 [Source:HGNC Symbol;Acc:HGNC:7876]                                               |
| NOTCH1 | notch 1 [Source:HGNC Symbol;Acc:HGNC:7881]                                                               |
| NOX1   | NADPH oxidase 1 [Source:HGNC Symbol;Acc:HGNC:7889]                                                       |
| NOX4   | NADPH oxidase 4 [Source:HGNC Symbol;Acc:HGNC:7891]                                                       |
| NPIPA2 | nuclear pore complex interacting protein family member A2 [Source:HGNC Symbol;Acc:HGNC:41979]            |
| NPIPA3 | nuclear pore complex interacting protein family member A3 [Source:HGNC Symbol;Acc:HGNC:41978]            |
| NRL    | neural retina leucine zipper [Source:HGNC Symbol;Acc:HGNC:8002]                                          |
| NRP1   | neuropilin 1 [Source:HGNC Symbol;Acc:HGNC:8004]                                                          |
| NRP2   | neuropilin 2 [Source:HGNC Symbol;Acc:HGNC:8005]                                                          |
| NRTN   | neurturin [Source:HGNC Symbol;Acc:HGNC:8007]                                                             |
| NT5DC3 | 5'-nucleotidase domain containing 3 [Source:HGNC Symbol;Acc:HGNC:30826]                                  |
| NT5E   | 5'-nucleotidase ecto [Source:HGNC Symbol;Acc:HGNC:8021]                                                  |
| NTF3   | neurotrophin 3 [Source:HGNC Symbol;Acc:HGNC:8023]                                                        |
| NTF4   | neurotrophin 4 [Source:HGNC Symbol;Acc:HGNC:8024]                                                        |
| NTRK1  | neurotrophic receptor tyrosine kinase 1 [Source:HGNC Symbol;Acc:HGNC:8031]                               |
| NTRK2  | neurotrophic receptor tyrosine kinase 2 [Source:HGNC Symbol;Acc:HGNC:8032]                               |
| NXNL1  | nucleoredoxin-like 1 [Source:HGNC Symbol;Acc:HGNC:25179]                                                 |
| NYAP1  | neuronal tyrosine phosphorylated phosphoinositide-3-kinase adaptor 1 [Source:HGNC Symbol;Acc:HGNC:22009] |
| NYX    | nyctalopin [Source:HGNC Symbol;Acc:HGNC:8082]                                                            |
| OCLN   | occludin [Source:HGNC Symbol;Acc:HGNC:8104]                                                              |
| OLR1   | oxidized low density lipoprotein receptor 1 [Source:HGNC Symbol;Acc:HGNC:8133]                           |
| OPN1LW | opsin 1 (cone pigments), long-wave-sensitive [Source:HGNC Symbol;Acc:HGNC:9936]                          |
| OPN1SW | opsin 1 (cone pigments), short-wave-sensitive [Source:HGNC Symbol;Acc:HGNC:1012]                         |
| OPN4   | opsin 4 [Source:HGNC Symbol;Acc:HGNC:14449]                                                              |
| OPTN   | optineurin [Source:HGNC Symbol;Acc:HGNC:17142]                                                           |
| OR10P1 | olfactory receptor family 10 subfamily P member 1 [Source:HGNC Symbol;Acc:HGNC:15378]                    |
| P4HB   | prolyl 4-hydroxylase subunit beta [Source:HGNC Symbol;Acc:HGNC:8548]                                     |
| PARK2  | parkin RBR E3 ubiquitin protein ligase [Source:HGNC Symbol;Acc:HGNC:8607]                                |
| PARK7  | Parkinsonism associated deglycase [Source:HGNC Symbol;Acc:HGNC:16369]                                    |
| PAX6   | paired box 6 [Source:HGNC Symbol;Acc:HGNC:8620]                                                          |
| PCDH15 | protocadherin related 15 [Source:HGNC Symbol;Acc:HGNC:14674]                                             |
| PCSK9  | proprotein convertase subtilisin/kexin type 9 [Source:HGNC Symbol;Acc:HGNC:20001]                        |
| PDC    | phosducin [Source:HGNC Symbol;Acc:HGNC:8759]                                                             |
| PDE6A  | phosphodiesterase 6A [Source:HGNC Symbol;Acc:HGNC:8785]                                                  |



|         |                                                                                            |
|---------|--------------------------------------------------------------------------------------------|
| PDE6B   | phosphodiesterase 6B [Source:HGNC Symbol;Acc:HGNC:8786]                                    |
| PDE6C   | phosphodiesterase 6C [Source:HGNC Symbol;Acc:HGNC:8787]                                    |
| PDE6G   | phosphodiesterase 6G [Source:HGNC Symbol;Acc:HGNC:8789]                                    |
| PDE6H   | phosphodiesterase 6H [Source:HGNC Symbol;Acc:HGNC:8790]                                    |
| PDGFA   | platelet derived growth factor subunit A [Source:HGNC Symbol;Acc:HGNC:8799]                |
| PDGFB   | platelet derived growth factor subunit B [Source:HGNC Symbol;Acc:HGNC:8800]                |
| PDGFC   | platelet derived growth factor C [Source:HGNC Symbol;Acc:HGNC:8801]                        |
| PDGFRB  | platelet derived growth factor receptor beta [Source:HGNC Symbol;Acc:HGNC:8804]            |
| PECAM1  | platelet and endothelial cell adhesion molecule 1 [Source:HGNC Symbol;Acc:HGNC:8823]       |
| PI3     | peptidase inhibitor 3 [Source:HGNC Symbol;Acc:HGNC:8947]                                   |
| PICALM  | phosphatidylinositol binding clathrin assembly protein [Source:HGNC Symbol;Acc:HGNC:15514] |
| PICK1   | protein interacting with PRKCA 1 [Source:HGNC Symbol;Acc:HGNC:9394]                        |
| PILRB   | paired immunoglobulin-like type 2 receptor beta [Source:HGNC Symbol;Acc:HGNC:18297]        |
| PINK1   | PTEN induced putative kinase 1 [Source:HGNC Symbol;Acc:HGNC:14581]                         |
| PIWIL1  | piwi like RNA-mediated gene silencing 1 [Source:HGNC Symbol;Acc:HGNC:9007]                 |
| PIWIL4  | piwi like RNA-mediated gene silencing 4 [Source:HGNC Symbol;Acc:HGNC:18444]                |
| PKM     | pyruvate kinase, muscle [Source:HGNC Symbol;Acc:HGNC:9021]                                 |
| PKN3    | protein kinase N3 [Source:HGNC Symbol;Acc:HGNC:17999]                                      |
| PLA2G1B | phospholipase A2 group IB [Source:HGNC Symbol;Acc:HGNC:9030]                               |
| PLA2G6  | phospholipase A2 group VI [Source:HGNC Symbol;Acc:HGNC:9039]                               |
| PLAT    | plasminogen activator, tissue type [Source:HGNC Symbol;Acc:HGNC:9051]                      |
| PLAUR   | plasminogen activator, urokinase receptor [Source:HGNC Symbol;Acc:HGNC:9053]               |
| PLK1    | polo like kinase 1 [Source:HGNC Symbol;Acc:HGNC:9077]                                      |
| PLVAP   | plasmalemma vesicle associated protein [Source:HGNC Symbol;Acc:HGNC:13635]                 |
| PLXNA4  | plexin A4 [Source:HGNC Symbol;Acc:HGNC:9102]                                               |
| PMEL    | premelanosome protein [Source:HGNC Symbol;Acc:HGNC:10880]                                  |
| POLR2E  | polymerase (RNA) II subunit E [Source:HGNC Symbol;Acc:HGNC:9192]                           |
| POLR2F  | polymerase (RNA) II subunit F [Source:HGNC Symbol;Acc:HGNC:9193]                           |
| POTEF   | POTE ankyrin domain family member F [Source:HGNC Symbol;Acc:HGNC:33905]                    |
| POU4F1  | POU class 4 homeobox 1 [Source:HGNC Symbol;Acc:HGNC:9218]                                  |
| POU4F2  | POU class 4 homeobox 2 [Source:HGNC Symbol;Acc:HGNC:9219]                                  |
| POU5F1  | POU class 5 homeobox 1 [Source:HGNC Symbol;Acc:HGNC:9221]                                  |
| PPIA    | peptidylprolyl isomerase A [Source:HGNC Symbol;Acc:HGNC:9253]                              |
| PPIG    | peptidylprolyl isomerase G [Source:HGNC Symbol;Acc:HGNC:14650]                             |
| PRKCA   | protein kinase C alpha [Source:HGNC Symbol;Acc:HGNC:9393]                                  |
| PRKCB   | protein kinase C beta [Source:HGNC Symbol;Acc:HGNC:9395]                                   |
| PRPF3   | pre-mRNA processing factor 3 [Source:HGNC Symbol;Acc:HGNC:17348]                           |
| PRPF8   | pre-mRNA processing factor 8 [Source:HGNC Symbol;Acc:HGNC:17340]                           |
| PSEN1   | presenilin 1 [Source:HGNC Symbol;Acc:HGNC:9508]                                            |
| PTGS2   | prostaglandin-endoperoxide synthase 2 [Source:HGNC Symbol;Acc:HGNC:9605]                   |
| PTK2    | protein tyrosine kinase 2 [Source:HGNC Symbol;Acc:HGNC:9611]                               |

|         |                                                                                            |
|---------|--------------------------------------------------------------------------------------------|
| PTK7    | protein tyrosine kinase 7 (inactive) [Source:HGNC Symbol;Acc:HGNC:9618]                    |
| PTPN22  | protein tyrosine phosphatase, non-receptor type 22 [Source:HGNC Symbol;Acc:HGNC:9652]      |
| PTPRB   | protein tyrosine phosphatase, receptor type B [Source:HGNC Symbol;Acc:HGNC:9665]           |
| PTPRC   | protein tyrosine phosphatase, receptor type C [Source:HGNC Symbol;Acc:HGNC:9666]           |
| RAB28   | RAB28, member RAS oncogene family [Source:HGNC Symbol;Acc:HGNC:9768]                       |
| RAB5A   | RAB5A, member RAS oncogene family [Source:HGNC Symbol;Acc:HGNC:9783]                       |
| RAB7A   | RAB7A, member RAS oncogene family [Source:HGNC Symbol;Acc:HGNC:9788]                       |
| RANBP3  | RAN binding protein 3 [Source:HGNC Symbol;Acc:HGNC:9850]                                   |
| RAPGEF1 | Rap guanine nucleotide exchange factor 1 [Source:HGNC Symbol;Acc:HGNC:4568]                |
| RASIP1  | Ras interacting protein 1 [Source:HGNC Symbol;Acc:HGNC:24716]                              |
| RB1CC1  | RB1 inducible coiled-coil 1 [Source:HGNC Symbol;Acc:HGNC:15574]                            |
| RBFOX3  | RNA binding protein, fox-1 homolog 3 [Source:HGNC Symbol;Acc:HGNC:27097]                   |
| RBM8A   | RNA binding motif protein 8A [Source:HGNC Symbol;Acc:HGNC:9905]                            |
| RBMS1   | RNA binding motif single stranded interacting protein 1 [Source:HGNC Symbol;Acc:HGNC:9907] |
| RBMS2   | RNA binding motif single stranded interacting protein 2 [Source:HGNC Symbol;Acc:HGNC:9909] |
| RBP1    | retinol binding protein 1 [Source:HGNC Symbol;Acc:HGNC:9919]                               |
| RBP3    | retinol binding protein 3 [Source:HGNC Symbol;Acc:HGNC:9921]                               |
| RBP4    | retinol binding protein 4 [Source:HGNC Symbol;Acc:HGNC:9922]                               |
| RBPM5   | RNA binding protein with multiple splicing [Source:HGNC Symbol;Acc:HGNC:19097]             |
| RCVRN   | recoverin [Source:HGNC Symbol;Acc:HGNC:9937]                                               |
| RDH10   | retinol dehydrogenase 10 (all-trans) [Source:HGNC Symbol;Acc:HGNC:19975]                   |
| RDH11   | retinol dehydrogenase 11 (all-trans/9-cis/11-cis) [Source:HGNC Symbol;Acc:HGNC:17964]      |
| RDH12   | retinol dehydrogenase 12 (all-trans/9-cis/11-cis) [Source:HGNC Symbol;Acc:HGNC:19977]      |
| RDH14   | retinol dehydrogenase 14 (all-trans/9-cis/11-cis) [Source:HGNC Symbol;Acc:HGNC:19979]      |
| REEP6   | receptor accessory protein 6 [Source:HGNC Symbol;Acc:HGNC:30078]                           |
| REL     | REL proto-oncogene, NF-kB subunit [Source:HGNC Symbol;Acc:HGNC:9954]                       |
| RELA    | RELA proto-oncogene, NF-kB subunit [Source:HGNC Symbol;Acc:HGNC:9955]                      |
| RELB    | RELB proto-oncogene, NF-kB subunit [Source:HGNC Symbol;Acc:HGNC:9956]                      |
| REN     | renin [Source:HGNC Symbol;Acc:HGNC:9958]                                                   |
| RGS9BP  | regulator of G-protein signaling 9 binding protein [Source:HGNC Symbol;Acc:HGNC:30304]     |
| RHOA    | ras homolog family member A [Source:HGNC Symbol;Acc:HGNC:667]                              |
| RIPK3   | receptor interacting serine/threonine kinase 3 [Source:HGNC Symbol;Acc:HGNC:10021]         |
| ROBO4   | roundabout guidance receptor 4 [Source:HGNC Symbol;Acc:HGNC:17985]                         |
| RORB    | RAR related orphan receptor B [Source:HGNC Symbol;Acc:HGNC:10259]                          |
| RP9     | retinitis pigmentosa 9 (autosomal dominant) [Source:HGNC Symbol;Acc:HGNC:10288]            |
| RRH     | retinal pigment epithelium-derived rhodopsin homolog [Source:HGNC Symbol;Acc:HGNC:10450]   |
| RTBDN   | retbindin [Source:HGNC Symbol;Acc:HGNC:30310]                                              |
| S1PR2   | sphingosine-1-phosphate receptor 2 [Source:HGNC Symbol;Acc:HGNC:3169]                      |
| SAG     | S-antigen; retina and pineal gland (arrestin) [Source:HGNC Symbol;Acc:HGNC:10521]          |
| SARM1   | sterile alpha and TIR motif containing 1 [Source:HGNC Symbol;Acc:HGNC:17074]               |
| SARNP   | SAP domain containing ribonucleoprotein [Source:HGNC Symbol;Acc:HGNC:24432]                |

|         |                                                                                             |
|---------|---------------------------------------------------------------------------------------------|
| SBNO2   | strawberry notch homolog 2 (Drosophila) [Source:HGNC Symbol;Acc:HGNC:29158]                 |
| SCIN    | scinderin [Source:HGNC Symbol;Acc:HGNC:21695]                                               |
| SDR9C7  | short chain dehydrogenase/reductase family 9C, member 7 [Source:HGNC Symbol;Acc:HGNC:29958] |
| SEMA3B  | semaphorin 3B [Source:HGNC Symbol;Acc:HGNC:10724]                                           |
| SEMA3C  | semaphorin 3C [Source:HGNC Symbol;Acc:HGNC:10725]                                           |
| SEMA3D  | semaphorin 3D [Source:HGNC Symbol;Acc:HGNC:10726]                                           |
| SEMA3F  | semaphorin 3F [Source:HGNC Symbol;Acc:HGNC:10728]                                           |
| SEMA3G  | semaphorin 3G [Source:HGNC Symbol;Acc:HGNC:30400]                                           |
| SEMA4B  | semaphorin 4B [Source:HGNC Symbol;Acc:HGNC:10730]                                           |
| SEMA4C  | semaphorin 4C [Source:HGNC Symbol;Acc:HGNC:10731]                                           |
| SEMA4D  | semaphorin 4D [Source:HGNC Symbol;Acc:HGNC:10732]                                           |
| SEMA4F  | ssemaphorin 4F [Source:HGNC Symbol;Acc:HGNC:10734]                                          |
| SEMA4G  | semaphorin 4G [Source:HGNC Symbol;Acc:HGNC:10735]                                           |
| SEMA5A  | semaphorin 5A [Source:HGNC Symbol;Acc:HGNC:10736]                                           |
| SEMA5B  | semaphorin 5B [Source:HGNC Symbol;Acc:HGNC:10737]                                           |
| SEMA6A  | semaphorin 6A [Source:HGNC Symbol;Acc:HGNC:10738]                                           |
| SEMA6B  | semaphorin 6B [Source:HGNC Symbol;Acc:HGNC:10739]                                           |
| SEMA6C  | semaphorin 6C [Source:HGNC Symbol;Acc:HGNC:10740]                                           |
| SEMA6D  | semaphorin 6D [Source:HGNC Symbol;Acc:HGNC:16770]                                           |
| SEMA7A  | semaphorin 7A (John Milton Hagen blood group) [Source:HGNC Symbol;Acc:HGNC:10741]           |
| SFTA3   | surfactant associated 3 [Source:HGNC Symbol;Acc:HGNC:18387]                                 |
| SH2D2A  | SH2 domain containing 2A [Source:HGNC Symbol;Acc:HGNC:10821]                                |
| SHH     | sonic hedgehog [Source:HGNC Symbol;Acc:HGNC:10848]                                          |
| SIRT2   | sirtuin 2 [Source:HGNC Symbol;Acc:HGNC:10886]                                               |
| SIRT3   | sirtuin 3 [Source:HGNC Symbol;Acc:HGNC:14931]                                               |
| SIRT4   | sirtuin 4 [Source:HGNC Symbol;Acc:HGNC:14932]                                               |
| SIRT5   | sirtuin 5 [Source:HGNC Symbol;Acc:HGNC:14933]                                               |
| SIRT6   | sirtuin 6 [Source:HGNC Symbol;Acc:HGNC:14934]                                               |
| SIRT7   | sirtuin 7 [Source:HGNC Symbol;Acc:HGNC:14935]                                               |
| SIX3    | SIX homeobox 3 [Source:HGNC Symbol;Acc:HGNC:10889]                                          |
| SIX6    | SIX homeobox 6 [Source:HGNC Symbol;Acc:HGNC:10892]                                          |
| SLC12A3 | solute carrier family 12 member 3 [Source:HGNC Symbol;Acc:HGNC:10912]                       |
| SLC16A3 | solute carrier family 16 member 3 [Source:HGNC Symbol;Acc:HGNC:10924]                       |
| SLC1A3  | solute carrier family 1 member 3 [Source:HGNC Symbol;Acc:HGNC:10941]                        |
| SLC1A7  | solute carrier family 1 member 7 [Source:HGNC Symbol;Acc:HGNC:10945]                        |
| SLC24A5 | solute carrier family 24 member 5 [Source:HGNC Symbol;Acc:HGNC:20611]                       |
| SLC46A1 | solute carrier family 46 member 1 [Source:HGNC Symbol;Acc:HGNC:30521]                       |
| SLC4A11 | solute carrier family 4 member 11 [Source:HGNC Symbol;Acc:HGNC:16438]                       |
| SMAD2   | SMAD family member 2 [Source:HGNC Symbol;Acc:HGNC:6768]                                     |
| SMAD3   | SMAD family member 3 [Source:HGNC Symbol;Acc:HGNC:6769]                                     |
| SMAD9   | SMAD family member 9 [Source:HGNC Symbol;Acc:HGNC:6774]                                     |

|          |                                                                                                     |
|----------|-----------------------------------------------------------------------------------------------------|
| SNAI1    | snail family transcriptional repressor 1 [Source:HGNC Symbol;Acc:HGNC:11128]                        |
| SNCA     | synuclein alpha [Source:HGNC Symbol;Acc:HGNC:11138]                                                 |
| SNCG     | synuclein gamma [Source:HGNC Symbol;Acc:HGNC:11141]                                                 |
| SNRNP200 | small nuclear ribonucleoprotein U5 subunit 200 [Source:HGNC Symbol;Acc:HGNC:30859]                  |
| SOCS3    | suppressor of cytokine signaling 3 [Source:HGNC Symbol;Acc:HGNC:19391]                              |
| SOD3     | superoxide dismutase 3, extracellular [Source:HGNC Symbol;Acc:HGNC:11181]                           |
| SORT1    | sortilin 1 [Source:HGNC Symbol;Acc:HGNC:11186]                                                      |
| SOX10    | SRY-box 10 [Source:HGNC Symbol;Acc:HGNC:11190]                                                      |
| SOX2     | SRY-box 2 [Source:HGNC Symbol;Acc:HGNC:11195]                                                       |
| SPARC    | secreted protein acidic and cysteine rich [Source:HGNC Symbol;Acc:HGNC:11219]                       |
| SPATA7   | spermatogenesis associated 7 [Source:HGNC Symbol;Acc:HGNC:20423]                                    |
| SPDYE3   | speedy/RINGO cell cycle regulator family member E3 [Source:HGNC Symbol;Acc:HGNC:35462]              |
| SPEF2    | sperm flagellar 2 [Source:HGNC Symbol;Acc:HGNC:26293]                                               |
| SPINK2   | serine peptidase inhibitor, Kazal type 2 [Source:HGNC Symbol;Acc:HGNC:11245]                        |
| SPP1     | secreted phosphoprotein 1 [Source:HGNC Symbol;Acc:HGNC:11255]                                       |
| SRC      | SRC proto-oncogene, non-receptor tyrosine kinase [Source:HGNC Symbol;Acc:HGNC:11283]                |
| SRPK1    | SRSF protein kinase 1 [Source:HGNC Symbol;Acc:HGNC:11305]                                           |
| STARD3   | StAR related lipid transfer domain containing 3 [Source:HGNC Symbol;Acc:HGNC:17579]                 |
| STAT1    | signal transducer and activator of transcription 1 [Source:HGNC Symbol;Acc:HGNC:11362]              |
| STRA6    | stimulated by retinoic acid 6 [Source:HGNC Symbol;Acc:HGNC:30650]                                   |
| STX3     | syntaxin 3 [Source:HGNC Symbol;Acc:HGNC:11438]                                                      |
| SYP      | synaptophysin [Source:HGNC Symbol;Acc:HGNC:11506]                                                   |
| TBL1X    | transducin (beta)-like 1X-linked [Source:HGNC Symbol;Acc:HGNC:11585]                                |
| TCF7L2   | transcription factor 7 like 2 [Source:HGNC Symbol;Acc:HGNC:11641]                                   |
| TEK      | TEK receptor tyrosine kinase [Source:HGNC Symbol;Acc:HGNC:11724]                                    |
| TERT     | telomerase reverse transcriptase [Source:HGNC Symbol;Acc:HGNC:11730]                                |
| TFAM     | transcription factor A, mitochondrial [Source:HGNC Symbol;Acc:HGNC:11741]                           |
| TFEB     | transcription factor EB [Source:HGNC Symbol;Acc:HGNC:11753]                                         |
| TGFB3    | transforming growth factor beta 3 [Source:HGNC Symbol;Acc:HGNC:11769]                               |
| TGFB1    | transforming growth factor beta induced [Source:HGNC Symbol;Acc:HGNC:11771]                         |
| TH       | tyrosine hydroxylase [Source:HGNC Symbol;Acc:HGNC:11782]                                            |
| THBS2    | thrombospondin 2 [Source:HGNC Symbol;Acc:HGNC:11786]                                                |
| THY1     | Thy-1 cell surface antigen [Source:HGNC Symbol;Acc:HGNC:11801]                                      |
| TIE1     | tyrosine kinase with immunoglobulin like and EGF like domains 1 [Source:HGNC Symbol;Acc:HGNC:11809] |
| TJP1     | tight junction protein 1 [Source:HGNC Symbol;Acc:HGNC:11827]                                        |
| TLR6     | toll like receptor 6 [Source:HGNC Symbol;Acc:HGNC:16711]                                            |
| TLR8     | toll like receptor 8 [Source:HGNC Symbol;Acc:HGNC:15632]                                            |
| TLR9     | toll like receptor 9 [Source:HGNC Symbol;Acc:HGNC:15633]                                            |
| TMCO1    | transmembrane and coiled-coil domains 1 [Source:HGNC Symbol;Acc:HGNC:18188]                         |
| TMEM199  | transmembrane protein 199 [Source:HGNC Symbol;Acc:HGNC:18085]                                       |
| TMEM259  | transmembrane protein 259 [Source:HGNC Symbol;Acc:HGNC:17039]                                       |

|          |                                                                                                        |
|----------|--------------------------------------------------------------------------------------------------------|
| TNFAIP1  | TNF alpha induced protein 1 [Source:HGNC Symbol;Acc:HGNC:11894]                                        |
| TNFAIP6  | TNF alpha induced protein 6 [Source:HGNC Symbol;Acc:HGNC:11898]                                        |
| TNFRSF1A | tumor necrosis factor receptor superfamily member 1A [Source:HGNC Symbol;Acc:HGNC:11916]               |
| TOPORS   | TOP1 binding arginine/serine rich protein [Source:HGNC Symbol;Acc:HGNC:21653]                          |
| TRIP10   | thyroid hormone receptor interactor 10 [Source:HGNC Symbol;Acc:HGNC:12304]                             |
| TSC22D4  | TSC22 domain family member 4 [Source:HGNC Symbol;Acc:HGNC:21696]                                       |
| TSPAN10  | tetraspanin 10 [Source:HGNC Symbol;Acc:HGNC:29942]                                                     |
| TSPAN12  | tetraspanin 12 [Source:HGNC Symbol;Acc:HGNC:21641]                                                     |
| TTR      | transthyretin [Source:HGNC Symbol;Acc:HGNC:12405]                                                      |
| TUB      | tubby bipartite transcription factor [Source:HGNC Symbol;Acc:HGNC:12406]                               |
| TUBB4A   | tubulin beta 4A class IVa [Source:HGNC Symbol;Acc:HGNC:20774]                                          |
| TULP1    | tubby like protein 1 [Source:HGNC Symbol;Acc:HGNC:12423]                                               |
| TYR      | tyrosinase [Source:HGNC Symbol;Acc:HGNC:12442]                                                         |
| TYRP1    | tyrosinase related protein 1 [Source:HGNC Symbol;Acc:HGNC:12450]                                       |
| UCP2     | uncoupling protein 2 [Source:HGNC Symbol;Acc:HGNC:12518]                                               |
| USH2A    | usherin [Source:HGNC Symbol;Acc:HGNC:12601]                                                            |
| VAV1     | vav guanine nucleotide exchange factor 1 [Source:HGNC Symbol;Acc:HGNC:12657]                           |
| VAX2     | ventral anterior homeobox 2 [Source:HGNC Symbol;Acc:HGNC:12661]                                        |
| VCAM1    | vascular cell adhesion molecule 1 [Source:HGNC Symbol;Acc:HGNC:12663]                                  |
| VCAN     | versican [Source:HGNC Symbol;Acc:HGNC:2464]                                                            |
| VEGFB    | vascular endothelial growth factor B [Source:HGNC Symbol;Acc:HGNC:12681]                               |
| VIP      | vasoactive intestinal peptide [Source:HGNC Symbol;Acc:HGNC:12693]                                      |
| VKORC1   | vitamin K epoxide reductase complex subunit 1 [Source:HGNC Symbol;Acc:HGNC:23663]                      |
| VMAC     | vimentin-type intermediate filament associated coiled-coil protein [Source:HGNC Symbol;Acc:HGNC:33803] |
| VSIG4    | V-set and immunoglobulin domain containing 4 [Source:HGNC Symbol;Acc:HGNC:17032]                       |
| VSX2     | visual system homeobox 2 [Source:HGNC Symbol;Acc:HGNC:1975]                                            |
| WDR18    | WD repeat domain 18 [Source:HGNC Symbol;Acc:HGNC:17956]                                                |
| WDR36    | WD repeat domain 36 [Source:HGNC Symbol;Acc:HGNC:30696]                                                |
| WNT3A    | Wnt family member 3A [Source:HGNC Symbol;Acc:HGNC:15983]                                               |
| XBP1     | X-box binding protein 1 [Source:HGNC Symbol;Acc:HGNC:12801]                                            |
| XPO5     | exportin 5 [Source:HGNC Symbol;Acc:HGNC:17675]                                                         |
| ZC3H12A  | zinc finger CCCH-type containing 12A [Source:HGNC Symbol;Acc:HGNC:26259]                               |
| ZPR1     | ZPR1 zinc finger [Source:HGNC Symbol;Acc:HGNC:13051]                                                   |
| CD14     | CD14 molecule [Source:HGNC Symbol;Acc:HGNC:1628]                                                       |
| RASGRP1  | RAS guanyl releasing protein 1 [Source:HGNC Symbol;Acc:HGNC:9878]                                      |
| GAS1     | growth arrest specific 1 [Source:HGNC Symbol;Acc:HGNC:4165]                                            |
| SLC39A8  | solute carrier family 39 member 8 [Source:HGNC Symbol;Acc:HGNC:20862]                                  |
| TNFSF10  | tumor necrosis factor superfamily member 10 [Source:HGNC Symbol;Acc:HGNC:11925]                        |
| E2F8     | E2F transcription factor 8 [Source:HGNC Symbol;Acc:HGNC:24727]                                         |
| CD74     | CD74 molecule [Source:HGNC Symbol;Acc:HGNC:1697]                                                       |

|          |                                                                                                        |
|----------|--------------------------------------------------------------------------------------------------------|
| CXCL2    | C-X-C motif chemokine ligand 2 [Source:HGNC Symbol;Acc:HGNC:4603]                                      |
| PPP1R16B | protein phosphatase 1 regulatory subunit 16B [Source:HGNC Symbol;Acc:HGNC:15850]                       |
| SLC2A14  | solute carrier family 2 member 14 [Source:HGNC Symbol;Acc:HGNC:18301]                                  |
| PLA2G4A  | phospholipase A2 group IVA [Source:HGNC Symbol;Acc:HGNC:9035]                                          |
| LSM3     | LSM3 homolog, U6 small nuclear RNA and mRNA degradation associated [Source:HGNC Symbol;Acc:HGNC:17874] |
| ZNF711   | zinc finger protein 711 [Source:HGNC Symbol;Acc:HGNC:13128]                                            |
| AKR1B10  | aldo-keto reductase family 1 member B10 [Source:HGNC Symbol;Acc:HGNC:382]                              |
| S100A9   | S100 calcium binding protein A9 [Source:HGNC Symbol;Acc:HGNC:10499]                                    |
| TTC9     | tetratricopeptide repeat domain 9 [Source:HGNC Symbol;Acc:HGNC:20267]                                  |
| GPX2     | glutathione peroxidase 2 [Source:HGNC Symbol;Acc:HGNC:4554]                                            |
| GPT      | glutamic-pyruvate transaminase (alanine aminotransferase) [Source:HGNC Symbol;Acc:HGNC:4552]           |
| AREG     | amphiregulin [Source:HGNC Symbol;Acc:HGNC:651]                                                         |
| PAK3     | p21 (RAC1) activated kinase 3 [Source:HGNC Symbol;Acc:HGNC:8592]                                       |
| PDK4     | pyruvate dehydrogenase kinase 4 [Source:HGNC Symbol;Acc:HGNC:8812]                                     |
| PIK3R1   | phosphoinositide-3-kinase regulatory subunit 1 [Source:HGNC Symbol;Acc:HGNC:8979]                      |
| PRY      | PTPN13-like, Y-linked [Source:HGNC Symbol;Acc:HGNC:14024]                                              |
| JCHAIN   | joining chain of multimeric IgA and IgM [Source:HGNC Symbol;Acc:HGNC:5713]                             |
| MYL2     | myosin light chain 2 [Source:HGNC Symbol;Acc:HGNC:7583]                                                |
| SRR      | serine racemase [Source:HGNC Symbol;Acc:HGNC:14398]                                                    |
| ALPL     | alkaline phosphatase, liver/bone/kidney [Source:HGNC Symbol;Acc:HGNC:438]                              |
| MAOA     | monoamine oxidase A [Source:HGNC Symbol;Acc:HGNC:6833]                                                 |
| NME4     | NME/NM23 nucleoside diphosphate kinase 4 [Source:HGNC Symbol;Acc:HGNC:7852]                            |
| PLXDC2   | plexin domain containing 2 [Source:HGNC Symbol;Acc:HGNC:21013]                                         |
| IGFBP3   | insulin like growth factor binding protein 3 [Source:HGNC Symbol;Acc:HGNC:5472]                        |
| MTF1     | metal-regulatory transcription factor 1 [Source:HGNC Symbol;Acc:HGNC:7428]                             |
| RPL17    | ribosomal protein L17 [Source:HGNC Symbol;Acc:HGNC:10307]                                              |
| MAP3K14  | mitogen-activated protein kinase kinase kinase 14 [Source:HGNC Symbol;Acc:HGNC:6853]                   |
| IRF6     | interferon regulatory factor 6 [Source:HGNC Symbol;Acc:HGNC:6121]                                      |
| NCOA7    | nuclear receptor coactivator 7 [Source:HGNC Symbol;Acc:HGNC:21081]                                     |
| IFI44    | interferon induced protein 44 [Source:HGNC Symbol;Acc:HGNC:16938]                                      |
| ACACA    | acetyl-CoA carboxylase alpha [Source:HGNC Symbol;Acc:HGNC:84]                                          |
| STEAP4   | STEAP4 metalloredutase [Source:HGNC Symbol;Acc:HGNC:21923]                                             |
| GPRC5A   | G protein-coupled receptor class C group 5 member A [Source:HGNC Symbol;Acc:HGNC:9836]                 |
| CNN3     | calponin 3 [Source:HGNC Symbol;Acc:HGNC:2157]                                                          |
| STK11    | serine/threonine kinase 11 [Source:HGNC Symbol;Acc:HGNC:11389]                                         |
| SLC7A7   | solute carrier family 7 member 7 [Source:HGNC Symbol;Acc:HGNC:11065]                                   |
| EGLN1    | egl-9 family hypoxia inducible factor 1 [Source:HGNC Symbol;Acc:HGNC:1232]                             |
| PRSS8    | protease, serine 8 [Source:HGNC Symbol;Acc:HGNC:9491]                                                  |
| BST2     | bone marrow stromal cell antigen 2 [Source:HGNC Symbol;Acc:HGNC:1119]                                  |

|         |                                                                                                                            |
|---------|----------------------------------------------------------------------------------------------------------------------------|
| TRPC6   | transient receptor potential cation channel subfamily C member 6 [Source:HGNC Symbol;Acc:HGNC:12338]                       |
| IHH     | indian hedgehog [Source:HGNC Symbol;Acc:HGNC:5956]                                                                         |
| L1CAM   | L1 cell adhesion molecule [Source:HGNC Symbol;Acc:HGNC:6470]                                                               |
| ETV5    | ETS variant 5 [Source:HGNC Symbol;Acc:HGNC:3494]                                                                           |
| SMC4    | structural maintenance of chromosomes 4 [Source:HGNC Symbol;Acc:HGNC:14013]                                                |
| LAMB3   | laminin subunit beta 3 [Source:HGNC Symbol;Acc:HGNC:6490]                                                                  |
| NPC1    | NPC intracellular cholesterol transporter 1 [Source:HGNC Symbol;Acc:HGNC:7897]                                             |
| NR5A1   | nuclear receptor subfamily 5 group A member 1 [Source:HGNC Symbol;Acc:HGNC:7983]                                           |
| DLD     | dihydrolipoamide dehydrogenase [Source:HGNC Symbol;Acc:HGNC:2898]                                                          |
| RAC2    | ras-related C3 botulinum toxin substrate 2 (rho family, small GTP binding protein Rac2) [Source:HGNC Symbol;Acc:HGNC:9802] |
| TP63    | tumor protein p63 [Source:HGNC Symbol;Acc:HGNC:15979]                                                                      |
| TPD52L1 | tumor protein D52-like 1 [Source:HGNC Symbol;Acc:HGNC:12006]                                                               |
| SCP2    | sterol carrier protein 2 [Source:HGNC Symbol;Acc:HGNC:10606]                                                               |
| RSAD2   | radical S-adenosyl methionine domain containing 2 [Source:HGNC Symbol;Acc:HGNC:30908]                                      |
| SLC5A1  | solute carrier family 5 member 1 [Source:HGNC Symbol;Acc:HGNC:11036]                                                       |
| KRT5    | keratin 5 [Source:HGNC Symbol;Acc:HGNC:6442]                                                                               |
| TGIF1   | TGFB induced factor homeobox 1 [Source:HGNC Symbol;Acc:HGNC:11776]                                                         |
| MSH6    | mutS homolog 6 [Source:HGNC Symbol;Acc:HGNC:7329]                                                                          |
| TES     | testin LIM domain protein [Source:HGNC Symbol;Acc:HGNC:14620]                                                              |
| NDUFS1  | NADH:ubiquinone oxidoreductase core subunit S1 [Source:HGNC Symbol;Acc:HGNC:7707]                                          |
| PTGDS   | prostaglandin D2 synthase [Source:HGNC Symbol;Acc:HGNC:9592]                                                               |
| CTSH    | cathepsin H [Source:HGNC Symbol;Acc:HGNC:2535]                                                                             |
| MAP1B   | microtubule associated protein 1B [Source:HGNC Symbol;Acc:HGNC:6836]                                                       |
| VCL     | vinculin [Source:HGNC Symbol;Acc:HGNC:12665]                                                                               |
| ACSL5   | acyl-CoA synthetase long-chain family member 5 [Source:HGNC Symbol;Acc:HGNC:16526]                                         |
| MUC1    | mucin 1, cell surface associated [Source:HGNC Symbol;Acc:HGNC:7508]                                                        |
| ACSL3   | acyl-CoA synthetase long-chain family member 3 [Source:HGNC Symbol;Acc:HGNC:3570]                                          |
| MGST3   | microsomal glutathione S-transferase 3 [Source:HGNC Symbol;Acc:HGNC:7064]                                                  |
| S100P   | S100 calcium binding protein P [Source:HGNC Symbol;Acc:HGNC:10504]                                                         |
| ACACB   | acetyl-CoA carboxylase beta [Source:HGNC Symbol;Acc:HGNC:85]                                                               |
| PPP1R1B | protein phosphatase 1 regulatory inhibitor subunit 1B [Source:HGNC Symbol;Acc:HGNC:9287]                                   |
| KYNU    | kynureninase [Source:HGNC Symbol;Acc:HGNC:6469]                                                                            |
| SDHA    | succinate dehydrogenase complex flavoprotein subunit A [Source:HGNC Symbol;Acc:HGNC:10680]                                 |
| NFATC1  | nuclear factor of activated T-cells 1 [Source:HGNC Symbol;Acc:HGNC:7775]                                                   |
| SULF2   | sulfatase 2 [Source:HGNC Symbol;Acc:HGNC:20392]                                                                            |
| GPAM    | glycerol-3-phosphate acyltransferase, mitochondrial [Source:HGNC Symbol;Acc:HGNC:24865]                                    |
| CXCL14  | C-X-C motif chemokine ligand 14 [Source:HGNC Symbol;Acc:HGNC:10640]                                                        |
| HSF1    | heat shock transcription factor 1 [Source:HGNC Symbol;Acc:HGNC:5224]                                                       |
| TPM3    | tropomyosin 3 [Source:HGNC Symbol;Acc:HGNC:12012]                                                                          |

|          |                                                                                                                            |
|----------|----------------------------------------------------------------------------------------------------------------------------|
| NEDD9    | neural precursor cell expressed, developmentally down-regulated 9 [Source:HGNC Symbol;Acc:HGNC:7733]                       |
| CCDC175  | coiled-coil domain containing 175 [Source:HGNC Symbol;Acc:HGNC:19847]                                                      |
| WEE1     | WEE1 G2 checkpoint kinase [Source:HGNC Symbol;Acc:HGNC:12761]                                                              |
| BAX      | BCL2 associated X protein [Source:HGNC Symbol;Acc:HGNC:959]                                                                |
| PRKAA1   | protein kinase AMP-activated catalytic subunit alpha 1 [Source:HGNC Symbol;Acc:HGNC:9376]                                  |
| SPANXD   | SPANX family member D [Source:HGNC Symbol;Acc:HGNC:14332]                                                                  |
| ISG15    | ISG15 ubiquitin-like modifier [Source:HGNC Symbol;Acc:HGNC:4053]                                                           |
| CST4     | cystatin S [Source:HGNC Symbol;Acc:HGNC:2476]                                                                              |
| MCM4     | minichromosome maintenance complex component 4 [Source:HGNC Symbol;Acc:HGNC:6947]                                          |
| DNAJB4   | DnaJ heat shock protein family (Hsp40) member B4 [Source:HGNC Symbol;Acc:HGNC:14886]                                       |
| ATP1B1   | ATPase Na <sup>+</sup> /K <sup>+</sup> transporting subunit beta 1 [Source:HGNC Symbol;Acc:HGNC:804]                       |
| CDKN2B   | cyclin dependent kinase inhibitor 2B [Source:HGNC Symbol;Acc:HGNC:1788]                                                    |
| CYP26A1  | cytochrome P450 family 26 subfamily A member 1 [Source:HGNC Symbol;Acc:HGNC:2603]                                          |
| BTG1     | B-cell translocation gene 1, anti-proliferative [Source:HGNC Symbol;Acc:HGNC:1130]                                         |
| S100A6   | S100 calcium binding protein A6 [Source:HGNC Symbol;Acc:HGNC:10496]                                                        |
| TPTE     | transmembrane phosphatase with tensin homology [Source:HGNC Symbol;Acc:HGNC:12023]                                         |
| GSN      | gelsolin [Source:HGNC Symbol;Acc:HGNC:4620]                                                                                |
| VDAC1    | voltage dependent anion channel 1 [Source:HGNC Symbol;Acc:HGNC:12669]                                                      |
| FST      | folistatin [Source:HGNC Symbol;Acc:HGNC:3971]                                                                              |
| G0S2     | G0/G1 switch 2 [Source:HGNC Symbol;Acc:HGNC:30229]                                                                         |
| SLC40A1  | solute carrier family 40 member 1 [Source:HGNC Symbol;Acc:HGNC:10909]                                                      |
| MGLL     | monoglyceride lipase [Source:HGNC Symbol;Acc:HGNC:17038]                                                                   |
| ANXA3    | annexin A3 [Source:HGNC Symbol;Acc:HGNC:541]                                                                               |
| DNAJB1   | DnaJ heat shock protein family (Hsp40) member B1 [Source:HGNC Symbol;Acc:HGNC:5270]                                        |
| CPO      | carboxypeptidase O [Source:HGNC Symbol;Acc:HGNC:21011]                                                                     |
| HMGCS2   | 3-hydroxy-3-methylglutaryl-CoA synthase 2 [Source:HGNC Symbol;Acc:HGNC:5008]                                               |
| KRT19    | keratin 19 [Source:HGNC Symbol;Acc:HGNC:6436]                                                                              |
| RAC1     | ras-related C3 botulinum toxin substrate 1 (rho family, small GTP binding protein Rac1) [Source:HGNC Symbol;Acc:HGNC:9801] |
| CHUK     | conserved helix-loop-helix ubiquitous kinase [Source:HGNC Symbol;Acc:HGNC:1974]                                            |
| MRPL44   | mitochondrial ribosomal protein L44 [Source:HGNC Symbol;Acc:HGNC:16650]                                                    |
| CCNE2    | cyclin E2 [Source:HGNC Symbol;Acc:HGNC:1590]                                                                               |
| EPGN     | epithelial mitogen [Source:HGNC Symbol;Acc:HGNC:17470]                                                                     |
| NRG1     | neuregulin 1 [Source:HGNC Symbol;Acc:HGNC:7997]                                                                            |
| NUPR1    | nuclear protein 1, transcriptional regulator [Source:HGNC Symbol;Acc:HGNC:29990]                                           |
| NT5M     | 5',3'-nucleotidase, mitochondrial [Source:HGNC Symbol;Acc:HGNC:15769]                                                      |
| ZNF91    | zinc finger protein 91 [Source:HGNC Symbol;Acc:HGNC:13166]                                                                 |
| MAOB     | monoamine oxidase B [Source:HGNC Symbol;Acc:HGNC:6834]                                                                     |
| NDUFA4L2 | NADH dehydrogenase (ubiquinone) 1 alpha subcomplex, 4-like 2 [Source:HGNC Symbol;Acc:HGNC:29836]                           |
| SDR16C5  | short chain dehydrogenase/reductase family 16C, member 5 [Source:HGNC Symbol;Acc:HGNC:30311]                               |



|          |                                                                                                               |
|----------|---------------------------------------------------------------------------------------------------------------|
| E2F1     | E2F transcription factor 1 [Source:HGNC Symbol;Acc:HGNC:3113]                                                 |
| ZNF33B   | zinc finger protein 33B [Source:HGNC Symbol;Acc:HGNC:13097]                                                   |
| PPP1R15A | protein phosphatase 1 regulatory subunit 15A [Source:HGNC Symbol;Acc:HGNC:14375]                              |
| SUSD5    | sushi domain containing 5 [Source:HGNC Symbol;Acc:HGNC:29061]                                                 |
| ANXA1    | annexin A1 [Source:HGNC Symbol;Acc:HGNC:533]                                                                  |
| GSTM3    | glutathione S-transferase mu 3 (brain) [Source:HGNC Symbol;Acc:HGNC:4635]                                     |
| MSANTD4  | Myb/SANT DNA binding domain containing 4 with coiled-coils [Source:HGNC Symbol;Acc:HGNC:29383]                |
| RRM2     | ribonucleotide reductase regulatory subunit M2 [Source:HGNC Symbol;Acc:HGNC:10452]                            |
| MXRA5    | matrix remodeling associated 5 [Source:HGNC Symbol;Acc:HGNC:7539]                                             |
| SP1      | Sp1 transcription factor [Source:HGNC Symbol;Acc:HGNC:11205]                                                  |
| CD209    | CD209 molecule [Source:HGNC Symbol;Acc:HGNC:1641]                                                             |
| TDP2     | tyrosyl-DNA phosphodiesterase 2 [Source:HGNC Symbol;Acc:HGNC:17768]                                           |
| KLK7     | kallikrein related peptidase 7 [Source:HGNC Symbol;Acc:HGNC:6368]                                             |
| FTH1     | ferritin heavy chain 1 [Source:HGNC Symbol;Acc:HGNC:3976]                                                     |
| DSG1     | desmoglein 1 [Source:HGNC Symbol;Acc:HGNC:3048]                                                               |
| POU1F1   | POU class 1 homeobox 1 [Source:HGNC Symbol;Acc:HGNC:9210]                                                     |
| SCD      | stearoyl-CoA desaturase [Source:HGNC Symbol;Acc:HGNC:10571]                                                   |
| CSTF2T   | cleavage stimulation factor subunit 2, tau variant [Source:HGNC Symbol;Acc:HGNC:17086]                        |
| GADD45B  | growth arrest and DNA damage inducible beta [Source:HGNC Symbol;Acc:HGNC:4096]                                |
| KRAS     | KRAS proto-oncogene, GTPase [Source:HGNC Symbol;Acc:HGNC:6407]                                                |
| MGMT     | O-6-methylguanine-DNA methyltransferase [Source:HGNC Symbol;Acc:HGNC:7059]                                    |
| PIGU     | phosphatidylinositol glycan anchor biosynthesis class U [Source:HGNC Symbol;Acc:HGNC:15791]                   |
| DOK7     | docking protein 7 [Source:HGNC Symbol;Acc:HGNC:26594]                                                         |
| FANCF    | Fanconi anemia complementation group F [Source:HGNC Symbol;Acc:HGNC:3587]                                     |
| AKR1C3   | aldo-keto reductase family 1 member C3 [Source:HGNC Symbol;Acc:HGNC:386]                                      |
| ALOX5    | arachidonate 5-lipoxygenase [Source:HGNC Symbol;Acc:HGNC:435]                                                 |
| ATG101   | autophagy related 101 [Source:HGNC Symbol;Acc:HGNC:25679]                                                     |
| ATP6V1B1 | ATPase H <sup>+</sup> transporting V1 subunit B1 [Source:HGNC Symbol;Acc:HGNC:853]                            |
| IKBKB    | inhibitor of kappa light polypeptide gene enhancer in B-cells, kinase beta [Source:HGNC Symbol;Acc:HGNC:5960] |
| GSTA4    | glutathione S-transferase alpha 4 [Source:HGNC Symbol;Acc:HGNC:4629]                                          |
| INTS5    | integrator complex subunit 5 [Source:HGNC Symbol;Acc:HGNC:29352]                                              |
| TMEM60   | transmembrane protein 60 [Source:HGNC Symbol;Acc:HGNC:21754]                                                  |
| IL1RN    | interleukin 1 receptor antagonist [Source:HGNC Symbol;Acc:HGNC:6000]                                          |
| TMPRSS3  | transmembrane protease, serine 3 [Source:HGNC Symbol;Acc:HGNC:11877]                                          |
| YIF1B    | Yip1 interacting factor homolog B, membrane trafficking protein [Source:HGNC Symbol;Acc:HGNC:30511]           |
| ULBP2    | UL16 binding protein 2 [Source:HGNC Symbol;Acc:HGNC:14894]                                                    |
| ZNF467   | zinc finger protein 467 [Source:HGNC Symbol;Acc:HGNC:23154]                                                   |
| HES4     | hes family bHLH transcription factor 4 [Source:HGNC Symbol;Acc:HGNC:24149]                                    |
| ARID3B   | AT-rich interaction domain 3B [Source:HGNC Symbol;Acc:HGNC:14350]                                             |

|          |                                                                                                     |
|----------|-----------------------------------------------------------------------------------------------------|
| CPNE7    | copine 7 [Source:HGNC Symbol;Acc:HGNC:2320]                                                         |
| NUP62CL  | nucleoporin 62 C-terminal like [Source:HGNC Symbol;Acc:HGNC:25960]                                  |
| POLR2D   | polymerase (RNA) II subunit D [Source:HGNC Symbol;Acc:HGNC:9191]                                    |
| SCML2    | sex comb on midleg-like 2 (Drosophila) [Source:HGNC Symbol;Acc:HGNC:10581]                          |
| ZNF462   | zinc finger protein 462 [Source:HGNC Symbol;Acc:HGNC:21684]                                         |
| NEIL2    | nei like DNA glycosylase 2 [Source:HGNC Symbol;Acc:HGNC:18956]                                      |
| OLAH     | oleoyl-ACP hydrolase [Source:HGNC Symbol;Acc:HGNC:25625]                                            |
| DCTN6    | dynactin subunit 6 [Source:HGNC Symbol;Acc:HGNC:16964]                                              |
| NPAS3    | neuronal PAS domain protein 3 [Source:HGNC Symbol;Acc:HGNC:19311]                                   |
| ZNF385B  | zinc finger protein 385B [Source:HGNC Symbol;Acc:HGNC:26332]                                        |
| ARL6     | ADP ribosylation factor like GTPase 6 [Source:HGNC Symbol;Acc:HGNC:13210]                           |
| LRRC34   | leucine rich repeat containing 34 [Source:HGNC Symbol;Acc:HGNC:28408]                               |
| PRSS16   | protease, serine 16 [Source:HGNC Symbol;Acc:HGNC:9480]                                              |
| DCTN3    | dynactin subunit 3 [Source:HGNC Symbol;Acc:HGNC:2713]                                               |
| LY6K     | lymphocyte antigen 6 complex, locus K [Source:HGNC Symbol;Acc:HGNC:24225]                           |
| PRR15L   | proline rich 15 like [Source:HGNC Symbol;Acc:HGNC:28149]                                            |
| UPK1B    | uroplakin 1B [Source:HGNC Symbol;Acc:HGNC:12578]                                                    |
| SLC26A11 | solute carrier family 26 member 11 [Source:HGNC Symbol;Acc:HGNC:14471]                              |
| DERL2    | derlin 2 [Source:HGNC Symbol;Acc:HGNC:17943]                                                        |
| MS4A6A   | membrane spanning 4-domains A6A [Source:HGNC Symbol;Acc:HGNC:13375]                                 |
| BTC      | betacellulin [Source:HGNC Symbol;Acc:HGNC:1121]                                                     |
| SCEL     | sciellin [Source:HGNC Symbol;Acc:HGNC:10573]                                                        |
| CISD2    | CDGSH iron sulfur domain 2 [Source:HGNC Symbol;Acc:HGNC:24212]                                      |
| MRPS16   | mitochondrial ribosomal protein S16 [Source:HGNC Symbol;Acc:HGNC:14048]                             |
| MSI1     | musashi RNA binding protein 1 [Source:HGNC Symbol;Acc:HGNC:7330]                                    |
| WBP11    | WW domain binding protein 11 [Source:HGNC Symbol;Acc:HGNC:16461]                                    |
| HOXC6    | homeobox C6 [Source:HGNC Symbol;Acc:HGNC:5128]                                                      |
| WAS      | Wiskott-Aldrich syndrome [Source:HGNC Symbol;Acc:HGNC:12731]                                        |
| GXYLT1   | glucoside xylosyltransferase 1 [Source:HGNC Symbol;Acc:HGNC:27482]                                  |
| KLK10    | kallikrein related peptidase 10 [Source:HGNC Symbol;Acc:HGNC:6358]                                  |
| KRT6A    | keratin 6A [Source:HGNC Symbol;Acc:HGNC:6443]                                                       |
| OGFOD1   | 2-oxoglutarate and iron dependent oxygenase domain containing 1 [Source:HGNC Symbol;Acc:HGNC:25585] |
| CHRNA4   | cholinergic receptor nicotinic delta subunit [Source:HGNC Symbol;Acc:HGNC:1965]                     |
| PLAU     | plasminogen activator, urokinase [Source:HGNC Symbol;Acc:HGNC:9052]                                 |
| GTF3A    | general transcription factor IIIA [Source:HGNC Symbol;Acc:HGNC:4662]                                |
| MYF5     | myogenic factor 5 [Source:HGNC Symbol;Acc:HGNC:7565]                                                |
| RRAGA    | Ras related GTP binding A [Source:HGNC Symbol;Acc:HGNC:16963]                                       |
| PARVB    | parvin beta [Source:HGNC Symbol;Acc:HGNC:14653]                                                     |
| PKP3     | plakophilin 3 [Source:HGNC Symbol;Acc:HGNC:9025]                                                    |
| SAMD5    | sterile alpha motif domain containing 5 [Source:HGNC Symbol;Acc:HGNC:21180]                         |
| AP1S3    | adaptor related protein complex 1 sigma 3 subunit [Source:HGNC Symbol;Acc:HGNC:18971]               |

|          |                                                                                            |
|----------|--------------------------------------------------------------------------------------------|
| ADH1B    | alcohol dehydrogenase 1B (class I), beta polypeptide [Source:HGNC Symbol;Acc:HGNC:250]     |
| TMSB15A  | thymosin beta 15a [Source:HGNC Symbol;Acc:HGNC:30744]                                      |
| CHST8    | carbohydrate sulfotransferase 8 [Source:HGNC Symbol;Acc:HGNC:15993]                        |
| WWP2     | WW domain containing E3 ubiquitin protein ligase 2 [Source:HGNC Symbol;Acc:HGNC:16804]     |
| CNOT7    | CCR4-NOT transcription complex subunit 7 [Source:HGNC Symbol;Acc:HGNC:14101]               |
| RBM34    | RNA binding motif protein 34 [Source:HGNC Symbol;Acc:HGNC:28965]                           |
| CYB5R2   | cytochrome b5 reductase 2 [Source:HGNC Symbol;Acc:HGNC:24376]                              |
| GIT2     | GIT ArfGAP 2 [Source:HGNC Symbol;Acc:HGNC:4273]                                            |
| NDUFB7   | NADH:ubiquinone oxidoreductase subunit B7 [Source:HGNC Symbol;Acc:HGNC:7702]               |
| FUT1     | fucosyltransferase 1 (H blood group) [Source:HGNC Symbol;Acc:HGNC:4012]                    |
| CAPZA2   | capping actin protein of muscle Z-line alpha subunit 2 [Source:HGNC Symbol;Acc:HGNC:1490]  |
| MANSC1   | MANSC domain containing 1 [Source:HGNC Symbol;Acc:HGNC:25505]                              |
| KRR1     | KRR1, small subunit processome component homolog [Source:HGNC Symbol;Acc:HGNC:5176]        |
| GSTA2    | glutathione S-transferase alpha 2 [Source:HGNC Symbol;Acc:HGNC:4627]                       |
| NUDT16L1 | nudix hydrolase 16 like 1 [Source:HGNC Symbol;Acc:HGNC:28154]                              |
| ORMDL2   | ORMDL sphingolipid biosynthesis regulator 2 [Source:HGNC Symbol;Acc:HGNC:16037]            |
| HYI      | hydroxypyruvate isomerase (putative) [Source:HGNC Symbol;Acc:HGNC:26948]                   |
| MPV17L   | MPV17 mitochondrial inner membrane protein like [Source:HGNC Symbol;Acc:HGNC:26827]        |
| CPT1A    | carnitine palmitoyltransferase 1A [Source:HGNC Symbol;Acc:HGNC:2328]                       |
| IL12B    | interleukin 12B [Source:HGNC Symbol;Acc:HGNC:5970]                                         |
| RPS6KB1  | ribosomal protein S6 kinase B1 [Source:HGNC Symbol;Acc:HGNC:10436]                         |
| CYYR1    | cysteine and tyrosine rich 1 [Source:HGNC Symbol;Acc:HGNC:16274]                           |
| SERTAD4  | SERTA domain containing 4 [Source:HGNC Symbol;Acc:HGNC:25236]                              |
| ALYREF   | Aly/REF export factor [Source:HGNC Symbol;Acc:HGNC:19071]                                  |
| LRR1     | leucine rich repeat protein 1 [Source:HGNC Symbol;Acc:HGNC:19742]                          |
| TSPAN31  | tetraspanin 31 [Source:HGNC Symbol;Acc:HGNC:10539]                                         |
| FN3K     | fructosamine 3 kinase [Source:HGNC Symbol;Acc:HGNC:24822]                                  |
| SLC30A4  | solute carrier family 30 member 4 [Source:HGNC Symbol;Acc:HGNC:11015]                      |
| GSTA1    | glutathione S-transferase alpha 1 [Source:HGNC Symbol;Acc:HGNC:4626]                       |
| AP2A1    | adaptor related protein complex 2 alpha 1 subunit [Source:HGNC Symbol;Acc:HGNC:561]        |
| SLC39A1  | solute carrier family 39 member 1 [Source:HGNC Symbol;Acc:HGNC:12876]                      |
| OGDHL    | oxoglutarate dehydrogenase-like [Source:HGNC Symbol;Acc:HGNC:25590]                        |
| COMMD10  | COMM domain containing 10 [Source:HGNC Symbol;Acc:HGNC:30201]                              |
| NEIL1    | nei like DNA glycosylase 1 [Source:HGNC Symbol;Acc:HGNC:18448]                             |
| HSPA1A   | heat shock protein family A (Hsp70) member 1A [Source:HGNC Symbol;Acc:HGNC:5232]           |
| SF3B3    | splicing factor 3b subunit 3 [Source:HGNC Symbol;Acc:HGNC:10770]                           |
| PPP1R14C | protein phosphatase 1 regulatory inhibitor subunit 14C [Source:HGNC Symbol;Acc:HGNC:14952] |
| RAB25    | RAB25, member RAS oncogene family [Source:HGNC Symbol;Acc:HGNC:18238]                      |
| CYBRD1   | cytochrome b reductase 1 [Source:HGNC Symbol;Acc:HGNC:20797]                               |
| FNTB     | farnesyltransferase, CAAX box, beta [Source:HGNC Symbol;Acc:HGNC:3785]                     |
| MRT04    | MRT4 homolog, ribosome maturation factor [Source:HGNC Symbol;Acc:HGNC:18477]               |

|           |                                                                                                                            |
|-----------|----------------------------------------------------------------------------------------------------------------------------|
| TWIST2    | twist family bHLH transcription factor 2 [Source:HGNC Symbol;Acc:HGNC:20670]                                               |
| SPP2      | secreted phosphoprotein 2 [Source:HGNC Symbol;Acc:HGNC:11256]                                                              |
| OASL      | 2'-5'-oligoadenylate synthetase like [Source:HGNC Symbol;Acc:HGNC:8090]                                                    |
| GDPD3     | glycerophosphodiester phosphodiesterase domain containing 3 [Source:HGNC Symbol;Acc:HGNC:28638]                            |
| PLEKHF2   | pleckstrin homology and FYVE domain containing 2 [Source:HGNC Symbol;Acc:HGNC:20757]                                       |
| SEC14L1   | SEC14 like lipid binding 1 [Source:HGNC Symbol;Acc:HGNC:10698]                                                             |
| TRIM13    | tripartite motif containing 13 [Source:HGNC Symbol;Acc:HGNC:9976]                                                          |
| ADH7      | alcohol dehydrogenase 7 (class IV), mu or sigma polypeptide [Source:HGNC Symbol;Acc:HGNC:256]                              |
| FAHD1     | fumarylacetoacetate hydrolase domain containing 1 [Source:HGNC Symbol;Acc:HGNC:14169]                                      |
| FAM102B   | family with sequence similarity 102 member B [Source:HGNC Symbol;Acc:HGNC:27637]                                           |
| CERS4     | ceramide synthase 4 [Source:HGNC Symbol;Acc:HGNC:23747]                                                                    |
| DNASE2    | deoxyribonuclease II, lysosomal [Source:HGNC Symbol;Acc:HGNC:2960]                                                         |
| GLMP      | glycosylated lysosomal membrane protein [Source:HGNC Symbol;Acc:HGNC:29436]                                                |
| HLA-F     | major histocompatibility complex, class I, F [Source:HGNC Symbol;Acc:HGNC:4963]                                            |
| TMX4      | thioredoxin related transmembrane protein 4 [Source:HGNC Symbol;Acc:HGNC:25237]                                            |
| RAB11FIP1 | RAB11 family interacting protein 1 [Source:HGNC Symbol;Acc:HGNC:30265]                                                     |
| GABARAP   | GABA type A receptor-associated protein [Source:HGNC Symbol;Acc:HGNC:4067]                                                 |
| RAC3      | ras-related C3 botulinum toxin substrate 3 (rho family, small GTP binding protein Rac3) [Source:HGNC Symbol;Acc:HGNC:9803] |
| SPATA20   | spermatogenesis associated 20 [Source:HGNC Symbol;Acc:HGNC:26125]                                                          |
| CD3D      | CD3d molecule [Source:HGNC Symbol;Acc:HGNC:1673]                                                                           |
| ALDH1A1   | aldehyde dehydrogenase 1 family member A1 [Source:HGNC Symbol;Acc:HGNC:402]                                                |
| GP1BB     | glycoprotein Ib platelet beta subunit [Source:HGNC Symbol;Acc:HGNC:4440]                                                   |
| HNRNP2    | heterogeneous nuclear ribonucleoprotein H2 (H') [Source:HGNC Symbol;Acc:HGNC:5042]                                         |
| SYTL5     | synaptotagmin like 5 [Source:HGNC Symbol;Acc:HGNC:15589]                                                                   |
| TSEN15    | tRNA splicing endonuclease subunit 15 [Source:HGNC Symbol;Acc:HGNC:16791]                                                  |
| SLC35F2   | solute carrier family 35 member F2 [Source:HGNC Symbol;Acc:HGNC:23615]                                                     |
| FABP6     | fatty acid binding protein 6 [Source:HGNC Symbol;Acc:HGNC:3561]                                                            |
| PIK3C2B   | phosphatidylinositol-4-phosphate 3-kinase catalytic subunit type 2 beta [Source:HGNC Symbol;Acc:HGNC:8972]                 |
| BEX4      | brain expressed X-linked 4 [Source:HGNC Symbol;Acc:HGNC:25475]                                                             |
| COX11     | COX11 cytochrome c oxidase copper chaperone [Source:HGNC Symbol;Acc:HGNC:2261]                                             |
| SLC6A14   | solute carrier family 6 member 14 [Source:HGNC Symbol;Acc:HGNC:11047]                                                      |
| SYTL4     | synaptotagmin like 4 [Source:HGNC Symbol;Acc:HGNC:15588]                                                                   |
| TIMM23    | translocase of inner mitochondrial membrane 23 [Source:HGNC Symbol;Acc:HGNC:17312]                                         |
| KLK8      | kallikrein related peptidase 8 [Source:HGNC Symbol;Acc:HGNC:6369]                                                          |
| SERPINA5  | serpin family A member 5 [Source:HGNC Symbol;Acc:HGNC:8723]                                                                |
| BCHE      | butyrylcholinesterase [Source:HGNC Symbol;Acc:HGNC:983]                                                                    |
| AIF1L     | allograft inflammatory factor 1 like [Source:HGNC Symbol;Acc:HGNC:28904]                                                   |
| ARPC4     | actin related protein 2/3 complex subunit 4 [Source:HGNC Symbol;Acc:HGNC:707]                                              |
| ASH1L     | ASH1 like histone lysine methyltransferase [Source:HGNC Symbol;Acc:HGNC:19088]                                             |

|            |                                                                                                          |
|------------|----------------------------------------------------------------------------------------------------------|
| DDX18      | DEAD-box helicase 18 [Source:HGNC Symbol;Acc:HGNC:2741]                                                  |
| HRG        | histidine rich glycoprotein [Source:HGNC Symbol;Acc:HGNC:5181]                                           |
| MCCC1      | methylcrotonoyl-CoA carboxylase 1 [Source:HGNC Symbol;Acc:HGNC:6936]                                     |
| ST6GALNAC2 | ST6 N-acetylgalactosaminide alpha-2,6-sialyltransferase 2 [Source:HGNC Symbol;Acc:HGNC:10867]            |
| TMC5       | transmembrane channel like 5 [Source:HGNC Symbol;Acc:HGNC:22999]                                         |
| RNF19B     | ring finger protein 19B [Source:HGNC Symbol;Acc:HGNC:26886]                                              |
| GPM6B      | glycoprotein M6B [Source:HGNC Symbol;Acc:HGNC:4461]                                                      |
| FGF4       | fibroblast growth factor 4 [Source:HGNC Symbol;Acc:HGNC:3682]                                            |
| MRPL13     | mitochondrial ribosomal protein L13 [Source:HGNC Symbol;Acc:HGNC:14278]                                  |
| MRPL4      | mitochondrial ribosomal protein L4 [Source:HGNC Symbol;Acc:HGNC:14276]                                   |
| USP47      | ubiquitin specific peptidase 47 [Source:HGNC Symbol;Acc:HGNC:20076]                                      |
| VAMP5      | vesicle associated membrane protein 5 [Source:HGNC Symbol;Acc:HGNC:12646]                                |
| DMKN       | dermokine [Source:HGNC Symbol;Acc:HGNC:25063]                                                            |
| ERMP1      | endoplasmic reticulum metallopeptidase 1 [Source:HGNC Symbol;Acc:HGNC:23703]                             |
| FLOT1      | flotillin 1 [Source:HGNC Symbol;Acc:HGNC:3757]                                                           |
| PDHX       | pyruvate dehydrogenase complex component X [Source:HGNC Symbol;Acc:HGNC:21350]                           |
| SAC3D1     | SAC3 domain containing 1 [Source:HGNC Symbol;Acc:HGNC:30179]                                             |
| SCAMP5     | secretory carrier membrane protein 5 [Source:HGNC Symbol;Acc:HGNC:30386]                                 |
| SNRPA      | small nuclear ribonucleoprotein polypeptide A [Source:HGNC Symbol;Acc:HGNC:11151]                        |
| TNK2       | tyrosine kinase non receptor 2 [Source:HGNC Symbol;Acc:HGNC:19297]                                       |
| REEP1      | receptor accessory protein 1 [Source:HGNC Symbol;Acc:HGNC:25786]                                         |
| PTGS1      | prostaglandin-endoperoxide synthase 1 [Source:HGNC Symbol;Acc:HGNC:9604]                                 |
| C1QTNF6    | C1q and tumor necrosis factor related protein 6 [Source:HGNC Symbol;Acc:HGNC:14343]                      |
| PAG1       | phosphoprotein membrane anchor with glycosphingolipid microdomains 1 [Source:HGNC Symbol;Acc:HGNC:30043] |
| NDUFB5     | NADH:ubiquinone oxidoreductase subunit B5 [Source:HGNC Symbol;Acc:HGNC:7700]                             |
| FXN        | frataxin [Source:HGNC Symbol;Acc:HGNC:3951]                                                              |
| NDUFV1     | NADH:ubiquinone oxidoreductase core subunit V1 [Source:HGNC Symbol;Acc:HGNC:7716]                        |
| OAS1       | 2'-5'-oligoadenylate synthetase 1 [Source:HGNC Symbol;Acc:HGNC:8086]                                     |
| COLEC12    | collectin subfamily member 12 [Source:HGNC Symbol;Acc:HGNC:16016]                                        |
| PDZD2      | PDZ domain containing 2 [Source:HGNC Symbol;Acc:HGNC:18486]                                              |
| TMEM47     | transmembrane protein 47 [Source:HGNC Symbol;Acc:HGNC:18515]                                             |
| GALNT7     | polypeptide N-acetylgalactosaminyltransferase 7 [Source:HGNC Symbol;Acc:HGNC:4129]                       |
| FAM20C     | family with sequence similarity 20 member C [Source:HGNC Symbol;Acc:HGNC:22140]                          |
| PHTF2      | putative homeodomain transcription factor 2 [Source:HGNC Symbol;Acc:HGNC:13411]                          |
| CCNT2      | cyclin T2 [Source:HGNC Symbol;Acc:HGNC:1600]                                                             |
| EIF2B4     | eukaryotic translation initiation factor 2B subunit delta [Source:HGNC Symbol;Acc:HGNC:3260]             |
| ABCC1      | ATP binding cassette subfamily C member 1 [Source:HGNC Symbol;Acc:HGNC:51]                               |
| MASTL      | microtubule associated serine/threonine kinase like [Source:HGNC Symbol;Acc:HGNC:19042]                  |
| WNT5B      | Wnt family member 5B [Source:HGNC Symbol;Acc:HGNC:16265]                                                 |
| SKA1       | spindle and kinetochore associated complex subunit 1 [Source:HGNC Symbol;Acc:HGNC:28109]                 |

|           |                                                                                           |
|-----------|-------------------------------------------------------------------------------------------|
| COX7A1    | cytochrome c oxidase subunit 7A1 [Source:HGNC Symbol;Acc:HGNC:2287]                       |
| PLPP2     | phospholipid phosphatase 2 [Source:HGNC Symbol;Acc:HGNC:9230]                             |
| ELF1      | E74 like ETS transcription factor 1 [Source:HGNC Symbol;Acc:HGNC:3316]                    |
| AP2B1     | adaptor related protein complex 2 beta 1 subunit [Source:HGNC Symbol;Acc:HGNC:563]        |
| DAXX      | death-domain associated protein [Source:HGNC Symbol;Acc:HGNC:2681]                        |
| FBXO3     | F-box protein 3 [Source:HGNC Symbol;Acc:HGNC:13582]                                       |
| KDM6A     | lysine demethylase 6A [Source:HGNC Symbol;Acc:HGNC:12637]                                 |
| TCF7L1    | transcription factor 7 like 1 [Source:HGNC Symbol;Acc:HGNC:11640]                         |
| BIN1      | bridging integrator 1 [Source:HGNC Symbol;Acc:HGNC:1052]                                  |
| DNER      | delta/notch like EGF repeat containing [Source:HGNC Symbol;Acc:HGNC:24456]                |
| RTP4      | receptor transporter protein 4 [Source:HGNC Symbol;Acc:HGNC:23992]                        |
| ANTXR1    | anthrax toxin receptor 1 [Source:HGNC Symbol;Acc:HGNC:21014]                              |
| GAS2L3    | growth arrest specific 2 like 3 [Source:HGNC Symbol;Acc:HGNC:27475]                       |
| NDUFB3    | NADH:ubiquinone oxidoreductase subunit B3 [Source:HGNC Symbol;Acc:HGNC:7698]              |
| PCP4      | Purkinje cell protein 4 [Source:HGNC Symbol;Acc:HGNC:8742]                                |
| GRHL1     | grainyhead like transcription factor 1 [Source:HGNC Symbol;Acc:HGNC:17923]                |
| ACP1      | acid phosphatase 1, soluble [Source:HGNC Symbol;Acc:HGNC:122]                             |
| BLVRA     | biliverdin reductase A [Source:HGNC Symbol;Acc:HGNC:1062]                                 |
| COX7A2    | cytochrome c oxidase subunit 7A2 [Source:HGNC Symbol;Acc:HGNC:2288]                       |
| DHRS4     | dehydrogenase/reductase 4 [Source:HGNC Symbol;Acc:HGNC:16985]                             |
| RNF4      | ring finger protein 4 [Source:HGNC Symbol;Acc:HGNC:10067]                                 |
| RPLP2     | ribosomal protein lateral stalk subunit P2 [Source:HGNC Symbol;Acc:HGNC:10377]            |
| GALNT3    | polypeptide N-acetylgalactosaminyltransferase 3 [Source:HGNC Symbol;Acc:HGNC:4125]        |
| SCT       | secretin [Source:HGNC Symbol;Acc:HGNC:10607]                                              |
| DSG2      | desmoglein 2 [Source:HGNC Symbol;Acc:HGNC:3049]                                           |
| ELOVL7    | ELOVL fatty acid elongase 7 [Source:HGNC Symbol;Acc:HGNC:26292]                           |
| HILPDA    | hypoxia inducible lipid droplet associated [Source:HGNC Symbol;Acc:HGNC:28859]            |
| RASA3     | RAS p21 protein activator 3 [Source:HGNC Symbol;Acc:HGNC:20331]                           |
| CFL2      | cofilin 2 [Source:HGNC Symbol;Acc:HGNC:1875]                                              |
| COBL      | cordon-bleu WH2 repeat protein [Source:HGNC Symbol;Acc:HGNC:22199]                        |
| CTHRC1    | collagen triple helix repeat containing 1 [Source:HGNC Symbol;Acc:HGNC:18831]             |
| IRF3      | interferon regulatory factor 3 [Source:HGNC Symbol;Acc:HGNC:6118]                         |
| MYH14     | myosin, heavy chain 14, non-muscle [Source:HGNC Symbol;Acc:HGNC:23212]                    |
| SLC16A12  | solute carrier family 16 member 12 [Source:HGNC Symbol;Acc:HGNC:23094]                    |
| TNFRSF10D | tumor necrosis factor receptor superfamily member 10d [Source:HGNC Symbol;Acc:HGNC:11907] |
| SLC10A2   | solute carrier family 10 member 2 [Source:HGNC Symbol;Acc:HGNC:10906]                     |
| CCDC88A   | coiled-coil domain containing 88A [Source:HGNC Symbol;Acc:HGNC:25523]                     |
| FOXC2     | forkhead box C2 [Source:HGNC Symbol;Acc:HGNC:3801]                                        |
| ITGB3BP   | integrin subunit beta 3 binding protein [Source:HGNC Symbol;Acc:HGNC:6157]                |
| PCCB      | propionyl-CoA carboxylase beta subunit [Source:HGNC Symbol;Acc:HGNC:8654]                 |
| PPID      | peptidylprolyl isomerase D [Source:HGNC Symbol;Acc:HGNC:9257]                             |

|         |                                                                                                     |
|---------|-----------------------------------------------------------------------------------------------------|
| SLC26A2 | solute carrier family 26 member 2 [Source:HGNC Symbol;Acc:HGNC:10994]                               |
| THPO    | thrombopoietin [Source:HGNC Symbol;Acc:HGNC:11795]                                                  |
| TMTC2   | transmembrane and tetratricopeptide repeat containing 2 [Source:HGNC Symbol;Acc:HGNC:25440]         |
| KCNK5   | potassium two pore domain channel subfamily K member 5 [Source:HGNC Symbol;Acc:HGNC:6280]           |
| MLLT11  | myeloid/lymphoid or mixed-lineage leukemia; translocated to, 11 [Source:HGNC Symbol;Acc:HGNC:16997] |
| NR5A2   | nuclear receptor subfamily 5 group A member 2 [Source:HGNC Symbol;Acc:HGNC:7984]                    |
| CTF1    | cardiotrophin 1 [Source:HGNC Symbol;Acc:HGNC:2499]                                                  |
| KIF14   | kinesin family member 14 [Source:HGNC Symbol;Acc:HGNC:19181]                                        |
| PCSK1   | proprotein convertase subtilisin/kexin type 1 [Source:HGNC Symbol;Acc:HGNC:8743]                    |
| SMTN    | smoothelin [Source:HGNC Symbol;Acc:HGNC:11126]                                                      |
| TINF2   | TERF1 interacting nuclear factor 2 [Source:HGNC Symbol;Acc:HGNC:11824]                              |
| SESN3   | sestrin 3 [Source:HGNC Symbol;Acc:HGNC:23060]                                                       |
| ACKR3   | atypical chemokine receptor 3 [Source:HGNC Symbol;Acc:HGNC:23692]                                   |
| BTF3    | basic transcription factor 3 [Source:HGNC Symbol;Acc:HGNC:1125]                                     |
| CLCA1   | chloride channel accessory 1 [Source:HGNC Symbol;Acc:HGNC:2015]                                     |
| DGKA    | diacylglycerol kinase alpha [Source:HGNC Symbol;Acc:HGNC:2849]                                      |
| KDM5B   | lysine demethylase 5B [Source:HGNC Symbol;Acc:HGNC:18039]                                           |
| NMU     | neuromedin U [Source:HGNC Symbol;Acc:HGNC:7859]                                                     |
| TRA2A   | transformer 2 alpha homolog [Source:HGNC Symbol;Acc:HGNC:16645]                                     |
| BACE2   | beta-site APP-cleaving enzyme 2 [Source:HGNC Symbol;Acc:HGNC:934]                                   |
| EPB41L5 | erythrocyte membrane protein band 4.1 like 5 [Source:HGNC Symbol;Acc:HGNC:19819]                    |
| CEL     | carboxyl ester lipase [Source:HGNC Symbol;Acc:HGNC:1848]                                            |
| DSTN    | destinin, actin depolymerizing factor [Source:HGNC Symbol;Acc:HGNC:15750]                           |
| NDUFA1  | NADH:ubiquinone oxidoreductase subunit A1 [Source:HGNC Symbol;Acc:HGNC:7683]                        |
| SRSF11  | serine and arginine rich splicing factor 11 [Source:HGNC Symbol;Acc:HGNC:10782]                     |
| FBLIM1  | filamin binding LIM protein 1 [Source:HGNC Symbol;Acc:HGNC:24686]                                   |
| DUSP3   | dual specificity phosphatase 3 [Source:HGNC Symbol;Acc:HGNC:3069]                                   |
| CAPNS1  | calpain small subunit 1 [Source:HGNC Symbol;Acc:HGNC:1481]                                          |
| CENPM   | centromere protein M [Source:HGNC Symbol;Acc:HGNC:18352]                                            |
| MT-CO3  | mitochondrially encoded cytochrome c oxidase III [Source:HGNC Symbol;Acc:HGNC:7422]                 |
| ECI2    | enoyl-CoA delta isomerase 2 [Source:HGNC Symbol;Acc:HGNC:14601]                                     |
| IDS     | iduronate 2-sulfatase [Source:HGNC Symbol;Acc:HGNC:5389]                                            |
| MTA1    | metastasis associated 1 [Source:HGNC Symbol;Acc:HGNC:7410]                                          |
| POLD3   | polymerase (DNA) delta 3, accessory subunit [Source:HGNC Symbol;Acc:HGNC:20932]                     |
| TOPBP1  | topoisomerase (DNA) II binding protein 1 [Source:HGNC Symbol;Acc:HGNC:17008]                        |
| AZGP1   | alpha-2-glycoprotein 1, zinc-binding [Source:HGNC Symbol;Acc:HGNC:910]                              |
| OAS2    | 2'-5'-oligoadenylate synthetase 2 [Source:HGNC Symbol;Acc:HGNC:8087]                                |
| PRF1    | perforin 1 [Source:HGNC Symbol;Acc:HGNC:9360]                                                       |
| EXOSC2  | exosome component 2 [Source:HGNC Symbol;Acc:HGNC:17097]                                             |

|         |                                                                                                |
|---------|------------------------------------------------------------------------------------------------|
| NDE1    | nudE neurodevelopment protein 1 [Source:HGNC Symbol;Acc:HGNC:17619]                            |
| RBM25   | RNA binding motif protein 25 [Source:HGNC Symbol;Acc:HGNC:23244]                               |
| RNF144B | ring finger protein 144B [Source:HGNC Symbol;Acc:HGNC:21578]                                   |
| G2E3    | G2/M-phase specific E3 ubiquitin protein ligase [Source:HGNC Symbol;Acc:HGNC:20338]            |
| NEBL    | nebulette [Source:HGNC Symbol;Acc:HGNC:16932]                                                  |
| MAPK9   | mitogen-activated protein kinase 9 [Source:HGNC Symbol;Acc:HGNC:6886]                          |
| RAB32   | RAB32, member RAS oncogene family [Source:HGNC Symbol;Acc:HGNC:9772]                           |
| RPL32   | ribosomal protein L32 [Source:HGNC Symbol;Acc:HGNC:10336]                                      |
| DNAJA4  | DnaJ heat shock protein family (Hsp40) member A4 [Source:HGNC Symbol;Acc:HGNC:14885]           |
| HIBADH  | 3-hydroxyisobutyrate dehydrogenase [Source:HGNC Symbol;Acc:HGNC:4907]                          |
| YPEL2   | yippee like 2 [Source:HGNC Symbol;Acc:HGNC:18326]                                              |
| PSMD14  | proteasome 26S subunit, non-ATPase 14 [Source:HGNC Symbol;Acc:HGNC:16889]                      |
| SAA2    | serum amyloid A2 [Source:HGNC Symbol;Acc:HGNC:10514]                                           |
| SNAP23  | synaptosome associated protein 23 [Source:HGNC Symbol;Acc:HGNC:11131]                          |
| MAP3K7  | mitogen-activated protein kinase kinase kinase 7 [Source:HGNC Symbol;Acc:HGNC:6859]            |
| LGR5    | leucine rich repeat containing G protein-coupled receptor 5 [Source:HGNC Symbol;Acc:HGNC:4504] |
| NFE2L3  | nuclear factor, erythroid 2 like 3 [Source:HGNC Symbol;Acc:HGNC:7783]                          |
| SYTL2   | synaptotagmin like 2 [Source:HGNC Symbol;Acc:HGNC:15585]                                       |
| POLB    | polymerase (DNA) beta [Source:HGNC Symbol;Acc:HGNC:9174]                                       |
| ATF3    | activating transcription factor 3 [Source:HGNC Symbol;Acc:HGNC:785]                            |
| TAP2    | transporter 2, ATP-binding cassette, sub-family B (MDR/TAP) [Source:HGNC Symbol;Acc:HGNC:44]   |
| LRIG1   | leucine rich repeats and immunoglobulin like domains 1 [Source:HGNC Symbol;Acc:HGNC:17360]     |
| MPST    | mercaptopyruvate sulfurtransferase [Source:HGNC Symbol;Acc:HGNC:7223]                          |
| PMVK    | phosphomevalonate kinase [Source:HGNC Symbol;Acc:HGNC:9141]                                    |
| SKAP2   | src kinase associated phosphoprotein 2 [Source:HGNC Symbol;Acc:HGNC:15687]                     |
| ADAM9   | ADAM metalloproteinase domain 9 [Source:HGNC Symbol;Acc:HGNC:216]                              |
| ALPI    | alkaline phosphatase, intestinal [Source:HGNC Symbol;Acc:HGNC:437]                             |
| CIT     | citron rho-interacting serine/threonine kinase [Source:HGNC Symbol;Acc:HGNC:1985]              |
| GSPT1   | G1 to S phase transition 1 [Source:HGNC Symbol;Acc:HGNC:4621]                                  |
| CSTA    | cystatin A [Source:HGNC Symbol;Acc:HGNC:2481]                                                  |
| LAPTM5  | lysosomal protein transmembrane 5 [Source:HGNC Symbol;Acc:HGNC:29612]                          |
| UGP2    | UDP-glucose pyrophosphorylase 2 [Source:HGNC Symbol;Acc:HGNC:12527]                            |
| ARHGEF2 | Rho/Rac guanine nucleotide exchange factor 2 [Source:HGNC Symbol;Acc:HGNC:682]                 |
| AUH     | AU RNA binding protein/enoyl-CoA hydratase [Source:HGNC Symbol;Acc:HGNC:890]                   |
| CLEC7A  | C-type lectin domain family 7 member A [Source:HGNC Symbol;Acc:HGNC:14558]                     |
| PLEKHF1 | pleckstrin homology and FYVE domain containing 1 [Source:HGNC Symbol;Acc:HGNC:20764]           |
| PNN     | pinin, desmosome associated protein [Source:HGNC Symbol;Acc:HGNC:9162]                         |
| RHBDF1  | rhomboid 5 homolog 1 [Source:HGNC Symbol;Acc:HGNC:20561]                                       |
| S1PR3   | sphingosine-1-phosphate receptor 3 [Source:HGNC Symbol;Acc:HGNC:3167]                          |



|          |                                                                                                             |
|----------|-------------------------------------------------------------------------------------------------------------|
| TSPAN8   | tetraspanin 8 [Source:HGNC Symbol;Acc:HGNC:11855]                                                           |
| ATP2A3   | ATPase sarcoplasmic/endoplasmic reticulum Ca <sup>2+</sup> transporting 3 [Source:HGNC Symbol;Acc:HGNC:813] |
| GCAT     | glycine C-acetyltransferase [Source:HGNC Symbol;Acc:HGNC:4188]                                              |
| HBA1     | hemoglobin subunit alpha 1 [Source:HGNC Symbol;Acc:HGNC:4823]                                               |
| KMO      | kynurenine 3-monooxygenase [Source:HGNC Symbol;Acc:HGNC:6381]                                               |
| NUDT1    | nudix hydrolase 1 [Source:HGNC Symbol;Acc:HGNC:8048]                                                        |
| NUP210   | nucleoporin 210 [Source:HGNC Symbol;Acc:HGNC:30052]                                                         |
| PAK2     | p21 (RAC1) activated kinase 2 [Source:HGNC Symbol;Acc:HGNC:8591]                                            |
| SH3BGRL  | SH3 domain binding glutamate rich protein like [Source:HGNC Symbol;Acc:HGNC:10823]                          |
| SREBF1   | sterol regulatory element binding transcription factor 1 [Source:HGNC Symbol;Acc:HGNC:11289]                |
| PRICKLE1 | prickle planar cell polarity protein 1 [Source:HGNC Symbol;Acc:HGNC:17019]                                  |
| CYP19A1  | cytochrome P450 family 19 subfamily A member 1 [Source:HGNC Symbol;Acc:HGNC:2594]                           |
| AK2      | adenylate kinase 2 [Source:HGNC Symbol;Acc:HGNC:362]                                                        |
| ATP1B3   | ATPase Na <sup>+</sup> /K <sup>+</sup> transporting subunit beta 3 [Source:HGNC Symbol;Acc:HGNC:806]        |
| PAX3     | paired box 3 [Source:HGNC Symbol;Acc:HGNC:8617]                                                             |
| PBX1     | PBX homeobox 1 [Source:HGNC Symbol;Acc:HGNC:8632]                                                           |
| RAB30    | RAB30, member RAS oncogene family [Source:HGNC Symbol;Acc:HGNC:9770]                                        |
| TNPO1    | transportin 1 [Source:HGNC Symbol;Acc:HGNC:6401]                                                            |
| UBB      | ubiquitin B [Source:HGNC Symbol;Acc:HGNC:12463]                                                             |
| OXTR     | oxytocin receptor [Source:HGNC Symbol;Acc:HGNC:8529]                                                        |
| SRD5A2   | steroid 5 alpha-reductase 2 [Source:HGNC Symbol;Acc:HGNC:11285]                                             |
| SUCLG1   | succinate-CoA ligase alpha subunit [Source:HGNC Symbol;Acc:HGNC:11449]                                      |
| TNFAIP2  | TNF alpha induced protein 2 [Source:HGNC Symbol;Acc:HGNC:11895]                                             |
| TXN2     | thioredoxin 2 [Source:HGNC Symbol;Acc:HGNC:17772]                                                           |
| ADGRG1   | adhesion G protein-coupled receptor G1 [Source:HGNC Symbol;Acc:HGNC:4512]                                   |
| DLC1     | DLC1 Rho GTPase activating protein [Source:HGNC Symbol;Acc:HGNC:2897]                                       |
| ARF1     | ADP ribosylation factor 1 [Source:HGNC Symbol;Acc:HGNC:652]                                                 |
| EFHD1    | EF-hand domain family member D1 [Source:HGNC Symbol;Acc:HGNC:29556]                                         |
| ELAVL1   | ELAV like RNA binding protein 1 [Source:HGNC Symbol;Acc:HGNC:3312]                                          |
| RIOK3    | RIO kinase 3 [Source:HGNC Symbol;Acc:HGNC:11451]                                                            |
| CTNNAL1  | catenin alpha like 1 [Source:HGNC Symbol;Acc:HGNC:2512]                                                     |
| FAM214A  | family with sequence similarity 214 member A [Source:HGNC Symbol;Acc:HGNC:25609]                            |
| RBBP8    | RB binding protein 8, endonuclease [Source:HGNC Symbol;Acc:HGNC:9891]                                       |
| SPDL1    | spindle apparatus coiled-coil protein 1 [Source:HGNC Symbol;Acc:HGNC:26010]                                 |
| CD40LG   | CD40 ligand [Source:HGNC Symbol;Acc:HGNC:11935]                                                             |
| F13A1    | coagulation factor XIII A chain [Source:HGNC Symbol;Acc:HGNC:3531]                                          |
| HDAC3    | histone deacetylase 3 [Source:HGNC Symbol;Acc:HGNC:4854]                                                    |
| JADE1    | jade family PHD finger 1 [Source:HGNC Symbol;Acc:HGNC:30027]                                                |
| ST8SIA4  | ST8 alpha-N-acetyl-neuraminide alpha-2,8-sialyltransferase 4 [Source:HGNC Symbol;Acc:HGNC:10871]            |

|          |                                                                                       |
|----------|---------------------------------------------------------------------------------------|
| LAMA1    | laminin subunit alpha 1 [Source:HGNC Symbol;Acc:HGNC:6481]                            |
| FIGNL1   | fidgetin like 1 [Source:HGNC Symbol;Acc:HGNC:13286]                                   |
| PCSK6    | proprotein convertase subtilisin/kexin type 6 [Source:HGNC Symbol;Acc:HGNC:8569]      |
| ANTXR2   | anthrax toxin receptor 2 [Source:HGNC Symbol;Acc:HGNC:21732]                          |
| CA12     | carbonic anhydrase 12 [Source:HGNC Symbol;Acc:HGNC:1371]                              |
| GSK3A    | glycogen synthase kinase 3 alpha [Source:HGNC Symbol;Acc:HGNC:4616]                   |
| KLF13    | Kruppel like factor 13 [Source:HGNC Symbol;Acc:HGNC:13672]                            |
| MYL1     | myosin light chain 1 [Source:HGNC Symbol;Acc:HGNC:7582]                               |
| OIP5     | Opa interacting protein 5 [Source:HGNC Symbol;Acc:HGNC:20300]                         |
| TCF7     | transcription factor 7 (T-cell specific, HMG-box) [Source:HGNC Symbol;Acc:HGNC:11639] |
| SDC1     | syndecan 1 [Source:HGNC Symbol;Acc:HGNC:10658]                                        |
| FGF7     | fibroblast growth factor 7 [Source:HGNC Symbol;Acc:HGNC:3685]                         |
| BAG2     | BCL2 associated athanogene 2 [Source:HGNC Symbol;Acc:HGNC:938]                        |
| F8       | coagulation factor VIII [Source:HGNC Symbol;Acc:HGNC:3546]                            |
| KRT15    | keratin 15 [Source:HGNC Symbol;Acc:HGNC:6421]                                         |
| MAP4     | microtubule associated protein 4 [Source:HGNC Symbol;Acc:HGNC:6862]                   |
| MARCKSL1 | MARCKS like 1 [Source:HGNC Symbol;Acc:HGNC:7142]                                      |
| SLC16A7  | solute carrier family 16 member 7 [Source:HGNC Symbol;Acc:HGNC:10928]                 |
| SNX10    | sorting nexin 10 [Source:HGNC Symbol;Acc:HGNC:14974]                                  |
| TPM2     | tropomyosin 2 (beta) [Source:HGNC Symbol;Acc:HGNC:12011]                              |
| UTRN     | utrophin [Source:HGNC Symbol;Acc:HGNC:12635]                                          |
| CLDN11   | claudin 11 [Source:HGNC Symbol;Acc:HGNC:8514]                                         |
| CHAF1A   | chromatin assembly factor 1 subunit A [Source:HGNC Symbol;Acc:HGNC:1910]              |
| NCAPG2   | non-SMC condensin II complex subunit G2 [Source:HGNC Symbol;Acc:HGNC:21904]           |
| PPBP     | pro-platelet basic protein [Source:HGNC Symbol;Acc:HGNC:9240]                         |
| UBE2D3   | ubiquitin conjugating enzyme E2 D3 [Source:HGNC Symbol;Acc:HGNC:12476]                |
| CREG1    | cellular repressor of E1A stimulated genes 1 [Source:HGNC Symbol;Acc:HGNC:2351]       |
| HOXA1    | homeobox A1 [Source:HGNC Symbol;Acc:HGNC:5099]                                        |
| WFDC2    | WAP four-disulfide core domain 2 [Source:HGNC Symbol;Acc:HGNC:15939]                  |
| XPO1     | exportin 1 [Source:HGNC Symbol;Acc:HGNC:12825]                                        |
| ACTR3    | ARP3 actin-related protein 3 homolog (yeast) [Source:HGNC Symbol;Acc:HGNC:170]        |
| DTYMK    | deoxythymidylate kinase [Source:HGNC Symbol;Acc:HGNC:3061]                            |
| GPC1     | glypican 1 [Source:HGNC Symbol;Acc:HGNC:4449]                                         |
| LBR      | lamin B receptor [Source:HGNC Symbol;Acc:HGNC:6518]                                   |
| PTPRG    | protein tyrosine phosphatase, receptor type G [Source:HGNC Symbol;Acc:HGNC:9671]      |
| RBM39    | RNA binding motif protein 39 [Source:HGNC Symbol;Acc:HGNC:15923]                      |
| RPA2     | replication protein A2 [Source:HGNC Symbol;Acc:HGNC:10290]                            |
| CD274    | CD274 molecule [Source:HGNC Symbol;Acc:HGNC:17635]                                    |
| CLDN2    | claudin 2 [Source:HGNC Symbol;Acc:HGNC:2041]                                          |
| ACADSB   | acyl-CoA dehydrogenase, short/branched chain [Source:HGNC Symbol;Acc:HGNC:91]         |
| CHGA     | chromogranin A [Source:HGNC Symbol;Acc:HGNC:1929]                                     |

|          |                                                                                           |
|----------|-------------------------------------------------------------------------------------------|
| CLCF1    | cardiotrophin-like cytokine factor 1 [Source:HGNC Symbol;Acc:HGNC:17412]                  |
| G3BP1    | G3BP stress granule assembly factor 1 [Source:HGNC Symbol;Acc:HGNC:30292]                 |
| MARCKS   | myristoylated alanine rich protein kinase C substrate [Source:HGNC Symbol;Acc:HGNC:6759]  |
| PKP2     | plakophilin 2 [Source:HGNC Symbol;Acc:HGNC:9024]                                          |
| TAX1BP3  | Tax1 binding protein 3 [Source:HGNC Symbol;Acc:HGNC:30684]                                |
| ALDH4A1  | aldehyde dehydrogenase 4 family member A1 [Source:HGNC Symbol;Acc:HGNC:406]               |
| PSMB7    | proteasome subunit beta 7 [Source:HGNC Symbol;Acc:HGNC:9544]                              |
| SP7      | Sp7 transcription factor [Source:HGNC Symbol;Acc:HGNC:17321]                              |
| SERPINA3 | serpin family A member 3 [Source:HGNC Symbol;Acc:HGNC:16]                                 |
| BCL2L2   | BCL2 like 2 [Source:HGNC Symbol;Acc:HGNC:995]                                             |
| COL14A1  | collagen type XIV alpha 1 chain [Source:HGNC Symbol;Acc:HGNC:2191]                        |
| DHRS3    | dehydrogenase/reductase 3 [Source:HGNC Symbol;Acc:HGNC:17693]                             |
| EEF2K    | eukaryotic elongation factor 2 kinase [Source:HGNC Symbol;Acc:HGNC:24615]                 |
| SLC25A5  | solute carrier family 25 member 5 [Source:HGNC Symbol;Acc:HGNC:10991]                     |
| PLSCR1   | phospholipid scramblase 1 [Source:HGNC Symbol;Acc:HGNC:9092]                              |
| SLC39A14 | solute carrier family 39 member 14 [Source:HGNC Symbol;Acc:HGNC:20858]                    |
| CLGN     | calmegin [Source:HGNC Symbol;Acc:HGNC:2060]                                               |
| CRELD2   | cysteine rich with EGF like domains 2 [Source:HGNC Symbol;Acc:HGNC:28150]                 |
| DAG1     | dystroglycan 1 [Source:HGNC Symbol;Acc:HGNC:2666]                                         |
| DBN1     | drebrin 1 [Source:HGNC Symbol;Acc:HGNC:2695]                                              |
| PIK3C3   | phosphatidylinositol 3-kinase catalytic subunit type 3 [Source:HGNC Symbol;Acc:HGNC:8974] |
| STARD4   | StAR related lipid transfer domain containing 4 [Source:HGNC Symbol;Acc:HGNC:18058]       |
| SUCLG2   | succinate-CoA ligase GDP-forming beta subunit [Source:HGNC Symbol;Acc:HGNC:11450]         |
| SULF1    | sulfatase 1 [Source:HGNC Symbol;Acc:HGNC:20391]                                           |
| TMSB4X   | thymosin beta 4, X-linked [Source:HGNC Symbol;Acc:HGNC:11881]                             |
| ELF3     | E74 like ETS transcription factor 3 [Source:HGNC Symbol;Acc:HGNC:3318]                    |
| FASN     | fatty acid synthase [Source:HGNC Symbol;Acc:HGNC:3594]                                    |
| EIF4B    | eukaryotic translation initiation factor 4B [Source:HGNC Symbol;Acc:HGNC:3285]            |
| IVD      | isovaleryl-CoA dehydrogenase [Source:HGNC Symbol;Acc:HGNC:6186]                           |
| P4HA1    | prolyl 4-hydroxylase subunit alpha 1 [Source:HGNC Symbol;Acc:HGNC:8546]                   |
| PLN      | phospholamban [Source:HGNC Symbol;Acc:HGNC:9080]                                          |
| SERPINA6 | serpin family A member 6 [Source:HGNC Symbol;Acc:HGNC:1540]                               |
| ANP32E   | acidic nuclear phosphoprotein 32 family member E [Source:HGNC Symbol;Acc:HGNC:16673]      |
| JDP2     | Jun dimerization protein 2 [Source:HGNC Symbol;Acc:HGNC:17546]                            |
| TPT1     | tumor protein, translationally-controlled 1 [Source:HGNC Symbol;Acc:HGNC:12022]           |
| DSP      | desmoplakin [Source:HGNC Symbol;Acc:HGNC:3052]                                            |
| LTF      | lactotransferrin [Source:HGNC Symbol;Acc:HGNC:6720]                                       |
| HSPA1L   | heat shock protein family A (Hsp70) member 1 like [Source:HGNC Symbol;Acc:HGNC:5234]      |
| PNPLA3   | patatin like phospholipase domain containing 3 [Source:HGNC Symbol;Acc:HGNC:18590]        |
| CEP55    | centrosomal protein 55 [Source:HGNC Symbol;Acc:HGNC:1161]                                 |
| GINS1    | GINS complex subunit 1 [Source:HGNC Symbol;Acc:HGNC:28980]                                |

|         |                                                                                                  |
|---------|--------------------------------------------------------------------------------------------------|
| METTL7A | methyltransferase like 7A [Source:HGNC Symbol;Acc:HGNC:24550]                                    |
| PRKAR1A | protein kinase cAMP-dependent type I regulatory subunit alpha [Source:HGNC Symbol;Acc:HGNC:9388] |
| SLC37A4 | solute carrier family 37 member 4 [Source:HGNC Symbol;Acc:HGNC:4061]                             |
| SDPR    | serum deprivation response [Source:HGNC Symbol;Acc:HGNC:10690]                                   |
| EEF1A2  | eukaryotic translation elongation factor 1 alpha 2 [Source:HGNC Symbol;Acc:HGNC:3192]            |
| FANCI   | Fanconi anemia complementation group I [Source:HGNC Symbol;Acc:HGNC:25568]                       |
| MT1H    | metallothionein 1H [Source:HGNC Symbol;Acc:HGNC:7400]                                            |
| NPY1R   | neuropeptide Y receptor Y1 [Source:HGNC Symbol;Acc:HGNC:7956]                                    |
| PDHA1   | pyruvate dehydrogenase (lipoamide) alpha 1 [Source:HGNC Symbol;Acc:HGNC:8806]                    |
| ARRDC3  | arrestin domain containing 3 [Source:HGNC Symbol;Acc:HGNC:29263]                                 |
| HCK     | HCK proto-oncogene, Src family tyrosine kinase [Source:HGNC Symbol;Acc:HGNC:4840]                |
| SDHB    | succinate dehydrogenase complex iron sulfur subunit B [Source:HGNC Symbol;Acc:HGNC:10681]        |
| SLC2A5  | solute carrier family 2 member 5 [Source:HGNC Symbol;Acc:HGNC:11010]                             |
| MVP     | major vault protein [Source:HGNC Symbol;Acc:HGNC:7531]                                           |
| RYR1    | ryanodine receptor 1 [Source:HGNC Symbol;Acc:HGNC:10483]                                         |
| COX5A   | cytochrome c oxidase subunit 5A [Source:HGNC Symbol;Acc:HGNC:2267]                               |
| ENDOG   | endonuclease G [Source:HGNC Symbol;Acc:HGNC:3346]                                                |
| TMSB10  | thymosin beta 10 [Source:HGNC Symbol;Acc:HGNC:11879]                                             |
| RAB31   | RAB31, member RAS oncogene family [Source:HGNC Symbol;Acc:HGNC:9771]                             |
| ABLIM1  | actin binding LIM protein 1 [Source:HGNC Symbol;Acc:HGNC:78]                                     |
| BBOX1   | gamma-butyrobetaine hydroxylase 1 [Source:HGNC Symbol;Acc:HGNC:964]                              |
| CDC45   | cell division cycle associated 5 [Source:HGNC Symbol;Acc:HGNC:14626]                             |
| IFIT3   | interferon induced protein with tetratricopeptide repeats 3 [Source:HGNC Symbol;Acc:HGNC:5411]   |
| MSR1    | macrophage scavenger receptor 1 [Source:HGNC Symbol;Acc:HGNC:7376]                               |
| OLFML3  | olfactomedin like 3 [Source:HGNC Symbol;Acc:HGNC:24956]                                          |
| PAK1    | p21 (RAC1) activated kinase 1 [Source:HGNC Symbol;Acc:HGNC:8590]                                 |
| PSRC1   | proline and serine rich coiled-coil 1 [Source:HGNC Symbol;Acc:HGNC:24472]                        |
| RRBP1   | ribosome binding protein 1 [Source:HGNC Symbol;Acc:HGNC:10448]                                   |
| ETFA    | electron transfer flavoprotein alpha subunit [Source:HGNC Symbol;Acc:HGNC:3481]                  |
| MAPK13  | mitogen-activated protein kinase 13 [Source:HGNC Symbol;Acc:HGNC:6875]                           |
| KRT7    | keratin 7 [Source:HGNC Symbol;Acc:HGNC:6445]                                                     |
| CD38    | CD38 molecule [Source:HGNC Symbol;Acc:HGNC:1667]                                                 |
| DSC2    | desmocollin 2 [Source:HGNC Symbol;Acc:HGNC:3036]                                                 |
| GPD2    | glycerol-3-phosphate dehydrogenase 2 [Source:HGNC Symbol;Acc:HGNC:4456]                          |
| HDAC2   | histone deacetylase 2 [Source:HGNC Symbol;Acc:HGNC:4853]                                         |
| KNSTRN  | kinetochore-localized astrin/SPAG5 binding protein [Source:HGNC Symbol;Acc:HGNC:30767]           |
| PPIF    | peptidylprolyl isomerase F [Source:HGNC Symbol;Acc:HGNC:9259]                                    |
| CAMK4   | calcium/calmodulin dependent protein kinase IV [Source:HGNC Symbol;Acc:HGNC:1464]                |
| FZD2    | frizzled class receptor 2 [Source:HGNC Symbol;Acc:HGNC:4040]                                     |

|          |                                                                                             |
|----------|---------------------------------------------------------------------------------------------|
| IFI30    | IFI30, lysosomal thiol reductase [Source:HGNC Symbol;Acc:HGNC:5398]                         |
| RETN     | resistin [Source:HGNC Symbol;Acc:HGNC:20389]                                                |
| SLC22A4  | solute carrier family 22 member 4 [Source:HGNC Symbol;Acc:HGNC:10968]                       |
| E2F7     | E2F transcription factor 7 [Source:HGNC Symbol;Acc:HGNC:23820]                              |
| BCL2A1   | BCL2 related protein A1 [Source:HGNC Symbol;Acc:HGNC:991]                                   |
| ALDH1A3  | aldehyde dehydrogenase 1 family member A3 [Source:HGNC Symbol;Acc:HGNC:409]                 |
| CD24     | CD24 molecule [Source:HGNC Symbol;Acc:HGNC:1645]                                            |
| IL24     | interleukin 24 [Source:HGNC Symbol;Acc:HGNC:11346]                                          |
| NPC2     | NPC intracellular cholesterol transporter 2 [Source:HGNC Symbol;Acc:HGNC:14537]             |
| PXN      | paxillin [Source:HGNC Symbol;Acc:HGNC:9718]                                                 |
| LTBP1    | latent transforming growth factor beta binding protein 1 [Source:HGNC Symbol;Acc:HGNC:6714] |
| EIF2A    | eukaryotic translation initiation factor 2A [Source:HGNC Symbol;Acc:HGNC:3254]              |
| KIF15    | kinesin family member 15 [Source:HGNC Symbol;Acc:HGNC:17273]                                |
| BACH1    | BTB domain and CNC homolog 1 [Source:HGNC Symbol;Acc:HGNC:935]                              |
| DST      | dystonin [Source:HGNC Symbol;Acc:HGNC:1090]                                                 |
| RASSF1   | Ras association domain family member 1 [Source:HGNC Symbol;Acc:HGNC:9882]                   |
| CACYBP   | calcyclin binding protein [Source:HGNC Symbol;Acc:HGNC:30423]                               |
| TNFRSF25 | tumor necrosis factor receptor superfamily member 25 [Source:HGNC Symbol;Acc:HGNC:11910]    |
| BOK      | BCL2-related ovarian killer [Source:HGNC Symbol;Acc:HGNC:1087]                              |
| CKS1B    | CDC28 protein kinase regulatory subunit 1B [Source:HGNC Symbol;Acc:HGNC:19083]              |
| CYGB     | cytoglobin [Source:HGNC Symbol;Acc:HGNC:16505]                                              |
| MCAM     | melanoma cell adhesion molecule [Source:HGNC Symbol;Acc:HGNC:6934]                          |
| TG       | thyroglobulin [Source:HGNC Symbol;Acc:HGNC:11764]                                           |
| PTH      | parathyroid hormone [Source:HGNC Symbol;Acc:HGNC:9606]                                      |
| GREB1    | growth regulation by estrogen in breast cancer 1 [Source:HGNC Symbol;Acc:HGNC:24885]        |
| ITGA3    | integrin subunit alpha 3 [Source:HGNC Symbol;Acc:HGNC:6139]                                 |
| KL       | klotho [Source:HGNC Symbol;Acc:HGNC:6344]                                                   |
| LMCD1    | LIM and cysteine rich domains 1 [Source:HGNC Symbol;Acc:HGNC:6633]                          |
| MYH10    | myosin, heavy chain 10, non-muscle [Source:HGNC Symbol;Acc:HGNC:7568]                       |
| NCAPG    | non-SMC condensin I complex subunit G [Source:HGNC Symbol;Acc:HGNC:24304]                   |
| CIRBP    | cold inducible RNA binding protein [Source:HGNC Symbol;Acc:HGNC:1982]                       |
| ALDH1L2  | aldehyde dehydrogenase 1 family member L2 [Source:HGNC Symbol;Acc:HGNC:26777]               |
| ARHGDIA  | Rho GDP dissociation inhibitor alpha [Source:HGNC Symbol;Acc:HGNC:678]                      |
| KAT2B    | lysine acetyltransferase 2B [Source:HGNC Symbol;Acc:HGNC:8638]                              |
| CDCA2    | cell division cycle associated 2 [Source:HGNC Symbol;Acc:HGNC:14623]                        |
| FEN1     | flap structure-specific endonuclease 1 [Source:HGNC Symbol;Acc:HGNC:3650]                   |
| GRB2     | growth factor receptor bound protein 2 [Source:HGNC Symbol;Acc:HGNC:4566]                   |
| IFITM3   | interferon induced transmembrane protein 3 [Source:HGNC Symbol;Acc:HGNC:5414]               |
| FAS      | Fas cell surface death receptor [Source:HGNC Symbol;Acc:HGNC:11920]                         |
| TGM1     | transglutaminase 1 [Source:HGNC Symbol;Acc:HGNC:11777]                                      |

|         |                                                                                                                                                    |
|---------|----------------------------------------------------------------------------------------------------------------------------------------------------|
| HYOU1   | hypoxia up-regulated 1 [Source:HGNC Symbol;Acc:HGNC:16931]                                                                                         |
| IRAK2   | interleukin 1 receptor associated kinase 2 [Source:HGNC Symbol;Acc:HGNC:6113]                                                                      |
| NABP1   | nucleic acid binding protein 1 [Source:HGNC Symbol;Acc:HGNC:26232]                                                                                 |
| PDPK1   | 3-phosphoinositide dependent protein kinase 1 [Source:HGNC Symbol;Acc:HGNC:8816]                                                                   |
| ATP7A   | ATPase copper transporting alpha [Source:HGNC Symbol;Acc:HGNC:869]                                                                                 |
| BIK     | BCL2 interacting killer [Source:HGNC Symbol;Acc:HGNC:1051]                                                                                         |
| DDX17   | DEAD-box helicase 17 [Source:HGNC Symbol;Acc:HGNC:2740]                                                                                            |
| GRB10   | growth factor receptor bound protein 10 [Source:HGNC Symbol;Acc:HGNC:4564]                                                                         |
| HADHB   | hydroxyacyl-CoA dehydrogenase/3-ketoacyl-CoA thiolase/enoyl-CoA hydratase (trifunctional protein), beta subunit [Source:HGNC Symbol;Acc:HGNC:4803] |
| PAH     | phenylalanine hydroxylase [Source:HGNC Symbol;Acc:HGNC:8582]                                                                                       |
| UGT2B15 | UDP glucuronosyltransferase family 2 member B15 [Source:HGNC Symbol;Acc:HGNC:12546]                                                                |
| RGCC    | regulator of cell cycle [Source:HGNC Symbol;Acc:HGNC:20369]                                                                                        |
| CALD1   | caldesmon 1 [Source:HGNC Symbol;Acc:HGNC:1441]                                                                                                     |
| PDLIM1  | PDZ and LIM domain 1 [Source:HGNC Symbol;Acc:HGNC:2067]                                                                                            |
| SHMT2   | serine hydroxymethyltransferase 2 [Source:HGNC Symbol;Acc:HGNC:10852]                                                                              |
| ATP7B   | ATPase copper transporting beta [Source:HGNC Symbol;Acc:HGNC:870]                                                                                  |
| DGAT1   | diacylglycerol O-acyltransferase 1 [Source:HGNC Symbol;Acc:HGNC:2843]                                                                              |
| AHRR    | aryl-hydrocarbon receptor repressor [Source:HGNC Symbol;Acc:HGNC:346]                                                                              |
| EIF5A   | eukaryotic translation initiation factor 5A [Source:HGNC Symbol;Acc:HGNC:3300]                                                                     |
| FBXO5   | F-box protein 5 [Source:HGNC Symbol;Acc:HGNC:13584]                                                                                                |
| PAICS   | phosphoribosylaminoimidazole carboxylase;<br>phosphoribosylaminoimidazolesuccinocarboxamide synthase [Source:HGNC Symbol;Acc:HGNC:8587]            |
| PPL     | periplakin [Source:HGNC Symbol;Acc:HGNC:9273]                                                                                                      |
| ROCK1   | Rho associated coiled-coil containing protein kinase 1 [Source:HGNC Symbol;Acc:HGNC:10251]                                                         |
| MB      | myoglobin [Source:HGNC Symbol;Acc:HGNC:6915]                                                                                                       |
| PTCH1   | patched 1 [Source:HGNC Symbol;Acc:HGNC:9585]                                                                                                       |
| CROT    | carnitine O-octanoyltransferase [Source:HGNC Symbol;Acc:HGNC:2366]                                                                                 |
| ITGA6   | integrin subunit alpha 6 [Source:HGNC Symbol;Acc:HGNC:6142]                                                                                        |
| ANKRD1  | ankyrin repeat domain 1 [Source:HGNC Symbol;Acc:HGNC:15819]                                                                                        |
| CLK1    | CDC like kinase 1 [Source:HGNC Symbol;Acc:HGNC:2068]                                                                                               |
| FKBP4   | FK506 binding protein 4 [Source:HGNC Symbol;Acc:HGNC:3720]                                                                                         |
| ACO2    | aconitase 2 [Source:HGNC Symbol;Acc:HGNC:118]                                                                                                      |
| ITGB4   | integrin subunit beta 4 [Source:HGNC Symbol;Acc:HGNC:6158]                                                                                         |
| CPE     | carboxypeptidase E [Source:HGNC Symbol;Acc:HGNC:2303]                                                                                              |
| GTSE1   | G2 and S-phase expressed 1 [Source:HGNC Symbol;Acc:HGNC:13698]                                                                                     |
| HMGA2   | high mobility group AT-hook 2 [Source:HGNC Symbol;Acc:HGNC:5009]                                                                                   |
| PNP     | purine nucleoside phosphorylase [Source:HGNC Symbol;Acc:HGNC:7892]                                                                                 |
| TCF19   | transcription factor 19 [Source:HGNC Symbol;Acc:HGNC:11629]                                                                                        |
| USP18   | ubiquitin specific peptidase 18 [Source:HGNC Symbol;Acc:HGNC:12616]                                                                                |
| MT3     | metallothionein 3 [Source:HGNC Symbol;Acc:HGNC:7408]                                                                                               |

|          |                                                                                                  |
|----------|--------------------------------------------------------------------------------------------------|
| SORL1    | sortilin-related receptor, L(DLR class) A repeats containing [Source:HGNC Symbol;Acc:HGNC:11185] |
| COL6A3   | collagen type VI alpha 3 chain [Source:HGNC Symbol;Acc:HGNC:2213]                                |
| NRIP1    | nuclear receptor interacting protein 1 [Source:HGNC Symbol;Acc:HGNC:8001]                        |
| NUCB2    | nucleobindin 2 [Source:HGNC Symbol;Acc:HGNC:8044]                                                |
| JUP      | junction plakoglobin [Source:HGNC Symbol;Acc:HGNC:6207]                                          |
| NUF2     | NUF2, NDC80 kinetochore complex component [Source:HGNC Symbol;Acc:HGNC:14621]                    |
| PEBP1    | phosphatidylethanolamine binding protein 1 [Source:HGNC Symbol;Acc:HGNC:8630]                    |
| PMP22    | peripheral myelin protein 22 [Source:HGNC Symbol;Acc:HGNC:9118]                                  |
| SLC25A4  | solute carrier family 25 member 4 [Source:HGNC Symbol;Acc:HGNC:10990]                            |
| MX1      | MX dynamin like GTPase 1 [Source:HGNC Symbol;Acc:HGNC:7532]                                      |
| ANLN     | anillin actin binding protein [Source:HGNC Symbol;Acc:HGNC:14082]                                |
| CHAT     | choline O-acetyltransferase [Source:HGNC Symbol;Acc:HGNC:1912]                                   |
| CYP26B1  | cytochrome P450 family 26 subfamily B member 1 [Source:HGNC Symbol;Acc:HGNC:20581]               |
| MEF2C    | myocyte enhancer factor 2C [Source:HGNC Symbol;Acc:HGNC:6996]                                    |
| OGDH     | oxoglutarate dehydrogenase [Source:HGNC Symbol;Acc:HGNC:8124]                                    |
| SFRP1    | secreted frizzled related protein 1 [Source:HGNC Symbol;Acc:HGNC:10776]                          |
| SPC25    | SPC25, NDC80 kinetochore complex component [Source:HGNC Symbol;Acc:HGNC:24031]                   |
| ACADL    | acyl-CoA dehydrogenase, long chain [Source:HGNC Symbol;Acc:HGNC:88]                              |
| RASD1    | ras related dexamethasone induced 1 [Source:HGNC Symbol;Acc:HGNC:15828]                          |
| HELLS    | helicase, lymphoid-specific [Source:HGNC Symbol;Acc:HGNC:4861]                                   |
| HIPK2    | homeodomain interacting protein kinase 2 [Source:HGNC Symbol;Acc:HGNC:14402]                     |
| TNFRSF9  | tumor necrosis factor receptor superfamily member 9 [Source:HGNC Symbol;Acc:HGNC:11924]          |
| BCL3     | B-cell CLL/lymphoma 3 [Source:HGNC Symbol;Acc:HGNC:998]                                          |
| EXO1     | exonuclease 1 [Source:HGNC Symbol;Acc:HGNC:3511]                                                 |
| ALDH6A1  | aldehyde dehydrogenase 6 family member A1 [Source:HGNC Symbol;Acc:HGNC:7179]                     |
| KPNA2    | karyopherin subunit alpha 2 [Source:HGNC Symbol;Acc:HGNC:6395]                                   |
| LHCGR    | luteinizing hormone/choriogonadotropin receptor [Source:HGNC Symbol;Acc:HGNC:6585]               |
| RHOC     | ras homolog family member C [Source:HGNC Symbol;Acc:HGNC:669]                                    |
| SERPINC1 | serpin family C member 1 [Source:HGNC Symbol;Acc:HGNC:775]                                       |
| TNFRSF21 | tumor necrosis factor receptor superfamily member 21 [Source:HGNC Symbol;Acc:HGNC:13469]         |
| COL12A1  | collagen type XII alpha 1 chain [Source:HGNC Symbol;Acc:HGNC:2188]                               |
| ECI1     | enoyl-CoA delta isomerase 1 [Source:HGNC Symbol;Acc:HGNC:2703]                                   |
| IL7R     | interleukin 7 receptor [Source:HGNC Symbol;Acc:HGNC:6024]                                        |
| LBP      | lipopolysaccharide binding protein [Source:HGNC Symbol;Acc:HGNC:6517]                            |
| EMP1     | epithelial membrane protein 1 [Source:HGNC Symbol;Acc:HGNC:3333]                                 |
| GSTA5    | glutathione S-transferase alpha 5 [Source:HGNC Symbol;Acc:HGNC:19662]                            |
| PTK2B    | protein tyrosine kinase 2 beta [Source:HGNC Symbol;Acc:HGNC:9612]                                |
| LCAT     | lecithin-cholesterol acyltransferase [Source:HGNC Symbol;Acc:HGNC:6522]                          |
| MRC1     | mannose receptor, C type 1 [Source:HGNC Symbol;Acc:HGNC:7228]                                    |
| ROCK2    | Rho associated coiled-coil containing protein kinase 2 [Source:HGNC Symbol;Acc:HGNC:10252]       |

|         |                                                                                                                 |
|---------|-----------------------------------------------------------------------------------------------------------------|
| SHC1    | SHC adaptor protein 1 [Source:HGNC Symbol;Acc:HGNC:10840]                                                       |
| CENPA   | centromere protein A [Source:HGNC Symbol;Acc:HGNC:1851]                                                         |
| LIG1    | DNA ligase 1 [Source:HGNC Symbol;Acc:HGNC:6598]                                                                 |
| LITAF   | lipopolysaccharide induced TNF factor [Source:HGNC Symbol;Acc:HGNC:16841]                                       |
| NEK2    | NIMA related kinase 2 [Source:HGNC Symbol;Acc:HGNC:7745]                                                        |
| UBC     | ubiquitin C [Source:HGNC Symbol;Acc:HGNC:12468]                                                                 |
| UGCG    | UDP-glucose ceramide glucosyltransferase [Source:HGNC Symbol;Acc:HGNC:12524]                                    |
| CDCA8   | cell division cycle associated 8 [Source:HGNC Symbol;Acc:HGNC:14629]                                            |
| CENPE   | centromere protein E [Source:HGNC Symbol;Acc:HGNC:1856]                                                         |
| COX4I1  | cytochrome c oxidase subunit 4I1 [Source:HGNC Symbol;Acc:HGNC:2265]                                             |
| HPX     | hemopexin [Source:HGNC Symbol;Acc:HGNC:5171]                                                                    |
| YWHAZ   | tyrosine 3-monooxygenase/tryptophan 5-monooxygenase activation protein zeta [Source:HGNC Symbol;Acc:HGNC:12855] |
| AHCY    | adenosylhomocysteinase [Source:HGNC Symbol;Acc:HGNC:343]                                                        |
| CDCA3   | cell division cycle associated 3 [Source:HGNC Symbol;Acc:HGNC:14624]                                            |
| HSPA4L  | heat shock protein family A (Hsp70) member 4 like [Source:HGNC Symbol;Acc:HGNC:17041]                           |
| RACGAP1 | Rac GTPase activating protein 1 [Source:HGNC Symbol;Acc:HGNC:9804]                                              |
| VASP    | vasodilator-stimulated phosphoprotein [Source:HGNC Symbol;Acc:HGNC:12652]                                       |
| FTL     | ferritin, light polypeptide [Source:HGNC Symbol;Acc:HGNC:3999]                                                  |
| IL1R2   | interleukin 1 receptor type 2 [Source:HGNC Symbol;Acc:HGNC:5994]                                                |
| TFPI    | tissue factor pathway inhibitor [Source:HGNC Symbol;Acc:HGNC:11760]                                             |
| CCNA1   | cyclin A1 [Source:HGNC Symbol;Acc:HGNC:1577]                                                                    |
| KLF2    | Kruppel like factor 2 [Source:HGNC Symbol;Acc:HGNC:6347]                                                        |
| DLGAP5  | DLG associated protein 5 [Source:HGNC Symbol;Acc:HGNC:16864]                                                    |
| EBP     | emopamil binding protein (sterol isomerase) [Source:HGNC Symbol;Acc:HGNC:3133]                                  |
| TPX2    | TPX2, microtubule nucleation factor [Source:HGNC Symbol;Acc:HGNC:1249]                                          |
| DUSP10  | dual specificity phosphatase 10 [Source:HGNC Symbol;Acc:HGNC:3065]                                              |
| GPBR1   | G protein-coupled estrogen receptor 1 [Source:HGNC Symbol;Acc:HGNC:4485]                                        |
| ITGA2   | integrin subunit alpha 2 [Source:HGNC Symbol;Acc:HGNC:6137]                                                     |
| MUC5AC  | mucin 5AC, oligomeric mucus/gel-forming [Source:HGNC Symbol;Acc:HGNC:7515]                                      |
| SPTBN1  | spectrin beta, non-erythrocytic 1 [Source:HGNC Symbol;Acc:HGNC:11275]                                           |
| COL6A1  | collagen type VI alpha 1 [Source:HGNC Symbol;Acc:HGNC:2211]                                                     |
| HSD17B7 | hydroxysteroid 17-beta dehydrogenase 7 [Source:HGNC Symbol;Acc:HGNC:5215]                                       |
| ALDOC   | aldolase, fructose-bisphosphate C [Source:HGNC Symbol;Acc:HGNC:418]                                             |
| CCNF    | cyclin F [Source:HGNC Symbol;Acc:HGNC:1591]                                                                     |
| CXCL3   | C-X-C motif chemokine ligand 3 [Source:HGNC Symbol;Acc:HGNC:4604]                                               |
| HNRNPA1 | heterogeneous nuclear ribonucleoprotein A1 [Source:HGNC Symbol;Acc:HGNC:5031]                                   |
| EZH2    | enhancer of zeste 2 polycomb repressive complex 2 subunit [Source:HGNC Symbol;Acc:HGNC:3527]                    |
| MSH2    | mutS homolog 2 [Source:HGNC Symbol;Acc:HGNC:7325]                                                               |
| PLA2G2A | phospholipase A2 group IIA [Source:HGNC Symbol;Acc:HGNC:9031]                                                   |
| SOX4    | SRY-box 4 [Source:HGNC Symbol;Acc:HGNC:11200]                                                                   |



|        |                                                                        |
|--------|------------------------------------------------------------------------|
| SPTAN1 | spectrin alpha, non-erythrocytic 1 [Source:HGNC Symbol;Acc:HGNC:11273] |
|--------|------------------------------------------------------------------------|

|          |                                                                                                             |
|----------|-------------------------------------------------------------------------------------------------------------|
| NDC80    | NDC80, kinetochore complex component [Source:HGNC Symbol;Acc:HGNC:16909]                                    |
| SLC5A5   | solute carrier family 5 member 5 [Source:HGNC Symbol;Acc:HGNC:11040]                                        |
| IL1RL1   | interleukin 1 receptor like 1 [Source:HGNC Symbol;Acc:HGNC:5998]                                            |
| PGD      | phosphogluconate dehydrogenase [Source:HGNC Symbol;Acc:HGNC:8891]                                           |
| CSRP1    | cysteine and glycine rich protein 1 [Source:HGNC Symbol;Acc:HGNC:2469]                                      |
| GPD1     | glycerol-3-phosphate dehydrogenase 1 [Source:HGNC Symbol;Acc:HGNC:4455]                                     |
| IGF2R    | insulin like growth factor 2 receptor [Source:HGNC Symbol;Acc:HGNC:5467]                                    |
| MAD2L1   | MAD2 mitotic arrest deficient-like 1 (yeast) [Source:HGNC Symbol;Acc:HGNC:6763]                             |
| RGS4     | regulator of G-protein signaling 4 [Source:HGNC Symbol;Acc:HGNC:10000]                                      |
| SULT1E1  | sulfotransferase family 1E member 1 [Source:HGNC Symbol;Acc:HGNC:11377]                                     |
| GSS      | glutathione synthetase [Source:HGNC Symbol;Acc:HGNC:4624]                                                   |
| SRD5A1   | steroid 5 alpha-reductase 1 [Source:HGNC Symbol;Acc:HGNC:11284]                                             |
| IGFBP4   | insulin like growth factor binding protein 4 [Source:HGNC Symbol;Acc:HGNC:5473]                             |
| MAP2K6   | mitogen-activated protein kinase kinase 6 [Source:HGNC Symbol;Acc:HGNC:6846]                                |
| ZEB1     | zinc finger E-box binding homeobox 1 [Source:HGNC Symbol;Acc:HGNC:11642]                                    |
| DGAT2    | diacylglycerol O-acyltransferase 2 [Source:HGNC Symbol;Acc:HGNC:16940]                                      |
| CLDN1    | claudin 1 [Source:HGNC Symbol;Acc:HGNC:2032]                                                                |
| DHCR7    | 7-dehydrocholesterol reductase [Source:HGNC Symbol;Acc:HGNC:2860]                                           |
| HEXB     | hexosaminidase subunit beta [Source:HGNC Symbol;Acc:HGNC:4879]                                              |
| ITGA5    | integrin subunit alpha 5 [Source:HGNC Symbol;Acc:HGNC:6141]                                                 |
| KIF2C    | kinesin family member 2C [Source:HGNC Symbol;Acc:HGNC:6393]                                                 |
| SLC6A6   | solute carrier family 6 member 6 [Source:HGNC Symbol;Acc:HGNC:11052]                                        |
| FBXO32   | F-box protein 32 [Source:HGNC Symbol;Acc:HGNC:16731]                                                        |
| KIF23    | kinesin family member 23 [Source:HGNC Symbol;Acc:HGNC:6392]                                                 |
| SLC27A2  | solute carrier family 27 member 2 [Source:HGNC Symbol;Acc:HGNC:10996]                                       |
| TCF4     | transcription factor 4 [Source:HGNC Symbol;Acc:HGNC:11634]                                                  |
| NFIL3    | nuclear factor, interleukin 3 regulated [Source:HGNC Symbol;Acc:HGNC:7787]                                  |
| CAMK2A   | calcium/calmodulin dependent protein kinase II alpha [Source:HGNC Symbol;Acc:HGNC:1460]                     |
| NRF1     | nuclear respiratory factor 1 [Source:HGNC Symbol;Acc:HGNC:7996]                                             |
| SERPINH1 | serpin family H member 1 [Source:HGNC Symbol;Acc:HGNC:1546]                                                 |
| TKT      | transketolase [Source:HGNC Symbol;Acc:HGNC:11834]                                                           |
| TPM4     | tropomyosin 4 [Source:HGNC Symbol;Acc:HGNC:12013]                                                           |
| PLD1     | phospholipase D1 [Source:HGNC Symbol;Acc:HGNC:9067]                                                         |
| ATP2A2   | ATPase sarcoplasmic/endoplasmic reticulum Ca <sup>2+</sup> transporting 2 [Source:HGNC Symbol;Acc:HGNC:812] |
| FABP3    | fatty acid binding protein 3 [Source:HGNC Symbol;Acc:HGNC:3557]                                             |
| LRP1     | LDL receptor related protein 1 [Source:HGNC Symbol;Acc:HGNC:6692]                                           |
| NGFR     | nerve growth factor receptor [Source:HGNC Symbol;Acc:HGNC:7809]                                             |

|          |                                                                                                      |
|----------|------------------------------------------------------------------------------------------------------|
| RAN      | RAN, member RAS oncogene family [Source:HGNC Symbol;Acc:HGNC:9846]                                   |
| ACP5     | acid phosphatase 5, tartrate resistant [Source:HGNC Symbol;Acc:HGNC:124]                             |
| DES      | desmin [Source:HGNC Symbol;Acc:HGNC:2770]                                                            |
| GSTO1    | glutathione S-transferase omega 1 [Source:HGNC Symbol;Acc:HGNC:13312]                                |
| PIM1     | Pim-1 proto-oncogene, serine/threonine kinase [Source:HGNC Symbol;Acc:HGNC:8986]                     |
| PRKACA   | protein kinase cAMP-activated catalytic subunit alpha [Source:HGNC Symbol;Acc:HGNC:9380]             |
| UPP1     | uridine phosphorylase 1 [Source:HGNC Symbol;Acc:HGNC:12576]                                          |
| EFNA1    | ephrin A1 [Source:HGNC Symbol;Acc:HGNC:3221]                                                         |
| LEF1     | lymphoid enhancer binding factor 1 [Source:HGNC Symbol;Acc:HGNC:6551]                                |
| SERPINB2 | serpin family B member 2 [Source:HGNC Symbol;Acc:HGNC:8584]                                          |
| SKP2     | S-phase kinase-associated protein 2, E3 ubiquitin protein ligase [Source:HGNC Symbol;Acc:HGNC:10901] |
| MT1X     | metallothionein 1X [Source:HGNC Symbol;Acc:HGNC:7405]                                                |
| ACAA2    | acetyl-CoA acyltransferase 2 [Source:HGNC Symbol;Acc:HGNC:83]                                        |
| BRAF     | B-Raf proto-oncogene, serine/threonine kinase [Source:HGNC Symbol;Acc:HGNC:1097]                     |
| KIF11    | kinesin family member 11 [Source:HGNC Symbol;Acc:HGNC:6388]                                          |
| MFN2     | mitofusin 2 [Source:HGNC Symbol;Acc:HGNC:16877]                                                      |
| STIP1    | stress induced phosphoprotein 1 [Source:HGNC Symbol;Acc:HGNC:11387]                                  |
| TIPARP   | TCDD inducible poly(ADP-ribose) polymerase [Source:HGNC Symbol;Acc:HGNC:23696]                       |
| PRNP     | prion protein [Source:HGNC Symbol;Acc:HGNC:9449]                                                     |
| FHL2     | four and a half LIM domains 2 [Source:HGNC Symbol;Acc:HGNC:3703]                                     |
| HAVCR1   | hepatitis A virus cellular receptor 1 [Source:HGNC Symbol;Acc:HGNC:17866]                            |
| NEFH     | neurofilament, heavy polypeptide [Source:HGNC Symbol;Acc:HGNC:7737]                                  |
| PTGER4   | prostaglandin E receptor 4 [Source:HGNC Symbol;Acc:HGNC:9596]                                        |
| EPCAM    | epithelial cell adhesion molecule [Source:HGNC Symbol;Acc:HGNC:11529]                                |
| ASS1     | argininosuccinate synthase 1 [Source:HGNC Symbol;Acc:HGNC:758]                                       |
| CFL1     | cofilin 1 [Source:HGNC Symbol;Acc:HGNC:1874]                                                         |
| COL5A1   | collagen type V alpha 1 [Source:HGNC Symbol;Acc:HGNC:2209]                                           |
| HBB      | hemoglobin subunit beta [Source:HGNC Symbol;Acc:HGNC:4827]                                           |
| KIF20A   | kinesin family member 20A [Source:HGNC Symbol;Acc:HGNC:9787]                                         |
| DRD1     | dopamine receptor D1 [Source:HGNC Symbol;Acc:HGNC:3020]                                              |
| GAP43    | growth associated protein 43 [Source:HGNC Symbol;Acc:HGNC:4140]                                      |
| GATA3    | GATA binding protein 3 [Source:HGNC Symbol;Acc:HGNC:4172]                                            |
| HADH     | hydroxyacyl-CoA dehydrogenase [Source:HGNC Symbol;Acc:HGNC:4799]                                     |
| UGT1A7   | UDP glucuronosyltransferase family 1 member A7 [Source:HGNC Symbol;Acc:HGNC:12539]                   |
| BAG3     | BCL2 associated athanogene 3 [Source:HGNC Symbol;Acc:HGNC:939]                                       |
| CBR1     | carbonyl reductase 1 [Source:HGNC Symbol;Acc:HGNC:1548]                                              |
| NUSAP1   | nucleolar and spindle associated protein 1 [Source:HGNC Symbol;Acc:HGNC:18538]                       |

|          |                                                                                                       |
|----------|-------------------------------------------------------------------------------------------------------|
| ACTA1    | actin, alpha 1, skeletal muscle [Source:HGNC Symbol;Acc:HGNC:129]                                     |
| BUB1B    | BUB1 mitotic checkpoint serine/threonine kinase B [Source:HGNC Symbol;Acc:HGNC:1149]                  |
| CDKN2C   | cyclin dependent kinase inhibitor 2C [Source:HGNC Symbol;Acc:HGNC:1789]                               |
| NFKB2    | nuclear factor kappa B subunit 2 [Source:HGNC Symbol;Acc:HGNC:7795]                                   |
| ERBB3    | erb-b2 receptor tyrosine kinase 3 [Source:HGNC Symbol;Acc:HGNC:3431]                                  |
| ERRFI1   | ERBB receptor feedback inhibitor 1 [Source:HGNC Symbol;Acc:HGNC:18185]                                |
| PBK      | PDZ binding kinase [Source:HGNC Symbol;Acc:HGNC:18282]                                                |
| DNMT3B   | DNA (cytosine-5-)-methyltransferase 3 beta [Source:HGNC Symbol;Acc:HGNC:2979]                         |
| EEF1A1   | eukaryotic translation elongation factor 1 alpha 1 [Source:HGNC Symbol;Acc:HGNC:3189]                 |
| GOT1     | glutamic-oxaloacetic transaminase 1 [Source:HGNC Symbol;Acc:HGNC:4432]                                |
| CTSK     | cathepsin K [Source:HGNC Symbol;Acc:HGNC:2536]                                                        |
| ATF2     | activating transcription factor 2 [Source:HGNC Symbol;Acc:HGNC:784]                                   |
| GHR      | growth hormone receptor [Source:HGNC Symbol;Acc:HGNC:4263]                                            |
| HSPE1    | heat shock protein family E (Hsp10) member 1 [Source:HGNC Symbol;Acc:HGNC:5269]                       |
| ITGB2    | integrin subunit beta 2 [Source:HGNC Symbol;Acc:HGNC:6155]                                            |
| BUB1     | BUB1 mitotic checkpoint serine/threonine kinase [Source:HGNC Symbol;Acc:HGNC:1148]                    |
| HSD17B4  | hydroxysteroid 17-beta dehydrogenase 4 [Source:HGNC Symbol;Acc:HGNC:5213]                             |
| SOCS2    | suppressor of cytokine signaling 2 [Source:HGNC Symbol;Acc:HGNC:19382]                                |
| ATP1A1   | ATPase Na <sup>+</sup> /K <sup>+</sup> transporting subunit alpha 1 [Source:HGNC Symbol;Acc:HGNC:799] |
| HSPB8    | heat shock protein family B (small) member 8 [Source:HGNC Symbol;Acc:HGNC:30171]                      |
| ACHE     | acetylcholinesterase (Cartwright blood group) [Source:HGNC Symbol;Acc:HGNC:108]                       |
| CFLAR    | CASP8 and FADD like apoptosis regulator [Source:HGNC Symbol;Acc:HGNC:1876]                            |
| DNAJA1   | DnaJ heat shock protein family (Hsp40) member A1 [Source:HGNC Symbol;Acc:HGNC:5229]                   |
| GCH1     | GTP cyclohydrolase 1 [Source:HGNC Symbol;Acc:HGNC:4193]                                               |
| SELENBP1 | selenium binding protein 1 [Source:HGNC Symbol;Acc:HGNC:10719]                                        |
| TSHB     | thyroid stimulating hormone beta [Source:HGNC Symbol;Acc:HGNC:12372]                                  |
| CREM     | cAMP responsive element modulator [Source:HGNC Symbol;Acc:HGNC:2352]                                  |
| KLK3     | kallikrein related peptidase 3 [Source:HGNC Symbol;Acc:HGNC:6364]                                     |
| ORM1     | orosomucoid 1 [Source:HGNC Symbol;Acc:HGNC:8498]                                                      |
| PRDX6    | peroxiredoxin 6 [Source:HGNC Symbol;Acc:HGNC:16753]                                                   |
| RGS2     | regulator of G-protein signaling 2 [Source:HGNC Symbol;Acc:HGNC:9998]                                 |
| SOX9     | SRY-box 9 [Source:HGNC Symbol;Acc:HGNC:11204]                                                         |
| PER2     | period circadian clock 2 [Source:HGNC Symbol;Acc:HGNC:8846]                                           |
| AQP3     | aquaporin 3 (Gill blood group) [Source:HGNC Symbol;Acc:HGNC:636]                                      |
| BCL6     | B-cell CLL/lymphoma 6 [Source:HGNC Symbol;Acc:HGNC:1001]                                              |
| ENC1     | ectodermal-neural cortex 1 [Source:HGNC Symbol;Acc:HGNC:3345]                                         |
| LPIN1    | lipin 1 [Source:HGNC Symbol;Acc:HGNC:13345]                                                           |

|         |                                                                                              |
|---------|----------------------------------------------------------------------------------------------|
| MGP     | matrix Gla protein [Source:HGNC Symbol;Acc:HGNC:7060]                                        |
| ADRB1   | adrenoceptor beta 1 [Source:HGNC Symbol;Acc:HGNC:285]                                        |
| CDKN3   | cyclin dependent kinase inhibitor 3 [Source:HGNC Symbol;Acc:HGNC:1791]                       |
| TFF1    | trefoil factor 1 [Source:HGNC Symbol;Acc:HGNC:11755]                                         |
| TPI1    | triosephosphate isomerase 1 [Source:HGNC Symbol;Acc:HGNC:12009]                              |
| CENPF   | centromere protein F [Source:HGNC Symbol;Acc:HGNC:1857]                                      |
| EEF2    | eukaryotic translation elongation factor 2 [Source:HGNC Symbol;Acc:HGNC:3214]                |
| IRS2    | insulin receptor substrate 2 [Source:HGNC Symbol;Acc:HGNC:6126]                              |
| APOA4   | apolipoprotein A4 [Source:HGNC Symbol;Acc:HGNC:602]                                          |
| GGT1    | gamma-glutamyltransferase 1 [Source:HGNC Symbol;Acc:HGNC:4250]                               |
| PGK1    | phosphoglycerate kinase 1 [Source:HGNC Symbol;Acc:HGNC:8896]                                 |
| ENPP2   | ectonucleotide pyrophosphatase/phosphodiesterase 2 [Source:HGNC Symbol;Acc:HGNC:3357]        |
| PDIA3   | protein disulfide isomerase family A member 3 [Source:HGNC Symbol;Acc:HGNC:4606]             |
| ENO2    | enolase 2 [Source:HGNC Symbol;Acc:HGNC:3353]                                                 |
| IDI1    | isopentenyl-diphosphate delta isomerase 1 [Source:HGNC Symbol;Acc:HGNC:5387]                 |
| LEPR    | leptin receptor [Source:HGNC Symbol;Acc:HGNC:6554]                                           |
| MCM5    | minichromosome maintenance complex component 5 [Source:HGNC Symbol;Acc:HGNC:6948]            |
| PTTG1   | pituitary tumor-transforming 1 [Source:HGNC Symbol;Acc:HGNC:9690]                            |
| UBE2C   | ubiquitin conjugating enzyme E2 C [Source:HGNC Symbol;Acc:HGNC:15937]                        |
| SREBF2  | sterol regulatory element binding transcription factor 2 [Source:HGNC Symbol;Acc:HGNC:11290] |
| MYH7    | myosin, heavy chain 7, cardiac muscle, beta [Source:HGNC Symbol;Acc:HGNC:7577]               |
| SLC2A3  | solute carrier family 2 member 3 [Source:HGNC Symbol;Acc:HGNC:11007]                         |
| IFRD1   | interferon related developmental regulator 1 [Source:HGNC Symbol;Acc:HGNC:5456]              |
| SAT1    | spermidine/spermine N1-acetyltransferase 1 [Source:HGNC Symbol;Acc:HGNC:10540]               |
| ACADM   | acyl-CoA dehydrogenase, C-4 to C-12 straight chain [Source:HGNC Symbol;Acc:HGNC:89]          |
| EP300   | E1A binding protein p300 [Source:HGNC Symbol;Acc:HGNC:3373]                                  |
| MCM6    | minichromosome maintenance complex component 6 [Source:HGNC Symbol;Acc:HGNC:6949]            |
| PDK1    | pyruvate dehydrogenase kinase 1 [Source:HGNC Symbol;Acc:HGNC:8809]                           |
| SLC16A1 | solute carrier family 16 member 1 [Source:HGNC Symbol;Acc:HGNC:10922]                        |
| ACSL1   | acyl-CoA synthetase long-chain family member 1 [Source:HGNC Symbol;Acc:HGNC:3569]            |
| PSAT1   | phosphoserine aminotransferase 1 [Source:HGNC Symbol;Acc:HGNC:19129]                         |
| HSPA9   | heat shock protein family A (Hsp70) member 9 [Source:HGNC Symbol;Acc:HGNC:5244]              |
| MAP2K2  | mitogen-activated protein kinase kinase 2 [Source:HGNC Symbol;Acc:HGNC:6842]                 |
| TGFA    | transforming growth factor alpha [Source:HGNC Symbol;Acc:HGNC:11765]                         |

|         |                                                                                                                 |
|---------|-----------------------------------------------------------------------------------------------------------------|
| CYP2E1  | cytochrome P450 family 2 subfamily E member 1 [Source:HGNC Symbol;Acc:HGNC:2631]                                |
| ITPR1   | inositol 1,4,5-trisphosphate receptor type 1 [Source:HGNC Symbol;Acc:HGNC:6180]                                 |
| MCM2    | minichromosome maintenance complex component 2 [Source:HGNC Symbol;Acc:HGNC:6944]                               |
| PDGFRA  | platelet derived growth factor receptor alpha [Source:HGNC Symbol;Acc:HGNC:8803]                                |
| BNIP3   | BCL2/adenovirus E1B 19kDa interacting protein 3 [Source:HGNC Symbol;Acc:HGNC:1084]                              |
| DNAJB9  | DnaJ heat shock protein family (Hsp40) member B9 [Source:HGNC Symbol;Acc:HGNC:6968]                             |
| DNMT3A  | DNA (cytosine-5-)-methyltransferase 3 alpha [Source:HGNC Symbol;Acc:HGNC:2978]                                  |
| CHEK2   | checkpoint kinase 2 [Source:HGNC Symbol;Acc:HGNC:16627]                                                         |
| SLC7A11 | solute carrier family 7 member 11 [Source:HGNC Symbol;Acc:HGNC:11059]                                           |
| TK1     | thymidine kinase 1 [Source:HGNC Symbol;Acc:HGNC:11830]                                                          |
| HK2     | hexokinase 2 [Source:HGNC Symbol;Acc:HGNC:4923]                                                                 |
| INHBA   | inhibin beta A subunit [Source:HGNC Symbol;Acc:HGNC:6066]                                                       |
| ALDOA   | aldolase, fructose-bisphosphate A [Source:HGNC Symbol;Acc:HGNC:414]                                             |
| APEX1   | apurinic/apyrimidinic endodeoxyribonuclease 1 [Source:HGNC Symbol;Acc:HGNC:587]                                 |
| JUND    | JunD proto-oncogene, AP-1 transcription factor subunit [Source:HGNC Symbol;Acc:HGNC:6206]                       |
| MT1A    | metallothionein 1A [Source:HGNC Symbol;Acc:HGNC:7393]                                                           |
| AURKA   | aurora kinase A [Source:HGNC Symbol;Acc:HGNC:11393]                                                             |
| VDR     | vitamin D (1,25- dihydroxyvitamin D3) receptor [Source:HGNC Symbol;Acc:HGNC:12679]                              |
| RARA    | retinoic acid receptor alpha [Source:HGNC Symbol;Acc:HGNC:9864]                                                 |
| SLC22A1 | solute carrier family 22 member 1 [Source:HGNC Symbol;Acc:HGNC:10963]                                           |
| FABP1   | fatty acid binding protein 1 [Source:HGNC Symbol;Acc:HGNC:3555]                                                 |
| SLC2A2  | solute carrier family 2 member 2 [Source:HGNC Symbol;Acc:HGNC:11006]                                            |
| ME1     | malic enzyme 1 [Source:HGNC Symbol;Acc:HGNC:6983]                                                               |
| NR1H4   | nuclear receptor subfamily 1 group H member 4 [Source:HGNC Symbol;Acc:HGNC:7967]                                |
| IL12A   | interleukin 12A [Source:HGNC Symbol;Acc:HGNC:5969]                                                              |
| PRDX2   | peroxiredoxin 2 [Source:HGNC Symbol;Acc:HGNC:9353]                                                              |
| BGLAP   | bone gamma-carboxyglutamate protein [Source:HGNC Symbol;Acc:HGNC:1043]                                          |
| BIRC2   | baculoviral IAP repeat containing 2 [Source:HGNC Symbol;Acc:HGNC:590]                                           |
| INSR    | insulin receptor [Source:HGNC Symbol;Acc:HGNC:6091]                                                             |
| NDRG1   | N-myc downstream regulated 1 [Source:HGNC Symbol;Acc:HGNC:7679]                                                 |
| DUSP6   | dual specificity phosphatase 6 [Source:HGNC Symbol;Acc:HGNC:3072]                                               |
| IFT172  | intraflagellar transport 172 [Source:HGNC Symbol;Acc:HGNC:30391]                                                |
| CCND3   | cyclin D3 [Source:HGNC Symbol;Acc:HGNC:1585]                                                                    |
| HSD3B1  | hydroxy-delta-5-steroid dehydrogenase, 3 beta- and steroid delta-isomerase 1 [Source:HGNC Symbol;Acc:HGNC:5217] |

|           |                                                                                                                                       |
|-----------|---------------------------------------------------------------------------------------------------------------------------------------|
| IDH2      | isocitrate dehydrogenase (NADP(+)) 2, mitochondrial [Source:HGNC Symbol;Acc:HGNC:5383]                                                |
| MSMO1     | methylsterol monooxygenase 1 [Source:HGNC Symbol;Acc:HGNC:10545]                                                                      |
| SQLE      | squalene epoxidase [Source:HGNC Symbol;Acc:HGNC:11279]                                                                                |
| STMN1     | stathmin 1 [Source:HGNC Symbol;Acc:HGNC:6510]                                                                                         |
| BMP2      | bone morphogenetic protein 2 [Source:HGNC Symbol;Acc:HGNC:1069]                                                                       |
| S100A8    | S100 calcium binding protein A8 [Source:HGNC Symbol;Acc:HGNC:10498]                                                                   |
| AKR1C2    | aldo-keto reductase family 1 member C2 [Source:HGNC Symbol;Acc:HGNC:385]                                                              |
| PLIN2     | perilipin 2 [Source:HGNC Symbol;Acc:HGNC:248]                                                                                         |
| HSP90B1   | heat shock protein 90kDa beta family member 1 [Source:HGNC Symbol;Acc:HGNC:12028]                                                     |
| ITGB1     | integrin subunit beta 1 [Source:HGNC Symbol;Acc:HGNC:6153]                                                                            |
| HSP90AB1  | heat shock protein 90kDa alpha family class B member 1 [Source:HGNC Symbol;Acc:HGNC:5258]                                             |
| THRA      | thyroid hormone receptor, alpha [Source:HGNC Symbol;Acc:HGNC:11796]                                                                   |
| HSPA1B    | heat shock protein family A (Hsp70) member 1B [Source:HGNC Symbol;Acc:HGNC:5233]                                                      |
| TNFRSF11B | tumor necrosis factor receptor superfamily member 11b [Source:HGNC Symbol;Acc:HGNC:11909]                                             |
| TNFSF11   | tumor necrosis factor superfamily member 11 [Source:HGNC Symbol;Acc:HGNC:11926]                                                       |
| CCNB2     | cyclin B2 [Source:HGNC Symbol;Acc:HGNC:1580]                                                                                          |
| NCF1      | neutrophil cytosolic factor 1 [Source:HGNC Symbol;Acc:HGNC:7660]                                                                      |
| COL2A1    | collagen type II alpha 1 chain [Source:HGNC Symbol;Acc:HGNC:2200]                                                                     |
| AGAP5     | ArfGAP with GTPase domain, ankyrin repeat and PH domain 5 [Source:HGNC Symbol;Acc:HGNC:23467]                                         |
| B3GAT3    | beta-1,3-glucuronyltransferase 3 [Source:HGNC Symbol;Acc:HGNC:923]                                                                    |
| OR4F16    | olfactory receptor family 4 subfamily F member 16 [Source:HGNC Symbol;Acc:HGNC:15079]                                                 |
| SMARCB1   | SWI/SNF related, matrix associated, actin dependent regulator of chromatin, subfamily b, member 1 [Source:HGNC Symbol;Acc:HGNC:11103] |
| PLRG1     | pleiotropic regulator 1 [Source:HGNC Symbol;Acc:HGNC:9089]                                                                            |
| SLC35F6   | solute carrier family 35 member F6 [Source:HGNC Symbol;Acc:HGNC:26055]                                                                |
| MAFF      | MAF bZIP transcription factor F [Source:HGNC Symbol;Acc:HGNC:6780]                                                                    |
| RPS6      | ribosomal protein S6 [Source:HGNC Symbol;Acc:HGNC:10429]                                                                              |
| TNFAIP3   | TNF alpha induced protein 3 [Source:HGNC Symbol;Acc:HGNC:11896]                                                                       |
| CCND2     | cyclin D2 [Source:HGNC Symbol;Acc:HGNC:1583]                                                                                          |
| FOSL1     | FOS like 1, AP-1 transcription factor subunit [Source:HGNC Symbol;Acc:HGNC:13718]                                                     |
| PCK1      | phosphoenolpyruvate carboxykinase 1 [Source:HGNC Symbol;Acc:HGNC:8724]                                                                |
| HRAS      | Harvey rat sarcoma viral oncogene homolog [Source:HGNC Symbol;Acc:HGNC:5173]                                                          |
| TYMS      | thymidylate synthetase [Source:HGNC Symbol;Acc:HGNC:12441]                                                                            |
| NR4A1     | nuclear receptor subfamily 4 group A member 1 [Source:HGNC Symbol;Acc:HGNC:7980]                                                      |
| CHEK1     | checkpoint kinase 1 [Source:HGNC Symbol;Acc:HGNC:1925]                                                                                |

|           |                                                                                                  |
|-----------|--------------------------------------------------------------------------------------------------|
| CALCA     | calcitonin related polypeptide alpha [Source:HGNC Symbol;Acc:HGNC:1437]                          |
| BAK1      | BCL2 antagonist/killer 1 [Source:HGNC Symbol;Acc:HGNC:949]                                       |
| DRD2      | dopamine receptor D2 [Source:HGNC Symbol;Acc:HGNC:3023]                                          |
| ACOX1     | acyl-CoA oxidase 1 [Source:HGNC Symbol;Acc:HGNC:119]                                             |
| PRDX1     | peroxiredoxin 1 [Source:HGNC Symbol;Acc:HGNC:9352]                                               |
| IRS1      | insulin receptor substrate 1 [Source:HGNC Symbol;Acc:HGNC:6125]                                  |
| PRKCD     | protein kinase C delta [Source:HGNC Symbol;Acc:HGNC:9399]                                        |
| EIF4EBP1  | eukaryotic translation initiation factor 4E binding protein 1 [Source:HGNC Symbol;Acc:HGNC:3288] |
| ODC1      | ornithine decarboxylase 1 [Source:HGNC Symbol;Acc:HGNC:8109]                                     |
| RAF1      | Raf-1 proto-oncogene, serine/threonine kinase [Source:HGNC Symbol;Acc:HGNC:9829]                 |
| PMAIP1    | phorbol-12-myristate-13-acetate-induced protein 1 [Source:HGNC Symbol;Acc:HGNC:9108]             |
| THRB      | thyroid hormone receptor beta [Source:HGNC Symbol;Acc:HGNC:11799]                                |
| COL3A1    | collagen type III alpha 1 chain [Source:HGNC Symbol;Acc:HGNC:2201]                               |
| RUNX2     | runt related transcription factor 2 [Source:HGNC Symbol;Acc:HGNC:10472]                          |
| BAD       | BCL2 associated agonist of cell death [Source:HGNC Symbol;Acc:HGNC:936]                          |
| DCANP1    | dendritic cell-associated nuclear protein [Source:HGNC Symbol;Acc:HGNC:24459]                    |
| AIFM1     | apoptosis inducing factor, mitochondria associated 1 [Source:HGNC Symbol;Acc:HGNC:8768]          |
| CYP2D6    | cytochrome P450 family 2 subfamily D member 6 [Source:HGNC Symbol;Acc:HGNC:2625]                 |
| BIRC3     | baculoviral IAP repeat containing 3 [Source:HGNC Symbol;Acc:HGNC:591]                            |
| TNFRSF10B | tumor necrosis factor receptor superfamily member 10b [Source:HGNC Symbol;Acc:HGNC:11905]        |
| COL1A2    | collagen type I alpha 2 chain [Source:HGNC Symbol;Acc:HGNC:2198]                                 |
| CLC       | Charcot-Leyden crystal galectin [Source:HGNC Symbol;Acc:HGNC:2014]                               |
| JUNB      | JunB proto-oncogene, AP-1 transcription factor subunit [Source:HGNC Symbol;Acc:HGNC:6205]        |
| CEBPA     | CCAAT/enhancer binding protein alpha [Source:HGNC Symbol;Acc:HGNC:1833]                          |
| GSTA3     | glutathione S-transferase alpha 3 [Source:HGNC Symbol;Acc:HGNC:4628]                             |
| HSPD1     | heat shock protein family D (Hsp60) member 1 [Source:HGNC Symbol;Acc:HGNC:5261]                  |
| POR       | cytochrome p450 oxidoreductase [Source:HGNC Symbol;Acc:HGNC:9208]                                |
| ARGFX     | arginine-fifty homeobox [Source:HGNC Symbol;Acc:HGNC:30146]                                      |
| GAGE12B   | G antigen 12B [Source:HGNC Symbol;Acc:HGNC:26779]                                                |
| GAGE12J   | G antigen 12J [Source:HGNC Symbol;Acc:HGNC:17778]                                                |
| GOLGA6L10 | golgin A6 family-like 10 [Source:HGNC Symbol;Acc:HGNC:37228]                                     |
| OR10H3    | olfactory receptor family 10 subfamily H member 3 [Source:HGNC Symbol;Acc:HGNC:8174]             |
| OR1D5     | olfactory receptor family 1 subfamily D member 5 [Source:HGNC Symbol;Acc:HGNC:8186]              |

|               |                                                                                          |
|---------------|------------------------------------------------------------------------------------------|
| OR1L3         | olfactory receptor family 1 subfamily L member 3 [Source:HGNC Symbol;Acc:HGNC:8215]      |
| OR2T34        | olfactory receptor family 2 subfamily T member 34 [Source:HGNC Symbol;Acc:HGNC:31256]    |
| OR4D5         | olfactory receptor family 4 subfamily D member 5 [Source:HGNC Symbol;Acc:HGNC:14852]     |
| OR4F21        | olfactory receptor family 4 subfamily F member 21 [Source:HGNC Symbol;Acc:HGNC:19583]    |
| OR5AN1        | olfactory receptor family 5 subfamily AN member 1 [Source:HGNC Symbol;Acc:HGNC:15255]    |
| OR8B3         | olfactory receptor family 8 subfamily B member 3 [Source:HGNC Symbol;Acc:HGNC:8472]      |
| PRAMEF14      | PRAME family member 14 [Source:HGNC Symbol;Acc:HGNC:13576]                               |
| PRR20A        | proline rich 20A [Source:HGNC Symbol;Acc:HGNC:24754]                                     |
| TNFRSF17      | tumor necrosis factor receptor superfamily member 17 [Source:HGNC Symbol;Acc:HGNC:11913] |
| FSHB          | follicle stimulating hormone beta subunit [Source:HGNC Symbol;Acc:HGNC:3964]             |
| NPPA          | natriuretic peptide A [Source:HGNC Symbol;Acc:HGNC:7939]                                 |
| LDLR          | low density lipoprotein receptor [Source:HGNC Symbol;Acc:HGNC:6547]                      |
| PRL           | prolactin [Source:HGNC Symbol;Acc:HGNC:9445]                                             |
| ELL           | elongation factor for RNA polymerase II [Source:HGNC Symbol;Acc:HGNC:23114]              |
| ENTPD3        | ectonucleoside triphosphate diphosphohydrolase 3 [Source:HGNC Symbol;Acc:HGNC:3365]      |
| SYNJ2BP-COX16 | SYNJ2BP-COX16 readthrough [Source:HGNC Symbol;Acc:HGNC:48350]                            |
| CYP11A1       | cytochrome P450 family 11 subfamily A member 1 [Source:HGNC Symbol;Acc:HGNC:2590]        |
| FABP4         | fatty acid binding protein 4 [Source:HGNC Symbol;Acc:HGNC:3559]                          |
| GDF15         | growth differentiation factor 15 [Source:HGNC Symbol;Acc:HGNC:30142]                     |
| DEFA6         | defensin alpha 6 [Source:HGNC Symbol;Acc:HGNC:2765]                                      |
| UXT           | ubiquitously expressed prefoldin like chaperone [Source:HGNC Symbol;Acc:HGNC:12641]      |
| CDK4          | cyclin dependent kinase 4 [Source:HGNC Symbol;Acc:HGNC:1773]                             |
| XDH           | xanthine dehydrogenase [Source:HGNC Symbol;Acc:HGNC:12805]                               |
| GPX6          | glutathione peroxidase 6 [Source:HGNC Symbol;Acc:HGNC:4558]                              |
| ITK           | IL2 inducible T-cell kinase [Source:HGNC Symbol;Acc:HGNC:6171]                           |
| DUSP1         | dual specificity phosphatase 1 [Source:HGNC Symbol;Acc:HGNC:3064]                        |
| MCL1          | myeloid cell leukemia 1 [Source:HGNC Symbol;Acc:HGNC:6943]                               |
| CDRT4         | CMT1A duplicated region transcript 4 [Source:HGNC Symbol;Acc:HGNC:14383]                 |
| LGALS16       | galectin 16 [Source:HGNC Symbol;Acc:HGNC:40039]                                          |
| OR8J3         | olfactory receptor family 8 subfamily J member 3 [Source:HGNC Symbol;Acc:HGNC:15312]     |
| TMCO5A        | transmembrane and coiled-coil domains 5A [Source:HGNC Symbol;Acc:HGNC:28558]             |
| TPSD1         | tryptase delta 1 [Source:HGNC Symbol;Acc:HGNC:14118]                                     |



|          |                                                                                                                          |
|----------|--------------------------------------------------------------------------------------------------------------------------|
| C11orf40 | chromosome 11 open reading frame 40 [Source:HGNC Symbol;Acc:HGNC:23986]                                                  |
| CT45A2   | cancer/testis antigen family 45, member A2 [Source:HGNC Symbol;Acc:HGNC:28400]                                           |
| CT45A6   | cancer/testis antigen family 45, member A6 [Source:HGNC Symbol;Acc:HGNC:33271]                                           |
| DEFB108B | defensin beta 108B [Source:HGNC Symbol;Acc:HGNC:29966]                                                                   |
| HBS1L    | HBS1 like translational GTPase [Source:HGNC Symbol;Acc:HGNC:4834]                                                        |
| GAGE12G  | G antigen 12G [Source:HGNC Symbol;Acc:HGNC:31907]                                                                        |
| GOLGA6L1 | golgin A6 family-like 1 [Source:HGNC Symbol;Acc:HGNC:37444]                                                              |
| KIR2DL2  | killer cell immunoglobulin like receptor, two Ig domains and long cytoplasmic tail 2 [Source:HGNC Symbol;Acc:HGNC:6330]  |
| NBPF6    | neuroblastoma breakpoint family member 6 [Source:HGNC Symbol;Acc:HGNC:31988]                                             |
| OR6C75   | olfactory receptor family 6 subfamily C member 75 [Source:HGNC Symbol;Acc:HGNC:31304]                                    |
| OR6S1    | olfactory receptor family 6 subfamily S member 1 [Source:HGNC Symbol;Acc:HGNC:15363]                                     |
| RECQL4   | RecQ like helicase 4 [Source:HGNC Symbol;Acc:HGNC:9949]                                                                  |
| SPDYE5   | speedy/RINGO cell cycle regulator family member E5 [Source:HGNC Symbol;Acc:HGNC:35464]                                   |
| ADH4     | alcohol dehydrogenase 4 (class II), pi polypeptide [Source:HGNC Symbol;Acc:HGNC:252]                                     |
| ABCC3    | ATP binding cassette subfamily C member 3 [Source:HGNC Symbol;Acc:HGNC:54]                                               |
| ADH1A    | alcohol dehydrogenase 1A (class I), alpha polypeptide [Source:HGNC Symbol;Acc:HGNC:249]                                  |
| SLAMF7   | SLAM family member 7 [Source:HGNC Symbol;Acc:HGNC:21394]                                                                 |
| TRIM21   | tripartite motif containing 21 [Source:HGNC Symbol;Acc:HGNC:11312]                                                       |
| LHB      | luteinizing hormone beta polypeptide [Source:HGNC Symbol;Acc:HGNC:6584]                                                  |
| SSX3     | SSX family member 3 [Source:HGNC Symbol;Acc:HGNC:11337]                                                                  |
| DEFA3    | defensin alpha 3 [Source:HGNC Symbol;Acc:HGNC:2762]                                                                      |
| MS4A1    | membrane spanning 4-domains A1 [Source:HGNC Symbol;Acc:HGNC:7315]                                                        |
| PRG3     | proteoglycan 3 [Source:HGNC Symbol;Acc:HGNC:9363]                                                                        |
| MAVS     | mitochondrial antiviral signaling protein [Source:HGNC Symbol;Acc:HGNC:29233]                                            |
| SLC9A3R1 | SLC9A3 regulator 1 [Source:HGNC Symbol;Acc:HGNC:11075]                                                                   |
| CD27     | CD27 molecule [Source:HGNC Symbol;Acc:HGNC:11922]                                                                        |
| MCEMP1   | mast cell-expressed membrane protein 1 [Source:HGNC Symbol;Acc:HGNC:27291]                                               |
| TREML2   | triggering receptor expressed on myeloid cells like 2 [Source:HGNC Symbol;Acc:HGNC:21092]                                |
| ABCB4    | ATP binding cassette subfamily B member 4 [Source:HGNC Symbol;Acc:HGNC:45]                                               |
| POMC     | proopiomelanocortin [Source:HGNC Symbol;Acc:HGNC:9201]                                                                   |
| HNRNPM   | heterogeneous nuclear ribonucleoprotein M [Source:HGNC Symbol;Acc:HGNC:5046]                                             |
| KIR2DS2  | killer cell immunoglobulin like receptor, two Ig domains and short cytoplasmic tail 2 [Source:HGNC Symbol;Acc:HGNC:6334] |
| KRTAP2-1 | keratin associated protein 2-1 [Source:HGNC Symbol;Acc:HGNC:16775]                                                       |
| OR2AT4   | olfactory receptor family 2 subfamily AT member 4 [Source:HGNC Symbol;Acc:HGNC:19620]                                    |

|          |                                                                                                        |
|----------|--------------------------------------------------------------------------------------------------------|
| OR2T3    | olfactory receptor family 2 subfamily T member 3 [Source:HGNC Symbol;Acc:HGNC:14727]                   |
| OR2Y1    | olfactory receptor family 2 subfamily Y member 1 [Source:HGNC Symbol;Acc:HGNC:14837]                   |
| OR3A1    | olfactory receptor family 3 subfamily A member 1 [Source:HGNC Symbol;Acc:HGNC:8282]                    |
| OR5B3    | olfactory receptor family 5 subfamily B member 3 [Source:HGNC Symbol;Acc:HGNC:8324]                    |
| OR8B2    | olfactory receptor family 8 subfamily B member 2 [Source:HGNC Symbol;Acc:HGNC:8471]                    |
| PRAMEF1  | PRAME family member 1 [Source:HGNC Symbol;Acc:HGNC:28840]                                              |
| TRIM49   | tripartite motif containing 49 [Source:HGNC Symbol;Acc:HGNC:13431]                                     |
| TSPAN16  | tetraspanin 16 [Source:HGNC Symbol;Acc:HGNC:30725]                                                     |
| ZIM3     | zinc finger imprinted 3 [Source:HGNC Symbol;Acc:HGNC:16366]                                            |
| BID      | BH3 interacting domain death agonist [Source:HGNC Symbol;Acc:HGNC:1050]                                |
| CCNE1    | cyclin E1 [Source:HGNC Symbol;Acc:HGNC:1589]                                                           |
| ALDH3A1  | aldehyde dehydrogenase 3 family member A1 [Source:HGNC Symbol;Acc:HGNC:405]                            |
| IFI44L   | interferon induced protein 44 like [Source:HGNC Symbol;Acc:HGNC:17817]                                 |
| MKI67    | marker of proliferation Ki-67 [Source:HGNC Symbol;Acc:HGNC:7107]                                       |
| STAR     | steroidogenic acute regulatory protein [Source:HGNC Symbol;Acc:HGNC:11359]                             |
| IRF4     | interferon regulatory factor 4 [Source:HGNC Symbol;Acc:HGNC:6119]                                      |
| CCNA2    | cyclin A2 [Source:HGNC Symbol;Acc:HGNC:1578]                                                           |
| CYP17A1  | cytochrome P450 family 17 subfamily A member 1 [Source:HGNC Symbol;Acc:HGNC:2593]                      |
| H2AFX    | H2A histone family member X [Source:HGNC Symbol;Acc:HGNC:4739]                                         |
| TXNRD1   | thioredoxin reductase 1 [Source:HGNC Symbol;Acc:HGNC:12437]                                            |
| CSNK1A1L | casein kinase 1 alpha 1 like [Source:HGNC Symbol;Acc:HGNC:20289]                                       |
| REG1B    | regenerating family member 1 beta [Source:HGNC Symbol;Acc:HGNC:9952]                                   |
| APOL5    | apolipoprotein L5 [Source:HGNC Symbol;Acc:HGNC:14869]                                                  |
| CT45A3   | cancer/testis antigen family 45, member A3 [Source:HGNC Symbol;Acc:HGNC:33268]                         |
| MAP3K1   | mitogen-activated protein kinase kinase kinase 1 [Source:HGNC Symbol;Acc:HGNC:6848]                    |
| MROH9    | maestro heat like repeat family member 9 [Source:HGNC Symbol;Acc:HGNC:26287]                           |
| NBPF4    | neuroblastoma breakpoint family member 4 [Source:HGNC Symbol;Acc:HGNC:26550]                           |
| OR1J1    | olfactory receptor family 1 subfamily J member 1 [Source:HGNC Symbol;Acc:HGNC:8208]                    |
| OR4C46   | olfactory receptor family 4 subfamily C member 46 [Source:HGNC Symbol;Acc:HGNC:31271]                  |
| OR4X1    | olfactory receptor family 4 subfamily X member 1 (gene/pseudogene) [Source:HGNC Symbol;Acc:HGNC:14854] |
| PAGE2    | PAGE family member 2 [Source:HGNC Symbol;Acc:HGNC:31804]                                               |
| PRAMEF5  | PRAME family member 5 [Source:HGNC Symbol;Acc:HGNC:27995]                                              |
| TBC1D3   | TBC1 domain family member 3 [Source:HGNC Symbol;Acc:HGNC:19031]                                        |
| GBP1     | guanylate binding protein 1 [Source:HGNC Symbol;Acc:HGNC:4182]                                         |

|           |                                                                                                                            |
|-----------|----------------------------------------------------------------------------------------------------------------------------|
| GPR34     | G protein-coupled receptor 34 [Source:HGNC Symbol;Acc:HGNC:4490]                                                           |
| LIPA      | lipase A, lysosomal acid type [Source:HGNC Symbol;Acc:HGNC:6617]                                                           |
| RIPK2     | receptor interacting serine/threonine kinase 2 [Source:HGNC Symbol;Acc:HGNC:10020]                                         |
| SPON1     | spondin 1 [Source:HGNC Symbol;Acc:HGNC:11252]                                                                              |
| GKN2      | gastroke 2 [Source:HGNC Symbol;Acc:HGNC:24588]                                                                             |
| FOLR3     | folate receptor 3 (gamma) [Source:HGNC Symbol;Acc:HGNC:3795]                                                               |
| C17orf64  | chromosome 17 open reading frame 64 [Source:HGNC Symbol;Acc:HGNC:26990]                                                    |
| C20orf144 | chromosome 20 open reading frame 144 [Source:HGNC Symbol;Acc:HGNC:16137]                                                   |
| KIR2DS4   | killer cell immunoglobulin like receptor, two Ig domains and short cytoplasmic tail 4 [Source:HGNC Symbol;Acc:HGNC:6336]   |
| KRTAP10-6 | keratin associated protein 10-6 [Source:HGNC Symbol;Acc:HGNC:20523]                                                        |
| MS4A12    | membrane spanning 4-domains A12 [Source:HGNC Symbol;Acc:HGNC:13370]                                                        |
| OR10J1    | olfactory receptor family 10 subfamily J member 1 [Source:HGNC Symbol;Acc:HGNC:8175]                                       |
| OR1L8     | olfactory receptor family 1 subfamily L member 8 [Source:HGNC Symbol;Acc:HGNC:15110]                                       |
| OR4K1     | olfactory receptor family 4 subfamily K member 1 [Source:HGNC Symbol;Acc:HGNC:14726]                                       |
| OR52D1    | olfactory receptor family 52 subfamily D member 1 [Source:HGNC Symbol;Acc:HGNC:15212]                                      |
| TRIM51    | tripartite motif-containing 51 [Source:HGNC Symbol;Acc:HGNC:19023]                                                         |
| TRAF3     | TNF receptor associated factor 3 [Source:HGNC Symbol;Acc:HGNC:12033]                                                       |
| IL10RA    | interleukin 10 receptor subunit alpha [Source:HGNC Symbol;Acc:HGNC:5964]                                                   |
| ANKRD30B  | ankyrin repeat domain 30B [Source:HGNC Symbol;Acc:HGNC:24165]                                                              |
| NFATC2    | nuclear factor of activated T-cells 2 [Source:HGNC Symbol;Acc:HGNC:7776]                                                   |
| ZNF845    | zinc finger protein 845 [Source:HGNC Symbol;Acc:HGNC:25112]                                                                |
| GKN1      | gastroke 1 [Source:HGNC Symbol;Acc:HGNC:23217]                                                                             |
| LAMP5     | lysosomal associated membrane protein family member 5 [Source:HGNC Symbol;Acc:HGNC:16097]                                  |
| CLPS      | colipase [Source:HGNC Symbol;Acc:HGNC:2085]                                                                                |
| KLHDC7B   | kelch domain containing 7B [Source:HGNC Symbol;Acc:HGNC:25145]                                                             |
| PGR       | progesterone receptor [Source:HGNC Symbol;Acc:HGNC:8910]                                                                   |
| ARL14EPL  | ADP ribosylation factor like GTPase 14 effector protein like [Source:HGNC Symbol;Acc:HGNC:44201]                           |
| FRG2C     | FSHD region gene 2 family member C [Source:HGNC Symbol;Acc:HGNC:33626]                                                     |
| KIR3DL3   | killer cell immunoglobulin like receptor, three Ig domains and long cytoplasmic tail 3 [Source:HGNC Symbol;Acc:HGNC:16312] |
| KRTAP5-2  | keratin associated protein 5-2 [Source:HGNC Symbol;Acc:HGNC:23597]                                                         |
| LRRC25    | leucine rich repeat containing 25 [Source:HGNC Symbol;Acc:HGNC:29806]                                                      |
| MUC7      | mucin 7, secreted [Source:HGNC Symbol;Acc:HGNC:7518]                                                                       |
| OR4Q3     | olfactory receptor family 4 subfamily Q member 3 [Source:HGNC Symbol;Acc:HGNC:15426]                                       |
| PRDM1     | PR domain 1 [Source:HGNC Symbol;Acc:HGNC:9346]                                                                             |

|          |                                                                                                 |
|----------|-------------------------------------------------------------------------------------------------|
| CYP1A1   | cytochrome P450 family 1 subfamily A member 1 [Source:HGNC Symbol;Acc:HGNC:2595]                |
| GADD45A  | growth arrest and DNA damage inducible alpha [Source:HGNC Symbol;Acc:HGNC:4095]                 |
| PCNA     | proliferating cell nuclear antigen [Source:HGNC Symbol;Acc:HGNC:8729]                           |
| CDK1     | cyclin dependent kinase 1 [Source:HGNC Symbol;Acc:HGNC:1722]                                    |
| CDKN1B   | cyclin dependent kinase inhibitor 1B [Source:HGNC Symbol;Acc:HGNC:1785]                         |
| ASCL3    | achaete-scute family bHLH transcription factor 3 [Source:HGNC Symbol;Acc:HGNC:740]              |
| C3orf80  | chromosome 3 open reading frame 80 [Source:HGNC Symbol;Acc:HGNC:40048]                          |
| C7orf25  | chromosome 7 open reading frame 25 [Source:HGNC Symbol;Acc:HGNC:21703]                          |
| HSBP1L1  | heat shock factor binding protein 1-like 1 [Source:HGNC Symbol;Acc:HGNC:37243]                  |
| IQCD     | IQ motif containing D [Source:HGNC Symbol;Acc:HGNC:25168]                                       |
| LRRC37A3 | leucine rich repeat containing 37 member A3 [Source:HGNC Symbol;Acc:HGNC:32427]                 |
| TAF7L    | TATA-box binding protein associated factor 7 like [Source:HGNC Symbol;Acc:HGNC:11548]           |
| TGM7     | transglutaminase 7 [Source:HGNC Symbol;Acc:HGNC:30790]                                          |
| ZNF134   | zinc finger protein 134 [Source:HGNC Symbol;Acc:HGNC:12918]                                     |
| ZNF496   | zinc finger protein 496 [Source:HGNC Symbol;Acc:HGNC:23713]                                     |
| ZNF611   | zinc finger protein 611 [Source:HGNC Symbol;Acc:HGNC:28766]                                     |
| ACTA2    | actin, alpha 2, smooth muscle, aorta [Source:HGNC Symbol;Acc:HGNC:130]                          |
| MMP10    | matrix metalloproteinase 10 [Source:HGNC Symbol;Acc:HGNC:7156]                                  |
| PIWIL3   | piwi like RNA-mediated gene silencing 3 [Source:HGNC Symbol;Acc:HGNC:18443]                     |
| PLPP3    | phospholipid phosphatase 3 [Source:HGNC Symbol;Acc:HGNC:9229]                                   |
| SAA1     | serum amyloid A1 [Source:HGNC Symbol;Acc:HGNC:10513]                                            |
| BEX5     | brain expressed X-linked 5 [Source:HGNC Symbol;Acc:HGNC:27990]                                  |
| C5orf51  | chromosome 5 open reading frame 51 [Source:HGNC Symbol;Acc:HGNC:27750]                          |
| CLEC2B   | C-type lectin domain family 2 member B [Source:HGNC Symbol;Acc:HGNC:2053]                       |
| ETV7     | ETS variant 7 [Source:HGNC Symbol;Acc:HGNC:18160]                                               |
| ITLN1    | intelectin 1 [Source:HGNC Symbol;Acc:HGNC:18259]                                                |
| LCK      | LCK proto-oncogene, Src family tyrosine kinase [Source:HGNC Symbol;Acc:HGNC:6524]               |
| PSG3     | pregnancy specific beta-1-glycoprotein 3 [Source:HGNC Symbol;Acc:HGNC:9520]                     |
| SP6      | Sp6 transcription factor [Source:HGNC Symbol;Acc:HGNC:14530]                                    |
| VSIG10L  | V-set and immunoglobulin domain containing 10 like [Source:HGNC Symbol;Acc:HGNC:27111]          |
| CSTL1    | cystatin like 1 [Source:HGNC Symbol;Acc:HGNC:15958]                                             |
| FAM177B  | family with sequence similarity 177 member B [Source:HGNC Symbol;Acc:HGNC:34395]                |
| ALG1     | ALG1, chitobiosyldiphosphodolichol beta-mannosyltransferase [Source:HGNC Symbol;Acc:HGNC:18294] |
| ENOPH1   | enolase-phosphatase 1 [Source:HGNC Symbol;Acc:HGNC:24599]                                       |

|           |                                                                                                                         |
|-----------|-------------------------------------------------------------------------------------------------------------------------|
| NXF5      | nuclear RNA export factor 5 [Source:HGNC Symbol;Acc:HGNC:8075]                                                          |
| OCM2      | oncomodulin 2 [Source:HGNC Symbol;Acc:HGNC:34396]                                                                       |
| SPDYE2    | speedy/RINGO cell cycle regulator family member E2 [Source:HGNC Symbol;Acc:HGNC:33841]                                  |
| USP50     | ubiquitin specific peptidase 50 [Source:HGNC Symbol;Acc:HGNC:20079]                                                     |
| CCSAP     | centriole, cilia and spindle associated protein [Source:HGNC Symbol;Acc:HGNC:29578]                                     |
| NR3C1     | nuclear receptor subfamily 3 group C member 1 [Source:HGNC Symbol;Acc:HGNC:7978]                                        |
| AHSP      | alpha hemoglobin stabilizing protein [Source:HGNC Symbol;Acc:HGNC:18075]                                                |
| CATSPER1  | cation channel sperm associated 1 [Source:HGNC Symbol;Acc:HGNC:17116]                                                   |
| CFAP161   | cilia and flagella associated protein 161 [Source:HGNC Symbol;Acc:HGNC:26782]                                           |
| ZNF416    | zinc finger protein 416 [Source:HGNC Symbol;Acc:HGNC:20645]                                                             |
| ZNF585A   | zinc finger protein 585A [Source:HGNC Symbol;Acc:HGNC:26305]                                                            |
| ZNF649    | zinc finger protein 649 [Source:HGNC Symbol;Acc:HGNC:25741]                                                             |
| CASP7     | caspase 7 [Source:HGNC Symbol;Acc:HGNC:1508]                                                                            |
| SERPINB13 | serpin family B member 13 [Source:HGNC Symbol;Acc:HGNC:8944]                                                            |
| ZNF35     | zinc finger protein 35 [Source:HGNC Symbol;Acc:HGNC:13099]                                                              |
| ZNF548    | zinc finger protein 548 [Source:HGNC Symbol;Acc:HGNC:26561]                                                             |
| ZNF675    | zinc finger protein 675 [Source:HGNC Symbol;Acc:HGNC:30768]                                                             |
| ADGRE3    | adhesion G protein-coupled receptor E3 [Source:HGNC Symbol;Acc:HGNC:23647]                                              |
| CT45A5    | cancer/testis antigen family 45, member A5 [Source:HGNC Symbol;Acc:HGNC:33270]                                          |
| IFNA13    | interferon, alpha 13 [Source:HGNC Symbol;Acc:HGNC:5419]                                                                 |
| KIR2DL3   | killer cell immunoglobulin like receptor, two Ig domains and long cytoplasmic tail 3 [Source:HGNC Symbol;Acc:HGNC:6331] |
| MAGEB18   | MAGE family member B18 [Source:HGNC Symbol;Acc:HGNC:28515]                                                              |
| PLGLB2    | plasminogen-like B2 [Source:HGNC Symbol;Acc:HGNC:9073]                                                                  |
| PRSS38    | protease, serine 38 [Source:HGNC Symbol;Acc:HGNC:29625]                                                                 |
| PYURF     | PIGY upstream reading frame [Source:HGNC Symbol;Acc:HGNC:44317]                                                         |
| RBMXL2    | RNA binding motif protein, X-linked-like 2 [Source:HGNC Symbol;Acc:HGNC:17886]                                          |
| SFTA2     | surfactant associated 2 [Source:HGNC Symbol;Acc:HGNC:18386]                                                             |
| SLFN12L   | schlafen family member 12 like [Source:HGNC Symbol;Acc:HGNC:33920]                                                      |
| SSX2      | SSX family member 2 [Source:HGNC Symbol;Acc:HGNC:11336]                                                                 |
| TBC1D3B   | TBC1 domain family member 3B [Source:HGNC Symbol;Acc:HGNC:27011]                                                        |
| TCEAL6    | transcription elongation factor A like 6 [Source:HGNC Symbol;Acc:HGNC:24553]                                            |
| WFDC13    | WAP four-disulfide core domain 13 [Source:HGNC Symbol;Acc:HGNC:16131]                                                   |
| ZNF90     | zinc finger protein 90 [Source:HGNC Symbol;Acc:HGNC:13165]                                                              |
| ADGRF2    | adhesion G protein-coupled receptor F2 [Source:HGNC Symbol;Acc:HGNC:18991]                                              |
| C11orf91  | chromosome 11 open reading frame 91 [Source:HGNC Symbol;Acc:HGNC:34444]                                                 |
| PHOSPHO1  | phosphoethanolamine/phosphocholine phosphatase [Source:HGNC Symbol;Acc:HGNC:16815]                                      |
| UBE2E1    | ubiquitin conjugating enzyme E2 E1 [Source:HGNC Symbol;Acc:HGNC:12477]                                                  |

|           |                                                                                           |
|-----------|-------------------------------------------------------------------------------------------|
| CDIPT     | CDP-diacylglycerol--inositol 3-phosphatidyltransferase [Source:HGNC Symbol;Acc:HGNC:1769] |
| CKMT1B    | creatine kinase, mitochondrial 1B [Source:HGNC Symbol;Acc:HGNC:1995]                      |
| KLK5      | kallikrein related peptidase 5 [Source:HGNC Symbol;Acc:HGNC:6366]                         |
| PNLIPRP1  | pancreatic lipase related protein 1 [Source:HGNC Symbol;Acc:HGNC:9156]                    |
| ZNF225    | zinc finger protein 225 [Source:HGNC Symbol;Acc:HGNC:13018]                               |
| ZNF415    | zinc finger protein 415 [Source:HGNC Symbol;Acc:HGNC:20636]                               |
| TMPRSS6   | transmembrane protease, serine 6 [Source:HGNC Symbol;Acc:HGNC:16517]                      |
| C1orf131  | chromosome 1 open reading frame 131 [Source:HGNC Symbol;Acc:HGNC:25332]                   |
| CDK15     | cyclin dependent kinase 15 [Source:HGNC Symbol;Acc:HGNC:14434]                            |
| PLD4      | phospholipase D family member 4 [Source:HGNC Symbol;Acc:HGNC:23792]                       |
| TMEM252   | transmembrane protein 252 [Source:HGNC Symbol;Acc:HGNC:28537]                             |
| TMEM92    | transmembrane protein 92 [Source:HGNC Symbol;Acc:HGNC:26579]                              |
| CELA2B    | chymotrypsin like elastase family member 2B [Source:HGNC Symbol;Acc:HGNC:29995]           |
| FBXW5     | F-box and WD repeat domain containing 5 [Source:HGNC Symbol;Acc:HGNC:13613]               |
| FRG2B     | FSHD region gene 2 family member B [Source:HGNC Symbol;Acc:HGNC:33518]                    |
| HNRNPA1L2 | heterogeneous nuclear ribonucleoprotein A1-like 2 [Source:HGNC Symbol;Acc:HGNC:27067]     |
| SSX4      | SSX family member 4 [Source:HGNC Symbol;Acc:HGNC:11338]                                   |
| TBC1D3F   | TBC1 domain family member 3F [Source:HGNC Symbol;Acc:HGNC:18257]                          |
| USP17L2   | ubiquitin specific peptidase 17-like family member 2 [Source:HGNC Symbol;Acc:HGNC:34434]  |
| ZNF286B   | zinc finger protein 286B [Source:HGNC Symbol;Acc:HGNC:33241]                              |
| ESR2      | estrogen receptor 2 [Source:HGNC Symbol;Acc:HGNC:3468]                                    |
| CCNB1     | cyclin B1 [Source:HGNC Symbol;Acc:HGNC:1579]                                              |
| CD200R1L  | CD200 receptor 1 like [Source:HGNC Symbol;Acc:HGNC:24665]                                 |
| GPR142    | G protein-coupled receptor 142 [Source:HGNC Symbol;Acc:HGNC:20088]                        |
| GPR89B    | G protein-coupled receptor 89B [Source:HGNC Symbol;Acc:HGNC:13840]                        |
| IL31RA    | interleukin 31 receptor A [Source:HGNC Symbol;Acc:HGNC:18969]                             |
| KCNRG     | potassium channel regulator [Source:HGNC Symbol;Acc:HGNC:18893]                           |
| ZNF43     | zinc finger protein 43 [Source:HGNC Symbol;Acc:HGNC:13109]                                |
| ZNF714    | zinc finger protein 714 [Source:HGNC Symbol;Acc:HGNC:27124]                               |
| ZNF805    | zinc finger protein 805 [Source:HGNC Symbol;Acc:HGNC:23272]                               |
| NFKB1     | nuclear factor kappa B subunit 1 [Source:HGNC Symbol;Acc:HGNC:7794]                       |
| CD300A    | CD300a molecule [Source:HGNC Symbol;Acc:HGNC:19319]                                       |
| TMEM154   | transmembrane protein 154 [Source:HGNC Symbol;Acc:HGNC:26489]                             |
| ABCC2     | ATP binding cassette subfamily C member 2 [Source:HGNC Symbol;Acc:HGNC:53]                |
| AFP       | alpha fetoprotein [Source:HGNC Symbol;Acc:HGNC:317]                                       |
| GSDMB     | gasdermin B [Source:HGNC Symbol;Acc:HGNC:23690]                                           |
| OSBPL11   | oxysterol binding protein like 11 [Source:HGNC Symbol;Acc:HGNC:16397]                     |
| TTC7A     | tetratricopeptide repeat domain 7A [Source:HGNC Symbol;Acc:HGNC:19750]                    |

|          |                                                                                                       |
|----------|-------------------------------------------------------------------------------------------------------|
| ZNF273   | zinc finger protein 273 [Source:HGNC Symbol;Acc:HGNC:13067]                                           |
| AGAP4    | ArfGAP with GTPase domain, ankyrin repeat and PH domain 4 [Source:HGNC Symbol;Acc:HGNC:23459]         |
| GOLGA6L9 | golgin A6 family-like 9 [Source:HGNC Symbol;Acc:HGNC:37229]                                           |
| GSC2     | goosecoid homeobox 2 [Source:HGNC Symbol;Acc:HGNC:4613]                                               |
| IRF7     | interferon regulatory factor 7 [Source:HGNC Symbol;Acc:HGNC:6122]                                     |
| LY75     | lymphocyte antigen 75 [Source:HGNC Symbol;Acc:HGNC:6729]                                              |
| OR51B4   | olfactory receptor family 51 subfamily B member 4 [Source:HGNC Symbol;Acc:HGNC:14708]                 |
| SPDYE1   | speedy/RINGO cell cycle regulator family member E1 [Source:HGNC Symbol;Acc:HGNC:16408]                |
| ZNF316   | zinc finger protein 316 [Source:HGNC Symbol;Acc:HGNC:13843]                                           |
| ACTRT2   | actin related protein T2 [Source:HGNC Symbol;Acc:HGNC:24026]                                          |
| FAM117B  | family with sequence similarity 117 member B [Source:HGNC Symbol;Acc:HGNC:14440]                      |
| PCDHB5   | protocadherin beta 5 [Source:HGNC Symbol;Acc:HGNC:8690]                                               |
| POLN     | polymerase (DNA) nu [Source:HGNC Symbol;Acc:HGNC:18870]                                               |
| ROPN1L   | rhophilin associated tail protein 1 like [Source:HGNC Symbol;Acc:HGNC:24060]                          |
| SNAPC1   | small nuclear RNA activating complex polypeptide 1 [Source:HGNC Symbol;Acc:HGNC:11134]                |
| TSHZ3    | teashirt zinc finger homeobox 3 [Source:HGNC Symbol;Acc:HGNC:30700]                                   |
| ZNF142   | zinc finger protein 142 [Source:HGNC Symbol;Acc:HGNC:12927]                                           |
| ZNF382   | zinc finger protein 382 [Source:HGNC Symbol;Acc:HGNC:17409]                                           |
| CTNNBIP1 | catenin beta interacting protein 1 [Source:HGNC Symbol;Acc:HGNC:16913]                                |
| OPN3     | opsin 3 [Source:HGNC Symbol;Acc:HGNC:14007]                                                           |
| CASP8AP2 | caspase 8 associated protein 2 [Source:HGNC Symbol;Acc:HGNC:1510]                                     |
| ULBP3    | UL16 binding protein 3 [Source:HGNC Symbol;Acc:HGNC:14895]                                            |
| ACTRT3   | actin related protein T3 [Source:HGNC Symbol;Acc:HGNC:24022]                                          |
| CD58     | CD58 molecule [Source:HGNC Symbol;Acc:HGNC:1688]                                                      |
| NGB      | neuroglobin [Source:HGNC Symbol;Acc:HGNC:14077]                                                       |
| SPR      | sepiapterin reductase (7,8-dihydrobiopterin:NADP+ oxidoreductase) [Source:HGNC Symbol;Acc:HGNC:11257] |
| TIGD7    | tigger transposable element derived 7 [Source:HGNC Symbol;Acc:HGNC:18331]                             |
| TINCR    | tissue differentiation-inducing non-protein coding RNA [Source:HGNC Symbol;Acc:HGNC:14607]            |
| ZNF138   | zinc finger protein 138 [Source:HGNC Symbol;Acc:HGNC:12922]                                           |
| ZNF567   | zinc finger protein 567 [Source:HGNC Symbol;Acc:HGNC:28696]                                           |
| ZNF780A  | zinc finger protein 780A [Source:HGNC Symbol;Acc:HGNC:27603]                                          |
| HELT     | helt bHLH transcription factor [Source:HGNC Symbol;Acc:HGNC:33783]                                    |
| KBTBD13  | kelch repeat and BTB domain containing 13 [Source:HGNC Symbol;Acc:HGNC:37227]                         |
| LRRC37A2 | leucine rich repeat containing 37 member A2 [Source:HGNC Symbol;Acc:HGNC:32404]                       |
| MS4A7    | membrane spanning 4-domains A7 [Source:HGNC Symbol;Acc:HGNC:13378]                                    |

|         |                                                                                              |
|---------|----------------------------------------------------------------------------------------------|
| RGSL1   | regulator of G-protein signaling like 1 [Source:HGNC Symbol;Acc:HGNC:18636]                  |
| EXOC6   | exocyst complex component 6 [Source:HGNC Symbol;Acc:HGNC:23196]                              |
| JAZF1   | JAZF zinc finger 1 [Source:HGNC Symbol;Acc:HGNC:28917]                                       |
| LIG3    | DNA ligase 3 [Source:HGNC Symbol;Acc:HGNC:6600]                                              |
| LRRC46  | leucine rich repeat containing 46 [Source:HGNC Symbol;Acc:HGNC:25047]                        |
| MTMR1   | myotubularin related protein 1 [Source:HGNC Symbol;Acc:HGNC:7449]                            |
| PIP5K1B | phosphatidylinositol-4-phosphate 5-kinase type 1 beta [Source:HGNC Symbol;Acc:HGNC:8995]     |
| PPP1R42 | protein phosphatase 1 regulatory subunit 42 [Source:HGNC Symbol;Acc:HGNC:33732]              |
| RXFP2   | relaxin/insulin like family peptide receptor 2 [Source:HGNC Symbol;Acc:HGNC:17318]           |
| ZNF469  | zinc finger protein 469 [Source:HGNC Symbol;Acc:HGNC:23216]                                  |
| MCOLN1  | mucolipin 1 [Source:HGNC Symbol;Acc:HGNC:13356]                                              |
| NR1I3   | nuclear receptor subfamily 1 group I member 3 [Source:HGNC Symbol;Acc:HGNC:7969]             |
| ANKRD22 | ankyrin repeat domain 22 [Source:HGNC Symbol;Acc:HGNC:28321]                                 |
| NUDT17  | nudix hydrolase 17 [Source:HGNC Symbol;Acc:HGNC:26618]                                       |
| PRTN3   | proteinase 3 [Source:HGNC Symbol;Acc:HGNC:9495]                                              |
| SNX22   | sorting nexin 22 [Source:HGNC Symbol;Acc:HGNC:16315]                                         |
| SYT14   | synaptotagmin 14 [Source:HGNC Symbol;Acc:HGNC:23143]                                         |
| TRMT2B  | tRNA methyltransferase 2 homolog B [Source:HGNC Symbol;Acc:HGNC:25748]                       |
| VGLL1   | vestigial like family member 1 [Source:HGNC Symbol;Acc:HGNC:20985]                           |
| ZNF239  | zinc finger protein 239 [Source:HGNC Symbol;Acc:HGNC:13031]                                  |
| ZNF791  | zinc finger protein 791 [Source:HGNC Symbol;Acc:HGNC:26895]                                  |
| ZNF92   | zinc finger protein 92 [Source:HGNC Symbol;Acc:HGNC:13168]                                   |
| GJA10   | gap junction protein alpha 10 [Source:HGNC Symbol;Acc:HGNC:16995]                            |
| ZNF740  | zinc finger protein 740 [Source:HGNC Symbol;Acc:HGNC:27465]                                  |
| C7orf31 | chromosome 7 open reading frame 31 [Source:HGNC Symbol;Acc:HGNC:21722]                       |
| CDR1    | cerebellar degeneration related protein 1 [Source:HGNC Symbol;Acc:HGNC:1798]                 |
| CLEC3A  | C-type lectin domain family 3 member A [Source:HGNC Symbol;Acc:HGNC:2052]                    |
| MUC12   | mucin 12, cell surface associated [Source:HGNC Symbol;Acc:HGNC:7510]                         |
| MUC3A   | mucin 3A, cell surface associated [Source:HGNC Symbol;Acc:HGNC:7513]                         |
| MZT2A   | mitotic spindle organizing protein 2A [Source:HGNC Symbol;Acc:HGNC:33187]                    |
| NKX2-4  | NK2 homeobox 4 [Source:HGNC Symbol;Acc:HGNC:7837]                                            |
| SPZ1    | spermatogenic leucine zipper 1 [Source:HGNC Symbol;Acc:HGNC:30721]                           |
| TMEM114 | transmembrane protein 114 [Source:HGNC Symbol;Acc:HGNC:33227]                                |
| TPPP3   | tubulin polymerization promoting protein family member 3 [Source:HGNC Symbol;Acc:HGNC:24162] |
| ZNF404  | zinc finger protein 404 [Source:HGNC Symbol;Acc:HGNC:19417]                                  |
| ZNF568  | zinc finger protein 568 [Source:HGNC Symbol;Acc:HGNC:25392]                                  |
| ZNF709  | zinc finger protein 709 [Source:HGNC Symbol;Acc:HGNC:20629]                                  |
| C5orf24 | chromosome 5 open reading frame 24 [Source:HGNC Symbol;Acc:HGNC:26746]                       |
| CENPC   | centromere protein C [Source:HGNC Symbol;Acc:HGNC:1854]                                      |



|          |                                                                                              |
|----------|----------------------------------------------------------------------------------------------|
| PCGF5    | polycomb group ring finger 5 [Source:HGNC Symbol;Acc:HGNC:28264]                             |
| UPK3B    | uroplakin 3B [Source:HGNC Symbol;Acc:HGNC:21444]                                             |
| ZIK1     | zinc finger protein interacting with K protein 1 [Source:HGNC Symbol;Acc:HGNC:33104]         |
| ZNF493   | zinc finger protein 493 [Source:HGNC Symbol;Acc:HGNC:23708]                                  |
| CD109    | CD109 molecule [Source:HGNC Symbol;Acc:HGNC:21685]                                           |
| FAM83B   | family with sequence similarity 83 member B [Source:HGNC Symbol;Acc:HGNC:21357]              |
| GANC     | glucosidase alpha, neutral C [Source:HGNC Symbol;Acc:HGNC:4139]                              |
| MIOX     | myo-inositol oxygenase [Source:HGNC Symbol;Acc:HGNC:14522]                                   |
| MSH4     | mutS homolog 4 [Source:HGNC Symbol;Acc:HGNC:7327]                                            |
| PRRT3    | proline rich transmembrane protein 3 [Source:HGNC Symbol;Acc:HGNC:26591]                     |
| TRAM1L1  | translocation associated membrane protein 1-like 1 [Source:HGNC Symbol;Acc:HGNC:28371]       |
| WDR17    | WD repeat domain 17 [Source:HGNC Symbol;Acc:HGNC:16661]                                      |
| C8orf82  | chromosome 8 open reading frame 82 [Source:HGNC Symbol;Acc:HGNC:33826]                       |
| CALML5   | calmodulin like 5 [Source:HGNC Symbol;Acc:HGNC:18180]                                        |
| EDDM3B   | epididymal protein 3B [Source:HGNC Symbol;Acc:HGNC:19223]                                    |
| FAM209B  | family with sequence similarity 209 member B [Source:HGNC Symbol;Acc:HGNC:16101]             |
| FER1L6   | fer-1 like family member 6 [Source:HGNC Symbol;Acc:HGNC:28065]                               |
| HDAC8    | histone deacetylase 8 [Source:HGNC Symbol;Acc:HGNC:13315]                                    |
| SBK2     | SH3 domain binding kinase family member 2 [Source:HGNC Symbol;Acc:HGNC:34416]                |
| SMR3A    | submaxillary gland androgen regulated protein 3A [Source:HGNC Symbol;Acc:HGNC:19216]         |
| SYCE3    | synaptonemal complex central element protein 3 [Source:HGNC Symbol;Acc:HGNC:35245]           |
| ZNF358   | zinc finger protein 358 [Source:HGNC Symbol;Acc:HGNC:16838]                                  |
| TMSB4Y   | thymosin beta 4, Y-linked [Source:HGNC Symbol;Acc:HGNC:11882]                                |
| UQCR11   | ubiquinol-cytochrome c reductase, complex III subunit XI [Source:HGNC Symbol;Acc:HGNC:30862] |
| ZNF135   | zinc finger protein 135 [Source:HGNC Symbol;Acc:HGNC:12919]                                  |
| ALG11    | ALG11, alpha-1,2-mannosyltransferase [Source:HGNC Symbol;Acc:HGNC:32456]                     |
| ANKRD36B | ankyrin repeat domain 36B [Source:HGNC Symbol;Acc:HGNC:29333]                                |
| BUD13    | BUD13 homolog [Source:HGNC Symbol;Acc:HGNC:28199]                                            |
| GPSM3    | G-protein signaling modulator 3 [Source:HGNC Symbol;Acc:HGNC:13945]                          |
| JADE3    | jade family PHD finger 3 [Source:HGNC Symbol;Acc:HGNC:22982]                                 |
| PLPP1    | phospholipid phosphatase 1 [Source:HGNC Symbol;Acc:HGNC:9228]                                |
| PRDM6    | PR domain 6 [Source:HGNC Symbol;Acc:HGNC:9350]                                               |
| THAP6    | THAP domain containing 6 [Source:HGNC Symbol;Acc:HGNC:23189]                                 |
| TMEM86A  | transmembrane protein 86A [Source:HGNC Symbol;Acc:HGNC:26890]                                |
| TRIM27   | tripartite motif containing 27 [Source:HGNC Symbol;Acc:HGNC:9975]                            |
| FAM47E   | family with sequence similarity 47 member E [Source:HGNC Symbol;Acc:HGNC:34343]              |

|          |                                                                                                     |
|----------|-----------------------------------------------------------------------------------------------------|
| PNLIP    | pancreatic lipase [Source:HGNC Symbol;Acc:HGNC:9155]                                                |
| POLR3E   | polymerase (RNA) III subunit E [Source:HGNC Symbol;Acc:HGNC:30347]                                  |
| ZNF44    | zinc finger protein 44 [Source:HGNC Symbol;Acc:HGNC:13110]                                          |
| ACBD3    | acyl-CoA binding domain containing 3 [Source:HGNC Symbol;Acc:HGNC:15453]                            |
| FCAMR    | Fc fragment of IgA and IgM receptor [Source:HGNC Symbol;Acc:HGNC:24692]                             |
| GAR1     | GAR1 ribonucleoprotein [Source:HGNC Symbol;Acc:HGNC:14264]                                          |
| AJUBA    | ajuba LIM protein [Source:HGNC Symbol;Acc:HGNC:20250]                                               |
| NUP210L  | nucleoporin 210 like [Source:HGNC Symbol;Acc:HGNC:29915]                                            |
| TMEM31   | transmembrane protein 31 [Source:HGNC Symbol;Acc:HGNC:28601]                                        |
| ZNF554   | zinc finger protein 554 [Source:HGNC Symbol;Acc:HGNC:26629]                                         |
| ZNF747   | zinc finger protein 747 [Source:HGNC Symbol;Acc:HGNC:28350]                                         |
| CYTIP    | cytohesin 1 interacting protein [Source:HGNC Symbol;Acc:HGNC:9506]                                  |
| DOCK10   | dedicator of cytokinesis 10 [Source:HGNC Symbol;Acc:HGNC:23479]                                     |
| KCNE3    | potassium voltage-gated channel subfamily E regulatory subunit 3 [Source:HGNC Symbol;Acc:HGNC:6243] |
| PCNX4    | pecanex homolog 4 (Drosophila) [Source:HGNC Symbol;Acc:HGNC:20349]                                  |
| SNPH     | syntaphilin [Source:HGNC Symbol;Acc:HGNC:15931]                                                     |
| SOX15    | SRY-box 15 [Source:HGNC Symbol;Acc:HGNC:11196]                                                      |
| TMEM126B | transmembrane protein 126B [Source:HGNC Symbol;Acc:HGNC:30883]                                      |
| ZNF697   | zinc finger protein 697 [Source:HGNC Symbol;Acc:HGNC:32034]                                         |
| CFAP45   | cilia and flagella associated protein 45 [Source:HGNC Symbol;Acc:HGNC:17229]                        |
| GPN1     | GPN-loop GTPase 1 [Source:HGNC Symbol;Acc:HGNC:17030]                                               |
| ORMDL1   | ORMDL sphingolipid biosynthesis regulator 1 [Source:HGNC Symbol;Acc:HGNC:16036]                     |
| RASL10A  | RAS like family 10 member A [Source:HGNC Symbol;Acc:HGNC:16954]                                     |
| SPTSSB   | serine palmitoyltransferase small subunit B [Source:HGNC Symbol;Acc:HGNC:24045]                     |
| STEAP2   | STEAP2 metalloredutase [Source:HGNC Symbol;Acc:HGNC:17885]                                          |
| ADGRG7   | adhesion G protein-coupled receptor G7 [Source:HGNC Symbol;Acc:HGNC:19241]                          |
| CD70     | CD70 molecule [Source:HGNC Symbol;Acc:HGNC:11937]                                                   |
| GP6      | glycoprotein VI platelet [Source:HGNC Symbol;Acc:HGNC:14388]                                        |
| MAGEB16  | MAGE family member B16 [Source:HGNC Symbol;Acc:HGNC:21188]                                          |
| MRI1     | methylthioribose-1-phosphate isomerase 1 [Source:HGNC Symbol;Acc:HGNC:28469]                        |
| NLGN4X   | neuroligin 4, X-linked [Source:HGNC Symbol;Acc:HGNC:14287]                                          |
| PGLYRP3  | peptidoglycan recognition protein 3 [Source:HGNC Symbol;Acc:HGNC:30014]                             |
| POM121L2 | POM121 transmembrane nucleoporin like 2 [Source:HGNC Symbol;Acc:HGNC:13973]                         |
| SAMD1    | sterile alpha motif domain containing 1 [Source:HGNC Symbol;Acc:HGNC:17958]                         |
| SLC11A1  | solute carrier family 11 member 1 [Source:HGNC Symbol;Acc:HGNC:10907]                               |
| TMEM99   | transmembrane protein 99 [Source:HGNC Symbol;Acc:HGNC:28305]                                        |
| TXNDC2   | thioredoxin domain containing 2 [Source:HGNC Symbol;Acc:HGNC:16470]                                 |
| UROD     | uroporphyrinogen decarboxylase [Source:HGNC Symbol;Acc:HGNC:12591]                                  |
| ZNF816   | zinc finger protein 816 [Source:HGNC Symbol;Acc:HGNC:26995]                                         |
| CRYBB3   | crystallin beta B3 [Source:HGNC Symbol;Acc:HGNC:2400]                                               |

|          |                                                                                                            |
|----------|------------------------------------------------------------------------------------------------------------|
| FAM83A   | family with sequence similarity 83 member A [Source:HGNC Symbol;Acc:HGNC:28210]                            |
| GTPBP10  | GTP binding protein 10 [Source:HGNC Symbol;Acc:HGNC:25106]                                                 |
| RPL37    | ribosomal protein L37 [Source:HGNC Symbol;Acc:HGNC:10347]                                                  |
| SIM1     | single-minded family bHLH transcription factor 1 [Source:HGNC Symbol;Acc:HGNC:10882]                       |
| TCEAL7   | transcription elongation factor A like 7 [Source:HGNC Symbol;Acc:HGNC:28336]                               |
| TMEM167A | transmembrane protein 167A [Source:HGNC Symbol;Acc:HGNC:28330]                                             |
| TMEM45B  | transmembrane protein 45B [Source:HGNC Symbol;Acc:HGNC:25194]                                              |
| UNK      | unkempt family zinc finger [Source:HGNC Symbol;Acc:HGNC:29369]                                             |
| ZFP14    | ZFP14 zinc finger protein [Source:HGNC Symbol;Acc:HGNC:29312]                                              |
| ARMCX4   | armadillo repeat containing, X-linked 4 [Source:HGNC Symbol;Acc:HGNC:28615]                                |
| ASB16    | ankyrin repeat and SOCS box containing 16 [Source:HGNC Symbol;Acc:HGNC:19768]                              |
| CDS1     | CDP-diacylglycerol synthase 1 [Source:HGNC Symbol;Acc:HGNC:1800]                                           |
| DNAJC17  | DnaJ heat shock protein family (Hsp40) member C17 [Source:HGNC Symbol;Acc:HGNC:25556]                      |
| LYPLA1   | lysophospholipase I [Source:HGNC Symbol;Acc:HGNC:6737]                                                     |
| SLC6A1   | solute carrier family 6 member 1 [Source:HGNC Symbol;Acc:HGNC:11042]                                       |
| SYT15    | synaptotagmin 15 [Source:HGNC Symbol;Acc:HGNC:17167]                                                       |
| TAF1B    | TATA-box binding protein associated factor, RNA polymerase I subunit B [Source:HGNC Symbol;Acc:HGNC:11533] |
| C15orf65 | chromosome 15 open reading frame 65 [Source:HGNC Symbol;Acc:HGNC:44654]                                    |
| C1orf216 | chromosome 1 open reading frame 216 [Source:HGNC Symbol;Acc:HGNC:26800]                                    |
| CCL15    | C-C motif chemokine ligand 15 [Source:HGNC Symbol;Acc:HGNC:10613]                                          |
| KPNA7    | karyopherin subunit alpha 7 [Source:HGNC Symbol;Acc:HGNC:21839]                                            |
| NLRP7    | NLR family pyrin domain containing 7 [Source:HGNC Symbol;Acc:HGNC:22947]                                   |
| NMT2     | N-myristoyltransferase 2 [Source:HGNC Symbol;Acc:HGNC:7858]                                                |
| OR8B8    | olfactory receptor family 8 subfamily B member 8 [Source:HGNC Symbol;Acc:HGNC:8477]                        |
| RSPH10B  | radial spoke head 10 homolog B [Source:HGNC Symbol;Acc:HGNC:27362]                                         |
| ZNF282   | zinc finger protein 282 [Source:HGNC Symbol;Acc:HGNC:13076]                                                |
| ATP8A2   | ATPase phospholipid transporting 8A2 [Source:HGNC Symbol;Acc:HGNC:13533]                                   |
| CD163L1  | CD163 molecule like 1 [Source:HGNC Symbol;Acc:HGNC:30375]                                                  |
| DDX47    | DEAD-box helicase 47 [Source:HGNC Symbol;Acc:HGNC:18682]                                                   |
| DENND1C  | DENN domain containing 1C [Source:HGNC Symbol;Acc:HGNC:26225]                                              |
| HOXB4    | homeobox B4 [Source:HGNC Symbol;Acc:HGNC:5115]                                                             |
| MCTP1    | multiple C2 and transmembrane domain containing 1 [Source:HGNC Symbol;Acc:HGNC:26183]                      |
| MUC20    | mucin 20, cell surface associated [Source:HGNC Symbol;Acc:HGNC:23282]                                      |
| PLAA     | phospholipase A2 activating protein [Source:HGNC Symbol;Acc:HGNC:9043]                                     |
| RBP7     | retinol binding protein 7 [Source:HGNC Symbol;Acc:HGNC:30316]                                              |
| SMIM3    | small integral membrane protein 3 [Source:HGNC Symbol;Acc:HGNC:30248]                                      |
| TMEM161B | transmembrane protein 161B [Source:HGNC Symbol;Acc:HGNC:28483]                                             |

|           |                                                                                              |
|-----------|----------------------------------------------------------------------------------------------|
| APLF      | aprataxin and PNKP like factor [Source:HGNC Symbol;Acc:HGNC:28724]                           |
| APOH      | apolipoprotein H [Source:HGNC Symbol;Acc:HGNC:616]                                           |
| KLC3      | kinesin light chain 3 [Source:HGNC Symbol;Acc:HGNC:20717]                                    |
| QSOX2     | quiescin sulfhydryl oxidase 2 [Source:HGNC Symbol;Acc:HGNC:30249]                            |
| RNF139    | ring finger protein 139 [Source:HGNC Symbol;Acc:HGNC:17023]                                  |
| TTC38     | tetratricopeptide repeat domain 38 [Source:HGNC Symbol;Acc:HGNC:26082]                       |
| U2AF1L4   | U2 small nuclear RNA auxiliary factor 1-like 4 [Source:HGNC Symbol;Acc:HGNC:23020]           |
| ZFYVE9    | zinc finger FYVE-type containing 9 [Source:HGNC Symbol;Acc:HGNC:6775]                        |
| ZNF430    | zinc finger protein 430 [Source:HGNC Symbol;Acc:HGNC:20808]                                  |
| ZNF624    | zinc finger protein 624 [Source:HGNC Symbol;Acc:HGNC:29254]                                  |
| LCN1      | lipocalin 1 [Source:HGNC Symbol;Acc:HGNC:6525]                                               |
| TSSK6     | testis specific serine kinase 6 [Source:HGNC Symbol;Acc:HGNC:30410]                          |
| ADIG      | adipogenin [Source:HGNC Symbol;Acc:HGNC:28606]                                               |
| GZMH      | granzyme H [Source:HGNC Symbol;Acc:HGNC:4710]                                                |
| ACSF2     | acyl-CoA synthetase family member 2 [Source:HGNC Symbol;Acc:HGNC:26101]                      |
| HOXA3     | homeobox A3 [Source:HGNC Symbol;Acc:HGNC:5104]                                               |
| NIPSNAP3A | nipsnap homolog 3A [Source:HGNC Symbol;Acc:HGNC:23619]                                       |
| RBM48     | RNA binding motif protein 48 [Source:HGNC Symbol;Acc:HGNC:21785]                             |
| SAMD12    | sterile alpha motif domain containing 12 [Source:HGNC Symbol;Acc:HGNC:31750]                 |
| SCO1      | SCO1 cytochrome c oxidase assembly protein [Source:HGNC Symbol;Acc:HGNC:10603]               |
| TRO       | trophinin [Source:HGNC Symbol;Acc:HGNC:12326]                                                |
| ZNF146    | zinc finger protein 146 [Source:HGNC Symbol;Acc:HGNC:12931]                                  |
| ANGPTL7   | angiopoietin like 7 [Source:HGNC Symbol;Acc:HGNC:24078]                                      |
| CRISPLD1  | cysteine rich secretory protein LCCL domain containing 1 [Source:HGNC Symbol;Acc:HGNC:18206] |
| DLK2      | delta like non-canonical Notch ligand 2 [Source:HGNC Symbol;Acc:HGNC:21113]                  |
| IGHMBP2   | immunoglobulin mu binding protein 2 [Source:HGNC Symbol;Acc:HGNC:5542]                       |
| LYPD6B    | LY6/PLAUR domain containing 6B [Source:HGNC Symbol;Acc:HGNC:27018]                           |
| MTMR9     | myotubularin related protein 9 [Source:HGNC Symbol;Acc:HGNC:14596]                           |
| OVOL2     | ovo like zinc finger 2 [Source:HGNC Symbol;Acc:HGNC:15804]                                   |
| STEAP3    | STEAP3 metalloredutase [Source:HGNC Symbol;Acc:HGNC:24592]                                   |
| ZNF24     | zinc finger protein 24 [Source:HGNC Symbol;Acc:HGNC:13032]                                   |
| ANKIB1    | ankyrin repeat and IBR domain containing 1 [Source:HGNC Symbol;Acc:HGNC:22215]               |
| ASPHD1    | aspartate beta-hydroxylase domain containing 1 [Source:HGNC Symbol;Acc:HGNC:27380]           |
| CCPG1     | cell cycle progression 1 [Source:HGNC Symbol;Acc:HGNC:24227]                                 |
| DSG3      | desmoglein 3 [Source:HGNC Symbol;Acc:HGNC:3050]                                              |
| GPR119    | G protein-coupled receptor 119 [Source:HGNC Symbol;Acc:HGNC:19060]                           |
| GPR135    | G protein-coupled receptor 135 [Source:HGNC Symbol;Acc:HGNC:19991]                           |
| GPR21     | G protein-coupled receptor 21 [Source:HGNC Symbol;Acc:HGNC:4476]                             |
| GRHL2     | grainyhead like transcription factor 2 [Source:HGNC Symbol;Acc:HGNC:2799]                    |

|          |                                                                                                                 |
|----------|-----------------------------------------------------------------------------------------------------------------|
| HRNR     | hornerin [Source:HGNC Symbol;Acc:HGNC:20846]                                                                    |
| KCNMB1   | potassium calcium-activated channel subfamily M regulatory beta subunit 1<br>[Source:HGNC Symbol;Acc:HGNC:6285] |
| KRT6C    | keratin 6C [Source:HGNC Symbol;Acc:HGNC:20406]                                                                  |
| NAP1L3   | nucleosome assembly protein 1 like 3 [Source:HGNC Symbol;Acc:HGNC:7639]                                         |
| OSTN     | osteocrin [Source:HGNC Symbol;Acc:HGNC:29961]                                                                   |
| OVGP1    | oviductal glycoprotein 1 [Source:HGNC Symbol;Acc:HGNC:8524]                                                     |
| TRAF3IP3 | TRAF3 interacting protein 3 [Source:HGNC Symbol;Acc:HGNC:30766]                                                 |
| XKR9     | XK related 9 [Source:HGNC Symbol;Acc:HGNC:20937]                                                                |
| ZXDA     | zinc finger, X-linked, duplicated A [Source:HGNC Symbol;Acc:HGNC:13198]                                         |
| COMMD6   | COMM domain containing 6 [Source:HGNC Symbol;Acc:HGNC:24015]                                                    |
| ELMO3    | engulfment and cell motility 3 [Source:HGNC Symbol;Acc:HGNC:17289]                                              |
| HRH4     | histamine receptor H4 [Source:HGNC Symbol;Acc:HGNC:17383]                                                       |
| PITHD1   | PITH domain containing 1 [Source:HGNC Symbol;Acc:HGNC:25022]                                                    |
| SYDE2    | synapse defective Rho GTPase homolog 2 [Source:HGNC Symbol;Acc:HGNC:25841]                                      |
| TBX5     | T-box 5 [Source:HGNC Symbol;Acc:HGNC:11604]                                                                     |
| C21orf33 | chromosome 21 open reading frame 33 [Source:HGNC Symbol;Acc:HGNC:1273]                                          |
| FSD1     | fibronectin type III and SPRY domain containing 1 [Source:HGNC<br>Symbol;Acc:HGNC:13745]                        |
| AKAP13   | A-kinase anchoring protein 13 [Source:HGNC Symbol;Acc:HGNC:371]                                                 |
| CA8      | carbonic anhydrase 8 [Source:HGNC Symbol;Acc:HGNC:1382]                                                         |
| CMTM4    | CKLF like MARVEL transmembrane domain containing 4 [Source:HGNC<br>Symbol;Acc:HGNC:19175]                       |
| CNIH1    | cornichon family AMPA receptor auxiliary protein 1 [Source:HGNC<br>Symbol;Acc:HGNC:19431]                       |
| KANSL1L  | KAT8 regulatory NSL complex subunit 1 like [Source:HGNC Symbol;Acc:HGNC:26310]                                  |
| KRT24    | keratin 24 [Source:HGNC Symbol;Acc:HGNC:18527]                                                                  |
| MORN2    | MORN repeat containing 2 [Source:HGNC Symbol;Acc:HGNC:30166]                                                    |
| NPSR1    | neuropeptide S receptor 1 [Source:HGNC Symbol;Acc:HGNC:23631]                                                   |
| OVOS2    |                                                                                                                 |
| PPIAL4A  | peptidylprolyl isomerase A like 4A [Source:HGNC Symbol;Acc:HGNC:24369]                                          |
| PROP1    | PROP paired-like homeobox 1 [Source:HGNC Symbol;Acc:HGNC:9455]                                                  |
| RBM7     | RNA binding motif protein 7 [Source:HGNC Symbol;Acc:HGNC:9904]                                                  |
| SPAG6    | sperm associated antigen 6 [Source:HGNC Symbol;Acc:HGNC:11215]                                                  |
| SYTL1    | synaptotagmin like 1 [Source:HGNC Symbol;Acc:HGNC:15584]                                                        |
| TAPBPL   | TAP binding protein like [Source:HGNC Symbol;Acc:HGNC:30683]                                                    |
| TMEM156  | transmembrane protein 156 [Source:HGNC Symbol;Acc:HGNC:26260]                                                   |
| TMEM87A  | transmembrane protein 87A [Source:HGNC Symbol;Acc:HGNC:24522]                                                   |
| TMIGD1   | transmembrane and immunoglobulin domain containing 1 [Source:HGNC<br>Symbol;Acc:HGNC:32431]                     |
| UPK2     | uroplakin 2 [Source:HGNC Symbol;Acc:HGNC:12579]                                                                 |
| GAS7     | growth arrest specific 7 [Source:HGNC Symbol;Acc:HGNC:4169]                                                     |

|          |                                                                                                   |
|----------|---------------------------------------------------------------------------------------------------|
| KDM3A    | lysine demethylase 3A [Source:HGNC Symbol;Acc:HGNC:20815]                                         |
| LETM2    | leucine zipper and EF-hand containing transmembrane protein 2 [Source:HGNC Symbol;Acc:HGNC:14648] |
| MMP28    | matrix metalloproteinase 28 [Source:HGNC Symbol;Acc:HGNC:14366]                                   |
| PCTP     | phosphatidylcholine transfer protein [Source:HGNC Symbol;Acc:HGNC:8752]                           |
| PLEKHA7  | pleckstrin homology domain containing A7 [Source:HGNC Symbol;Acc:HGNC:27049]                      |
| ADGB     | androglobin [Source:HGNC Symbol;Acc:HGNC:21212]                                                   |
| AK6      | adenylate kinase 6 [Source:HGNC Symbol;Acc:HGNC:49151]                                            |
| C1QL2    | complement component 1, q subcomponent-like 2 [Source:HGNC Symbol;Acc:HGNC:24181]                 |
| CCP110   | centriolar coiled-coil protein 110 [Source:HGNC Symbol;Acc:HGNC:24342]                            |
| UBE2U    | ubiquitin conjugating enzyme E2 U (putative) [Source:HGNC Symbol;Acc:HGNC:28559]                  |
| ABCC11   | ATP binding cassette subfamily C member 11 [Source:HGNC Symbol;Acc:HGNC:14639]                    |
| ADAMTS3  | ADAM metalloproteinase with thrombospondin type 1 motif 3 [Source:HGNC Symbol;Acc:HGNC:219]       |
| AZI2     | 5-azacytidine induced 2 [Source:HGNC Symbol;Acc:HGNC:24002]                                       |
| C11orf80 | chromosome 11 open reading frame 80 [Source:HGNC Symbol;Acc:HGNC:26197]                           |
| CCDC170  | coiled-coil domain containing 170 [Source:HGNC Symbol;Acc:HGNC:21177]                             |
| DCD      | dermcidin [Source:HGNC Symbol;Acc:HGNC:14669]                                                     |
| FGD3     | FYVE, RhoGEF and PH domain containing 3 [Source:HGNC Symbol;Acc:HGNC:16027]                       |
| GPR26    | G protein-coupled receptor 26 [Source:HGNC Symbol;Acc:HGNC:4481]                                  |
| OCM      | oncomodulin [Source:HGNC Symbol;Acc:HGNC:8105]                                                    |
| PALM     | paralemmin [Source:HGNC Symbol;Acc:HGNC:8594]                                                     |
| RBAK     | RB associated KRAB zinc finger [Source:HGNC Symbol;Acc:HGNC:17680]                                |
| RGS1     | regulator of G-protein signaling 1 [Source:HGNC Symbol;Acc:HGNC:9991]                             |
| SEC14L4  | SEC14 like lipid binding 4 [Source:HGNC Symbol;Acc:HGNC:20627]                                    |
| SYT3     | synaptotagmin 3 [Source:HGNC Symbol;Acc:HGNC:11511]                                               |
| TCF24    | transcription factor 24 [Source:HGNC Symbol;Acc:HGNC:32275]                                       |
| TIGD5    | tigger transposable element derived 5 [Source:HGNC Symbol;Acc:HGNC:18336]                         |
| ZFYVE28  | zinc finger FYVE-type containing 28 [Source:HGNC Symbol;Acc:HGNC:29334]                           |
| ZNF107   | zinc finger protein 107 [Source:HGNC Symbol;Acc:HGNC:12887]                                       |
| ZNF831   | zinc finger protein 831 [Source:HGNC Symbol;Acc:HGNC:16167]                                       |
| APBA2    | amyloid beta precursor protein binding family A member 2 [Source:HGNC Symbol;Acc:HGNC:579]        |
| ARHGAP8  | Rho GTPase activating protein 8 [Source:HGNC Symbol;Acc:HGNC:677]                                 |
| ATAD1    | ATPase family, AAA domain containing 1 [Source:HGNC Symbol;Acc:HGNC:25903]                        |
| CRB3     | crumbs 3, cell polarity complex component [Source:HGNC Symbol;Acc:HGNC:20237]                     |
| IREB2    | iron responsive element binding protein 2 [Source:HGNC Symbol;Acc:HGNC:6115]                      |
| IRF8     | interferon regulatory factor 8 [Source:HGNC Symbol;Acc:HGNC:5358]                                 |
| MAGIX    | MAGI family member, X-linked [Source:HGNC Symbol;Acc:HGNC:30006]                                  |

|          |                                                                                                               |
|----------|---------------------------------------------------------------------------------------------------------------|
| POMGNT2  | protein O-linked mannose N-acetylglucosaminyltransferase 2 (beta 1,4-)<br>[Source:HGNC Symbol;Acc:HGNC:25902] |
| SHTN1    | shootin 1 [Source:HGNC Symbol;Acc:HGNC:29319]                                                                 |
| SLC23A2  | solute carrier family 23 member 2 [Source:HGNC Symbol;Acc:HGNC:10973]                                         |
| TMEM139  | transmembrane protein 139 [Source:HGNC Symbol;Acc:HGNC:22058]                                                 |
| TTLL3    | tubulin tyrosine ligase like 3 [Source:HGNC Symbol;Acc:HGNC:24483]                                            |
| ADAMTS12 | ADAM metalloproteinase with thrombospondin type 1 motif 12 [Source:HGNC<br>Symbol;Acc:HGNC:14605]             |
| ADCK2    | aarF domain containing kinase 2 [Source:HGNC Symbol;Acc:HGNC:19039]                                           |
| ANKRD2   | ankyrin repeat domain 2 [Source:HGNC Symbol;Acc:HGNC:495]                                                     |
| APOL6    | apolipoprotein L6 [Source:HGNC Symbol;Acc:HGNC:14870]                                                         |
| BTN2A1   | butyrophilin subfamily 2 member A1 [Source:HGNC Symbol;Acc:HGNC:1136]                                         |
| CA14     | carbonic anhydrase 14 [Source:HGNC Symbol;Acc:HGNC:1372]                                                      |
| CD1A     | CD1a molecule [Source:HGNC Symbol;Acc:HGNC:1634]                                                              |
| CIB3     | calcium and integrin binding family member 3 [Source:HGNC<br>Symbol;Acc:HGNC:24580]                           |
| CLDN15   | claudin 15 [Source:HGNC Symbol;Acc:HGNC:2036]                                                                 |
| LRIF1    | ligand dependent nuclear receptor interacting factor 1 [Source:HGNC<br>Symbol;Acc:HGNC:30299]                 |
| MACC1    | metastasis associated in colon cancer 1 [Source:HGNC Symbol;Acc:HGNC:30215]                                   |
| MUL1     | mitochondrial E3 ubiquitin protein ligase 1 [Source:HGNC Symbol;Acc:HGNC:25762]                               |
| NMNAT3   | nicotinamide nucleotide adenyltransferase 3 [Source:HGNC<br>Symbol;Acc:HGNC:20989]                            |
| NOL9     | nucleolar protein 9 [Source:HGNC Symbol;Acc:HGNC:26265]                                                       |
| NXPE2    | neurexophilin and PC-esterase domain family member 2 [Source:HGNC<br>Symbol;Acc:HGNC:26331]                   |
| RPP38    | ribonuclease P/MRP subunit p38 [Source:HGNC Symbol;Acc:HGNC:30329]                                            |
| SLC30A8  | solute carrier family 30 member 8 [Source:HGNC Symbol;Acc:HGNC:20303]                                         |
| SLITRK5  | SLIT and NTRK like family member 5 [Source:HGNC Symbol;Acc:HGNC:20295]                                        |
| SPRR1B   | small proline rich protein 1B [Source:HGNC Symbol;Acc:HGNC:11260]                                             |
| TM2D1    | TM2 domain containing 1 [Source:HGNC Symbol;Acc:HGNC:24142]                                                   |
| TMEM125  | transmembrane protein 125 [Source:HGNC Symbol;Acc:HGNC:28275]                                                 |
| VARS     | valyl-tRNA synthetase [Source:HGNC Symbol;Acc:HGNC:12651]                                                     |
| ZNF114   | zinc finger protein 114 [Source:HGNC Symbol;Acc:HGNC:12894]                                                   |
| ZNF286A  | zinc finger protein 286A [Source:HGNC Symbol;Acc:HGNC:13501]                                                  |
| ZNF644   | zinc finger protein 644 [Source:HGNC Symbol;Acc:HGNC:29222]                                                   |
| GLOD5    | glyoxalase domain containing 5 [Source:HGNC Symbol;Acc:HGNC:33358]                                            |
| IL17C    | interleukin 17C [Source:HGNC Symbol;Acc:HGNC:5983]                                                            |
| KRT76    | keratin 76 [Source:HGNC Symbol;Acc:HGNC:24430]                                                                |
| ARHGEF5  | Rho guanine nucleotide exchange factor 5 [Source:HGNC Symbol;Acc:HGNC:13209]                                  |
| GRID1    | glutamate ionotropic receptor delta type subunit 1 [Source:HGNC<br>Symbol;Acc:HGNC:4575]                      |
| LRRC1    | leucine rich repeat containing 1 [Source:HGNC Symbol;Acc:HGNC:14307]                                          |

|          |                                                                                                   |
|----------|---------------------------------------------------------------------------------------------------|
| MRAP2    | melanocortin 2 receptor accessory protein 2 [Source:HGNC Symbol;Acc:HGNC:21232]                   |
| SRCAP    | Snf2-related CREBBP activator protein [Source:HGNC Symbol;Acc:HGNC:16974]                         |
| SVIP     | small VCP/p97-interacting protein [Source:HGNC Symbol;Acc:HGNC:25238]                             |
| TRIM29   | tripartite motif containing 29 [Source:HGNC Symbol;Acc:HGNC:17274]                                |
| ABHD17B  | abhydrolase domain containing 17B [Source:HGNC Symbol;Acc:HGNC:24278]                             |
| ACSBG1   | acyl-CoA synthetase bubblegum family member 1 [Source:HGNC Symbol;Acc:HGNC:29567]                 |
| B3GNT7   | UDP-GlcNAc:betaGal beta-1,3-N-acetylglucosaminyltransferase 7 [Source:HGNC Symbol;Acc:HGNC:18811] |
| CAAP1    | caspase activity and apoptosis inhibitor 1 [Source:HGNC Symbol;Acc:HGNC:25834]                    |
| FAM72D   | family with sequence similarity 72 member D [Source:HGNC Symbol;Acc:HGNC:33593]                   |
| GABBR2   | gamma-aminobutyric acid type B receptor subunit 2 [Source:HGNC Symbol;Acc:HGNC:4507]              |
| IL1RAPL2 | interleukin 1 receptor accessory protein like 2 [Source:HGNC Symbol;Acc:HGNC:5997]                |
| MAML2    | mastermind like transcriptional coactivator 2 [Source:HGNC Symbol;Acc:HGNC:16259]                 |
| NMD3     | NMD3 ribosome export adaptor [Source:HGNC Symbol;Acc:HGNC:24250]                                  |
| NPIP3    | nuclear pore complex interacting protein family member B3 [Source:HGNC Symbol;Acc:HGNC:28989]     |
| NXPE3    | neurexophilin and PC-esterase domain family member 3 [Source:HGNC Symbol;Acc:HGNC:28238]          |
| PFKFB4   | 6-phosphofructo-2-kinase/fructose-2,6-biphosphatase 4 [Source:HGNC Symbol;Acc:HGNC:8875]          |
| PLET1    | placenta expressed transcript 1 [Source:HGNC Symbol;Acc:HGNC:30053]                               |
| PNMA2    | paraneoplastic Ma antigen 2 [Source:HGNC Symbol;Acc:HGNC:9159]                                    |
| PPP1R27  | protein phosphatase 1 regulatory subunit 27 [Source:HGNC Symbol;Acc:HGNC:16813]                   |
| R3HCC1L  | R3H domain and coiled-coil containing 1 like [Source:HGNC Symbol;Acc:HGNC:23512]                  |
| SLC34A2  | solute carrier family 34 member 2 [Source:HGNC Symbol;Acc:HGNC:11020]                             |
| SLC35A3  | solute carrier family 35 member A3 [Source:HGNC Symbol;Acc:HGNC:11023]                            |
| ZNF443   | zinc finger protein 443 [Source:HGNC Symbol;Acc:HGNC:20878]                                       |
| ZNF552   | zinc finger protein 552 [Source:HGNC Symbol;Acc:HGNC:26135]                                       |
| ZSWIM3   | zinc finger SWIM-type containing 3 [Source:HGNC Symbol;Acc:HGNC:16157]                            |
| ANKRD37  | ankyrin repeat domain 37 [Source:HGNC Symbol;Acc:HGNC:29593]                                      |
| DOCK2    | dedicator of cytokinesis 2 [Source:HGNC Symbol;Acc:HGNC:2988]                                     |
| FZD10    | frizzled class receptor 10 [Source:HGNC Symbol;Acc:HGNC:4039]                                     |
| GPR87    | G protein-coupled receptor 87 [Source:HGNC Symbol;Acc:HGNC:4538]                                  |
| HOXA9    | homeobox A9 [Source:HGNC Symbol;Acc:HGNC:5109]                                                    |
| IAH1     | isoamyl acetate-hydrolyzing esterase 1 homolog [Source:HGNC Symbol;Acc:HGNC:27696]                |
| KCTD14   | potassium channel tetramerization domain containing 14 [Source:HGNC Symbol;Acc:HGNC:23295]        |
| MUC13    | mucin 13, cell surface associated [Source:HGNC Symbol;Acc:HGNC:7511]                              |
| PALB2    | partner and localizer of BRCA2 [Source:HGNC Symbol;Acc:HGNC:26144]                                |



|          |                                                                                                    |
|----------|----------------------------------------------------------------------------------------------------|
| PAM      | peptidylglycine alpha-amidating monooxygenase [Source:HGNC Symbol;Acc:HGNC:8596]                   |
| SAMD11   | sterile alpha motif domain containing 11 [Source:HGNC Symbol;Acc:HGNC:28706]                       |
| SPECC1   | sperm antigen with calponin homology and coiled-coil domains 1 [Source:HGNC Symbol;Acc:HGNC:30615] |
| TRIM8    | tripartite motif containing 8 [Source:HGNC Symbol;Acc:HGNC:15579]                                  |
| TRIP4    | thyroid hormone receptor interactor 4 [Source:HGNC Symbol;Acc:HGNC:12310]                          |
| WIPI1    | WD repeat domain, phosphoinositide interacting 1 [Source:HGNC Symbol;Acc:HGNC:25471]               |
| YAF2     | YY1 associated factor 2 [Source:HGNC Symbol;Acc:HGNC:17363]                                        |
| IFNA2    | interferon, alpha 2 [Source:HGNC Symbol;Acc:HGNC:5423]                                             |
| NOX3     | NADPH oxidase 3 [Source:HGNC Symbol;Acc:HGNC:7890]                                                 |
| INTU     | inturned planar cell polarity protein [Source:HGNC Symbol;Acc:HGNC:29239]                          |
| LRRC40   | leucine rich repeat containing 40 [Source:HGNC Symbol;Acc:HGNC:26004]                              |
| MAP7D2   | MAP7 domain containing 2 [Source:HGNC Symbol;Acc:HGNC:25899]                                       |
| OVOL1    | ovo like transcriptional repressor 1 [Source:HGNC Symbol;Acc:HGNC:8525]                            |
| PAOX     | polyamine oxidase (exo-N4-amino) [Source:HGNC Symbol;Acc:HGNC:20837]                               |
| PAX5     | paired box 5 [Source:HGNC Symbol;Acc:HGNC:8619]                                                    |
| RABL3    | RAB, member of RAS oncogene family like 3 [Source:HGNC Symbol;Acc:HGNC:18072]                      |
| SCML1    | sex comb on midleg-like 1 (Drosophila) [Source:HGNC Symbol;Acc:HGNC:10580]                         |
| ALAS2    | 5'-aminolevulinate synthase 2 [Source:HGNC Symbol;Acc:HGNC:397]                                    |
| CHRNA9   | cholinergic receptor nicotinic alpha 9 subunit [Source:HGNC Symbol;Acc:HGNC:14079]                 |
| DZANK1   | double zinc ribbon and ankyrin repeat domains 1 [Source:HGNC Symbol;Acc:HGNC:15858]                |
| ESRP2    | epithelial splicing regulatory protein 2 [Source:HGNC Symbol;Acc:HGNC:26152]                       |
| FAM167A  | family with sequence similarity 167 member A [Source:HGNC Symbol;Acc:HGNC:15549]                   |
| HOOK1    | hook microtubule-tethering protein 1 [Source:HGNC Symbol;Acc:HGNC:19884]                           |
| IBTK     | inhibitor of Bruton tyrosine kinase [Source:HGNC Symbol;Acc:HGNC:17853]                            |
| LPAR1    | lysophosphatidic acid receptor 1 [Source:HGNC Symbol;Acc:HGNC:3166]                                |
| OMP      | olfactory marker protein [Source:HGNC Symbol;Acc:HGNC:8136]                                        |
| PORCN    | porcupine homolog (Drosophila) [Source:HGNC Symbol;Acc:HGNC:17652]                                 |
| TAC3     | tachykinin 3 [Source:HGNC Symbol;Acc:HGNC:11521]                                                   |
| TCN1     | transcobalamin 1 [Source:HGNC Symbol;Acc:HGNC:11652]                                               |
| TP53I11  | tumor protein p53 inducible protein 11 [Source:HGNC Symbol;Acc:HGNC:16842]                         |
| TP53I13  | tumor protein p53 inducible protein 13 [Source:HGNC Symbol;Acc:HGNC:25102]                         |
| VPS53    | VPS53, GARP complex subunit [Source:HGNC Symbol;Acc:HGNC:25608]                                    |
| ZNF256   | zinc finger protein 256 [Source:HGNC Symbol;Acc:HGNC:13049]                                        |
| ZP1      | zona pellucida glycoprotein 1 [Source:HGNC Symbol;Acc:HGNC:13187]                                  |
| ANKRD18A | ankyrin repeat domain 18A [Source:HGNC Symbol;Acc:HGNC:23643]                                      |
| QARS     | glutaminyl-tRNA synthetase [Source:HGNC Symbol;Acc:HGNC:9751]                                      |

|            |                                                                                                              |
|------------|--------------------------------------------------------------------------------------------------------------|
| VSIG2      | V-set and immunoglobulin domain containing 2 [Source:HGNC Symbol;Acc:HGNC:17149]                             |
| YARS       | tyrosyl-tRNA synthetase [Source:HGNC Symbol;Acc:HGNC:12840]                                                  |
| BICDL1     | BICD family like cargo adaptor 1 [Source:HGNC Symbol;Acc:HGNC:28095]                                         |
| FABP2      | fatty acid binding protein 2 [Source:HGNC Symbol;Acc:HGNC:3556]                                              |
| HCLS1      | hematopoietic cell-specific Lyn substrate 1 [Source:HGNC Symbol;Acc:HGNC:4844]                               |
| LRRN1      | leucine rich repeat neuronal 1 [Source:HGNC Symbol;Acc:HGNC:20980]                                           |
| LSM11      | LSM11, U7 small nuclear RNA associated [Source:HGNC Symbol;Acc:HGNC:30860]                                   |
| MARVELD2   | MARVEL domain containing 2 [Source:HGNC Symbol;Acc:HGNC:26401]                                               |
| PPM1L      | protein phosphatase, Mg <sup>2+</sup> /Mn <sup>2+</sup> dependent 1L [Source:HGNC Symbol;Acc:HGNC:16381]     |
| PRSS1      | protease, serine 1 [Source:HGNC Symbol;Acc:HGNC:9475]                                                        |
| RASSF8     | Ras association domain family member 8 [Source:HGNC Symbol;Acc:HGNC:13232]                                   |
| TMEM209    | transmembrane protein 209 [Source:HGNC Symbol;Acc:HGNC:21898]                                                |
| TRPV3      | transient receptor potential cation channel subfamily V member 3 [Source:HGNC Symbol;Acc:HGNC:18084]         |
| USP31      | ubiquitin specific peptidase 31 [Source:HGNC Symbol;Acc:HGNC:20060]                                          |
| AATK       | apoptosis associated tyrosine kinase [Source:HGNC Symbol;Acc:HGNC:21]                                        |
| ARHGAP28   | Rho GTPase activating protein 28 [Source:HGNC Symbol;Acc:HGNC:25509]                                         |
| CDO1       | cysteine dioxygenase type 1 [Source:HGNC Symbol;Acc:HGNC:1795]                                               |
| CLIC6      | chloride intracellular channel 6 [Source:HGNC Symbol;Acc:HGNC:2065]                                          |
| FAM89B     | family with sequence similarity 89 member B [Source:HGNC Symbol;Acc:HGNC:16708]                              |
| FMN2       | formin 2 [Source:HGNC Symbol;Acc:HGNC:14074]                                                                 |
| HOXB2      | homeobox B2 [Source:HGNC Symbol;Acc:HGNC:5113]                                                               |
| MFSD6      | major facilitator superfamily domain containing 6 [Source:HGNC Symbol;Acc:HGNC:24711]                        |
| MCAT       | malonyl-CoA-acyl carrier protein transacylase [Source:HGNC Symbol;Acc:HGNC:29622]                            |
| PUS7       | pseudouridylate synthase 7 (putative) [Source:HGNC Symbol;Acc:HGNC:26033]                                    |
| RBM4       | RNA binding motif protein 4 [Source:HGNC Symbol;Acc:HGNC:9901]                                               |
| RNF24      | ring finger protein 24 [Source:HGNC Symbol;Acc:HGNC:13779]                                                   |
| ST6GALNAC5 | ST6 N-acetylgalactosaminide alpha-2,6-sialyltransferase 5 [Source:HGNC Symbol;Acc:HGNC:19342]                |
| A4GALT     | alpha 1,4-galactosyltransferase [Source:HGNC Symbol;Acc:HGNC:18149]                                          |
| MMGT1      | membrane magnesium transporter 1 [Source:HGNC Symbol;Acc:HGNC:28100]                                         |
| SPOCK2     | sparc/osteonectin, cwcv and kazal-like domains proteoglycan (testican) 2 [Source:HGNC Symbol;Acc:HGNC:13564] |
| NKX1-2     | NK1 homeobox 2 [Source:HGNC Symbol;Acc:HGNC:31652]                                                           |
| B4GALNT1   | beta-1,4-N-acetyl-galactosaminyltransferase 1 [Source:HGNC Symbol;Acc:HGNC:4117]                             |
| BMX        | BMX non-receptor tyrosine kinase [Source:HGNC Symbol;Acc:HGNC:1079]                                          |
| CNEP1R1    | CTD nuclear envelope phosphatase 1 regulatory subunit 1 [Source:HGNC Symbol;Acc:HGNC:26759]                  |

|          |                                                                                                                              |
|----------|------------------------------------------------------------------------------------------------------------------------------|
| DCAF8    | DDB1 and CUL4 associated factor 8 [Source:HGNC Symbol;Acc:HGNC:24891]                                                        |
| HCFC1R1  | host cell factor C1 regulator 1 [Source:HGNC Symbol;Acc:HGNC:21198]                                                          |
| NABP2    | nucleic acid binding protein 2 [Source:HGNC Symbol;Acc:HGNC:28412]                                                           |
| NHLRC2   | NHL repeat containing 2 [Source:HGNC Symbol;Acc:HGNC:24731]                                                                  |
| SDHAF2   | succinate dehydrogenase complex assembly factor 2 [Source:HGNC Symbol;Acc:HGNC:26034]                                        |
| SH3YL1   | SH3 and SYLF domain containing 1 [Source:HGNC Symbol;Acc:HGNC:29546]                                                         |
| SLAMF8   | SLAM family member 8 [Source:HGNC Symbol;Acc:HGNC:21391]                                                                     |
| SNAPC2   | small nuclear RNA activating complex polypeptide 2 [Source:HGNC Symbol;Acc:HGNC:11135]                                       |
| TBX4     | T-box 4 [Source:HGNC Symbol;Acc:HGNC:11603]                                                                                  |
| TDRD3    | tudor domain containing 3 [Source:HGNC Symbol;Acc:HGNC:20612]                                                                |
| VPS45    | vacuolar protein sorting 45 homolog [Source:HGNC Symbol;Acc:HGNC:14579]                                                      |
| ABCA9    | ATP binding cassette subfamily A member 9 [Source:HGNC Symbol;Acc:HGNC:39]                                                   |
| ATP6V1C2 | ATPase H <sup>+</sup> transporting V1 subunit C2 [Source:HGNC Symbol;Acc:HGNC:18264]                                         |
| DISC1    | disrupted in schizophrenia 1 [Source:HGNC Symbol;Acc:HGNC:2888]                                                              |
| EPB41L4A | erythrocyte membrane protein band 4.1 like 4A [Source:HGNC Symbol;Acc:HGNC:13278]                                            |
| FOXP1    | forkhead box P1 [Source:HGNC Symbol;Acc:HGNC:12765]                                                                          |
| HPR      | haptoglobin-related protein [Source:HGNC Symbol;Acc:HGNC:5156]                                                               |
| KRIT1    | KRIT1, ankyrin repeat containing [Source:HGNC Symbol;Acc:HGNC:1573]                                                          |
| LGALS7   | galectin 7 [Source:HGNC Symbol;Acc:HGNC:6568]                                                                                |
| MED25    | mediator complex subunit 25 [Source:HGNC Symbol;Acc:HGNC:28845]                                                              |
| RBKS     | ribokinase [Source:HGNC Symbol;Acc:HGNC:30325]                                                                               |
| RPUSD1   | RNA pseudouridylation synthase domain containing 1 [Source:HGNC Symbol;Acc:HGNC:14173]                                       |
| SNCAIP   | synuclein alpha interacting protein [Source:HGNC Symbol;Acc:HGNC:11139]                                                      |
| SNX11    | sorting nexin 11 [Source:HGNC Symbol;Acc:HGNC:14975]                                                                         |
| SYT17    | synaptotagmin 17 [Source:HGNC Symbol;Acc:HGNC:24119]                                                                         |
| VKORC1L1 | vitamin K epoxide reductase complex subunit 1 like 1 [Source:HGNC Symbol;Acc:HGNC:21492]                                     |
| ATP5G2   | ATP synthase, H <sup>+</sup> transporting, mitochondrial Fo complex subunit C2 (subunit 9) [Source:HGNC Symbol;Acc:HGNC:842] |
| C2orf69  | chromosome 2 open reading frame 69 [Source:HGNC Symbol;Acc:HGNC:26799]                                                       |
| STRIP1   | striatin interacting protein 1 [Source:HGNC Symbol;Acc:HGNC:25916]                                                           |
| TBATA    | thymus, brain and testes associated [Source:HGNC Symbol;Acc:HGNC:23511]                                                      |
| WARS     | tryptophanyl-tRNA synthetase [Source:HGNC Symbol;Acc:HGNC:12729]                                                             |
| ESRP1    | epithelial splicing regulatory protein 1 [Source:HGNC Symbol;Acc:HGNC:25966]                                                 |
| GJA3     | gap junction protein alpha 3 [Source:HGNC Symbol;Acc:HGNC:4277]                                                              |
| ITPR1L2  | inositol 1,4,5-trisphosphate receptor interacting protein-like 2 [Source:HGNC Symbol;Acc:HGNC:27257]                         |
| KCNE2    | potassium voltage-gated channel subfamily E regulatory subunit 2 [Source:HGNC Symbol;Acc:HGNC:6242]                          |

|          |                                                                                                                        |
|----------|------------------------------------------------------------------------------------------------------------------------|
| MYEF2    | myelin expression factor 2 [Source:HGNC Symbol;Acc:HGNC:17940]                                                         |
| MYO9A    | myosin IXA [Source:HGNC Symbol;Acc:HGNC:7608]                                                                          |
| OTUD4    | OTU deubiquitinase 4 [Source:HGNC Symbol;Acc:HGNC:24949]                                                               |
| RHOD     | ras homolog family member D [Source:HGNC Symbol;Acc:HGNC:670]                                                          |
| SMG1     | SMG1, nonsense mediated mRNA decay associated PI3K related kinase [Source:HGNC Symbol;Acc:HGNC:30045]                  |
| TMEM204  | transmembrane protein 204 [Source:HGNC Symbol;Acc:HGNC:14158]                                                          |
| ACSS3    | acyl-CoA synthetase short-chain family member 3 [Source:HGNC Symbol;Acc:HGNC:24723]                                    |
| AMELX    | amelogenin, X-linked [Source:HGNC Symbol;Acc:HGNC:461]                                                                 |
| ATXN7L3B | ataxin 7 like 3B [Source:HGNC Symbol;Acc:HGNC:37931]                                                                   |
| BTBD6    | BTB domain containing 6 [Source:HGNC Symbol;Acc:HGNC:19897]                                                            |
| CDC14A   | cell division cycle 14A [Source:HGNC Symbol;Acc:HGNC:1718]                                                             |
| CERCAM   | cerebral endothelial cell adhesion molecule [Source:HGNC Symbol;Acc:HGNC:23723]                                        |
| CHST2    | carbohydrate sulfotransferase 2 [Source:HGNC Symbol;Acc:HGNC:1970]                                                     |
| CLDN23   | claudin 23 [Source:HGNC Symbol;Acc:HGNC:17591]                                                                         |
| DIP2C    | disco interacting protein 2 homolog C [Source:HGNC Symbol;Acc:HGNC:29150]                                              |
| EPHX4    | epoxide hydrolase 4 [Source:HGNC Symbol;Acc:HGNC:23758]                                                                |
| INPP5K   | inositol polyphosphate-5-phosphatase K [Source:HGNC Symbol;Acc:HGNC:33882]                                             |
| NDUFAF7  | NADH:ubiquinone oxidoreductase complex assembly factor 7 [Source:HGNC Symbol;Acc:HGNC:28816]                           |
| NKD2     | naked cuticle homolog 2 [Source:HGNC Symbol;Acc:HGNC:17046]                                                            |
| PCLO     | piccolo presynaptic cytomatrix protein [Source:HGNC Symbol;Acc:HGNC:13406]                                             |
| PPTC7    | PTC7 protein phosphatase homolog [Source:HGNC Symbol;Acc:HGNC:30695]                                                   |
| RAB3IP   | RAB3A interacting protein [Source:HGNC Symbol;Acc:HGNC:16508]                                                          |
| RNF208   | ring finger protein 208 [Source:HGNC Symbol;Acc:HGNC:25420]                                                            |
| SUSD3    | sushi domain containing 3 [Source:HGNC Symbol;Acc:HGNC:28391]                                                          |
| TADA3    | transcriptional adaptor 3 [Source:HGNC Symbol;Acc:HGNC:19422]                                                          |
| TREML1   | triggering receptor expressed on myeloid cells like 1 [Source:HGNC Symbol;Acc:HGNC:20434]                              |
| VAMP4    | vesicle associated membrane protein 4 [Source:HGNC Symbol;Acc:HGNC:12645]                                              |
| ABCA8    | ATP binding cassette subfamily A member 8 [Source:HGNC Symbol;Acc:HGNC:38]                                             |
| ARHGEF16 | Rho guanine nucleotide exchange factor 16 [Source:HGNC Symbol;Acc:HGNC:15515]                                          |
| ARL5A    | ADP ribosylation factor like GTPase 5A [Source:HGNC Symbol;Acc:HGNC:696]                                               |
| ARMCX2   | armadillo repeat containing, X-linked 2 [Source:HGNC Symbol;Acc:HGNC:16869]                                            |
| BCCIP    | BRCA2 and CDKN1A interacting protein [Source:HGNC Symbol;Acc:HGNC:978]                                                 |
| BICD1    | BICD cargo adaptor 1 [Source:HGNC Symbol;Acc:HGNC:1049]                                                                |
| C1GALT1  | core 1 synthase, glycoprotein-N-acetylgalactosamine 3-beta-galactosyltransferase 1 [Source:HGNC Symbol;Acc:HGNC:24337] |
| CELSR1   | cadherin EGF LAG seven-pass G-type receptor 1 [Source:HGNC Symbol;Acc:HGNC:1850]                                       |
| CHMP4C   | charged multivesicular body protein 4C [Source:HGNC Symbol;Acc:HGNC:30599]                                             |
| EIF5A2   | eukaryotic translation initiation factor 5A2 [Source:HGNC Symbol;Acc:HGNC:3301]                                        |

|         |                                                                                               |
|---------|-----------------------------------------------------------------------------------------------|
| GJB3    | gap junction protein beta 3 [Source:HGNC Symbol;Acc:HGNC:4285]                                |
| HDDC3   | HD domain containing 3 [Source:HGNC Symbol;Acc:HGNC:30522]                                    |
| JPH1    | junctophilin 1 [Source:HGNC Symbol;Acc:HGNC:14201]                                            |
| KCNJ16  | potassium voltage-gated channel subfamily J member 16 [Source:HGNC Symbol;Acc:HGNC:6262]      |
| LLGL2   | LLGL2, scribble cell polarity complex component [Source:HGNC Symbol;Acc:HGNC:6629]            |
| METRN   | meteorin, glial cell differentiation regulator [Source:HGNC Symbol;Acc:HGNC:14151]            |
| NECTIN4 | nectin cell adhesion molecule 4 [Source:HGNC Symbol;Acc:HGNC:19688]                           |
| PAK6    | p21 (RAC1) activated kinase 6 [Source:HGNC Symbol;Acc:HGNC:16061]                             |
| PDCD6   | programmed cell death 6 [Source:HGNC Symbol;Acc:HGNC:8765]                                    |
| PHF6    | PHD finger protein 6 [Source:HGNC Symbol;Acc:HGNC:18145]                                      |
| PPP2R3A | protein phosphatase 2 regulatory subunit B''alpha [Source:HGNC Symbol;Acc:HGNC:9307]          |
| PSTPIP2 | proline-serine-threonine phosphatase interacting protein 2 [Source:HGNC Symbol;Acc:HGNC:9581] |
| RASEF   | RAS and EF-hand domain containing [Source:HGNC Symbol;Acc:HGNC:26464]                         |
| RNASE4  | ribonuclease A family member 4 [Source:HGNC Symbol;Acc:HGNC:10047]                            |
| SBSPON  | somatomedin B and thrombospondin type 1 domain containing [Source:HGNC Symbol;Acc:HGNC:30362] |
| TFB2M   | transcription factor B2, mitochondrial [Source:HGNC Symbol;Acc:HGNC:18559]                    |
| RAB9A   | RAB9A, member RAS oncogene family [Source:HGNC Symbol;Acc:HGNC:9792]                          |
| TMEM181 | transmembrane protein 181 [Source:HGNC Symbol;Acc:HGNC:20958]                                 |
| ZKSCAN2 | zinc finger with KRAB and SCAN domains 2 [Source:HGNC Symbol;Acc:HGNC:25677]                  |
| ACTR1B  | ARP1 actin-related protein 1 homolog B, centractin beta [Source:HGNC Symbol;Acc:HGNC:168]     |
| ADGRE2  | adhesion G protein-coupled receptor E2 [Source:HGNC Symbol;Acc:HGNC:3337]                     |
| ALPP    | alkaline phosphatase, placental [Source:HGNC Symbol;Acc:HGNC:439]                             |
| CCDC97  | coiled-coil domain containing 97 [Source:HGNC Symbol;Acc:HGNC:28289]                          |
| CREB3L1 | cAMP responsive element binding protein 3 like 1 [Source:HGNC Symbol;Acc:HGNC:18856]          |
| DGKG    | diacylglycerol kinase gamma [Source:HGNC Symbol;Acc:HGNC:2853]                                |
| EREG    | epiregulin [Source:HGNC Symbol;Acc:HGNC:3443]                                                 |
| FBRS    | fibrosin [Source:HGNC Symbol;Acc:HGNC:20442]                                                  |
| GALNT12 | polypeptide N-acetylgalactosaminyltransferase 12 [Source:HGNC Symbol;Acc:HGNC:19877]          |
| HES3    | hes family bHLH transcription factor 3 [Source:HGNC Symbol;Acc:HGNC:26226]                    |
| HES7    | hes family bHLH transcription factor 7 [Source:HGNC Symbol;Acc:HGNC:15977]                    |
| LRP11   | LDL receptor related protein 11 [Source:HGNC Symbol;Acc:HGNC:16936]                           |
| MAN1A1  | mannosidase alpha class 1A member 1 [Source:HGNC Symbol;Acc:HGNC:6821]                        |
| PLEKHG3 | pleckstrin homology and RhoGEF domain containing G3 [Source:HGNC Symbol;Acc:HGNC:20364]       |
| RAB42   | RAB42, member RAS oncogene family [Source:HGNC Symbol;Acc:HGNC:28702]                         |

|          |                                                                                                   |
|----------|---------------------------------------------------------------------------------------------------|
| RASAL3   | RAS protein activator like 3 [Source:HGNC Symbol;Acc:HGNC:26129]                                  |
| RTF1     | RTF1 homolog, Paf1/RNA polymerase II complex component [Source:HGNC Symbol;Acc:HGNC:28996]        |
| SLC35D3  | solute carrier family 35 member D3 [Source:HGNC Symbol;Acc:HGNC:15621]                            |
| THAP3    | THAP domain containing 3 [Source:HGNC Symbol;Acc:HGNC:20855]                                      |
| TOP3B    | topoisomerase (DNA) III beta [Source:HGNC Symbol;Acc:HGNC:11993]                                  |
| TOX      | thymocyte selection associated high mobility group box [Source:HGNC Symbol;Acc:HGNC:18988]        |
| TRIM17   | tripartite motif containing 17 [Source:HGNC Symbol;Acc:HGNC:13430]                                |
| ZBTB1    | zinc finger and BTB domain containing 1 [Source:HGNC Symbol;Acc:HGNC:20259]                       |
| BATF     | basic leucine zipper ATF-like transcription factor [Source:HGNC Symbol;Acc:HGNC:958]              |
| DYNC1I1  | dynein cytoplasmic 1 intermediate chain 1 [Source:HGNC Symbol;Acc:HGNC:2963]                      |
| ENPP5    | ectonucleotide pyrophosphatase/phosphodiesterase 5 (putative) [Source:HGNC Symbol;Acc:HGNC:13717] |
| GALNT15  | polypeptide N-acetylgalactosaminyltransferase 15 [Source:HGNC Symbol;Acc:HGNC:21531]              |
| GPBP1    | GC-rich promoter binding protein 1 [Source:HGNC Symbol;Acc:HGNC:29520]                            |
| PLXNB1   | plexin B1 [Source:HGNC Symbol;Acc:HGNC:9103]                                                      |
| VGLL4    | vestigial like family member 4 [Source:HGNC Symbol;Acc:HGNC:28966]                                |
| ZCCHC24  | zinc finger CCHC-type containing 24 [Source:HGNC Symbol;Acc:HGNC:26911]                           |
| RAD9B    | RAD9 checkpoint clamp component B [Source:HGNC Symbol;Acc:HGNC:21700]                             |
| TUBGCP4  | tubulin gamma complex associated protein 4 [Source:HGNC Symbol;Acc:HGNC:16691]                    |
| AMY2A    | amylase, alpha 2A (pancreatic) [Source:HGNC Symbol;Acc:HGNC:477]                                  |
| C1QL3    | complement component 1, q subcomponent-like 3 [Source:HGNC Symbol;Acc:HGNC:19359]                 |
| C15orf57 | chromosome 15 open reading frame 57 [Source:HGNC Symbol;Acc:HGNC:28295]                           |
| MB21D1   | Mab-21 domain containing 1 [Source:HGNC Symbol;Acc:HGNC:21367]                                    |
| EHF      | ETS homologous factor [Source:HGNC Symbol;Acc:HGNC:3246]                                          |
| FSTL5    | folliculin like 5 [Source:HGNC Symbol;Acc:HGNC:21386]                                             |
| HSH2D    | hematopoietic SH2 domain containing [Source:HGNC Symbol;Acc:HGNC:24920]                           |
| IL1RL2   | interleukin 1 receptor like 2 [Source:HGNC Symbol;Acc:HGNC:5999]                                  |
| KCNK4    | potassium two pore domain channel subfamily K member 4 [Source:HGNC Symbol;Acc:HGNC:6279]         |
| KLK6     | kallikrein related peptidase 6 [Source:HGNC Symbol;Acc:HGNC:6367]                                 |
| NEGR1    | neuronal growth regulator 1 [Source:HGNC Symbol;Acc:HGNC:17302]                                   |
| NPIPA1   | nuclear pore complex interacting protein family member A1 [Source:HGNC Symbol;Acc:HGNC:7909]      |
| SLC12A2  | solute carrier family 12 member 2 [Source:HGNC Symbol;Acc:HGNC:10911]                             |
| STON2    | stonin 2 [Source:HGNC Symbol;Acc:HGNC:30652]                                                      |
| SULT6B1  | sulfotransferase family 6B member 1 [Source:HGNC Symbol;Acc:HGNC:33433]                           |
| TC2N     | tandem C2 domains, nuclear [Source:HGNC Symbol;Acc:HGNC:19859]                                    |

|          |                                                                                                                |
|----------|----------------------------------------------------------------------------------------------------------------|
| TMTC3    | transmembrane and tetratricopeptide repeat containing 3 [Source:HGNC Symbol;Acc:HGNC:26899]                    |
| ZRANB2   | zinc finger RANBP2-type containing 2 [Source:HGNC Symbol;Acc:HGNC:13058]                                       |
| ATMIN    | ATM interactor [Source:HGNC Symbol;Acc:HGNC:29034]                                                             |
| DYRK3    | dual specificity tyrosine phosphorylation regulated kinase 3 [Source:HGNC Symbol;Acc:HGNC:3094]                |
| EPB41L4B | erythrocyte membrane protein band 4.1 like 4B [Source:HGNC Symbol;Acc:HGNC:19818]                              |
| GIPR     | gastric inhibitory polypeptide receptor [Source:HGNC Symbol;Acc:HGNC:4271]                                     |
| HECTD3   | HECT domain E3 ubiquitin protein ligase 3 [Source:HGNC Symbol;Acc:HGNC:26117]                                  |
| IL20RB   | interleukin 20 receptor subunit beta [Source:HGNC Symbol;Acc:HGNC:6004]                                        |
| IPO7     | importin 7 [Source:HGNC Symbol;Acc:HGNC:9852]                                                                  |
| KCTD1    | potassium channel tetramerization domain containing 1 [Source:HGNC Symbol;Acc:HGNC:18249]                      |
| KLHL29   | kelch like family member 29 [Source:HGNC Symbol;Acc:HGNC:29404]                                                |
| KRT9     | keratin 9 [Source:HGNC Symbol;Acc:HGNC:6447]                                                                   |
| MEIOB    | meiosis specific with OB domains [Source:HGNC Symbol;Acc:HGNC:28569]                                           |
| MPP7     | membrane palmitoylated protein 7 [Source:HGNC Symbol;Acc:HGNC:26542]                                           |
| MT1HL1   | metallothionein 1H-like 1 [Source:HGNC Symbol;Acc:HGNC:31864]                                                  |
| MYRFL    | myelin regulatory factor-like [Source:HGNC Symbol;Acc:HGNC:26316]                                              |
| OSR2     | odd-skipped related transcription factor 2 [Source:HGNC Symbol;Acc:HGNC:15830]                                 |
| PLPP4    | phospholipid phosphatase 4 [Source:HGNC Symbol;Acc:HGNC:23531]                                                 |
| POLR3GL  | polymerase (RNA) III subunit G like [Source:HGNC Symbol;Acc:HGNC:28466]                                        |
| PSCA     | prostate stem cell antigen [Source:HGNC Symbol;Acc:HGNC:9500]                                                  |
| RING1    | ring finger protein 1 [Source:HGNC Symbol;Acc:HGNC:10018]                                                      |
| RNF135   | ring finger protein 135 [Source:HGNC Symbol;Acc:HGNC:21158]                                                    |
| SFTPA1   | surfactant protein A1 [Source:HGNC Symbol;Acc:HGNC:10798]                                                      |
| TMEM30B  | transmembrane protein 30B [Source:HGNC Symbol;Acc:HGNC:27254]                                                  |
| TNPO3    | transportin 3 [Source:HGNC Symbol;Acc:HGNC:17103]                                                              |
| TRIM22   | tripartite motif containing 22 [Source:HGNC Symbol;Acc:HGNC:16379]                                             |
| C9orf40  | chromosome 9 open reading frame 40 [Source:HGNC Symbol;Acc:HGNC:23433]                                         |
| CCAR2    | cell cycle and apoptosis regulator 2 [Source:HGNC Symbol;Acc:HGNC:23360]                                       |
| T        | T brachyury transcription factor [Source:HGNC Symbol;Acc:HGNC:11515]                                           |
| AFF3     | AF4/FMR2 family member 3 [Source:HGNC Symbol;Acc:HGNC:6473]                                                    |
| EGLN3    | egl-9 family hypoxia inducible factor 3 [Source:HGNC Symbol;Acc:HGNC:14661]                                    |
| EVA1A    | eva-1 homolog A, regulator of programmed cell death [Source:HGNC Symbol;Acc:HGNC:25816]                        |
| HERC6    | HECT and RLD domain containing E3 ubiquitin protein ligase family member 6 [Source:HGNC Symbol;Acc:HGNC:26072] |
| NAP1L5   | nucleosome assembly protein 1 like 5 [Source:HGNC Symbol;Acc:HGNC:19968]                                       |
| NOVA1    | NOVA alternative splicing regulator 1 [Source:HGNC Symbol;Acc:HGNC:7886]                                       |
| SPINT1   | serine peptidase inhibitor, Kunitz type 1 [Source:HGNC Symbol;Acc:HGNC:11246]                                  |

|         |                                                                                                                      |
|---------|----------------------------------------------------------------------------------------------------------------------|
| AP1M2   | adaptor related protein complex 1 mu 2 subunit [Source:HGNC Symbol;Acc:HGNC:558]                                     |
| B4GALT6 | beta-1,4-galactosyltransferase 6 [Source:HGNC Symbol;Acc:HGNC:929]                                                   |
| BOP1    | block of proliferation 1 [Source:HGNC Symbol;Acc:HGNC:15519]                                                         |
| BTBD17  | BTB domain containing 17 [Source:HGNC Symbol;Acc:HGNC:33758]                                                         |
| COBLL1  | cordon-bleu WH2 repeat protein like 1 [Source:HGNC Symbol;Acc:HGNC:23571]                                            |
| CPEB3   | cytoplasmic polyadenylation element binding protein 3 [Source:HGNC Symbol;Acc:HGNC:21746]                            |
| FA2H    | fatty acid 2-hydroxylase [Source:HGNC Symbol;Acc:HGNC:21197]                                                         |
| FEZ2    | fasciculation and elongation protein zeta 2 [Source:HGNC Symbol;Acc:HGNC:3660]                                       |
| HEMGN   | hemogen [Source:HGNC Symbol;Acc:HGNC:17509]                                                                          |
| HOXA5   | homeobox A5 [Source:HGNC Symbol;Acc:HGNC:5106]                                                                       |
| LAMC2   | laminin subunit gamma 2 [Source:HGNC Symbol;Acc:HGNC:6493]                                                           |
| LGSN    | lengsin, lens protein with glutamine synthetase domain [Source:HGNC Symbol;Acc:HGNC:21016]                           |
| MAST4   | microtubule associated serine/threonine kinase family member 4 [Source:HGNC Symbol;Acc:HGNC:19037]                   |
| MOB3B   | MOB kinase activator 3B [Source:HGNC Symbol;Acc:HGNC:23825]                                                          |
| OLFM4   | olfactomedin 4 [Source:HGNC Symbol;Acc:HGNC:17190]                                                                   |
| PHF11   | PHD finger protein 11 [Source:HGNC Symbol;Acc:HGNC:17024]                                                            |
| THOC5   | THO complex 5 [Source:HGNC Symbol;Acc:HGNC:19074]                                                                    |
| TRIM16L | tripartite motif containing 16-like [Source:HGNC Symbol;Acc:HGNC:32670]                                              |
| CARD16  | caspase recruitment domain family member 16 [Source:HGNC Symbol;Acc:HGNC:33701]                                      |
| FAM222B | family with sequence similarity 222 member B [Source:HGNC Symbol;Acc:HGNC:25563]                                     |
| KCNS1   | potassium voltage-gated channel modifier subfamily S member 1 [Source:HGNC Symbol;Acc:HGNC:6300]                     |
| TRABD2A | TraB domain containing 2A [Source:HGNC Symbol;Acc:HGNC:27013]                                                        |
| ZNF25   | zinc finger protein 25 [Source:HGNC Symbol;Acc:HGNC:13043]                                                           |
| ATP5D   | ATP synthase, H <sup>+</sup> transporting, mitochondrial F1 complex, delta subunit [Source:HGNC Symbol;Acc:HGNC:837] |
| ATP8B4  | ATPase phospholipid transporting 8B4 (putative) [Source:HGNC Symbol;Acc:HGNC:13536]                                  |
| EPDR1   | ependymin related 1 [Source:HGNC Symbol;Acc:HGNC:17572]                                                              |
| FBXO43  | F-box protein 43 [Source:HGNC Symbol;Acc:HGNC:28521]                                                                 |
| FRMD4B  | FERM domain containing 4B [Source:HGNC Symbol;Acc:HGNC:24886]                                                        |
| FXD3    | FXD domain containing ion transport regulator 3 [Source:HGNC Symbol;Acc:HGNC:4027]                                   |
| GFOD1   | glucose-fructose oxidoreductase domain containing 1 [Source:HGNC Symbol;Acc:HGNC:21096]                              |
| GTPBP6  | GTP binding protein 6 (putative) [Source:HGNC Symbol;Acc:HGNC:30189]                                                 |
| IFT80   | intraflagellar transport 80 [Source:HGNC Symbol;Acc:HGNC:29262]                                                      |
| KMT2C   | lysine methyltransferase 2C [Source:HGNC Symbol;Acc:HGNC:13726]                                                      |



|          |                                                                                                                              |
|----------|------------------------------------------------------------------------------------------------------------------------------|
| KRT78    | keratin 78 [Source:HGNC Symbol;Acc:HGNC:28926]                                                                               |
| LAD1     | ladinin 1 [Source:HGNC Symbol;Acc:HGNC:6472]                                                                                 |
| LIMK2    | LIM domain kinase 2 [Source:HGNC Symbol;Acc:HGNC:6614]                                                                       |
| MAPK8IP2 | mitogen-activated protein kinase 8 interacting protein 2 [Source:HGNC Symbol;Acc:HGNC:6883]                                  |
| MITD1    | microtubule interacting and trafficking domain containing 1 [Source:HGNC Symbol;Acc:HGNC:25207]                              |
| MVD      | mevalonate diphosphate decarboxylase [Source:HGNC Symbol;Acc:HGNC:7529]                                                      |
| MYCL     | v-myc avian myelocytomatosis viral oncogene lung carcinoma derived homolog [Source:HGNC Symbol;Acc:HGNC:7555]                |
| MYO5C    | myosin VC [Source:HGNC Symbol;Acc:HGNC:7604]                                                                                 |
| MYO6     | myosin VI [Source:HGNC Symbol;Acc:HGNC:7605]                                                                                 |
| PDE8B    | phosphodiesterase 8B [Source:HGNC Symbol;Acc:HGNC:8794]                                                                      |
| PLA2G2E  | phospholipase A2 group IIE [Source:HGNC Symbol;Acc:HGNC:13414]                                                               |
| PPP3CC   | protein phosphatase 3 catalytic subunit gamma [Source:HGNC Symbol;Acc:HGNC:9316]                                             |
| RHAG     | Rh-associated glycoprotein [Source:HGNC Symbol;Acc:HGNC:10006]                                                               |
| S100A7   | S100 calcium binding protein A7 [Source:HGNC Symbol;Acc:HGNC:10497]                                                          |
| SLC24A3  | solute carrier family 24 member 3 [Source:HGNC Symbol;Acc:HGNC:10977]                                                        |
| SMG5     | SMG5, nonsense mediated mRNA decay factor [Source:HGNC Symbol;Acc:HGNC:24644]                                                |
| SPATS2L  | spermatogenesis associated serine rich 2 like [Source:HGNC Symbol;Acc:HGNC:24574]                                            |
| SPOCK1   | sparc/osteonectin, cwcv and kazal-like domains proteoglycan (testican) 1 [Source:HGNC Symbol;Acc:HGNC:11251]                 |
| ST3GAL4  | ST3 beta-galactoside alpha-2,3-sialyltransferase 4 [Source:HGNC Symbol;Acc:HGNC:10864]                                       |
| TELO2    | telomere maintenance 2 [Source:HGNC Symbol;Acc:HGNC:29099]                                                                   |
| TEX19    | testis expressed 19 [Source:HGNC Symbol;Acc:HGNC:33802]                                                                      |
| TMCC3    | transmembrane and coiled-coil domain family 3 [Source:HGNC Symbol;Acc:HGNC:29199]                                            |
| TUSC2    | tumor suppressor candidate 2 [Source:HGNC Symbol;Acc:HGNC:17034]                                                             |
| TUSC3    | tumor suppressor candidate 3 [Source:HGNC Symbol;Acc:HGNC:30242]                                                             |
| HTRA3    | HtrA serine peptidase 3 [Source:HGNC Symbol;Acc:HGNC:30406]                                                                  |
| IFNAR2   | interferon alpha and beta receptor subunit 2 [Source:HGNC Symbol;Acc:HGNC:5433]                                              |
| RGS17    | regulator of G-protein signaling 17 [Source:HGNC Symbol;Acc:HGNC:14088]                                                      |
| SCLY     | selenocysteine lyase [Source:HGNC Symbol;Acc:HGNC:18161]                                                                     |
| ATP5G3   | ATP synthase, H <sup>+</sup> transporting, mitochondrial Fo complex subunit C3 (subunit 9) [Source:HGNC Symbol;Acc:HGNC:843] |
| EDC4     | enhancer of mRNA decapping 4 [Source:HGNC Symbol;Acc:HGNC:17157]                                                             |
| EXOSC1   | exosome component 1 [Source:HGNC Symbol;Acc:HGNC:17286]                                                                      |
| KANSL3   | KAT8 regulatory NSL complex subunit 3 [Source:HGNC Symbol;Acc:HGNC:25473]                                                    |
| MAK16    | MAK16 homolog [Source:HGNC Symbol;Acc:HGNC:13703]                                                                            |
| RSBN1L   | round spermatid basic protein 1 like [Source:HGNC Symbol;Acc:HGNC:24765]                                                     |

|         |                                                                                                          |
|---------|----------------------------------------------------------------------------------------------------------|
| TGM5    | transglutaminase 5 [Source:HGNC Symbol;Acc:HGNC:11781]                                                   |
| C1orf54 | chromosome 1 open reading frame 54 [Source:HGNC Symbol;Acc:HGNC:26258]                                   |
| CDK14   | cyclin dependent kinase 14 [Source:HGNC Symbol;Acc:HGNC:8883]                                            |
| CHPF2   | chondroitin polymerizing factor 2 [Source:HGNC Symbol;Acc:HGNC:29270]                                    |
| EFNA5   | ephrin A5 [Source:HGNC Symbol;Acc:HGNC:3225]                                                             |
| FBXO15  | F-box protein 15 [Source:HGNC Symbol;Acc:HGNC:13617]                                                     |
| FBXW7   | F-box and WD repeat domain containing 7 [Source:HGNC Symbol;Acc:HGNC:16712]                              |
| LY9     | lymphocyte antigen 9 [Source:HGNC Symbol;Acc:HGNC:6730]                                                  |
| MED26   | mediator complex subunit 26 [Source:HGNC Symbol;Acc:HGNC:2376]                                           |
| NSRP1   | nuclear speckle splicing regulatory protein 1 [Source:HGNC Symbol;Acc:HGNC:25305]                        |
| PEX2    | peroxisomal biogenesis factor 2 [Source:HGNC Symbol;Acc:HGNC:9717]                                       |
| PLXND1  | plexin D1 [Source:HGNC Symbol;Acc:HGNC:9107]                                                             |
| PRRG4   | proline rich and Gla domain 4 [Source:HGNC Symbol;Acc:HGNC:30799]                                        |
| S100A14 | S100 calcium binding protein A14 [Source:HGNC Symbol;Acc:HGNC:18901]                                     |
| SORD    | sorbitol dehydrogenase [Source:HGNC Symbol;Acc:HGNC:11184]                                               |
| TEX15   | testis expressed 15 [Source:HGNC Symbol;Acc:HGNC:11738]                                                  |
| TTC19   | tetratricopeptide repeat domain 19 [Source:HGNC Symbol;Acc:HGNC:26006]                                   |
| AMY1A   | amylase, alpha 1A (salivary) [Source:HGNC Symbol;Acc:HGNC:474]                                           |
| ANKRD10 | ankyrin repeat domain 10 [Source:HGNC Symbol;Acc:HGNC:20265]                                             |
| CD22    | CD22 molecule [Source:HGNC Symbol;Acc:HGNC:1643]                                                         |
| DHDDS   | dehydrodolichyl diphosphate synthase subunit [Source:HGNC Symbol;Acc:HGNC:20603]                         |
| EP400   | E1A binding protein p400 [Source:HGNC Symbol;Acc:HGNC:11958]                                             |
| HEY2    | hes related family bHLH transcription factor with YRPW motif 2 [Source:HGNC Symbol;Acc:HGNC:4881]        |
| HOXA7   | homeobox A7 [Source:HGNC Symbol;Acc:HGNC:5108]                                                           |
| INTS6L  | integrator complex subunit 6 like [Source:HGNC Symbol;Acc:HGNC:27334]                                    |
| JAG2    | jagged 2 [Source:HGNC Symbol;Acc:HGNC:6189]                                                              |
| PLAC1   | placenta specific 1 [Source:HGNC Symbol;Acc:HGNC:9044]                                                   |
| SLC13A1 | solute carrier family 13 member 1 [Source:HGNC Symbol;Acc:HGNC:10916]                                    |
| SLC23A3 | solute carrier family 23 member 3 [Source:HGNC Symbol;Acc:HGNC:20601]                                    |
| SLC27A6 | solute carrier family 27 member 6 [Source:HGNC Symbol;Acc:HGNC:11000]                                    |
| YIPF6   | Yip1 domain family member 6 [Source:HGNC Symbol;Acc:HGNC:28304]                                          |
| ZNHIT2  | zinc finger HIT-type containing 2 [Source:HGNC Symbol;Acc:HGNC:1177]                                     |
| AHSA2   | AHA1, activator of heat shock 90kDa protein ATPase homolog 2 (yeast) [Source:HGNC Symbol;Acc:HGNC:20437] |
| ATPAF2  | ATP synthase mitochondrial F1 complex assembly factor 2 [Source:HGNC Symbol;Acc:HGNC:18802]              |
| CDH12   | cadherin 12 [Source:HGNC Symbol;Acc:HGNC:1751]                                                           |
| GEMIN7  | gem nuclear organelle associated protein 7 [Source:HGNC Symbol;Acc:HGNC:20045]                           |
| HM13    | histocompatibility (minor) 13 [Source:HGNC Symbol;Acc:HGNC:16435]                                        |
| LYRM4   | LYR motif containing 4 [Source:HGNC Symbol;Acc:HGNC:21365]                                               |

|          |                                                                                                                |
|----------|----------------------------------------------------------------------------------------------------------------|
| NT5C3A   | 5'-nucleotidase, cytosolic IIIA [Source:HGNC Symbol;Acc:HGNC:17820]                                            |
| REG3A    | regenerating family member 3 alpha [Source:HGNC Symbol;Acc:HGNC:8601]                                          |
| RPS19BP1 | ribosomal protein S19 binding protein 1 [Source:HGNC Symbol;Acc:HGNC:28749]                                    |
| TPRG1L   | tumor protein p63 regulated 1-like [Source:HGNC Symbol;Acc:HGNC:27007]                                         |
| CLIC3    | chloride intracellular channel 3 [Source:HGNC Symbol;Acc:HGNC:2064]                                            |
| CSF3R    | colony stimulating factor 3 receptor [Source:HGNC Symbol;Acc:HGNC:2439]                                        |
| GPRC5B   | G protein-coupled receptor class C group 5 member B [Source:HGNC Symbol;Acc:HGNC:13308]                        |
| IMPA1    | inositol monophosphatase 1 [Source:HGNC Symbol;Acc:HGNC:6050]                                                  |
| IRX3     | iroquois homeobox 3 [Source:HGNC Symbol;Acc:HGNC:14360]                                                        |
| KRT13    | keratin 13 [Source:HGNC Symbol;Acc:HGNC:6415]                                                                  |
| NFATC4   | nuclear factor of activated T-cells 4 [Source:HGNC Symbol;Acc:HGNC:7778]                                       |
| PCOLCE2  | procollagen C-endopeptidase enhancer 2 [Source:HGNC Symbol;Acc:HGNC:8739]                                      |
| SAMD9L   | sterile alpha motif domain containing 9 like [Source:HGNC Symbol;Acc:HGNC:1349]                                |
| SVEP1    | sushi, von Willebrand factor type A, EGF and pentraxin domain containing 1 [Source:HGNC Symbol;Acc:HGNC:15985] |
| TRIM14   | tripartite motif containing 14 [Source:HGNC Symbol;Acc:HGNC:16283]                                             |
| TSPAN13  | tetraspanin 13 [Source:HGNC Symbol;Acc:HGNC:21643]                                                             |
| UPF3B    | UPF3 regulator of nonsense transcripts homolog B (yeast) [Source:HGNC Symbol;Acc:HGNC:20439]                   |
| C1orf115 | chromosome 1 open reading frame 115 [Source:HGNC Symbol;Acc:HGNC:25873]                                        |
| C4orf46  | chromosome 4 open reading frame 46 [Source:HGNC Symbol;Acc:HGNC:27320]                                         |
| NKX2-5   | NK2 homeobox 5 [Source:HGNC Symbol;Acc:HGNC:2488]                                                              |
| SMN2     | survival of motor neuron 2, centromeric [Source:HGNC Symbol;Acc:HGNC:11118]                                    |
| TACO1    | translational activator of cytochrome c oxidase I [Source:HGNC Symbol;Acc:HGNC:24316]                          |
| ZNF84    | zinc finger protein 84 [Source:HGNC Symbol;Acc:HGNC:13159]                                                     |
| ZSWIM8   | zinc finger SWIM-type containing 8 [Source:HGNC Symbol;Acc:HGNC:23528]                                         |
| ATF7     | activating transcription factor 7 [Source:HGNC Symbol;Acc:HGNC:792]                                            |
| ELP3     | elongator acetyltransferase complex subunit 3 [Source:HGNC Symbol;Acc:HGNC:20696]                              |
| GNPTG    | N-acetylglucosamine-1-phosphate transferase gamma subunit [Source:HGNC Symbol;Acc:HGNC:23026]                  |
| GPR4     | G protein-coupled receptor 4 [Source:HGNC Symbol;Acc:HGNC:4497]                                                |
| IFT46    | intraflagellar transport 46 [Source:HGNC Symbol;Acc:HGNC:26146]                                                |
| MINK1    | misshapen like kinase 1 [Source:HGNC Symbol;Acc:HGNC:17565]                                                    |
| REV1     | REV1, DNA directed polymerase [Source:HGNC Symbol;Acc:HGNC:14060]                                              |
| RIPK4    | receptor interacting serine/threonine kinase 4 [Source:HGNC Symbol;Acc:HGNC:496]                               |
| RNF8     | ring finger protein 8 [Source:HGNC Symbol;Acc:HGNC:10071]                                                      |
| SATB2    | SATB homeobox 2 [Source:HGNC Symbol;Acc:HGNC:21637]                                                            |
| SLC26A10 | solute carrier family 26 member 10 [Source:HGNC Symbol;Acc:HGNC:14470]                                         |
| SLC45A1  | solute carrier family 45 member 1 [Source:HGNC Symbol;Acc:HGNC:17939]                                          |
| TAOK1    | TAO kinase 1 [Source:HGNC Symbol;Acc:HGNC:29259]                                                               |

|          |                                                                                                      |
|----------|------------------------------------------------------------------------------------------------------|
| TIMM17A  | translocase of inner mitochondrial membrane 17 homolog A (yeast) [Source:HGNC Symbol;Acc:HGNC:17315] |
| TLE3     | transducin like enhancer of split 3 [Source:HGNC Symbol;Acc:HGNC:11839]                              |
| VAMP7    | vesicle associated membrane protein 7 [Source:HGNC Symbol;Acc:HGNC:11486]                            |
| ZNF296   | zinc finger protein 296 [Source:HGNC Symbol;Acc:HGNC:15981]                                          |
| ARHGAP30 | Rho GTPase activating protein 30 [Source:HGNC Symbol;Acc:HGNC:27414]                                 |
| CPOX     | coproporphyrinogen oxidase [Source:HGNC Symbol;Acc:HGNC:2321]                                        |
| DPYSL4   | dihydropyrimidinase like 4 [Source:HGNC Symbol;Acc:HGNC:3016]                                        |
| EPPK1    | epiplakin 1 [Source:HGNC Symbol;Acc:HGNC:15577]                                                      |
| EVI2A    | ecotropic viral integration site 2A [Source:HGNC Symbol;Acc:HGNC:3499]                               |
| FBF1     | Fas binding factor 1 [Source:HGNC Symbol;Acc:HGNC:24674]                                             |
| FGF6     | fibroblast growth factor 6 [Source:HGNC Symbol;Acc:HGNC:3684]                                        |
| GABRA1   | gamma-aminobutyric acid type A receptor alpha1 subunit [Source:HGNC Symbol;Acc:HGNC:4075]            |
| GNRH2    | gonadotropin releasing hormone 2 [Source:HGNC Symbol;Acc:HGNC:4420]                                  |
| GPR155   | G protein-coupled receptor 155 [Source:HGNC Symbol;Acc:HGNC:22951]                                   |
| IL37     | interleukin 37 [Source:HGNC Symbol;Acc:HGNC:15563]                                                   |
| KANK1    | KN motif and ankyrin repeat domains 1 [Source:HGNC Symbol;Acc:HGNC:19309]                            |
| MAP7     | microtubule associated protein 7 [Source:HGNC Symbol;Acc:HGNC:6869]                                  |
| MCC      | mutated in colorectal cancers [Source:HGNC Symbol;Acc:HGNC:6935]                                     |
| PIGH     | phosphatidylinositol glycan anchor biosynthesis class H [Source:HGNC Symbol;Acc:HGNC:8964]           |
| RBM47    | RNA binding motif protein 47 [Source:HGNC Symbol;Acc:HGNC:30358]                                     |
| STXBP6   | syntaxin binding protein 6 [Source:HGNC Symbol;Acc:HGNC:19666]                                       |
| SYPL2    | synaptophysin like 2 [Source:HGNC Symbol;Acc:HGNC:27638]                                             |
| UBE2D4   | ubiquitin conjugating enzyme E2 D4 (putative) [Source:HGNC Symbol;Acc:HGNC:21647]                    |
| CAPSL    | calcyphosine like [Source:HGNC Symbol;Acc:HGNC:28375]                                                |
| CERS1    | ceramide synthase 1 [Source:HGNC Symbol;Acc:HGNC:14253]                                              |
| CFAP36   | cilia and flagella associated protein 36 [Source:HGNC Symbol;Acc:HGNC:30540]                         |
| DDX55    | DEAD-box helicase 55 [Source:HGNC Symbol;Acc:HGNC:20085]                                             |
| IFT43    | intraflagellar transport 43 [Source:HGNC Symbol;Acc:HGNC:29669]                                      |
| PNPLA5   | patatin like phospholipase domain containing 5 [Source:HGNC Symbol;Acc:HGNC:24888]                   |
| RSPRY1   | ring finger and SPRY domain containing 1 [Source:HGNC Symbol;Acc:HGNC:29420]                         |
| SLC25A40 | solute carrier family 25 member 40 [Source:HGNC Symbol;Acc:HGNC:29680]                               |
| TBCCD1   | TBCC domain containing 1 [Source:HGNC Symbol;Acc:HGNC:25546]                                         |
| TMEM26   | transmembrane protein 26 [Source:HGNC Symbol;Acc:HGNC:28550]                                         |
| ZNF507   | zinc finger protein 507 [Source:HGNC Symbol;Acc:HGNC:23783]                                          |
| AMPD1    | adenosine monophosphate deaminase 1 [Source:HGNC Symbol;Acc:HGNC:468]                                |
| ARMC1    | armadillo repeat containing 1 [Source:HGNC Symbol;Acc:HGNC:17684]                                    |
| ATAT1    | alpha tubulin acetyltransferase 1 [Source:HGNC Symbol;Acc:HGNC:21186]                                |

|         |                                                                                                     |
|---------|-----------------------------------------------------------------------------------------------------|
| ATOH8   | atonal bHLH transcription factor 8 [Source:HGNC Symbol;Acc:HGNC:24126]                              |
| CHRA1   | chromatin accessibility complex 1 [Source:HGNC Symbol;Acc:HGNC:13544]                               |
| CNIH3   | cornichon family AMPA receptor auxiliary protein 3 [Source:HGNC Symbol;Acc:HGNC:26802]              |
| COG7    | component of oligomeric golgi complex 7 [Source:HGNC Symbol;Acc:HGNC:18622]                         |
| COL4A6  | collagen type IV alpha 6 chain [Source:HGNC Symbol;Acc:HGNC:2208]                                   |
| CYP4F11 | cytochrome P450 family 4 subfamily F member 11 [Source:HGNC Symbol;Acc:HGNC:13265]                  |
| KANK4   | KN motif and ankyrin repeat domains 4 [Source:HGNC Symbol;Acc:HGNC:27263]                           |
| KCNJ3   | potassium voltage-gated channel subfamily J member 3 [Source:HGNC Symbol;Acc:HGNC:6264]             |
| LRRC47  | leucine rich repeat containing 47 [Source:HGNC Symbol;Acc:HGNC:29207]                               |
| LSR     | lipolysis stimulated lipoprotein receptor [Source:HGNC Symbol;Acc:HGNC:29572]                       |
| MECOM   | MDS1 and EVI1 complex locus [Source:HGNC Symbol;Acc:HGNC:3498]                                      |
| NAV1    | neuron navigator 1 [Source:HGNC Symbol;Acc:HGNC:15989]                                              |
| PIP     | prolactin induced protein [Source:HGNC Symbol;Acc:HGNC:8993]                                        |
| RNF183  | ring finger protein 183 [Source:HGNC Symbol;Acc:HGNC:28721]                                         |
| SGSH    | N-sulfoglucosamine sulfohydrolase [Source:HGNC Symbol;Acc:HGNC:10818]                               |
| SLC35F1 | solute carrier family 35 member F1 [Source:HGNC Symbol;Acc:HGNC:21483]                              |
| USF1    | upstream transcription factor 1 [Source:HGNC Symbol;Acc:HGNC:12593]                                 |
| VSTM2L  | V-set and transmembrane domain containing 2 like [Source:HGNC Symbol;Acc:HGNC:16096]                |
| ZMYND19 | zinc finger MYND-type containing 19 [Source:HGNC Symbol;Acc:HGNC:21146]                             |
| CPM     | carboxypeptidase M [Source:HGNC Symbol;Acc:HGNC:2311]                                               |
| FZD6    | frizzled class receptor 6 [Source:HGNC Symbol;Acc:HGNC:4044]                                        |
| KRT4    | keratin 4 [Source:HGNC Symbol;Acc:HGNC:6441]                                                        |
| MAN2A1  | mannosidase alpha class 2A member 1 [Source:HGNC Symbol;Acc:HGNC:6824]                              |
| PPP1R1A | protein phosphatase 1 regulatory inhibitor subunit 1A [Source:HGNC Symbol;Acc:HGNC:9286]            |
| PROX1   | prospero homeobox 1 [Source:HGNC Symbol;Acc:HGNC:9459]                                              |
| SPINT2  | serine peptidase inhibitor, Kunitz type, 2 [Source:HGNC Symbol;Acc:HGNC:11247]                      |
| AGR3    | anterior gradient 3, protein disulphide isomerase family member [Source:HGNC Symbol;Acc:HGNC:24167] |
| DDX49   | DEAD-box helicase 49 [Source:HGNC Symbol;Acc:HGNC:18684]                                            |
| DEFB4A  | defensin beta 4A [Source:HGNC Symbol;Acc:HGNC:2767]                                                 |
| GTF3C3  | general transcription factor IIIC subunit 3 [Source:HGNC Symbol;Acc:HGNC:4666]                      |
| IL20    | interleukin 20 [Source:HGNC Symbol;Acc:HGNC:6002]                                                   |
| KCNH8   | potassium voltage-gated channel subfamily H member 8 [Source:HGNC Symbol;Acc:HGNC:18864]            |
| POLDIP3 | polymerase (DNA) delta interacting protein 3 [Source:HGNC Symbol;Acc:HGNC:23782]                    |
| POLR2J  | polymerase (RNA) II subunit J [Source:HGNC Symbol;Acc:HGNC:9197]                                    |
| RAET1E  | retinoic acid early transcript 1E [Source:HGNC Symbol;Acc:HGNC:16793]                               |

|          |                                                                                              |
|----------|----------------------------------------------------------------------------------------------|
| RIBC2    | RIB43A domain with coiled-coils 2 [Source:HGNC Symbol;Acc:HGNC:13241]                        |
| SDR39U1  | short chain dehydrogenase/reductase family 39U member 1 [Source:HGNC Symbol;Acc:HGNC:20275]  |
| TRAPPC5  | trafficking protein particle complex 5 [Source:HGNC Symbol;Acc:HGNC:23067]                   |
| UGT2B11  | UDP glucuronosyltransferase family 2 member B11 [Source:HGNC Symbol;Acc:HGNC:12545]          |
| UNC119B  | unc-119 lipid binding chaperone B [Source:HGNC Symbol;Acc:HGNC:16488]                        |
| ACSS1    | acyl-CoA synthetase short-chain family member 1 [Source:HGNC Symbol;Acc:HGNC:16091]          |
| ATP2C2   | ATPase secretory pathway Ca <sup>2+</sup> transporting 2 [Source:HGNC Symbol;Acc:HGNC:29103] |
| B4GALNT4 | beta-1,4-N-acetyl-galactosaminyltransferase 4 [Source:HGNC Symbol;Acc:HGNC:26315]            |
| CALML3   | calmodulin like 3 [Source:HGNC Symbol;Acc:HGNC:1452]                                         |
| COL16A1  | collagen type XVI alpha 1 chain [Source:HGNC Symbol;Acc:HGNC:2193]                           |
| CPNE8    | copine 8 [Source:HGNC Symbol;Acc:HGNC:23498]                                                 |
| CYB561D2 | cytochrome b561 family member D2 [Source:HGNC Symbol;Acc:HGNC:30253]                         |
| DHX35    | DEAH-box helicase 35 [Source:HGNC Symbol;Acc:HGNC:15861]                                     |
| DNALI1   | dynein axonemal light intermediate chain 1 [Source:HGNC Symbol;Acc:HGNC:14353]               |
| EID2     | EP300 interacting inhibitor of differentiation 2 [Source:HGNC Symbol;Acc:HGNC:28292]         |
| FCF1     | FCF1 rRNA-processing protein [Source:HGNC Symbol;Acc:HGNC:20220]                             |
| FLI1     | Fli-1 proto-oncogene, ETS transcription factor [Source:HGNC Symbol;Acc:HGNC:3749]            |
| FSTL4    | follistatin like 4 [Source:HGNC Symbol;Acc:HGNC:21389]                                       |
| GPKOW    | G-patch domain and KOW motifs [Source:HGNC Symbol;Acc:HGNC:30677]                            |
| GTPBP3   | GTP binding protein 3 (mitochondrial) [Source:HGNC Symbol;Acc:HGNC:14880]                    |
| HBA2     | hemoglobin subunit alpha 2 [Source:HGNC Symbol;Acc:HGNC:4824]                                |
| HGH1     | HGH1 homolog [Source:HGNC Symbol;Acc:HGNC:24161]                                             |
| IPO8     | importin 8 [Source:HGNC Symbol;Acc:HGNC:9853]                                                |
| JAML     | junction adhesion molecule like [Source:HGNC Symbol;Acc:HGNC:19084]                          |
| KNOP1    | lysine rich nucleolar protein 1 [Source:HGNC Symbol;Acc:HGNC:34404]                          |
| LRRC32   | leucine rich repeat containing 32 [Source:HGNC Symbol;Acc:HGNC:4161]                         |
| MAB21L3  | mab-21 like 3 [Source:HGNC Symbol;Acc:HGNC:26787]                                            |
| MARCO    | macrophage receptor with collagenous structure [Source:HGNC Symbol;Acc:HGNC:6895]            |
| MEX3D    | mex-3 RNA binding family member D [Source:HGNC Symbol;Acc:HGNC:16734]                        |
| MPL      | MPL proto-oncogene, thrombopoietin receptor [Source:HGNC Symbol;Acc:HGNC:7217]               |
| PADI2    | peptidyl arginine deiminase 2 [Source:HGNC Symbol;Acc:HGNC:18341]                            |
| PDCD2L   | programmed cell death 2-like [Source:HGNC Symbol;Acc:HGNC:28194]                             |
| PDIA2    | protein disulfide isomerase family A member 2 [Source:HGNC Symbol;Acc:HGNC:14180]            |
| PGBD5    | piggyBac transposable element derived 5 [Source:HGNC Symbol;Acc:HGNC:19405]                  |

|          |                                                                                                                  |
|----------|------------------------------------------------------------------------------------------------------------------|
| PHAX     | phosphorylated adaptor for RNA export [Source:HGNC Symbol;Acc:HGNC:10241]                                        |
| PIK3C2A  | phosphatidylinositol-4-phosphate 3-kinase catalytic subunit type 2 alpha [Source:HGNC Symbol;Acc:HGNC:8971]      |
| SH3PXD2A | SH3 and PX domains 2A [Source:HGNC Symbol;Acc:HGNC:23664]                                                        |
| SHISA2   | shisa family member 2 [Source:HGNC Symbol;Acc:HGNC:20366]                                                        |
| SMCR8    | Smith-Magenis syndrome chromosome region, candidate 8 [Source:HGNC Symbol;Acc:HGNC:17921]                        |
| SRPX     | sushi repeat containing protein, X-linked [Source:HGNC Symbol;Acc:HGNC:11309]                                    |
| TIMM50   | translocase of inner mitochondrial membrane 50 [Source:HGNC Symbol;Acc:HGNC:23656]                               |
| YTHDF3   | YTH N6-methyladenosine RNA binding protein 3 [Source:HGNC Symbol;Acc:HGNC:26465]                                 |
| ZSCAN26  | zinc finger and SCAN domain containing 26 [Source:HGNC Symbol;Acc:HGNC:12978]                                    |
| ATG13    | autophagy related 13 [Source:HGNC Symbol;Acc:HGNC:29091]                                                         |
| CCNYL1   | cyclin Y like 1 [Source:HGNC Symbol;Acc:HGNC:26868]                                                              |
| CSN2     | casein beta [Source:HGNC Symbol;Acc:HGNC:2447]                                                                   |
| DDX4     | DEAD-box helicase 4 [Source:HGNC Symbol;Acc:HGNC:18700]                                                          |
| FAN1     | FANCD2/FANCI-associated nuclease 1 [Source:HGNC Symbol;Acc:HGNC:29170]                                           |
| FLRT2    | fibronectin leucine rich transmembrane protein 2 [Source:HGNC Symbol;Acc:HGNC:3761]                              |
| KIF1C    | kinesin family member 1C [Source:HGNC Symbol;Acc:HGNC:6317]                                                      |
| MAFA     | MAF bZIP transcription factor A [Source:HGNC Symbol;Acc:HGNC:23145]                                              |
| MRAS     | muscle RAS oncogene homolog [Source:HGNC Symbol;Acc:HGNC:7227]                                                   |
| PPP1R9A  | protein phosphatase 1 regulatory subunit 9A [Source:HGNC Symbol;Acc:HGNC:14946]                                  |
| RHOB     | ras homolog family member B [Source:HGNC Symbol;Acc:HGNC:668]                                                    |
| SLITRK6  | SLIT and NTRK like family member 6 [Source:HGNC Symbol;Acc:HGNC:23503]                                           |
| TRUB2    | TruB pseudouridine synthase family member 2 [Source:HGNC Symbol;Acc:HGNC:17170]                                  |
| ZBTB17   | zinc finger and BTB domain containing 17 [Source:HGNC Symbol;Acc:HGNC:12936]                                     |
| ATP5O    | ATP synthase, H <sup>+</sup> transporting, mitochondrial F1 complex, O subunit [Source:HGNC Symbol;Acc:HGNC:850] |
| COMMD7   | COMM domain containing 7 [Source:HGNC Symbol;Acc:HGNC:16223]                                                     |
| EMC2     | ER membrane protein complex subunit 2 [Source:HGNC Symbol;Acc:HGNC:28963]                                        |
| FLT3LG   | fms related tyrosine kinase 3 ligand [Source:HGNC Symbol;Acc:HGNC:3766]                                          |
| HS1BP3   | HCLS1 binding protein 3 [Source:HGNC Symbol;Acc:HGNC:24979]                                                      |
| NOM1     | nucleolar protein with MIF4G domain 1 [Source:HGNC Symbol;Acc:HGNC:13244]                                        |
| PSMG3    | proteasome assembly chaperone 3 [Source:HGNC Symbol;Acc:HGNC:22420]                                              |
| SYAP1    | synapse associated protein 1 [Source:HGNC Symbol;Acc:HGNC:16273]                                                 |
| ABLIM3   | actin binding LIM protein family member 3 [Source:HGNC Symbol;Acc:HGNC:29132]                                    |
| BRIP1    | BRCA1 interacting protein C-terminal helicase 1 [Source:HGNC Symbol;Acc:HGNC:20473]                              |
| CAMK1D   | calcium/calmodulin dependent protein kinase ID [Source:HGNC Symbol;Acc:HGNC:19341]                               |

|          |                                                                                                            |
|----------|------------------------------------------------------------------------------------------------------------|
| CD52     | CD52 molecule [Source:HGNC Symbol;Acc:HGNC:1804]                                                           |
| DZIP1    | DAZ interacting zinc finger protein 1 [Source:HGNC Symbol;Acc:HGNC:20908]                                  |
| FRMD4A   | FERM domain containing 4A [Source:HGNC Symbol;Acc:HGNC:25491]                                              |
| GALNT14  | polypeptide N-acetylgalactosaminyltransferase 14 [Source:HGNC Symbol;Acc:HGNC:22946]                       |
| GPR107   | G protein-coupled receptor 107 [Source:HGNC Symbol;Acc:HGNC:17830]                                         |
| GPR27    | G protein-coupled receptor 27 [Source:HGNC Symbol;Acc:HGNC:4482]                                           |
| GPX5     | glutathione peroxidase 5 [Source:HGNC Symbol;Acc:HGNC:4557]                                                |
| GRTP1    | growth hormone regulated TBC protein 1 [Source:HGNC Symbol;Acc:HGNC:20310]                                 |
| HOXC9    | homeobox C9 [Source:HGNC Symbol;Acc:HGNC:5130]                                                             |
| HOXD10   | homeobox D10 [Source:HGNC Symbol;Acc:HGNC:5133]                                                            |
| INTS10   | integrator complex subunit 10 [Source:HGNC Symbol;Acc:HGNC:25548]                                          |
| LY6G6C   | lymphocyte antigen 6 complex, locus G6C [Source:HGNC Symbol;Acc:HGNC:13936]                                |
| LZTR1    | leucine-zipper-like transcription regulator 1 [Source:HGNC Symbol;Acc:HGNC:6742]                           |
| MAPK12   | mitogen-activated protein kinase 12 [Source:HGNC Symbol;Acc:HGNC:6874]                                     |
| MYBPC2   | myosin binding protein C, fast type [Source:HGNC Symbol;Acc:HGNC:7550]                                     |
| NEK3     | NIMA related kinase 3 [Source:HGNC Symbol;Acc:HGNC:7746]                                                   |
| NEMF     | nuclear export mediator factor [Source:HGNC Symbol;Acc:HGNC:10663]                                         |
| PATJ     | PATJ, crumbs cell polarity complex component [Source:HGNC Symbol;Acc:HGNC:28881]                           |
| PHOSPHO2 | phosphatase, orphan 2 [Source:HGNC Symbol;Acc:HGNC:28316]                                                  |
| PMF1     | polyamine-modulated factor 1 [Source:HGNC Symbol;Acc:HGNC:9112]                                            |
| RELT     | RELT tumor necrosis factor receptor [Source:HGNC Symbol;Acc:HGNC:13764]                                    |
| SLC46A3  | solute carrier family 46 member 3 [Source:HGNC Symbol;Acc:HGNC:27501]                                      |
| TAF1D    | TATA-box binding protein associated factor, RNA polymerase I subunit D [Source:HGNC Symbol;Acc:HGNC:28759] |
| TCF20    | transcription factor 20 (AR1) [Source:HGNC Symbol;Acc:HGNC:11631]                                          |
| DARS     | aspartyl-tRNA synthetase [Source:HGNC Symbol;Acc:HGNC:2678]                                                |
| FAM72A   | family with sequence similarity 72 member A [Source:HGNC Symbol;Acc:HGNC:24044]                            |
| FOXE1    | forkhead box E1 [Source:HGNC Symbol;Acc:HGNC:3806]                                                         |
| HBG2     | hemoglobin subunit gamma 2 [Source:HGNC Symbol;Acc:HGNC:4832]                                              |
| LCLAT1   | lysocardiolipin acyltransferase 1 [Source:HGNC Symbol;Acc:HGNC:26756]                                      |
| C12orf10 | chromosome 12 open reading frame 10 [Source:HGNC Symbol;Acc:HGNC:17590]                                    |
| PLPPR2   | phospholipid phosphatase related 2 [Source:HGNC Symbol;Acc:HGNC:29566]                                     |
| VCPKMT   | valosin containing protein lysine methyltransferase [Source:HGNC Symbol;Acc:HGNC:20352]                    |
| CCNG2    | cyclin G2 [Source:HGNC Symbol;Acc:HGNC:1593]                                                               |
| CH25H    | cholesterol 25-hydroxylase [Source:HGNC Symbol;Acc:HGNC:1907]                                              |
| CXXC5    | CXXC finger protein 5 [Source:HGNC Symbol;Acc:HGNC:26943]                                                  |
| CYB5R4   | cytochrome b5 reductase 4 [Source:HGNC Symbol;Acc:HGNC:20147]                                              |
| EIF1B    | eukaryotic translation initiation factor 1B [Source:HGNC Symbol;Acc:HGNC:30792]                            |



|          |                                                                                                        |
|----------|--------------------------------------------------------------------------------------------------------|
| ETV1     | ETS variant 1 [Source:HGNC Symbol;Acc:HGNC:3490]                                                       |
| GALK1    | galactokinase 1 [Source:HGNC Symbol;Acc:HGNC:4118]                                                     |
| GTF3C6   | general transcription factor IIIC subunit 6 [Source:HGNC Symbol;Acc:HGNC:20872]                        |
| HAUS6    | HAUS augmin like complex subunit 6 [Source:HGNC Symbol;Acc:HGNC:25948]                                 |
| HPS6     | HPS6, biogenesis of lysosomal organelles complex 2 subunit 3 [Source:HGNC Symbol;Acc:HGNC:18817]       |
| INPP5J   | inositol polyphosphate-5-phosphatase J [Source:HGNC Symbol;Acc:HGNC:8956]                              |
| KRT2     | keratin 2 [Source:HGNC Symbol;Acc:HGNC:6439]                                                           |
| LAMA4    | laminin subunit alpha 4 [Source:HGNC Symbol;Acc:HGNC:6484]                                             |
| LAMTOR5  | late endosomal/lysosomal adaptor, MAPK and MTOR activator 5 [Source:HGNC Symbol;Acc:HGNC:17955]        |
| MICU3    | mitochondrial calcium uptake family member 3 [Source:HGNC Symbol;Acc:HGNC:27820]                       |
| MOCOS    | molybdenum cofactor sulfurase [Source:HGNC Symbol;Acc:HGNC:18234]                                      |
| MXD4     | MAX dimerization protein 4 [Source:HGNC Symbol;Acc:HGNC:13906]                                         |
| NAA20    | N(alpha)-acetyltransferase 20, NatB catalytic subunit [Source:HGNC Symbol;Acc:HGNC:15908]              |
| NOSIP    | nitric oxide synthase interacting protein [Source:HGNC Symbol;Acc:HGNC:17946]                          |
| RESP18   | regulated endocrine specific protein 18 [Source:HGNC Symbol;Acc:HGNC:33762]                            |
| RNF187   | ring finger protein 187 [Source:HGNC Symbol;Acc:HGNC:27146]                                            |
| SHPRH    | SNF2 histone linker PHD RING helicase [Source:HGNC Symbol;Acc:HGNC:19336]                              |
| SNAI3    | snail family transcriptional repressor 3 [Source:HGNC Symbol;Acc:HGNC:18411]                           |
| SNRNP35  | small nuclear ribonucleoprotein U11/U12 subunit 35 [Source:HGNC Symbol;Acc:HGNC:30852]                 |
| SYT1     | synaptotagmin 1 [Source:HGNC Symbol;Acc:HGNC:11509]                                                    |
| TAF12    | TATA-box binding protein associated factor 12 [Source:HGNC Symbol;Acc:HGNC:11545]                      |
| TMEM132A | transmembrane protein 132A [Source:HGNC Symbol;Acc:HGNC:31092]                                         |
| TRIM24   | tripartite motif containing 24 [Source:HGNC Symbol;Acc:HGNC:11812]                                     |
| ZNF165   | zinc finger protein 165 [Source:HGNC Symbol;Acc:HGNC:12953]                                            |
| ADAM19   | ADAM metallopeptidase domain 19 [Source:HGNC Symbol;Acc:HGNC:197]                                      |
| C1D      | C1D nuclear receptor corepressor [Source:HGNC Symbol;Acc:HGNC:29911]                                   |
| CNTN4    | contactin 4 [Source:HGNC Symbol;Acc:HGNC:2174]                                                         |
| COQ6     | coenzyme Q6, monooxygenase [Source:HGNC Symbol;Acc:HGNC:20233]                                         |
| CYHR1    | cysteine and histidine rich 1 [Source:HGNC Symbol;Acc:HGNC:17806]                                      |
| DCBLD2   | discoidin, CUB and LCCL domain containing 2 [Source:HGNC Symbol;Acc:HGNC:24627]                        |
| FBXO6    | F-box protein 6 [Source:HGNC Symbol;Acc:HGNC:13585]                                                    |
| HNRNPA0  | heterogeneous nuclear ribonucleoprotein A0 [Source:HGNC Symbol;Acc:HGNC:5030]                          |
| KYAT1    | kynurenine aminotransferase 1 [Source:HGNC Symbol;Acc:HGNC:1564]                                       |
| LSM2     | LSM2 homolog, U6 small nuclear RNA and mRNA degradation associated [Source:HGNC Symbol;Acc:HGNC:13940] |
| MATN2    | matrilin 2 [Source:HGNC Symbol;Acc:HGNC:6908]                                                          |
| MMP8     | matrix metallopeptidase 8 [Source:HGNC Symbol;Acc:HGNC:7175]                                           |

|         |                                                                                                             |
|---------|-------------------------------------------------------------------------------------------------------------|
| PFN2    | profilin 2 [Source:HGNC Symbol;Acc:HGNC:8882]                                                               |
| PLD6    | phospholipase D family member 6 [Source:HGNC Symbol;Acc:HGNC:30447]                                         |
| RBP2    | retinol binding protein 2 [Source:HGNC Symbol;Acc:HGNC:9920]                                                |
| SCRIB   | scribbled planar cell polarity protein [Source:HGNC Symbol;Acc:HGNC:30377]                                  |
| SH2B2   | SH2B adaptor protein 2 [Source:HGNC Symbol;Acc:HGNC:17381]                                                  |
| SIX5    | SIX homeobox 5 [Source:HGNC Symbol;Acc:HGNC:10891]                                                          |
| SLC38A7 | solute carrier family 38 member 7 [Source:HGNC Symbol;Acc:HGNC:25582]                                       |
| SLC7A8  | solute carrier family 7 member 8 [Source:HGNC Symbol;Acc:HGNC:11066]                                        |
| ST3GAL6 | ST3 beta-galactoside alpha-2,3-sialyltransferase 6 [Source:HGNC Symbol;Acc:HGNC:18080]                      |
| TFCP2   | transcription factor CP2 [Source:HGNC Symbol;Acc:HGNC:11748]                                                |
| TRIB2   | tribbles pseudokinase 2 [Source:HGNC Symbol;Acc:HGNC:30809]                                                 |
| TRPM4   | transient receptor potential cation channel subfamily M member 4 [Source:HGNC Symbol;Acc:HGNC:17993]        |
| UBE2R2  | ubiquitin conjugating enzyme E2 R2 [Source:HGNC Symbol;Acc:HGNC:19907]                                      |
| UCK1    | uridine-cytidine kinase 1 [Source:HGNC Symbol;Acc:HGNC:14859]                                               |
| ZDHHC9  | zinc finger DHHC-type containing 9 [Source:HGNC Symbol;Acc:HGNC:18475]                                      |
| BRF1    | BRF1, RNA polymerase III transcription initiation factor 90 kDa subunit [Source:HGNC Symbol;Acc:HGNC:11551] |
| EN1     | engrailed homeobox 1 [Source:HGNC Symbol;Acc:HGNC:3342]                                                     |
| FAM161B | family with sequence similarity 161 member B [Source:HGNC Symbol;Acc:HGNC:19854]                            |
| IL19    | interleukin 19 [Source:HGNC Symbol;Acc:HGNC:5990]                                                           |
| POLR2K  | polymerase (RNA) II subunit K [Source:HGNC Symbol;Acc:HGNC:9198]                                            |
| RPRD1B  | regulation of nuclear pre-mRNA domain containing 1B [Source:HGNC Symbol;Acc:HGNC:16209]                     |
| SF3B6   | splicing factor 3b subunit 6 [Source:HGNC Symbol;Acc:HGNC:30096]                                            |
| SFR1    | SWI5 dependent homologous recombination repair protein 1 [Source:HGNC Symbol;Acc:HGNC:29574]                |
| ASPHD2  | aspartate beta-hydroxylase domain containing 2 [Source:HGNC Symbol;Acc:HGNC:30437]                          |
| BMI1    | BMI1 proto-oncogene, polycomb ring finger [Source:HGNC Symbol;Acc:HGNC:1066]                                |
| CAPN15  | calpain 15 [Source:HGNC Symbol;Acc:HGNC:11182]                                                              |
| COX10   | COX10 heme A:farnesyltransferase cytochrome c oxidase assembly factor [Source:HGNC Symbol;Acc:HGNC:2260]    |
| CSF2RB  | colony stimulating factor 2 receptor beta common subunit [Source:HGNC Symbol;Acc:HGNC:2436]                 |
| CXCL16  | C-X-C motif chemokine ligand 16 [Source:HGNC Symbol;Acc:HGNC:16642]                                         |
| DSCAML1 | DS cell adhesion molecule like 1 [Source:HGNC Symbol;Acc:HGNC:14656]                                        |
| EMP3    | epithelial membrane protein 3 [Source:HGNC Symbol;Acc:HGNC:3335]                                            |
| FCRLA   | Fc receptor like A [Source:HGNC Symbol;Acc:HGNC:18504]                                                      |
| FEZ1    | fasciculation and elongation protein zeta 1 [Source:HGNC Symbol;Acc:HGNC:3659]                              |
| GPR161  | G protein-coupled receptor 161 [Source:HGNC Symbol;Acc:HGNC:23694]                                          |

|          |                                                                                                  |
|----------|--------------------------------------------------------------------------------------------------|
| GRB14    | growth factor receptor bound protein 14 [Source:HGNC Symbol;Acc:HGNC:4565]                       |
| HARS     | histidyl-tRNA synthetase [Source:HGNC Symbol;Acc:HGNC:4816]                                      |
| PCSK1N   | proprotein convertase subtilisin/kexin type 1 inhibitor [Source:HGNC Symbol;Acc:HGNC:17301]      |
| PRR7     | proline rich 7 (synaptic) [Source:HGNC Symbol;Acc:HGNC:28130]                                    |
| PSMB2    | proteasome subunit beta 2 [Source:HGNC Symbol;Acc:HGNC:9539]                                     |
| RAB3B    | RAB3B, member RAS oncogene family [Source:HGNC Symbol;Acc:HGNC:9778]                             |
| RNASE6   | ribonuclease A family member k6 [Source:HGNC Symbol;Acc:HGNC:10048]                              |
| RNLS     | renalase, FAD dependent amine oxidase [Source:HGNC Symbol;Acc:HGNC:25641]                        |
| RUFY1    | RUN and FYVE domain containing 1 [Source:HGNC Symbol;Acc:HGNC:19760]                             |
| SERPINI1 | serpin family I member 1 [Source:HGNC Symbol;Acc:HGNC:8943]                                      |
| SLC39A9  | solute carrier family 39 member 9 [Source:HGNC Symbol;Acc:HGNC:20182]                            |
| TMEM79   | transmembrane protein 79 [Source:HGNC Symbol;Acc:HGNC:28196]                                     |
| TSSC4    | tumor suppressing subtransferable candidate 4 [Source:HGNC Symbol;Acc:HGNC:12386]                |
| TTC36    | tetratricopeptide repeat domain 36 [Source:HGNC Symbol;Acc:HGNC:33708]                           |
| UBA6     | ubiquitin like modifier activating enzyme 6 [Source:HGNC Symbol;Acc:HGNC:25581]                  |
| VIT      | vitrin [Source:HGNC Symbol;Acc:HGNC:12697]                                                       |
| WDSUB1   | WD repeat, sterile alpha motif and U-box domain containing 1 [Source:HGNC Symbol;Acc:HGNC:26697] |
| ZNF207   | zinc finger protein 207 [Source:HGNC Symbol;Acc:HGNC:12998]                                      |
| ZNF503   | zinc finger protein 503 [Source:HGNC Symbol;Acc:HGNC:23589]                                      |
| C1orf116 | chromosome 1 open reading frame 116 [Source:HGNC Symbol;Acc:HGNC:28667]                          |
| CCDC14   | coiled-coil domain containing 14 [Source:HGNC Symbol;Acc:HGNC:25766]                             |
| CMC2     | C-X9-C motif containing 2 [Source:HGNC Symbol;Acc:HGNC:24447]                                    |
| COMMD8   | COMM domain containing 8 [Source:HGNC Symbol;Acc:HGNC:26036]                                     |
| DBR1     | debranching RNA lariats 1 [Source:HGNC Symbol;Acc:HGNC:15594]                                    |
| DNAAF5   | dynein (axonemal) assembly factor 5 [Source:HGNC Symbol;Acc:HGNC:26013]                          |
| E4F1     | E4F transcription factor 1 [Source:HGNC Symbol;Acc:HGNC:3121]                                    |
| IFT22    | intraflagellar transport 22 [Source:HGNC Symbol;Acc:HGNC:21895]                                  |
| KLRG2    | killer cell lectin like receptor G2 [Source:HGNC Symbol;Acc:HGNC:24778]                          |
| LYRM9    | LYR motif containing 9 [Source:HGNC Symbol;Acc:HGNC:27314]                                       |
| MRPS15   | mitochondrial ribosomal protein S15 [Source:HGNC Symbol;Acc:HGNC:14504]                          |
| RDH13    | retinol dehydrogenase 13 (all-trans/9-cis) [Source:HGNC Symbol;Acc:HGNC:19978]                   |
| RNF185   | ring finger protein 185 [Source:HGNC Symbol;Acc:HGNC:26783]                                      |
| UBE4A    | ubiquitination factor E4A [Source:HGNC Symbol;Acc:HGNC:12499]                                    |
| USE1     | unconventional SNARE in the ER 1 [Source:HGNC Symbol;Acc:HGNC:30882]                             |
| XAB2     | XPA binding protein 2 [Source:HGNC Symbol;Acc:HGNC:14089]                                        |
| ZDHC7    | zinc finger DHHC-type containing 7 [Source:HGNC Symbol;Acc:HGNC:18459]                           |
| ZNF148   | zinc finger protein 148 [Source:HGNC Symbol;Acc:HGNC:12933]                                      |
| EMB      | embigin [Source:HGNC Symbol;Acc:HGNC:30465]                                                      |

|           |                                                                                                              |
|-----------|--------------------------------------------------------------------------------------------------------------|
| GCNT2     | glucosaminyl (N-acetyl) transferase 2, I-branching enzyme (I blood group) [Source:HGNC Symbol;Acc:HGNC:4204] |
| GNG11     | G protein subunit gamma 11 [Source:HGNC Symbol;Acc:HGNC:4403]                                                |
| KCNK1     | potassium two pore domain channel subfamily K member 1 [Source:HGNC Symbol;Acc:HGNC:6272]                    |
| LAMP3     | lysosomal associated membrane protein 3 [Source:HGNC Symbol;Acc:HGNC:14582]                                  |
| PTGIS     | prostaglandin I2 (prostacyclin) synthase [Source:HGNC Symbol;Acc:HGNC:9603]                                  |
| ST14      | suppression of tumorigenicity 14 [Source:HGNC Symbol;Acc:HGNC:11344]                                         |
| STEAP1    | six transmembrane epithelial antigen of the prostate 1 [Source:HGNC Symbol;Acc:HGNC:11378]                   |
| SYNJ2     | synaptojanin 2 [Source:HGNC Symbol;Acc:HGNC:11504]                                                           |
| TACSTD2   | tumor-associated calcium signal transducer 2 [Source:HGNC Symbol;Acc:HGNC:11530]                             |
| AR        | androgen receptor [Source:HGNC Symbol;Acc:HGNC:644]                                                          |
| ATP9B     | ATPase phospholipid transporting 9B (putative) [Source:HGNC Symbol;Acc:HGNC:13541]                           |
| C1orf112  | chromosome 1 open reading frame 112 [Source:HGNC Symbol;Acc:HGNC:25565]                                      |
| CCDC137   | coiled-coil domain containing 137 [Source:HGNC Symbol;Acc:HGNC:33451]                                        |
| CLTC      | clathrin heavy chain [Source:HGNC Symbol;Acc:HGNC:2092]                                                      |
| HNRNPUL2  | heterogeneous nuclear ribonucleoprotein U-like 2 [Source:HGNC Symbol;Acc:HGNC:25451]                         |
| INTS4     | integrator complex subunit 4 [Source:HGNC Symbol;Acc:HGNC:25048]                                             |
| KRI1      | KRI1 homolog [Source:HGNC Symbol;Acc:HGNC:25769]                                                             |
| MAD2L1BP  | MAD2L1 binding protein [Source:HGNC Symbol;Acc:HGNC:21059]                                                   |
| MTX1      | metaxin 1 [Source:HGNC Symbol;Acc:HGNC:7504]                                                                 |
| SLC25A19  | solute carrier family 25 member 19 [Source:HGNC Symbol;Acc:HGNC:14409]                                       |
| NOL12     | nucleolar protein 12 [Source:HGNC Symbol;Acc:HGNC:28585]                                                     |
| NYNRIN    | NYN domain and retroviral integrase containing [Source:HGNC Symbol;Acc:HGNC:20165]                           |
| PAF1      | PAF1 homolog, Paf1/RNA polymerase II complex component [Source:HGNC Symbol;Acc:HGNC:25459]                   |
| PSMD10    | proteasome 26S subunit, non-ATPase 10 [Source:HGNC Symbol;Acc:HGNC:9555]                                     |
| SEC14L3   | SEC14 like lipid binding 3 [Source:HGNC Symbol;Acc:HGNC:18655]                                               |
| TNFAIP8L2 | TNF alpha induced protein 8 like 2 [Source:HGNC Symbol;Acc:HGNC:26277]                                       |
| UBE2QL1   | ubiquitin conjugating enzyme E2 Q family like 1 [Source:HGNC Symbol;Acc:HGNC:37269]                          |
| VPS25     | vacuolar protein sorting 25 homolog [Source:HGNC Symbol;Acc:HGNC:28122]                                      |
| AAMP      | angio associated migratory cell protein [Source:HGNC Symbol;Acc:HGNC:18]                                     |
| ADAP1     | ArfGAP with dual PH domains 1 [Source:HGNC Symbol;Acc:HGNC:16486]                                            |
| FEM1B     | fem-1 homolog B [Source:HGNC Symbol;Acc:HGNC:3649]                                                           |
| FLNC      | filamin C [Source:HGNC Symbol;Acc:HGNC:3756]                                                                 |
| LZTS2     | leucine zipper, putative tumor suppressor 2 [Source:HGNC Symbol;Acc:HGNC:29381]                              |
| MAL2      | mal, T-cell differentiation protein 2 (gene/pseudogene) [Source:HGNC Symbol;Acc:HGNC:13634]                  |

|         |                                                                                                                     |
|---------|---------------------------------------------------------------------------------------------------------------------|
| MLH3    | mutL homolog 3 [Source:HGNC Symbol;Acc:HGNC:7128]                                                                   |
| NEK6    | NIMA related kinase 6 [Source:HGNC Symbol;Acc:HGNC:7749]                                                            |
| POLR2L  | polymerase (RNA) II subunit L [Source:HGNC Symbol;Acc:HGNC:9199]                                                    |
| PYGB    | phosphorylase, glycogen; brain [Source:HGNC Symbol;Acc:HGNC:9723]                                                   |
| SH3TC2  | SH3 domain and tetratricopeptide repeats 2 [Source:HGNC Symbol;Acc:HGNC:29427]                                      |
| SSBP4   | single stranded DNA binding protein 4 [Source:HGNC Symbol;Acc:HGNC:15676]                                           |
| UBE2D1  | ubiquitin conjugating enzyme E2 D1 [Source:HGNC Symbol;Acc:HGNC:12474]                                              |
| ACAD8   | acyl-CoA dehydrogenase family member 8 [Source:HGNC Symbol;Acc:HGNC:87]                                             |
| B4GALT7 | beta-1,4-galactosyltransferase 7 [Source:HGNC Symbol;Acc:HGNC:930]                                                  |
| CASKIN1 | CASK interacting protein 1 [Source:HGNC Symbol;Acc:HGNC:20879]                                                      |
| CEP83   | centrosomal protein 83 [Source:HGNC Symbol;Acc:HGNC:17966]                                                          |
| CFAP20  | cilia and flagella associated protein 20 [Source:HGNC Symbol;Acc:HGNC:29523]                                        |
| COL22A1 | collagen type XXII alpha 1 [Source:HGNC Symbol;Acc:HGNC:22989]                                                      |
| CXADR   | coxsackie virus and adenovirus receptor [Source:HGNC Symbol;Acc:HGNC:2559]                                          |
| FSCN1   | fascin actin-bundling protein 1 [Source:HGNC Symbol;Acc:HGNC:11148]                                                 |
| HIRA    | histone cell cycle regulator [Source:HGNC Symbol;Acc:HGNC:4916]                                                     |
| MESP1   | mesoderm posterior bHLH transcription factor 1 [Source:HGNC Symbol;Acc:HGNC:29658]                                  |
| MRPS14  | mitochondrial ribosomal protein S14 [Source:HGNC Symbol;Acc:HGNC:14049]                                             |
| GBAS    | glioblastoma amplified sequence [Source:HGNC Symbol;Acc:HGNC:4179]                                                  |
| PATZ1   | POZ/BTB and AT hook containing zinc finger 1 [Source:HGNC Symbol;Acc:HGNC:13071]                                    |
| PCNP    | PEST proteolytic signal containing nuclear protein [Source:HGNC Symbol;Acc:HGNC:30023]                              |
| PIGC    | phosphatidylinositol glycan anchor biosynthesis class C [Source:HGNC Symbol;Acc:HGNC:8960]                          |
| QKI     | QKI, KH domain containing, RNA binding [Source:HGNC Symbol;Acc:HGNC:21100]                                          |
| SAMHD1  | SAM and HD domain containing deoxynucleoside triphosphate triphosphohydrolase 1 [Source:HGNC Symbol;Acc:HGNC:15925] |
| SLC6A3  | solute carrier family 6 member 3 [Source:HGNC Symbol;Acc:HGNC:11049]                                                |
| TFAP2B  | transcription factor AP-2 beta [Source:HGNC Symbol;Acc:HGNC:11743]                                                  |
| VILL    | villin-like [Source:HGNC Symbol;Acc:HGNC:30906]                                                                     |
| WWOX    | WW domain containing oxidoreductase [Source:HGNC Symbol;Acc:HGNC:12799]                                             |
| CDX1    | caudal type homeobox 1 [Source:HGNC Symbol;Acc:HGNC:1805]                                                           |
| DNAJB14 | DnaJ heat shock protein family (Hsp40) member B14 [Source:HGNC Symbol;Acc:HGNC:25881]                               |
| EDARADD | EDAR-associated death domain [Source:HGNC Symbol;Acc:HGNC:14341]                                                    |
| IPO13   | importin 13 [Source:HGNC Symbol;Acc:HGNC:16853]                                                                     |
| MED28   | mediator complex subunit 28 [Source:HGNC Symbol;Acc:HGNC:24628]                                                     |
| MEMO1   | mediator of cell motility 1 [Source:HGNC Symbol;Acc:HGNC:14014]                                                     |
| MEP1A   | mepripin A subunit alpha [Source:HGNC Symbol;Acc:HGNC:7015]                                                         |
| MRPL27  | mitochondrial ribosomal protein L27 [Source:HGNC Symbol;Acc:HGNC:14483]                                             |
| MRPL36  | mitochondrial ribosomal protein L36 [Source:HGNC Symbol;Acc:HGNC:14490]                                             |

|          |                                                                                                        |
|----------|--------------------------------------------------------------------------------------------------------|
| NDUFAF3  | NADH:ubiquinone oxidoreductase complex assembly factor 3 [Source:HGNC Symbol;Acc:HGNC:29918]           |
| NECAP2   | NECAP endocytosis associated 2 [Source:HGNC Symbol;Acc:HGNC:25528]                                     |
| RCCD1    | RCC1 domain containing 1 [Source:HGNC Symbol;Acc:HGNC:30457]                                           |
| TGM3     | transglutaminase 3 [Source:HGNC Symbol;Acc:HGNC:11779]                                                 |
| TRABD    | TraB domain containing [Source:HGNC Symbol;Acc:HGNC:28805]                                             |
| TRAPPC3  | trafficking protein particle complex 3 [Source:HGNC Symbol;Acc:HGNC:19942]                             |
| ZKSCAN3  | zinc finger with KRAB and SCAN domains 3 [Source:HGNC Symbol;Acc:HGNC:13853]                           |
| ZNRF2    | zinc and ring finger 2, E3 ubiquitin protein ligase [Source:HGNC Symbol;Acc:HGNC:22316]                |
| CCL28    | C-C motif chemokine ligand 28 [Source:HGNC Symbol;Acc:HGNC:17700]                                      |
| CLMN     | calmin (calponin-like, transmembrane) [Source:HGNC Symbol;Acc:HGNC:19972]                              |
| COL23A1  | collagen type XXIII alpha 1 chain [Source:HGNC Symbol;Acc:HGNC:22990]                                  |
| DOK5     | docking protein 5 [Source:HGNC Symbol;Acc:HGNC:16173]                                                  |
| KRT6B    | keratin 6B [Source:HGNC Symbol;Acc:HGNC:6444]                                                          |
| MARS2    | methionyl-tRNA synthetase 2, mitochondrial [Source:HGNC Symbol;Acc:HGNC:25133]                         |
| OSBP     | oxysterol binding protein [Source:HGNC Symbol;Acc:HGNC:8503]                                           |
| SIGIRR   | single immunoglobulin and toll-interleukin 1 receptor (TIR) domain [Source:HGNC Symbol;Acc:HGNC:30575] |
| STAC2    | SH3 and cysteine rich domain 2 [Source:HGNC Symbol;Acc:HGNC:23990]                                     |
| SYNE2    | spectrin repeat containing nuclear envelope protein 2 [Source:HGNC Symbol;Acc:HGNC:17084]              |
| TRNP1    | TMF1-regulated nuclear protein 1 [Source:HGNC Symbol;Acc:HGNC:34348]                                   |
| TXNDC17  | thioredoxin domain containing 17 [Source:HGNC Symbol;Acc:HGNC:28218]                                   |
| UCN      | urocortin [Source:HGNC Symbol;Acc:HGNC:12516]                                                          |
| ACSM2A   | acyl-CoA synthetase medium-chain family member 2A [Source:HGNC Symbol;Acc:HGNC:32017]                  |
| ATP6V1G2 | ATPase H <sup>+</sup> transporting V1 subunit G2 [Source:HGNC Symbol;Acc:HGNC:862]                     |
| BIRC7    | baculoviral IAP repeat containing 7 [Source:HGNC Symbol;Acc:HGNC:13702]                                |
| C3orf52  | chromosome 3 open reading frame 52 [Source:HGNC Symbol;Acc:HGNC:26255]                                 |
| CERS2    | ceramide synthase 2 [Source:HGNC Symbol;Acc:HGNC:14076]                                                |
| DCAF4    | DDB1 and CUL4 associated factor 4 [Source:HGNC Symbol;Acc:HGNC:20229]                                  |
| DCLRE1B  | DNA cross-link repair 1B [Source:HGNC Symbol;Acc:HGNC:17641]                                           |
| DHX16    | DEAH-box helicase 16 [Source:HGNC Symbol;Acc:HGNC:2739]                                                |
| EXOSC10  | exosome component 10 [Source:HGNC Symbol;Acc:HGNC:9138]                                                |
| KLK2     | kallikrein related peptidase 2 [Source:HGNC Symbol;Acc:HGNC:6363]                                      |
| LSM8     | LSM8 homolog, U6 small nuclear RNA associated [Source:HGNC Symbol;Acc:HGNC:20471]                      |
| MNDA     | myeloid cell nuclear differentiation antigen [Source:HGNC Symbol;Acc:HGNC:7183]                        |
| MZT1     | mitotic spindle organizing protein 1 [Source:HGNC Symbol;Acc:HGNC:33830]                               |
| NEMP1    | nuclear envelope integral membrane protein 1 [Source:HGNC Symbol;Acc:HGNC:29001]                       |

|         |                                                                                          |
|---------|------------------------------------------------------------------------------------------|
| NTMT1   | N-terminal Xaa-Pro-Lys N-methyltransferase 1 [Source:HGNC Symbol;Acc:HGNC:23373]         |
| NVL     | nuclear VCP-like [Source:HGNC Symbol;Acc:HGNC:8070]                                      |
| RAB4B   | RAB4B, member RAS oncogene family [Source:HGNC Symbol;Acc:HGNC:9782]                     |
| RNPC3   | RNA binding region (RNP1, RRM) containing 3 [Source:HGNC Symbol;Acc:HGNC:18666]          |
| SMU1    | DNA replication regulator and spliceosomal factor [Source:HGNC Symbol;Acc:HGNC:18247]    |
| SNRNP48 | small nuclear ribonucleoprotein U11/U12 subunit 48 [Source:HGNC Symbol;Acc:HGNC:21368]   |
| SPRYD4  | SPRY domain containing 4 [Source:HGNC Symbol;Acc:HGNC:27468]                             |
| TBCA    | tubulin folding cofactor A [Source:HGNC Symbol;Acc:HGNC:11579]                           |
| TM4SF5  | transmembrane 4 L six family member 5 [Source:HGNC Symbol;Acc:HGNC:11857]                |
| ZC3H14  | zinc finger CCCH-type containing 14 [Source:HGNC Symbol;Acc:HGNC:20509]                  |
| BHLHB9  | basic helix-loop-helix domain containing, class B, 9 [Source:HGNC Symbol;Acc:HGNC:29353] |
| FOXL2   | forkhead box L2 [Source:HGNC Symbol;Acc:HGNC:1092]                                       |
| IRX2    | iroquois homeobox 2 [Source:HGNC Symbol;Acc:HGNC:14359]                                  |
| KCNC1   | potassium voltage-gated channel subfamily C member 1 [Source:HGNC Symbol;Acc:HGNC:6233]  |
| LMO7    | LIM domain 7 [Source:HGNC Symbol;Acc:HGNC:6646]                                          |
| MYO1G   | myosin IG [Source:HGNC Symbol;Acc:HGNC:13880]                                            |
| NUP35   | nucleoporin 35 [Source:HGNC Symbol;Acc:HGNC:29797]                                       |
| PAX2    | paired box 2 [Source:HGNC Symbol;Acc:HGNC:8616]                                          |
| PCYOX1L | prenylcysteine oxidase 1 like [Source:HGNC Symbol;Acc:HGNC:28477]                        |
| RAD1    | RAD1 checkpoint DNA exonuclease [Source:HGNC Symbol;Acc:HGNC:9806]                       |
| RHOV    | ras homolog family member V [Source:HGNC Symbol;Acc:HGNC:18313]                          |
| SLC39A7 | solute carrier family 39 member 7 [Source:HGNC Symbol;Acc:HGNC:4927]                     |
| SLC9A8  | solute carrier family 9 member A8 [Source:HGNC Symbol;Acc:HGNC:20728]                    |
| SURF6   | surfeit 6 [Source:HGNC Symbol;Acc:HGNC:11478]                                            |
| UBR5    | ubiquitin protein ligase E3 component n-recognin 5 [Source:HGNC Symbol;Acc:HGNC:16806]   |
| USP39   | ubiquitin specific peptidase 39 [Source:HGNC Symbol;Acc:HGNC:20071]                      |
| VAT1    | vesicle amine transport 1 [Source:HGNC Symbol;Acc:HGNC:16919]                            |
| WAPL    | WAPL cohesin release factor [Source:HGNC Symbol;Acc:HGNC:23293]                          |
| ACOT8   | acyl-CoA thioesterase 8 [Source:HGNC Symbol;Acc:HGNC:15919]                              |
| ADGRF1  | adhesion G protein-coupled receptor F1 [Source:HGNC Symbol;Acc:HGNC:18990]               |
| B3GAT2  | beta-1,3-glucuronyltransferase 2 [Source:HGNC Symbol;Acc:HGNC:922]                       |
| DBNDD2  | dysbindin domain containing 2 [Source:HGNC Symbol;Acc:HGNC:15881]                        |
| EXOC2   | exocyst complex component 2 [Source:HGNC Symbol;Acc:HGNC:24968]                          |
| F11R    | F11 receptor [Source:HGNC Symbol;Acc:HGNC:14685]                                         |
| GNPDA2  | glucosamine-6-phosphate deaminase 2 [Source:HGNC Symbol;Acc:HGNC:21526]                  |
| HRK     | harakiri, BCL2 interacting protein [Source:HGNC Symbol;Acc:HGNC:5185]                    |

|          |                                                                                                               |
|----------|---------------------------------------------------------------------------------------------------------------|
| KMT5A    | lysine methyltransferase 5A [Source:HGNC Symbol;Acc:HGNC:29489]                                               |
| LSM10    | LSM10, U7 small nuclear RNA associated [Source:HGNC Symbol;Acc:HGNC:17562]                                    |
| MGAT3    | mannosyl (beta-1,4-)-glycoprotein beta-1,4-N-acetylglucosaminyltransferase [Source:HGNC Symbol;Acc:HGNC:7046] |
| MRPL23   | mitochondrial ribosomal protein L23 [Source:HGNC Symbol;Acc:HGNC:10322]                                       |
| NEDD8    | neural precursor cell expressed, developmentally down-regulated 8 [Source:HGNC Symbol;Acc:HGNC:7732]          |
| SORBS1   | sorbin and SH3 domain containing 1 [Source:HGNC Symbol;Acc:HGNC:14565]                                        |
| SULT1C2  | sulfotransferase family 1C member 2 [Source:HGNC Symbol;Acc:HGNC:11456]                                       |
| TBCB     | tubulin folding cofactor B [Source:HGNC Symbol;Acc:HGNC:1989]                                                 |
| UGT1A6   | UDP glucuronosyltransferase family 1 member A6 [Source:HGNC Symbol;Acc:HGNC:12538]                            |
| BCL2L12  | BCL2 like 12 [Source:HGNC Symbol;Acc:HGNC:13787]                                                              |
| COX4I2   | cytochrome c oxidase subunit 4I2 [Source:HGNC Symbol;Acc:HGNC:16232]                                          |
| DCLRE1A  | DNA cross-link repair 1A [Source:HGNC Symbol;Acc:HGNC:17660]                                                  |
| DCUN1D5  | defective in cullin neddylation 1 domain containing 5 [Source:HGNC Symbol;Acc:HGNC:28409]                     |
| MEAF6    | MYST/Esa1 associated factor 6 [Source:HGNC Symbol;Acc:HGNC:25674]                                             |
| MED29    | mediator complex subunit 29 [Source:HGNC Symbol;Acc:HGNC:23074]                                               |
| MTNR1B   | melatonin receptor 1B [Source:HGNC Symbol;Acc:HGNC:7464]                                                      |
| PYGO2    | pygopus family PHD finger 2 [Source:HGNC Symbol;Acc:HGNC:30257]                                               |
| RAB33B   | RAB33B, member RAS oncogene family [Source:HGNC Symbol;Acc:HGNC:16075]                                        |
| RGS13    | regulator of G-protein signaling 13 [Source:HGNC Symbol;Acc:HGNC:9995]                                        |
| RPRD2    | regulation of nuclear pre-mRNA domain containing 2 [Source:HGNC Symbol;Acc:HGNC:29039]                        |
| SBF1     | SET binding factor 1 [Source:HGNC Symbol;Acc:HGNC:10542]                                                      |
| SCAF1    | SR-related CTD associated factor 1 [Source:HGNC Symbol;Acc:HGNC:30403]                                        |
| STX4     | syntaxin 4 [Source:HGNC Symbol;Acc:HGNC:11439]                                                                |
| TMEM11   | transmembrane protein 11 [Source:HGNC Symbol;Acc:HGNC:16823]                                                  |
| TOMM22   | translocase of outer mitochondrial membrane 22 [Source:HGNC Symbol;Acc:HGNC:18002]                            |
| TTC9C    | tetratricopeptide repeat domain 9C [Source:HGNC Symbol;Acc:HGNC:28432]                                        |
| AKIRIN2  | akirin 2 [Source:HGNC Symbol;Acc:HGNC:21407]                                                                  |
| ARHGAP35 | Rho GTPase activating protein 35 [Source:HGNC Symbol;Acc:HGNC:4591]                                           |
| CASP14   | caspase 14 [Source:HGNC Symbol;Acc:HGNC:1502]                                                                 |
| CCL17    | C-C motif chemokine ligand 17 [Source:HGNC Symbol;Acc:HGNC:10615]                                             |
| CLCA2    | chloride channel accessory 2 [Source:HGNC Symbol;Acc:HGNC:2016]                                               |
| CLDN7    | claudin 7 [Source:HGNC Symbol;Acc:HGNC:2049]                                                                  |
| D2HGDH   | D-2-hydroxyglutarate dehydrogenase [Source:HGNC Symbol;Acc:HGNC:28358]                                        |
| DUSP13   | dual specificity phosphatase 13 [Source:HGNC Symbol;Acc:HGNC:19681]                                           |
| FOXQ1    | forkhead box Q1 [Source:HGNC Symbol;Acc:HGNC:20951]                                                           |
| GDA      | guanine deaminase [Source:HGNC Symbol;Acc:HGNC:4212]                                                          |
| NDN      | neccdin, MAGE family member [Source:HGNC Symbol;Acc:HGNC:7675]                                                |



|         |                                                                                                            |
|---------|------------------------------------------------------------------------------------------------------------|
| NPRL3   | NPR3 like, GATOR1 complex subunit [Source:HGNC Symbol;Acc:HGNC:14124]                                      |
| PGC     | progastricsin [Source:HGNC Symbol;Acc:HGNC:8890]                                                           |
| PIGQ    | phosphatidylinositol glycan anchor biosynthesis class Q [Source:HGNC Symbol;Acc:HGNC:14135]                |
| RNF39   | ring finger protein 39 [Source:HGNC Symbol;Acc:HGNC:18064]                                                 |
| SH3KBP1 | SH3 domain containing kinase binding protein 1 [Source:HGNC Symbol;Acc:HGNC:13867]                         |
| SLC15A4 | solute carrier family 15 member 4 [Source:HGNC Symbol;Acc:HGNC:23090]                                      |
| SLC5A2  | solute carrier family 5 member 2 [Source:HGNC Symbol;Acc:HGNC:11037]                                       |
| TREM1   | triggering receptor expressed on myeloid cells 1 [Source:HGNC Symbol;Acc:HGNC:17760]                       |
| ALG9    | ALG9, alpha-1,2-mannosyltransferase [Source:HGNC Symbol;Acc:HGNC:15672]                                    |
| ATP13A1 | ATPase 13A1 [Source:HGNC Symbol;Acc:HGNC:24215]                                                            |
| ATP5E   | ATP synthase, H+ transporting, mitochondrial F1 complex, epsilon subunit [Source:HGNC Symbol;Acc:HGNC:838] |
| CCDC12  | coiled-coil domain containing 12 [Source:HGNC Symbol;Acc:HGNC:28332]                                       |
| CCDC88B | coiled-coil domain containing 88B [Source:HGNC Symbol;Acc:HGNC:26757]                                      |
| DGUOK   | deoxyguanosine kinase [Source:HGNC Symbol;Acc:HGNC:2858]                                                   |
| DHX38   | DEAH-box helicase 38 [Source:HGNC Symbol;Acc:HGNC:17211]                                                   |
| LRR39   | leucine rich repeat containing 39 [Source:HGNC Symbol;Acc:HGNC:28228]                                      |
| MRPS11  | mitochondrial ribosomal protein S11 [Source:HGNC Symbol;Acc:HGNC:14050]                                    |
| NKX2-2  | NK2 homeobox 2 [Source:HGNC Symbol;Acc:HGNC:7835]                                                          |
| NKX6-1  | NK6 homeobox 1 [Source:HGNC Symbol;Acc:HGNC:7839]                                                          |
| PIGZ    | phosphatidylinositol glycan anchor biosynthesis class Z [Source:HGNC Symbol;Acc:HGNC:30596]                |
| PTCHD4  | patched domain containing 4 [Source:HGNC Symbol;Acc:HGNC:21345]                                            |
| SEC11A  | SEC11 homolog A, signal peptidase complex subunit [Source:HGNC Symbol;Acc:HGNC:17718]                      |
| SNX18   | sorting nexin 18 [Source:HGNC Symbol;Acc:HGNC:19245]                                                       |
| TBC1D7  | TBC1 domain family member 7 [Source:HGNC Symbol;Acc:HGNC:21066]                                            |
| ASCL2   | achaete-scute family bHLH transcription factor 2 [Source:HGNC Symbol;Acc:HGNC:739]                         |
| CADM3   | cell adhesion molecule 3 [Source:HGNC Symbol;Acc:HGNC:17601]                                               |
| CYP2A6  | cytochrome P450 family 2 subfamily A member 6 [Source:HGNC Symbol;Acc:HGNC:2610]                           |
| DAZL    | deleted in azoospermia like [Source:HGNC Symbol;Acc:HGNC:2685]                                             |
| DENND2C | DENN domain containing 2C [Source:HGNC Symbol;Acc:HGNC:24748]                                              |
| DIS3    | DIS3 homolog, exosome endoribonuclease and 3'-5' exoribonuclease [Source:HGNC Symbol;Acc:HGNC:20604]       |
| FAXDC2  | fatty acid hydroxylase domain containing 2 [Source:HGNC Symbol;Acc:HGNC:1334]                              |
| FRMD3   | FERM domain containing 3 [Source:HGNC Symbol;Acc:HGNC:24125]                                               |
| GLIPR1  | GLI pathogenesis related 1 [Source:HGNC Symbol;Acc:HGNC:17001]                                             |
| GRM8    | glutamate metabotropic receptor 8 [Source:HGNC Symbol;Acc:HGNC:4600]                                       |

|          |                                                                                                                            |
|----------|----------------------------------------------------------------------------------------------------------------------------|
| LSP1     | lymphocyte-specific protein 1 [Source:HGNC Symbol;Acc:HGNC:6707]                                                           |
| MED30    | mediator complex subunit 30 [Source:HGNC Symbol;Acc:HGNC:23032]                                                            |
| OSTF1    | osteoclast stimulating factor 1 [Source:HGNC Symbol;Acc:HGNC:8510]                                                         |
| RAB34    | RAB34, member RAS oncogene family [Source:HGNC Symbol;Acc:HGNC:16519]                                                      |
| RABGGTA  | Rab geranylgeranyltransferase alpha subunit [Source:HGNC Symbol;Acc:HGNC:9795]                                             |
| RARG     | retinoic acid receptor gamma [Source:HGNC Symbol;Acc:HGNC:9866]                                                            |
| RMDN1    | regulator of microtubule dynamics 1 [Source:HGNC Symbol;Acc:HGNC:24285]                                                    |
| RUNDC3B  | RUN domain containing 3B [Source:HGNC Symbol;Acc:HGNC:30286]                                                               |
| SCTR     | secretin receptor [Source:HGNC Symbol;Acc:HGNC:10608]                                                                      |
| ABCD4    | ATP binding cassette subfamily D member 4 [Source:HGNC Symbol;Acc:HGNC:68]                                                 |
| ATP5C1   | ATP synthase, H <sup>+</sup> transporting, mitochondrial F1 complex, gamma polypeptide 1 [Source:HGNC Symbol;Acc:HGNC:833] |
| CCR9     | C-C motif chemokine receptor 9 [Source:HGNC Symbol;Acc:HGNC:1610]                                                          |
| COL21A1  | collagen type XXI alpha 1 chain [Source:HGNC Symbol;Acc:HGNC:17025]                                                        |
| CPSF1    | cleavage and polyadenylation specific factor 1 [Source:HGNC Symbol;Acc:HGNC:2324]                                          |
| DCTN5    | dynactin subunit 5 [Source:HGNC Symbol;Acc:HGNC:24594]                                                                     |
| EDRF1    | erythroid differentiation regulatory factor 1 [Source:HGNC Symbol;Acc:HGNC:24640]                                          |
| ELP5     | elongator acetyltransferase complex subunit 5 [Source:HGNC Symbol;Acc:HGNC:30617]                                          |
| EMC8     | ER membrane protein complex subunit 8 [Source:HGNC Symbol;Acc:HGNC:7864]                                                   |
| FAM149B1 | family with sequence similarity 149 member B1 [Source:HGNC Symbol;Acc:HGNC:29162]                                          |
| FCER1A   | Fc fragment of IgE receptor 1a [Source:HGNC Symbol;Acc:HGNC:3609]                                                          |
| GLRX5    | glutaredoxin 5 [Source:HGNC Symbol;Acc:HGNC:20134]                                                                         |
| GPRIN1   | G protein regulated inducer of neurite outgrowth 1 [Source:HGNC Symbol;Acc:HGNC:24835]                                     |
| HCCS     | holocytochrome c synthase [Source:HGNC Symbol;Acc:HGNC:4837]                                                               |
| INTS2    | integrator complex subunit 2 [Source:HGNC Symbol;Acc:HGNC:29241]                                                           |
| INTS8    | integrator complex subunit 8 [Source:HGNC Symbol;Acc:HGNC:26048]                                                           |
| IRGM     | immunity-related GTPase M [Source:HGNC Symbol;Acc:HGNC:29597]                                                              |
| LMAN2    | lectin, mannose binding 2 [Source:HGNC Symbol;Acc:HGNC:16986]                                                              |
| LMF2     | lipase maturation factor 2 [Source:HGNC Symbol;Acc:HGNC:25096]                                                             |
| NIM1K    | NIM1 serine/threonine protein kinase [Source:HGNC Symbol;Acc:HGNC:28646]                                                   |
| RAB2B    | RAB2B, member RAS oncogene family [Source:HGNC Symbol;Acc:HGNC:20246]                                                      |
| SLC45A2  | solute carrier family 45 member 2 [Source:HGNC Symbol;Acc:HGNC:16472]                                                      |
| SNRPB2   | small nuclear ribonucleoprotein polypeptide B2 [Source:HGNC Symbol;Acc:HGNC:11155]                                         |
| SYNE4    | spectrin repeat containing nuclear envelope family member 4 [Source:HGNC Symbol;Acc:HGNC:26703]                            |
| TMEM40   | transmembrane protein 40 [Source:HGNC Symbol;Acc:HGNC:25620]                                                               |
| TOMM34   | translocase of outer mitochondrial membrane 34 [Source:HGNC Symbol;Acc:HGNC:15746]                                         |
| ANXA6    | annexin A6 [Source:HGNC Symbol;Acc:HGNC:544]                                                                               |

|          |                                                                                                                  |
|----------|------------------------------------------------------------------------------------------------------------------|
| DCAF6    | DDB1 and CUL4 associated factor 6 [Source:HGNC Symbol;Acc:HGNC:30002]                                            |
| EIF2B5   | eukaryotic translation initiation factor 2B subunit epsilon [Source:HGNC Symbol;Acc:HGNC:3261]                   |
| FKBP9    | FK506 binding protein 9 [Source:HGNC Symbol;Acc:HGNC:3725]                                                       |
| GREM1    | gremlin 1, DAN family BMP antagonist [Source:HGNC Symbol;Acc:HGNC:2001]                                          |
| HS3ST2   | heparan sulfate-glucosamine 3-sulfotransferase 2 [Source:HGNC Symbol;Acc:HGNC:5195]                              |
| IL1RAPL1 | interleukin 1 receptor accessory protein like 1 [Source:HGNC Symbol;Acc:HGNC:5996]                               |
| IMP3     | IMP3, U3 small nucleolar ribonucleoprotein [Source:HGNC Symbol;Acc:HGNC:14497]                                   |
| LDHC     | lactate dehydrogenase C [Source:HGNC Symbol;Acc:HGNC:6544]                                                       |
| LUZP1    | leucine zipper protein 1 [Source:HGNC Symbol;Acc:HGNC:14985]                                                     |
| MED20    | mediator complex subunit 20 [Source:HGNC Symbol;Acc:HGNC:16840]                                                  |
| MMP17    | matrix metalloproteinase 17 [Source:HGNC Symbol;Acc:HGNC:7163]                                                   |
| MTHFD2L  | methylenetetrahydrofolate dehydrogenase (NADP+ dependent) 2-like [Source:HGNC Symbol;Acc:HGNC:31865]             |
| NOTCH3   | notch 3 [Source:HGNC Symbol;Acc:HGNC:7883]                                                                       |
| PPIL4    | peptidylprolyl isomerase like 4 [Source:HGNC Symbol;Acc:HGNC:15702]                                              |
| SERPINA4 | serpin family A member 4 [Source:HGNC Symbol;Acc:HGNC:8948]                                                      |
| SLC5A12  | solute carrier family 5 member 12 [Source:HGNC Symbol;Acc:HGNC:28750]                                            |
| THEM4    | thioesterase superfamily member 4 [Source:HGNC Symbol;Acc:HGNC:17947]                                            |
| TSPYL4   | TSPY-like 4 [Source:HGNC Symbol;Acc:HGNC:21559]                                                                  |
| ATP5G1   | ATP synthase, H+ transporting, mitochondrial Fo complex subunit C1 (subunit 9) [Source:HGNC Symbol;Acc:HGNC:841] |
| CENPO    | centromere protein O [Source:HGNC Symbol;Acc:HGNC:28152]                                                         |
| COPS3    | COP9 signalosome subunit 3 [Source:HGNC Symbol;Acc:HGNC:2239]                                                    |
| EIF3L    | eukaryotic translation initiation factor 3 subunit L [Source:HGNC Symbol;Acc:HGNC:18138]                         |
| FOXRED1  | FAD dependent oxidoreductase domain containing 1 [Source:HGNC Symbol;Acc:HGNC:26927]                             |
| GALNT4   | polypeptide N-acetylgalactosaminyltransferase 4 [Source:HGNC Symbol;Acc:HGNC:4126]                               |
| GRAMD1A  | GRAM domain containing 1A [Source:HGNC Symbol;Acc:HGNC:29305]                                                    |
| INTS3    | integrator complex subunit 3 [Source:HGNC Symbol;Acc:HGNC:26153]                                                 |
| KATNAL1  | katanin catalytic subunit A1 like 1 [Source:HGNC Symbol;Acc:HGNC:28361]                                          |
| KCNK12   | potassium two pore domain channel subfamily K member 12 [Source:HGNC Symbol;Acc:HGNC:6274]                       |
| MED24    | mediator complex subunit 24 [Source:HGNC Symbol;Acc:HGNC:22963]                                                  |
| MGA      | MGA, MAX dimerization protein [Source:HGNC Symbol;Acc:HGNC:14010]                                                |
| MORF4L1  | mortality factor 4 like 1 [Source:HGNC Symbol;Acc:HGNC:16989]                                                    |
| MRPL11   | mitochondrial ribosomal protein L11 [Source:HGNC Symbol;Acc:HGNC:14042]                                          |
| NBEA     | neurobeachin [Source:HGNC Symbol;Acc:HGNC:7648]                                                                  |
| PBDC1    | polysaccharide biosynthesis domain containing 1 [Source:HGNC Symbol;Acc:HGNC:28790]                              |

|           |                                                                                             |
|-----------|---------------------------------------------------------------------------------------------|
| PIP4K2C   | phosphatidylinositol-5-phosphate 4-kinase type 2 gamma [Source:HGNC Symbol;Acc:HGNC:23786]  |
| PPP2R5D   | protein phosphatase 2 regulatory subunit B'delta [Source:HGNC Symbol;Acc:HGNC:9312]         |
| PQBP1     | polyglutamine binding protein 1 [Source:HGNC Symbol;Acc:HGNC:9330]                          |
| PROM2     | prominin 2 [Source:HGNC Symbol;Acc:HGNC:20685]                                              |
| TBX6      | T-box 6 [Source:HGNC Symbol;Acc:HGNC:11605]                                                 |
| TNFRSF10C | tumor necrosis factor receptor superfamily member 10c [Source:HGNC Symbol;Acc:HGNC:11906]   |
| TSN       | translin [Source:HGNC Symbol;Acc:HGNC:12379]                                                |
| ARHGAP23  | Rho GTPase activating protein 23 [Source:HGNC Symbol;Acc:HGNC:29293]                        |
| ATPAF1    | ATP synthase mitochondrial F1 complex assembly factor 1 [Source:HGNC Symbol;Acc:HGNC:18803] |
| BCAS1     | breast carcinoma amplified sequence 1 [Source:HGNC Symbol;Acc:HGNC:974]                     |
| CACNA1E   | calcium voltage-gated channel subunit alpha1 E [Source:HGNC Symbol;Acc:HGNC:1392]           |
| CIART     | circadian associated repressor of transcription [Source:HGNC Symbol;Acc:HGNC:25200]         |
| CORIN     | corin, serine peptidase [Source:HGNC Symbol;Acc:HGNC:19012]                                 |
| CYP4F3    | cytochrome P450 family 4 subfamily F member 3 [Source:HGNC Symbol;Acc:HGNC:2646]            |
| ERBIN     | erbb2 interacting protein [Source:HGNC Symbol;Acc:HGNC:15842]                               |
| EXOSC4    | exosome component 4 [Source:HGNC Symbol;Acc:HGNC:18189]                                     |
| FRMD8     | FERM domain containing 8 [Source:HGNC Symbol;Acc:HGNC:25462]                                |
| GABRA6    | gamma-aminobutyric acid type A receptor alpha6 subunit [Source:HGNC Symbol;Acc:HGNC:4080]   |
| METTL1    | methyltransferase like 1 [Source:HGNC Symbol;Acc:HGNC:7030]                                 |
| MT1B      | metallothionein 1B [Source:HGNC Symbol;Acc:HGNC:7394]                                       |
| MT4       | metallothionein 4 [Source:HGNC Symbol;Acc:HGNC:18705]                                       |
| MTSS1     | metastasis suppressor 1 [Source:HGNC Symbol;Acc:HGNC:20443]                                 |
| MYH4      | myosin, heavy chain 4, skeletal muscle [Source:HGNC Symbol;Acc:HGNC:7574]                   |
| NELFA     | negative elongation factor complex member A [Source:HGNC Symbol;Acc:HGNC:12768]             |
| NMNAT2    | nicotinamide nucleotide adenyltransferase 2 [Source:HGNC Symbol;Acc:HGNC:16789]             |
| PAX7      | paired box 7 [Source:HGNC Symbol;Acc:HGNC:8621]                                             |
| SLC19A3   | solute carrier family 19 member 3 [Source:HGNC Symbol;Acc:HGNC:16266]                       |
| SLC22A17  | solute carrier family 22 member 17 [Source:HGNC Symbol;Acc:HGNC:23095]                      |
| SLC25A32  | solute carrier family 25 member 32 [Source:HGNC Symbol;Acc:HGNC:29683]                      |
| SNX25     | sorting nexin 25 [Source:HGNC Symbol;Acc:HGNC:21883]                                        |
| SP110     | SP110 nuclear body protein [Source:HGNC Symbol;Acc:HGNC:5401]                               |
| SPRY4     | sprouty RTK signaling antagonist 4 [Source:HGNC Symbol;Acc:HGNC:15533]                      |
| UGT8      | UDP glycosyltransferase 8 [Source:HGNC Symbol;Acc:HGNC:12555]                               |
| USP16     | ubiquitin specific peptidase 16 [Source:HGNC Symbol;Acc:HGNC:12614]                         |

|         |                                                                                                            |
|---------|------------------------------------------------------------------------------------------------------------|
| VANGL2  | VANGL planar cell polarity protein 2 [Source:HGNC Symbol;Acc:HGNC:15511]                                   |
| VTCN1   | V-set domain containing T cell activation inhibitor 1 [Source:HGNC Symbol;Acc:HGNC:28873]                  |
| WSCD1   | WSC domain containing 1 [Source:HGNC Symbol;Acc:HGNC:29060]                                                |
| ALDH3B2 | aldehyde dehydrogenase 3 family member B2 [Source:HGNC Symbol;Acc:HGNC:411]                                |
| ALKBH2  | alkB homolog 2, alpha-ketoglutarate dependent dioxygenase [Source:HGNC Symbol;Acc:HGNC:32487]              |
| ANAPC16 | anaphase promoting complex subunit 16 [Source:HGNC Symbol;Acc:HGNC:26976]                                  |
| BCL2L15 | BCL2 like 15 [Source:HGNC Symbol;Acc:HGNC:33624]                                                           |
| CD72    | CD72 molecule [Source:HGNC Symbol;Acc:HGNC:1696]                                                           |
| COQ2    | coenzyme Q2, polyprenyltransferase [Source:HGNC Symbol;Acc:HGNC:25223]                                     |
| CTR9    | CTR9 homolog, Paf1/RNA polymerase II complex component [Source:HGNC Symbol;Acc:HGNC:16850]                 |
| DPM1    | dolichyl-phosphate mannosyltransferase polypeptide 1, catalytic subunit [Source:HGNC Symbol;Acc:HGNC:3005] |
| EXOSC7  | exosome component 7 [Source:HGNC Symbol;Acc:HGNC:28112]                                                    |
| FAM135A | family with sequence similarity 135 member A [Source:HGNC Symbol;Acc:HGNC:21084]                           |
| GDF1    | growth differentiation factor 1 [Source:HGNC Symbol;Acc:HGNC:4214]                                         |
| GGNBP2  | gametogenetin binding protein 2 [Source:HGNC Symbol;Acc:HGNC:19357]                                        |
| GPAA1   | glycosylphosphatidylinositol anchor attachment 1 [Source:HGNC Symbol;Acc:HGNC:4446]                        |
| HAUS8   | HAUS augmin like complex subunit 8 [Source:HGNC Symbol;Acc:HGNC:30532]                                     |
| KLRK1   | killer cell lectin like receptor K1 [Source:HGNC Symbol;Acc:HGNC:18788]                                    |
| LDAH    | lipid droplet associated hydrolase [Source:HGNC Symbol;Acc:HGNC:26145]                                     |
| MAGOHB  | mago homolog B, exon junction complex core component [Source:HGNC Symbol;Acc:HGNC:25504]                   |
| MRPL34  | mitochondrial ribosomal protein L34 [Source:HGNC Symbol;Acc:HGNC:14488]                                    |
| NOL11   | nucleolar protein 11 [Source:HGNC Symbol;Acc:HGNC:24557]                                                   |
| NUBP2   | nucleotide binding protein 2 [Source:HGNC Symbol;Acc:HGNC:8042]                                            |
| NUDCD2  | NudC domain containing 2 [Source:HGNC Symbol;Acc:HGNC:30535]                                               |
| NUDT16  | nudix hydrolase 16 [Source:HGNC Symbol;Acc:HGNC:26442]                                                     |
| PELP1   | proline, glutamate and leucine rich protein 1 [Source:HGNC Symbol;Acc:HGNC:30134]                          |
| PRPF4   | pre-mRNA processing factor 4 [Source:HGNC Symbol;Acc:HGNC:17349]                                           |
| PWP1    | PWP1 homolog, endonuclease [Source:HGNC Symbol;Acc:HGNC:17015]                                             |
| RHOT1   | ras homolog family member T1 [Source:HGNC Symbol;Acc:HGNC:21168]                                           |
| RRP1    | ribosomal RNA processing 1 [Source:HGNC Symbol;Acc:HGNC:18785]                                             |
| SMNDC1  | survival motor neuron domain containing 1 [Source:HGNC Symbol;Acc:HGNC:16900]                              |
| SSH1    | slingshot protein phosphatase 1 [Source:HGNC Symbol;Acc:HGNC:30579]                                        |
| SUSD1   | sushi domain containing 1 [Source:HGNC Symbol;Acc:HGNC:25413]                                              |
| TIMM8A  | translocase of inner mitochondrial membrane 8 homolog A (yeast) [Source:HGNC Symbol;Acc:HGNC:11817]        |

|          |                                                                                                       |
|----------|-------------------------------------------------------------------------------------------------------|
| TRPC5    | transient receptor potential cation channel subfamily C member 5 [Source:HGNC Symbol;Acc:HGNC:12337]  |
| TSPYL1   | TSPY-like 1 [Source:HGNC Symbol;Acc:HGNC:12382]                                                       |
| UTP11    | UTP11, small subunit processome component homolog (S. cerevisiae) [Source:HGNC Symbol;Acc:HGNC:24329] |
| A1BG     | alpha-1-B glycoprotein [Source:HGNC Symbol;Acc:HGNC:5]                                                |
| ADRA2B   | adrenoceptor alpha 2B [Source:HGNC Symbol;Acc:HGNC:282]                                               |
| AGRP     | agouti related neuropeptide [Source:HGNC Symbol;Acc:HGNC:330]                                         |
| ARHGAP19 | Rho GTPase activating protein 19 [Source:HGNC Symbol;Acc:HGNC:23724]                                  |
| COPS4    | COP9 signalosome subunit 4 [Source:HGNC Symbol;Acc:HGNC:16702]                                        |
| GAL3ST1  | galactose-3-O-sulfotransferase 1 [Source:HGNC Symbol;Acc:HGNC:24240]                                  |
| GFER     | growth factor, augments liver regeneration [Source:HGNC Symbol;Acc:HGNC:4236]                         |
| MAP4K5   | mitogen-activated protein kinase kinase kinase 5 [Source:HGNC Symbol;Acc:HGNC:6867]                   |
| NRCAM    | neuronal cell adhesion molecule [Source:HGNC Symbol;Acc:HGNC:7994]                                    |
| NTM      | neurotrimin [Source:HGNC Symbol;Acc:HGNC:17941]                                                       |
| RASAL1   | RAS protein activator like 1 [Source:HGNC Symbol;Acc:HGNC:9873]                                       |
| RXRB     | retinoid X receptor beta [Source:HGNC Symbol;Acc:HGNC:10478]                                          |
| S100A2   | S100 calcium binding protein A2 [Source:HGNC Symbol;Acc:HGNC:10492]                                   |
| SLC7A9   | solute carrier family 7 member 9 [Source:HGNC Symbol;Acc:HGNC:11067]                                  |
| STK26    | serine/threonine protein kinase 26 [Source:HGNC Symbol;Acc:HGNC:18174]                                |
| THEM6    | thioesterase superfamily member 6 [Source:HGNC Symbol;Acc:HGNC:29656]                                 |
| TMEM229B | transmembrane protein 229B [Source:HGNC Symbol;Acc:HGNC:20130]                                        |
| ARHGAP20 | Rho GTPase activating protein 20 [Source:HGNC Symbol;Acc:HGNC:18357]                                  |
| ATP2C1   | ATPase secretory pathway Ca <sup>2+</sup> transporting 1 [Source:HGNC Symbol;Acc:HGNC:13211]          |
| BANP     | BTG3 associated nuclear protein [Source:HGNC Symbol;Acc:HGNC:13450]                                   |
| BPHL     | biphenyl hydrolase-like (serine hydrolase) [Source:HGNC Symbol;Acc:HGNC:1094]                         |
| EXPH5    | exophilin 5 [Source:HGNC Symbol;Acc:HGNC:30578]                                                       |
| FBXL5    | F-box and leucine rich repeat protein 5 [Source:HGNC Symbol;Acc:HGNC:13602]                           |
| FOXF2    | forkhead box F2 [Source:HGNC Symbol;Acc:HGNC:3810]                                                    |
| GLDC     | glycine decarboxylase [Source:HGNC Symbol;Acc:HGNC:4313]                                              |
| IFI27    | interferon alpha inducible protein 27 [Source:HGNC Symbol;Acc:HGNC:5397]                              |
| MALL     | mal, T-cell differentiation protein like [Source:HGNC Symbol;Acc:HGNC:6818]                           |
| MRPL1    | mitochondrial ribosomal protein L1 [Source:HGNC Symbol;Acc:HGNC:14275]                                |
| PAQR4    | progesterone and adipoQ receptor family member 4 [Source:HGNC Symbol;Acc:HGNC:26386]                  |
| PLEKHH2  | pleckstrin homology, MyTH4 and FERM domain containing H2 [Source:HGNC Symbol;Acc:HGNC:30506]          |
| RAB3C    | RAB3C, member RAS oncogene family [Source:HGNC Symbol;Acc:HGNC:30269]                                 |
| UNC5B    | unc-5 netrin receptor B [Source:HGNC Symbol;Acc:HGNC:12568]                                           |
| UNC93B1  | unc-93 homolog B1 (C. elegans) [Source:HGNC Symbol;Acc:HGNC:13481]                                    |

|           |                                                                                                       |
|-----------|-------------------------------------------------------------------------------------------------------|
| VPS37B    | VPS37B, ESCRT-I subunit [Source:HGNC Symbol;Acc:HGNC:25754]                                           |
| ALG8      | ALG8, alpha-1,3-glucosyltransferase [Source:HGNC Symbol;Acc:HGNC:23161]                               |
| ARL2      | ADP ribosylation factor like GTPase 2 [Source:HGNC Symbol;Acc:HGNC:693]                               |
| ATP5L     | ATP synthase, H+ transporting, mitochondrial Fo complex subunit G [Source:HGNC Symbol;Acc:HGNC:14247] |
| CHODL     | chondrolectin [Source:HGNC Symbol;Acc:HGNC:17807]                                                     |
| KCTD20    | potassium channel tetramerization domain containing 20 [Source:HGNC Symbol;Acc:HGNC:21052]            |
| LRRC49    | leucine rich repeat containing 49 [Source:HGNC Symbol;Acc:HGNC:25965]                                 |
| MPHOSPH10 | M-phase phosphoprotein 10 [Source:HGNC Symbol;Acc:HGNC:7213]                                          |
| MRPL48    | mitochondrial ribosomal protein L48 [Source:HGNC Symbol;Acc:HGNC:16653]                               |
| MRPS17    | mitochondrial ribosomal protein S17 [Source:HGNC Symbol;Acc:HGNC:14047]                               |
| MRPS2     | mitochondrial ribosomal protein S2 [Source:HGNC Symbol;Acc:HGNC:14495]                                |
| PARN      | poly(A)-specific ribonuclease [Source:HGNC Symbol;Acc:HGNC:8609]                                      |
| PDCD7     | programmed cell death 7 [Source:HGNC Symbol;Acc:HGNC:8767]                                            |
| PIN4      | peptidylprolyl cis/trans isomerase, NIMA-interacting 4 [Source:HGNC Symbol;Acc:HGNC:8992]             |
| PPM1E     | protein phosphatase, Mg2+/Mn2+ dependent 1E [Source:HGNC Symbol;Acc:HGNC:19322]                       |
| PRPF6     | pre-mRNA processing factor 6 [Source:HGNC Symbol;Acc:HGNC:15860]                                      |
| SLC41A3   | solute carrier family 41 member 3 [Source:HGNC Symbol;Acc:HGNC:31046]                                 |
| SPSB3     | splA/ryanodine receptor domain and SOCS box containing 3 [Source:HGNC Symbol;Acc:HGNC:30629]          |
| SRP19     | signal recognition particle 19kDa [Source:HGNC Symbol;Acc:HGNC:11300]                                 |
| SSH2      | slingshot protein phosphatase 2 [Source:HGNC Symbol;Acc:HGNC:30580]                                   |
| TOMM70    | translocase of outer mitochondrial membrane 70 [Source:HGNC Symbol;Acc:HGNC:11985]                    |
| UPK1A     | uroplakin 1A [Source:HGNC Symbol;Acc:HGNC:12577]                                                      |
| ZNF703    | zinc finger protein 703 [Source:HGNC Symbol;Acc:HGNC:25883]                                           |
| ACTR2     | ARP2 actin-related protein 2 homolog (yeast) [Source:HGNC Symbol;Acc:HGNC:169]                        |
| ADH6      | alcohol dehydrogenase 6 (class V) [Source:HGNC Symbol;Acc:HGNC:255]                                   |
| ARHGAP17  | Rho GTPase activating protein 17 [Source:HGNC Symbol;Acc:HGNC:18239]                                  |
| ECHDC3    | enoyl-CoA hydratase domain containing 3 [Source:HGNC Symbol;Acc:HGNC:23489]                           |
| EGFL6     | EGF like domain multiple 6 [Source:HGNC Symbol;Acc:HGNC:3235]                                         |
| KISS1R    | KISS1 receptor [Source:HGNC Symbol;Acc:HGNC:4510]                                                     |
| LAMA5     | laminin subunit alpha 5 [Source:HGNC Symbol;Acc:HGNC:6485]                                            |
| LARGE1    | LARGE xylosyl- and glucuronyltransferase 1 [Source:HGNC Symbol;Acc:HGNC:6511]                         |
| NPDC1     | neural proliferation, differentiation and control, 1 [Source:HGNC Symbol;Acc:HGNC:7899]               |
| OAZ2      | ornithine decarboxylase antizyme 2 [Source:HGNC Symbol;Acc:HGNC:8096]                                 |
| PPP1R13L  | protein phosphatase 1 regulatory subunit 13 like [Source:HGNC Symbol;Acc:HGNC:18838]                  |
| PROCR     | protein C receptor [Source:HGNC Symbol;Acc:HGNC:9452]                                                 |

|           |                                                                                                       |
|-----------|-------------------------------------------------------------------------------------------------------|
| RASGEF1B  | RasGEF domain family member 1B [Source:HGNC Symbol;Acc:HGNC:24881]                                    |
| RPL18A    | ribosomal protein L18a [Source:HGNC Symbol;Acc:HGNC:10311]                                            |
| RTN4IP1   | reticulon 4 interacting protein 1 [Source:HGNC Symbol;Acc:HGNC:18647]                                 |
| VWA5A     | von Willebrand factor A domain containing 5A [Source:HGNC Symbol;Acc:HGNC:6658]                       |
| WDR46     | WD repeat domain 46 [Source:HGNC Symbol;Acc:HGNC:13923]                                               |
| BTF3L4    | basic transcription factor 3-like 4 [Source:HGNC Symbol;Acc:HGNC:30547]                               |
| CAPN9     | calpain 9 [Source:HGNC Symbol;Acc:HGNC:1486]                                                          |
| CSRNP2    | cysteine and serine rich nuclear protein 2 [Source:HGNC Symbol;Acc:HGNC:16006]                        |
| DDX54     | DEAD-box helicase 54 [Source:HGNC Symbol;Acc:HGNC:20084]                                              |
| FOXRED2   | FAD dependent oxidoreductase domain containing 2 [Source:HGNC Symbol;Acc:HGNC:26264]                  |
| MEDAG     | mesenteric estrogen dependent adipogenesis [Source:HGNC Symbol;Acc:HGNC:25926]                        |
| METTL18   | methyltransferase like 18 [Source:HGNC Symbol;Acc:HGNC:28793]                                         |
| MOS       | v-mos Moloney murine sarcoma viral oncogene homolog [Source:HGNC Symbol;Acc:HGNC:7199]                |
| MRE11A    | MRE11 homolog A, double strand break repair nuclease [Source:HGNC Symbol;Acc:HGNC:7230]               |
| MRPL22    | mitochondrial ribosomal protein L22 [Source:HGNC Symbol;Acc:HGNC:14480]                               |
| NINL      | ninein like [Source:HGNC Symbol;Acc:HGNC:29163]                                                       |
| NKAIN1    | Na <sup>+</sup> /K <sup>+</sup> transporting ATPase interacting 1 [Source:HGNC Symbol;Acc:HGNC:25743] |
| RBM28     | RNA binding motif protein 28 [Source:HGNC Symbol;Acc:HGNC:21863]                                      |
| RCBTB1    | RCC1 and BTB domain containing protein 1 [Source:HGNC Symbol;Acc:HGNC:18243]                          |
| RFX2      | regulatory factor X2 [Source:HGNC Symbol;Acc:HGNC:9983]                                               |
| RMI1      | RecQ mediated genome instability 1 [Source:HGNC Symbol;Acc:HGNC:25764]                                |
| SERPINA12 | serpin family A member 12 [Source:HGNC Symbol;Acc:HGNC:18359]                                         |
| TMEM164   | transmembrane protein 164 [Source:HGNC Symbol;Acc:HGNC:26217]                                         |
| ZCCHC11   | zinc finger CCHC-type containing 11 [Source:HGNC Symbol;Acc:HGNC:28981]                               |
| USP4      | ubiquitin specific peptidase 4 [Source:HGNC Symbol;Acc:HGNC:12627]                                    |
| AGXT2     | alanine--glyoxylate aminotransferase 2 [Source:HGNC Symbol;Acc:HGNC:14412]                            |
| AMDHD2    | amidohydrolase domain containing 2 [Source:HGNC Symbol;Acc:HGNC:24262]                                |
| AVIL      | advillin [Source:HGNC Symbol;Acc:HGNC:14188]                                                          |
| BCL11B    | B-cell CLL/lymphoma 11B [Source:HGNC Symbol;Acc:HGNC:13222]                                           |
| COX6B2    | cytochrome c oxidase subunit 6B2 [Source:HGNC Symbol;Acc:HGNC:24380]                                  |
| CUBN      | cubilin [Source:HGNC Symbol;Acc:HGNC:2548]                                                            |
| EIF2AK1   | eukaryotic translation initiation factor 2 alpha kinase 1 [Source:HGNC Symbol;Acc:HGNC:24921]         |
| IFIT2     | interferon induced protein with tetratricopeptide repeats 2 [Source:HGNC Symbol;Acc:HGNC:5409]        |
| LGALS3BP  | galectin 3 binding protein [Source:HGNC Symbol;Acc:HGNC:6564]                                         |
| LRR8C     | leucine rich repeat containing 8 family member C [Source:HGNC Symbol;Acc:HGNC:25075]                  |



|          |                                                                                 |
|----------|---------------------------------------------------------------------------------|
| NDUFA8   | NADH:ubiquinone oxidoreductase subunit A8 [Source:HGNC Symbol;Acc:HGNC:7692]    |
| NPR3     | natriuretic peptide receptor 3 [Source:HGNC Symbol;Acc:HGNC:7945]               |
| OS9      | OS9, endoplasmic reticulum lectin [Source:HGNC Symbol;Acc:HGNC:16994]           |
| RHEBL1   | Ras homolog enriched in brain like 1 [Source:HGNC Symbol;Acc:HGNC:21166]        |
| SLC2A13  | solute carrier family 2 member 13 [Source:HGNC Symbol;Acc:HGNC:15956]           |
| SLC39A5  | solute carrier family 39 member 5 [Source:HGNC Symbol;Acc:HGNC:20502]           |
| AATF     | apoptosis antagonizing transcription factor [Source:HGNC Symbol;Acc:HGNC:19235] |
| BCAS2    | breast carcinoma amplified sequence 2 [Source:HGNC Symbol;Acc:HGNC:975]         |
| BRD7     | bromodomain containing 7 [Source:HGNC Symbol;Acc:HGNC:14310]                    |
| CDKL5    | cyclin dependent kinase like 5 [Source:HGNC Symbol;Acc:HGNC:11411]              |
| KIAA1524 | KIAA1524 [Source:HGNC Symbol;Acc:HGNC:29302]                                    |
| CRYZL1   | crystallin zeta like 1 [Source:HGNC Symbol;Acc:HGNC:2420]                       |

|         |                                                                                                 |
|---------|-------------------------------------------------------------------------------------------------|
| DDX27   | DEAD-box helicase 27 [Source:HGNC Symbol;Acc:HGNC:15837]                                        |
| DDX50   | DEAD-box helicase 50 [Source:HGNC Symbol;Acc:HGNC:17906]                                        |
| INSM1   | INSM transcriptional repressor 1 [Source:HGNC Symbol;Acc:HGNC:6090]                             |
| IQCK    | IQ motif containing K [Source:HGNC Symbol;Acc:HGNC:28556]                                       |
| KIF7    | kinesin family member 7 [Source:HGNC Symbol;Acc:HGNC:30497]                                     |
| LIN54   | lin-54 DREAM MuvB core complex component [Source:HGNC Symbol;Acc:HGNC:25397]                    |
| MRPL15  | mitochondrial ribosomal protein L15 [Source:HGNC Symbol;Acc:HGNC:14054]                         |
| MRPL16  | mitochondrial ribosomal protein L16 [Source:HGNC Symbol;Acc:HGNC:14476]                         |
| MRPL40  | mitochondrial ribosomal protein L40 [Source:HGNC Symbol;Acc:HGNC:14491]                         |
| PWP2    | PWP2 periodic tryptophan protein homolog (yeast) [Source:HGNC Symbol;Acc:HGNC:9711]             |
| RHNO1   | RAD9-HUS1-RAD1 interacting nuclear orphan 1 [Source:HGNC Symbol;Acc:HGNC:28206]                 |
| SETMAR  | SET domain and mariner transposase fusion gene [Source:HGNC Symbol;Acc:HGNC:10762]              |
| SLC30A6 | solute carrier family 30 member 6 [Source:HGNC Symbol;Acc:HGNC:19305]                           |
| SYNE3   | spectrin repeat containing nuclear envelope family member 3 [Source:HGNC Symbol;Acc:HGNC:19861] |
| TAF5    | TATA-box binding protein associated factor 5 [Source:HGNC Symbol;Acc:HGNC:11539]                |
| TMEM41B | transmembrane protein 41B [Source:HGNC Symbol;Acc:HGNC:28948]                                   |
| WDR5    | WD repeat domain 5 [Source:HGNC Symbol;Acc:HGNC:12757]                                          |
| ZFP62   | ZFP62 zinc finger protein [Source:HGNC Symbol;Acc:HGNC:23241]                                   |
| ZNF367  | zinc finger protein 367 [Source:HGNC Symbol;Acc:HGNC:18320]                                     |
| AFM     | afamin [Source:HGNC Symbol;Acc:HGNC:316]                                                        |
| ATP13A2 | ATPase 13A2 [Source:HGNC Symbol;Acc:HGNC:30213]                                                 |
| CBFA2T3 | CBFA2/RUNX1 translocation partner 3 [Source:HGNC Symbol;Acc:HGNC:1537]                          |
| EDA2R   | ectodysplasin A2 receptor [Source:HGNC Symbol;Acc:HGNC:17756]                                   |

|         |                                                                                                        |
|---------|--------------------------------------------------------------------------------------------------------|
| EYA2    | EYA transcriptional coactivator and phosphatase 2 [Source:HGNC Symbol;Acc:HGNC:3520]                   |
| FCMR    | Fc fragment of IgM receptor [Source:HGNC Symbol;Acc:HGNC:14315]                                        |
| FOXP1   | forkhead box P1 [Source:HGNC Symbol;Acc:HGNC:3823]                                                     |
| GATA6   | GATA binding protein 6 [Source:HGNC Symbol;Acc:HGNC:4174]                                              |
| GPAT3   | glycerol-3-phosphate acyltransferase 3 [Source:HGNC Symbol;Acc:HGNC:28157]                             |
| GPR37   | G protein-coupled receptor 37 [Source:HGNC Symbol;Acc:HGNC:4494]                                       |
| IMPACT  | impact RWD domain protein [Source:HGNC Symbol;Acc:HGNC:20387]                                          |
| KYAT3   | kynurenine aminotransferase 3 [Source:HGNC Symbol;Acc:HGNC:33238]                                      |
| LSM6    | LSM6 homolog, U6 small nuclear RNA and mRNA degradation associated [Source:HGNC Symbol;Acc:HGNC:17017] |
| PCF11   | PCF11 cleavage and polyadenylation factor subunit [Source:HGNC Symbol;Acc:HGNC:30097]                  |
| PHACTR1 | phosphatase and actin regulator 1 [Source:HGNC Symbol;Acc:HGNC:20990]                                  |
| SGPP1   | sphingosine-1-phosphate phosphatase 1 [Source:HGNC Symbol;Acc:HGNC:17720]                              |
| ST6GAL1 | ST6 beta-galactoside alpha-2,6-sialyltransferase 1 [Source:HGNC Symbol;Acc:HGNC:10860]                 |
| WNT4    | Wnt family member 4 [Source:HGNC Symbol;Acc:HGNC:12783]                                                |
| WNT6    | Wnt family member 6 [Source:HGNC Symbol;Acc:HGNC:12785]                                                |
| CTDSPL2 | CTD small phosphatase like 2 [Source:HGNC Symbol;Acc:HGNC:26936]                                       |
| DDX52   | DEAD-box helicase 52 [Source:HGNC Symbol;Acc:HGNC:20038]                                               |
| EXOSC6  | exosome component 6 [Source:HGNC Symbol;Acc:HGNC:19055]                                                |
| EYA3    | EYA transcriptional coactivator and phosphatase 3 [Source:HGNC Symbol;Acc:HGNC:3521]                   |
| ILVBL   | ilvB (bacterial acetolactate synthase)-like [Source:HGNC Symbol;Acc:HGNC:6041]                         |
| IMMP1L  | inner mitochondrial membrane peptidase subunit 1 [Source:HGNC Symbol;Acc:HGNC:26317]                   |
| IWS1    | IWS1, SUPT6H interacting protein [Source:HGNC Symbol;Acc:HGNC:25467]                                   |
| LST1    | leukocyte specific transcript 1 [Source:HGNC Symbol;Acc:HGNC:14189]                                    |
| MPPED2  | metallophosphoesterase domain containing 2 [Source:HGNC Symbol;Acc:HGNC:1180]                          |
| MRPS12  | mitochondrial ribosomal protein S12 [Source:HGNC Symbol;Acc:HGNC:10380]                                |
| REPS1   | RALBP1 associated Eps domain containing 1 [Source:HGNC Symbol;Acc:HGNC:15578]                          |
| RTCA    | RNA 3'-terminal phosphate cyclase [Source:HGNC Symbol;Acc:HGNC:17981]                                  |
| RUNDC3A | RUN domain containing 3A [Source:HGNC Symbol;Acc:HGNC:16984]                                           |
| TIMM22  | translocase of inner mitochondrial membrane 22 homolog (yeast) [Source:HGNC Symbol;Acc:HGNC:17317]     |
| TMEM70  | transmembrane protein 70 [Source:HGNC Symbol;Acc:HGNC:26050]                                           |
| TSFM    | Ts translation elongation factor, mitochondrial [Source:HGNC Symbol;Acc:HGNC:12367]                    |
| TSTD1   | thiosulfate sulfurtransferase like domain containing 1 [Source:HGNC Symbol;Acc:HGNC:35410]             |
| UROS    | uroporphyrinogen III synthase [Source:HGNC Symbol;Acc:HGNC:12592]                                      |
| WNK2    | WNK lysine deficient protein kinase 2 [Source:HGNC Symbol;Acc:HGNC:14542]                              |

|          |                                                                                              |
|----------|----------------------------------------------------------------------------------------------|
| WRN      | Werner syndrome RecQ like helicase [Source:HGNC Symbol;Acc:HGNC:12791]                       |
| ADAM15   | ADAM metallopeptidase domain 15 [Source:HGNC Symbol;Acc:HGNC:193]                            |
| ARHGEF6  | Rac/Cdc42 guanine nucleotide exchange factor 6 [Source:HGNC Symbol;Acc:HGNC:685]             |
| C11orf96 | chromosome 11 open reading frame 96 [Source:HGNC Symbol;Acc:HGNC:38675]                      |
| C8G      | complement component 8, gamma polypeptide [Source:HGNC Symbol;Acc:HGNC:1354]                 |
| CADPS    | calcium dependent secretion activator [Source:HGNC Symbol;Acc:HGNC:1426]                     |
| CDK2AP2  | cyclin dependent kinase 2 associated protein 2 [Source:HGNC Symbol;Acc:HGNC:30833]           |
| CPA4     | carboxypeptidase A4 [Source:HGNC Symbol;Acc:HGNC:15740]                                      |
| CPNE3    | copine 3 [Source:HGNC Symbol;Acc:HGNC:2316]                                                  |
| DOT1L    | DOT1 like histone lysine methyltransferase [Source:HGNC Symbol;Acc:HGNC:24948]               |
| ERF      | ETS2 repressor factor [Source:HGNC Symbol;Acc:HGNC:3444]                                     |
| ERP44    | endoplasmic reticulum protein 44 [Source:HGNC Symbol;Acc:HGNC:18311]                         |
| F7       | coagulation factor VII [Source:HGNC Symbol;Acc:HGNC:3544]                                    |
| FAF1     | Fas associated factor 1 [Source:HGNC Symbol;Acc:HGNC:3578]                                   |
| FAT3     | FAT atypical cadherin 3 [Source:HGNC Symbol;Acc:HGNC:23112]                                  |
| HMG5     | high mobility group nucleosome binding domain 5 [Source:HGNC Symbol;Acc:HGNC:8013]           |
| HOGA1    | 4-hydroxy-2-oxoglutarate aldolase 1 [Source:HGNC Symbol;Acc:HGNC:25155]                      |
| HS6ST2   | heparan sulfate 6-O-sulfotransferase 2 [Source:HGNC Symbol;Acc:HGNC:19133]                   |
| MOCS1    | molybdenum cofactor synthesis 1 [Source:HGNC Symbol;Acc:HGNC:7190]                           |
| MYL12A   | myosin light chain 12A [Source:HGNC Symbol;Acc:HGNC:16701]                                   |
| PAWR     | pro-apoptotic WT1 regulator [Source:HGNC Symbol;Acc:HGNC:8614]                               |
| PCDH8    | protocadherin 8 [Source:HGNC Symbol;Acc:HGNC:8660]                                           |
| PGLS     | 6-phosphogluconolactonase [Source:HGNC Symbol;Acc:HGNC:8903]                                 |
| RAB40B   | RAB40B, member RAS oncogene family [Source:HGNC Symbol;Acc:HGNC:18284]                       |
| RGS20    | regulator of G-protein signaling 20 [Source:HGNC Symbol;Acc:HGNC:14600]                      |
| RPL7A    | ribosomal protein L7a [Source:HGNC Symbol;Acc:HGNC:10364]                                    |
| SCN3A    | sodium voltage-gated channel alpha subunit 3 [Source:HGNC Symbol;Acc:HGNC:10590]             |
| SH3GL3   | SH3 domain containing GRB2 like endophilin A3 [Source:HGNC Symbol;Acc:HGNC:10832]            |
| SLC16A11 | solute carrier family 16 member 11 [Source:HGNC Symbol;Acc:HGNC:23093]                       |
| SLC17A3  | solute carrier family 17 member 3 [Source:HGNC Symbol;Acc:HGNC:10931]                        |
| SLC25A24 | solute carrier family 25 member 24 [Source:HGNC Symbol;Acc:HGNC:20662]                       |
| STX2     | syntaxin 2 [Source:HGNC Symbol;Acc:HGNC:3403]                                                |
| TTPAL    | alpha tocopherol transfer protein like [Source:HGNC Symbol;Acc:HGNC:16114]                   |
| ARPC5    | actin related protein 2/3 complex subunit 5 [Source:HGNC Symbol;Acc:HGNC:708]                |
| ASH2L    | ASH2 like histone lysine methyltransferase complex subunit [Source:HGNC Symbol;Acc:HGNC:744] |

|         |                                                                                                                                        |
|---------|----------------------------------------------------------------------------------------------------------------------------------------|
| ATP5A1  | ATP synthase, H <sup>+</sup> transporting, mitochondrial F1 complex, alpha subunit 1, cardiac muscle [Source:HGNC Symbol;Acc:HGNC:823] |
| ATP6V1F | ATPase H <sup>+</sup> transporting V1 subunit F [Source:HGNC Symbol;Acc:HGNC:16832]                                                    |
| CORO1B  | coronin 1B [Source:HGNC Symbol;Acc:HGNC:2253]                                                                                          |
| CSTF1   | cleavage stimulation factor subunit 1 [Source:HGNC Symbol;Acc:HGNC:2483]                                                               |
| DDX42   | DEAD-box helicase 42 [Source:HGNC Symbol;Acc:HGNC:18676]                                                                               |
| DYNC2H1 | dynein cytoplasmic 2 heavy chain 1 [Source:HGNC Symbol;Acc:HGNC:2962]                                                                  |
| EMC9    | ER membrane protein complex subunit 9 [Source:HGNC Symbol;Acc:HGNC:20273]                                                              |
| HNRNPLL | heterogeneous nuclear ribonucleoprotein L like [Source:HGNC Symbol;Acc:HGNC:25127]                                                     |
| MICA    | MHC class I polypeptide-related sequence A [Source:HGNC Symbol;Acc:HGNC:7090]                                                          |
| MRPS31  | mitochondrial ribosomal protein S31 [Source:HGNC Symbol;Acc:HGNC:16632]                                                                |
| NCOA5   | nuclear receptor coactivator 5 [Source:HGNC Symbol;Acc:HGNC:15909]                                                                     |
| NTPCR   | nucleoside-triphosphatase, cancer-related [Source:HGNC Symbol;Acc:HGNC:28204]                                                          |
| NUP107  | nucleoporin 107 [Source:HGNC Symbol;Acc:HGNC:29914]                                                                                    |
| PINX1   | PIN2/TERF1 interacting, telomerase inhibitor 1 [Source:HGNC Symbol;Acc:HGNC:30046]                                                     |
| POLR2I  | polymerase (RNA) II subunit I [Source:HGNC Symbol;Acc:HGNC:9196]                                                                       |
| RAB21   | RAB21, member RAS oncogene family [Source:HGNC Symbol;Acc:HGNC:18263]                                                                  |
| RSBN1   | round spermatid basic protein 1 [Source:HGNC Symbol;Acc:HGNC:25642]                                                                    |
| SBF2    | SET binding factor 2 [Source:HGNC Symbol;Acc:HGNC:2135]                                                                                |
| TMEM109 | transmembrane protein 109 [Source:HGNC Symbol;Acc:HGNC:28771]                                                                          |
| YIF1A   | Yip1 interacting factor homolog A, membrane trafficking protein [Source:HGNC Symbol;Acc:HGNC:16688]                                    |
| ZBTB2   | zinc finger and BTB domain containing 2 [Source:HGNC Symbol;Acc:HGNC:20868]                                                            |
| CISH    | cytokine inducible SH2 containing protein [Source:HGNC Symbol;Acc:HGNC:1984]                                                           |
| CPA1    | carboxypeptidase A1 [Source:HGNC Symbol;Acc:HGNC:2296]                                                                                 |
| DUSP9   | dual specificity phosphatase 9 [Source:HGNC Symbol;Acc:HGNC:3076]                                                                      |
| EXOC3   | exocyst complex component 3 [Source:HGNC Symbol;Acc:HGNC:30378]                                                                        |
| GABPB1  | GA binding protein transcription factor beta subunit 1 [Source:HGNC Symbol;Acc:HGNC:4074]                                              |
| GRHPR   | glyoxylate reductase/hydroxypyruvate reductase [Source:HGNC Symbol;Acc:HGNC:4570]                                                      |
| NDUFS7  | NADH:ubiquinone oxidoreductase core subunit S7 [Source:HGNC Symbol;Acc:HGNC:7714]                                                      |
| PCYT1A  | phosphate cytidylyltransferase 1, choline, alpha [Source:HGNC Symbol;Acc:HGNC:8754]                                                    |
| PRR13   | proline rich 13 [Source:HGNC Symbol;Acc:HGNC:24528]                                                                                    |
| RPL34   | ribosomal protein L34 [Source:HGNC Symbol;Acc:HGNC:10340]                                                                              |
| SH3GL2  | SH3 domain containing GRB2 like 2, endophilin A1 [Source:HGNC Symbol;Acc:HGNC:10831]                                                   |
| SNTG2   | syntrophin gamma 2 [Source:HGNC Symbol;Acc:HGNC:13741]                                                                                 |
| SRRM1   | serine and arginine repetitive matrix 1 [Source:HGNC Symbol;Acc:HGNC:16638]                                                            |

|          |                                                                                                   |
|----------|---------------------------------------------------------------------------------------------------|
| WWP1     | WW domain containing E3 ubiquitin protein ligase 1 [Source:HGNC Symbol;Acc:HGNC:17004]            |
| XPC      | XPC complex subunit, DNA damage recognition and repair factor [Source:HGNC Symbol;Acc:HGNC:12816] |
| ARHGAP9  | Rho GTPase activating protein 9 [Source:HGNC Symbol;Acc:HGNC:14130]                               |
| CCL21    | C-C motif chemokine ligand 21 [Source:HGNC Symbol;Acc:HGNC:10620]                                 |
| APITD1   | apoptosis-inducing, TAF9-like domain 1 [Source:HGNC Symbol;Acc:HGNC:23163]                        |
| FICD     | FIC domain containing [Source:HGNC Symbol;Acc:HGNC:18416]                                         |
| FYTTD1   | forty-two-three domain containing 1 [Source:HGNC Symbol;Acc:HGNC:25407]                           |
| HINT2    | histidine triad nucleotide binding protein 2 [Source:HGNC Symbol;Acc:HGNC:18344]                  |
| LYPD6    | LY6/PLAUR domain containing 6 [Source:HGNC Symbol;Acc:HGNC:28751]                                 |
| MBOAT7   | membrane bound O-acyltransferase domain containing 7 [Source:HGNC Symbol;Acc:HGNC:15505]          |
| MRPS33   | mitochondrial ribosomal protein S33 [Source:HGNC Symbol;Acc:HGNC:16634]                           |
| NUFIP2   | NUFIP2, FMR1 interacting protein 2 [Source:HGNC Symbol;Acc:HGNC:17634]                            |
| POLR2G   | polymerase (RNA) II subunit G [Source:HGNC Symbol;Acc:HGNC:9194]                                  |
| RBM22    | RNA binding motif protein 22 [Source:HGNC Symbol;Acc:HGNC:25503]                                  |
| SF3B5    | splicing factor 3b subunit 5 [Source:HGNC Symbol;Acc:HGNC:21083]                                  |
| TMC4     | transmembrane channel like 4 [Source:HGNC Symbol;Acc:HGNC:22998]                                  |
| TWF2     | twinfilin actin binding protein 2 [Source:HGNC Symbol;Acc:HGNC:9621]                              |
| ZMPSTE24 | zinc metalloproteinase STE24 [Source:HGNC Symbol;Acc:HGNC:12877]                                  |
| ADAMTSL4 | ADAMTS like 4 [Source:HGNC Symbol;Acc:HGNC:19706]                                                 |
| ATP6V0B  | ATPase H <sup>+</sup> transporting V0 subunit b [Source:HGNC Symbol;Acc:HGNC:861]                 |
| CLEC11A  | C-type lectin domain family 11 member A [Source:HGNC Symbol;Acc:HGNC:10576]                       |
| CTBP1    | C-terminal binding protein 1 [Source:HGNC Symbol;Acc:HGNC:2494]                                   |
| LGALS4   | galectin 4 [Source:HGNC Symbol;Acc:HGNC:6565]                                                     |
| LRIG3    | leucine rich repeats and immunoglobulin like domains 3 [Source:HGNC Symbol;Acc:HGNC:30991]        |
| MTMR11   | myotubularin related protein 11 [Source:HGNC Symbol;Acc:HGNC:24307]                               |
| PNKD     | paroxysmal nonkinesigenic dyskinesia [Source:HGNC Symbol;Acc:HGNC:9153]                           |
| RSPO3    | R-spondin 3 [Source:HGNC Symbol;Acc:HGNC:20866]                                                   |
| SLC17A1  | solute carrier family 17 member 1 [Source:HGNC Symbol;Acc:HGNC:10929]                             |
| SLC26A1  | solute carrier family 26 member 1 [Source:HGNC Symbol;Acc:HGNC:10993]                             |
| UBE2D2   | ubiquitin conjugating enzyme E2 D2 [Source:HGNC Symbol;Acc:HGNC:12475]                            |
| ACP6     | acid phosphatase 6, lysophosphatidic [Source:HGNC Symbol;Acc:HGNC:29609]                          |
| BCAP31   | B-cell receptor-associated protein 31 [Source:HGNC Symbol;Acc:HGNC:16695]                         |
| CDC123   | cell division cycle 123 [Source:HGNC Symbol;Acc:HGNC:16827]                                       |
| CUL5     | cullin 5 [Source:HGNC Symbol;Acc:HGNC:2556]                                                       |
| EED      | embryonic ectoderm development [Source:HGNC Symbol;Acc:HGNC:3188]                                 |
| ERLIN2   | ER lipid raft associated 2 [Source:HGNC Symbol;Acc:HGNC:1356]                                     |
| G6PC3    | glucose-6-phosphatase catalytic subunit 3 [Source:HGNC Symbol;Acc:HGNC:24861]                     |
| GNPNAT1  | glucosamine-phosphate N-acetyltransferase 1 [Source:HGNC Symbol;Acc:HGNC:19980]                   |

|          |                                                                                                        |
|----------|--------------------------------------------------------------------------------------------------------|
| NMRAL1   | NmrA-like family domain containing 1 [Source:HGNC Symbol;Acc:HGNC:24987]                               |
| POMP     | proteasome maturation protein [Source:HGNC Symbol;Acc:HGNC:20330]                                      |
| PRKAG1   | protein kinase AMP-activated non-catalytic subunit gamma 1 [Source:HGNC Symbol;Acc:HGNC:9385]          |
| SIAH1    | siah E3 ubiquitin protein ligase 1 [Source:HGNC Symbol;Acc:HGNC:10857]                                 |
| SNX3     | sorting nexin 3 [Source:HGNC Symbol;Acc:HGNC:11174]                                                    |
| SRP68    | signal recognition particle 68 [Source:HGNC Symbol;Acc:HGNC:11302]                                     |
| STT3B    | STT3B, catalytic subunit of the oligosaccharyltransferase complex [Source:HGNC Symbol;Acc:HGNC:30611]  |
| SULT4A1  | sulfotransferase family 4A member 1 [Source:HGNC Symbol;Acc:HGNC:14903]                                |
| TMEM263  | transmembrane protein 263 [Source:HGNC Symbol;Acc:HGNC:28281]                                          |
| UBE2V1   | ubiquitin conjugating enzyme E2 V1 [Source:HGNC Symbol;Acc:HGNC:12494]                                 |
| AEBP1    | AE binding protein 1 [Source:HGNC Symbol;Acc:HGNC:303]                                                 |
| CAB39L   | calcium binding protein 39 like [Source:HGNC Symbol;Acc:HGNC:20290]                                    |
| CDC42EP2 | CDC42 effector protein 2 [Source:HGNC Symbol;Acc:HGNC:16263]                                           |
| CIDEB    | cell death-inducing DFFA-like effector b [Source:HGNC Symbol;Acc:HGNC:1977]                            |
| CRLF1    | cytokine receptor like factor 1 [Source:HGNC Symbol;Acc:HGNC:2364]                                     |
| CYP4B1   | cytochrome P450 family 4 subfamily B member 1 [Source:HGNC Symbol;Acc:HGNC:2644]                       |
| DEXI     | Dexi homolog [Source:HGNC Symbol;Acc:HGNC:13267]                                                       |
| F2RL1    | F2R like trypsin receptor 1 [Source:HGNC Symbol;Acc:HGNC:3538]                                         |
| FBXL20   | F-box and leucine rich repeat protein 20 [Source:HGNC Symbol;Acc:HGNC:24679]                           |
| FSTL3    | folliculin like 3 [Source:HGNC Symbol;Acc:HGNC:3973]                                                   |
| GNS      | glucosamine (N-acetyl)-6-sulfatase [Source:HGNC Symbol;Acc:HGNC:4422]                                  |
| GREM2    | gremlin 2, DAN family BMP antagonist [Source:HGNC Symbol;Acc:HGNC:17655]                               |
| KANK2    | KN motif and ankyrin repeat domains 2 [Source:HGNC Symbol;Acc:HGNC:29300]                              |
| LHPP     | phospholysine phosphohistidine inorganic pyrophosphate phosphatase [Source:HGNC Symbol;Acc:HGNC:30042] |
| MT1M     | metallothionein 1M [Source:HGNC Symbol;Acc:HGNC:14296]                                                 |
| MYO1C    | myosin IC [Source:HGNC Symbol;Acc:HGNC:7597]                                                           |
| NDUFS8   | NADH:ubiquinone oxidoreductase core subunit S8 [Source:HGNC Symbol;Acc:HGNC:7715]                      |
| PDLIM4   | PDZ and LIM domain 4 [Source:HGNC Symbol;Acc:HGNC:16501]                                               |
| PER3     | period circadian clock 3 [Source:HGNC Symbol;Acc:HGNC:8847]                                            |
| PRR11    | proline rich 11 [Source:HGNC Symbol;Acc:HGNC:25619]                                                    |
| PTP4A3   | protein tyrosine phosphatase type IVA, member 3 [Source:HGNC Symbol;Acc:HGNC:9636]                     |
| RAB4A    | RAB4A, member RAS oncogene family [Source:HGNC Symbol;Acc:HGNC:9781]                                   |
| RALGPS2  | Ral GEF with PH domain and SH3 binding motif 2 [Source:HGNC Symbol;Acc:HGNC:30279]                     |
| RNMT     | RNA guanine-7 methyltransferase [Source:HGNC Symbol;Acc:HGNC:10075]                                    |
| SBNO1    | strawberry notch homolog 1 (Drosophila) [Source:HGNC Symbol;Acc:HGNC:22973]                            |
| SCRN1    | secernin 1 [Source:HGNC Symbol;Acc:HGNC:22192]                                                         |

|         |                                                                                                       |
|---------|-------------------------------------------------------------------------------------------------------|
| SIAE    | sialic acid acetyltransferase [Source:HGNC Symbol;Acc:HGNC:18187]                                     |
| SLC16A4 | solute carrier family 16 member 4 [Source:HGNC Symbol;Acc:HGNC:10925]                                 |
| SYT11   | synaptotagmin 11 [Source:HGNC Symbol;Acc:HGNC:19239]                                                  |
| TBX3    | T-box 3 [Source:HGNC Symbol;Acc:HGNC:11602]                                                           |
| TCEAL9  | transcription elongation factor A like 9 [Source:HGNC Symbol;Acc:HGNC:30084]                          |
| TNFSF13 | tumor necrosis factor superfamily member 13 [Source:HGNC Symbol;Acc:HGNC:11928]                       |
| ZBTB4   | zinc finger and BTB domain containing 4 [Source:HGNC Symbol;Acc:HGNC:23847]                           |
| ABHD15  | abhydrolase domain containing 15 [Source:HGNC Symbol;Acc:HGNC:26971]                                  |
| AMFR    | autocrine motility factor receptor [Source:HGNC Symbol;Acc:HGNC:463]                                  |
| AMOTL1  | angiomin like 1 [Source:HGNC Symbol;Acc:HGNC:17811]                                                   |
| ARF5    | ADP ribosylation factor 5 [Source:HGNC Symbol;Acc:HGNC:658]                                           |
| CLTA    | clathrin light chain A [Source:HGNC Symbol;Acc:HGNC:2090]                                             |
| ENPP4   | ectonucleotide pyrophosphatase/phosphodiesterase 4 (putative) [Source:HGNC Symbol;Acc:HGNC:3359]      |
| FCHO2   | FCH domain only 2 [Source:HGNC Symbol;Acc:HGNC:25180]                                                 |
| FES     | FES proto-oncogene, tyrosine kinase [Source:HGNC Symbol;Acc:HGNC:3657]                                |
| HAVCR2  | hepatitis A virus cellular receptor 2 [Source:HGNC Symbol;Acc:HGNC:18437]                             |
| ILDR2   | immunoglobulin like domain containing receptor 2 [Source:HGNC Symbol;Acc:HGNC:18131]                  |
| KRT20   | keratin 20 [Source:HGNC Symbol;Acc:HGNC:20412]                                                        |
| MMD2    | monocyte to macrophage differentiation associated 2 [Source:HGNC Symbol;Acc:HGNC:30133]               |
| MRPL24  | mitochondrial ribosomal protein L24 [Source:HGNC Symbol;Acc:HGNC:14037]                               |
| MRPS18A | mitochondrial ribosomal protein S18A [Source:HGNC Symbol;Acc:HGNC:14515]                              |
| MYLPF   | myosin light chain, phosphorylatable, fast skeletal muscle [Source:HGNC Symbol;Acc:HGNC:29824]        |
| NUDT12  | nudix hydrolase 12 [Source:HGNC Symbol;Acc:HGNC:18826]                                                |
| PYCR2   | pyrroline-5-carboxylate reductase family member 2 [Source:HGNC Symbol;Acc:HGNC:30262]                 |
| RNFT2   | ring finger protein, transmembrane 2 [Source:HGNC Symbol;Acc:HGNC:25905]                              |
| SEC22B  | SEC22 homolog B, vesicle trafficking protein (gene/pseudogene) [Source:HGNC Symbol;Acc:HGNC:10700]    |
| SLF1    | SMC5-SMC6 complex localization factor 1 [Source:HGNC Symbol;Acc:HGNC:25408]                           |
| STOML2  | stomatin like 2 [Source:HGNC Symbol;Acc:HGNC:14559]                                                   |
| SULT1A2 | sulfotransferase family 1A member 2 [Source:HGNC Symbol;Acc:HGNC:11454]                               |
| TEX30   | testis expressed 30 [Source:HGNC Symbol;Acc:HGNC:25188]                                               |
| TFAP4   | transcription factor AP-4 (activating enhancer binding protein 4) [Source:HGNC Symbol;Acc:HGNC:11745] |
| TMED4   | transmembrane p24 trafficking protein 4 [Source:HGNC Symbol;Acc:HGNC:22301]                           |
| TOMM7   | translocase of outer mitochondrial membrane 7 [Source:HGNC Symbol;Acc:HGNC:21648]                     |
| ZBTB7A  | zinc finger and BTB domain containing 7A [Source:HGNC Symbol;Acc:HGNC:18078]                          |
| COL5A2  | collagen type V alpha 2 chain [Source:HGNC Symbol;Acc:HGNC:2210]                                      |

|         |                                                                                                 |
|---------|-------------------------------------------------------------------------------------------------|
| GDPD1   | glycerophosphodiester phosphodiesterase domain containing 1 [Source:HGNC Symbol;Acc:HGNC:20883] |
| KPNA4   | karyopherin subunit alpha 4 [Source:HGNC Symbol;Acc:HGNC:6397]                                  |
| MSH3    | mutS homolog 3 [Source:HGNC Symbol;Acc:HGNC:7326]                                               |
| PDE1C   | phosphodiesterase 1C [Source:HGNC Symbol;Acc:HGNC:8776]                                         |
| PPCS    | phosphopantothenoylecysteine synthetase [Source:HGNC Symbol;Acc:HGNC:25686]                     |
| PSMD6   | proteasome 26S subunit, non-ATPase 6 [Source:HGNC Symbol;Acc:HGNC:9564]                         |
| SLC30A2 | solute carrier family 30 member 2 [Source:HGNC Symbol;Acc:HGNC:11013]                           |
| SREK1   | splicing regulatory glutamic acid and lysine rich protein 1 [Source:HGNC Symbol;Acc:HGNC:17882] |
| TAF9B   | TATA-box binding protein associated factor 9b [Source:HGNC Symbol;Acc:HGNC:17306]               |
| TSPAN33 | tetraspanin 33 [Source:HGNC Symbol;Acc:HGNC:28743]                                              |
| BNIP1   | BCL2/adenovirus E1B 19kDa interacting protein 1 [Source:HGNC Symbol;Acc:HGNC:1082]              |
| BRI3BP  | BRI3 binding protein [Source:HGNC Symbol;Acc:HGNC:14251]                                        |
| CCDC113 | coiled-coil domain containing 113 [Source:HGNC Symbol;Acc:HGNC:25002]                           |
| CHCHD2  | coiled-coil-helix-coiled-coil-helix domain containing 2 [Source:HGNC Symbol;Acc:HGNC:21645]     |
| CNST    | consortin, connexin sorting protein [Source:HGNC Symbol;Acc:HGNC:26486]                         |
| DHRS1   | dehydrogenase/reductase 1 [Source:HGNC Symbol;Acc:HGNC:16445]                                   |
| DOK4    | docking protein 4 [Source:HGNC Symbol;Acc:HGNC:19868]                                           |
| GSG2    | germ cell associated 2, haspin [Source:HGNC Symbol;Acc:HGNC:19682]                              |
| HYKK    | hydroxylysine kinase [Source:HGNC Symbol;Acc:HGNC:34403]                                        |
| IPCEF1  | interaction protein for cytohesin exchange factors 1 [Source:HGNC Symbol;Acc:HGNC:21204]        |
| MRPL46  | mitochondrial ribosomal protein L46 [Source:HGNC Symbol;Acc:HGNC:1192]                          |
| NCBP1   | nuclear cap binding protein subunit 1 [Source:HGNC Symbol;Acc:HGNC:7658]                        |
| P2RY12  | purinergic receptor P2Y12 [Source:HGNC Symbol;Acc:HGNC:18124]                                   |
| PAQR5   | progesterone and adipoQ receptor family member 5 [Source:HGNC Symbol;Acc:HGNC:29645]            |
| PTPMT1  | protein tyrosine phosphatase, mitochondrial 1 [Source:HGNC Symbol;Acc:HGNC:26965]               |
| RCOR1   | REST corepressor 1 [Source:HGNC Symbol;Acc:HGNC:17441]                                          |
| REEP4   | receptor accessory protein 4 [Source:HGNC Symbol;Acc:HGNC:26176]                                |
| RTN3    | reticulon 3 [Source:HGNC Symbol;Acc:HGNC:10469]                                                 |
| SCX     | scleraxis bHLH transcription factor [Source:HGNC Symbol;Acc:HGNC:32322]                         |
| SGCG    | sarcoglycan gamma [Source:HGNC Symbol;Acc:HGNC:10809]                                           |
| SNX4    | sorting nexin 4 [Source:HGNC Symbol;Acc:HGNC:11175]                                             |
| SPDEF   | SAM pointed domain containing ETS transcription factor [Source:HGNC Symbol;Acc:HGNC:17257]      |
| STX8    | syntaphin 8 [Source:HGNC Symbol;Acc:HGNC:11443]                                                 |
| SYNGR3  | synaptogyrin 3 [Source:HGNC Symbol;Acc:HGNC:11501]                                              |



|         |                                                                                                     |
|---------|-----------------------------------------------------------------------------------------------------|
| TMEM237 | transmembrane protein 237 [Source:HGNC Symbol;Acc:HGNC:14432]                                       |
| TSG101  | tumor susceptibility 101 [Source:HGNC Symbol;Acc:HGNC:15971]                                        |
| VDAC3   | voltage dependent anion channel 3 [Source:HGNC Symbol;Acc:HGNC:12674]                               |
| WNT10A  | Wnt family member 10A [Source:HGNC Symbol;Acc:HGNC:13829]                                           |
| GABRD   | gamma-aminobutyric acid type A receptor delta subunit [Source:HGNC Symbol;Acc:HGNC:4084]            |
| GDI1    | GDP dissociation inhibitor 1 [Source:HGNC Symbol;Acc:HGNC:4226]                                     |
| GLCCI1  | glucocorticoid induced 1 [Source:HGNC Symbol;Acc:HGNC:18713]                                        |
| IL18R1  | interleukin 18 receptor 1 [Source:HGNC Symbol;Acc:HGNC:5988]                                        |
| PLA2G5  | phospholipase A2 group V [Source:HGNC Symbol;Acc:HGNC:9038]                                         |
| PPP3CB  | protein phosphatase 3 catalytic subunit beta [Source:HGNC Symbol;Acc:HGNC:9315]                     |
| QDPR    | quinoid dihydropteridine reductase [Source:HGNC Symbol;Acc:HGNC:9752]                               |
| RYBP    | RING1 and YY1 binding protein [Source:HGNC Symbol;Acc:HGNC:10480]                                   |
| SDHC    | succinate dehydrogenase complex subunit C [Source:HGNC Symbol;Acc:HGNC:10682]                       |
| SNRPF   | small nuclear ribonucleoprotein polypeptide F [Source:HGNC Symbol;Acc:HGNC:11162]                   |
| SSB     | Sjogren syndrome antigen B [Source:HGNC Symbol;Acc:HGNC:11316]                                      |
| SYT7    | synaptotagmin 7 [Source:HGNC Symbol;Acc:HGNC:11514]                                                 |
| USP25   | ubiquitin specific peptidase 25 [Source:HGNC Symbol;Acc:HGNC:12624]                                 |
| APBB1   | amyloid beta precursor protein binding family B member 1 [Source:HGNC Symbol;Acc:HGNC:581]          |
| ARFGEF3 | ARFGEF family member 3 [Source:HGNC Symbol;Acc:HGNC:21213]                                          |
| ARPC5L  | actin related protein 2/3 complex subunit 5 like [Source:HGNC Symbol;Acc:HGNC:23366]                |
| BCS1L   | BCS1 homolog, ubiquinol-cytochrome c reductase complex chaperone [Source:HGNC Symbol;Acc:HGNC:1020] |
| CCDC117 | coiled-coil domain containing 117 [Source:HGNC Symbol;Acc:HGNC:26599]                               |
| CCNK    | cyclin K [Source:HGNC Symbol;Acc:HGNC:1596]                                                         |
| CDC5L   | cell division cycle 5 like [Source:HGNC Symbol;Acc:HGNC:1743]                                       |
| CENPL   | centromere protein L [Source:HGNC Symbol;Acc:HGNC:17879]                                            |
| CREB3L4 | cAMP responsive element binding protein 3 like 4 [Source:HGNC Symbol;Acc:HGNC:18854]                |
| CRTC2   | CREB regulated transcription coactivator 2 [Source:HGNC Symbol;Acc:HGNC:27301]                      |
| DDX23   | DEAD-box helicase 23 [Source:HGNC Symbol;Acc:HGNC:17347]                                            |
| ERC2    | ELKS/RAB6-interacting/CAST family member 2 [Source:HGNC Symbol;Acc:HGNC:31922]                      |
| HAUS1   | HAUS augmin like complex subunit 1 [Source:HGNC Symbol;Acc:HGNC:25174]                              |
| IL18BP  | interleukin 18 binding protein [Source:HGNC Symbol;Acc:HGNC:5987]                                   |
| INPP4A  | inositol polyphosphate-4-phosphatase type I A [Source:HGNC Symbol;Acc:HGNC:6074]                    |
| KCNIP3  | potassium voltage-gated channel interacting protein 3 [Source:HGNC Symbol;Acc:HGNC:15523]           |
| MC1R    | melanocortin 1 receptor [Source:HGNC Symbol;Acc:HGNC:6929]                                          |
| MRPS18C | mitochondrial ribosomal protein S18C [Source:HGNC Symbol;Acc:HGNC:16633]                            |

|         |                                                                                                             |
|---------|-------------------------------------------------------------------------------------------------------------|
| MTNR1A  | melatonin receptor 1A [Source:HGNC Symbol;Acc:HGNC:7463]                                                    |
| NAIP    | NLR family apoptosis inhibitory protein [Source:HGNC Symbol;Acc:HGNC:7634]                                  |
| NDUFC1  | NADH:ubiquinone oxidoreductase subunit C1 [Source:HGNC Symbol;Acc:HGNC:7705]                                |
| NDUFS6  | NADH:ubiquinone oxidoreductase subunit S6 [Source:HGNC Symbol;Acc:HGNC:7713]                                |
| PRMT6   | protein arginine methyltransferase 6 [Source:HGNC Symbol;Acc:HGNC:18241]                                    |
| RASA2   | RAS p21 protein activator 2 [Source:HGNC Symbol;Acc:HGNC:9872]                                              |
| SEC61G  | Sec61 translocon gamma subunit [Source:HGNC Symbol;Acc:HGNC:18277]                                          |
| SNX24   | sorting nexin 24 [Source:HGNC Symbol;Acc:HGNC:21533]                                                        |
| TIMM44  | translocase of inner mitochondrial membrane 44 [Source:HGNC Symbol;Acc:HGNC:17316]                          |
| TXNL4B  | thioredoxin like 4B [Source:HGNC Symbol;Acc:HGNC:26041]                                                     |
| VPS29   | VPS29, retromer complex component [Source:HGNC Symbol;Acc:HGNC:14340]                                       |
| ZDHHC23 | zinc finger DHHC-type containing 23 [Source:HGNC Symbol;Acc:HGNC:28654]                                     |
| ZKSCAN1 | zinc finger with KRAB and SCAN domains 1 [Source:HGNC Symbol;Acc:HGNC:13101]                                |
| CAP1    | adenylate cyclase associated protein 1 [Source:HGNC Symbol;Acc:HGNC:20040]                                  |
| CD3G    | CD3g molecule [Source:HGNC Symbol;Acc:HGNC:1675]                                                            |
| CLSPN   | claspin [Source:HGNC Symbol;Acc:HGNC:19715]                                                                 |
| DRD5    | dopamine receptor D5 [Source:HGNC Symbol;Acc:HGNC:3026]                                                     |
| EIF3I   | eukaryotic translation initiation factor 3 subunit I [Source:HGNC Symbol;Acc:HGNC:3272]                     |
| F11     | coagulation factor XI [Source:HGNC Symbol;Acc:HGNC:3529]                                                    |
| FGGY    | FGGY carbohydrate kinase domain containing [Source:HGNC Symbol;Acc:HGNC:25610]                              |
| GLRA1   | glycine receptor alpha 1 [Source:HGNC Symbol;Acc:HGNC:4326]                                                 |
| NAA38   | N(alpha)-acetyltransferase 38, NatC auxiliary subunit [Source:HGNC Symbol;Acc:HGNC:28212]                   |
| NRN1    | neuritin 1 [Source:HGNC Symbol;Acc:HGNC:17972]                                                              |
| OLFML2A | olfactomedin like 2A [Source:HGNC Symbol;Acc:HGNC:27270]                                                    |
| PGRMC2  | progesterone receptor membrane component 2 [Source:HGNC Symbol;Acc:HGNC:16089]                              |
| PIK3AP1 | phosphoinositide-3-kinase adaptor protein 1 [Source:HGNC Symbol;Acc:HGNC:30034]                             |
| PITX2   | paired like homeodomain 2 [Source:HGNC Symbol;Acc:HGNC:9005]                                                |
| PRG4    | proteoglycan 4 [Source:HGNC Symbol;Acc:HGNC:9364]                                                           |
| PTPRU   | protein tyrosine phosphatase, receptor type U [Source:HGNC Symbol;Acc:HGNC:9683]                            |
| RFFL    | ring finger and FYVE-like domain containing E3 ubiquitin protein ligase [Source:HGNC Symbol;Acc:HGNC:24821] |
| RPL28   | ribosomal protein L28 [Source:HGNC Symbol;Acc:HGNC:10330]                                                   |
| RPN1    | ribophorin I [Source:HGNC Symbol;Acc:HGNC:10381]                                                            |
| RPS17   | ribosomal protein S17 [Source:HGNC Symbol;Acc:HGNC:10397]                                                   |
| RUNX1   | runt related transcription factor 1 [Source:HGNC Symbol;Acc:HGNC:10471]                                     |
| SFXN3   | sideroflexin 3 [Source:HGNC Symbol;Acc:HGNC:16087]                                                          |
| SLC29A2 | solute carrier family 29 member 2 [Source:HGNC Symbol;Acc:HGNC:11004]                                       |
| TFCP2L1 | transcription factor CP2-like 1 [Source:HGNC Symbol;Acc:HGNC:17925]                                         |

|          |                                                                                                  |
|----------|--------------------------------------------------------------------------------------------------|
| TNFSF15  | tumor necrosis factor superfamily member 15 [Source:HGNC Symbol;Acc:HGNC:11931]                  |
| UBE2J1   | ubiquitin conjugating enzyme E2 J1 [Source:HGNC Symbol;Acc:HGNC:17598]                           |
| YRDC     | yrnC N6-threonylcarbamoyltransferase domain containing [Source:HGNC Symbol;Acc:HGNC:28905]       |
| AP2A2    | adaptor related protein complex 2 alpha 2 subunit [Source:HGNC Symbol;Acc:HGNC:562]              |
| ARFGEF1  | ADP ribosylation factor guanine nucleotide exchange factor 1 [Source:HGNC Symbol;Acc:HGNC:15772] |
| ATE1     | arginyltransferase 1 [Source:HGNC Symbol;Acc:HGNC:782]                                           |
| BET1     | Bet1 golgi vesicular membrane trafficking protein [Source:HGNC Symbol;Acc:HGNC:14562]            |
| BTK      | Bruton tyrosine kinase [Source:HGNC Symbol;Acc:HGNC:1133]                                        |
| BYSL     | bystin like [Source:HGNC Symbol;Acc:HGNC:1157]                                                   |
| DCTN1    | dynactin subunit 1 [Source:HGNC Symbol;Acc:HGNC:2711]                                            |
| DERA     | deoxyribose-phosphate aldolase [Source:HGNC Symbol;Acc:HGNC:24269]                               |
| EHBP1L1  | EH domain binding protein 1 like 1 [Source:HGNC Symbol;Acc:HGNC:30682]                           |
| FBXO11   | F-box protein 11 [Source:HGNC Symbol;Acc:HGNC:13590]                                             |
| GAPVD1   | GTPase activating protein and VPS9 domains 1 [Source:HGNC Symbol;Acc:HGNC:23375]                 |
| IFT27    | intraflagellar transport 27 [Source:HGNC Symbol;Acc:HGNC:18626]                                  |
| LSAMP    | limbic system-associated membrane protein [Source:HGNC Symbol;Acc:HGNC:6705]                     |
| MATN3    | matrilin 3 [Source:HGNC Symbol;Acc:HGNC:6909]                                                    |
| MC2R     | melanocortin 2 receptor [Source:HGNC Symbol;Acc:HGNC:6930]                                       |
| MPHOSPH9 | M-phase phosphoprotein 9 [Source:HGNC Symbol;Acc:HGNC:7215]                                      |
| MRPS28   | mitochondrial ribosomal protein S28 [Source:HGNC Symbol;Acc:HGNC:14513]                          |
| MRPS7    | mitochondrial ribosomal protein S7 [Source:HGNC Symbol;Acc:HGNC:14499]                           |
| NMRK1    | nicotinamide riboside kinase 1 [Source:HGNC Symbol;Acc:HGNC:26057]                               |
| NOC2L    | NOC2 like nucleolar associated transcriptional repressor [Source:HGNC Symbol;Acc:HGNC:24517]     |
| PKN2     | protein kinase N2 [Source:HGNC Symbol;Acc:HGNC:9406]                                             |
| PLXDC1   | plexin domain containing 1 [Source:HGNC Symbol;Acc:HGNC:20945]                                   |
| PMPCB    | peptidase, mitochondrial processing beta subunit [Source:HGNC Symbol;Acc:HGNC:9119]              |
| RAB5B    | RAB5B, member RAS oncogene family [Source:HGNC Symbol;Acc:HGNC:9784]                             |
| RNF26    | ring finger protein 26 [Source:HGNC Symbol;Acc:HGNC:14646]                                       |
| SIL1     | SIL1 nucleotide exchange factor [Source:HGNC Symbol;Acc:HGNC:24624]                              |
| SNRPD3   | small nuclear ribonucleoprotein D3 polypeptide [Source:HGNC Symbol;Acc:HGNC:11160]               |
| TP53BP2  | tumor protein p53 binding protein 2 [Source:HGNC Symbol;Acc:HGNC:12000]                          |
| UBE2G2   | ubiquitin conjugating enzyme E2 G2 [Source:HGNC Symbol;Acc:HGNC:12483]                           |
| UQCRL1   | ubiquinol-cytochrome c reductase, complex III subunit X [Source:HGNC Symbol;Acc:HGNC:30863]      |
| CALCRL   | calcitonin receptor like receptor [Source:HGNC Symbol;Acc:HGNC:16709]                            |

|          |                                                                                                    |
|----------|----------------------------------------------------------------------------------------------------|
| CD302    | CD302 molecule [Source:HGNC Symbol;Acc:HGNC:30843]                                                 |
| FOLR2    | folate receptor beta [Source:HGNC Symbol;Acc:HGNC:3793]                                            |
| KRT80    | keratin 80 [Source:HGNC Symbol;Acc:HGNC:27056]                                                     |
| LRPAP1   | LDL receptor related protein associated protein 1 [Source:HGNC Symbol;Acc:HGNC:6701]               |
| MLC1     | megalencephalic leukoencephalopathy with subcortical cysts 1 [Source:HGNC Symbol;Acc:HGNC:17082]   |
| MRC2     | mannose receptor C type 2 [Source:HGNC Symbol;Acc:HGNC:16875]                                      |
| MST1     | macrophage stimulating 1 [Source:HGNC Symbol;Acc:HGNC:7380]                                        |
| PLD3     | phospholipase D family member 3 [Source:HGNC Symbol;Acc:HGNC:17158]                                |
| RPL14    | ribosomal protein L14 [Source:HGNC Symbol;Acc:HGNC:10305]                                          |
| SLC18A2  | solute carrier family 18 member A2 [Source:HGNC Symbol;Acc:HGNC:10935]                             |
| SLC25A15 | solute carrier family 25 member 15 [Source:HGNC Symbol;Acc:HGNC:10985]                             |
| TBC1D15  | TBC1 domain family member 15 [Source:HGNC Symbol;Acc:HGNC:25694]                                   |
| TRPA1    | transient receptor potential cation channel subfamily A member 1 [Source:HGNC Symbol;Acc:HGNC:497] |
| AFTPH    | aftiphilin [Source:HGNC Symbol;Acc:HGNC:25951]                                                     |
| AKAP8    | A-kinase anchoring protein 8 [Source:HGNC Symbol;Acc:HGNC:378]                                     |
| ALG14    | ALG14, UDP-N-acetylglucosaminyltransferase subunit [Source:HGNC Symbol;Acc:HGNC:28287]             |
| AP3M1    | adaptor related protein complex 3 mu 1 subunit [Source:HGNC Symbol;Acc:HGNC:569]                   |
| BRCC3    | BRCA1/BRCA2-containing complex subunit 3 [Source:HGNC Symbol;Acc:HGNC:24185]                       |
| FANCL    | Fanconi anemia complementation group L [Source:HGNC Symbol;Acc:HGNC:20748]                         |
| MARK2    | microtubule affinity regulating kinase 2 [Source:HGNC Symbol;Acc:HGNC:3332]                        |
| MBD3     | methyl-CpG binding domain protein 3 [Source:HGNC Symbol;Acc:HGNC:6918]                             |
| MCEE     | methylmalonyl-CoA epimerase [Source:HGNC Symbol;Acc:HGNC:16732]                                    |
| MORC3    | MORC family CW-type zinc finger 3 [Source:HGNC Symbol;Acc:HGNC:23572]                              |
| MRPL49   | mitochondrial ribosomal protein L49 [Source:HGNC Symbol;Acc:HGNC:1176]                             |
| MTFP1    | mitochondrial fission process 1 [Source:HGNC Symbol;Acc:HGNC:26945]                                |
| MTMR7    | myotubularin related protein 7 [Source:HGNC Symbol;Acc:HGNC:7454]                                  |
| MYO18A   | myosin XVIIIa [Source:HGNC Symbol;Acc:HGNC:31104]                                                  |
| ORMDL3   | ORMDL sphingolipid biosynthesis regulator 3 [Source:HGNC Symbol;Acc:HGNC:16038]                    |
| PBRM1    | polybromo 1 [Source:HGNC Symbol;Acc:HGNC:30064]                                                    |
| PHF5A    | PHD finger protein 5A [Source:HGNC Symbol;Acc:HGNC:18000]                                          |
| PTRH2    | peptidyl-tRNA hydrolase 2 [Source:HGNC Symbol;Acc:HGNC:24265]                                      |
| PUF60    | poly(U) binding splicing factor 60KDa [Source:HGNC Symbol;Acc:HGNC:17042]                          |
| RANBP2   | RAN binding protein 2 [Source:HGNC Symbol;Acc:HGNC:9848]                                           |
| RAP2A    | RAP2A, member of RAS oncogene family [Source:HGNC Symbol;Acc:HGNC:9861]                            |
| SCAP     | SREBF chaperone [Source:HGNC Symbol;Acc:HGNC:30634]                                                |
| SPIN4    | spindlin family member 4 [Source:HGNC Symbol;Acc:HGNC:27040]                                       |
| TGIF2    | TGFB induced factor homeobox 2 [Source:HGNC Symbol;Acc:HGNC:15764]                                 |
| THOC1    | THO complex 1 [Source:HGNC Symbol;Acc:HGNC:19070]                                                  |

|          |                                                                                               |
|----------|-----------------------------------------------------------------------------------------------|
| ULBP1    | UL16 binding protein 1 [Source:HGNC Symbol;Acc:HGNC:14893]                                    |
| YIPF5    | Yip1 domain family member 5 [Source:HGNC Symbol;Acc:HGNC:24877]                               |
| ZFP91    | ZFP91 zinc finger protein [Source:HGNC Symbol;Acc:HGNC:14983]                                 |
| ANGPTL3  | angiopoietin like 3 [Source:HGNC Symbol;Acc:HGNC:491]                                         |
| BACH2    | BTB domain and CNC homolog 2 [Source:HGNC Symbol;Acc:HGNC:14078]                              |
| BPTF     | bromodomain PHD finger transcription factor [Source:HGNC Symbol;Acc:HGNC:3581]                |
| CAPN6    | calpain 6 [Source:HGNC Symbol;Acc:HGNC:1483]                                                  |
| COX15    | COX15 cytochrome c oxidase assembly homolog [Source:HGNC Symbol;Acc:HGNC:2263]                |
| EFEMP2   | EGF containing fibulin like extracellular matrix protein 2 [Source:HGNC Symbol;Acc:HGNC:3219] |
| FGF23    | fibroblast growth factor 23 [Source:HGNC Symbol;Acc:HGNC:3680]                                |
| GALNT6   | polypeptide N-acetylgalactosaminyltransferase 6 [Source:HGNC Symbol;Acc:HGNC:4128]            |
| GLRX3    | glutaredoxin 3 [Source:HGNC Symbol;Acc:HGNC:15987]                                            |
| HEBP2    | heme binding protein 2 [Source:HGNC Symbol;Acc:HGNC:15716]                                    |
| HES5     | hes family bHLH transcription factor 5 [Source:HGNC Symbol;Acc:HGNC:19764]                    |
| IBSP     | integrin binding sialoprotein [Source:HGNC Symbol;Acc:HGNC:5341]                              |
| PKDCC    | protein kinase domain containing, cytoplasmic [Source:HGNC Symbol;Acc:HGNC:25123]             |
| PRKCSH   | protein kinase C substrate 80K-H [Source:HGNC Symbol;Acc:HGNC:9411]                           |
| PTP4A1   | protein tyrosine phosphatase type IVA, member 1 [Source:HGNC Symbol;Acc:HGNC:9634]            |
| RAPGEF3  | Rap guanine nucleotide exchange factor 3 [Source:HGNC Symbol;Acc:HGNC:16629]                  |
| RPL4     | ribosomal protein L4 [Source:HGNC Symbol;Acc:HGNC:10353]                                      |
| RPS12    | ribosomal protein S12 [Source:HGNC Symbol;Acc:HGNC:10385]                                     |
| SCGB1A1  | secretoglobin family 1A member 1 [Source:HGNC Symbol;Acc:HGNC:12523]                          |
| ADGRD1   | adhesion G protein-coupled receptor D1 [Source:HGNC Symbol;Acc:HGNC:19893]                    |
| BAG6     | BCL2 associated athanogene 6 [Source:HGNC Symbol;Acc:HGNC:13919]                              |
| CDC73    | cell division cycle 73 [Source:HGNC Symbol;Acc:HGNC:16783]                                    |
| CDK5RAP3 | CDK5 regulatory subunit associated protein 3 [Source:HGNC Symbol;Acc:HGNC:18673]              |
| CHP1     | calcineurin like EF-hand protein 1 [Source:HGNC Symbol;Acc:HGNC:17433]                        |
| ETNK2    | ethanolamine kinase 2 [Source:HGNC Symbol;Acc:HGNC:25575]                                     |
| FAM110B  | family with sequence similarity 110 member B [Source:HGNC Symbol;Acc:HGNC:28587]              |
| FKBP3    | FK506 binding protein 3 [Source:HGNC Symbol;Acc:HGNC:3719]                                    |
| GNL2     | G protein nucleolar 2 [Source:HGNC Symbol;Acc:HGNC:29925]                                     |
| GPAT4    | glycerol-3-phosphate acyltransferase 4 [Source:HGNC Symbol;Acc:HGNC:20880]                    |
| GRHL3    | grainyhead like transcription factor 3 [Source:HGNC Symbol;Acc:HGNC:25839]                    |
| GYPA     | glycophorin A (MNS blood group) [Source:HGNC Symbol;Acc:HGNC:4702]                            |
| HIPK1    | homeodomain interacting protein kinase 1 [Source:HGNC Symbol;Acc:HGNC:19006]                  |
| MRPL3    | mitochondrial ribosomal protein L3 [Source:HGNC Symbol;Acc:HGNC:10379]                        |
| MRPS27   | mitochondrial ribosomal protein S27 [Source:HGNC Symbol;Acc:HGNC:14512]                       |

|         |                                                                                                                                        |
|---------|----------------------------------------------------------------------------------------------------------------------------------------|
| NDUFB4  | NADH:ubiquinone oxidoreductase subunit B4 [Source:HGNC Symbol;Acc:HGNC:7699]                                                           |
| NDUFB9  | NADH:ubiquinone oxidoreductase subunit B9 [Source:HGNC Symbol;Acc:HGNC:7704]                                                           |
| NFS1    | NFS1 cysteine desulfurase [Source:HGNC Symbol;Acc:HGNC:15910]                                                                          |
| NKX2-1  | NK2 homeobox 1 [Source:HGNC Symbol;Acc:HGNC:11825]                                                                                     |
| NLRP12  | NLR family pyrin domain containing 12 [Source:HGNC Symbol;Acc:HGNC:22938]                                                              |
| NOD1    | nucleotide binding oligomerization domain containing 1 [Source:HGNC Symbol;Acc:HGNC:16390]                                             |
| OGFR    | opioid growth factor receptor [Source:HGNC Symbol;Acc:HGNC:15768]                                                                      |
| POLD2   | polymerase (DNA) delta 2, accessory subunit [Source:HGNC Symbol;Acc:HGNC:9176]                                                         |
| SMC6    | structural maintenance of chromosomes 6 [Source:HGNC Symbol;Acc:HGNC:20466]                                                            |
| SNRPA1  | small nuclear ribonucleoprotein polypeptide A' [Source:HGNC Symbol;Acc:HGNC:11152]                                                     |
| SNRPD2  | small nuclear ribonucleoprotein D2 polypeptide [Source:HGNC Symbol;Acc:HGNC:11159]                                                     |
| SPAG1   | sperm associated antigen 1 [Source:HGNC Symbol;Acc:HGNC:11212]                                                                         |
| TOR1B   | torsin family 1 member B [Source:HGNC Symbol;Acc:HGNC:11995]                                                                           |
| TSPAN1  | tetraspanin 1 [Source:HGNC Symbol;Acc:HGNC:20657]                                                                                      |
| UST     | uronyl 2-sulfotransferase [Source:HGNC Symbol;Acc:HGNC:17223]                                                                          |
| YARS2   | tyrosyl-tRNA synthetase 2 [Source:HGNC Symbol;Acc:HGNC:24249]                                                                          |
| ZNF292  | zinc finger protein 292 [Source:HGNC Symbol;Acc:HGNC:18410]                                                                            |
| DEDD2   | death effector domain containing 2 [Source:HGNC Symbol;Acc:HGNC:24450]                                                                 |
| HMGCL   | 3-hydroxymethyl-3-methylglutaryl-CoA lyase [Source:HGNC Symbol;Acc:HGNC:5005]                                                          |
| PKP4    | plakophilin 4 [Source:HGNC Symbol;Acc:HGNC:9026]                                                                                       |
| RPS27A  | ribosomal protein S27a [Source:HGNC Symbol;Acc:HGNC:10417]                                                                             |
| SLC44A4 | solute carrier family 44 member 4 [Source:HGNC Symbol;Acc:HGNC:13941]                                                                  |
| TNRC6B  | trinucleotide repeat containing 6B [Source:HGNC Symbol;Acc:HGNC:29190]                                                                 |
| AMMECR1 | Alport syndrome, mental retardation, midface hypoplasia and elliptocytosis chromosomal region gene 1 [Source:HGNC Symbol;Acc:HGNC:467] |
| APPBP2  | amyloid beta precursor protein binding protein 2 [Source:HGNC Symbol;Acc:HGNC:622]                                                     |
| ARID4A  | AT-rich interaction domain 4A [Source:HGNC Symbol;Acc:HGNC:9885]                                                                       |
| ARL3    | ADP ribosylation factor like GTPase 3 [Source:HGNC Symbol;Acc:HGNC:694]                                                                |
| BNIP2   | BCL2/adenovirus E1B 19kDa interacting protein 2 [Source:HGNC Symbol;Acc:HGNC:1083]                                                     |
| CD3E    | CD3e molecule [Source:HGNC Symbol;Acc:HGNC:1674]                                                                                       |
| CDCA4   | cell division cycle associated 4 [Source:HGNC Symbol;Acc:HGNC:14625]                                                                   |
| CEP128  | centrosomal protein 128 [Source:HGNC Symbol;Acc:HGNC:20359]                                                                            |
| CEP152  | centrosomal protein 152 [Source:HGNC Symbol;Acc:HGNC:29298]                                                                            |
| COQ7    | coenzyme Q7, hydroxylase [Source:HGNC Symbol;Acc:HGNC:2244]                                                                            |
| DCPS    | decapping enzyme, scavenger [Source:HGNC Symbol;Acc:HGNC:29812]                                                                        |
| DCX     | doublecortin [Source:HGNC Symbol;Acc:HGNC:2714]                                                                                        |
| DERL1   | derlin 1 [Source:HGNC Symbol;Acc:HGNC:28454]                                                                                           |
| DHX15   | DEAH-box helicase 15 [Source:HGNC Symbol;Acc:HGNC:2738]                                                                                |

|         |                                                                                                                           |
|---------|---------------------------------------------------------------------------------------------------------------------------|
| DNA2    | DNA replication helicase/nuclease 2 [Source:HGNC Symbol;Acc:HGNC:2939]                                                    |
| FITM2   | fat storage inducing transmembrane protein 2 [Source:HGNC Symbol;Acc:HGNC:16135]                                          |
| IK      | IK cytokine, down-regulator of HLA II [Source:HGNC Symbol;Acc:HGNC:5958]                                                  |
| ILF2    | interleukin enhancer binding factor 2 [Source:HGNC Symbol;Acc:HGNC:6037]                                                  |
| INTS7   | integrator complex subunit 7 [Source:HGNC Symbol;Acc:HGNC:24484]                                                          |
| L2HGDH  | L-2-hydroxyglutarate dehydrogenase [Source:HGNC Symbol;Acc:HGNC:20499]                                                    |
| LCOR    | ligand dependent nuclear receptor corepressor [Source:HGNC Symbol;Acc:HGNC:29503]                                         |
| LSM4    | LSM4 homolog, U6 small nuclear RNA and mRNA degradation associated [Source:HGNC Symbol;Acc:HGNC:17259]                    |
| MAT2B   | methionine adenosyltransferase 2B [Source:HGNC Symbol;Acc:HGNC:6905]                                                      |
| MBTPS1  | membrane bound transcription factor peptidase, site 1 [Source:HGNC Symbol;Acc:HGNC:15456]                                 |
| MGAT4A  | mannosyl (alpha-1,3-)-glycoprotein beta-1,4-N-acetylglucosaminyltransferase, isozyme A [Source:HGNC Symbol;Acc:HGNC:7047] |
| MIA     | melanoma inhibitory activity [Source:HGNC Symbol;Acc:HGNC:7076]                                                           |
| NDUFA6  | NADH:ubiquinone oxidoreductase subunit A6 [Source:HGNC Symbol;Acc:HGNC:7690]                                              |
| NOP16   | NOP16 nucleolar protein [Source:HGNC Symbol;Acc:HGNC:26934]                                                               |
| NUCB1   | nucleobindin 1 [Source:HGNC Symbol;Acc:HGNC:8043]                                                                         |
| PDCD2   | programmed cell death 2 [Source:HGNC Symbol;Acc:HGNC:8762]                                                                |
| PDXP    | pyridoxal phosphatase [Source:HGNC Symbol;Acc:HGNC:30259]                                                                 |
| PNPO    | pyridoxamine 5'-phosphate oxidase [Source:HGNC Symbol;Acc:HGNC:30260]                                                     |
| PYROXD2 | pyridine nucleotide-disulphide oxidoreductase domain 2 [Source:HGNC Symbol;Acc:HGNC:23517]                                |
| RAB10   | RAB10, member RAS oncogene family [Source:HGNC Symbol;Acc:HGNC:9759]                                                      |
| RAB11B  | RAB11B, member RAS oncogene family [Source:HGNC Symbol;Acc:HGNC:9761]                                                     |
| RAB18   | RAB18, member RAS oncogene family [Source:HGNC Symbol;Acc:HGNC:14244]                                                     |
| RAB2A   | RAB2A, member RAS oncogene family [Source:HGNC Symbol;Acc:HGNC:9763]                                                      |
| RAB8A   | RAB8A, member RAS oncogene family [Source:HGNC Symbol;Acc:HGNC:7007]                                                      |
| RBM15   | RNA binding motif protein 15 [Source:HGNC Symbol;Acc:HGNC:14959]                                                          |
| RMI2    | RecQ mediated genome instability 2 [Source:HGNC Symbol;Acc:HGNC:28349]                                                    |
| RNF144A | ring finger protein 144A [Source:HGNC Symbol;Acc:HGNC:20457]                                                              |
| RRP1B   | ribosomal RNA processing 1B [Source:HGNC Symbol;Acc:HGNC:23818]                                                           |
| RSRC1   | arginine and serine rich coiled-coil 1 [Source:HGNC Symbol;Acc:HGNC:24152]                                                |
| SDHD    | succinate dehydrogenase complex subunit D [Source:HGNC Symbol;Acc:HGNC:10683]                                             |
| SEC11C  | SEC11 homolog C, signal peptidase complex subunit [Source:HGNC Symbol;Acc:HGNC:23400]                                     |
| SENP7   | SUMO1/sentrin specific peptidase 7 [Source:HGNC Symbol;Acc:HGNC:30402]                                                    |
| SF3A1   | splicing factor 3a subunit 1 [Source:HGNC Symbol;Acc:HGNC:10765]                                                          |
| SGCB    | sarcoglycan beta [Source:HGNC Symbol;Acc:HGNC:10806]                                                                      |
| SH3BGR2 | SH3 domain binding glutamate rich protein like 2 [Source:HGNC Symbol;Acc:HGNC:15567]                                      |

|          |                                                                                                                |
|----------|----------------------------------------------------------------------------------------------------------------|
| SKA3     | spindle and kinetochore associated complex subunit 3 [Source:HGNC Symbol;Acc:HGNC:20262]                       |
| SLC25A11 | solute carrier family 25 member 11 [Source:HGNC Symbol;Acc:HGNC:10981]                                         |
| SOX3     | SRY-box 3 [Source:HGNC Symbol;Acc:HGNC:11199]                                                                  |
| SPEN     | spen family transcriptional repressor [Source:HGNC Symbol;Acc:HGNC:17575]                                      |
| STRN3    | striatin 3 [Source:HGNC Symbol;Acc:HGNC:15720]                                                                 |
| TAF1     | TATA-box binding protein associated factor 1 [Source:HGNC Symbol;Acc:HGNC:11535]                               |
| TEX264   | testis expressed 264 [Source:HGNC Symbol;Acc:HGNC:30247]                                                       |
| THRAP3   | thyroid hormone receptor associated protein 3 [Source:HGNC Symbol;Acc:HGNC:22964]                              |
| TMEM107  | transmembrane protein 107 [Source:HGNC Symbol;Acc:HGNC:28128]                                                  |
| AMOTL2   | angiomotin like 2 [Source:HGNC Symbol;Acc:HGNC:17812]                                                          |
| ASGR1    | asialoglycoprotein receptor 1 [Source:HGNC Symbol;Acc:HGNC:742]                                                |
| AVPI1    | arginine vasopressin induced 1 [Source:HGNC Symbol;Acc:HGNC:30898]                                             |
| CLDN4    | claudin 4 [Source:HGNC Symbol;Acc:HGNC:2046]                                                                   |
| HYAL1    | hyaluronoglucosaminidase 1 [Source:HGNC Symbol;Acc:HGNC:5320]                                                  |
| KIFC3    | kinesin family member C3 [Source:HGNC Symbol;Acc:HGNC:6326]                                                    |
| MGAT2    | mannosyl (alpha-1,6-)-glycoprotein beta-1,2-N-acetylglucosaminyltransferase [Source:HGNC Symbol;Acc:HGNC:7045] |
| MPEG1    | macrophage expressed 1 [Source:HGNC Symbol;Acc:HGNC:29619]                                                     |
| PIGR     | polymeric immunoglobulin receptor [Source:HGNC Symbol;Acc:HGNC:8968]                                           |
| PPP2R1B  | protein phosphatase 2 scaffold subunit Abeta [Source:HGNC Symbol;Acc:HGNC:9303]                                |
| PZP      | PZP, alpha-2-macroglobulin like [Source:HGNC Symbol;Acc:HGNC:9750]                                             |
| RAPGEF2  | Rap guanine nucleotide exchange factor 2 [Source:HGNC Symbol;Acc:HGNC:16854]                                   |
| RHBG     | Rh family B glycoprotein (gene/pseudogene) [Source:HGNC Symbol;Acc:HGNC:14572]                                 |
| XRCC4    | X-ray repair cross complementing 4 [Source:HGNC Symbol;Acc:HGNC:12831]                                         |
| ABHD11   | abhydrolase domain containing 11 [Source:HGNC Symbol;Acc:HGNC:16407]                                           |
| ADCY4    | adenylate cyclase 4 [Source:HGNC Symbol;Acc:HGNC:235]                                                          |
| BBS2     | Bardet-Biedl syndrome 2 [Source:HGNC Symbol;Acc:HGNC:967]                                                      |
| C15orf48 | chromosome 15 open reading frame 48 [Source:HGNC Symbol;Acc:HGNC:29898]                                        |
| CCKAR    | cholecystokinin A receptor [Source:HGNC Symbol;Acc:HGNC:1570]                                                  |
| CDK5RAP2 | CDK5 regulatory subunit associated protein 2 [Source:HGNC Symbol;Acc:HGNC:18672]                               |
| DONSON   | downstream neighbor of SON [Source:HGNC Symbol;Acc:HGNC:2993]                                                  |
| EFTUD2   | elongation factor Tu GTP binding domain containing 2 [Source:HGNC Symbol;Acc:HGNC:30858]                       |
| FAM111B  | family with sequence similarity 111 member B [Source:HGNC Symbol;Acc:HGNC:24200]                               |
| FAM171B  | family with sequence similarity 171 member B [Source:HGNC Symbol;Acc:HGNC:29412]                               |
| IGSF6    | immunoglobulin superfamily member 6 [Source:HGNC Symbol;Acc:HGNC:5953]                                         |
| IPO9     | importin 9 [Source:HGNC Symbol;Acc:HGNC:19425]                                                                 |
| MED13    | mediator complex subunit 13 [Source:HGNC Symbol;Acc:HGNC:22474]                                                |



|          |                                                                                           |
|----------|-------------------------------------------------------------------------------------------|
| MFSD4A   | major facilitator superfamily domain containing 4A [Source:HGNC Symbol;Acc:HGNC:25433]    |
| MLYCD    | malonyl-CoA decarboxylase [Source:HGNC Symbol;Acc:HGNC:7150]                              |
| MTFR2    | mitochondrial fission regulator 2 [Source:HGNC Symbol;Acc:HGNC:21115]                     |
| NCOA6    | nuclear receptor coactivator 6 [Source:HGNC Symbol;Acc:HGNC:15936]                        |
| NRM      | nurim (nuclear envelope membrane protein) [Source:HGNC Symbol;Acc:HGNC:8003]              |
| SNRNP25  | small nuclear ribonucleoprotein U11/U12 subunit 25 [Source:HGNC Symbol;Acc:HGNC:14161]    |
| SSRP1    | structure specific recognition protein 1 [Source:HGNC Symbol;Acc:HGNC:11327]              |
| SURF4    | surfeit 4 [Source:HGNC Symbol;Acc:HGNC:11476]                                             |
| TBX1     | T-box 1 [Source:HGNC Symbol;Acc:HGNC:11592]                                               |
| TLK1     | tousled like kinase 1 [Source:HGNC Symbol;Acc:HGNC:11841]                                 |
| TMEM135  | transmembrane protein 135 [Source:HGNC Symbol;Acc:HGNC:26167]                             |
| TMEM64   | transmembrane protein 64 [Source:HGNC Symbol;Acc:HGNC:25441]                              |
| VAPA     | VAMP associated protein A [Source:HGNC Symbol;Acc:HGNC:12648]                             |
| CHRD1    | chordin-like 1 [Source:HGNC Symbol;Acc:HGNC:29861]                                        |
| EEF1B2   | eukaryotic translation elongation factor 1 beta 2 [Source:HGNC Symbol;Acc:HGNC:3208]      |
| HINT1    | histidine triad nucleotide binding protein 1 [Source:HGNC Symbol;Acc:HGNC:4912]           |
| KCNK2    | potassium two pore domain channel subfamily K member 2 [Source:HGNC Symbol;Acc:HGNC:6277] |
| KRT16    | keratin 16 [Source:HGNC Symbol;Acc:HGNC:6423]                                             |
| MMP11    | matrix metalloproteinase 11 [Source:HGNC Symbol;Acc:HGNC:7157]                            |
| PELO     | pelota homolog (Drosophila) [Source:HGNC Symbol;Acc:HGNC:8829]                            |
| PHLDB1   | pleckstrin homology like domain family B member 1 [Source:HGNC Symbol;Acc:HGNC:23697]     |
| SLC22A12 | solute carrier family 22 member 12 [Source:HGNC Symbol;Acc:HGNC:17989]                    |
| SPTBN2   | spectrin beta, non-erythrocytic 2 [Source:HGNC Symbol;Acc:HGNC:11276]                     |
| SSBP2    | single stranded DNA binding protein 2 [Source:HGNC Symbol;Acc:HGNC:15831]                 |
| UCHL1    | ubiquitin C-terminal hydrolase L1 [Source:HGNC Symbol;Acc:HGNC:12513]                     |
| ACYP1    | acylphosphatase 1 [Source:HGNC Symbol;Acc:HGNC:179]                                       |
| AGPS     | alkylglycerone phosphate synthase [Source:HGNC Symbol;Acc:HGNC:327]                       |
| AGTRAP   | angiotensin II receptor associated protein [Source:HGNC Symbol;Acc:HGNC:13539]            |
| ARPP21   | cAMP regulated phosphoprotein 21 [Source:HGNC Symbol;Acc:HGNC:16968]                      |
| COMMD3   | COMM domain containing 3 [Source:HGNC Symbol;Acc:HGNC:23332]                              |
| DMXL2    | Dmx like 2 [Source:HGNC Symbol;Acc:HGNC:2938]                                             |
| HAS1     | hyaluronan synthase 1 [Source:HGNC Symbol;Acc:HGNC:4818]                                  |
| HAX1     | HCLS1 associated protein X-1 [Source:HGNC Symbol;Acc:HGNC:16915]                          |
| IFT122   | intraflagellar transport 122 [Source:HGNC Symbol;Acc:HGNC:13556]                          |
| IRF2BPL  | interferon regulatory factor 2 binding protein like [Source:HGNC Symbol;Acc:HGNC:14282]   |
| MRPL19   | mitochondrial ribosomal protein L19 [Source:HGNC Symbol;Acc:HGNC:14052]                   |
| MRPL33   | mitochondrial ribosomal protein L33 [Source:HGNC Symbol;Acc:HGNC:14487]                   |

|         |                                                                                                        |
|---------|--------------------------------------------------------------------------------------------------------|
| MTMR4   | myotubularin related protein 4 [Source:HGNC Symbol;Acc:HGNC:7452]                                      |
| PHF14   | PHD finger protein 14 [Source:HGNC Symbol;Acc:HGNC:22203]                                              |
| PHTF1   | putative homeodomain transcription factor 1 [Source:HGNC Symbol;Acc:HGNC:8939]                         |
| PRRC2A  | proline rich coiled-coil 2A [Source:HGNC Symbol;Acc:HGNC:13918]                                        |
| RAB43   | RAB43, member RAS oncogene family [Source:HGNC Symbol;Acc:HGNC:19983]                                  |
| RBM19   | RNA binding motif protein 19 [Source:HGNC Symbol;Acc:HGNC:29098]                                       |
| SALL4   | spalt like transcription factor 4 [Source:HGNC Symbol;Acc:HGNC:15924]                                  |
| STK38L  | serine/threonine kinase 38 like [Source:HGNC Symbol;Acc:HGNC:17848]                                    |
| THSD4   | thrombospondin type 1 domain containing 4 [Source:HGNC Symbol;Acc:HGNC:25835]                          |
| ZC2HC1A | zinc finger C2HC-type containing 1A [Source:HGNC Symbol;Acc:HGNC:24277]                                |
| ACAD11  | acyl-CoA dehydrogenase family member 11 [Source:HGNC Symbol;Acc:HGNC:30211]                            |
| ADGRG2  | adhesion G protein-coupled receptor G2 [Source:HGNC Symbol;Acc:HGNC:4516]                              |
| CAMK2G  | calcium/calmodulin dependent protein kinase II gamma [Source:HGNC Symbol;Acc:HGNC:1463]                |
| CELA1   | chymotrypsin like elastase family member 1 [Source:HGNC Symbol;Acc:HGNC:3308]                          |
| CLIP4   | CAP-Gly domain containing linker protein family member 4 [Source:HGNC Symbol;Acc:HGNC:26108]           |
| CPN1    | carboxypeptidase N subunit 1 [Source:HGNC Symbol;Acc:HGNC:2312]                                        |
| MT-CYB  | mitochondrially encoded cytochrome b [Source:HGNC Symbol;Acc:HGNC:7427]                                |
| DLX5    | distal-less homeobox 5 [Source:HGNC Symbol;Acc:HGNC:2918]                                              |
| DPEP1   | dipeptidase 1 (renal) [Source:HGNC Symbol;Acc:HGNC:3002]                                               |
| EDN3    | endothelin 3 [Source:HGNC Symbol;Acc:HGNC:3178]                                                        |
| F12     | coagulation factor XII [Source:HGNC Symbol;Acc:HGNC:3530]                                              |
| FADS3   | fatty acid desaturase 3 [Source:HGNC Symbol;Acc:HGNC:3576]                                             |
| GCGR    | glucagon receptor [Source:HGNC Symbol;Acc:HGNC:4192]                                                   |
| HRH2    | histamine receptor H2 [Source:HGNC Symbol;Acc:HGNC:5183]                                               |
| IRAK3   | interleukin 1 receptor associated kinase 3 [Source:HGNC Symbol;Acc:HGNC:17020]                         |
| ITIH2   | inter-alpha-trypsin inhibitor heavy chain 2 [Source:HGNC Symbol;Acc:HGNC:6167]                         |
| MAGI1   | membrane associated guanylate kinase, WW and PDZ domain containing 1 [Source:HGNC Symbol;Acc:HGNC:946] |
| NRGN    | neurogranin [Source:HGNC Symbol;Acc:HGNC:8000]                                                         |
| ONECUT1 | one cut homeobox 1 [Source:HGNC Symbol;Acc:HGNC:8138]                                                  |
| PIR     | pirin [Source:HGNC Symbol;Acc:HGNC:30048]                                                              |
| SATB1   | SATB homeobox 1 [Source:HGNC Symbol;Acc:HGNC:10541]                                                    |
| SULT2B1 | sulfotransferase family 2B member 1 [Source:HGNC Symbol;Acc:HGNC:11459]                                |
| AHCTF1  | AT-hook containing transcription factor 1 [Source:HGNC Symbol;Acc:HGNC:24618]                          |
| AP3D1   | adaptor related protein complex 3 delta 1 subunit [Source:HGNC Symbol;Acc:HGNC:568]                    |
| BUB3    | BUB3, mitotic checkpoint protein [Source:HGNC Symbol;Acc:HGNC:1151]                                    |
| CERS6   | ceramide synthase 6 [Source:HGNC Symbol;Acc:HGNC:23826]                                                |
| CSNK1G1 | casein kinase 1 gamma 1 [Source:HGNC Symbol;Acc:HGNC:2454]                                             |
| CTPS1   | CTP synthase 1 [Source:HGNC Symbol;Acc:HGNC:2519]                                                      |

|          |                                                                                              |
|----------|----------------------------------------------------------------------------------------------|
| FAM110C  | family with sequence similarity 110 member C [Source:HGNC Symbol;Acc:HGNC:33340]             |
| GHRH     | growth hormone releasing hormone [Source:HGNC Symbol;Acc:HGNC:4265]                          |
| GPD1L    | glycerol-3-phosphate dehydrogenase 1-like [Source:HGNC Symbol;Acc:HGNC:28956]                |
| GRPEL2   | GrpE like 2, mitochondrial [Source:HGNC Symbol;Acc:HGNC:21060]                               |
| HACD2    | 3-hydroxyacyl-CoA dehydratase 2 [Source:HGNC Symbol;Acc:HGNC:9640]                           |
| KAT5     | lysine acetyltransferase 5 [Source:HGNC Symbol;Acc:HGNC:5275]                                |
| MAP1A    | microtubule associated protein 1A [Source:HGNC Symbol;Acc:HGNC:6835]                         |
| MICB     | MHC class I polypeptide-related sequence B [Source:HGNC Symbol;Acc:HGNC:7091]                |
| MTPN     | myotrophin [Source:HGNC Symbol;Acc:HGNC:15667]                                               |
| N4BP1    | NEDD4 binding protein 1 [Source:HGNC Symbol;Acc:HGNC:29850]                                  |
| NDC1     | NDC1 transmembrane nucleoporin [Source:HGNC Symbol;Acc:HGNC:25525]                           |
| PDSS1    | prenyl (decaprenyl) diphosphate synthase, subunit 1 [Source:HGNC Symbol;Acc:HGNC:17759]      |
| PTGES2   | prostaglandin E synthase 2 [Source:HGNC Symbol;Acc:HGNC:17822]                               |
| PTPRA    | protein tyrosine phosphatase, receptor type A [Source:HGNC Symbol;Acc:HGNC:9664]             |
| RHOJ     | ras homolog family member J [Source:HGNC Symbol;Acc:HGNC:688]                                |
| RPL19    | ribosomal protein L19 [Source:HGNC Symbol;Acc:HGNC:10312]                                    |
| RPL39    | ribosomal protein L39 [Source:HGNC Symbol;Acc:HGNC:10350]                                    |
| SAR1A    | secretion associated Ras related GTPase 1A [Source:HGNC Symbol;Acc:HGNC:10534]               |
| SH3PXD2B | SH3 and PX domains 2B [Source:HGNC Symbol;Acc:HGNC:29242]                                    |
| SNRPE    | small nuclear ribonucleoprotein polypeptide E [Source:HGNC Symbol;Acc:HGNC:11161]            |
| SRGAP3   | SLIT-ROBO Rho GTPase activating protein 3 [Source:HGNC Symbol;Acc:HGNC:19744]                |
| SURF1    | surfeit 1 [Source:HGNC Symbol;Acc:HGNC:11474]                                                |
| TBC1D5   | TBC1 domain family member 5 [Source:HGNC Symbol;Acc:HGNC:19166]                              |
| TIMM13   | translocase of inner mitochondrial membrane 13 [Source:HGNC Symbol;Acc:HGNC:11816]           |
| TMEM117  | transmembrane protein 117 [Source:HGNC Symbol;Acc:HGNC:25308]                                |
| TMEM33   | transmembrane protein 33 [Source:HGNC Symbol;Acc:HGNC:25541]                                 |
| COX6C    | cytochrome c oxidase subunit 6C [Source:HGNC Symbol;Acc:HGNC:2285]                           |
| CRABP1   | cellular retinoic acid binding protein 1 [Source:HGNC Symbol;Acc:HGNC:2338]                  |
| EYA1     | EYA transcriptional coactivator and phosphatase 1 [Source:HGNC Symbol;Acc:HGNC:3519]         |
| FXVD6    | FXVD domain containing ion transport regulator 6 [Source:HGNC Symbol;Acc:HGNC:4030]          |
| KIF18B   | kinesin family member 18B [Source:HGNC Symbol;Acc:HGNC:27102]                                |
| MCCC2    | methylcrotonoyl-CoA carboxylase 2 [Source:HGNC Symbol;Acc:HGNC:6937]                         |
| PKMYT1   | protein kinase, membrane associated tyrosine/threonine 1 [Source:HGNC Symbol;Acc:HGNC:29650] |
| SLC20A2  | solute carrier family 20 member 2 [Source:HGNC Symbol;Acc:HGNC:10947]                        |
| ZMIZ1    | zinc finger MIZ-type containing 1 [Source:HGNC Symbol;Acc:HGNC:16493]                        |
| API5     | apoptosis inhibitor 5 [Source:HGNC Symbol;Acc:HGNC:594]                                      |

|          |                                                                                                 |
|----------|-------------------------------------------------------------------------------------------------|
| ARL8B    | ADP ribosylation factor like GTPase 8B [Source:HGNC Symbol;Acc:HGNC:25564]                      |
| ARSG     | arylsulfatase G [Source:HGNC Symbol;Acc:HGNC:24102]                                             |
| ATL3     | atlastin GTPase 3 [Source:HGNC Symbol;Acc:HGNC:24526]                                           |
| ATP8B2   | ATPase phospholipid transporting 8B2 [Source:HGNC Symbol;Acc:HGNC:13534]                        |
| BCAS3    | breast carcinoma amplified sequence 3 [Source:HGNC Symbol;Acc:HGNC:14347]                       |
| BUD31    | BUD31 homolog [Source:HGNC Symbol;Acc:HGNC:29629]                                               |
| CLCN7    | chloride voltage-gated channel 7 [Source:HGNC Symbol;Acc:HGNC:2025]                             |
| CLEC4F   | C-type lectin domain family 4 member F [Source:HGNC Symbol;Acc:HGNC:25357]                      |
| CPSF6    | cleavage and polyadenylation specific factor 6 [Source:HGNC Symbol;Acc:HGNC:13871]              |
| CTSV     | cathepsin V [Source:HGNC Symbol;Acc:HGNC:2538]                                                  |
| FAIM     | Fas apoptotic inhibitory molecule [Source:HGNC Symbol;Acc:HGNC:18703]                           |
| FOXO1    | forkhead box D1 [Source:HGNC Symbol;Acc:HGNC:3802]                                              |
| GBA      | glucosylceramidase beta [Source:HGNC Symbol;Acc:HGNC:4177]                                      |
| GDPD5    | glycerophosphodiester phosphodiesterase domain containing 5 [Source:HGNC Symbol;Acc:HGNC:28804] |
| GHITM    | growth hormone inducible transmembrane protein [Source:HGNC Symbol;Acc:HGNC:17281]              |
| GPC6     | glypican 6 [Source:HGNC Symbol;Acc:HGNC:4454]                                                   |
| HIRIP3   | HIRA interacting protein 3 [Source:HGNC Symbol;Acc:HGNC:4917]                                   |
| IGF2BP2  | insulin like growth factor 2 mRNA binding protein 2 [Source:HGNC Symbol;Acc:HGNC:28867]         |
| ISOC1    | isochorismatase domain containing 1 [Source:HGNC Symbol;Acc:HGNC:24254]                         |
| KCNH1    | potassium voltage-gated channel subfamily H member 1 [Source:HGNC Symbol;Acc:HGNC:6250]         |
| MANEA    | mannosidase endo-alpha [Source:HGNC Symbol;Acc:HGNC:21072]                                      |
| MRPL20   | mitochondrial ribosomal protein L20 [Source:HGNC Symbol;Acc:HGNC:14478]                         |
| NANOS1   | nanos C2HC-type zinc finger 1 [Source:HGNC Symbol;Acc:HGNC:23044]                               |
| NDUFA4   | NDUFA4, mitochondrial complex associated [Source:HGNC Symbol;Acc:HGNC:7687]                     |
| PDZK1IP1 | PDZK1 interacting protein 1 [Source:HGNC Symbol;Acc:HGNC:16887]                                 |
| PIAS3    | protein inhibitor of activated STAT 3 [Source:HGNC Symbol;Acc:HGNC:16861]                       |
| PPP2R5A  | protein phosphatase 2 regulatory subunit B'alpha [Source:HGNC Symbol;Acc:HGNC:9309]             |
| PREB     | prolactin regulatory element binding [Source:HGNC Symbol;Acc:HGNC:9356]                         |
| PRODH2   | proline dehydrogenase 2 [Source:HGNC Symbol;Acc:HGNC:17325]                                     |
| PRPSAP1  | phosphoribosyl pyrophosphate synthetase-associated protein 1 [Source:HGNC Symbol;Acc:HGNC:9466] |
| QPRT     | quinolinate phosphoribosyltransferase [Source:HGNC Symbol;Acc:HGNC:9755]                        |
| RASGRF1  | Ras protein specific guanine nucleotide releasing factor 1 [Source:HGNC Symbol;Acc:HGNC:9875]   |
| RNF6     | ring finger protein 6 [Source:HGNC Symbol;Acc:HGNC:10069]                                       |
| RNH1     | ribonuclease/angiogenin inhibitor 1 [Source:HGNC Symbol;Acc:HGNC:10074]                         |
| RPS21    | ribosomal protein S21 [Source:HGNC Symbol;Acc:HGNC:10409]                                       |
| S100A16  | S100 calcium binding protein A16 [Source:HGNC Symbol;Acc:HGNC:20441]                            |

|          |                                                                                                                                       |
|----------|---------------------------------------------------------------------------------------------------------------------------------------|
| SH3BP4   | SH3 domain binding protein 4 [Source:HGNC Symbol;Acc:HGNC:10826]                                                                      |
| SKA2     | spindle and kinetochore associated complex subunit 2 [Source:HGNC Symbol;Acc:HGNC:28006]                                              |
| SMARCA5  | SWI/SNF related, matrix associated, actin dependent regulator of chromatin, subfamily a, member 5 [Source:HGNC Symbol;Acc:HGNC:11101] |
| SNX5     | sorting nexin 5 [Source:HGNC Symbol;Acc:HGNC:14969]                                                                                   |
| SOX13    | SRY-box 13 [Source:HGNC Symbol;Acc:HGNC:11192]                                                                                        |
| SP4      | Sp4 transcription factor [Source:HGNC Symbol;Acc:HGNC:11209]                                                                          |
| SPI1     | Spi-1 proto-oncogene [Source:HGNC Symbol;Acc:HGNC:11241]                                                                              |
| SPSB4    | splA/ryanodine receptor domain and SOCS box containing 4 [Source:HGNC Symbol;Acc:HGNC:30630]                                          |
| STT3A    | STT3A, catalytic subunit of the oligosaccharyltransferase complex [Source:HGNC Symbol;Acc:HGNC:6172]                                  |
| TLK2     | tousled like kinase 2 [Source:HGNC Symbol;Acc:HGNC:11842]                                                                             |
| TM6SF1   | transmembrane 6 superfamily member 1 [Source:HGNC Symbol;Acc:HGNC:11860]                                                              |
| TMEM38B  | transmembrane protein 38B [Source:HGNC Symbol;Acc:HGNC:25535]                                                                         |
| TNNT3    | troponin T3, fast skeletal type [Source:HGNC Symbol;Acc:HGNC:11950]                                                                   |
| TRAPPC6A | trafficking protein particle complex 6A [Source:HGNC Symbol;Acc:HGNC:23069]                                                           |
| TTF2     | transcription termination factor 2 [Source:HGNC Symbol;Acc:HGNC:12398]                                                                |
| ZHX2     | zinc fingers and homeoboxes 2 [Source:HGNC Symbol;Acc:HGNC:18513]                                                                     |
| ASF1A    | anti-silencing function 1A histone chaperone [Source:HGNC Symbol;Acc:HGNC:20995]                                                      |
| CST6     | cystatin E/M [Source:HGNC Symbol;Acc:HGNC:2478]                                                                                       |
| EPHB2    | EPH receptor B2 [Source:HGNC Symbol;Acc:HGNC:3393]                                                                                    |
| HSPB6    | heat shock protein family B (small) member 6 [Source:HGNC Symbol;Acc:HGNC:26511]                                                      |
| ITIH1    | inter-alpha-trypsin inhibitor heavy chain 1 [Source:HGNC Symbol;Acc:HGNC:6166]                                                        |
| LPAR6    | lysophosphatidic acid receptor 6 [Source:HGNC Symbol;Acc:HGNC:15520]                                                                  |
| MAPK6    | mitogen-activated protein kinase 6 [Source:HGNC Symbol;Acc:HGNC:6879]                                                                 |
| MND1     | meiotic nuclear divisions 1 [Source:HGNC Symbol;Acc:HGNC:24839]                                                                       |
| NPR2     | natriuretic peptide receptor 2 [Source:HGNC Symbol;Acc:HGNC:7944]                                                                     |
| NTN1     | netrin 1 [Source:HGNC Symbol;Acc:HGNC:8029]                                                                                           |
| PALMD    | palmdelphin [Source:HGNC Symbol;Acc:HGNC:15846]                                                                                       |
| PITPNC1  | phosphatidylinositol transfer protein, cytoplasmic 1 [Source:HGNC Symbol;Acc:HGNC:21045]                                              |
| PYCR1    | pyrroline-5-carboxylate reductase 1 [Source:HGNC Symbol;Acc:HGNC:9721]                                                                |
| SCG2     | secretogranin II [Source:HGNC Symbol;Acc:HGNC:10575]                                                                                  |
| SPAG9    | sperm associated antigen 9 [Source:HGNC Symbol;Acc:HGNC:14524]                                                                        |
| TRIM16   | tripartite motif containing 16 [Source:HGNC Symbol;Acc:HGNC:17241]                                                                    |
| WNT11    | Wnt family member 11 [Source:HGNC Symbol;Acc:HGNC:12776]                                                                              |
| BEX2     | brain expressed X-linked 2 [Source:HGNC Symbol;Acc:HGNC:30933]                                                                        |
| CENPQ    | centromere protein Q [Source:HGNC Symbol;Acc:HGNC:21347]                                                                              |
| CREBZF   | CREB/ATF bZIP transcription factor [Source:HGNC Symbol;Acc:HGNC:24905]                                                                |
| DSN1     | DSN1 homolog, MIS12 kinetochore complex component [Source:HGNC Symbol;Acc:HGNC:16165]                                                 |

|          |                                                                                                    |
|----------|----------------------------------------------------------------------------------------------------|
| HOMER2   | homer scaffolding protein 2 [Source:HGNC Symbol;Acc:HGNC:17513]                                    |
| KDM5A    | lysine demethylase 5A [Source:HGNC Symbol;Acc:HGNC:9886]                                           |
| NADK2    | NAD kinase 2, mitochondrial [Source:HGNC Symbol;Acc:HGNC:26404]                                    |
| PTGES3   | prostaglandin E synthase 3 [Source:HGNC Symbol;Acc:HGNC:16049]                                     |
| PTPRR    | protein tyrosine phosphatase, receptor type R [Source:HGNC Symbol;Acc:HGNC:9680]                   |
| RAB11A   | RAB11A, member RAS oncogene family [Source:HGNC Symbol;Acc:HGNC:9760]                              |
| SHB      | SH2 domain containing adaptor protein B [Source:HGNC Symbol;Acc:HGNC:10838]                        |
| SP100    | SP100 nuclear antigen [Source:HGNC Symbol;Acc:HGNC:11206]                                          |
| SRRT     | serrate, RNA effector molecule [Source:HGNC Symbol;Acc:HGNC:24101]                                 |
| TIMM10   | translocase of inner mitochondrial membrane 10 homolog (yeast) [Source:HGNC Symbol;Acc:HGNC:11814] |
| TRMT6    | tRNA methyltransferase 6 [Source:HGNC Symbol;Acc:HGNC:20900]                                       |
| USP10    | ubiquitin specific peptidase 10 [Source:HGNC Symbol;Acc:HGNC:12608]                                |
| WNT1     | Wnt family member 1 [Source:HGNC Symbol;Acc:HGNC:12774]                                            |
| ABL2     | ABL proto-oncogene 2, non-receptor tyrosine kinase [Source:HGNC Symbol;Acc:HGNC:77]                |
| MT-ATP6  | mitochondrially encoded ATP synthase 6 [Source:HGNC Symbol;Acc:HGNC:7414]                          |
| CADPS2   | calcium dependent secretion activator 2 [Source:HGNC Symbol;Acc:HGNC:16018]                        |
| EFNB1    | ephrin B1 [Source:HGNC Symbol;Acc:HGNC:3226]                                                       |
| FLG      | filaggrin [Source:HGNC Symbol;Acc:HGNC:3748]                                                       |
| GPNMB    | glycoprotein nmb [Source:HGNC Symbol;Acc:HGNC:4462]                                                |
| ILK      | integrin linked kinase [Source:HGNC Symbol;Acc:HGNC:6040]                                          |
| MOXD1    | monooxygenase DBH like 1 [Source:HGNC Symbol;Acc:HGNC:21063]                                       |
| PDE4B    | phosphodiesterase 4B [Source:HGNC Symbol;Acc:HGNC:8781]                                            |
| RPL22    | ribosomal protein L22 [Source:HGNC Symbol;Acc:HGNC:10315]                                          |
| SERPINB1 | serpin family B member 1 [Source:HGNC Symbol;Acc:HGNC:3311]                                        |
| TNIK     | TRAF2 and NCK interacting kinase [Source:HGNC Symbol;Acc:HGNC:30765]                               |
| UBE2N    | ubiquitin conjugating enzyme E2 N [Source:HGNC Symbol;Acc:HGNC:12492]                              |
| CAPZB    | capping actin protein of muscle Z-line beta subunit [Source:HGNC Symbol;Acc:HGNC:1491]             |
| CENPN    | centromere protein N [Source:HGNC Symbol;Acc:HGNC:30873]                                           |
| CHRNB1   | cholinergic receptor nicotinic beta 1 subunit [Source:HGNC Symbol;Acc:HGNC:1961]                   |
| GINS3    | GINS complex subunit 3 [Source:HGNC Symbol;Acc:HGNC:25851]                                         |
| HNF1B    | HNF1 homeobox B [Source:HGNC Symbol;Acc:HGNC:11630]                                                |
| LY6D     | lymphocyte antigen 6 complex, locus D [Source:HGNC Symbol;Acc:HGNC:13348]                          |
| MDFIC    | MyoD family inhibitor domain containing [Source:HGNC Symbol;Acc:HGNC:28870]                        |
| MYOCD    | myocardin [Source:HGNC Symbol;Acc:HGNC:16067]                                                      |
| NDUFA13  | NADH:ubiquinone oxidoreductase subunit A13 [Source:HGNC Symbol;Acc:HGNC:17194]                     |
| NEO1     | neogenin 1 [Source:HGNC Symbol;Acc:HGNC:7754]                                                      |
| NUP155   | nucleoporin 155 [Source:HGNC Symbol;Acc:HGNC:8063]                                                 |
| PDCD11   | programmed cell death 11 [Source:HGNC Symbol;Acc:HGNC:13408]                                       |

|          |                                                                                                                         |
|----------|-------------------------------------------------------------------------------------------------------------------------|
| PLCB3    | phospholipase C beta 3 [Source:HGNC Symbol;Acc:HGNC:9056]                                                               |
| RAB5C    | RAB5C, member RAS oncogene family [Source:HGNC Symbol;Acc:HGNC:9785]                                                    |
| SLC15A3  | solute carrier family 15 member 3 [Source:HGNC Symbol;Acc:HGNC:18068]                                                   |
| SRPRB    | SRP receptor beta subunit [Source:HGNC Symbol;Acc:HGNC:24085]                                                           |
| TMX1     | thioredoxin related transmembrane protein 1 [Source:HGNC Symbol;Acc:HGNC:15487]                                         |
| UACA     | uveal autoantigen with coiled-coil domains and ankyrin repeats [Source:HGNC Symbol;Acc:HGNC:15947]                      |
| WNT2     | Wnt family member 2 [Source:HGNC Symbol;Acc:HGNC:12780]                                                                 |
| ZSWIM6   | zinc finger SWIM-type containing 6 [Source:HGNC Symbol;Acc:HGNC:29316]                                                  |
| EIF3B    | eukaryotic translation initiation factor 3 subunit B [Source:HGNC Symbol;Acc:HGNC:3280]                                 |
| HIBCH    | 3-hydroxyisobutyryl-CoA hydrolase [Source:HGNC Symbol;Acc:HGNC:4908]                                                    |
| KIF4A    | kinesin family member 4A [Source:HGNC Symbol;Acc:HGNC:13339]                                                            |
| NECTIN3  | nectin cell adhesion molecule 3 [Source:HGNC Symbol;Acc:HGNC:17664]                                                     |
| SLC47A2  | solute carrier family 47 member 2 [Source:HGNC Symbol;Acc:HGNC:26439]                                                   |
| TRPV6    | transient receptor potential cation channel subfamily V member 6 [Source:HGNC Symbol;Acc:HGNC:14006]                    |
| WDR1     | WD repeat domain 1 [Source:HGNC Symbol;Acc:HGNC:12754]                                                                  |
| BSCL2    | BSCL2, seipin lipid droplet biogenesis associated [Source:HGNC Symbol;Acc:HGNC:15832]                                   |
| CDK8     | cyclin dependent kinase 8 [Source:HGNC Symbol;Acc:HGNC:1779]                                                            |
| CHAC2    | ChaC cation transport regulator homolog 2 [Source:HGNC Symbol;Acc:HGNC:32363]                                           |
| CHCHD3   | coiled-coil-helix-coiled-coil-helix domain containing 3 [Source:HGNC Symbol;Acc:HGNC:21906]                             |
| DDOST    | dolichyl-diphosphooligosaccharide--protein glycosyltransferase non-catalytic subunit [Source:HGNC Symbol;Acc:HGNC:2728] |
| EPS15    | epidermal growth factor receptor pathway substrate 15 [Source:HGNC Symbol;Acc:HGNC:3419]                                |
| EZH1     | enhancer of zeste 1 polycomb repressive complex 2 subunit [Source:HGNC Symbol;Acc:HGNC:3526]                            |
| GTF2B    | general transcription factor IIB [Source:HGNC Symbol;Acc:HGNC:4648]                                                     |
| MAX      | MYC associated factor X [Source:HGNC Symbol;Acc:HGNC:6913]                                                              |
| MIS18BP1 | MIS18 binding protein 1 [Source:HGNC Symbol;Acc:HGNC:20190]                                                             |
| PARP2    | poly(ADP-ribose) polymerase 2 [Source:HGNC Symbol;Acc:HGNC:272]                                                         |
| PARPBP   | PARP1 binding protein [Source:HGNC Symbol;Acc:HGNC:26074]                                                               |
| PRKX     | protein kinase, X-linked [Source:HGNC Symbol;Acc:HGNC:9441]                                                             |
| RAB23    | RAB23, member RAS oncogene family [Source:HGNC Symbol;Acc:HGNC:14263]                                                   |
| STK17A   | serine/threonine kinase 17a [Source:HGNC Symbol;Acc:HGNC:11395]                                                         |
| SULT1A3  | sulfotransferase family 1A member 3 [Source:HGNC Symbol;Acc:HGNC:11455]                                                 |
| TAF15    | TATA-box binding protein associated factor 15 [Source:HGNC Symbol;Acc:HGNC:11547]                                       |
| TMEM106C | transmembrane protein 106C [Source:HGNC Symbol;Acc:HGNC:28775]                                                          |
| TOB2     | transducer of ERBB2, 2 [Source:HGNC Symbol;Acc:HGNC:11980]                                                              |

|         |                                                                                                   |
|---------|---------------------------------------------------------------------------------------------------|
| VPS13B  | vacuolar protein sorting 13 homolog B [Source:HGNC Symbol;Acc:HGNC:2183]                          |
| VRK1    | vaccinia related kinase 1 [Source:HGNC Symbol;Acc:HGNC:12718]                                     |
| ZMYM2   | zinc finger MYM-type containing 2 [Source:HGNC Symbol;Acc:HGNC:12989]                             |
| ACAA1   | acetyl-CoA acyltransferase 1 [Source:HGNC Symbol;Acc:HGNC:82]                                     |
| CASR    | calcium sensing receptor [Source:HGNC Symbol;Acc:HGNC:1514]                                       |
| COX5B   | cytochrome c oxidase subunit 5B [Source:HGNC Symbol;Acc:HGNC:2269]                                |
| GPM6A   | glycoprotein M6A [Source:HGNC Symbol;Acc:HGNC:4460]                                               |
| NUCKS1  | nuclear casein kinase and cyclin dependent kinase substrate 1 [Source:HGNC Symbol;Acc:HGNC:29923] |
| SMPDL3A | sphingomyelin phosphodiesterase acid like 3A [Source:HGNC Symbol;Acc:HGNC:17389]                  |
| ABCB9   | ATP binding cassette subfamily B member 9 [Source:HGNC Symbol;Acc:HGNC:50]                        |
| ABCF2   | ATP binding cassette subfamily F member 2 [Source:HGNC Symbol;Acc:HGNC:71]                        |
| ACMSD   | aminocarboxymuconate semialdehyde decarboxylase [Source:HGNC Symbol;Acc:HGNC:19288]               |
| ARF4    | ADP ribosylation factor 4 [Source:HGNC Symbol;Acc:HGNC:655]                                       |
| ARID1B  | AT-rich interaction domain 1B [Source:HGNC Symbol;Acc:HGNC:18040]                                 |
| ARL1    | ADP ribosylation factor like GTPase 1 [Source:HGNC Symbol;Acc:HGNC:692]                           |
| AUTS2   | autism susceptibility candidate 2 [Source:HGNC Symbol;Acc:HGNC:14262]                             |
| CAMP    | cathelicidin antimicrobial peptide [Source:HGNC Symbol;Acc:HGNC:1472]                             |
| CBX1    | chromobox 1 [Source:HGNC Symbol;Acc:HGNC:1551]                                                    |
| CCR4    | C-C motif chemokine receptor 4 [Source:HGNC Symbol;Acc:HGNC:1605]                                 |
| CDKAL1  | CDK5 regulatory subunit associated protein 1 like 1 [Source:HGNC Symbol;Acc:HGNC:21050]           |
| CLCN5   | chloride voltage-gated channel 5 [Source:HGNC Symbol;Acc:HGNC:2023]                               |
| COX8A   | cytochrome c oxidase subunit 8A [Source:HGNC Symbol;Acc:HGNC:2294]                                |
| CTNND2  | catenin delta 2 [Source:HGNC Symbol;Acc:HGNC:2516]                                                |
| CYB5R1  | cytochrome b5 reductase 1 [Source:HGNC Symbol;Acc:HGNC:13397]                                     |
| DDX10   | DEAD-box helicase 10 [Source:HGNC Symbol;Acc:HGNC:2735]                                           |
| DERL3   | derlin 3 [Source:HGNC Symbol;Acc:HGNC:14236]                                                      |
| FAR1    | fatty acyl-CoA reductase 1 [Source:HGNC Symbol;Acc:HGNC:26222]                                    |
| GLRX2   | glutaredoxin 2 [Source:HGNC Symbol;Acc:HGNC:16065]                                                |
| H3F3B   | H3 histone, family 3B (H3.3B) [Source:HGNC Symbol;Acc:HGNC:4765]                                  |
| KHSRP   | KH-type splicing regulatory protein [Source:HGNC Symbol;Acc:HGNC:6316]                            |
| LYAR    | Ly1 antibody reactive [Source:HGNC Symbol;Acc:HGNC:26021]                                         |
| MAP3K4  | mitogen-activated protein kinase kinase kinase 4 [Source:HGNC Symbol;Acc:HGNC:6856]               |
| NDUFA3  | NADH:ubiquinone oxidoreductase subunit A3 [Source:HGNC Symbol;Acc:HGNC:7686]                      |
| NDUFS3  | NADH:ubiquinone oxidoreductase core subunit S3 [Source:HGNC Symbol;Acc:HGNC:7710]                 |
| NDUFS5  | NADH:ubiquinone oxidoreductase subunit S5 [Source:HGNC Symbol;Acc:HGNC:7712]                      |
| NPPC    | natriuretic peptide C [Source:HGNC Symbol;Acc:HGNC:7941]                                          |



|         |                                                                                                   |
|---------|---------------------------------------------------------------------------------------------------|
| PARM1   | prostate androgen-regulated mucin-like protein 1 [Source:HGNC Symbol;Acc:HGNC:24536]              |
| PGP     | phosphoglycolate phosphatase [Source:HGNC Symbol;Acc:HGNC:8909]                                   |
| POLI    | polymerase (DNA) iota [Source:HGNC Symbol;Acc:HGNC:9182]                                          |
| RERG    | RAS like estrogen regulated growth inhibitor [Source:HGNC Symbol;Acc:HGNC:15980]                  |
| RPRM    | reprimo, TP53 dependent G2 arrest mediator candidate [Source:HGNC Symbol;Acc:HGNC:24201]          |
| SRP72   | signal recognition particle 72kDa [Source:HGNC Symbol;Acc:HGNC:11303]                             |
| ST3GAL3 | ST3 beta-galactoside alpha-2,3-sialyltransferase 3 [Source:HGNC Symbol;Acc:HGNC:10866]            |
| SUZ12   | SUZ12 polycomb repressive complex 2 subunit [Source:HGNC Symbol;Acc:HGNC:17101]                   |
| SYBU    | syntabulin [Source:HGNC Symbol;Acc:HGNC:26011]                                                    |
| TERF1   | telomeric repeat binding factor 1 [Source:HGNC Symbol;Acc:HGNC:11728]                             |
| TFB1M   | transcription factor B1, mitochondrial [Source:HGNC Symbol;Acc:HGNC:17037]                        |
| TIGAR   | TP53 induced glycolysis regulatory phosphatase [Source:HGNC Symbol;Acc:HGNC:1185]                 |
| TRERF1  | transcriptional regulating factor 1 [Source:HGNC Symbol;Acc:HGNC:18273]                           |
| TRIM63  | tripartite motif containing 63 [Source:HGNC Symbol;Acc:HGNC:16007]                                |
| USP1    | ubiquitin specific peptidase 1 [Source:HGNC Symbol;Acc:HGNC:12607]                                |
| ADRA1D  | adrenoceptor alpha 1D [Source:HGNC Symbol;Acc:HGNC:280]                                           |
| AIFM2   | apoptosis inducing factor, mitochondria associated 2 [Source:HGNC Symbol;Acc:HGNC:21411]          |
| ARRDC2  | arrestin domain containing 2 [Source:HGNC Symbol;Acc:HGNC:25225]                                  |
| DEPDC1B | DEP domain containing 1B [Source:HGNC Symbol;Acc:HGNC:24902]                                      |
| DHCR24  | 24-dehydrocholesterol reductase [Source:HGNC Symbol;Acc:HGNC:2859]                                |
| GPCPD1  | glycerophosphocholine phosphodiesterase 1 [Source:HGNC Symbol;Acc:HGNC:26957]                     |
| H6PD    | hexose-6-phosphate dehydrogenase/glucose 1-dehydrogenase [Source:HGNC Symbol;Acc:HGNC:4795]       |
| MEST    | mesoderm specific transcript [Source:HGNC Symbol;Acc:HGNC:7028]                                   |
| RPL10   | ribosomal protein L10 [Source:HGNC Symbol;Acc:HGNC:10298]                                         |
| RPL7    | ribosomal protein L7 [Source:HGNC Symbol;Acc:HGNC:10363]                                          |
| VHL     | von Hippel-Lindau tumor suppressor [Source:HGNC Symbol;Acc:HGNC:12687]                            |
| ACOT13  | acyl-CoA thioesterase 13 [Source:HGNC Symbol;Acc:HGNC:20999]                                      |
| AGPAT4  | 1-acylglycerol-3-phosphate O-acyltransferase 4 [Source:HGNC Symbol;Acc:HGNC:20885]                |
| ATG3    | autophagy related 3 [Source:HGNC Symbol;Acc:HGNC:20962]                                           |
| ATL2    | atlastin GTPase 2 [Source:HGNC Symbol;Acc:HGNC:24047]                                             |
| B3GNT5  | UDP-GlcNAc:betaGal beta-1,3-N-acetylglucosaminyltransferase 5 [Source:HGNC Symbol;Acc:HGNC:15684] |
| CAV3    | caveolin 3 [Source:HGNC Symbol;Acc:HGNC:1529]                                                     |
| CDK12   | cyclin dependent kinase 12 [Source:HGNC Symbol;Acc:HGNC:24224]                                    |
| CENPH   | centromere protein H [Source:HGNC Symbol;Acc:HGNC:17268]                                          |

|           |                                                                                                     |
|-----------|-----------------------------------------------------------------------------------------------------|
| CTTNBP2NL | CTTNBP2 N-terminal like [Source:HGNC Symbol;Acc:HGNC:25330]                                         |
| FMO4      | flavin containing monooxygenase 4 [Source:HGNC Symbol;Acc:HGNC:3772]                                |
| GOLIM4    | golgi integral membrane protein 4 [Source:HGNC Symbol;Acc:HGNC:15448]                               |
| MAMDC2    | MAM domain containing 2 [Source:HGNC Symbol;Acc:HGNC:23673]                                         |
| MECR      | mitochondrial trans-2-enoyl-CoA reductase [Source:HGNC Symbol;Acc:HGNC:19691]                       |
| NACA      | nascent polypeptide-associated complex alpha subunit [Source:HGNC Symbol;Acc:HGNC:7629]             |
| PI4K2B    | phosphatidylinositol 4-kinase type 2 beta [Source:HGNC Symbol;Acc:HGNC:18215]                       |
| SGO2      | shugoshin 2 [Source:HGNC Symbol;Acc:HGNC:30812]                                                     |
| SLBP      | stem-loop binding protein [Source:HGNC Symbol;Acc:HGNC:10904]                                       |
| SLC27A3   | solute carrier family 27 member 3 [Source:HGNC Symbol;Acc:HGNC:10997]                               |
| SLC9A3    | solute carrier family 9 member A3 [Source:HGNC Symbol;Acc:HGNC:11073]                               |
| SRD5A3    | steroid 5 alpha-reductase 3 [Source:HGNC Symbol;Acc:HGNC:25812]                                     |
| TIMM8B    | translocase of inner mitochondrial membrane 8 homolog B (yeast) [Source:HGNC Symbol;Acc:HGNC:11818] |
| TSC22D2   | TSC22 domain family member 2 [Source:HGNC Symbol;Acc:HGNC:29095]                                    |
| CA2       | carbonic anhydrase 2 [Source:HGNC Symbol;Acc:HGNC:1373]                                             |
| EHMT2     | euchromatic histone lysine methyltransferase 2 [Source:HGNC Symbol;Acc:HGNC:14129]                  |
| EPB41L1   | erythrocyte membrane protein band 4.1 like 1 [Source:HGNC Symbol;Acc:HGNC:3378]                     |
| FGA       | fibrinogen alpha chain [Source:HGNC Symbol;Acc:HGNC:3661]                                           |
| KRT14     | keratin 14 [Source:HGNC Symbol;Acc:HGNC:6416]                                                       |
| MSX1      | msh homeobox 1 [Source:HGNC Symbol;Acc:HGNC:7391]                                                   |
| RHEB      | Ras homolog enriched in brain [Source:HGNC Symbol;Acc:HGNC:10011]                                   |
| RPL13A    | ribosomal protein L13a [Source:HGNC Symbol;Acc:HGNC:10304]                                          |
| SOX18     | SRY-box 18 [Source:HGNC Symbol;Acc:HGNC:11194]                                                      |
| TMEM37    | transmembrane protein 37 [Source:HGNC Symbol;Acc:HGNC:18216]                                        |
| ABI1      | abl interactor 1 [Source:HGNC Symbol;Acc:HGNC:11320]                                                |
| ANAPC1    | anaphase promoting complex subunit 1 [Source:HGNC Symbol;Acc:HGNC:19988]                            |
| ARAF      | A-Raf proto-oncogene, serine/threonine kinase [Source:HGNC Symbol;Acc:HGNC:646]                     |
| ATPIF1    | ATPase inhibitory factor 1 [Source:HGNC Symbol;Acc:HGNC:871]                                        |
| BEX3      | brain expressed X-linked 3 [Source:HGNC Symbol;Acc:HGNC:13388]                                      |
| BMP2K     | BMP2 inducible kinase [Source:HGNC Symbol;Acc:HGNC:18041]                                           |
| CBFB      | core-binding factor, beta subunit [Source:HGNC Symbol;Acc:HGNC:1539]                                |
| CCT4      | chaperonin containing TCP1 subunit 4 [Source:HGNC Symbol;Acc:HGNC:1617]                             |
| CELSR2    | cadherin EGF LAG seven-pass G-type receptor 2 [Source:HGNC Symbol;Acc:HGNC:3231]                    |
| CHGB      | chromogranin B [Source:HGNC Symbol;Acc:HGNC:1930]                                                   |
| CLYBL     | citrate lyase beta like [Source:HGNC Symbol;Acc:HGNC:18355]                                         |
| CPB2      | carboxypeptidase B2 [Source:HGNC Symbol;Acc:HGNC:2300]                                              |
| CYB561    | cytochrome b561 [Source:HGNC Symbol;Acc:HGNC:2571]                                                  |

|         |                                                                                                         |
|---------|---------------------------------------------------------------------------------------------------------|
| CYP4F2  | cytochrome P450 family 4 subfamily F member 2 [Source:HGNC Symbol;Acc:HGNC:2645]                        |
| DCAKD   | dephospho-CoA kinase domain containing [Source:HGNC Symbol;Acc:HGNC:26238]                              |
| DYNLT3  | dynein light chain Tctex-type 3 [Source:HGNC Symbol;Acc:HGNC:11694]                                     |
| DYRK1A  | dual specificity tyrosine phosphorylation regulated kinase 1A [Source:HGNC Symbol;Acc:HGNC:3091]        |
| EEF1E1  | eukaryotic translation elongation factor 1 epsilon 1 [Source:HGNC Symbol;Acc:HGNC:3212]                 |
| FMNL2   | formin like 2 [Source:HGNC Symbol;Acc:HGNC:18267]                                                       |
| GMPPB   | GDP-mannose pyrophosphorylase B [Source:HGNC Symbol;Acc:HGNC:22932]                                     |
| HOXB9   | homeobox B9 [Source:HGNC Symbol;Acc:HGNC:5120]                                                          |
| IFRD2   | interferon-related developmental regulator 2 [Source:HGNC Symbol;Acc:HGNC:5457]                         |
| LMNB2   | lamin B2 [Source:HGNC Symbol;Acc:HGNC:6638]                                                             |
| MCM8    | minichromosome maintenance 8 homologous recombination repair factor [Source:HGNC Symbol;Acc:HGNC:16147] |
| MFAP5   | microfibrillar associated protein 5 [Source:HGNC Symbol;Acc:HGNC:29673]                                 |
| MPRIP   | myosin phosphatase Rho interacting protein [Source:HGNC Symbol;Acc:HGNC:30321]                          |
| MSI2    | musashi RNA binding protein 2 [Source:HGNC Symbol;Acc:HGNC:18585]                                       |
| NAB1    | NGFI-A binding protein 1 [Source:HGNC Symbol;Acc:HGNC:7626]                                             |
| NDUFA7  | NADH:ubiquinone oxidoreductase subunit A7 [Source:HGNC Symbol;Acc:HGNC:7691]                            |
| NOC3L   | NOC3 like DNA replication regulator [Source:HGNC Symbol;Acc:HGNC:24034]                                 |
| NPHS2   | NPHS2 podocin [Source:HGNC Symbol;Acc:HGNC:13394]                                                       |
| NUP98   | nucleoporin 98 [Source:HGNC Symbol;Acc:HGNC:8068]                                                       |
| PGPEP1  | pyroglutamyl-peptidase I [Source:HGNC Symbol;Acc:HGNC:13568]                                            |
| PKD2    | polycystin 2, transient receptor potential cation channel [Source:HGNC Symbol;Acc:HGNC:9009]            |
| PLEKHA5 | pleckstrin homology domain containing A5 [Source:HGNC Symbol;Acc:HGNC:30036]                            |
| PLOD3   | procollagen-lysine,2-oxoglutarate 5-dioxygenase 3 [Source:HGNC Symbol;Acc:HGNC:9083]                    |
| RAB1A   | RAB1A, member RAS oncogene family [Source:HGNC Symbol;Acc:HGNC:9758]                                    |
| RASGRP2 | RAS guanyl releasing protein 2 [Source:HGNC Symbol;Acc:HGNC:9879]                                       |
| RBM33   | RNA binding motif protein 33 [Source:HGNC Symbol;Acc:HGNC:27223]                                        |
| RNF128  | ring finger protein 128, E3 ubiquitin protein ligase [Source:HGNC Symbol;Acc:HGNC:21153]                |
| SLC17A5 | solute carrier family 17 member 5 [Source:HGNC Symbol;Acc:HGNC:10933]                                   |
| SMC3    | structural maintenance of chromosomes 3 [Source:HGNC Symbol;Acc:HGNC:2468]                              |
| STIL    | SCL/TAL1 interrupting locus [Source:HGNC Symbol;Acc:HGNC:10879]                                         |
| TBC1D2  | TBC1 domain family member 2 [Source:HGNC Symbol;Acc:HGNC:18026]                                         |
| TCOF1   | treacle ribosome biogenesis factor 1 [Source:HGNC Symbol;Acc:HGNC:11654]                                |
| TECR    | trans-2,3-enoyl-CoA reductase [Source:HGNC Symbol;Acc:HGNC:4551]                                        |
| TMED3   | transmembrane p24 trafficking protein 3 [Source:HGNC Symbol;Acc:HGNC:28889]                             |
| TRAM1   | translocation associated membrane protein 1 [Source:HGNC Symbol;Acc:HGNC:20568]                         |
| UBE2L3  | ubiquitin conjugating enzyme E2 L3 [Source:HGNC Symbol;Acc:HGNC:12488]                                  |

|          |                                                                                                |
|----------|------------------------------------------------------------------------------------------------|
| UQCRB    | ubiquinol-cytochrome c reductase binding protein [Source:HGNC Symbol;Acc:HGNC:12582]           |
| WASL     | Wiskott-Aldrich syndrome like [Source:HGNC Symbol;Acc:HGNC:12735]                              |
| WDR43    | WD repeat domain 43 [Source:HGNC Symbol;Acc:HGNC:28945]                                        |
| ZMYM3    | zinc finger MYM-type containing 3 [Source:HGNC Symbol;Acc:HGNC:13054]                          |
| ADH5     | alcohol dehydrogenase 5 (class III), chi polypeptide [Source:HGNC Symbol;Acc:HGNC:253]         |
| APLP2    | amyloid beta precursor like protein 2 [Source:HGNC Symbol;Acc:HGNC:598]                        |
| BAG1     | BCL2 associated athanogene 1 [Source:HGNC Symbol;Acc:HGNC:937]                                 |
| CENPK    | centromere protein K [Source:HGNC Symbol;Acc:HGNC:29479]                                       |
| DRD4     | dopamine receptor D4 [Source:HGNC Symbol;Acc:HGNC:3025]                                        |
| EEF1D    | eukaryotic translation elongation factor 1 delta [Source:HGNC Symbol;Acc:HGNC:3211]            |
| EIF3A    | eukaryotic translation initiation factor 3 subunit A [Source:HGNC Symbol;Acc:HGNC:3271]        |
| FXYS5    | FXYS domain containing ion transport regulator 5 [Source:HGNC Symbol;Acc:HGNC:4029]            |
| GM2A     | GM2 ganglioside activator [Source:HGNC Symbol;Acc:HGNC:4367]                                   |
| GNAO1    | G protein subunit alpha o1 [Source:HGNC Symbol;Acc:HGNC:4389]                                  |
| HRH3     | histamine receptor H3 [Source:HGNC Symbol;Acc:HGNC:5184]                                       |
| MAPKAPK3 | mitogen-activated protein kinase-activated protein kinase 3 [Source:HGNC Symbol;Acc:HGNC:6888] |
| ORM2     | orosomucoid 2 [Source:HGNC Symbol;Acc:HGNC:8499]                                               |
| PDGFR1   | platelet derived growth factor receptor like [Source:HGNC Symbol;Acc:HGNC:8805]                |
| PEL1     | pellino E3 ubiquitin protein ligase 1 [Source:HGNC Symbol;Acc:HGNC:8827]                       |
| PHLDA1   | pleckstrin homology like domain family A member 1 [Source:HGNC Symbol;Acc:HGNC:8933]           |
| PSPH     | phosphoserine phosphatase [Source:HGNC Symbol;Acc:HGNC:9577]                                   |
| PTMS     | parathymosin [Source:HGNC Symbol;Acc:HGNC:9629]                                                |
| VMP1     | vacuole membrane protein 1 [Source:HGNC Symbol;Acc:HGNC:29559]                                 |
| ACIN1    | apoptotic chromatin condensation inducer 1 [Source:HGNC Symbol;Acc:HGNC:17066]                 |
| APOBEC3B | apolipoprotein B mRNA editing enzyme catalytic subunit 3B [Source:HGNC Symbol;Acc:HGNC:17352]  |
| CDC42BPA | CDC42 binding protein kinase alpha [Source:HGNC Symbol;Acc:HGNC:1737]                          |
| CEP57    | centrosomal protein 57 [Source:HGNC Symbol;Acc:HGNC:30794]                                     |
| CREB3L2  | cAMP responsive element binding protein 3 like 2 [Source:HGNC Symbol;Acc:HGNC:23720]           |
| DLST     | dihydrolipoamide S-succinyltransferase [Source:HGNC Symbol;Acc:HGNC:2911]                      |
| ESPN     | espin [Source:HGNC Symbol;Acc:HGNC:13281]                                                      |
| FOXO4    | forkhead box O4 [Source:HGNC Symbol;Acc:HGNC:7139]                                             |
| LACTB2   | lactamase beta 2 [Source:HGNC Symbol;Acc:HGNC:18512]                                           |
| MADD     | MAP kinase activating death domain [Source:HGNC Symbol;Acc:HGNC:6766]                          |
| MAPK7    | mitogen-activated protein kinase 7 [Source:HGNC Symbol;Acc:HGNC:6880]                          |
| MTCH2    | mitochondrial carrier 2 [Source:HGNC Symbol;Acc:HGNC:17587]                                    |

|          |                                                                                                                                       |
|----------|---------------------------------------------------------------------------------------------------------------------------------------|
| PAX8     | paired box 8 [Source:HGNC Symbol;Acc:HGNC:8622]                                                                                       |
| PLCD1    | phospholipase C delta 1 [Source:HGNC Symbol;Acc:HGNC:9060]                                                                            |
| PPP1R2   | protein phosphatase 1 regulatory inhibitor subunit 2 [Source:HGNC Symbol;Acc:HGNC:9288]                                               |
| PTPRN2   | protein tyrosine phosphatase, receptor type N2 [Source:HGNC Symbol;Acc:HGNC:9677]                                                     |
| RAB6A    | RAB6A, member RAS oncogene family [Source:HGNC Symbol;Acc:HGNC:9786]                                                                  |
| S100A1   | S100 calcium binding protein A1 [Source:HGNC Symbol;Acc:HGNC:10486]                                                                   |
| SF3B1    | splicing factor 3b subunit 1 [Source:HGNC Symbol;Acc:HGNC:10768]                                                                      |
| SLA      | Src-like-adaptor [Source:HGNC Symbol;Acc:HGNC:10902]                                                                                  |
| SMAD5    | SMAD family member 5 [Source:HGNC Symbol;Acc:HGNC:6771]                                                                               |
| SMARCE1  | SWI/SNF related, matrix associated, actin dependent regulator of chromatin, subfamily e, member 1 [Source:HGNC Symbol;Acc:HGNC:11109] |
| SRF      | serum response factor [Source:HGNC Symbol;Acc:HGNC:11291]                                                                             |
| SRSF10   | serine and arginine rich splicing factor 10 [Source:HGNC Symbol;Acc:HGNC:16713]                                                       |
| TDP1     | tyrosyl-DNA phosphodiesterase 1 [Source:HGNC Symbol;Acc:HGNC:18884]                                                                   |
| TUBG1    | tubulin gamma 1 [Source:HGNC Symbol;Acc:HGNC:12417]                                                                                   |
| USP36    | ubiquitin specific peptidase 36 [Source:HGNC Symbol;Acc:HGNC:20062]                                                                   |
| WWC1     | WW and C2 domain containing 1 [Source:HGNC Symbol;Acc:HGNC:29435]                                                                     |
| ARNT2    | aryl hydrocarbon receptor nuclear translocator 2 [Source:HGNC Symbol;Acc:HGNC:16876]                                                  |
| CHD2     | chromodomain helicase DNA binding protein 2 [Source:HGNC Symbol;Acc:HGNC:1917]                                                        |
| DLL1     | delta like canonical Notch ligand 1 [Source:HGNC Symbol;Acc:HGNC:2908]                                                                |
| EDNRA    | endothelin receptor type A [Source:HGNC Symbol;Acc:HGNC:3179]                                                                         |
| KIF22    | kinesin family member 22 [Source:HGNC Symbol;Acc:HGNC:6391]                                                                           |
| MBP      | myelin basic protein [Source:HGNC Symbol;Acc:HGNC:6925]                                                                               |
| MCF2L    | MCF.2 cell line derived transforming sequence like [Source:HGNC Symbol;Acc:HGNC:14576]                                                |
| PDE10A   | phosphodiesterase 10A [Source:HGNC Symbol;Acc:HGNC:8772]                                                                              |
| PECR     | peroxisomal trans-2-enoyl-CoA reductase [Source:HGNC Symbol;Acc:HGNC:18281]                                                           |
| RARB     | retinoic acid receptor beta [Source:HGNC Symbol;Acc:HGNC:9865]                                                                        |
| SERPIND1 | serpin family D member 1 [Source:HGNC Symbol;Acc:HGNC:4838]                                                                           |
| SIRPA    | signal regulatory protein alpha [Source:HGNC Symbol;Acc:HGNC:9662]                                                                    |
| SSTR2    | somatostatin receptor 2 [Source:HGNC Symbol;Acc:HGNC:11331]                                                                           |
| TRPM7    | transient receptor potential cation channel subfamily M member 7 [Source:HGNC Symbol;Acc:HGNC:17994]                                  |
| VSNL1    | visinin like 1 [Source:HGNC Symbol;Acc:HGNC:12722]                                                                                    |
| ACER2    | alkaline ceramidase 2 [Source:HGNC Symbol;Acc:HGNC:23675]                                                                             |
| ACTN2    | actinin alpha 2 [Source:HGNC Symbol;Acc:HGNC:164]                                                                                     |
| ADAMTS4  | ADAM metallopeptidase with thrombospondin type 1 motif 4 [Source:HGNC Symbol;Acc:HGNC:220]                                            |
| ANO1     | anoctamin 1 [Source:HGNC Symbol;Acc:HGNC:21625]                                                                                       |

|          |                                                                                                        |
|----------|--------------------------------------------------------------------------------------------------------|
| B3GALNT1 | beta-1,3-N-acetylgalactosaminyltransferase 1 (globoside blood group) [Source:HGNC Symbol;Acc:HGNC:918] |
| BCAT2    | branched chain amino acid transaminase 2 [Source:HGNC Symbol;Acc:HGNC:977]                             |
| CDC27    | cell division cycle 27 [Source:HGNC Symbol;Acc:HGNC:1728]                                              |
| CNBP     | CCHC-type zinc finger nucleic acid binding protein [Source:HGNC Symbol;Acc:HGNC:13164]                 |
| COX6A1   | cytochrome c oxidase subunit 6A1 [Source:HGNC Symbol;Acc:HGNC:2277]                                    |
| DTNA     | dystrobrevin alpha [Source:HGNC Symbol;Acc:HGNC:3057]                                                  |
| EPB41L2  | erythrocyte membrane protein band 4.1 like 2 [Source:HGNC Symbol;Acc:HGNC:3379]                        |
| FOXA3    | forkhead box A3 [Source:HGNC Symbol;Acc:HGNC:5023]                                                     |
| GPX8     | glutathione peroxidase 8 (putative) [Source:HGNC Symbol;Acc:HGNC:33100]                                |
| HLCS     | holocarboxylase synthetase [Source:HGNC Symbol;Acc:HGNC:4976]                                          |
| HNRNPR   | heterogeneous nuclear ribonucleoprotein R [Source:HGNC Symbol;Acc:HGNC:5047]                           |
| HR       | hair growth associated [Source:HGNC Symbol;Acc:HGNC:5172]                                              |
| LIMK1    | LIM domain kinase 1 [Source:HGNC Symbol;Acc:HGNC:6613]                                                 |
| LTC4S    | leukotriene C4 synthase [Source:HGNC Symbol;Acc:HGNC:6719]                                             |
| MMP16    | matrix metalloproteinase 16 [Source:HGNC Symbol;Acc:HGNC:7162]                                         |
| NUMA1    | nuclear mitotic apparatus protein 1 [Source:HGNC Symbol;Acc:HGNC:8059]                                 |
| PEG3     | paternally expressed 3 [Source:HGNC Symbol;Acc:HGNC:8826]                                              |
| PHF19    | PHD finger protein 19 [Source:HGNC Symbol;Acc:HGNC:24566]                                              |
| RAB38    | RAB38, member RAS oncogene family [Source:HGNC Symbol;Acc:HGNC:9776]                                   |
| RAP1B    | RAP1B, member of RAS oncogene family [Source:HGNC Symbol;Acc:HGNC:9857]                                |
| SEPHS2   | selenophosphate synthetase 2 [Source:HGNC Symbol;Acc:HGNC:19686]                                       |
| SLC25A22 | solute carrier family 25 member 22 [Source:HGNC Symbol;Acc:HGNC:19954]                                 |
| SUV39H1  | suppressor of variegation 3-9 homolog 1 [Source:HGNC Symbol;Acc:HGNC:11479]                            |
| SUV39H2  | suppressor of variegation 3-9 homolog 2 [Source:HGNC Symbol;Acc:HGNC:17287]                            |
| TMED5    | transmembrane p24 trafficking protein 5 [Source:HGNC Symbol;Acc:HGNC:24251]                            |
| UQCRH    | ubiquinol-cytochrome c reductase hinge protein [Source:HGNC Symbol;Acc:HGNC:12590]                     |
| WASF2    | WAS protein family member 2 [Source:HGNC Symbol;Acc:HGNC:12733]                                        |
| WFS1     | wolframin ER transmembrane glycoprotein [Source:HGNC Symbol;Acc:HGNC:12762]                            |
| CHPT1    | choline phosphotransferase 1 [Source:HGNC Symbol;Acc:HGNC:17852]                                       |
| EDEM1    | ER degradation enhancing alpha-mannosidase like protein 1 [Source:HGNC Symbol;Acc:HGNC:18967]          |
| EEF1G    | eukaryotic translation elongation factor 1 gamma [Source:HGNC Symbol;Acc:HGNC:3213]                    |
| ERCC4    | ERCC excision repair 4, endonuclease catalytic subunit [Source:HGNC Symbol;Acc:HGNC:3436]              |
| GAA      | glucosidase alpha, acid [Source:HGNC Symbol;Acc:HGNC:4065]                                             |
| MAPK11   | mitogen-activated protein kinase 11 [Source:HGNC Symbol;Acc:HGNC:6873]                                 |
| PPP3R1   | protein phosphatase 3 regulatory subunit B, alpha [Source:HGNC Symbol;Acc:HGNC:9317]                   |
| RPL10A   | ribosomal protein L10a [Source:HGNC Symbol;Acc:HGNC:10299]                                             |

|          |                                                                                              |
|----------|----------------------------------------------------------------------------------------------|
| SGK2     | SGK2, serine/threonine kinase 2 [Source:HGNC Symbol;Acc:HGNC:13900]                          |
| AMH      | anti-Mullerian hormone [Source:HGNC Symbol;Acc:HGNC:464]                                     |
| ATXN3    | ataxin 3 [Source:HGNC Symbol;Acc:HGNC:7106]                                                  |
| BCOR     | BCL6 corepressor [Source:HGNC Symbol;Acc:HGNC:20893]                                         |
| BCR      | BCR, RhoGEF and GTPase activating protein [Source:HGNC Symbol;Acc:HGNC:1014]                 |
| BMPR1B   | bone morphogenetic protein receptor type 1B [Source:HGNC Symbol;Acc:HGNC:1077]               |
| BZW1     | basic leucine zipper and W2 domains 1 [Source:HGNC Symbol;Acc:HGNC:18380]                    |
| DDIAS    | DNA damage induced apoptosis suppressor [Source:HGNC Symbol;Acc:HGNC:26351]                  |
| DDX1     | DEAD/H-box helicase 1 [Source:HGNC Symbol;Acc:HGNC:2734]                                     |
| DNAJC9   | DnaJ heat shock protein family (Hsp40) member C9 [Source:HGNC Symbol;Acc:HGNC:19123]         |
| EIF4G2   | eukaryotic translation initiation factor 4 gamma 2 [Source:HGNC Symbol;Acc:HGNC:3297]        |
| EWSR1    | EWS RNA binding protein 1 [Source:HGNC Symbol;Acc:HGNC:3508]                                 |
| MBD1     | methyl-CpG binding domain protein 1 [Source:HGNC Symbol;Acc:HGNC:6916]                       |
| PPAN     | peter pan homolog (Drosophila) [Source:HGNC Symbol;Acc:HGNC:9227]                            |
| PTPN12   | protein tyrosine phosphatase, non-receptor type 12 [Source:HGNC Symbol;Acc:HGNC:9645]        |
| PTPN21   | protein tyrosine phosphatase, non-receptor type 21 [Source:HGNC Symbol;Acc:HGNC:9651]        |
| PXMP4    | peroxisomal membrane protein 4 [Source:HGNC Symbol;Acc:HGNC:15920]                           |
| RAB3D    | RAB3D, member RAS oncogene family [Source:HGNC Symbol;Acc:HGNC:9779]                         |
| RBM5     | RNA binding motif protein 5 [Source:HGNC Symbol;Acc:HGNC:9902]                               |
| RPTOR    | regulatory associated protein of MTOR complex 1 [Source:HGNC Symbol;Acc:HGNC:30287]          |
| SH3GLB1  | SH3 domain containing GRB2 like endophilin B1 [Source:HGNC Symbol;Acc:HGNC:10833]            |
| SLC7A6   | solute carrier family 7 member 6 [Source:HGNC Symbol;Acc:HGNC:11064]                         |
| STAMBPL1 | STAM binding protein like 1 [Source:HGNC Symbol;Acc:HGNC:24105]                              |
| TICAM1   | toll like receptor adaptor molecule 1 [Source:HGNC Symbol;Acc:HGNC:18348]                    |
| TIFA     | TRAF interacting protein with forkhead associated domain [Source:HGNC Symbol;Acc:HGNC:19075] |
| WNT10B   | Wnt family member 10B [Source:HGNC Symbol;Acc:HGNC:12775]                                    |
| NOV      | nephroblastoma overexpressed [Source:HGNC Symbol;Acc:HGNC:7885]                              |
| COX17    | COX17 cytochrome c oxidase copper chaperone [Source:HGNC Symbol;Acc:HGNC:2264]               |
| IQGAP1   | IQ motif containing GTPase activating protein 1 [Source:HGNC Symbol;Acc:HGNC:6110]           |
| KRT1     | keratin 1 [Source:HGNC Symbol;Acc:HGNC:6412]                                                 |
| NET1     | neuroepithelial cell transforming 1 [Source:HGNC Symbol;Acc:HGNC:14592]                      |
| RPLP0    | ribosomal protein lateral stalk subunit P0 [Source:HGNC Symbol;Acc:HGNC:10371]               |
| SLIT3    | slit guidance ligand 3 [Source:HGNC Symbol;Acc:HGNC:11087]                                   |
| VDAC2    | voltage dependent anion channel 2 [Source:HGNC Symbol;Acc:HGNC:12672]                        |

|         |                                                                                                         |
|---------|---------------------------------------------------------------------------------------------------------|
| VGFB    | VGFB nerve growth factor inducible [Source:HGNC Symbol;Acc:HGNC:12684]                                  |
| ABHD6   | abhydrolase domain containing 6 [Source:HGNC Symbol;Acc:HGNC:21398]                                     |
| ABTB2   | ankyrin repeat and BTB domain containing 2 [Source:HGNC Symbol;Acc:HGNC:23842]                          |
| ANXA11  | annexin A11 [Source:HGNC Symbol;Acc:HGNC:535]                                                           |
| BMP5    | bone morphogenetic protein 5 [Source:HGNC Symbol;Acc:HGNC:1072]                                         |
| BORA    | bora, aurora kinase A activator [Source:HGNC Symbol;Acc:HGNC:24724]                                     |
| CAP2    | CAP, adenylate cyclase-associated protein, 2 (yeast) [Source:HGNC Symbol;Acc:HGNC:20039]                |
| CDCA7L  | cell division cycle associated 7 like [Source:HGNC Symbol;Acc:HGNC:30777]                               |
| CKAP2L  | cytoskeleton associated protein 2 like [Source:HGNC Symbol;Acc:HGNC:26877]                              |
| DSCC1   | DNA replication and sister chromatid cohesion 1 [Source:HGNC Symbol;Acc:HGNC:24453]                     |
| EIF6    | eukaryotic translation initiation factor 6 [Source:HGNC Symbol;Acc:HGNC:6159]                           |
| FGF10   | fibroblast growth factor 10 [Source:HGNC Symbol;Acc:HGNC:3666]                                          |
| FXD2    | FXD domain containing ion transport regulator 2 [Source:HGNC Symbol;Acc:HGNC:4026]                      |
| GALNT10 | polypeptide N-acetylgalactosaminyltransferase 10 [Source:HGNC Symbol;Acc:HGNC:19873]                    |
| GRIN1   | glutamate ionotropic receptor NMDA type subunit associated protein 1 [Source:HGNC Symbol;Acc:HGNC:4589] |
| INTS6   | integrator complex subunit 6 [Source:HGNC Symbol;Acc:HGNC:14879]                                        |
| KCNA5   | potassium voltage-gated channel subfamily A member 5 [Source:HGNC Symbol;Acc:HGNC:6224]                 |
| LPGAT1  | lysophosphatidylglycerol acyltransferase 1 [Source:HGNC Symbol;Acc:HGNC:28985]                          |
| MBD2    | methyl-CpG binding domain protein 2 [Source:HGNC Symbol;Acc:HGNC:6917]                                  |
| NELL2   | neural EGFL like 2 [Source:HGNC Symbol;Acc:HGNC:7751]                                                   |
| NUP153  | nucleoporin 153 [Source:HGNC Symbol;Acc:HGNC:8062]                                                      |
| PGM2L1  | phosphoglucomutase 2-like 1 [Source:HGNC Symbol;Acc:HGNC:20898]                                         |
| PRPF4B  | pre-mRNA processing factor 4B [Source:HGNC Symbol;Acc:HGNC:17346]                                       |
| PUS1    | pseudouridylate synthase 1 [Source:HGNC Symbol;Acc:HGNC:15508]                                          |
| RAB14   | RAB14, member RAS oncogene family [Source:HGNC Symbol;Acc:HGNC:16524]                                   |
| RAD54B  | RAD54 homolog B (S. cerevisiae) [Source:HGNC Symbol;Acc:HGNC:17228]                                     |
| RBM24   | RNA binding motif protein 24 [Source:HGNC Symbol;Acc:HGNC:21539]                                        |
| RPF2    | ribosome production factor 2 homolog [Source:HGNC Symbol;Acc:HGNC:20870]                                |
| SCARA5  | scavenger receptor class A member 5 [Source:HGNC Symbol;Acc:HGNC:28701]                                 |
| SEC31A  | SEC31 homolog A, COPII coat complex component [Source:HGNC Symbol;Acc:HGNC:17052]                       |
| SLC12A7 | solute carrier family 12 member 7 [Source:HGNC Symbol;Acc:HGNC:10915]                                   |
| SLC27A4 | solute carrier family 27 member 4 [Source:HGNC Symbol;Acc:HGNC:10998]                                   |
| SLC2A9  | solute carrier family 2 member 9 [Source:HGNC Symbol;Acc:HGNC:13446]                                    |
| SRI     | sorcin [Source:HGNC Symbol;Acc:HGNC:11292]                                                              |
| SYVN1   | synoviolin 1 [Source:HGNC Symbol;Acc:HGNC:20738]                                                        |
| TMED10  | transmembrane p24 trafficking protein 10 [Source:HGNC Symbol;Acc:HGNC:16998]                            |



|          |                                                                                                                                                               |
|----------|---------------------------------------------------------------------------------------------------------------------------------------------------------------|
| TRIM28   | tripartite motif containing 28 [Source:HGNC Symbol;Acc:HGNC:16384]                                                                                            |
| UBA7     | ubiquitin like modifier activating enzyme 7 [Source:HGNC Symbol;Acc:HGNC:12471]                                                                               |
| UBE3A    | ubiquitin protein ligase E3A [Source:HGNC Symbol;Acc:HGNC:12496]                                                                                              |
| ZC3HAV1  | zinc finger CCCH-type containing, antiviral 1 [Source:HGNC Symbol;Acc:HGNC:23721]                                                                             |
| CCT5     | chaperonin containing TCP1 subunit 5 [Source:HGNC Symbol;Acc:HGNC:1618]                                                                                       |
| CSAD     | cysteine sulfinic acid decarboxylase [Source:HGNC Symbol;Acc:HGNC:18966]                                                                                      |
| DBH      | dopamine beta-hydroxylase [Source:HGNC Symbol;Acc:HGNC:2689]                                                                                                  |
| EDNRB    | endothelin receptor type B [Source:HGNC Symbol;Acc:HGNC:3180]                                                                                                 |
| GART     | phosphoribosylglycinamide formyltransferase, phosphoribosylglycinamide synthetase, phosphoribosylaminoimidazole synthetase [Source:HGNC Symbol;Acc:HGNC:4163] |
| HSDL2    | hydroxysteroid dehydrogenase like 2 [Source:HGNC Symbol;Acc:HGNC:18572]                                                                                       |
| IFITM2   | interferon induced transmembrane protein 2 [Source:HGNC Symbol;Acc:HGNC:5413]                                                                                 |
| JMJD6    | arginine demethylase and lysine hydroxylase [Source:HGNC Symbol;Acc:HGNC:19355]                                                                               |
| LRG1     | leucine rich alpha-2-glycoprotein 1 [Source:HGNC Symbol;Acc:HGNC:29480]                                                                                       |
| MDH2     | malate dehydrogenase 2 [Source:HGNC Symbol;Acc:HGNC:6971]                                                                                                     |
| PSMA4    | proteasome subunit alpha 4 [Source:HGNC Symbol;Acc:HGNC:9533]                                                                                                 |
| ABCD2    | ATP binding cassette subfamily D member 2 [Source:HGNC Symbol;Acc:HGNC:66]                                                                                    |
| ACOT9    | acyl-CoA thioesterase 9 [Source:HGNC Symbol;Acc:HGNC:17152]                                                                                                   |
| ACTN4    | actinin alpha 4 [Source:HGNC Symbol;Acc:HGNC:166]                                                                                                             |
| ADGRE5   | adhesion G protein-coupled receptor E5 [Source:HGNC Symbol;Acc:HGNC:1711]                                                                                     |
| CYC1     | cytochrome c1 [Source:HGNC Symbol;Acc:HGNC:2579]                                                                                                              |
| ENDOD1   | endonuclease domain containing 1 [Source:HGNC Symbol;Acc:HGNC:29129]                                                                                          |
| FRMD6    | FERM domain containing 6 [Source:HGNC Symbol;Acc:HGNC:19839]                                                                                                  |
| GJA4     | gap junction protein alpha 4 [Source:HGNC Symbol;Acc:HGNC:4278]                                                                                               |
| GLIPR2   | GLI pathogenesis related 2 [Source:HGNC Symbol;Acc:HGNC:18007]                                                                                                |
| MRPL12   | mitochondrial ribosomal protein L12 [Source:HGNC Symbol;Acc:HGNC:10378]                                                                                       |
| NDUFA2   | NADH:ubiquinone oxidoreductase subunit A2 [Source:HGNC Symbol;Acc:HGNC:7685]                                                                                  |
| NDUFB8   | NADH:ubiquinone oxidoreductase subunit B8 [Source:HGNC Symbol;Acc:HGNC:7703]                                                                                  |
| PLIN4    | perilipin 4 [Source:HGNC Symbol;Acc:HGNC:29393]                                                                                                               |
| RNASEH2A | ribonuclease H2 subunit A [Source:HGNC Symbol;Acc:HGNC:18518]                                                                                                 |
| SGK3     | serum/glucocorticoid regulated kinase family member 3 [Source:HGNC Symbol;Acc:HGNC:10812]                                                                     |
| ADCY7    | adenylate cyclase 7 [Source:HGNC Symbol;Acc:HGNC:238]                                                                                                         |
| ADK      | adenosine kinase [Source:HGNC Symbol;Acc:HGNC:257]                                                                                                            |
| ELL2     | elongation factor for RNA polymerase II 2 [Source:HGNC Symbol;Acc:HGNC:17064]                                                                                 |
| FBXO30   | F-box protein 30 [Source:HGNC Symbol;Acc:HGNC:15600]                                                                                                          |
| PSMC5    | proteasome 26S subunit, ATPase 5 [Source:HGNC Symbol;Acc:HGNC:9552]                                                                                           |
| RAMP1    | receptor activity modifying protein 1 [Source:HGNC Symbol;Acc:HGNC:9843]                                                                                      |
| SGMS1    | sphingomyelin synthase 1 [Source:HGNC Symbol;Acc:HGNC:29799]                                                                                                  |
| TNS3     | tensin 3 [Source:HGNC Symbol;Acc:HGNC:21616]                                                                                                                  |
| AKT1S1   | AKT1 substrate 1 [Source:HGNC Symbol;Acc:HGNC:28426]                                                                                                          |

|          |                                                                                              |
|----------|----------------------------------------------------------------------------------------------|
| ASAP1    | ArfGAP with SH3 domain, ankyrin repeat and PH domain 1 [Source:HGNC Symbol;Acc:HGNC:2720]    |
| ATF1     | activating transcription factor 1 [Source:HGNC Symbol;Acc:HGNC:783]                          |
| ATOX1    | antioxidant 1 copper chaperone [Source:HGNC Symbol;Acc:HGNC:798]                             |
| BAP1     | BRCA1 associated protein 1 [Source:HGNC Symbol;Acc:HGNC:950]                                 |
| CCL1     | C-C motif chemokine ligand 1 [Source:HGNC Symbol;Acc:HGNC:10609]                             |
| CDV3     | CDV3 homolog [Source:HGNC Symbol;Acc:HGNC:26928]                                             |
| COX6B1   | cytochrome c oxidase subunit 6B1 [Source:HGNC Symbol;Acc:HGNC:2280]                          |
| COX7B    | cytochrome c oxidase subunit 7B [Source:HGNC Symbol;Acc:HGNC:2291]                           |
| DEPDC1   | DEP domain containing 1 [Source:HGNC Symbol;Acc:HGNC:22949]                                  |
| DHODH    | dihydroorotate dehydrogenase (quinone) [Source:HGNC Symbol;Acc:HGNC:2867]                    |
| DHRS2    | dehydrogenase/reductase 2 [Source:HGNC Symbol;Acc:HGNC:18349]                                |
| FANCG    | Fanconi anemia complementation group G [Source:HGNC Symbol;Acc:HGNC:3588]                    |
| FUCA1    | fucosidase, alpha-L- 1, tissue [Source:HGNC Symbol;Acc:HGNC:4006]                            |
| GPSM2    | G-protein signaling modulator 2 [Source:HGNC Symbol;Acc:HGNC:29501]                          |
| GYS1     | glycogen synthase 1 [Source:HGNC Symbol;Acc:HGNC:4706]                                       |
| HDGF     | hepatoma-derived growth factor [Source:HGNC Symbol;Acc:HGNC:4856]                            |
| HSD17B12 | hydroxysteroid 17-beta dehydrogenase 12 [Source:HGNC Symbol;Acc:HGNC:18646]                  |
| IGF2BP3  | insulin like growth factor 2 mRNA binding protein 3 [Source:HGNC Symbol;Acc:HGNC:28868]      |
| KCNB1    | potassium voltage-gated channel subfamily B member 1 [Source:HGNC Symbol;Acc:HGNC:6231]      |
| MAG      | myelin associated glycoprotein [Source:HGNC Symbol;Acc:HGNC:6783]                            |
| MPZL2    | myelin protein zero like 2 [Source:HGNC Symbol;Acc:HGNC:3496]                                |
| MYOD1    | myogenic differentiation 1 [Source:HGNC Symbol;Acc:HGNC:7611]                                |
| NDUFA5   | NADH:ubiquinone oxidoreductase subunit A5 [Source:HGNC Symbol;Acc:HGNC:7688]                 |
| NDUFV2   | NADH:ubiquinone oxidoreductase core subunit V2 [Source:HGNC Symbol;Acc:HGNC:7717]            |
| NTN4     | netrin 4 [Source:HGNC Symbol;Acc:HGNC:13658]                                                 |
| PIDD1    | p53-induced death domain protein 1 [Source:HGNC Symbol;Acc:HGNC:16491]                       |
| PKIB     | protein kinase (cAMP-dependent, catalytic) inhibitor beta [Source:HGNC Symbol;Acc:HGNC:9018] |
| PMS1     | PMS1 homolog 1, mismatch repair system component [Source:HGNC Symbol;Acc:HGNC:9121]          |
| PRKCI    | protein kinase C iota [Source:HGNC Symbol;Acc:HGNC:9404]                                     |
| SLC12A4  | solute carrier family 12 member 4 [Source:HGNC Symbol;Acc:HGNC:10913]                        |
| SSX2IP   | SSX family member 2 interacting protein [Source:HGNC Symbol;Acc:HGNC:16509]                  |
| TIMP4    | TIMP metalloproteinase inhibitor 4 [Source:HGNC Symbol;Acc:HGNC:11823]                       |
| TIPIN    | TIMELESS interacting protein [Source:HGNC Symbol;Acc:HGNC:30750]                             |
| XRCC2    | X-ray repair cross complementing 2 [Source:HGNC Symbol;Acc:HGNC:12829]                       |
| ZCCHC7   | zinc finger CCHC-type containing 7 [Source:HGNC Symbol;Acc:HGNC:26209]                       |
| ZFR      | zinc finger RNA binding protein [Source:HGNC Symbol;Acc:HGNC:17277]                          |
| CDA      | cytidine deaminase [Source:HGNC Symbol;Acc:HGNC:1712]                                        |

|         |                                                                                                     |
|---------|-----------------------------------------------------------------------------------------------------|
| CRYL1   | crystallin lambda 1 [Source:HGNC Symbol;Acc:HGNC:18246]                                             |
| HIGD1A  | HIG1 hypoxia inducible domain family member 1A [Source:HGNC Symbol;Acc:HGNC:29527]                  |
| IGFALS  | insulin like growth factor binding protein acid labile subunit [Source:HGNC Symbol;Acc:HGNC:5468]   |
| LASP1   | LIM and SH3 protein 1 [Source:HGNC Symbol;Acc:HGNC:6513]                                            |
| PTAFR   | platelet activating factor receptor [Source:HGNC Symbol;Acc:HGNC:9582]                              |
| SLC5A3  | solute carrier family 5 member 3 [Source:HGNC Symbol;Acc:HGNC:11038]                                |
| SLCO4A1 | solute carrier organic anion transporter family member 4A1 [Source:HGNC Symbol;Acc:HGNC:10953]      |
| TM4SF1  | transmembrane 4 L six family member 1 [Source:HGNC Symbol;Acc:HGNC:11853]                           |
| APRT    | adenine phosphoribosyltransferase [Source:HGNC Symbol;Acc:HGNC:626]                                 |
| BLNK    | B-cell linker [Source:HGNC Symbol;Acc:HGNC:14211]                                                   |
| WISP1   | WNT1 inducible signaling pathway protein 1 [Source:HGNC Symbol;Acc:HGNC:12769]                      |
| CCR6    | C-C motif chemokine receptor 6 [Source:HGNC Symbol;Acc:HGNC:1607]                                   |
| CSNK2A2 | casein kinase 2 alpha 2 [Source:HGNC Symbol;Acc:HGNC:2459]                                          |
| DDAH2   | dimethylarginine dimethylaminohydrolase 2 [Source:HGNC Symbol;Acc:HGNC:2716]                        |
| DNM2    | dynamin 2 [Source:HGNC Symbol;Acc:HGNC:2974]                                                        |
| FGF8    | fibroblast growth factor 8 [Source:HGNC Symbol;Acc:HGNC:3686]                                       |
| GAB1    | GRB2 associated binding protein 1 [Source:HGNC Symbol;Acc:HGNC:4066]                                |
| GPLD1   | glycosylphosphatidylinositol specific phospholipase D1 [Source:HGNC Symbol;Acc:HGNC:4459]           |
| HJURP   | Holliday junction recognition protein [Source:HGNC Symbol;Acc:HGNC:25444]                           |
| NEIL3   | nei like DNA glycosylase 3 [Source:HGNC Symbol;Acc:HGNC:24573]                                      |
| PAPSS1  | 3'-phosphoadenosine 5'-phosphosulfate synthase 1 [Source:HGNC Symbol;Acc:HGNC:8603]                 |
| PIM3    | Pim-3 proto-oncogene, serine/threonine kinase [Source:HGNC Symbol;Acc:HGNC:19310]                   |
| PLP2    | proteolipid protein 2 [Source:HGNC Symbol;Acc:HGNC:9087]                                            |
| PSEN2   | presenilin 2 [Source:HGNC Symbol;Acc:HGNC:9509]                                                     |
| PTGER1  | prostaglandin E receptor 1 [Source:HGNC Symbol;Acc:HGNC:9593]                                       |
| RAB8B   | RAB8B, member RAS oncogene family [Source:HGNC Symbol;Acc:HGNC:30273]                               |
| RAPH1   | Ras association (RalGDS/AF-6) and pleckstrin homology domains 1 [Source:HGNC Symbol;Acc:HGNC:14436] |
| RFTN1   | raftlin, lipid raft linker 1 [Source:HGNC Symbol;Acc:HGNC:30278]                                    |
| SACS    | sacsin molecular chaperone [Source:HGNC Symbol;Acc:HGNC:10519]                                      |
| SEL1L   | SEL1L ERAD E3 ligase adaptor subunit [Source:HGNC Symbol;Acc:HGNC:10717]                            |
| TAPBP   | TAP binding protein (tapasin) [Source:HGNC Symbol;Acc:HGNC:11566]                                   |
| TRIM59  | tripartite motif containing 59 [Source:HGNC Symbol;Acc:HGNC:30834]                                  |
| TUFM    | Tu translation elongation factor, mitochondrial [Source:HGNC Symbol;Acc:HGNC:12420]                 |
| UAP1    | UDP-N-acetylglucosamine pyrophosphorylase 1 [Source:HGNC Symbol;Acc:HGNC:12457]                     |

|          |                                                                                                   |
|----------|---------------------------------------------------------------------------------------------------|
| ZFAND5   | zinc finger AN1-type containing 5 [Source:HGNC Symbol;Acc:HGNC:13008]                             |
| DTL      | denticleless E3 ubiquitin protein ligase homolog [Source:HGNC Symbol;Acc:HGNC:30288]              |
| HSD17B10 | hydroxysteroid 17-beta dehydrogenase 10 [Source:HGNC Symbol;Acc:HGNC:4800]                        |
| LY6E     | lymphocyte antigen 6 complex, locus E [Source:HGNC Symbol;Acc:HGNC:6727]                          |
| MAFK     | MAF bZIP transcription factor K [Source:HGNC Symbol;Acc:HGNC:6782]                                |
| MAP3K6   | mitogen-activated protein kinase kinase kinase 6 [Source:HGNC Symbol;Acc:HGNC:6858]               |
| PSMA1    | proteasome subunit alpha 1 [Source:HGNC Symbol;Acc:HGNC:9530]                                     |
| SLC39A10 | solute carrier family 39 member 10 [Source:HGNC Symbol;Acc:HGNC:20861]                            |
| SRSF2    | serine and arginine rich splicing factor 2 [Source:HGNC Symbol;Acc:HGNC:10783]                    |
| XPA      | XPA, DNA damage recognition and repair factor [Source:HGNC Symbol;Acc:HGNC:12814]                 |
| ADAM10   | ADAM metallopeptidase domain 10 [Source:HGNC Symbol;Acc:HGNC:188]                                 |
| ALOX12   | arachidonate 12-lipoxygenase, 12S type [Source:HGNC Symbol;Acc:HGNC:429]                          |
| ARHGAP5  | Rho GTPase activating protein 5 [Source:HGNC Symbol;Acc:HGNC:675]                                 |
| CORO1C   | coronin 1C [Source:HGNC Symbol;Acc:HGNC:2254]                                                     |
| CXCR3    | C-X-C motif chemokine receptor 3 [Source:HGNC Symbol;Acc:HGNC:4540]                               |
| FAM107B  | family with sequence similarity 107 member B [Source:HGNC Symbol;Acc:HGNC:23726]                  |
| FGD4     | FYVE, RhoGEF and PH domain containing 4 [Source:HGNC Symbol;Acc:HGNC:19125]                       |
| INPP4B   | inositol polyphosphate-4-phosphatase type II B [Source:HGNC Symbol;Acc:HGNC:6075]                 |
| NKX3-1   | NK3 homeobox 1 [Source:HGNC Symbol;Acc:HGNC:7838]                                                 |
| PDX1     | pancreatic and duodenal homeobox 1 [Source:HGNC Symbol;Acc:HGNC:6107]                             |
| PID1     | phosphotyrosine interaction domain containing 1 [Source:HGNC Symbol;Acc:HGNC:26084]               |
| PLXNB2   | plexin B2 [Source:HGNC Symbol;Acc:HGNC:9104]                                                      |
| PPAT     | phosphoribosyl pyrophosphate amidotransferase [Source:HGNC Symbol;Acc:HGNC:9238]                  |
| PRKAR2A  | protein kinase cAMP-dependent type II regulatory subunit alpha [Source:HGNC Symbol;Acc:HGNC:9391] |
| PRPS2    | phosphoribosyl pyrophosphate synthetase 2 [Source:HGNC Symbol;Acc:HGNC:9465]                      |
| RAB20    | RAB20, member RAS oncogene family [Source:HGNC Symbol;Acc:HGNC:18260]                             |
| RAD54L   | RAD54-like ( <i>S. cerevisiae</i> ) [Source:HGNC Symbol;Acc:HGNC:9826]                            |
| RHOBTB1  | Rho related BTB domain containing 1 [Source:HGNC Symbol;Acc:HGNC:18738]                           |
| RPA3     | replication protein A3 [Source:HGNC Symbol;Acc:HGNC:10291]                                        |
| SDS      | serine dehydratase [Source:HGNC Symbol;Acc:HGNC:10691]                                            |
| STK39    | serine/threonine kinase 39 [Source:HGNC Symbol;Acc:HGNC:17717]                                    |
| STRBP    | spermatid perinuclear RNA binding protein [Source:HGNC Symbol;Acc:HGNC:16462]                     |
| TCF12    | transcription factor 12 [Source:HGNC Symbol;Acc:HGNC:11623]                                       |
| TLR5     | toll like receptor 5 [Source:HGNC Symbol;Acc:HGNC:11851]                                          |
| TROAP    | trophinin associated protein [Source:HGNC Symbol;Acc:HGNC:12327]                                  |
| VAMP2    | vesicle associated membrane protein 2 [Source:HGNC Symbol;Acc:HGNC:12643]                         |

|           |                                                                                                         |
|-----------|---------------------------------------------------------------------------------------------------------|
| ZWILCH    | zwilch kinetochore protein [Source:HGNC Symbol;Acc:HGNC:25468]                                          |
| CYP3A5    | cytochrome P450 family 3 subfamily A member 5 [Source:HGNC Symbol;Acc:HGNC:2638]                        |
| NCAPD2    | non-SMC condensin I complex subunit D2 [Source:HGNC Symbol;Acc:HGNC:24305]                              |
| ZFP36L2   | ZFP36 ring finger protein-like 2 [Source:HGNC Symbol;Acc:HGNC:1108]                                     |
| ADCY9     | adenylate cyclase 9 [Source:HGNC Symbol;Acc:HGNC:240]                                                   |
| CD53      | CD53 molecule [Source:HGNC Symbol;Acc:HGNC:1686]                                                        |
| CDC34     | cell division cycle 34 [Source:HGNC Symbol;Acc:HGNC:1734]                                               |
| CENPW     | centromere protein W [Source:HGNC Symbol;Acc:HGNC:21488]                                                |
| CHRNA5    | cholinergic receptor nicotinic alpha 5 subunit [Source:HGNC Symbol;Acc:HGNC:1959]                       |
| CORO2A    | coronin 2A [Source:HGNC Symbol;Acc:HGNC:2255]                                                           |
| CUX1      | cut like homeobox 1 [Source:HGNC Symbol;Acc:HGNC:2557]                                                  |
| DPP7      | dipeptidyl peptidase 7 [Source:HGNC Symbol;Acc:HGNC:14892]                                              |
| EPHA1     | EPH receptor A1 [Source:HGNC Symbol;Acc:HGNC:3385]                                                      |
| FAM107A   | family with sequence similarity 107 member A [Source:HGNC Symbol;Acc:HGNC:30827]                        |
| FGR       | FGR proto-oncogene, Src family tyrosine kinase [Source:HGNC Symbol;Acc:HGNC:3697]                       |
| FOXN3     | forkhead box N3 [Source:HGNC Symbol;Acc:HGNC:1928]                                                      |
| GFPT2     | glutamine-fructose-6-phosphate transaminase 2 [Source:HGNC Symbol;Acc:HGNC:4242]                        |
| HMG2      | high mobility group nucleosomal binding domain 2 [Source:HGNC Symbol;Acc:HGNC:4986]                     |
| MRPS18B   | mitochondrial ribosomal protein S18B [Source:HGNC Symbol;Acc:HGNC:14516]                                |
| PFKFB1    | 6-phosphofructo-2-kinase/fructose-2,6-biphosphatase 1 [Source:HGNC Symbol;Acc:HGNC:8872]                |
| PHLDB2    | pleckstrin homology like domain family B member 2 [Source:HGNC Symbol;Acc:HGNC:29573]                   |
| PPM1A     | protein phosphatase, Mg <sup>2+</sup> /Mn <sup>2+</sup> dependent 1A [Source:HGNC Symbol;Acc:HGNC:9275] |
| PRDM16    | PR domain 16 [Source:HGNC Symbol;Acc:HGNC:14000]                                                        |
| PSMC3IP   | PSMC3 interacting protein [Source:HGNC Symbol;Acc:HGNC:17928]                                           |
| PTPRE     | protein tyrosine phosphatase, receptor type E [Source:HGNC Symbol;Acc:HGNC:9669]                        |
| PXDN      | peroxidasin [Source:HGNC Symbol;Acc:HGNC:14966]                                                         |
| RAD18     | RAD18, E3 ubiquitin protein ligase [Source:HGNC Symbol;Acc:HGNC:18278]                                  |
| REEP5     | receptor accessory protein 5 [Source:HGNC Symbol;Acc:HGNC:30077]                                        |
| SAMD4A    | sterile alpha motif domain containing 4A [Source:HGNC Symbol;Acc:HGNC:23023]                            |
| SFTPB     | surfactant protein B [Source:HGNC Symbol;Acc:HGNC:10801]                                                |
| SFXN2     | sideroflexin 2 [Source:HGNC Symbol;Acc:HGNC:16086]                                                      |
| STBD1     | starch binding domain 1 [Source:HGNC Symbol;Acc:HGNC:24854]                                             |
| TJP3      | tight junction protein 3 [Source:HGNC Symbol;Acc:HGNC:11829]                                            |
| TNFRSF11A | tumor necrosis factor receptor superfamily member 11a [Source:HGNC Symbol;Acc:HGNC:11908]               |
| UBE2H     | ubiquitin conjugating enzyme E2 H [Source:HGNC Symbol;Acc:HGNC:12484]                                   |

|         |                                                                                                       |
|---------|-------------------------------------------------------------------------------------------------------|
| USP7    | ubiquitin specific peptidase 7 (herpes virus-associated) [Source:HGNC Symbol;Acc:HGNC:12630]          |
| CNN1    | calponin 1 [Source:HGNC Symbol;Acc:HGNC:2155]                                                         |
| DNAJB6  | DnaJ heat shock protein family (Hsp40) member B6 [Source:HGNC Symbol;Acc:HGNC:14888]                  |
| GC      | GC, vitamin D binding protein [Source:HGNC Symbol;Acc:HGNC:4187]                                      |
| HES6    | hes family bHLH transcription factor 6 [Source:HGNC Symbol;Acc:HGNC:18254]                            |
| HHEX    | hematopoietically expressed homeobox [Source:HGNC Symbol;Acc:HGNC:4901]                               |
| LRP2    | LDL receptor related protein 2 [Source:HGNC Symbol;Acc:HGNC:6694]                                     |
| MYLIP   | myosin regulatory light chain interacting protein [Source:HGNC Symbol;Acc:HGNC:21155]                 |
| OPRD1   | opioid receptor delta 1 [Source:HGNC Symbol;Acc:HGNC:8153]                                            |
| PSMA2   | proteasome subunit alpha 2 [Source:HGNC Symbol;Acc:HGNC:9531]                                         |
| RSRP1   | arginine and serine rich protein 1 [Source:HGNC Symbol;Acc:HGNC:25234]                                |
| SFRP2   | secreted frizzled related protein 2 [Source:HGNC Symbol;Acc:HGNC:10777]                               |
| SPON2   | spondin 2 [Source:HGNC Symbol;Acc:HGNC:11253]                                                         |
| TNFAIP8 | TNF alpha induced protein 8 [Source:HGNC Symbol;Acc:HGNC:17260]                                       |
| AGR2    | anterior gradient 2, protein disulphide isomerase family member [Source:HGNC Symbol;Acc:HGNC:328]     |
| ALDH9A1 | aldehyde dehydrogenase 9 family member A1 [Source:HGNC Symbol;Acc:HGNC:412]                           |
| CSE1L   | chromosome segregation 1 like [Source:HGNC Symbol;Acc:HGNC:2431]                                      |
| DBT     | dihydrolipoamide branched chain transacylase E2 [Source:HGNC Symbol;Acc:HGNC:2698]                    |
| DOCK8   | dedicator of cytokinesis 8 [Source:HGNC Symbol;Acc:HGNC:19191]                                        |
| EI24    | EI24, autophagy associated transmembrane protein [Source:HGNC Symbol;Acc:HGNC:13276]                  |
| ERCC6L  | ERCC excision repair 6 like, spindle assembly checkpoint helicase [Source:HGNC Symbol;Acc:HGNC:20794] |
| IL17RB  | interleukin 17 receptor B [Source:HGNC Symbol;Acc:HGNC:18015]                                         |
| IRF2BP2 | interferon regulatory factor 2 binding protein 2 [Source:HGNC Symbol;Acc:HGNC:21729]                  |
| KCNJ11  | potassium voltage-gated channel subfamily J member 11 [Source:HGNC Symbol;Acc:HGNC:6257]              |
| LONP1   | lon peptidase 1, mitochondrial [Source:HGNC Symbol;Acc:HGNC:9479]                                     |
| LPP     | LIM domain containing preferred translocation partner in lipoma [Source:HGNC Symbol;Acc:HGNC:6679]    |
| MATR3   | matrin 3 [Source:HGNC Symbol;Acc:HGNC:6912]                                                           |
| MRPS6   | mitochondrial ribosomal protein S6 [Source:HGNC Symbol;Acc:HGNC:14051]                                |
| MYO10   | myosin X [Source:HGNC Symbol;Acc:HGNC:7593]                                                           |
| NCOA4   | nuclear receptor coactivator 4 [Source:HGNC Symbol;Acc:HGNC:7671]                                     |
| NTRK3   | neurotrophic receptor tyrosine kinase 3 [Source:HGNC Symbol;Acc:HGNC:8033]                            |
| OSBPL3  | oxysterol binding protein like 3 [Source:HGNC Symbol;Acc:HGNC:16370]                                  |
| RAB27B  | RAB27B, member RAS oncogene family [Source:HGNC Symbol;Acc:HGNC:9767]                                 |
| RPS3A   | ribosomal protein S3A [Source:HGNC Symbol;Acc:HGNC:10421]                                             |

|         |                                                                                                                    |
|---------|--------------------------------------------------------------------------------------------------------------------|
| SF1     | splicing factor 1 [Source:HGNC Symbol;Acc:HGNC:12950]                                                              |
| SGO1    | shugoshin 1 [Source:HGNC Symbol;Acc:HGNC:25088]                                                                    |
| SLC41A2 | solute carrier family 41 member 2 [Source:HGNC Symbol;Acc:HGNC:31045]                                              |
| SP3     | Sp3 transcription factor [Source:HGNC Symbol;Acc:HGNC:11208]                                                       |
| ST13    | suppression of tumorigenicity 13 (colon carcinoma) (Hsp70 interacting protein) [Source:HGNC Symbol;Acc:HGNC:11343] |
| TBX21   | T-box 21 [Source:HGNC Symbol;Acc:HGNC:11599]                                                                       |
| TCP11L2 | t-complex 11 like 2 [Source:HGNC Symbol;Acc:HGNC:28627]                                                            |
| TSC1    | tuberous sclerosis 1 [Source:HGNC Symbol;Acc:HGNC:12362]                                                           |
| YBX1    | Y-box binding protein 1 [Source:HGNC Symbol;Acc:HGNC:8014]                                                         |
| ACTG2   | actin, gamma 2, smooth muscle, enteric [Source:HGNC Symbol;Acc:HGNC:145]                                           |
| AMBP    | alpha-1-microglobulin/bikunin precursor [Source:HGNC Symbol;Acc:HGNC:453]                                          |
| CRAT    | carnitine O-acetyltransferase [Source:HGNC Symbol;Acc:HGNC:2342]                                                   |
| CSRP2   | cysteine and glycine rich protein 2 [Source:HGNC Symbol;Acc:HGNC:2470]                                             |
| KRT17   | keratin 17 [Source:HGNC Symbol;Acc:HGNC:6427]                                                                      |
| LGMN    | legumain [Source:HGNC Symbol;Acc:HGNC:9472]                                                                        |
| MT1G    | metallothionein 1G [Source:HGNC Symbol;Acc:HGNC:7399]                                                              |
| OSMR    | oncostatin M receptor [Source:HGNC Symbol;Acc:HGNC:8507]                                                           |
| PVR     | poliovirus receptor [Source:HGNC Symbol;Acc:HGNC:9705]                                                             |
| RPL13   | ribosomal protein L13 [Source:HGNC Symbol;Acc:HGNC:10303]                                                          |
| SLC27A1 | solute carrier family 27 member 1 [Source:HGNC Symbol;Acc:HGNC:10995]                                              |
| ACOT4   | acyl-CoA thioesterase 4 [Source:HGNC Symbol;Acc:HGNC:19748]                                                        |
| ACOT7   | acyl-CoA thioesterase 7 [Source:HGNC Symbol;Acc:HGNC:24157]                                                        |
| AKT3    | AKT serine/threonine kinase 3 [Source:HGNC Symbol;Acc:HGNC:393]                                                    |
| CLIP1   | CAP-Gly domain containing linker protein 1 [Source:HGNC Symbol;Acc:HGNC:10461]                                     |
| COMTD1  | catechol-O-methyltransferase domain containing 1 [Source:HGNC Symbol;Acc:HGNC:26309]                               |
| CRIM1   | cysteine rich transmembrane BMP regulator 1 (chordin-like) [Source:HGNC Symbol;Acc:HGNC:2359]                      |
| ELOVL3  | ELOVL fatty acid elongase 3 [Source:HGNC Symbol;Acc:HGNC:18047]                                                    |
| ENTPD1  | ectonucleoside triphosphate diphosphohydrolase 1 [Source:HGNC Symbol;Acc:HGNC:3363]                                |
| FGL1    | fibrinogen like 1 [Source:HGNC Symbol;Acc:HGNC:3695]                                                               |
| GGH     | gamma-glutamyl hydrolase [Source:HGNC Symbol;Acc:HGNC:4248]                                                        |
| HHIP    | hedgehog interacting protein [Source:HGNC Symbol;Acc:HGNC:14866]                                                   |
| KNTC1   | kinetochore associated 1 [Source:HGNC Symbol;Acc:HGNC:17255]                                                       |
| MAP2K5  | mitogen-activated protein kinase kinase 5 [Source:HGNC Symbol;Acc:HGNC:6845]                                       |
| MYBBP1A | MYB binding protein 1a [Source:HGNC Symbol;Acc:HGNC:7546]                                                          |
| MYH11   | myosin, heavy chain 11, smooth muscle [Source:HGNC Symbol;Acc:HGNC:7569]                                           |
| NFE2L1  | nuclear factor, erythroid 2 like 1 [Source:HGNC Symbol;Acc:HGNC:7781]                                              |
| PPP2CB  | protein phosphatase 2 catalytic subunit beta [Source:HGNC Symbol;Acc:HGNC:9300]                                    |
| PRDM2   | PR domain 2 [Source:HGNC Symbol;Acc:HGNC:9347]                                                                     |

|         |                                                                                                   |
|---------|---------------------------------------------------------------------------------------------------|
| PRKAB2  | protein kinase AMP-activated non-catalytic subunit beta 2 [Source:HGNC Symbol;Acc:HGNC:9379]      |
| PRKCG   | protein kinase C gamma [Source:HGNC Symbol;Acc:HGNC:9402]                                         |
| PRKD1   | protein kinase D1 [Source:HGNC Symbol;Acc:HGNC:9407]                                              |
| PSMC6   | proteasome 26S subunit, ATPase 6 [Source:HGNC Symbol;Acc:HGNC:9553]                               |
| PSME4   | proteasome activator subunit 4 [Source:HGNC Symbol;Acc:HGNC:20635]                                |
| RFC5    | replication factor C subunit 5 [Source:HGNC Symbol;Acc:HGNC:9973]                                 |
| RHOQ    | ras homolog family member Q [Source:HGNC Symbol;Acc:HGNC:17736]                                   |
| SCPEP1  | serine carboxypeptidase 1 [Source:HGNC Symbol;Acc:HGNC:29507]                                     |
| SRRM2   | serine/arginine repetitive matrix 2 [Source:HGNC Symbol;Acc:HGNC:16639]                           |
| TFAP2C  | transcription factor AP-2 gamma [Source:HGNC Symbol;Acc:HGNC:11744]                               |
| TOMM20  | translocase of outer mitochondrial membrane 20 [Source:HGNC Symbol;Acc:HGNC:20947]                |
| TPMT    | thiopurine S-methyltransferase [Source:HGNC Symbol;Acc:HGNC:12014]                                |
| YPEL5   | yippee like 5 [Source:HGNC Symbol;Acc:HGNC:18329]                                                 |
| ZDHHC2  | zinc finger DHHC-type containing 2 [Source:HGNC Symbol;Acc:HGNC:18469]                            |
| AKR1D1  | aldo-keto reductase family 1 member D1 [Source:HGNC Symbol;Acc:HGNC:388]                          |
| ATP2B1  | ATPase plasma membrane Ca2+ transporting 1 [Source:HGNC Symbol;Acc:HGNC:814]                      |
| ECHS1   | enoyl-CoA hydratase, short chain, 1, mitochondrial [Source:HGNC Symbol;Acc:HGNC:3151]             |
| FKBP1A  | FK506 binding protein 1A [Source:HGNC Symbol;Acc:HGNC:3711]                                       |
| PLS3    | plastin 3 [Source:HGNC Symbol;Acc:HGNC:9091]                                                      |
| SRSF7   | serine and arginine rich splicing factor 7 [Source:HGNC Symbol;Acc:HGNC:10789]                    |
| AACS    | acetoacetyl-CoA synthetase [Source:HGNC Symbol;Acc:HGNC:21298]                                    |
| CALU    | calumenin [Source:HGNC Symbol;Acc:HGNC:1458]                                                      |
| CKAP4   | cytoskeleton-associated protein 4 [Source:HGNC Symbol;Acc:HGNC:16991]                             |
| CTNND1  | catenin delta 1 [Source:HGNC Symbol;Acc:HGNC:2515]                                                |
| DRAM1   | DNA damage regulated autophagy modulator 1 [Source:HGNC Symbol;Acc:HGNC:25645]                    |
| FAM111A | family with sequence similarity 111 member A [Source:HGNC Symbol;Acc:HGNC:24725]                  |
| FANCA   | Fanconi anemia complementation group A [Source:HGNC Symbol;Acc:HGNC:3582]                         |
| FNDC3B  | fibronectin type III domain containing 3B [Source:HGNC Symbol;Acc:HGNC:24670]                     |
| HIVEP1  | human immunodeficiency virus type I enhancer binding protein 1 [Source:HGNC Symbol;Acc:HGNC:4920] |
| IFI6    | interferon alpha inducible protein 6 [Source:HGNC Symbol;Acc:HGNC:4054]                           |
| ILF3    | interleukin enhancer binding factor 3 [Source:HGNC Symbol;Acc:HGNC:6038]                          |
| LTBR    | lymphotoxin beta receptor [Source:HGNC Symbol;Acc:HGNC:6718]                                      |
| NDUFS4  | NADH:ubiquinone oxidoreductase subunit S4 [Source:HGNC Symbol;Acc:HGNC:7711]                      |
| PRIM2   | primase (DNA) subunit 2 [Source:HGNC Symbol;Acc:HGNC:9370]                                        |
| PSMC3   | proteasome 26S subunit, ATPase 3 [Source:HGNC Symbol;Acc:HGNC:9549]                               |
| RAD51C  | RAD51 paralog C [Source:HGNC Symbol;Acc:HGNC:9820]                                                |
| RANGAP1 | Ran GTPase activating protein 1 [Source:HGNC Symbol;Acc:HGNC:9854]                                |



|          |                                                                                          |
|----------|------------------------------------------------------------------------------------------|
| RHOU     | ras homolog family member U [Source:HGNC Symbol;Acc:HGNC:17794]                          |
| RPL3     | ribosomal protein L3 [Source:HGNC Symbol;Acc:HGNC:10332]                                 |
| SOS1     | SOS Ras/Rac guanine nucleotide exchange factor 1 [Source:HGNC Symbol;Acc:HGNC:11187]     |
| TPR      | translocated promoter region, nuclear basket protein [Source:HGNC Symbol;Acc:HGNC:12017] |
| UCK2     | uridine-cytidine kinase 2 [Source:HGNC Symbol;Acc:HGNC:12562]                            |
| WDHD1    | WD repeat and HMG-box DNA binding protein 1 [Source:HGNC Symbol;Acc:HGNC:23170]          |
| YBX3     | Y-box binding protein 3 [Source:HGNC Symbol;Acc:HGNC:2428]                               |
| ZBTB10   | zinc finger and BTB domain containing 10 [Source:HGNC Symbol;Acc:HGNC:30953]             |
| ACADVL   | acyl-CoA dehydrogenase, very long chain [Source:HGNC Symbol;Acc:HGNC:92]                 |
| FLNB     | filamin B [Source:HGNC Symbol;Acc:HGNC:3755]                                             |
| GABRB3   | gamma-aminobutyric acid type A receptor beta3 subunit [Source:HGNC Symbol;Acc:HGNC:4083] |
| ID2      | inhibitor of DNA binding 2, HLH protein [Source:HGNC Symbol;Acc:HGNC:5361]               |
| IL1RAP   | interleukin 1 receptor accessory protein [Source:HGNC Symbol;Acc:HGNC:5995]              |
| MT1F     | metallothionein 1F [Source:HGNC Symbol;Acc:HGNC:7398]                                    |
| RETSAT   | retinol saturase [Source:HGNC Symbol;Acc:HGNC:25991]                                     |
| SERTAD1  | SERTA domain containing 1 [Source:HGNC Symbol;Acc:HGNC:17932]                            |
| TACR1    | tachykinin receptor 1 [Source:HGNC Symbol;Acc:HGNC:11526]                                |
| TRADD    | TNFRSF1A associated via death domain [Source:HGNC Symbol;Acc:HGNC:12030]                 |
| ULK1     | unc-51 like autophagy activating kinase 1 [Source:HGNC Symbol;Acc:HGNC:12558]            |
| CCL8     | C-C motif chemokine ligand 8 [Source:HGNC Symbol;Acc:HGNC:10635]                         |
| ERBB4    | erb-b2 receptor tyrosine kinase 4 [Source:HGNC Symbol;Acc:HGNC:3432]                     |
| FAM13A   | family with sequence similarity 13 member A [Source:HGNC Symbol;Acc:HGNC:19367]          |
| GFRA2    | GDNF family receptor alpha 2 [Source:HGNC Symbol;Acc:HGNC:4244]                          |
| GLA      | galactosidase alpha [Source:HGNC Symbol;Acc:HGNC:4296]                                   |
| GYS2     | glycogen synthase 2 [Source:HGNC Symbol;Acc:HGNC:4707]                                   |
| MID1IP1  | MID1 interacting protein 1 [Source:HGNC Symbol;Acc:HGNC:20715]                           |
| PDHB     | pyruvate dehydrogenase (lipoamide) beta [Source:HGNC Symbol;Acc:HGNC:8808]               |
| PPP1CA   | protein phosphatase 1 catalytic subunit alpha [Source:HGNC Symbol;Acc:HGNC:9281]         |
| PSIP1    | PC4 and SFRS1 interacting protein 1 [Source:HGNC Symbol;Acc:HGNC:9527]                   |
| APOD     | apolipoprotein D [Source:HGNC Symbol;Acc:HGNC:612]                                       |
| CAMK2D   | calcium/calmodulin dependent protein kinase II delta [Source:HGNC Symbol;Acc:HGNC:1462]  |
| CCR7     | C-C motif chemokine receptor 7 [Source:HGNC Symbol;Acc:HGNC:1608]                        |
| FUS      | FUS RNA binding protein [Source:HGNC Symbol;Acc:HGNC:4010]                               |
| PAPSS2   | 3'-phosphoadenosine 5'-phosphosulfate synthase 2 [Source:HGNC Symbol;Acc:HGNC:8604]      |
| PPARGC1B | PPARG coactivator 1 beta [Source:HGNC Symbol;Acc:HGNC:30022]                             |
| ABCC8    | ATP binding cassette subfamily C member 8 [Source:HGNC Symbol;Acc:HGNC:59]               |
| ABCF1    | ATP binding cassette subfamily F member 1 [Source:HGNC Symbol;Acc:HGNC:70]               |

|          |                                                                                                                                    |
|----------|------------------------------------------------------------------------------------------------------------------------------------|
| AFF4     | AF4/FMR2 family member 4 [Source:HGNC Symbol;Acc:HGNC:17869]                                                                       |
| WISP2    | WNT1 inducible signaling pathway protein 2 [Source:HGNC Symbol;Acc:HGNC:12770]                                                     |
| CES3     | carboxylesterase 3 [Source:HGNC Symbol;Acc:HGNC:1865]                                                                              |
| CLIC1    | chloride intracellular channel 1 [Source:HGNC Symbol;Acc:HGNC:2062]                                                                |
| CSRP3    | cysteine and glycine rich protein 3 [Source:HGNC Symbol;Acc:HGNC:2472]                                                             |
| DIAPH3   | diaphanous related formin 3 [Source:HGNC Symbol;Acc:HGNC:15480]                                                                    |
| DKC1     | dyskerin pseudouridine synthase 1 [Source:HGNC Symbol;Acc:HGNC:2890]                                                               |
| DLAT     | dihydrolipoamide S-acetyltransferase [Source:HGNC Symbol;Acc:HGNC:2896]                                                            |
| DNAJB11  | DnaJ heat shock protein family (Hsp40) member B11 [Source:HGNC Symbol;Acc:HGNC:14889]                                              |
| ETFB     | electron transfer flavoprotein beta subunit [Source:HGNC Symbol;Acc:HGNC:3482]                                                     |
| ETHE1    | ETHE1, persulfide dioxygenase [Source:HGNC Symbol;Acc:HGNC:23287]                                                                  |
| FAM43A   | family with sequence similarity 43 member A [Source:HGNC Symbol;Acc:HGNC:26888]                                                    |
| FDX1     | ferredoxin 1 [Source:HGNC Symbol;Acc:HGNC:3638]                                                                                    |
| ITGA2B   | integrin subunit alpha 2b [Source:HGNC Symbol;Acc:HGNC:6138]                                                                       |
| LRP8     | LDL receptor related protein 8 [Source:HGNC Symbol;Acc:HGNC:6700]                                                                  |
| MR1      | major histocompatibility complex, class I-related [Source:HGNC Symbol;Acc:HGNC:4975]                                               |
| MTHFD1   | methylenetetrahydrofolate dehydrogenase, cyclohydrolase and formyltetrahydrofolate synthetase 1 [Source:HGNC Symbol;Acc:HGNC:7432] |
| NUDT7    | nudix hydrolase 7 [Source:HGNC Symbol;Acc:HGNC:8054]                                                                               |
| PERP     | PERP, TP53 apoptosis effector [Source:HGNC Symbol;Acc:HGNC:17637]                                                                  |
| PFKM     | phosphofructokinase, muscle [Source:HGNC Symbol;Acc:HGNC:8877]                                                                     |
| POLA2    | polymerase (DNA) alpha 2, accessory subunit [Source:HGNC Symbol;Acc:HGNC:30073]                                                    |
| PPP1CB   | protein phosphatase 1 catalytic subunit beta [Source:HGNC Symbol;Acc:HGNC:9282]                                                    |
| PRKCQ    | protein kinase C theta [Source:HGNC Symbol;Acc:HGNC:9410]                                                                          |
| RABGAP1L | RAB GTPase activating protein 1-like [Source:HGNC Symbol;Acc:HGNC:24663]                                                           |
| SPRY1    | sprouty RTK signaling antagonist 1 [Source:HGNC Symbol;Acc:HGNC:11269]                                                             |
| SUMO1    | small ubiquitin-like modifier 1 [Source:HGNC Symbol;Acc:HGNC:12502]                                                                |
| TIMELESS | timeless circadian clock [Source:HGNC Symbol;Acc:HGNC:11813]                                                                       |
| TNIP1    | TNFAIP3 interacting protein 1 [Source:HGNC Symbol;Acc:HGNC:16903]                                                                  |
| TP53I3   | tumor protein p53 inducible protein 3 [Source:HGNC Symbol;Acc:HGNC:19373]                                                          |
| YWHAH    | tyrosine 3-monooxygenase/tryptophan 5-monooxygenase activation protein eta [Source:HGNC Symbol;Acc:HGNC:12853]                     |
| ADGRE1   | adhesion G protein-coupled receptor E1 [Source:HGNC Symbol;Acc:HGNC:3336]                                                          |
| ALDH7A1  | aldehyde dehydrogenase 7 family member A1 [Source:HGNC Symbol;Acc:HGNC:877]                                                        |
| HNRNPH1  | heterogeneous nuclear ribonucleoprotein H1 (H) [Source:HGNC Symbol;Acc:HGNC:5041]                                                  |
| KMT2A    | lysine methyltransferase 2A [Source:HGNC Symbol;Acc:HGNC:7132]                                                                     |
| KRT10    | keratin 10 [Source:HGNC Symbol;Acc:HGNC:6413]                                                                                      |
| LY96     | lymphocyte antigen 96 [Source:HGNC Symbol;Acc:HGNC:17156]                                                                          |
| MT1E     | metallothionein 1E [Source:HGNC Symbol;Acc:HGNC:7397]                                                                              |

|         |                                                                                                                  |
|---------|------------------------------------------------------------------------------------------------------------------|
| PROC    | protein C, inactivator of coagulation factors Va and VIIIa [Source:HGNC Symbol;Acc:HGNC:9451]                    |
| RACK1   | receptor for activated C kinase 1 [Source:HGNC Symbol;Acc:HGNC:4399]                                             |
| RRAD    | RRAD, Ras related glycolysis inhibitor and calcium channel regulator [Source:HGNC Symbol;Acc:HGNC:10446]         |
| TCP1    | t-complex 1 [Source:HGNC Symbol;Acc:HGNC:11655]                                                                  |
| TNFSF9  | tumor necrosis factor superfamily member 9 [Source:HGNC Symbol;Acc:HGNC:11939]                                   |
| CCDC80  | coiled-coil domain containing 80 [Source:HGNC Symbol;Acc:HGNC:30649]                                             |
| CCNL1   | cyclin L1 [Source:HGNC Symbol;Acc:HGNC:20569]                                                                    |
| CDC7    | cell division cycle 7 [Source:HGNC Symbol;Acc:HGNC:1745]                                                         |
| CDK5    | cyclin dependent kinase 5 [Source:HGNC Symbol;Acc:HGNC:1774]                                                     |
| CENPU   | centromere protein U [Source:HGNC Symbol;Acc:HGNC:21348]                                                         |
| CRIP2   | cysteine rich protein 2 [Source:HGNC Symbol;Acc:HGNC:2361]                                                       |
| CRYZ    | crystallin zeta [Source:HGNC Symbol;Acc:HGNC:2419]                                                               |
| DBF4    | DBF4 zinc finger [Source:HGNC Symbol;Acc:HGNC:17364]                                                             |
| DHX9    | DEAH-box helicase 9 [Source:HGNC Symbol;Acc:HGNC:2750]                                                           |
| HNRNPAB | heterogeneous nuclear ribonucleoprotein A/B [Source:HGNC Symbol;Acc:HGNC:5034]                                   |
| IDE     | insulin degrading enzyme [Source:HGNC Symbol;Acc:HGNC:5381]                                                      |
| IMPDH2  | IMP (inosine 5'-monophosphate) dehydrogenase 2 [Source:HGNC Symbol;Acc:HGNC:6053]                                |
| IQGAP2  | IQ motif containing GTPase activating protein 2 [Source:HGNC Symbol;Acc:HGNC:6111]                               |
| ITIH3   | inter-alpha-trypsin inhibitor heavy chain 3 [Source:HGNC Symbol;Acc:HGNC:6168]                                   |
| KLF11   | Kruppel like factor 11 [Source:HGNC Symbol;Acc:HGNC:11811]                                                       |
| LIN7A   | lin-7 homolog A, crumbs cell polarity complex component [Source:HGNC Symbol;Acc:HGNC:17787]                      |
| LPIN2   | lipin 2 [Source:HGNC Symbol;Acc:HGNC:14450]                                                                      |
| METRNL  | meteorin, glial cell differentiation regulator-like [Source:HGNC Symbol;Acc:HGNC:27584]                          |
| MMD     | monocyte to macrophage differentiation associated [Source:HGNC Symbol;Acc:HGNC:7153]                             |
| NAT8    | N-acetyltransferase 8 (putative) [Source:HGNC Symbol;Acc:HGNC:18069]                                             |
| NID2    | nidogen 2 [Source:HGNC Symbol;Acc:HGNC:13389]                                                                    |
| PAPPA   | pappalysin 1 [Source:HGNC Symbol;Acc:HGNC:8602]                                                                  |
| PRKAR2B | protein kinase cAMP-dependent type II regulatory subunit beta [Source:HGNC Symbol;Acc:HGNC:9392]                 |
| SPC24   | SPC24, NDC80 kinetochore complex component [Source:HGNC Symbol;Acc:HGNC:26913]                                   |
| TNNC1   | troponin C1, slow skeletal and cardiac type [Source:HGNC Symbol;Acc:HGNC:11943]                                  |
| TRIO    | trio Rho guanine nucleotide exchange factor [Source:HGNC Symbol;Acc:HGNC:12303]                                  |
| YWHAQ   | tyrosine 3-monooxygenase/tryptophan 5-monooxygenase activation protein theta [Source:HGNC Symbol;Acc:HGNC:12854] |
| MYH9    | myosin, heavy chain 9, non-muscle [Source:HGNC Symbol;Acc:HGNC:7579]                                             |
| BLM     | Bloom syndrome RecQ like helicase [Source:HGNC Symbol;Acc:HGNC:1058]                                             |

|          |                                                                                                  |
|----------|--------------------------------------------------------------------------------------------------|
| CAMK2N1  | calcium/calmodulin dependent protein kinase II inhibitor 1 [Source:HGNC Symbol;Acc:HGNC:24190]   |
| CAPRIN1  | cell cycle associated protein 1 [Source:HGNC Symbol;Acc:HGNC:6743]                               |
| CBX5     | chromobox 5 [Source:HGNC Symbol;Acc:HGNC:1555]                                                   |
| CPEB2    | cytoplasmic polyadenylation element binding protein 2 [Source:HGNC Symbol;Acc:HGNC:21745]        |
| CRIP1    | cysteine rich protein 1 [Source:HGNC Symbol;Acc:HGNC:2360]                                       |
| DDR2     | discoidin domain receptor tyrosine kinase 2 [Source:HGNC Symbol;Acc:HGNC:2731]                   |
| EPB41L3  | erythrocyte membrane protein band 4.1 like 3 [Source:HGNC Symbol;Acc:HGNC:3380]                  |
| FIS1     | fission, mitochondrial 1 [Source:HGNC Symbol;Acc:HGNC:21689]                                     |
| GLS2     | glutaminase 2 [Source:HGNC Symbol;Acc:HGNC:29570]                                                |
| HNRNPA3  | heterogeneous nuclear ribonucleoprotein A3 [Source:HGNC Symbol;Acc:HGNC:24941]                   |
| HOPX     | HOP homeobox [Source:HGNC Symbol;Acc:HGNC:24961]                                                 |
| IDO1     | indoleamine 2,3-dioxygenase 1 [Source:HGNC Symbol;Acc:HGNC:6059]                                 |
| KIF18A   | kinesin family member 18A [Source:HGNC Symbol;Acc:HGNC:29441]                                    |
| KPNB1    | karyopherin subunit beta 1 [Source:HGNC Symbol;Acc:HGNC:6400]                                    |
| LXN      | latexin [Source:HGNC Symbol;Acc:HGNC:13347]                                                      |
| WHSC1    | Wolf-Hirschhorn syndrome candidate 1 [Source:HGNC Symbol;Acc:HGNC:12766]                         |
| OLFM1    | olfactomedin 1 [Source:HGNC Symbol;Acc:HGNC:17187]                                               |
| PHYH     | phytanoyl-CoA 2-hydroxylase [Source:HGNC Symbol;Acc:HGNC:8940]                                   |
| SERPINB5 | serpin family B member 5 [Source:HGNC Symbol;Acc:HGNC:8949]                                      |
| SIAH2    | siah E3 ubiquitin protein ligase 2 [Source:HGNC Symbol;Acc:HGNC:10858]                           |
| TBL1XR1  | transducin (beta)-like 1 X-linked receptor 1 [Source:HGNC Symbol;Acc:HGNC:29529]                 |
| TFF3     | trefoil factor 3 [Source:HGNC Symbol;Acc:HGNC:11757]                                             |
| TP73     | tumor protein p73 [Source:HGNC Symbol;Acc:HGNC:12003]                                            |
| TRAP1    | TNF receptor associated protein 1 [Source:HGNC Symbol;Acc:HGNC:16264]                            |
| TSHR     | thyroid stimulating hormone receptor [Source:HGNC Symbol;Acc:HGNC:12373]                         |
| ARHGDIB  | Rho GDP dissociation inhibitor beta [Source:HGNC Symbol;Acc:HGNC:679]                            |
| BCAT1    | branched chain amino acid transaminase 1 [Source:HGNC Symbol;Acc:HGNC:976]                       |
| IL13RA1  | interleukin 13 receptor subunit alpha 1 [Source:HGNC Symbol;Acc:HGNC:5974]                       |
| MXD1     | MAX dimerization protein 1 [Source:HGNC Symbol;Acc:HGNC:6761]                                    |
| SPINK1   | serine peptidase inhibitor, Kazal type 1 [Source:HGNC Symbol;Acc:HGNC:11244]                     |
| ZFAND2A  | zinc finger AN1-type containing 2A [Source:HGNC Symbol;Acc:HGNC:28073]                           |
| ABCC9    | ATP binding cassette subfamily C member 9 [Source:HGNC Symbol;Acc:HGNC:60]                       |
| ALDH18A1 | aldehyde dehydrogenase 18 family member A1 [Source:HGNC Symbol;Acc:HGNC:9722]                    |
| CACNA2D1 | calcium voltage-gated channel auxiliary subunit alpha2delta 1 [Source:HGNC Symbol;Acc:HGNC:1399] |
| CARHSP1  | calcium regulated heat stable protein 1 [Source:HGNC Symbol;Acc:HGNC:17150]                      |
| CBL      | Cbl proto-oncogene [Source:HGNC Symbol;Acc:HGNC:1541]                                            |
| CDK5R1   | cyclin dependent kinase 5 regulatory subunit 1 [Source:HGNC Symbol;Acc:HGNC:1775]                |
| DACT1    | dishevelled binding antagonist of beta catenin 1 [Source:HGNC Symbol;Acc:HGNC:17748]             |

|          |                                                                                                                     |
|----------|---------------------------------------------------------------------------------------------------------------------|
| DFFA     | DNA fragmentation factor subunit alpha [Source:HGNC Symbol;Acc:HGNC:2772]                                           |
| DHRS7    | dehydrogenase/reductase 7 [Source:HGNC Symbol;Acc:HGNC:21524]                                                       |
| ENPEP    | glutamyl aminopeptidase [Source:HGNC Symbol;Acc:HGNC:3355]                                                          |
| EPOR     | erythropoietin receptor [Source:HGNC Symbol;Acc:HGNC:3416]                                                          |
| ETV4     | ETS variant 4 [Source:HGNC Symbol;Acc:HGNC:3493]                                                                    |
| FKBP11   | FK506 binding protein 11 [Source:HGNC Symbol;Acc:HGNC:18624]                                                        |
| HNRNPDL  | heterogeneous nuclear ribonucleoprotein D like [Source:HGNC Symbol;Acc:HGNC:5037]                                   |
| ITGAL    | integrin subunit alpha L [Source:HGNC Symbol;Acc:HGNC:6148]                                                         |
| IVNS1ABP | influenza virus NS1A binding protein [Source:HGNC Symbol;Acc:HGNC:16951]                                            |
| MKNK2    | MAP kinase interacting serine/threonine kinase 2 [Source:HGNC Symbol;Acc:HGNC:7111]                                 |
| NT5DC2   | 5'-nucleotidase domain containing 2 [Source:HGNC Symbol;Acc:HGNC:25717]                                             |
| ORC1     | origin recognition complex subunit 1 [Source:HGNC Symbol;Acc:HGNC:8487]                                             |
| PSMD12   | proteasome 26S subunit, non-ATPase 12 [Source:HGNC Symbol;Acc:HGNC:9557]                                            |
| RAD23B   | RAD23 homolog B, nucleotide excision repair protein [Source:HGNC Symbol;Acc:HGNC:9813]                              |
| SLC15A1  | solute carrier family 15 member 1 [Source:HGNC Symbol;Acc:HGNC:10920]                                               |
| STAT4    | signal transducer and activator of transcription 4 [Source:HGNC Symbol;Acc:HGNC:11365]                              |
| STOM     | stomatin [Source:HGNC Symbol;Acc:HGNC:3383]                                                                         |
| TGFR3    | transforming growth factor beta receptor 3 [Source:HGNC Symbol;Acc:HGNC:11774]                                      |
| TYROBP   | TYRO protein tyrosine kinase binding protein [Source:HGNC Symbol;Acc:HGNC:12449]                                    |
| UQCRC2   | ubiquinol-cytochrome c reductase core protein II [Source:HGNC Symbol;Acc:HGNC:12586]                                |
| YWHAG    | tyrosine 3-monooxygenase/tryptophan 5-monooxygenase activation protein gamma [Source:HGNC Symbol;Acc:HGNC:12852]    |
| BLVRB    | biliverdin reductase B [Source:HGNC Symbol;Acc:HGNC:1063]                                                           |
| DCXR     | dicarbonyl/L-xylulose reductase [Source:HGNC Symbol;Acc:HGNC:18985]                                                 |
| HSD17B3  | hydroxysteroid 17-beta dehydrogenase 3 [Source:HGNC Symbol;Acc:HGNC:5212]                                           |
| ACSM3    | acyl-CoA synthetase medium-chain family member 3 [Source:HGNC Symbol;Acc:HGNC:10522]                                |
| AKAP9    | A-kinase anchoring protein 9 [Source:HGNC Symbol;Acc:HGNC:379]                                                      |
| ARPC1B   | actin related protein 2/3 complex subunit 1B [Source:HGNC Symbol;Acc:HGNC:704]                                      |
| BCL10    | B-cell CLL/lymphoma 10 [Source:HGNC Symbol;Acc:HGNC:989]                                                            |
| BMPT2    | bone morphogenetic protein receptor type 2 [Source:HGNC Symbol;Acc:HGNC:1078]                                       |
| CAD      | carbamoyl-phosphate synthetase 2, aspartate transcarbamylase, and dihydroorotase [Source:HGNC Symbol;Acc:HGNC:1424] |
| CCKBR    | cholecystokinin B receptor [Source:HGNC Symbol;Acc:HGNC:1571]                                                       |
| CORO1A   | coronin 1A [Source:HGNC Symbol;Acc:HGNC:2252]                                                                       |
| DCK      | deoxycytidine kinase [Source:HGNC Symbol;Acc:HGNC:2704]                                                             |
| DEK      | DEK proto-oncogene [Source:HGNC Symbol;Acc:HGNC:2768]                                                               |
| DYNLL1   | dynein light chain LC8-type 1 [Source:HGNC Symbol;Acc:HGNC:15476]                                                   |

|         |                                                                                         |
|---------|-----------------------------------------------------------------------------------------|
| E2F3    | E2F transcription factor 3 [Source:HGNC Symbol;Acc:HGNC:3115]                           |
| EIF4A2  | eukaryotic translation initiation factor 4A2 [Source:HGNC Symbol;Acc:HGNC:3284]         |
| FCER1G  | Fc fragment of IgE receptor Ig [Source:HGNC Symbol;Acc:HGNC:3611]                       |
| GNB1    | G protein subunit beta 1 [Source:HGNC Symbol;Acc:HGNC:4396]                             |
| HNF1A   | HNF1 homeobox A [Source:HGNC Symbol;Acc:HGNC:11621]                                     |
| INCENP  | inner centromere protein [Source:HGNC Symbol;Acc:HGNC:6058]                             |
| ITGA1   | integrin subunit alpha 1 [Source:HGNC Symbol;Acc:HGNC:6134]                             |
| LIMA1   | LIM domain and actin binding 1 [Source:HGNC Symbol;Acc:HGNC:24636]                      |
| NBN     | nibrin [Source:HGNC Symbol;Acc:HGNC:7652]                                               |
| NPAS2   | neuronal PAS domain protein 2 [Source:HGNC Symbol;Acc:HGNC:7895]                        |
| OXCT1   | 3-oxoacid CoA-transferase 1 [Source:HGNC Symbol;Acc:HGNC:8527]                          |
| PCSK5   | proprotein convertase subtilisin/kexin type 5 [Source:HGNC Symbol;Acc:HGNC:8747]        |
| PDE2A   | phosphodiesterase 2A [Source:HGNC Symbol;Acc:HGNC:8777]                                 |
| PLEC    | plectin [Source:HGNC Symbol;Acc:HGNC:9069]                                              |
| PNRC1   | proline rich nuclear receptor coactivator 1 [Source:HGNC Symbol;Acc:HGNC:17278]         |
| PPP1R10 | protein phosphatase 1 regulatory subunit 10 [Source:HGNC Symbol;Acc:HGNC:9284]          |
| RPA1    | replication protein A1 [Source:HGNC Symbol;Acc:HGNC:10289]                              |
| ST3GAL1 | ST3 beta-galactoside alpha-2,3-sialyltransferase 1 [Source:HGNC Symbol;Acc:HGNC:10862]  |
| STK17B  | serine/threonine kinase 17b [Source:HGNC Symbol;Acc:HGNC:11396]                         |
| TFDP1   | transcription factor Dp-1 [Source:HGNC Symbol;Acc:HGNC:11749]                           |
| UCP3    | uncoupling protein 3 [Source:HGNC Symbol;Acc:HGNC:12519]                                |
| VAV3    | vav guanine nucleotide exchange factor 3 [Source:HGNC Symbol;Acc:HGNC:12659]            |
| ALCAM   | activated leukocyte cell adhesion molecule [Source:HGNC Symbol;Acc:HGNC:400]            |
| DBI     | diazepam binding inhibitor, acyl-CoA binding protein [Source:HGNC Symbol;Acc:HGNC:2690] |
| ETS2    | ETS proto-oncogene 2, transcription factor [Source:HGNC Symbol;Acc:HGNC:3489]           |
| GK      | glycerol kinase [Source:HGNC Symbol;Acc:HGNC:4289]                                      |
| INSIG2  | insulin induced gene 2 [Source:HGNC Symbol;Acc:HGNC:20452]                              |
| AHSG    | alpha 2-HS glycoprotein [Source:HGNC Symbol;Acc:HGNC:349]                               |
| APLN    | apelin [Source:HGNC Symbol;Acc:HGNC:16665]                                              |
| ASPH    | aspartate beta-hydroxylase [Source:HGNC Symbol;Acc:HGNC:757]                            |
| CASP10  | caspase 10 [Source:HGNC Symbol;Acc:HGNC:1500]                                           |
| CCT2    | chaperonin containing TCP1 subunit 2 [Source:HGNC Symbol;Acc:HGNC:1615]                 |
| CGB3    | chorionic gonadotropin beta subunit 3 [Source:HGNC Symbol;Acc:HGNC:1886]                |
| DEPTOR  | DEP domain containing MTOR-interacting protein [Source:HGNC Symbol;Acc:HGNC:22953]      |
| DUSP8   | dual specificity phosphatase 8 [Source:HGNC Symbol;Acc:HGNC:3074]                       |
| FMR1    | fragile X mental retardation 1 [Source:HGNC Symbol;Acc:HGNC:3775]                       |
| GCHFR   | GTP cyclohydrolase I feedback regulator [Source:HGNC Symbol;Acc:HGNC:4194]              |
| GZMB    | granzyme B [Source:HGNC Symbol;Acc:HGNC:4709]                                           |
| HAO2    | hydroxyacid oxidase 2 [Source:HGNC Symbol;Acc:HGNC:4810]                                |

|          |                                                                                                                 |
|----------|-----------------------------------------------------------------------------------------------------------------|
| KCNN4    | potassium calcium-activated channel subfamily N member 4 [Source:HGNC Symbol;Acc:HGNC:6293]                     |
| CASC5    | cancer susceptibility candidate 5 [Source:HGNC Symbol;Acc:HGNC:24054]                                           |
| LRRFIP1  | leucine rich repeat (in FLII) interacting protein 1 [Source:HGNC Symbol;Acc:HGNC:6702]                          |
| ORC6     | origin recognition complex subunit 6 [Source:HGNC Symbol;Acc:HGNC:17151]                                        |
| PRMT1    | protein arginine methyltransferase 1 [Source:HGNC Symbol;Acc:HGNC:5187]                                         |
| RARRES1  | retinoic acid receptor responder 1 [Source:HGNC Symbol;Acc:HGNC:9867]                                           |
| RECK     | reversion inducing cysteine rich protein with kazal motifs [Source:HGNC Symbol;Acc:HGNC:11345]                  |
| RPS19    | ribosomal protein S19 [Source:HGNC Symbol;Acc:HGNC:10402]                                                       |
| SLC25A10 | solute carrier family 25 member 10 [Source:HGNC Symbol;Acc:HGNC:10980]                                          |
| SMC1A    | structural maintenance of chromosomes 1A [Source:HGNC Symbol;Acc:HGNC:11111]                                    |
| SRSF5    | serine and arginine rich splicing factor 5 [Source:HGNC Symbol;Acc:HGNC:10787]                                  |
| TOP2B    | topoisomerase (DNA) II beta [Source:HGNC Symbol;Acc:HGNC:11990]                                                 |
| TRAF2    | TNF receptor associated factor 2 [Source:HGNC Symbol;Acc:HGNC:12032]                                            |
| WSB1     | WD repeat and SOCS box containing 1 [Source:HGNC Symbol;Acc:HGNC:19221]                                         |
| YWHAB    | tyrosine 3-monooxygenase/tryptophan 5-monooxygenase activation protein beta [Source:HGNC Symbol;Acc:HGNC:12849] |
| BNIP3L   | BCL2/adenovirus E1B 19kDa interacting protein 3-like [Source:HGNC Symbol;Acc:HGNC:1085]                         |
| DRD3     | dopamine receptor D3 [Source:HGNC Symbol;Acc:HGNC:3024]                                                         |
| DUSP4    | dual specificity phosphatase 4 [Source:HGNC Symbol;Acc:HGNC:3070]                                               |
| FLNA     | filamin A [Source:HGNC Symbol;Acc:HGNC:3754]                                                                    |
| GNRH1    | gonadotropin releasing hormone 1 [Source:HGNC Symbol;Acc:HGNC:4419]                                             |
| PRKCZ    | protein kinase C zeta [Source:HGNC Symbol;Acc:HGNC:9412]                                                        |
| SIK1     | salt inducible kinase 1 [Source:HGNC Symbol;Acc:HGNC:11142]                                                     |
| TAT      | tyrosine aminotransferase [Source:HGNC Symbol;Acc:HGNC:11573]                                                   |
| BARD1    | BRCA1 associated RING domain 1 [Source:HGNC Symbol;Acc:HGNC:952]                                                |
| CDCA7    | cell division cycle associated 7 [Source:HGNC Symbol;Acc:HGNC:14628]                                            |
| CRABP2   | cellular retinoic acid binding protein 2 [Source:HGNC Symbol;Acc:HGNC:2339]                                     |
| EPS8     | epidermal growth factor receptor pathway substrate 8 [Source:HGNC Symbol;Acc:HGNC:3420]                         |
| FAH      | fumarylacetoacetate hydrolase (fumarylacetoacetase) [Source:HGNC Symbol;Acc:HGNC:3579]                          |
| FDXR     | ferredoxin reductase [Source:HGNC Symbol;Acc:HGNC:3642]                                                         |
| GINS2    | GINS complex subunit 2 [Source:HGNC Symbol;Acc:HGNC:24575]                                                      |
| IL3      | interleukin 3 [Source:HGNC Symbol;Acc:HGNC:6011]                                                                |
| ISYNA1   | inositol-3-phosphate synthase 1 [Source:HGNC Symbol;Acc:HGNC:29821]                                             |
| LAMC1    | laminin subunit gamma 1 [Source:HGNC Symbol;Acc:HGNC:6492]                                                      |
| NNMT     | nicotinamide N-methyltransferase [Source:HGNC Symbol;Acc:HGNC:7861]                                             |
| NRAS     | neuroblastoma RAS viral oncogene homolog [Source:HGNC Symbol;Acc:HGNC:7989]                                     |

|          |                                                                                                |
|----------|------------------------------------------------------------------------------------------------|
| PGRMC1   | progesterone receptor membrane component 1 [Source:HGNC Symbol;Acc:HGNC:16090]                 |
| PSMB10   | proteasome subunit beta 10 [Source:HGNC Symbol;Acc:HGNC:9538]                                  |
| PSMB5    | proteasome subunit beta 5 [Source:HGNC Symbol;Acc:HGNC:9542]                                   |
| PTMA     | prothymosin, alpha [Source:HGNC Symbol;Acc:HGNC:9623]                                          |
| RASSF4   | Ras association domain family member 4 [Source:HGNC Symbol;Acc:HGNC:20793]                     |
| RPL6     | ribosomal protein L6 [Source:HGNC Symbol;Acc:HGNC:10362]                                       |
| RPS6KA1  | ribosomal protein S6 kinase A1 [Source:HGNC Symbol;Acc:HGNC:10430]                             |
| SHCBP1   | SHC binding and spindle associated 1 [Source:HGNC Symbol;Acc:HGNC:29547]                       |
| SLC25A37 | solute carrier family 25 member 37 [Source:HGNC Symbol;Acc:HGNC:29786]                         |
| SMC2     | structural maintenance of chromosomes 2 [Source:HGNC Symbol;Acc:HGNC:14011]                    |
| SMO      | smoothened, frizzled class receptor [Source:HGNC Symbol;Acc:HGNC:11119]                        |
| SYNE1    | spectrin repeat containing nuclear envelope protein 1 [Source:HGNC Symbol;Acc:HGNC:17089]      |
| UQCRC1   | ubiquinol-cytochrome c reductase core protein I [Source:HGNC Symbol;Acc:HGNC:12585]            |
| HSPA6    | heat shock protein family A (Hsp70) member 6 [Source:HGNC Symbol;Acc:HGNC:5239]                |
| INHBB    | inhibin beta B subunit [Source:HGNC Symbol;Acc:HGNC:6067]                                      |
| OPRK1    | opioid receptor kappa 1 [Source:HGNC Symbol;Acc:HGNC:8154]                                     |
| PTHLH    | parathyroid hormone-like hormone [Source:HGNC Symbol;Acc:HGNC:9607]                            |
| RGS16    | regulator of G-protein signaling 16 [Source:HGNC Symbol;Acc:HGNC:9997]                         |
| SLC25A20 | solute carrier family 25 member 20 [Source:HGNC Symbol;Acc:HGNC:1421]                          |
| ADD3     | adducin 3 [Source:HGNC Symbol;Acc:HGNC:245]                                                    |
| CEBPG    | CCAAT/enhancer binding protein gamma [Source:HGNC Symbol;Acc:HGNC:1837]                        |
| DDX21    | DEAD-box helicase 21 [Source:HGNC Symbol;Acc:HGNC:2744]                                        |
| DLG1     | discs large MAGUK scaffold protein 1 [Source:HGNC Symbol;Acc:HGNC:2900]                        |
| EIF1     | eukaryotic translation initiation factor 1 [Source:HGNC Symbol;Acc:HGNC:3249]                  |
| EPHA4    | EPH receptor A4 [Source:HGNC Symbol;Acc:HGNC:3388]                                             |
| HDAC5    | histone deacetylase 5 [Source:HGNC Symbol;Acc:HGNC:14068]                                      |
| IRF9     | interferon regulatory factor 9 [Source:HGNC Symbol;Acc:HGNC:6131]                              |
| MELK     | maternal embryonic leucine zipper kinase [Source:HGNC Symbol;Acc:HGNC:16870]                   |
| MFN1     | mitofusin 1 [Source:HGNC Symbol;Acc:HGNC:18262]                                                |
| MTUS1    | microtubule associated tumor suppressor 1 [Source:HGNC Symbol;Acc:HGNC:29789]                  |
| NASP     | nuclear autoantigenic sperm protein [Source:HGNC Symbol;Acc:HGNC:7644]                         |
| POLD1    | polymerase (DNA) delta 1, catalytic subunit [Source:HGNC Symbol;Acc:HGNC:9175]                 |
| SLCO2A1  | solute carrier organic anion transporter family member 2A1 [Source:HGNC Symbol;Acc:HGNC:10955] |
| SRSF1    | serine and arginine rich splicing factor 1 [Source:HGNC Symbol;Acc:HGNC:10780]                 |
| TDO2     | tryptophan 2,3-dioxygenase [Source:HGNC Symbol;Acc:HGNC:11708]                                 |
| TRAF1    | TNF receptor associated factor 1 [Source:HGNC Symbol;Acc:HGNC:12031]                           |
| AKAP12   | A-kinase anchoring protein 12 [Source:HGNC Symbol;Acc:HGNC:370]                                |



|          |                                                                                                                                   |
|----------|-----------------------------------------------------------------------------------------------------------------------------------|
| SLC29A1  | solute carrier family 29 member 1 (Augustine blood group) [Source:HGNC Symbol;Acc:HGNC:11003]                                     |
| ATAD2    | ATPase family, AAA domain containing 2 [Source:HGNC Symbol;Acc:HGNC:30123]                                                        |
| CTTN     | cortactin [Source:HGNC Symbol;Acc:HGNC:3338]                                                                                      |
| DDB2     | damage specific DNA binding protein 2 [Source:HGNC Symbol;Acc:HGNC:2718]                                                          |
| ESPL1    | extra spindle pole bodies like 1, separase [Source:HGNC Symbol;Acc:HGNC:16856]                                                    |
| FOXP3    | forkhead box P3 [Source:HGNC Symbol;Acc:HGNC:6106]                                                                                |
| FSTL1    | folliculin like 1 [Source:HGNC Symbol;Acc:HGNC:3972]                                                                              |
| LYZ      | lysozyme [Source:HGNC Symbol;Acc:HGNC:6740]                                                                                       |
| NEDD4    | neural precursor cell expressed, developmentally down-regulated 4, E3 ubiquitin protein ligase [Source:HGNC Symbol;Acc:HGNC:7727] |
| PDZK1    | PDZ domain containing 1 [Source:HGNC Symbol;Acc:HGNC:8821]                                                                        |
| PIK3R3   | phosphoinositide-3-kinase regulatory subunit 3 [Source:HGNC Symbol;Acc:HGNC:8981]                                                 |
| RBM3     | RNA binding motif (RNP1, RRM) protein 3 [Source:HGNC Symbol;Acc:HGNC:9900]                                                        |
| RFC3     | replication factor C subunit 3 [Source:HGNC Symbol;Acc:HGNC:9971]                                                                 |
| TNS1     | tensin 1 [Source:HGNC Symbol;Acc:HGNC:11973]                                                                                      |
| TP53INP1 | tumor protein p53 inducible nuclear protein 1 [Source:HGNC Symbol;Acc:HGNC:18022]                                                 |
| ABAT     | 4-aminobutyrate aminotransferase [Source:HGNC Symbol;Acc:HGNC:23]                                                                 |
| F5       | coagulation factor V [Source:HGNC Symbol;Acc:HGNC:3542]                                                                           |
| GAL      | galanin and GMAP prepropeptide [Source:HGNC Symbol;Acc:HGNC:4114]                                                                 |
| SCNN1A   | sodium channel epithelial 1 alpha subunit [Source:HGNC Symbol;Acc:HGNC:10599]                                                     |
| SLC47A1  | solute carrier family 47 member 1 [Source:HGNC Symbol;Acc:HGNC:25588]                                                             |
| TUBB2A   | tubulin beta 2A class IIa [Source:HGNC Symbol;Acc:HGNC:12412]                                                                     |
| UGDH     | UDP-glucose 6-dehydrogenase [Source:HGNC Symbol;Acc:HGNC:12525]                                                                   |
| ACADS    | acyl-CoA dehydrogenase, C-2 to C-3 short chain [Source:HGNC Symbol;Acc:HGNC:90]                                                   |
| CMBL     | carboxymethylenebutenolidase homolog (Pseudomonas) [Source:HGNC Symbol;Acc:HGNC:25090]                                            |
| EIF4A1   | eukaryotic translation initiation factor 4A1 [Source:HGNC Symbol;Acc:HGNC:3282]                                                   |
| EIF4G1   | eukaryotic translation initiation factor 4 gamma 1 [Source:HGNC Symbol;Acc:HGNC:3296]                                             |
| FOXA1    | forkhead box A1 [Source:HGNC Symbol;Acc:HGNC:5021]                                                                                |
| HNRNPD   | heterogeneous nuclear ribonucleoprotein D [Source:HGNC Symbol;Acc:HGNC:5036]                                                      |
| KLF15    | Kruppel like factor 15 [Source:HGNC Symbol;Acc:HGNC:14536]                                                                        |
| MTHFD1L  | methylenetetrahydrofolate dehydrogenase (NADP+ dependent) 1-like [Source:HGNC Symbol;Acc:HGNC:21055]                              |
| NOLC1    | nucleolar and coiled-body phosphoprotein 1 [Source:HGNC Symbol;Acc:HGNC:15608]                                                    |
| NPHS1    | NPHS1 nephrin [Source:HGNC Symbol;Acc:HGNC:7908]                                                                                  |
| POLA1    | polymerase (DNA) alpha 1, catalytic subunit [Source:HGNC Symbol;Acc:HGNC:9173]                                                    |
| PPP1R3B  | protein phosphatase 1 regulatory subunit 3B [Source:HGNC Symbol;Acc:HGNC:14942]                                                   |
| PRKACB   | protein kinase cAMP-activated catalytic subunit beta [Source:HGNC Symbol;Acc:HGNC:9381]                                           |
| RFC4     | replication factor C subunit 4 [Source:HGNC Symbol;Acc:HGNC:9972]                                                                 |
| RYR2     | ryanodine receptor 2 [Source:HGNC Symbol;Acc:HGNC:10484]                                                                          |

|          |                                                                                                                |
|----------|----------------------------------------------------------------------------------------------------------------|
| SLC4A1   | solute carrier family 4 member 1 (Diego blood group) [Source:HGNC Symbol;Acc:HGNC:11027]                       |
| SLC4A4   | solute carrier family 4 member 4 [Source:HGNC Symbol;Acc:HGNC:11030]                                           |
| SOX17    | SRY-box 17 [Source:HGNC Symbol;Acc:HGNC:18122]                                                                 |
| SPAG5    | sperm associated antigen 5 [Source:HGNC Symbol;Acc:HGNC:13452]                                                 |
| SYK      | spleen tyrosine kinase [Source:HGNC Symbol;Acc:HGNC:11491]                                                     |
| TXNL1    | thioredoxin like 1 [Source:HGNC Symbol;Acc:HGNC:12436]                                                         |
| PRC1     | protein regulator of cytokinesis 1 [Source:HGNC Symbol;Acc:HGNC:9341]                                          |
| RND3     | Rho family GTPase 3 [Source:HGNC Symbol;Acc:HGNC:671]                                                          |
| TRIB1    | tribbles pseudokinase 1 [Source:HGNC Symbol;Acc:HGNC:16891]                                                    |
| ADAM17   | ADAM metallopeptidase domain 17 [Source:HGNC Symbol;Acc:HGNC:195]                                              |
| ASF1B    | anti-silencing function 1B histone chaperone [Source:HGNC Symbol;Acc:HGNC:20996]                               |
| CD69     | CD69 molecule [Source:HGNC Symbol;Acc:HGNC:1694]                                                               |
| CRISPLD2 | cysteine rich secretory protein LCCL domain containing 2 [Source:HGNC Symbol;Acc:HGNC:25248]                   |
| CYB5R3   | cytochrome b5 reductase 3 [Source:HGNC Symbol;Acc:HGNC:2873]                                                   |
| GLB1     | galactosidase beta 1 [Source:HGNC Symbol;Acc:HGNC:4298]                                                        |
| GLI1     | GLI family zinc finger 1 [Source:HGNC Symbol;Acc:HGNC:4317]                                                    |
| HNRNPK   | heterogeneous nuclear ribonucleoprotein K [Source:HGNC Symbol;Acc:HGNC:5044]                                   |
| MECP2    | methyl-CpG binding protein 2 [Source:HGNC Symbol;Acc:HGNC:6990]                                                |
| NCAPH    | non-SMC condensin I complex subunit H [Source:HGNC Symbol;Acc:HGNC:1112]                                       |
| PLK4     | polo like kinase 4 [Source:HGNC Symbol;Acc:HGNC:11397]                                                         |
| PPP2CA   | protein phosphatase 2 catalytic subunit alpha [Source:HGNC Symbol;Acc:HGNC:9299]                               |
| RGS5     | regulator of G-protein signaling 5 [Source:HGNC Symbol;Acc:HGNC:10001]                                         |
| SHMT1    | serine hydroxymethyltransferase 1 [Source:HGNC Symbol;Acc:HGNC:10850]                                          |
| SLC9A1   | solute carrier family 9 member A1 [Source:HGNC Symbol;Acc:HGNC:11071]                                          |
| TALDO1   | transaldolase 1 [Source:HGNC Symbol;Acc:HGNC:11559]                                                            |
| TPO      | thyroid peroxidase [Source:HGNC Symbol;Acc:HGNC:12015]                                                         |
| HSD17B1  | hydroxysteroid 17-beta dehydrogenase 1 [Source:HGNC Symbol;Acc:HGNC:5210]                                      |
| OSGIN1   | oxidative stress induced growth inhibitor 1 [Source:HGNC Symbol;Acc:HGNC:30093]                                |
| S100A11  | S100 calcium binding protein A11 [Source:HGNC Symbol;Acc:HGNC:10488]                                           |
| SLC30A1  | solute carrier family 30 member 1 [Source:HGNC Symbol;Acc:HGNC:11012]                                          |
| SLC38A2  | solute carrier family 38 member 2 [Source:HGNC Symbol;Acc:HGNC:13448]                                          |
| BCAR3    | breast cancer anti-estrogen resistance 3 [Source:HGNC Symbol;Acc:HGNC:973]                                     |
| COTL1    | coactosin like F-actin binding protein 1 [Source:HGNC Symbol;Acc:HGNC:18304]                                   |
| ERO1A    | endoplasmic reticulum oxidoreductase alpha [Source:HGNC Symbol;Acc:HGNC:13280]                                 |
| FOXA2    | forkhead box A2 [Source:HGNC Symbol;Acc:HGNC:5022]                                                             |
| G6PC     | glucose-6-phosphatase catalytic subunit [Source:HGNC Symbol;Acc:HGNC:4056]                                     |
| GFRA1    | GDNF family receptor alpha 1 [Source:HGNC Symbol;Acc:HGNC:4243]                                                |
| GLO1     | glyoxalase I [Source:HGNC Symbol;Acc:HGNC:4323]                                                                |
| IKBKG    | inhibitor of kappa light polypeptide gene enhancer in B-cells, kinase gamma [Source:HGNC Symbol;Acc:HGNC:5961] |

|          |                                                                                                                                       |
|----------|---------------------------------------------------------------------------------------------------------------------------------------|
| MYO1B    | myosin IB [Source:HGNC Symbol;Acc:HGNC:7596]                                                                                          |
| OPA1     | OPA1, mitochondrial dynamin like GTPase [Source:HGNC Symbol;Acc:HGNC:8140]                                                            |
| PMEPA1   | prostate transmembrane protein, androgen induced 1 [Source:HGNC Symbol;Acc:HGNC:14107]                                                |
| PPP1R12A | protein phosphatase 1 regulatory subunit 12A [Source:HGNC Symbol;Acc:HGNC:7618]                                                       |
| PSMA5    | proteasome subunit alpha 5 [Source:HGNC Symbol;Acc:HGNC:9534]                                                                         |
| RRM2B    | ribonucleotide reductase regulatory TP53 inducible subunit M2B [Source:HGNC Symbol;Acc:HGNC:17296]                                    |
| SMAD1    | SMAD family member 1 [Source:HGNC Symbol;Acc:HGNC:6767]                                                                               |
| SMARCA4  | SWI/SNF related, matrix associated, actin dependent regulator of chromatin, subfamily a, member 4 [Source:HGNC Symbol;Acc:HGNC:11100] |
| TWIST1   | twist family bHLH transcription factor 1 [Source:HGNC Symbol;Acc:HGNC:12428]                                                          |
| YWHAE    | tyrosine 3-monooxygenase/tryptophan 5-monooxygenase activation protein epsilon [Source:HGNC Symbol;Acc:HGNC:12851]                    |
| CALM1    | calmodulin 1 (phosphorylase kinase, delta) [Source:HGNC Symbol;Acc:HGNC:1442]                                                         |
| IFIT1    | interferon induced protein with tetratricopeptide repeats 1 [Source:HGNC Symbol;Acc:HGNC:5407]                                        |
| IL11     | interleukin 11 [Source:HGNC Symbol;Acc:HGNC:5966]                                                                                     |
| CGA      | glycoprotein hormones, alpha polypeptide [Source:HGNC Symbol;Acc:HGNC:1885]                                                           |
| DCLK1    | doublecortin like kinase 1 [Source:HGNC Symbol;Acc:HGNC:2700]                                                                         |
| IER2     | immediate early response 2 [Source:HGNC Symbol;Acc:HGNC:28871]                                                                        |
| ITPR3    | inositol 1,4,5-trisphosphate receptor type 3 [Source:HGNC Symbol;Acc:HGNC:6182]                                                       |
| MYBL2    | MYB proto-oncogene like 2 [Source:HGNC Symbol;Acc:HGNC:7548]                                                                          |
| NR2F2    | nuclear receptor subfamily 2 group F member 2 [Source:HGNC Symbol;Acc:HGNC:7976]                                                      |
| PF4      | platelet factor 4 [Source:HGNC Symbol;Acc:HGNC:8861]                                                                                  |
| POLE2    | polymerase (DNA) epsilon 2, accessory subunit [Source:HGNC Symbol;Acc:HGNC:9178]                                                      |
| PRIM1    | primase (DNA) subunit 1 [Source:HGNC Symbol;Acc:HGNC:9369]                                                                            |
| PRKAA2   | protein kinase AMP-activated catalytic subunit alpha 2 [Source:HGNC Symbol;Acc:HGNC:9377]                                             |
| SLC7A2   | solute carrier family 7 member 2 [Source:HGNC Symbol;Acc:HGNC:11060]                                                                  |
| TFAP2A   | transcription factor AP-2 alpha [Source:HGNC Symbol;Acc:HGNC:11742]                                                                   |
| TMPRSS2  | transmembrane protease, serine 2 [Source:HGNC Symbol;Acc:HGNC:11876]                                                                  |
| TRH      | thyrotropin releasing hormone [Source:HGNC Symbol;Acc:HGNC:12298]                                                                     |
| UBE2T    | ubiquitin conjugating enzyme E2 T [Source:HGNC Symbol;Acc:HGNC:25009]                                                                 |
| HRH1     | histamine receptor H1 [Source:HGNC Symbol;Acc:HGNC:5182]                                                                              |
| PER1     | period circadian clock 1 [Source:HGNC Symbol;Acc:HGNC:8845]                                                                           |
| STC2     | stanniocalcin 2 [Source:HGNC Symbol;Acc:HGNC:11374]                                                                                   |
| ALOX5AP  | arachidonate 5-lipoxygenase activating protein [Source:HGNC Symbol;Acc:HGNC:436]                                                      |
| BDH1     | 3-hydroxybutyrate dehydrogenase, type 1 [Source:HGNC Symbol;Acc:HGNC:1027]                                                            |
| CEACAM1  | carcinoembryonic antigen related cell adhesion molecule 1 [Source:HGNC Symbol;Acc:HGNC:1814]                                          |
| DUT      | deoxyuridine triphosphatase [Source:HGNC Symbol;Acc:HGNC:3078]                                                                        |

|          |                                                                                                 |
|----------|-------------------------------------------------------------------------------------------------|
| ECE1     | endothelin converting enzyme 1 [Source:HGNC Symbol;Acc:HGNC:3146]                               |
| EGR3     | early growth response 3 [Source:HGNC Symbol;Acc:HGNC:3240]                                      |
| EIF2AK2  | eukaryotic translation initiation factor 2 alpha kinase 2 [Source:HGNC Symbol;Acc:HGNC:9437]    |
| ENPP1    | ectonucleotide pyrophosphatase/phosphodiesterase 1 [Source:HGNC Symbol;Acc:HGNC:3356]           |
| FABP7    | fatty acid binding protein 7 [Source:HGNC Symbol;Acc:HGNC:3562]                                 |
| FANCD2   | Fanconi anemia complementation group D2 [Source:HGNC Symbol;Acc:HGNC:3585]                      |
| LIPE     | lipase E, hormone sensitive type [Source:HGNC Symbol;Acc:HGNC:6621]                             |
| NFIX     | nuclear factor I X [Source:HGNC Symbol;Acc:HGNC:7788]                                           |
| NOTCH2   | notch 2 [Source:HGNC Symbol;Acc:HGNC:7882]                                                      |
| PC       | pyruvate carboxylase [Source:HGNC Symbol;Acc:HGNC:8636]                                         |
| PTPRF    | protein tyrosine phosphatase, receptor type F [Source:HGNC Symbol;Acc:HGNC:9670]                |
| RTN4     | reticulon 4 [Source:HGNC Symbol;Acc:HGNC:14085]                                                 |
| SDC2     | syndecan 2 [Source:HGNC Symbol;Acc:HGNC:10659]                                                  |
| TACC3    | transforming acidic coiled-coil containing protein 3 [Source:HGNC Symbol;Acc:HGNC:11524]        |
| TSC2     | tuberous sclerosis 2 [Source:HGNC Symbol;Acc:HGNC:12363]                                        |
| SERPINE2 | serpin family E member 2 [Source:HGNC Symbol;Acc:HGNC:8951]                                     |
| TUBB3    | tubulin beta 3 class III [Source:HGNC Symbol;Acc:HGNC:20772]                                    |
| ARRB2    | arrestin beta 2 [Source:HGNC Symbol;Acc:HGNC:712]                                               |
| CDC45    | cell division cycle 45 [Source:HGNC Symbol;Acc:HGNC:1739]                                       |
| CDT1     | chromatin licensing and DNA replication factor 1 [Source:HGNC Symbol;Acc:HGNC:24576]            |
| CKAP2    | cytoskeleton associated protein 2 [Source:HGNC Symbol;Acc:HGNC:1990]                            |
| ESRRA    | estrogen related receptor alpha [Source:HGNC Symbol;Acc:HGNC:3471]                              |
| GMNN     | geminin, DNA replication inhibitor [Source:HGNC Symbol;Acc:HGNC:17493]                          |
| NCOA3    | nuclear receptor coactivator 3 [Source:HGNC Symbol;Acc:HGNC:7670]                               |
| PSMB8    | proteasome subunit beta 8 [Source:HGNC Symbol;Acc:HGNC:9545]                                    |
| SDF2L1   | stromal cell derived factor 2 like 1 [Source:HGNC Symbol;Acc:HGNC:10676]                        |
| SMAD4    | SMAD family member 4 [Source:HGNC Symbol;Acc:HGNC:6770]                                         |
| TUBA1C   | tubulin alpha 1c [Source:HGNC Symbol;Acc:HGNC:20768]                                            |
| FOSL2    | FOS like 2, AP-1 transcription factor subunit [Source:HGNC Symbol;Acc:HGNC:3798]                |
| SHBG     | sex hormone binding globulin [Source:HGNC Symbol;Acc:HGNC:10839]                                |
| ALDH1B1  | aldehyde dehydrogenase 1 family member B1 [Source:HGNC Symbol;Acc:HGNC:407]                     |
| ASAH1    | N-acylsphingosine amidohydrolase (acid ceramidase) 1 [Source:HGNC Symbol;Acc:HGNC:735]          |
| MCM10    | minichromosome maintenance 10 replication initiation factor [Source:HGNC Symbol;Acc:HGNC:18043] |
| NCOR2    | nuclear receptor corepressor 2 [Source:HGNC Symbol;Acc:HGNC:7673]                               |
| PRKG1    | protein kinase, cGMP-dependent, type I [Source:HGNC Symbol;Acc:HGNC:9414]                       |
| RAD51AP1 | RAD51 associated protein 1 [Source:HGNC Symbol;Acc:HGNC:16956]                                  |
| TFPI2    | tissue factor pathway inhibitor 2 [Source:HGNC Symbol;Acc:HGNC:11761]                           |

|           |                                                                                                                                        |
|-----------|----------------------------------------------------------------------------------------------------------------------------------------|
| TRIP13    | thyroid hormone receptor interactor 13 [Source:HGNC Symbol;Acc:HGNC:12307]                                                             |
| ZBTB16    | zinc finger and BTB domain containing 16 [Source:HGNC Symbol;Acc:HGNC:12930]                                                           |
| GLRX      | glutaredoxin [Source:HGNC Symbol;Acc:HGNC:4330]                                                                                        |
| IDH1      | isocitrate dehydrogenase (NADP(+)) 1, cytosolic [Source:HGNC Symbol;Acc:HGNC:5382]                                                     |
| BMF       | Bcl2 modifying factor [Source:HGNC Symbol;Acc:HGNC:24132]                                                                              |
| CBR3      | carbonyl reductase 3 [Source:HGNC Symbol;Acc:HGNC:1549]                                                                                |
| CIDEA     | cell death-inducing DFFA-like effector a [Source:HGNC Symbol;Acc:HGNC:1976]                                                            |
| EIF5      | eukaryotic translation initiation factor 5 [Source:HGNC Symbol;Acc:HGNC:3299]                                                          |
| ELK1      | ELK1, ETS transcription factor [Source:HGNC Symbol;Acc:HGNC:3321]                                                                      |
| HNRNPA2B1 | heterogeneous nuclear ribonucleoprotein A2/B1 [Source:HGNC Symbol;Acc:HGNC:5033]                                                       |
| ID4       | inhibitor of DNA binding 4, HLH protein [Source:HGNC Symbol;Acc:HGNC:5363]                                                             |
| IDH3A     | isocitrate dehydrogenase 3 (NAD(+)) alpha [Source:HGNC Symbol;Acc:HGNC:5384]                                                           |
| MAP2K3    | mitogen-activated protein kinase kinase 3 [Source:HGNC Symbol;Acc:HGNC:6843]                                                           |
| NQO2      | NAD(P)H quinone dehydrogenase 2 [Source:HGNC Symbol;Acc:HGNC:7856]                                                                     |
| NTS       | neurotensin [Source:HGNC Symbol;Acc:HGNC:8038]                                                                                         |
| PDE4D     | phosphodiesterase 4D [Source:HGNC Symbol;Acc:HGNC:8783]                                                                                |
| PGAM1     | phosphoglycerate mutase 1 [Source:HGNC Symbol;Acc:HGNC:8888]                                                                           |
| PTPN11    | protein tyrosine phosphatase, non-receptor type 11 [Source:HGNC Symbol;Acc:HGNC:9644]                                                  |
| SERPINA7  | serpin family A member 7 [Source:HGNC Symbol;Acc:HGNC:11583]                                                                           |
| TAGLN2    | transgelin 2 [Source:HGNC Symbol;Acc:HGNC:11554]                                                                                       |
| TUBB      | tubulin beta class I [Source:HGNC Symbol;Acc:HGNC:20778]                                                                               |
| USP2      | ubiquitin specific peptidase 2 [Source:HGNC Symbol;Acc:HGNC:12618]                                                                     |
| CPT2      | carnitine palmitoyltransferase 2 [Source:HGNC Symbol;Acc:HGNC:2330]                                                                    |
| PRLR      | prolactin receptor [Source:HGNC Symbol;Acc:HGNC:9446]                                                                                  |
| ABL1      | ABL proto-oncogene 1, non-receptor tyrosine kinase [Source:HGNC Symbol;Acc:HGNC:76]                                                    |
| ATR       | ATR serine/threonine kinase [Source:HGNC Symbol;Acc:HGNC:882]                                                                          |
| AXIN2     | axin 2 [Source:HGNC Symbol;Acc:HGNC:904]                                                                                               |
| CANX      | calnexin [Source:HGNC Symbol;Acc:HGNC:1473]                                                                                            |
| IFITM1    | interferon induced transmembrane protein 1 [Source:HGNC Symbol;Acc:HGNC:5412]                                                          |
| MAT2A     | methionine adenosyltransferase 2A [Source:HGNC Symbol;Acc:HGNC:6904]                                                                   |
| MYCN      | v-myc avian myelocytomatosis viral oncogene neuroblastoma derived homolog [Source:HGNC Symbol;Acc:HGNC:7559]                           |
| NEDD4L    | neural precursor cell expressed, developmentally down-regulated 4-like, E3 ubiquitin protein ligase [Source:HGNC Symbol;Acc:HGNC:7728] |
| PDYN      | prodynorphin [Source:HGNC Symbol;Acc:HGNC:8820]                                                                                        |
| RAD50     | RAD50 double strand break repair protein [Source:HGNC Symbol;Acc:HGNC:9816]                                                            |
| STAT6     | signal transducer and activator of transcription 6 [Source:HGNC Symbol;Acc:HGNC:11368]                                                 |
| TUBB4B    | tubulin beta 4B class IVb [Source:HGNC Symbol;Acc:HGNC:20771]                                                                          |

|         |                                                                                                |
|---------|------------------------------------------------------------------------------------------------|
| TUBB6   | tubulin beta 6 class V [Source:HGNC Symbol;Acc:HGNC:20776]                                     |
| ZWINT   | ZW10 interacting kinetochore protein [Source:HGNC Symbol;Acc:HGNC:13195]                       |
| CHAC1   | ChaC glutathione specific gamma-glutamylcyclotransferase 1 [Source:HGNC Symbol;Acc:HGNC:28680] |
| PENK    | proenkephalin [Source:HGNC Symbol;Acc:HGNC:8831]                                               |
| CA3     | carbonic anhydrase 3 [Source:HGNC Symbol;Acc:HGNC:1374]                                        |
| CCK     | cholecystokinin [Source:HGNC Symbol;Acc:HGNC:1569]                                             |
| CS      | citrate synthase [Source:HGNC Symbol;Acc:HGNC:2422]                                            |
| GATM    | glycine amidinotransferase [Source:HGNC Symbol;Acc:HGNC:4175]                                  |
| LIFR    | leukemia inhibitory factor receptor alpha [Source:HGNC Symbol;Acc:HGNC:6597]                   |
| MYH6    | myosin, heavy chain 6, cardiac muscle, alpha [Source:HGNC Symbol;Acc:HGNC:7576]                |
| SLC1A5  | solute carrier family 1 member 5 [Source:HGNC Symbol;Acc:HGNC:10943]                           |
| SLC31A1 | solute carrier family 31 member 1 [Source:HGNC Symbol;Acc:HGNC:11016]                          |
| SLC8A1  | solute carrier family 8 member A1 [Source:HGNC Symbol;Acc:HGNC:11068]                          |
| TAP1    | transporter 1, ATP-binding cassette, sub-family B (MDR/TAP) [Source:HGNC Symbol;Acc:HGNC:43]   |
| TMPO    | thymopoietin [Source:HGNC Symbol;Acc:HGNC:11875]                                               |
| TOP1    | topoisomerase (DNA) I [Source:HGNC Symbol;Acc:HGNC:11986]                                      |
| TTK     | TTK protein kinase [Source:HGNC Symbol;Acc:HGNC:12401]                                         |
| TUBA4A  | tubulin alpha 4a [Source:HGNC Symbol;Acc:HGNC:12407]                                           |
| UGT1A10 | UDP glucuronosyltransferase family 1 member A10 [Source:HGNC Symbol;Acc:HGNC:12531]            |
| UGT1A3  | UDP glucuronosyltransferase family 1 member A3 [Source:HGNC Symbol;Acc:HGNC:12535]             |
| UGT1A8  | UDP glucuronosyltransferase family 1 member A8 [Source:HGNC Symbol;Acc:HGNC:12540]             |
| SLC6A4  | solute carrier family 6 member 4 [Source:HGNC Symbol;Acc:HGNC:11050]                           |
| ACOT2   | acyl-CoA thioesterase 2 [Source:HGNC Symbol;Acc:HGNC:18431]                                    |
| ACSL4   | acyl-CoA synthetase long-chain family member 4 [Source:HGNC Symbol;Acc:HGNC:3571]              |
| ACTN1   | actinin alpha 1 [Source:HGNC Symbol;Acc:HGNC:163]                                              |
| ARC     | activity-regulated cytoskeleton-associated protein [Source:HGNC Symbol;Acc:HGNC:648]           |
| ATRX    | ATRX, chromatin remodeler [Source:HGNC Symbol;Acc:HGNC:886]                                    |
| ECT2    | epithelial cell transforming 2 [Source:HGNC Symbol;Acc:HGNC:3155]                              |
| ENO3    | enolase 3 [Source:HGNC Symbol;Acc:HGNC:3354]                                                   |
| HK1     | hexokinase 1 [Source:HGNC Symbol;Acc:HGNC:4922]                                                |
| NME1    | NME/NM23 nucleoside diphosphate kinase 1 [Source:HGNC Symbol;Acc:HGNC:7849]                    |
| PLOD2   | procollagen-lysine,2-oxoglutarate 5-dioxygenase 2 [Source:HGNC Symbol;Acc:HGNC:9082]           |
| PML     | promyelocytic leukemia [Source:HGNC Symbol;Acc:HGNC:9113]                                      |
| RCAN1   | regulator of calcineurin 1 [Source:HGNC Symbol;Acc:HGNC:3040]                                  |
| SIGMAR1 | sigma non-opioid intracellular receptor 1 [Source:HGNC Symbol;Acc:HGNC:8157]                   |

|         |                                                                                                                                         |
|---------|-----------------------------------------------------------------------------------------------------------------------------------------|
| SLC1A4  | solute carrier family 1 member 4 [Source:HGNC Symbol;Acc:HGNC:10942]                                                                    |
| SOCS1   | suppressor of cytokine signaling 1 [Source:HGNC Symbol;Acc:HGNC:19383]                                                                  |
| BDKRB2  | bradykinin receptor B2 [Source:HGNC Symbol;Acc:HGNC:1030]                                                                               |
| HSD17B2 | hydroxysteroid 17-beta dehydrogenase 2 [Source:HGNC Symbol;Acc:HGNC:5211]                                                               |
| PLCG1   | phospholipase C gamma 1 [Source:HGNC Symbol;Acc:HGNC:9065]                                                                              |
| S100B   | S100 calcium binding protein B [Source:HGNC Symbol;Acc:HGNC:10500]                                                                      |
| STAT5A  | signal transducer and activator of transcription 5A [Source:HGNC Symbol;Acc:HGNC:11366]                                                 |
| VNN1    | vanin 1 [Source:HGNC Symbol;Acc:HGNC:12705]                                                                                             |
| CKB     | creatine kinase B [Source:HGNC Symbol;Acc:HGNC:1991]                                                                                    |
| AHNAK   | AHNAK nucleoprotein [Source:HGNC Symbol;Acc:HGNC:347]                                                                                   |
| GRIA1   | glutamate ionotropic receptor AMPA type subunit 1 [Source:HGNC Symbol;Acc:HGNC:4571]                                                    |
| GUSB    | glucuronidase beta [Source:HGNC Symbol;Acc:HGNC:4696]                                                                                   |
| HMMR    | hyaluronan mediated motility receptor [Source:HGNC Symbol;Acc:HGNC:5012]                                                                |
| MCM7    | minichromosome maintenance complex component 7 [Source:HGNC Symbol;Acc:HGNC:6950]                                                       |
| NCF2    | neutrophil cytosolic factor 2 [Source:HGNC Symbol;Acc:HGNC:7661]                                                                        |
| NCOR1   | nuclear receptor corepressor 1 [Source:HGNC Symbol;Acc:HGNC:7672]                                                                       |
| PFKP    | phosphofructokinase, platelet [Source:HGNC Symbol;Acc:HGNC:8878]                                                                        |
| PRSS23  | protease, serine 23 [Source:HGNC Symbol;Acc:HGNC:14370]                                                                                 |
| PYGL    | phosphorylase, glycogen, liver [Source:HGNC Symbol;Acc:HGNC:9725]                                                                       |
| RELN    | reelin [Source:HGNC Symbol;Acc:HGNC:9957]                                                                                               |
| RGN     | regucalcin [Source:HGNC Symbol;Acc:HGNC:9989]                                                                                           |
| SESN1   | sestrin 1 [Source:HGNC Symbol;Acc:HGNC:21595]                                                                                           |
| SLC1A1  | solute carrier family 1 member 1 [Source:HGNC Symbol;Acc:HGNC:10939]                                                                    |
| SLC22A7 | solute carrier family 22 member 7 [Source:HGNC Symbol;Acc:HGNC:10971]                                                                   |
| SMAD7   | SMAD family member 7 [Source:HGNC Symbol;Acc:HGNC:6773]                                                                                 |
| CRH     | corticotropin releasing hormone [Source:HGNC Symbol;Acc:HGNC:2355]                                                                      |
| DUSP5   | dual specificity phosphatase 5 [Source:HGNC Symbol;Acc:HGNC:3071]                                                                       |
| EGR2    | early growth response 2 [Source:HGNC Symbol;Acc:HGNC:3239]                                                                              |
| PRKCE   | protein kinase C epsilon [Source:HGNC Symbol;Acc:HGNC:9401]                                                                             |
| GJB2    | gap junction protein beta 2 [Source:HGNC Symbol;Acc:HGNC:4284]                                                                          |
| LIPG    | lipase G, endothelial type [Source:HGNC Symbol;Acc:HGNC:6623]                                                                           |
| MTHFD2  | methylenetetrahydrofolate dehydrogenase (NADP+ dependent) 2, methenyltetrahydrofolate cyclohydrolase [Source:HGNC Symbol;Acc:HGNC:7434] |
| NAT1    | N-acetyltransferase 1 (arylamine N-acetyltransferase) [Source:HGNC Symbol;Acc:HGNC:7645]                                                |
| PROS1   | protein S (alpha) [Source:HGNC Symbol;Acc:HGNC:9456]                                                                                    |
| RRM1    | ribonucleotide reductase catalytic subunit M1 [Source:HGNC Symbol;Acc:HGNC:10451]                                                       |
| SFPQ    | splicing factor proline and glutamine rich [Source:HGNC Symbol;Acc:HGNC:10774]                                                          |
| TNNT2   | troponin T2, cardiac type [Source:HGNC Symbol;Acc:HGNC:11949]                                                                           |

|           |                                                                                               |
|-----------|-----------------------------------------------------------------------------------------------|
| WNT5A     | Wnt family member 5A [Source:HGNC Symbol;Acc:HGNC:12784]                                      |
| HSD11B2   | hydroxysteroid 11-beta dehydrogenase 2 [Source:HGNC Symbol;Acc:HGNC:5209]                     |
| BHMT      | betaine--homocysteine S-methyltransferase [Source:HGNC Symbol;Acc:HGNC:1047]                  |
| CHRM2     | cholinergic receptor muscarinic 2 [Source:HGNC Symbol;Acc:HGNC:1951]                          |
| CHRM3     | cholinergic receptor muscarinic 3 [Source:HGNC Symbol;Acc:HGNC:1952]                          |
| CKS2      | CDC28 protein kinase regulatory subunit 2 [Source:HGNC Symbol;Acc:HGNC:2000]                  |
| EIF4E     | eukaryotic translation initiation factor 4E [Source:HGNC Symbol;Acc:HGNC:3287]                |
| FBP1      | fructose-bisphosphatase 1 [Source:HGNC Symbol;Acc:HGNC:3606]                                  |
| FOXM1     | forkhead box M1 [Source:HGNC Symbol;Acc:HGNC:3818]                                            |
| LDHB      | lactate dehydrogenase B [Source:HGNC Symbol;Acc:HGNC:6541]                                    |
| PDIA4     | protein disulfide isomerase family A member 4 [Source:HGNC Symbol;Acc:HGNC:30167]             |
| CES1      | carboxylesterase 1 [Source:HGNC Symbol;Acc:HGNC:1863]                                         |
| TNFRSF12A | tumor necrosis factor receptor superfamily member 12A [Source:HGNC Symbol;Acc:HGNC:18152]     |
| BRCA2     | BRCA2, DNA repair associated [Source:HGNC Symbol;Acc:HGNC:1101]                               |
| CHRM1     | cholinergic receptor muscarinic 1 [Source:HGNC Symbol;Acc:HGNC:1950]                          |
| DAPK1     | death associated protein kinase 1 [Source:HGNC Symbol;Acc:HGNC:2674]                          |
| ERCC1     | ERCC excision repair 1, endonuclease non-catalytic subunit [Source:HGNC Symbol;Acc:HGNC:3433] |
| GRN       | granulin [Source:HGNC Symbol;Acc:HGNC:4601]                                                   |
| MCM3      | minichromosome maintenance complex component 3 [Source:HGNC Symbol;Acc:HGNC:6945]             |
| NFKBIB    | NFKB inhibitor beta [Source:HGNC Symbol;Acc:HGNC:7798]                                        |
| PFKFB3    | 6-phosphofructo-2-kinase/fructose-2,6-biphosphatase 3 [Source:HGNC Symbol;Acc:HGNC:8874]      |
| PPP1R3C   | protein phosphatase 1 regulatory subunit 3C [Source:HGNC Symbol;Acc:HGNC:9293]                |
| ALAD      | aminolevulinate dehydratase [Source:HGNC Symbol;Acc:HGNC:395]                                 |
| NR4A2     | nuclear receptor subfamily 4 group A member 2 [Source:HGNC Symbol;Acc:HGNC:7981]              |
| TPM1      | tropomyosin 1 (alpha) [Source:HGNC Symbol;Acc:HGNC:12010]                                     |
| ANXA4     | annexin A4 [Source:HGNC Symbol;Acc:HGNC:542]                                                  |
| CDC25B    | cell division cycle 25B [Source:HGNC Symbol;Acc:HGNC:1726]                                    |
| CPT1B     | carnitine palmitoyltransferase 1B [Source:HGNC Symbol;Acc:HGNC:2329]                          |
| CTSS      | cathepsin S [Source:HGNC Symbol;Acc:HGNC:2545]                                                |
| CYP8B1    | cytochrome P450 family 8 subfamily B member 1 [Source:HGNC Symbol;Acc:HGNC:2653]              |
| DIABLO    | diablo IAP-binding mitochondrial protein [Source:HGNC Symbol;Acc:HGNC:21528]                  |
| FYN       | FYN proto-oncogene, Src family tyrosine kinase [Source:HGNC Symbol;Acc:HGNC:4037]             |
| NFKBIZ    | NFKB inhibitor zeta [Source:HGNC Symbol;Acc:HGNC:29805]                                       |
| NREP      | neuronal regeneration related protein [Source:HGNC Symbol;Acc:HGNC:16834]                     |
| PTPN1     | protein tyrosine phosphatase, non-receptor type 1 [Source:HGNC Symbol;Acc:HGNC:9642]          |



|          |                                                                                                  |
|----------|--------------------------------------------------------------------------------------------------|
| SC5D     | sterol-C5-desaturase [Source:HGNC Symbol;Acc:HGNC:10547]                                         |
| SLC20A1  | solute carrier family 20 member 1 [Source:HGNC Symbol;Acc:HGNC:10946]                            |
| UGT2B7   | UDP glucuronosyltransferase family 2 member B7 [Source:HGNC Symbol;Acc:HGNC:12554]               |
| OPRM1    | opioid receptor mu 1 [Source:HGNC Symbol;Acc:HGNC:8156]                                          |
| CD80     | CD80 molecule [Source:HGNC Symbol;Acc:HGNC:1700]                                                 |
| GCK      | glucokinase [Source:HGNC Symbol;Acc:HGNC:4195]                                                   |
| HSPA2    | heat shock protein family A (Hsp70) member 2 [Source:HGNC Symbol;Acc:HGNC:5235]                  |
| UHRF1    | ubiquitin like with PHD and ring finger domains 1 [Source:HGNC Symbol;Acc:HGNC:12556]            |
| CDC20    | cell division cycle 20 [Source:HGNC Symbol;Acc:HGNC:1723]                                        |
| KLF6     | Kruppel like factor 6 [Source:HGNC Symbol;Acc:HGNC:2235]                                         |
| CDC25A   | cell division cycle 25A [Source:HGNC Symbol;Acc:HGNC:1725]                                       |
| CDC6     | cell division cycle 6 [Source:HGNC Symbol;Acc:HGNC:1744]                                         |
| CYP51A1  | cytochrome P450 family 51 subfamily A member 1 [Source:HGNC Symbol;Acc:HGNC:2649]                |
| CYP7B1   | cytochrome P450 family 7 subfamily B member 1 [Source:HGNC Symbol;Acc:HGNC:2652]                 |
| FADD     | Fas associated via death domain [Source:HGNC Symbol;Acc:HGNC:3573]                               |
| FGFR3    | fibroblast growth factor receptor 3 [Source:HGNC Symbol;Acc:HGNC:3690]                           |
| ITGB3    | integrin subunit beta 3 [Source:HGNC Symbol;Acc:HGNC:6156]                                       |
| RET      | ret proto-oncogene [Source:HGNC Symbol;Acc:HGNC:9967]                                            |
| TNFRSF1B | tumor necrosis factor receptor superfamily member 1B [Source:HGNC Symbol;Acc:HGNC:11917]         |
| UCP1     | uncoupling protein 1 [Source:HGNC Symbol;Acc:HGNC:12517]                                         |
| CTH      | cystathionine gamma-lyase [Source:HGNC Symbol;Acc:HGNC:2501]                                     |
| DNM1L    | dynamitin 1-like [Source:HGNC Symbol;Acc:HGNC:2973]                                              |
| ECH1     | enoyl-CoA hydratase 1, peroxisomal [Source:HGNC Symbol;Acc:HGNC:3149]                            |
| HPGD     | hydroxyprostaglandin dehydrogenase 15-(NAD) [Source:HGNC Symbol;Acc:HGNC:5154]                   |
| JAK1     | Janus kinase 1 [Source:HGNC Symbol;Acc:HGNC:6190]                                                |
| LDHA     | lactate dehydrogenase A [Source:HGNC Symbol;Acc:HGNC:6535]                                       |
| NPY      | neuropeptide Y [Source:HGNC Symbol;Acc:HGNC:7955]                                                |
| LMNB1    | lamin B1 [Source:HGNC Symbol;Acc:HGNC:6637]                                                      |
| PDCD4    | programmed cell death 4 (neoplastic transformation inhibitor) [Source:HGNC Symbol;Acc:HGNC:8763] |
| STAT5B   | signal transducer and activator of transcription 5B [Source:HGNC Symbol;Acc:HGNC:11367]          |
| SLC3A2   | solute carrier family 3 member 2 [Source:HGNC Symbol;Acc:HGNC:11026]                             |
| ARG2     | arginase 2 [Source:HGNC Symbol;Acc:HGNC:664]                                                     |
| DDC      | dopa decarboxylase [Source:HGNC Symbol;Acc:HGNC:2719]                                            |
| GLS      | glutaminase [Source:HGNC Symbol;Acc:HGNC:4331]                                                   |
| GNAS     | GNAS complex locus [Source:HGNC Symbol;Acc:HGNC:4392]                                            |

|         |                                                                                       |
|---------|---------------------------------------------------------------------------------------|
| HDAC1   | histone deacetylase 1 [Source:HGNC Symbol;Acc:HGNC:4852]                              |
| HMGB2   | high mobility group box 2 [Source:HGNC Symbol;Acc:HGNC:5000]                          |
| MYLK    | myosin light chain kinase [Source:HGNC Symbol;Acc:HGNC:7590]                          |
| NCOA1   | nuclear receptor coactivator 1 [Source:HGNC Symbol;Acc:HGNC:7668]                     |
| NR1D1   | nuclear receptor subfamily 1 group D member 1 [Source:HGNC Symbol;Acc:HGNC:7962]      |
| PCK2    | phosphoenolpyruvate carboxykinase 2, mitochondrial [Source:HGNC Symbol;Acc:HGNC:8725] |
| SNAI2   | snail family transcriptional repressor 2 [Source:HGNC Symbol;Acc:HGNC:11094]          |
| AOX1    | aldehyde oxidase 1 [Source:HGNC Symbol;Acc:HGNC:553]                                  |
| FMO1    | flavin containing monooxygenase 1 [Source:HGNC Symbol;Acc:HGNC:3769]                  |
| GH1     | growth hormone 1 [Source:HGNC Symbol;Acc:HGNC:4261]                                   |
| HNF4A   | hepatocyte nuclear factor 4 alpha [Source:HGNC Symbol;Acc:HGNC:5024]                  |
| KLF9    | Kruppel like factor 9 [Source:HGNC Symbol;Acc:HGNC:1123]                              |
| CSF1    | colony stimulating factor 1 [Source:HGNC Symbol;Acc:HGNC:2432]                        |
| CYB5A   | cytochrome b5 type A [Source:HGNC Symbol;Acc:HGNC:2570]                               |
| NCOA2   | nuclear receptor coactivator 2 [Source:HGNC Symbol;Acc:HGNC:7669]                     |
| PTGES   | prostaglandin E synthase [Source:HGNC Symbol;Acc:HGNC:9599]                           |
| TUBA1A  | tubulin alpha 1a [Source:HGNC Symbol;Acc:HGNC:20766]                                  |
| CHRNA4  | cholinergic receptor nicotinic alpha 4 subunit [Source:HGNC Symbol;Acc:HGNC:1958]     |
| DHFR    | dihydrofolate reductase [Source:HGNC Symbol;Acc:HGNC:2861]                            |
| ELOVL6  | ELOVL fatty acid elongase 6 [Source:HGNC Symbol;Acc:HGNC:15829]                       |
| IRF1    | interferon regulatory factor 1 [Source:HGNC Symbol;Acc:HGNC:6116]                     |
| S100A4  | S100 calcium binding protein A4 [Source:HGNC Symbol;Acc:HGNC:10494]                   |
| SLC1A2  | solute carrier family 1 member 2 [Source:HGNC Symbol;Acc:HGNC:10940]                  |
| SLC22A6 | solute carrier family 22 member 6 [Source:HGNC Symbol;Acc:HGNC:10970]                 |
| F2R     | coagulation factor II thrombin receptor [Source:HGNC Symbol;Acc:HGNC:3537]            |
| GRIN2B  | glutamate ionotropic receptor NMDA type subunit 2B [Source:HGNC Symbol;Acc:HGNC:4586] |
| PYCARD  | PYD and CARD domain containing [Source:HGNC Symbol;Acc:HGNC:16608]                    |
| TSC22D1 | TSC22 domain family member 1 [Source:HGNC Symbol;Acc:HGNC:16826]                      |
| SGK1    | serum/glucocorticoid regulated kinase 1 [Source:HGNC Symbol;Acc:HGNC:10810]           |
| FDPS    | farnesyl diphosphate synthase [Source:HGNC Symbol;Acc:HGNC:3631]                      |
| GRIN1   | glutamate ionotropic receptor NMDA type subunit 1 [Source:HGNC Symbol;Acc:HGNC:4584]  |
| NAMPT   | nicotinamide phosphoribosyltransferase [Source:HGNC Symbol;Acc:HGNC:30092]            |
| THRSP   | thyroid hormone responsive [Source:HGNC Symbol;Acc:HGNC:11800]                        |
| ACLY    | ATP citrate lyase [Source:HGNC Symbol;Acc:HGNC:115]                                   |
| AURKB   | aurora kinase B [Source:HGNC Symbol;Acc:HGNC:11390]                                   |
| CREBBP  | CREB binding protein [Source:HGNC Symbol;Acc:HGNC:2348]                               |
| CYP2C8  | cytochrome P450 family 2 subfamily C member 8 [Source:HGNC Symbol;Acc:HGNC:2622]      |

|         |                                                                                    |
|---------|------------------------------------------------------------------------------------|
| IGFBP5  | insulin like growth factor binding protein 5 [Source:HGNC Symbol;Acc:HGNC:5474]    |
| SLC7A5  | solute carrier family 7 member 5 [Source:HGNC Symbol;Acc:HGNC:11063]               |
| AKR1C1  | aldo-keto reductase family 1 member C1 [Source:HGNC Symbol;Acc:HGNC:384]           |
| UGT1A9  | UDP glucuronosyltransferase family 1 member A9 [Source:HGNC Symbol;Acc:HGNC:12541] |
| BHLHE40 | basic helix-loop-helix family member e40 [Source:HGNC Symbol;Acc:HGNC:1046]        |
| DIO1    | deiodinase, iodothyronine type I [Source:HGNC Symbol;Acc:HGNC:2883]                |
| HES1    | hes family bHLH transcription factor 1 [Source:HGNC Symbol;Acc:HGNC:5192]          |
| SLC22A8 | solute carrier family 22 member 8 [Source:HGNC Symbol;Acc:HGNC:10972]              |
| TAGLN   | transgelin [Source:HGNC Symbol;Acc:HGNC:11553]                                     |
| SRXN1   | sulfiredoxin 1 [Source:HGNC Symbol;Acc:HGNC:16132]                                 |
| TRIB3   | tribbles pseudokinase 3 [Source:HGNC Symbol;Acc:HGNC:16228]                        |
| FDFT1   | farnesyl-diphosphate farnesyltransferase 1 [Source:HGNC Symbol;Acc:HGNC:3629]      |
| TSC22D3 | TSC22 domain family member 3 [Source:HGNC Symbol;Acc:HGNC:3051]                    |
| CCL20   | C-C motif chemokine ligand 20 [Source:HGNC Symbol;Acc:HGNC:10619]                  |
| CCNG1   | cyclin G1 [Source:HGNC Symbol;Acc:HGNC:1592]                                       |
| CEBPD   | CCAAT/enhancer binding protein delta [Source:HGNC Symbol;Acc:HGNC:1835]            |
| FKBP5   | FK506 binding protein 5 [Source:HGNC Symbol;Acc:HGNC:3721]                         |
| ID3     | inhibitor of DNA binding 3, HLH protein [Source:HGNC Symbol;Acc:HGNC:5362]         |
| CDC25C  | cell division cycle 25C [Source:HGNC Symbol;Acc:HGNC:1727]                         |
| DIO2    | deiodinase, iodothyronine, type II [Source:HGNC Symbol;Acc:HGNC:2884]              |
| IGFBP1  | insulin like growth factor binding protein 1 [Source:HGNC Symbol;Acc:HGNC:5469]    |
| EPHX2   | epoxide hydrolase 2 [Source:HGNC Symbol;Acc:HGNC:3402]                             |
| ID1     | inhibitor of DNA binding 1, HLH protein [Source:HGNC Symbol;Acc:HGNC:5360]         |
| NROB2   | nuclear receptor subfamily 0 group B member 2 [Source:HGNC Symbol;Acc:HGNC:7961]   |
| APAF1   | apoptotic peptidase activating factor 1 [Source:HGNC Symbol;Acc:HGNC:576]          |
| CDK6    | cyclin dependent kinase 6 [Source:HGNC Symbol;Acc:HGNC:1777]                       |
| JAK2    | Janus kinase 2 [Source:HGNC Symbol;Acc:HGNC:6192]                                  |
| NPPB    | natriuretic peptide B [Source:HGNC Symbol;Acc:HGNC:7940]                           |
| BBC3    | BCL2 binding component 3 [Source:HGNC Symbol;Acc:HGNC:17868]                       |
| BTG2    | BTG family member 2 [Source:HGNC Symbol;Acc:HGNC:1131]                             |
| ARG1    | arginase 1 [Source:HGNC Symbol;Acc:HGNC:663]                                       |
| INSIG1  | insulin induced gene 1 [Source:HGNC Symbol;Acc:HGNC:6083]                          |
| ASNS    | asparagine synthetase (glutamine-hydrolyzing) [Source:HGNC Symbol;Acc:HGNC:753]    |
| BCL2L11 | BCL2 like 11 [Source:HGNC Symbol;Acc:HGNC:994]                                     |
| COMT    | catechol-O-methyltransferase [Source:HGNC Symbol;Acc:HGNC:2228]                    |
| SLC2A4  | solute carrier family 2 member 4 [Source:HGNC Symbol;Acc:HGNC:11009]               |
| RXRA    | retinoid X receptor alpha [Source:HGNC Symbol;Acc:HGNC:10477]                      |
| SLC22A2 | solute carrier family 22 member 2 [Source:HGNC Symbol;Acc:HGNC:10966]              |
| HMGCS1  | 3-hydroxy-3-methylglutaryl-CoA synthase 1 [Source:HGNC Symbol;Acc:HGNC:5007]       |
| ABCC4   | ATP binding cassette subfamily C member 4 [Source:HGNC Symbol;Acc:HGNC:55]         |

|           |                                                                                         |
|-----------|-----------------------------------------------------------------------------------------|
| CD86      | CD86 molecule [Source:HGNC Symbol;Acc:HGNC:1705]                                        |
| CYP7A1    | cytochrome P450 family 7 subfamily A member 1 [Source:HGNC Symbol;Acc:HGNC:2651]        |
| SULT1A1   | sulfotransferase family 1A member 1 [Source:HGNC Symbol;Acc:HGNC:11453]                 |
| TOP2A     | topoisomerase (DNA) II alpha [Source:HGNC Symbol;Acc:HGNC:11989]                        |
| CEBPB     | CCAAT/enhancer binding protein beta [Source:HGNC Symbol;Acc:HGNC:1834]                  |
| UGT1A1    | UDP glucuronosyltransferase family 1 member A1 [Source:HGNC Symbol;Acc:HGNC:12530]      |
| CDK2      | cyclin dependent kinase 2 [Source:HGNC Symbol;Acc:HGNC:1771]                            |
| KCNH2     | potassium voltage-gated channel subfamily H member 2 [Source:HGNC Symbol;Acc:HGNC:6251] |
| RB1       | RB transcriptional corepressor 1 [Source:HGNC Symbol;Acc:HGNC:9884]                     |
| BIRC5     | baculoviral IAP repeat containing 5 [Source:HGNC Symbol;Acc:HGNC:593]                   |
| NR1I2     | nuclear receptor subfamily 1 group I member 2 [Source:HGNC Symbol;Acc:HGNC:7968]        |
| CYP3A4    | cytochrome P450 family 3 subfamily A member 4 [Source:HGNC Symbol;Acc:HGNC:2637]        |
| EPC1      | enhancer of polycomb homolog 1 [Source:HGNC Symbol;Acc:HGNC:19876]                      |
| HUS1      | HUS1 checkpoint clamp component [Source:HGNC Symbol;Acc:HGNC:5309]                      |
| OTUD6B    | OTU domain containing 6B [Source:HGNC Symbol;Acc:HGNC:24281]                            |
| WWC2      | WW and C2 domain containing 2 [Source:HGNC Symbol;Acc:HGNC:24148]                       |
| CDR2      | cerebellar degeneration related protein 2 [Source:HGNC Symbol;Acc:HGNC:1799]            |
| PEX5      | peroxisomal biogenesis factor 5 [Source:HGNC Symbol;Acc:HGNC:9719]                      |
| CREB5     | cAMP responsive element binding protein 5 [Source:HGNC Symbol;Acc:HGNC:16844]           |
| CTSG      | cathepsin G [Source:HGNC Symbol;Acc:HGNC:2532]                                          |
| DACT2     | dishevelled binding antagonist of beta catenin 2 [Source:HGNC Symbol;Acc:HGNC:21231]    |
| GABARAPL2 | GABA type A receptor associated protein like 2 [Source:HGNC Symbol;Acc:HGNC:13291]      |
| HIP1      | huntingtin interacting protein 1 [Source:HGNC Symbol;Acc:HGNC:4913]                     |
| MAML1     | mastermind like transcriptional coactivator 1 [Source:HGNC Symbol;Acc:HGNC:13632]       |
| MAML3     | mastermind like transcriptional coactivator 3 [Source:HGNC Symbol;Acc:HGNC:16272]       |
| PPP1CC    | protein phosphatase 1 catalytic subunit gamma [Source:HGNC Symbol;Acc:HGNC:9283]        |
| PPP2R2A   | protein phosphatase 2 regulatory subunit Balpha [Source:HGNC Symbol;Acc:HGNC:9304]      |
| SMAD6     | SMAD family member 6 [Source:HGNC Symbol;Acc:HGNC:6772]                                 |
| SMURF1    | SMAD specific E3 ubiquitin protein ligase 1 [Source:HGNC Symbol;Acc:HGNC:16807]         |
| SMURF2    | SMAD specific E3 ubiquitin protein ligase 2 [Source:HGNC Symbol;Acc:HGNC:16809]         |
| UCHL5     | ubiquitin C-terminal hydrolase L5 [Source:HGNC Symbol;Acc:HGNC:19678]                   |
| ZMYND8    | zinc finger MYND-type containing 8 [Source:HGNC Symbol;Acc:HGNC:9397]                   |
| GABARAPL1 | GABA type A receptor associated protein like 1 [Source:HGNC Symbol;Acc:HGNC:4068]       |
| NBR1      | NBR1, autophagy cargo receptor [Source:HGNC Symbol;Acc:HGNC:6746]                       |
| CD226     | CD226 molecule [Source:HGNC Symbol;Acc:HGNC:16961]                                      |

|           |                                                                                                         |
|-----------|---------------------------------------------------------------------------------------------------------|
| CARTPT    | CART prepropeptide [Source:HGNC Symbol;Acc:HGNC:24323]                                                  |
| SCN2A     | sodium voltage-gated channel alpha subunit 2 [Source:HGNC Symbol;Acc:HGNC:10588]                        |
| PIK3R2    | phosphoinositide-3-kinase regulatory subunit 2 [Source:HGNC Symbol;Acc:HGNC:8980]                       |
| MAP3K8    | mitogen-activated protein kinase kinase kinase 8 [Source:HGNC Symbol;Acc:HGNC:6860]                     |
| TIRAP     | toll-interleukin 1 receptor (TIR) domain containing adaptor protein [Source:HGNC Symbol;Acc:HGNC:17192] |
| TICAM2    | toll like receptor adaptor molecule 2 [Source:HGNC Symbol;Acc:HGNC:21354]                               |
| VPS39     | VPS39, HOPS complex subunit [Source:HGNC Symbol;Acc:HGNC:20593]                                         |
| MTRNR2L13 | MT-RNR2-like 13 [Source:HGNC Symbol;Acc:HGNC:37170]                                                     |
| CLIC5     | chloride intracellular channel 5 [Source:HGNC Symbol;Acc:HGNC:13517]                                    |
| ADGRL3    | adhesion G protein-coupled receptor L3 [Source:HGNC Symbol;Acc:HGNC:20974]                              |
| ACTR6     | ARP6 actin-related protein 6 homolog [Source:HGNC Symbol;Acc:HGNC:24025]                                |
| GLI2      | GLI family zinc finger 2 [Source:HGNC Symbol;Acc:HGNC:4318]                                             |
| GLI3      | GLI family zinc finger 3 [Source:HGNC Symbol;Acc:HGNC:4319]                                             |
| FAM84B    | family with sequence similarity 84 member B [Source:HGNC Symbol;Acc:HGNC:24166]                         |
| TRPC4     | transient receptor potential cation channel subfamily C member 4 [Source:HGNC Symbol;Acc:HGNC:12336]    |
| NMRK2     | nicotinamide riboside kinase 2 [Source:HGNC Symbol;Acc:HGNC:17871]                                      |
| DAPK3     | death associated protein kinase 3 [Source:HGNC Symbol;Acc:HGNC:2676]                                    |
| TDRP      | testis development related protein [Source:HGNC Symbol;Acc:HGNC:26951]                                  |
| WTAP      | Wilms tumor 1 associated protein [Source:HGNC Symbol;Acc:HGNC:16846]                                    |
| DNAJC27   | DnaJ heat shock protein family (Hsp40) member C27 [Source:HGNC Symbol;Acc:HGNC:30290]                   |
| OTOS      | otospiralin [Source:HGNC Symbol;Acc:HGNC:22644]                                                         |
| RHBDD1    | rhomboid domain containing 1 [Source:HGNC Symbol;Acc:HGNC:23081]                                        |
| ZNF341    | zinc finger protein 341 [Source:HGNC Symbol;Acc:HGNC:15992]                                             |
| OR7G3     | olfactory receptor family 7 subfamily G member 3 [Source:HGNC Symbol;Acc:HGNC:8467]                     |
| WBSCR17   | Williams-Beuren syndrome chromosome region 17 [Source:HGNC Symbol;Acc:HGNC:16347]                       |
| ICAM3     | intercellular adhesion molecule 3 [Source:HGNC Symbol;Acc:HGNC:5346]                                    |
| LSM5      | LSM5 homolog, U6 small nuclear RNA and mRNA degradation associated [Source:HGNC Symbol;Acc:HGNC:17162]  |
| NALCN     | sodium leak channel, non-selective [Source:HGNC Symbol;Acc:HGNC:19082]                                  |
| ZNF700    | zinc finger protein 700 [Source:HGNC Symbol;Acc:HGNC:25292]                                             |
| GLIS3     | GLIS family zinc finger 3 [Source:HGNC Symbol;Acc:HGNC:28510]                                           |
| DGKI      | diacylglycerol kinase iota [Source:HGNC Symbol;Acc:HGNC:2855]                                           |
| MSH5      | mutS homolog 5 [Source:HGNC Symbol;Acc:HGNC:7328]                                                       |
| RNF123    | ring finger protein 123 [Source:HGNC Symbol;Acc:HGNC:21148]                                             |
| EMILIN2   | elastin microfibril interfacer 2 [Source:HGNC Symbol;Acc:HGNC:19881]                                    |
| CSNK2B    | casein kinase 2 beta [Source:HGNC Symbol;Acc:HGNC:2460]                                                 |

|          |                                                                                                 |
|----------|-------------------------------------------------------------------------------------------------|
| FAM46A   | family with sequence similarity 46 member A [Source:HGNC Symbol;Acc:HGNC:18345]                 |
| YTHDC1   | YTH domain containing 1 [Source:HGNC Symbol;Acc:HGNC:30626]                                     |
| ERGIC3   | ERGIC and golgi 3 [Source:HGNC Symbol;Acc:HGNC:15927]                                           |
| NAALADL2 | N-acetylated alpha-linked acidic dipeptidase-like 2 [Source:HGNC Symbol;Acc:HGNC:23219]         |
| SLC35C2  | solute carrier family 35 member C2 [Source:HGNC Symbol;Acc:HGNC:17117]                          |
| LAMC3    | laminin subunit gamma 3 [Source:HGNC Symbol;Acc:HGNC:6494]                                      |
| CACNB3   | calcium voltage-gated channel auxiliary subunit beta 3 [Source:HGNC Symbol;Acc:HGNC:1403]       |
| CDK11A   | cyclin dependent kinase 11A [Source:HGNC Symbol;Acc:HGNC:1730]                                  |
| GALNT13  | polypeptide N-acetylgalactosaminyltransferase 13 [Source:HGNC Symbol;Acc:HGNC:23242]            |
| PMPCA    | peptidase, mitochondrial processing alpha subunit [Source:HGNC Symbol;Acc:HGNC:18667]           |
| SNRPB    | small nuclear ribonucleoprotein polypeptides B and B1 [Source:HGNC Symbol;Acc:HGNC:11153]       |
| TSSK2    | testis specific serine kinase 2 [Source:HGNC Symbol;Acc:HGNC:11401]                             |
| XRN1     | 5'-3' exoribonuclease 1 [Source:HGNC Symbol;Acc:HGNC:30654]                                     |
| ITGAX    | integrin subunit alpha X [Source:HGNC Symbol;Acc:HGNC:6152]                                     |
| TGM2     | transglutaminase 2 [Source:HGNC Symbol;Acc:HGNC:11778]                                          |
| ANKH     | ANKH inorganic pyrophosphate transport regulator [Source:HGNC Symbol;Acc:HGNC:15492]            |
| ARFGAP1  | ADP ribosylation factor GTPase activating protein 1 [Source:HGNC Symbol;Acc:HGNC:15852]         |
| CDC37    | cell division cycle 37 [Source:HGNC Symbol;Acc:HGNC:1735]                                       |
| CSNK2A1  | casein kinase 2 alpha 1 [Source:HGNC Symbol;Acc:HGNC:2457]                                      |
| ECSIT    | ECSIT signalling integrator [Source:HGNC Symbol;Acc:HGNC:29548]                                 |
| EPN2     | epsin 2 [Source:HGNC Symbol;Acc:HGNC:18639]                                                     |
| FARSA    | phenylalanyl-tRNA synthetase alpha subunit [Source:HGNC Symbol;Acc:HGNC:3592]                   |
| FBXL12   | F-box and leucine rich repeat protein 12 [Source:HGNC Symbol;Acc:HGNC:13611]                    |
| FXYP7    | FXYP domain containing ion transport regulator 7 [Source:HGNC Symbol;Acc:HGNC:4034]             |
| GCDH     | glutaryl-CoA dehydrogenase [Source:HGNC Symbol;Acc:HGNC:4189]                                   |
| IFIT5    | interferon induced protein with tetratricopeptide repeats 5 [Source:HGNC Symbol;Acc:HGNC:13328] |
| IQSEC1   | IQ motif and Sec7 domain 1 [Source:HGNC Symbol;Acc:HGNC:29112]                                  |
| LOXL4    | lysyl oxidase like 4 [Source:HGNC Symbol;Acc:HGNC:17171]                                        |
| MAST1    | microtubule associated serine/threonine kinase 1 [Source:HGNC Symbol;Acc:HGNC:19034]            |
| NEFM     | neurofilament, medium polypeptide [Source:HGNC Symbol;Acc:HGNC:7734]                            |
| PCMT1    | protein-L-isoaspartate (D-aspartate) O-methyltransferase [Source:HGNC Symbol;Acc:HGNC:8728]     |
| PLEKHA6  | pleckstrin homology domain containing A6 [Source:HGNC Symbol;Acc:HGNC:17053]                    |
| PRAM1    | PML-RARA regulated adaptor molecule 1 [Source:HGNC Symbol;Acc:HGNC:30091]                       |

|          |                                                                                               |
|----------|-----------------------------------------------------------------------------------------------|
| RNF32    | ring finger protein 32 [Source:HGNC Symbol;Acc:HGNC:17118]                                    |
| TMCC2    | transmembrane and coiled-coil domain family 2 [Source:HGNC Symbol;Acc:HGNC:24239]             |
| TYRO3    | TYRO3 protein tyrosine kinase [Source:HGNC Symbol;Acc:HGNC:12446]                             |
| ZNF558   | zinc finger protein 558 [Source:HGNC Symbol;Acc:HGNC:26422]                                   |
| C9orf72  | chromosome 9 open reading frame 72 [Source:HGNC Symbol;Acc:HGNC:28337]                        |
| MORF4L2  | mortality factor 4 like 2 [Source:HGNC Symbol;Acc:HGNC:16849]                                 |
| PIAS2    | protein inhibitor of activated STAT 2 [Source:HGNC Symbol;Acc:HGNC:17311]                     |
| ADHFE1   | alcohol dehydrogenase, iron containing 1 [Source:HGNC Symbol;Acc:HGNC:16354]                  |
| ADAMTS1  | ADAM metalloproteinase with thrombospondin type 1 motif 1 [Source:HGNC Symbol;Acc:HGNC:217]   |
| LYVE1    | lymphatic vessel endothelial hyaluronan receptor 1 [Source:HGNC Symbol;Acc:HGNC:14687]        |
| U2AF1    | U2 small nuclear RNA auxiliary factor 1 [Source:HGNC Symbol;Acc:HGNC:12453]                   |
| VPS35    | VPS35, retromer complex component [Source:HGNC Symbol;Acc:HGNC:13487]                         |
| ARAP1    | ArfGAP with RhoGAP domain, ankyrin repeat and PH domain 1 [Source:HGNC Symbol;Acc:HGNC:16925] |
| DAP3     | death associated protein 3 [Source:HGNC Symbol;Acc:HGNC:2673]                                 |
| ARAP3    | ArfGAP with RhoGAP domain, ankyrin repeat and PH domain 3 [Source:HGNC Symbol;Acc:HGNC:24097] |
| ARMC5    | armadillo repeat containing 5 [Source:HGNC Symbol;Acc:HGNC:25781]                             |
| C11orf1  | chromosome 11 open reading frame 1 [Source:HGNC Symbol;Acc:HGNC:1163]                         |
| C19orf54 | chromosome 19 open reading frame 54 [Source:HGNC Symbol;Acc:HGNC:24758]                       |
| C22orf39 | chromosome 22 open reading frame 39 [Source:HGNC Symbol;Acc:HGNC:27012]                       |
| C9orf24  | chromosome 9 open reading frame 24 [Source:HGNC Symbol;Acc:HGNC:19919]                        |
| CYSRT1   | cysteine rich tail 1 [Source:HGNC Symbol;Acc:HGNC:30529]                                      |
| DAZAP2   | DAZ associated protein 2 [Source:HGNC Symbol;Acc:HGNC:2684]                                   |
| FAM86C1  | family with sequence similarity 86 member C1 [Source:HGNC Symbol;Acc:HGNC:25561]              |
| FBXO34   | F-box protein 34 [Source:HGNC Symbol;Acc:HGNC:20201]                                          |
| FRS3     | fibroblast growth factor receptor substrate 3 [Source:HGNC Symbol;Acc:HGNC:16970]             |
| GLYR1    | glyoxylate reductase 1 homolog [Source:HGNC Symbol;Acc:HGNC:24434]                            |
| INCA1    | inhibitor of CDK, cyclin A1 interacting protein 1 [Source:HGNC Symbol;Acc:HGNC:32224]         |
| KLHL12   | kelch like family member 12 [Source:HGNC Symbol;Acc:HGNC:19360]                               |
| KLHL20   | kelch like family member 20 [Source:HGNC Symbol;Acc:HGNC:25056]                               |
| KRT40    | keratin 40 [Source:HGNC Symbol;Acc:HGNC:26707]                                                |
| LIMS1    | LIM zinc finger domain containing 1 [Source:HGNC Symbol;Acc:HGNC:6616]                        |
| NADSYN1  | NAD synthetase 1 [Source:HGNC Symbol;Acc:HGNC:29832]                                          |
| NOTCH2NL | notch 2 N-terminal like [Source:HGNC Symbol;Acc:HGNC:31862]                                   |
| RHBDD2   | rhomboid domain containing 2 [Source:HGNC Symbol;Acc:HGNC:23082]                              |
| SLC35A2  | solute carrier family 35 member A2 [Source:HGNC Symbol;Acc:HGNC:11022]                        |
| TMEM256  | transmembrane protein 256 [Source:HGNC Symbol;Acc:HGNC:28618]                                 |

|          |                                                                                                                      |
|----------|----------------------------------------------------------------------------------------------------------------------|
| TRIM35   | tripartite motif containing 35 [Source:HGNC Symbol;Acc:HGNC:16285]                                                   |
| UBQLN2   | ubiquilin 2 [Source:HGNC Symbol;Acc:HGNC:12509]                                                                      |
| UBQLN4   | ubiquilin 4 [Source:HGNC Symbol;Acc:HGNC:1237]                                                                       |
| VAC14    | Vac14, PIKFYVE complex component [Source:HGNC Symbol;Acc:HGNC:25507]                                                 |
| YPEL3    | yippee like 3 [Source:HGNC Symbol;Acc:HGNC:18327]                                                                    |
| ZNF720   | zinc finger protein 720 [Source:HGNC Symbol;Acc:HGNC:26987]                                                          |
| ZNF774   | zinc finger protein 774 [Source:HGNC Symbol;Acc:HGNC:33108]                                                          |
| ZNHIT1   | zinc finger HIT-type containing 1 [Source:HGNC Symbol;Acc:HGNC:21688]                                                |
| ACVR1    | activin A receptor type 1 [Source:HGNC Symbol;Acc:HGNC:171]                                                          |
| APPL1    | adaptor protein, phosphotyrosine interacting with PH domain and leucine zipper 1 [Source:HGNC Symbol;Acc:HGNC:24035] |
| BAMBI    | BMP and activin membrane bound inhibitor [Source:HGNC Symbol;Acc:HGNC:30251]                                         |
| FNTA     | farnesyltransferase, CAAX box, alpha [Source:HGNC Symbol;Acc:HGNC:3782]                                              |
| OTUB1    | OTU deubiquitinase, ubiquitin aldehyde binding 1 [Source:HGNC Symbol;Acc:HGNC:23077]                                 |
| RANBP9   | RAN binding protein 9 [Source:HGNC Symbol;Acc:HGNC:13727]                                                            |
| ADAMTS18 | ADAM metallopeptidase with thrombospondin type 1 motif 18 [Source:HGNC Symbol;Acc:HGNC:17110]                        |
| ADAMTSL1 | ADAMTS like 1 [Source:HGNC Symbol;Acc:HGNC:14632]                                                                    |
| MEOX2    | mesenchyme homeobox 2 [Source:HGNC Symbol;Acc:HGNC:7014]                                                             |
| RPAIN    | RPA interacting protein [Source:HGNC Symbol;Acc:HGNC:28641]                                                          |
| CACTIN   | cactin, spliceosome C complex subunit [Source:HGNC Symbol;Acc:HGNC:29938]                                            |
| CCDC57   | coiled-coil domain containing 57 [Source:HGNC Symbol;Acc:HGNC:27564]                                                 |
| MTUS2    | microtubule associated tumor suppressor candidate 2 [Source:HGNC Symbol;Acc:HGNC:20595]                              |
| NELFB    | negative elongation factor complex member B [Source:HGNC Symbol;Acc:HGNC:24324]                                      |
| NELFCD   | negative elongation factor complex member C/D [Source:HGNC Symbol;Acc:HGNC:15934]                                    |
| VAMP3    | vesicle associated membrane protein 3 [Source:HGNC Symbol;Acc:HGNC:12644]                                            |
| GZMK     | granzyme K [Source:HGNC Symbol;Acc:HGNC:4711]                                                                        |
| UFD1L    | ubiquitin fusion degradation 1 like (yeast) [Source:HGNC Symbol;Acc:HGNC:12520]                                      |
| VCP      | valosin containing protein [Source:HGNC Symbol;Acc:HGNC:12666]                                                       |
| YOD1     | YOD1 deubiquitinase [Source:HGNC Symbol;Acc:HGNC:25035]                                                              |
| DNPH1    | 2'-deoxynucleoside 5'-phosphate N-hydrolase 1 [Source:HGNC Symbol;Acc:HGNC:21218]                                    |
| PTPN6    | protein tyrosine phosphatase, non-receptor type 6 [Source:HGNC Symbol;Acc:HGNC:9658]                                 |
| SDCBP    | syndecan binding protein [Source:HGNC Symbol;Acc:HGNC:10662]                                                         |
| 1-Dec    | deleted in esophageal cancer 1 [Source:HGNC Symbol;Acc:HGNC:23658]                                                   |
| AES      | amino-terminal enhancer of split [Source:HGNC Symbol;Acc:HGNC:307]                                                   |
| ANKS1A   | ankyrin repeat and sterile alpha motif domain containing 1A [Source:HGNC Symbol;Acc:HGNC:20961]                      |



|          |                                                                                                                                       |
|----------|---------------------------------------------------------------------------------------------------------------------------------------|
| CLOCK    | clock circadian regulator [Source:HGNC Symbol;Acc:HGNC:2082]                                                                          |
| NSD1     | nuclear receptor binding SET domain protein 1 [Source:HGNC Symbol;Acc:HGNC:14234]                                                     |
| PSMC4    | proteasome 26S subunit, ATPase 4 [Source:HGNC Symbol;Acc:HGNC:9551]                                                                   |
| RORC     | RAR related orphan receptor C [Source:HGNC Symbol;Acc:HGNC:10260]                                                                     |
| SCNM1    | sodium channel modifier 1 [Source:HGNC Symbol;Acc:HGNC:23136]                                                                         |
| SMARCD1  | SWI/SNF related, matrix associated, actin dependent regulator of chromatin, subfamily d, member 1 [Source:HGNC Symbol;Acc:HGNC:11106] |
| UBE2I    | ubiquitin conjugating enzyme E2 I [Source:HGNC Symbol;Acc:HGNC:12485]                                                                 |
| ZNF587   | zinc finger protein 587 [Source:HGNC Symbol;Acc:HGNC:30955]                                                                           |
| H3F3A    | H3 histone, family 3A [Source:HGNC Symbol;Acc:HGNC:4764]                                                                              |
| ADPRH    | ADP-ribosylarginine hydrolase [Source:HGNC Symbol;Acc:HGNC:269]                                                                       |
| AHCYL1   | adenosylhomocysteinase like 1 [Source:HGNC Symbol;Acc:HGNC:344]                                                                       |
| ALKBH3   | alkB homolog 3, alpha-ketoglutaratedependent dioxygenase [Source:HGNC Symbol;Acc:HGNC:30141]                                          |
| AMMECR1L | AMMECR1 like [Source:HGNC Symbol;Acc:HGNC:28658]                                                                                      |
| ANK3     | ankyrin 3, node of Ranvier (ankyrin G) [Source:HGNC Symbol;Acc:HGNC:494]                                                              |
| ANKFY1   | ankyrin repeat and FYVE domain containing 1 [Source:HGNC Symbol;Acc:HGNC:20763]                                                       |
| ANKRD35  | ankyrin repeat domain 35 [Source:HGNC Symbol;Acc:HGNC:26323]                                                                          |
| AP1M1    | adaptor related protein complex 1 mu 1 subunit [Source:HGNC Symbol;Acc:HGNC:13667]                                                    |
| APOBEC3C | apolipoprotein B mRNA editing enzyme catalytic subunit 3C [Source:HGNC Symbol;Acc:HGNC:17353]                                         |
| ARGLU1   | arginine and glutamate rich 1 [Source:HGNC Symbol;Acc:HGNC:25482]                                                                     |
| ARHGAP12 | Rho GTPase activating protein 12 [Source:HGNC Symbol;Acc:HGNC:16348]                                                                  |
| ARL6IP4  | ADP ribosylation factor like GTPase 6 interacting protein 4 [Source:HGNC Symbol;Acc:HGNC:18076]                                       |
| ASL      | argininosuccinate lyase [Source:HGNC Symbol;Acc:HGNC:746]                                                                             |
| BAIAP2   | BAI1 associated protein 2 [Source:HGNC Symbol;Acc:HGNC:947]                                                                           |
| BAZ1A    | bromodomain adjacent to zinc finger domain 1A [Source:HGNC Symbol;Acc:HGNC:960]                                                       |
| BCL9L    | B-cell CLL/lymphoma 9-like [Source:HGNC Symbol;Acc:HGNC:23688]                                                                        |
| BCLAF1   | BCL2 associated transcription factor 1 [Source:HGNC Symbol;Acc:HGNC:16863]                                                            |
| BRD3     | bromodomain containing 3 [Source:HGNC Symbol;Acc:HGNC:1104]                                                                           |
| C18orf25 | chromosome 18 open reading frame 25 [Source:HGNC Symbol;Acc:HGNC:28172]                                                               |
| C1orf35  | chromosome 1 open reading frame 35 [Source:HGNC Symbol;Acc:HGNC:19032]                                                                |
| C5orf42  | chromosome 5 open reading frame 42 [Source:HGNC Symbol;Acc:HGNC:25801]                                                                |
| CACNG2   | calcium voltage-gated channel auxiliary subunit gamma 2 [Source:HGNC Symbol;Acc:HGNC:1406]                                            |
| CALCOCO1 | calcium binding and coiled-coil domain 1 [Source:HGNC Symbol;Acc:HGNC:29306]                                                          |
| CAMSAP1  | calmodulin regulated spectrin associated protein 1 [Source:HGNC Symbol;Acc:HGNC:19946]                                                |
| CAND1    | cullin associated and neddylation dissociated 1 [Source:HGNC Symbol;Acc:HGNC:30688]                                                   |

|          |                                                                                       |
|----------|---------------------------------------------------------------------------------------|
| CARD11   | caspase recruitment domain family member 11 [Source:HGNC Symbol;Acc:HGNC:16393]       |
| CASK     | calcium/calmodulin dependent serine protein kinase [Source:HGNC Symbol;Acc:HGNC:1497] |
| CCDC28A  | coiled-coil domain containing 28A [Source:HGNC Symbol;Acc:HGNC:21098]                 |
| CCDC86   | coiled-coil domain containing 86 [Source:HGNC Symbol;Acc:HGNC:28359]                  |
| CCM2     | CCM2 scaffolding protein [Source:HGNC Symbol;Acc:HGNC:21708]                          |
| CDC42EP4 | CDC42 effector protein 4 [Source:HGNC Symbol;Acc:HGNC:17147]                          |
| CDK13    | cyclin dependent kinase 13 [Source:HGNC Symbol;Acc:HGNC:1733]                         |
| CDK7     | cyclin dependent kinase 7 [Source:HGNC Symbol;Acc:HGNC:1778]                          |
| CEP170   | centrosomal protein 170 [Source:HGNC Symbol;Acc:HGNC:28920]                           |
| CHD1L    | chromodomain helicase DNA binding protein 1 like [Source:HGNC Symbol;Acc:HGNC:1916]   |
| CHERP    | calcium homeostasis endoplasmic reticulum protein [Source:HGNC Symbol;Acc:HGNC:16930] |
| CHTOP    | chromatin target of PRMT1 [Source:HGNC Symbol;Acc:HGNC:24511]                         |
| CLASP1   | cytoplasmic linker associated protein 1 [Source:HGNC Symbol;Acc:HGNC:17088]           |
| CLASP2   | cytoplasmic linker associated protein 2 [Source:HGNC Symbol;Acc:HGNC:17078]           |
| CLASRP   | CLK4 associating serine/arginine rich protein [Source:HGNC Symbol;Acc:HGNC:17731]     |
| CLCNKA   | chloride voltage-gated channel Ka [Source:HGNC Symbol;Acc:HGNC:2026]                  |
| CLK2     | CDC like kinase 2 [Source:HGNC Symbol;Acc:HGNC:2069]                                  |
| CLK3     | CDC like kinase 3 [Source:HGNC Symbol;Acc:HGNC:2071]                                  |
| CPSF7    | cleavage and polyadenylation specific factor 7 [Source:HGNC Symbol;Acc:HGNC:30098]    |
| CRTC1    | CREB regulated transcription coactivator 1 [Source:HGNC Symbol;Acc:HGNC:16062]        |
| CTNBL1   | catenin beta like 1 [Source:HGNC Symbol;Acc:HGNC:15879]                               |
| DBF4B    | DBF4 zinc finger B [Source:HGNC Symbol;Acc:HGNC:17883]                                |
| DCAF10   | DDB1 and CUL4 associated factor 10 [Source:HGNC Symbol;Acc:HGNC:23686]                |
| DDX39B   | DEAD-box helicase 39B [Source:HGNC Symbol;Acc:HGNC:13917]                             |
| DDX3X    | DEAD-box helicase 3, X-linked [Source:HGNC Symbol;Acc:HGNC:2745]                      |
| DDX46    | DEAD-box helicase 46 [Source:HGNC Symbol;Acc:HGNC:18681]                              |
| DDX6     | DEAD-box helicase 6 [Source:HGNC Symbol;Acc:HGNC:2747]                                |
| DHX8     | DEAH-box helicase 8 [Source:HGNC Symbol;Acc:HGNC:2749]                                |
| DIDO1    | death inducer-obliterator 1 [Source:HGNC Symbol;Acc:HGNC:2680]                        |
| DNAH9    | dynein axonemal heavy chain 9 [Source:HGNC Symbol;Acc:HGNC:2953]                      |
| DNAJC8   | DnaJ heat shock protein family (Hsp40) member C8 [Source:HGNC Symbol;Acc:HGNC:15470]  |
| DOCK3    | dedicator of cytokinesis 3 [Source:HGNC Symbol;Acc:HGNC:2989]                         |
| DRAP1    | DR1 associated protein 1 [Source:HGNC Symbol;Acc:HGNC:3019]                           |
| DRG1     | developmentally regulated GTP binding protein 1 [Source:HGNC Symbol;Acc:HGNC:3029]    |
| EFCAB12  | EF-hand calcium binding domain 12 [Source:HGNC Symbol;Acc:HGNC:28061]                 |
| EGLN2    | egl-9 family hypoxia inducible factor 2 [Source:HGNC Symbol;Acc:HGNC:14660]           |

|           |                                                                                                      |
|-----------|------------------------------------------------------------------------------------------------------|
| EIF1AY    | eukaryotic translation initiation factor 1A, Y-linked [Source:HGNC Symbol;Acc:HGNC:3252]             |
| ELAVL3    | ELAV like neuron-specific RNA binding protein 3 [Source:HGNC Symbol;Acc:HGNC:3314]                   |
| ELP6      | elongator acetyltransferase complex subunit 6 [Source:HGNC Symbol;Acc:HGNC:25976]                    |
| ENOX2     | ecto-NOX disulfide-thiol exchanger 2 [Source:HGNC Symbol;Acc:HGNC:2259]                              |
| ENSA      | endosulfine alpha [Source:HGNC Symbol;Acc:HGNC:3360]                                                 |
| EPM2A     | epilepsy, progressive myoclonus type 2A, Lafora disease (laforin) [Source:HGNC Symbol;Acc:HGNC:3413] |
| ERC1      | ELKS/RAB6-interacting/CAST family member 1 [Source:HGNC Symbol;Acc:HGNC:17072]                       |
| EVI5L     | ecotropic viral integration site 5 like [Source:HGNC Symbol;Acc:HGNC:30464]                          |
| FAM76B    | family with sequence similarity 76 member B [Source:HGNC Symbol;Acc:HGNC:28492]                      |
| FBXO24    | F-box protein 24 [Source:HGNC Symbol;Acc:HGNC:13595]                                                 |
| FCHO1     | FCH domain only 1 [Source:HGNC Symbol;Acc:HGNC:29002]                                                |
| FGF12     | fibroblast growth factor 12 [Source:HGNC Symbol;Acc:HGNC:3668]                                       |
| FIP1L1    | factor interacting with PAPOLA and CPSF1 [Source:HGNC Symbol;Acc:HGNC:19124]                         |
| FMNL1     | formin like 1 [Source:HGNC Symbol;Acc:HGNC:1212]                                                     |
| FXR2      | FMR1 autosomal homolog 2 [Source:HGNC Symbol;Acc:HGNC:4024]                                          |
| GBF1      | golgi brefeldin A resistant guanine nucleotide exchange factor 1 [Source:HGNC Symbol;Acc:HGNC:4181]  |
| GCC2      | GRIP and coiled-coil domain containing 2 [Source:HGNC Symbol;Acc:HGNC:23218]                         |
| GGCX      | gamma-glutamyl carboxylase [Source:HGNC Symbol;Acc:HGNC:4247]                                        |
| GSE1      | Gse1 coiled-coil protein [Source:HGNC Symbol;Acc:HGNC:28979]                                         |
| GTF2E1    | general transcription factor IIE subunit 1 [Source:HGNC Symbol;Acc:HGNC:4650]                        |
| GTPBP4    | GTP binding protein 4 [Source:HGNC Symbol;Acc:HGNC:21535]                                            |
| GXYLT2    | glucoside xylosyltransferase 2 [Source:HGNC Symbol;Acc:HGNC:33383]                                   |
| HERC3     | HECT and RLD domain containing E3 ubiquitin protein ligase 3 [Source:HGNC Symbol;Acc:HGNC:4876]      |
| HIST1H2BK | histone cluster 1, H2bk [Source:HGNC Symbol;Acc:HGNC:13954]                                          |
| HMGA1     | high mobility group AT-hook 1 [Source:HGNC Symbol;Acc:HGNC:5010]                                     |
| HMGN3     | high mobility group nucleosomal binding domain 3 [Source:HGNC Symbol;Acc:HGNC:12312]                 |
| HMGXB4    | HMG-box containing 4 [Source:HGNC Symbol;Acc:HGNC:5003]                                              |
| HNRNPC    | heterogeneous nuclear ribonucleoprotein C (C1/C2) [Source:HGNC Symbol;Acc:HGNC:5035]                 |
| HOMER3    | homer scaffolding protein 3 [Source:HGNC Symbol;Acc:HGNC:17514]                                      |
| HTATSF1   | HIV-1 Tat specific factor 1 [Source:HGNC Symbol;Acc:HGNC:5276]                                       |
| ISLR      | immunoglobulin superfamily containing leucine rich repeat [Source:HGNC Symbol;Acc:HGNC:6133]         |
| JMJD1C    | jumonji domain containing 1C [Source:HGNC Symbol;Acc:HGNC:12313]                                     |
| KCNN2     | potassium calcium-activated channel subfamily N member 2 [Source:HGNC Symbol;Acc:HGNC:6291]          |

|          |                                                                                                |
|----------|------------------------------------------------------------------------------------------------|
| LRRN4CL  | LRRN4 C-terminal like [Source:HGNC Symbol;Acc:HGNC:33724]                                      |
| LUC7L    | LUC7 like [Source:HGNC Symbol;Acc:HGNC:6723]                                                   |
| LUC7L2   | LUC7-like 2 pre-mRNA splicing factor [Source:HGNC Symbol;Acc:HGNC:21608]                       |
| LUC7L3   | LUC7 like 3 pre-mRNA splicing factor [Source:HGNC Symbol;Acc:HGNC:24309]                       |
| MAB21L2  | mab-21 like 2 [Source:HGNC Symbol;Acc:HGNC:6758]                                               |
| MACF1    | microtubule-actin crosslinking factor 1 [Source:HGNC Symbol;Acc:HGNC:13664]                    |
| MAP1S    | microtubule associated protein 1S [Source:HGNC Symbol;Acc:HGNC:15715]                          |
| MAP7D1   | MAP7 domain containing 1 [Source:HGNC Symbol;Acc:HGNC:25514]                                   |
| MAPKAPK5 | mitogen-activated protein kinase-activated protein kinase 5 [Source:HGNC Symbol;Acc:HGNC:6889] |
| MAPRE1   | microtubule associated protein RP/EB family member 1 [Source:HGNC Symbol;Acc:HGNC:6890]        |
| MAST2    | microtubule associated serine/threonine kinase 2 [Source:HGNC Symbol;Acc:HGNC:19035]           |
| MCOLN3   | mucolipin 3 [Source:HGNC Symbol;Acc:HGNC:13358]                                                |
| MDC1     | mediator of DNA damage checkpoint 1 [Source:HGNC Symbol;Acc:HGNC:21163]                        |
| MDK      | midkine (neurite growth-promoting factor 2) [Source:HGNC Symbol;Acc:HGNC:6972]                 |
| MFSD10   | major facilitator superfamily domain containing 10 [Source:HGNC Symbol;Acc:HGNC:16894]         |
| MIB2     | mindbomb E3 ubiquitin protein ligase 2 [Source:HGNC Symbol;Acc:HGNC:30577]                     |
| MIPOL1   | mirror-image polydactyly 1 [Source:HGNC Symbol;Acc:HGNC:21460]                                 |
| MPP3     | membrane palmitoylated protein 3 [Source:HGNC Symbol;Acc:HGNC:7221]                            |
| MTCL1    | microtubule crosslinking factor 1 [Source:HGNC Symbol;Acc:HGNC:29121]                          |
| MYCBP2   | MYC binding protein 2, E3 ubiquitin protein ligase [Source:HGNC Symbol;Acc:HGNC:23386]         |
| MYO1E    | myosin IE [Source:HGNC Symbol;Acc:HGNC:7599]                                                   |
| MZT2B    | mitotic spindle organizing protein 2B [Source:HGNC Symbol;Acc:HGNC:25886]                      |
| NADK     | NAD kinase [Source:HGNC Symbol;Acc:HGNC:29831]                                                 |
| NAGK     | N-acetylglucosamine kinase [Source:HGNC Symbol;Acc:HGNC:17174]                                 |
| NCBP3    | nuclear cap binding subunit 3 [Source:HGNC Symbol;Acc:HGNC:24612]                              |
| NCK2     | NCK adaptor protein 2 [Source:HGNC Symbol;Acc:HGNC:7665]                                       |
| NGDN     | neuroguidin [Source:HGNC Symbol;Acc:HGNC:20271]                                                |
| NGLY1    | N-glycanase 1 [Source:HGNC Symbol;Acc:HGNC:17646]                                              |
| NKAP     | NFKB activating protein [Source:HGNC Symbol;Acc:HGNC:29873]                                    |
| NPM2     | nucleophosmin/nucleoplasmin 2 [Source:HGNC Symbol;Acc:HGNC:7930]                               |
| NSMCE4A  | NSE4 homolog A, SMC5-SMC6 complex component [Source:HGNC Symbol;Acc:HGNC:25935]                |
| NTHL1    | nth-like DNA glycosylase 1 [Source:HGNC Symbol;Acc:HGNC:8028]                                  |
| NUP50    | nucleoporin 50 [Source:HGNC Symbol;Acc:HGNC:8065]                                              |
| NXF1     | nuclear RNA export factor 1 [Source:HGNC Symbol;Acc:HGNC:8071]                                 |
| NXT2     | nuclear transport factor 2 like export factor 2 [Source:HGNC Symbol;Acc:HGNC:18151]            |
| OCEL1    | occludin/ELL domain containing 1 [Source:HGNC Symbol;Acc:HGNC:26221]                           |
| PABPC4   | poly(A) binding protein cytoplasmic 4 [Source:HGNC Symbol;Acc:HGNC:8557]                       |

|         |                                                                                              |
|---------|----------------------------------------------------------------------------------------------|
| PAK4    | p21 (RAC1) activated kinase 4 [Source:HGNC Symbol;Acc:HGNC:16059]                            |
| PALLD   | palladin, cytoskeletal associated protein [Source:HGNC Symbol;Acc:HGNC:17068]                |
| PCBP1   | poly(rC) binding protein 1 [Source:HGNC Symbol;Acc:HGNC:8647]                                |
| PDCL3   | phosducin like 3 [Source:HGNC Symbol;Acc:HGNC:28860]                                         |
| PDE7B   | phosphodiesterase 7B [Source:HGNC Symbol;Acc:HGNC:8792]                                      |
| PNISR   | PNN interacting serine and arginine rich protein [Source:HGNC Symbol;Acc:HGNC:21222]         |
| PPHLN1  | periphilin 1 [Source:HGNC Symbol;Acc:HGNC:19369]                                             |
| PPIL1   | peptidylprolyl isomerase like 1 [Source:HGNC Symbol;Acc:HGNC:9260]                           |
| PRPF38A | pre-mRNA processing factor 38A [Source:HGNC Symbol;Acc:HGNC:25930]                           |
| PRPF38B | pre-mRNA processing factor 38B [Source:HGNC Symbol;Acc:HGNC:25512]                           |
| PRRC2B  | proline rich coiled-coil 2B [Source:HGNC Symbol;Acc:HGNC:28121]                              |
| PRRC2C  | proline rich coiled-coil 2C [Source:HGNC Symbol;Acc:HGNC:24903]                              |
| PSMA3   | proteasome subunit alpha 3 [Source:HGNC Symbol;Acc:HGNC:9532]                                |
| PSMD13  | proteasome 26S subunit, non-ATPase 13 [Source:HGNC Symbol;Acc:HGNC:9558]                     |
| PTBP1   | polypyrimidine tract binding protein 1 [Source:HGNC Symbol;Acc:HGNC:9583]                    |
| RABEP1  | rabaptin, RAB GTPase binding effector protein 1 [Source:HGNC Symbol;Acc:HGNC:17677]          |
| RBM15B  | RNA binding motif protein 15B [Source:HGNC Symbol;Acc:HGNC:24303]                            |
| RBM23   | RNA binding motif protein 23 [Source:HGNC Symbol;Acc:HGNC:20155]                             |
| RBMX    | RNA binding motif protein, X-linked [Source:HGNC Symbol;Acc:HGNC:9910]                       |
| RIT1    | Ras like without CAAX 1 [Source:HGNC Symbol;Acc:HGNC:10023]                                  |
| RIT2    | Ras like without CAAX 2 [Source:HGNC Symbol;Acc:HGNC:10017]                                  |
| RNF219  | ring finger protein 219 [Source:HGNC Symbol;Acc:HGNC:20308]                                  |
| RNPS1   | RNA binding protein with serine rich domain 1 [Source:HGNC Symbol;Acc:HGNC:10080]            |
| RPL39L  | ribosomal protein L39 like [Source:HGNC Symbol;Acc:HGNC:17094]                               |
| RPL41   | ribosomal protein L41 [Source:HGNC Symbol;Acc:HGNC:10354]                                    |
| RPS26   | ribosomal protein S26 [Source:HGNC Symbol;Acc:HGNC:10414]                                    |
| RSL1D1  | ribosomal L1 domain containing 1 [Source:HGNC Symbol;Acc:HGNC:24534]                         |
| RSRC2   | arginine and serine rich coiled-coil 2 [Source:HGNC Symbol;Acc:HGNC:30559]                   |
| RWDD2B  | RWD domain containing 2B [Source:HGNC Symbol;Acc:HGNC:1302]                                  |
| RXFP1   | relaxin/insulin like family peptide receptor 1 [Source:HGNC Symbol;Acc:HGNC:19718]           |
| SAFB    | scaffold attachment factor B [Source:HGNC Symbol;Acc:HGNC:10520]                             |
| SART1   | squamous cell carcinoma antigen recognized by T-cells 1 [Source:HGNC Symbol;Acc:HGNC:10538]  |
| SBK1    | SH3 domain binding kinase 1 [Source:HGNC Symbol;Acc:HGNC:17699]                              |
| SDK2    | sidekick cell adhesion molecule 2 [Source:HGNC Symbol;Acc:HGNC:19308]                        |
| SDR42E1 | short chain dehydrogenase/reductase family 42E, member 1 [Source:HGNC Symbol;Acc:HGNC:29834] |
| SEC16B  | SEC16 homolog B, endoplasmic reticulum export factor [Source:HGNC Symbol;Acc:HGNC:30301]     |
| SEC23B  | Sec23 homolog B, coat complex II component [Source:HGNC Symbol;Acc:HGNC:10702]               |

|         |                                                                                                                  |
|---------|------------------------------------------------------------------------------------------------------------------|
| SGPL1   | sphingosine-1-phosphate lyase 1 [Source:HGNC Symbol;Acc:HGNC:10817]                                              |
| SIPA1L3 | signal induced proliferation associated 1 like 3 [Source:HGNC Symbol;Acc:HGNC:23801]                             |
| SLAIN2  | SLAIN motif family member 2 [Source:HGNC Symbol;Acc:HGNC:29282]                                                  |
| SLC13A2 | solute carrier family 13 member 2 [Source:HGNC Symbol;Acc:HGNC:10917]                                            |
| SLC17A6 | solute carrier family 17 member 6 [Source:HGNC Symbol;Acc:HGNC:16703]                                            |
| SLFN5   | schlafen family member 5 [Source:HGNC Symbol;Acc:HGNC:28286]                                                     |
| SLTM    | SAFB like transcription modulator [Source:HGNC Symbol;Acc:HGNC:20709]                                            |
| SMCHD1  | structural maintenance of chromosomes flexible hinge domain containing 1 [Source:HGNC Symbol;Acc:HGNC:29090]     |
| SNIP1   | Smad nuclear interacting protein 1 [Source:HGNC Symbol;Acc:HGNC:30587]                                           |
| SNRNP27 | small nuclear ribonucleoprotein U4/U6.U5 subunit 27 [Source:HGNC Symbol;Acc:HGNC:30240]                          |
| SNRNP70 | small nuclear ribonucleoprotein U1 subunit 70 [Source:HGNC Symbol;Acc:HGNC:11150]                                |
| SNURF   | SNRPN upstream reading frame [Source:HGNC Symbol;Acc:HGNC:11171]                                                 |
| SON     | SON DNA binding protein [Source:HGNC Symbol;Acc:HGNC:11183]                                                      |
| SRSF12  | serine and arginine rich splicing factor 12 [Source:HGNC Symbol;Acc:HGNC:21220]                                  |
| SRSF3   | serine and arginine rich splicing factor 3 [Source:HGNC Symbol;Acc:HGNC:10785]                                   |
| SRSF6   | serine and arginine rich splicing factor 6 [Source:HGNC Symbol;Acc:HGNC:10788]                                   |
| SRSF8   | serine and arginine rich splicing factor 8 [Source:HGNC Symbol;Acc:HGNC:16988]                                   |
| SRSF9   | serine and arginine rich splicing factor 9 [Source:HGNC Symbol;Acc:HGNC:10791]                                   |
| STON1   | stonin 1 [Source:HGNC Symbol;Acc:HGNC:17003]                                                                     |
| SUPT16H | SPT16 homolog, facilitates chromatin remodeling subunit [Source:HGNC Symbol;Acc:HGNC:11465]                      |
| TCEANC2 | transcription elongation factor A N-terminal and central domain containing 2 [Source:HGNC Symbol;Acc:HGNC:26494] |
| TJP2    | tight junction protein 2 [Source:HGNC Symbol;Acc:HGNC:11828]                                                     |
| TLE4    | transducin like enhancer of split 4 [Source:HGNC Symbol;Acc:HGNC:11840]                                          |
| TMEM57  | transmembrane protein 57 [Source:HGNC Symbol;Acc:HGNC:25572]                                                     |
| TNIP2   | TNFAIP3 interacting protein 2 [Source:HGNC Symbol;Acc:HGNC:19118]                                                |
| TPD52   | tumor protein D52 [Source:HGNC Symbol;Acc:HGNC:12005]                                                            |
| TRIM41  | tripartite motif containing 41 [Source:HGNC Symbol;Acc:HGNC:19013]                                               |
| TRIP12  | thyroid hormone receptor interactor 12 [Source:HGNC Symbol;Acc:HGNC:12306]                                       |
| TUBA1B  | tubulin alpha 1b [Source:HGNC Symbol;Acc:HGNC:18809]                                                             |
| U2AF2   | U2 small nuclear RNA auxiliary factor 2 [Source:HGNC Symbol;Acc:HGNC:23156]                                      |
| UBE2E2  | ubiquitin conjugating enzyme E2 E2 [Source:HGNC Symbol;Acc:HGNC:12478]                                           |
| UBR4    | ubiquitin protein ligase E3 component n-recognin 4 [Source:HGNC Symbol;Acc:HGNC:30313]                           |
| VAV2    | vav guanine nucleotide exchange factor 2 [Source:HGNC Symbol;Acc:HGNC:12658]                                     |
| WDR70   | WD repeat domain 70 [Source:HGNC Symbol;Acc:HGNC:25495]                                                          |
| XRCC5   | X-ray repair cross complementing 5 [Source:HGNC Symbol;Acc:HGNC:12833]                                           |
| YTHDC2  | YTH domain containing 2 [Source:HGNC Symbol;Acc:HGNC:24721]                                                      |

|         |                                                                                                         |
|---------|---------------------------------------------------------------------------------------------------------|
| ZC3H13  | zinc finger CCCH-type containing 13 [Source:HGNC Symbol;Acc:HGNC:20368]                                 |
| ZC3H18  | zinc finger CCCH-type containing 18 [Source:HGNC Symbol;Acc:HGNC:25091]                                 |
| ZCCHC17 | zinc finger CCHC-type containing 17 [Source:HGNC Symbol;Acc:HGNC:30246]                                 |
| ZDHHC5  | zinc finger DHHC-type containing 5 [Source:HGNC Symbol;Acc:HGNC:18472]                                  |
| ZFC3H1  | zinc finger C3H1-type containing [Source:HGNC Symbol;Acc:HGNC:28328]                                    |
| ZFHX4   | zinc finger homeobox 4 [Source:HGNC Symbol;Acc:HGNC:30939]                                              |
| ZMAT4   | zinc finger matrin-type 4 [Source:HGNC Symbol;Acc:HGNC:25844]                                           |
| ZMYM4   | zinc finger MYM-type containing 4 [Source:HGNC Symbol;Acc:HGNC:13055]                                   |
| ZNF140  | zinc finger protein 140 [Source:HGNC Symbol;Acc:HGNC:12925]                                             |
| ZNF234  | zinc finger protein 234 [Source:HGNC Symbol;Acc:HGNC:13027]                                             |
| ZNF529  | zinc finger protein 529 [Source:HGNC Symbol;Acc:HGNC:29328]                                             |
| ZNF592  | zinc finger protein 592 [Source:HGNC Symbol;Acc:HGNC:28986]                                             |
| ZNF593  | zinc finger protein 593 [Source:HGNC Symbol;Acc:HGNC:30943]                                             |
| ZNF616  | zinc finger protein 616 [Source:HGNC Symbol;Acc:HGNC:28062]                                             |
| ZRSR2   | zinc finger CCCH-type, RNA binding motif and serine/arginine rich 2 [Source:HGNC Symbol;Acc:HGNC:23019] |
| ZSCAN9  | zinc finger and SCAN domain containing 9 [Source:HGNC Symbol;Acc:HGNC:12984]                            |
| COL4A5  | collagen type IV alpha 5 chain [Source:HGNC Symbol;Acc:HGNC:2207]                                       |
| ATXN10  | ataxin 10 [Source:HGNC Symbol;Acc:HGNC:10549]                                                           |
| LNX1    | ligand of numb-protein X 1 [Source:HGNC Symbol;Acc:HGNC:6657]                                           |
| SNTA1   | syntrophin alpha 1 [Source:HGNC Symbol;Acc:HGNC:11167]                                                  |
| SNTB1   | syntrophin beta 1 [Source:HGNC Symbol;Acc:HGNC:11168]                                                   |
| SNTB2   | syntrophin beta 2 [Source:HGNC Symbol;Acc:HGNC:11169]                                                   |
| MESDC2  | mesoderm development candidate 2 [Source:HGNC Symbol;Acc:HGNC:13520]                                    |
| SGTB    | small glutamine rich tetratricopeptide repeat containing beta [Source:HGNC Symbol;Acc:HGNC:23567]       |
| UBQLN1  | ubiquilin 1 [Source:HGNC Symbol;Acc:HGNC:12508]                                                         |
| ZNF177  | zinc finger protein 177 [Source:HGNC Symbol;Acc:HGNC:12966]                                             |
| FBXW11  | F-box and WD repeat domain containing 11 [Source:HGNC Symbol;Acc:HGNC:13607]                            |
| ARL13B  | ADP ribosylation factor like GTPase 13B [Source:HGNC Symbol;Acc:HGNC:25419]                             |
| BCL2L13 | BCL2 like 13 [Source:HGNC Symbol;Acc:HGNC:17164]                                                        |
| CLSTN3  | calsyntenin 3 [Source:HGNC Symbol;Acc:HGNC:18371]                                                       |
| CPLX4   | complexin 4 [Source:HGNC Symbol;Acc:HGNC:24330]                                                         |
| FKBP7   | FK506 binding protein 7 [Source:HGNC Symbol;Acc:HGNC:3723]                                              |
| GPR37L1 | G protein-coupled receptor 37 like 1 [Source:HGNC Symbol;Acc:HGNC:14923]                                |
| IFNGR2  | interferon gamma receptor 2 (interferon gamma transducer 1) [Source:HGNC Symbol;Acc:HGNC:5440]          |
| LIME1   | Lck interacting transmembrane adaptor 1 [Source:HGNC Symbol;Acc:HGNC:26016]                             |
| LRRC59  | leucine rich repeat containing 59 [Source:HGNC Symbol;Acc:HGNC:28817]                                   |
| MTIF3   | mitochondrial translational initiation factor 3 [Source:HGNC Symbol;Acc:HGNC:29788]                     |
| NDUFAF1 | NADH:ubiquinone oxidoreductase complex assembly factor 1 [Source:HGNC Symbol;Acc:HGNC:18828]            |

|          |                                                                                                |
|----------|------------------------------------------------------------------------------------------------|
| NDUFAF2  | NADH:ubiquinone oxidoreductase complex assembly factor 2 [Source:HGNC Symbol;Acc:HGNC:28086]   |
| PDCD1LG2 | programmed cell death 1 ligand 2 [Source:HGNC Symbol;Acc:HGNC:18731]                           |
| PLP1     | proteolipid protein 1 [Source:HGNC Symbol;Acc:HGNC:9086]                                       |
| RHCG     | Rh family C glycoprotein [Source:HGNC Symbol;Acc:HGNC:18140]                                   |
| RNF170   | ring finger protein 170 [Source:HGNC Symbol;Acc:HGNC:25358]                                    |
| SLC14A1  | solute carrier family 14 member 1 (Kidd blood group) [Source:HGNC Symbol;Acc:HGNC:10918]       |
| TMEM14B  | transmembrane protein 14B [Source:HGNC Symbol;Acc:HGNC:21384]                                  |
| ADTRP    | androgen dependent TFPI regulating protein [Source:HGNC Symbol;Acc:HGNC:21214]                 |
| AMPH     | amphiphysin [Source:HGNC Symbol;Acc:HGNC:471]                                                  |
| CD247    | CD247 molecule [Source:HGNC Symbol;Acc:HGNC:1677]                                              |
| COP55    | COP9 signalosome subunit 5 [Source:HGNC Symbol;Acc:HGNC:2240]                                  |
| CRADD    | CASP2 and RIPK1 domain containing adaptor with death domain [Source:HGNC Symbol;Acc:HGNC:2340] |
| DLG2     | discs large MAGUK scaffold protein 2 [Source:HGNC Symbol;Acc:HGNC:2901]                        |
| DLG3     | discs large MAGUK scaffold protein 3 [Source:HGNC Symbol;Acc:HGNC:2902]                        |
| GLUD1    | glutamate dehydrogenase 1 [Source:HGNC Symbol;Acc:HGNC:4335]                                   |
| GOPC     | golgi associated PDZ and coiled-coil motif containing [Source:HGNC Symbol;Acc:HGNC:17643]      |
| LNK2     | ligand of numb-protein X 2 [Source:HGNC Symbol;Acc:HGNC:20421]                                 |
| PRDX4    | peroxiredoxin 4 [Source:HGNC Symbol;Acc:HGNC:17169]                                            |
| RHOXF1   | Rhox homeobox family member 1 [Source:HGNC Symbol;Acc:HGNC:29993]                              |
| SIX1     | SIX homeobox 1 [Source:HGNC Symbol;Acc:HGNC:10887]                                             |
| SNTG1    | syntrophin gamma 1 [Source:HGNC Symbol;Acc:HGNC:13740]                                         |
| COL9A2   | collagen type IX alpha 2 [Source:HGNC Symbol;Acc:HGNC:2218]                                    |
| CALM2    | calmodulin 2 (phosphorylase kinase, delta) [Source:HGNC Symbol;Acc:HGNC:1445]                  |
| CALM3    | calmodulin 3 (phosphorylase kinase, delta) [Source:HGNC Symbol;Acc:HGNC:1449]                  |
| CCNH     | cyclin H [Source:HGNC Symbol;Acc:HGNC:1594]                                                    |
| CTDP1    | CTD phosphatase subunit 1 [Source:HGNC Symbol;Acc:HGNC:2498]                                   |
| GTF2F1   | general transcription factor IIF subunit 1 [Source:HGNC Symbol;Acc:HGNC:4652]                  |
| GTF2F2   | general transcription factor IIF subunit 2 [Source:HGNC Symbol;Acc:HGNC:4653]                  |
| ITCH     | itchy E3 ubiquitin protein ligase [Source:HGNC Symbol;Acc:HGNC:13890]                          |
| POLR2A   | polymerase (RNA) II subunit A [Source:HGNC Symbol;Acc:HGNC:9187]                               |
| POLR2C   | polymerase (RNA) II subunit C [Source:HGNC Symbol;Acc:HGNC:9189]                               |
| POLR2H   | polymerase (RNA) II subunit H [Source:HGNC Symbol;Acc:HGNC:9195]                               |
| SUB1     | SUB1 homolog, transcriptional regulator [Source:HGNC Symbol;Acc:HGNC:19985]                    |
| TCEA1    | transcription elongation factor A1 [Source:HGNC Symbol;Acc:HGNC:11612]                         |
| ZSCAN1   | zinc finger and SCAN domain containing 1 [Source:HGNC Symbol;Acc:HGNC:23712]                   |
| CHMP3    | charged multivesicular body protein 3 [Source:HGNC Symbol;Acc:HGNC:29865]                      |
| EGFL7    | EGF like domain multiple 7 [Source:HGNC Symbol;Acc:HGNC:20594]                                 |
| C14orf2  | chromosome 14 open reading frame 2 [Source:HGNC Symbol;Acc:HGNC:1188]                          |



|          |                                                                                                    |
|----------|----------------------------------------------------------------------------------------------------|
| HMSD     | histocompatibility minor serpin domain containing [Source:HGNC Symbol;Acc:HGNC:23037]              |
| LETMD1   | LETM1 domain containing 1 [Source:HGNC Symbol;Acc:HGNC:24241]                                      |
| MPC2     | mitochondrial pyruvate carrier 2 [Source:HGNC Symbol;Acc:HGNC:24515]                               |
| MTERF3   | mitochondrial transcription termination factor 3 [Source:HGNC Symbol;Acc:HGNC:24258]               |
| NFU1     | NFU1 iron-sulfur cluster scaffold [Source:HGNC Symbol;Acc:HGNC:16287]                              |
| RADIL    | Rap associating with DIL domain [Source:HGNC Symbol;Acc:HGNC:22226]                                |
| SIRPB1   | signal regulatory protein beta 1 [Source:HGNC Symbol;Acc:HGNC:15928]                               |
| SPG21    | spastic paraplegia 21 (autosomal recessive, Mast syndrome) [Source:HGNC Symbol;Acc:HGNC:20373]     |
| DVL2     | dishevelled segment polarity protein 2 [Source:HGNC Symbol;Acc:HGNC:3086]                          |
| RPS15    | ribosomal protein S15 [Source:HGNC Symbol;Acc:HGNC:10388]                                          |
| UMPS     | uridine monophosphate synthetase [Source:HGNC Symbol;Acc:HGNC:12563]                               |
| ATXN1    | ataxin 1 [Source:HGNC Symbol;Acc:HGNC:10548]                                                       |
| KDM1A    | lysine demethylase 1A [Source:HGNC Symbol;Acc:HGNC:29079]                                          |
| PIAS1    | protein inhibitor of activated STAT 1 [Source:HGNC Symbol;Acc:HGNC:2752]                           |
| TLE1     | transducin like enhancer of split 1 [Source:HGNC Symbol;Acc:HGNC:11837]                            |
| TLE2     | transducin like enhancer of split 2 [Source:HGNC Symbol;Acc:HGNC:11838]                            |
| TPRN     | taperin [Source:HGNC Symbol;Acc:HGNC:26894]                                                        |
| FLRT3    | fibronectin leucine rich transmembrane protein 3 [Source:HGNC Symbol;Acc:HGNC:3762]                |
| SAMM50   | SAMM50 sorting and assembly machinery component [Source:HGNC Symbol;Acc:HGNC:24276]                |
| PCOLCE   | procollagen C-endopeptidase enhancer [Source:HGNC Symbol;Acc:HGNC:8738]                            |
| POU6F2   | POU class 6 homeobox 2 [Source:HGNC Symbol;Acc:HGNC:21694]                                         |
| ANKRD49  | ankyrin repeat domain 49 [Source:HGNC Symbol;Acc:HGNC:25970]                                       |
| CALCOCO2 | calcium binding and coiled-coil domain 2 [Source:HGNC Symbol;Acc:HGNC:29912]                       |
| RBCK1    | RANBP2-type and C3HC4-type zinc finger containing 1 [Source:HGNC Symbol;Acc:HGNC:15864]            |
| UNC119   | unc-119 lipid binding chaperone [Source:HGNC Symbol;Acc:HGNC:12565]                                |
| SEC22A   | SEC22 homolog A, vesicle trafficking protein [Source:HGNC Symbol;Acc:HGNC:20260]                   |
| CDYL     | chromodomain protein, Y-like [Source:HGNC Symbol;Acc:HGNC:1811]                                    |
| TBP      | TATA-box binding protein [Source:HGNC Symbol;Acc:HGNC:11588]                                       |
| CAMLG    | calcium modulating ligand [Source:HGNC Symbol;Acc:HGNC:1471]                                       |
| CD79A    | CD79a molecule [Source:HGNC Symbol;Acc:HGNC:1698]                                                  |
| PPP2R5B  | protein phosphatase 2 regulatory subunit B'beta [Source:HGNC Symbol;Acc:HGNC:9310]                 |
| SGTA     | small glutamine rich tetratricopeptide repeat containing alpha [Source:HGNC Symbol;Acc:HGNC:10819] |
| SLC13A4  | solute carrier family 13 member 4 [Source:HGNC Symbol;Acc:HGNC:15827]                              |
| TMBIM6   | transmembrane BAX inhibitor motif containing 6 [Source:HGNC Symbol;Acc:HGNC:11723]                 |

|          |                                                                                                                             |
|----------|-----------------------------------------------------------------------------------------------------------------------------|
| TMX2     | thioredoxin related transmembrane protein 2 [Source:HGNC Symbol;Acc:HGNC:30739]                                             |
| NUDT3    | nudix hydrolase 3 [Source:HGNC Symbol;Acc:HGNC:8050]                                                                        |
| SNAPIN   | SNAP associated protein [Source:HGNC Symbol;Acc:HGNC:17145]                                                                 |
| SNRNP40  | small nuclear ribonucleoprotein U5 subunit 40 [Source:HGNC Symbol;Acc:HGNC:30857]                                           |
| ATF5     | activating transcription factor 5 [Source:HGNC Symbol;Acc:HGNC:790]                                                         |
| CRKL     | v-crk avian sarcoma virus CT10 oncogene homolog-like [Source:HGNC Symbol;Acc:HGNC:2363]                                     |
| ANKRD46  | ankyrin repeat domain 46 [Source:HGNC Symbol;Acc:HGNC:27229]                                                                |
| MGAT5B   | mannosyl (alpha-1,6-)-glycoprotein beta-1,6-N-acetyl-glucosaminyltransferase, isozyme B [Source:HGNC Symbol;Acc:HGNC:24140] |
| SUFU     | SUFU negative regulator of hedgehog signaling [Source:HGNC Symbol;Acc:HGNC:16466]                                           |
| ZIC1     | Zic family member 1 [Source:HGNC Symbol;Acc:HGNC:12872]                                                                     |
| BTRC     | beta-transducin repeat containing E3 ubiquitin protein ligase [Source:HGNC Symbol;Acc:HGNC:1144]                            |
| CSNK1A1  | casein kinase 1 alpha 1 [Source:HGNC Symbol;Acc:HGNC:2451]                                                                  |
| MED12    | mediator complex subunit 12 [Source:HGNC Symbol;Acc:HGNC:11957]                                                             |
| SPOP     | speckle type BTB/POZ protein [Source:HGNC Symbol;Acc:HGNC:11254]                                                            |
| ZIC2     | Zic family member 2 [Source:HGNC Symbol;Acc:HGNC:12873]                                                                     |
| ZIC3     | Zic family member 3 [Source:HGNC Symbol;Acc:HGNC:12874]                                                                     |
| BAG4     | BCL2 associated athanogene 4 [Source:HGNC Symbol;Acc:HGNC:940]                                                              |
| DDIT4L   | DNA damage inducible transcript 4 like [Source:HGNC Symbol;Acc:HGNC:30555]                                                  |
| FGFR4    | fibroblast growth factor receptor 4 [Source:HGNC Symbol;Acc:HGNC:3691]                                                      |
| TAX1BP1  | Tax1 binding protein 1 [Source:HGNC Symbol;Acc:HGNC:11575]                                                                  |
| XRCC3    | X-ray repair cross complementing 3 [Source:HGNC Symbol;Acc:HGNC:12830]                                                      |
| TRAPPC2L | trafficking protein particle complex 2-like [Source:HGNC Symbol;Acc:HGNC:30887]                                             |
| LRP12    | LDL receptor related protein 12 [Source:HGNC Symbol;Acc:HGNC:31708]                                                         |
| AK3      | adenylate kinase 3 [Source:HGNC Symbol;Acc:HGNC:17376]                                                                      |
| MYL12B   | myosin light chain 12B [Source:HGNC Symbol;Acc:HGNC:29827]                                                                  |
| RAD21    | RAD21 cohesin complex component [Source:HGNC Symbol;Acc:HGNC:9811]                                                          |
| TCP10L   | t-complex 10-like [Source:HGNC Symbol;Acc:HGNC:11657]                                                                       |
| ATP5J2   | ATP synthase, H+ transporting, mitochondrial Fo complex subunit F2 [Source:HGNC Symbol;Acc:HGNC:848]                        |
| DUS2     | dihydrouridine synthase 2 [Source:HGNC Symbol;Acc:HGNC:26014]                                                               |
| MDFI     | MyoD family inhibitor [Source:HGNC Symbol;Acc:HGNC:6967]                                                                    |
| NECTIN1  | nectin cell adhesion molecule 1 [Source:HGNC Symbol;Acc:HGNC:9706]                                                          |
| USP53    | ubiquitin specific peptidase 53 [Source:HGNC Symbol;Acc:HGNC:29255]                                                         |
| APTX     | aprataxin [Source:HGNC Symbol;Acc:HGNC:15984]                                                                               |
| ATN1     | atrophin 1 [Source:HGNC Symbol;Acc:HGNC:3033]                                                                               |
| CCNT1    | cyclin T1 [Source:HGNC Symbol;Acc:HGNC:1599]                                                                                |
| CDK9     | cyclin dependent kinase 9 [Source:HGNC Symbol;Acc:HGNC:1780]                                                                |
| CTDSP1   | CTD small phosphatase 1 [Source:HGNC Symbol;Acc:HGNC:21614]                                                                 |

|          |                                                                                                                   |
|----------|-------------------------------------------------------------------------------------------------------------------|
| CTDSPL   | CTD small phosphatase like [Source:HGNC Symbol;Acc:HGNC:16890]                                                    |
| HLA-DRA  | major histocompatibility complex, class II, DR alpha [Source:HGNC Symbol;Acc:HGNC:4947]                           |
| HLA-DRB5 | major histocompatibility complex, class II, DR beta 5 [Source:HGNC Symbol;Acc:HGNC:4953]                          |
| IKBKE    | inhibitor of kappa light polypeptide gene enhancer in B-cells, kinase epsilon [Source:HGNC Symbol;Acc:HGNC:14552] |
| IRAK4    | interleukin 1 receptor associated kinase 4 [Source:HGNC Symbol;Acc:HGNC:17967]                                    |
| MAP3K3   | mitogen-activated protein kinase kinase kinase 3 [Source:HGNC Symbol;Acc:HGNC:6855]                               |
| PKN1     | protein kinase N1 [Source:HGNC Symbol;Acc:HGNC:9405]                                                              |
| PPP2R5C  | protein phosphatase 2 regulatory subunit B'gamma [Source:HGNC Symbol;Acc:HGNC:9311]                               |
| PRKDC    | protein kinase, DNA-activated, catalytic polypeptide [Source:HGNC Symbol;Acc:HGNC:9413]                           |
| PRMT5    | protein arginine methyltransferase 5 [Source:HGNC Symbol;Acc:HGNC:10894]                                          |
| RPS6KA5  | ribosomal protein S6 kinase A5 [Source:HGNC Symbol;Acc:HGNC:10434]                                                |
| STK3     | serine/threonine kinase 3 [Source:HGNC Symbol;Acc:HGNC:11406]                                                     |
| IKZF1    | IKAROS family zinc finger 1 [Source:HGNC Symbol;Acc:HGNC:13176]                                                   |
| TAB1     | TGF-beta activated kinase 1/MAP3K7 binding protein 1 [Source:HGNC Symbol;Acc:HGNC:18157]                          |
| VPS52    | VPS52, GARP complex subunit [Source:HGNC Symbol;Acc:HGNC:10518]                                                   |
| ASCC2    | activating signal cointegrator 1 complex subunit 2 [Source:HGNC Symbol;Acc:HGNC:24103]                            |
| CEP126   | centrosomal protein 126 [Source:HGNC Symbol;Acc:HGNC:29264]                                                       |
| COPS6    | COP9 signalosome subunit 6 [Source:HGNC Symbol;Acc:HGNC:21749]                                                    |
| EMD      | emerin [Source:HGNC Symbol;Acc:HGNC:3331]                                                                         |
| PTPN4    | protein tyrosine phosphatase, non-receptor type 4 [Source:HGNC Symbol;Acc:HGNC:9656]                              |
| UBE2Z    | ubiquitin conjugating enzyme E2 Z [Source:HGNC Symbol;Acc:HGNC:25847]                                             |
| SCN5A    | sodium voltage-gated channel alpha subunit 5 [Source:HGNC Symbol;Acc:HGNC:10593]                                  |
| SCN8A    | sodium voltage-gated channel alpha subunit 8 [Source:HGNC Symbol;Acc:HGNC:10596]                                  |
| FBXO25   | F-box protein 25 [Source:HGNC Symbol;Acc:HGNC:13596]                                                              |
| C11orf68 | chromosome 11 open reading frame 68 [Source:HGNC Symbol;Acc:HGNC:28801]                                           |
| CSTF2    | cleavage stimulation factor subunit 2 [Source:HGNC Symbol;Acc:HGNC:2484]                                          |
| PTK6     | protein tyrosine kinase 6 [Source:HGNC Symbol;Acc:HGNC:9617]                                                      |
| WDYHV1   | WDYHV motif containing 1 [Source:HGNC Symbol;Acc:HGNC:25490]                                                      |
| ZDHHC17  | zinc finger DHHC-type containing 17 [Source:HGNC Symbol;Acc:HGNC:18412]                                           |
| LDB2     | LIM domain binding 2 [Source:HGNC Symbol;Acc:HGNC:6533]                                                           |
| BRICD5   | BRICHOS domain containing 5 [Source:HGNC Symbol;Acc:HGNC:28309]                                                   |
| MSN      | moesin [Source:HGNC Symbol;Acc:HGNC:7373]                                                                         |
| NINJ2    | ninjurin 2 [Source:HGNC Symbol;Acc:HGNC:7825]                                                                     |

|         |                                                                                                           |
|---------|-----------------------------------------------------------------------------------------------------------|
| SFTPC   | surfactant protein C [Source:HGNC Symbol;Acc:HGNC:10802]                                                  |
| SMCO4   | single-pass membrane protein with coiled-coil domains 4 [Source:HGNC Symbol;Acc:HGNC:24810]               |
| SMIM1   | small integral membrane protein 1 (Vel blood group) [Source:HGNC Symbol;Acc:HGNC:44204]                   |
| CACNA1A | calcium voltage-gated channel subunit alpha1 A [Source:HGNC Symbol;Acc:HGNC:1388]                         |
| ZNF441  | zinc finger protein 441 [Source:HGNC Symbol;Acc:HGNC:20875]                                               |
| EXOSC5  | exosome component 5 [Source:HGNC Symbol;Acc:HGNC:24662]                                                   |
| LSM7    | LSM7 homolog, U6 small nuclear RNA and mRNA degradation associated [Source:HGNC Symbol;Acc:HGNC:20470]    |
| PLK3    | polo like kinase 3 [Source:HGNC Symbol;Acc:HGNC:2154]                                                     |
| PCBD2   | pterin-4 alpha-carbinolamine dehydratase 2 [Source:HGNC Symbol;Acc:HGNC:24474]                            |
| SUOX    | sulfite oxidase [Source:HGNC Symbol;Acc:HGNC:11460]                                                       |
| TSNAX   | translin associated factor X [Source:HGNC Symbol;Acc:HGNC:12380]                                          |
| ZGPAT   | zinc finger CCCH-type and G-patch domain containing [Source:HGNC Symbol;Acc:HGNC:15948]                   |
| APOL2   | apolipoprotein L2 [Source:HGNC Symbol;Acc:HGNC:619]                                                       |
| RAB27A  | RAB27A, member RAS oncogene family [Source:HGNC Symbol;Acc:HGNC:9766]                                     |
| CIB1    | calcium and integrin binding 1 [Source:HGNC Symbol;Acc:HGNC:16920]                                        |
| TRIP6   | thyroid hormone receptor interactor 6 [Source:HGNC Symbol;Acc:HGNC:12311]                                 |
| ABI2    | abl interactor 2 [Source:HGNC Symbol;Acc:HGNC:24011]                                                      |
| APC     | adenomatous polyposis coli [Source:HGNC Symbol;Acc:HGNC:583]                                              |
| ARFIP2  | ADP ribosylation factor interacting protein 2 [Source:HGNC Symbol;Acc:HGNC:17160]                         |
| ARL6IP1 | ADP ribosylation factor like GTPase 6 interacting protein 1 [Source:HGNC Symbol;Acc:HGNC:697]             |
| ARMC8   | armadillo repeat containing 8 [Source:HGNC Symbol;Acc:HGNC:24999]                                         |
| ATXN1L  | ataxin 1 like [Source:HGNC Symbol;Acc:HGNC:33279]                                                         |
| BEGAIN  | brain enriched guanylate kinase associated [Source:HGNC Symbol;Acc:HGNC:24163]                            |
| CCDC103 | coiled-coil domain containing 103 [Source:HGNC Symbol;Acc:HGNC:32700]                                     |
| CEP57L1 | centrosomal protein 57 like 1 [Source:HGNC Symbol;Acc:HGNC:21561]                                         |
| CRMP1   | collapsin response mediator protein 1 [Source:HGNC Symbol;Acc:HGNC:2365]                                  |
| DCTN2   | dynactin subunit 2 [Source:HGNC Symbol;Acc:HGNC:2712]                                                     |
| DGCR6   | DiGeorge syndrome critical region gene 6 [Source:HGNC Symbol;Acc:HGNC:2846]                               |
| ESRRG   | estrogen related receptor gamma [Source:HGNC Symbol;Acc:HGNC:3474]                                        |
| EXOC7   | exocyst complex component 7 [Source:HGNC Symbol;Acc:HGNC:23214]                                           |
| EXOC8   | exocyst complex component 8 [Source:HGNC Symbol;Acc:HGNC:24659]                                           |
| GGA2    | golgi associated, gamma adaptin ear containing, ARF binding protein 2 [Source:HGNC Symbol;Acc:HGNC:16064] |
| GGA3    | golgi associated, gamma adaptin ear containing, ARF binding protein 3 [Source:HGNC Symbol;Acc:HGNC:17079] |
| GKAP1   | G kinase anchoring protein 1 [Source:HGNC Symbol;Acc:HGNC:17496]                                          |
| IL2RB   | interleukin 2 receptor subunit beta [Source:HGNC Symbol;Acc:HGNC:6009]                                    |

|           |                                                                                                    |
|-----------|----------------------------------------------------------------------------------------------------|
| IL4R      | interleukin 4 receptor [Source:HGNC Symbol;Acc:HGNC:6015]                                          |
| ILKAP     | ILK associated serine/threonine phosphatase [Source:HGNC Symbol;Acc:HGNC:15566]                    |
| ING5      | inhibitor of growth family member 5 [Source:HGNC Symbol;Acc:HGNC:19421]                            |
| JAKMIP2   | janus kinase and microtubule interacting protein 2 [Source:HGNC Symbol;Acc:HGNC:29067]             |
| LDOC1     | leucine zipper, down-regulated in cancer 1 [Source:HGNC Symbol;Acc:HGNC:6548]                      |
| LURAP1    | leucine rich adaptor protein 1 [Source:HGNC Symbol;Acc:HGNC:32327]                                 |
| LYST      | lysosomal trafficking regulator [Source:HGNC Symbol;Acc:HGNC:1968]                                 |
| MAP3K10   | mitogen-activated protein kinase kinase kinase 10 [Source:HGNC Symbol;Acc:HGNC:6849]               |
| MAPK1IP1L | mitogen-activated protein kinase 1 interacting protein 1-like [Source:HGNC Symbol;Acc:HGNC:19840]  |
| MED7      | mediator complex subunit 7 [Source:HGNC Symbol;Acc:HGNC:2378]                                      |
| MIF4GD    | MIF4G domain containing [Source:HGNC Symbol;Acc:HGNC:24030]                                        |
| MKNK1     | MAP kinase interacting serine/threonine kinase 1 [Source:HGNC Symbol;Acc:HGNC:7110]                |
| MRFAP1L1  | Morf4 family associated protein 1 like 1 [Source:HGNC Symbol;Acc:HGNC:28796]                       |
| NF2       | neurofibromin 2 (merlin) [Source:HGNC Symbol;Acc:HGNC:7773]                                        |
| NMI       | N-myc and STAT interactor [Source:HGNC Symbol;Acc:HGNC:7854]                                       |
| NUP54     | nucleoporin 54 [Source:HGNC Symbol;Acc:HGNC:17359]                                                 |
| OSBPL5    | oxysterol binding protein like 5 [Source:HGNC Symbol;Acc:HGNC:16392]                               |
| P4HA3     | prolyl 4-hydroxylase subunit alpha 3 [Source:HGNC Symbol;Acc:HGNC:30135]                           |
| PEF1      | penta-EF-hand domain containing 1 [Source:HGNC Symbol;Acc:HGNC:30009]                              |
| PITX1     | paired like homeodomain 1 [Source:HGNC Symbol;Acc:HGNC:9004]                                       |
| POGZ      | pogo transposable element with ZNF domain [Source:HGNC Symbol;Acc:HGNC:18801]                      |
| PPP1R16A  | protein phosphatase 1 regulatory subunit 16A [Source:HGNC Symbol;Acc:HGNC:14941]                   |
| PPP1R7    | protein phosphatase 1 regulatory subunit 7 [Source:HGNC Symbol;Acc:HGNC:9295]                      |
| PTCD3     | pentatricopeptide repeat domain 3 [Source:HGNC Symbol;Acc:HGNC:24717]                              |
| RHOBTB3   | Rho related BTB domain containing 3 [Source:HGNC Symbol;Acc:HGNC:18757]                            |
| RSU1      | Ras suppressor protein 1 [Source:HGNC Symbol;Acc:HGNC:10464]                                       |
| SNX1      | sorting nexin 1 [Source:HGNC Symbol;Acc:HGNC:11172]                                                |
| SNX7      | sorting nexin 7 [Source:HGNC Symbol;Acc:HGNC:14971]                                                |
| STAM      | signal transducing adaptor molecule [Source:HGNC Symbol;Acc:HGNC:11357]                            |
| STAM2     | signal transducing adaptor molecule 2 [Source:HGNC Symbol;Acc:HGNC:11358]                          |
| STXBP1    | syntaxin binding protein 1 [Source:HGNC Symbol;Acc:HGNC:11444]                                     |
| SUN2      | Sad1 and UNC84 domain containing 2 [Source:HGNC Symbol;Acc:HGNC:14210]                             |
| TADA2A    | transcriptional adaptor 2A [Source:HGNC Symbol;Acc:HGNC:11531]                                     |
| TIMMDC1   | translocase of inner mitochondrial membrane domain containing 1 [Source:HGNC Symbol;Acc:HGNC:1321] |
| TMEM189   | transmembrane protein 189 [Source:HGNC Symbol;Acc:HGNC:16735]                                      |
| TOM1L1    | target of myb1 like 1 membrane trafficking protein [Source:HGNC Symbol;Acc:HGNC:11983]             |

|          |                                                                                                 |
|----------|-------------------------------------------------------------------------------------------------|
| UBA1     | ubiquitin like modifier activating enzyme 1 [Source:HGNC Symbol;Acc:HGNC:12469]                 |
| UBE4B    | ubiquitination factor E4B [Source:HGNC Symbol;Acc:HGNC:12500]                                   |
| USHBP1   | USH1 protein network component harmonin binding protein 1 [Source:HGNC Symbol;Acc:HGNC:24058]   |
| VPS37C   | VPS37C, ESCRT-I subunit [Source:HGNC Symbol;Acc:HGNC:26097]                                     |
| ZNF302   | zinc finger protein 302 [Source:HGNC Symbol;Acc:HGNC:13848]                                     |
| BTNL9    | butyrophilin like 9 [Source:HGNC Symbol;Acc:HGNC:24176]                                         |
| CCDC107  | coiled-coil domain containing 107 [Source:HGNC Symbol;Acc:HGNC:28465]                           |
| CCDC155  | coiled-coil domain containing 155 [Source:HGNC Symbol;Acc:HGNC:26520]                           |
| CLEC10A  | C-type lectin domain family 10 member A [Source:HGNC Symbol;Acc:HGNC:16916]                     |
| CLEC3B   | C-type lectin domain family 3 member B [Source:HGNC Symbol;Acc:HGNC:11891]                      |
| FNDCC9   | fibronectin type III domain containing 9 [Source:HGNC Symbol;Acc:HGNC:33547]                    |
| LYN      | LYN proto-oncogene, Src family tyrosine kinase [Source:HGNC Symbol;Acc:HGNC:6735]               |
| MRM3     | mitochondrial rRNA methyltransferase 3 [Source:HGNC Symbol;Acc:HGNC:18485]                      |
| PANX1    | pannexin 1 [Source:HGNC Symbol;Acc:HGNC:8599]                                                   |
| PLEKHO1  | pleckstrin homology domain containing O1 [Source:HGNC Symbol;Acc:HGNC:24310]                    |
| POU2F1   | POU class 2 homeobox 1 [Source:HGNC Symbol;Acc:HGNC:9212]                                       |
| RC3H1    | ring finger and CCCH-type domains 1 [Source:HGNC Symbol;Acc:HGNC:29434]                         |
| STX1A    | syntaxin 1A [Source:HGNC Symbol;Acc:HGNC:11433]                                                 |
| ZCCHC12  | zinc finger CCHC-type containing 12 [Source:HGNC Symbol;Acc:HGNC:27273]                         |
| PAAF1    | proteasomal ATPase associated factor 1 [Source:HGNC Symbol;Acc:HGNC:25687]                      |
| ZNF655   | zinc finger protein 655 [Source:HGNC Symbol;Acc:HGNC:30899]                                     |
| CSTB     | cystatin B [Source:HGNC Symbol;Acc:HGNC:2482]                                                   |
| RNF115   | ring finger protein 115 [Source:HGNC Symbol;Acc:HGNC:18154]                                     |
| ERCC5    | ERCC excision repair 5, endonuclease [Source:HGNC Symbol;Acc:HGNC:3437]                         |
| ERCC8    | ERCC excision repair 8, CSA ubiquitin ligase complex subunit [Source:HGNC Symbol;Acc:HGNC:3439] |
| RNF11    | ring finger protein 11 [Source:HGNC Symbol;Acc:HGNC:10056]                                      |
| RNF216   | ring finger protein 216 [Source:HGNC Symbol;Acc:HGNC:21698]                                     |
| TRIL     | TLR4 interactor with leucine rich repeats [Source:HGNC Symbol;Acc:HGNC:22200]                   |
| PAXIP1   | PAX interacting protein 1 [Source:HGNC Symbol;Acc:HGNC:8624]                                    |
| GPS2     | G protein pathway suppressor 2 [Source:HGNC Symbol;Acc:HGNC:4550]                               |
| MAP1LC3C | microtubule associated protein 1 light chain 3 gamma [Source:HGNC Symbol;Acc:HGNC:13353]        |
| UBAC1    | UBA domain containing 1 [Source:HGNC Symbol;Acc:HGNC:30221]                                     |
| UBE2W    | ubiquitin conjugating enzyme E2 W (putative) [Source:HGNC Symbol;Acc:HGNC:25616]                |
| TMED7    | transmembrane p24 trafficking protein 7 [Source:HGNC Symbol;Acc:HGNC:24253]                     |
| TOLLIP   | toll interacting protein [Source:HGNC Symbol;Acc:HGNC:16476]                                    |
| DAB1     | DAB1, reelin adaptor protein [Source:HGNC Symbol;Acc:HGNC:2661]                                 |
| SNX17    | sorting nexin 17 [Source:HGNC Symbol;Acc:HGNC:14979]                                            |
| ZSCAN12  | zinc finger and SCAN domain containing 12 [Source:HGNC Symbol;Acc:HGNC:13172]                   |

|          |                                                                                                      |
|----------|------------------------------------------------------------------------------------------------------|
| CYP4F12  | cytochrome P450 family 4 subfamily F member 12 [Source:HGNC Symbol;Acc:HGNC:18857]                   |
| NUP85    | nucleoporin 85 [Source:HGNC Symbol;Acc:HGNC:8734]                                                    |
| COL9A1   | collagen type IX alpha 1 [Source:HGNC Symbol;Acc:HGNC:2217]                                          |
| COL9A3   | collagen type IX alpha 3 [Source:HGNC Symbol;Acc:HGNC:2219]                                          |
| EIF3F    | eukaryotic translation initiation factor 3 subunit F [Source:HGNC Symbol;Acc:HGNC:3275]              |
| KCNIP4   | potassium voltage-gated channel interacting protein 4 [Source:HGNC Symbol;Acc:HGNC:30083]            |
| LIG4     | DNA ligase 4 [Source:HGNC Symbol;Acc:HGNC:6601]                                                      |
| ATP5H    | ATP synthase, H+ transporting, mitochondrial Fo complex subunit D [Source:HGNC Symbol;Acc:HGNC:845]  |
| ATP6V0C  | ATPase H+ transporting V0 subunit c [Source:HGNC Symbol;Acc:HGNC:855]                                |
| ATP6V0E1 | ATPase H+ transporting V0 subunit e1 [Source:HGNC Symbol;Acc:HGNC:863]                               |
| ATP6V1B2 | ATPase H+ transporting V1 subunit B2 [Source:HGNC Symbol;Acc:HGNC:854]                               |
| DDB1     | damage specific DNA binding protein 1 [Source:HGNC Symbol;Acc:HGNC:2717]                             |
| PRDX5    | peroxiredoxin 5 [Source:HGNC Symbol;Acc:HGNC:9355]                                                   |
| CTSC     | cathepsin C [Source:HGNC Symbol;Acc:HGNC:2528]                                                       |
| ATP5F1   | ATP synthase, H+ transporting, mitochondrial Fo complex subunit B1 [Source:HGNC Symbol;Acc:HGNC:840] |
| ATP5J    | ATP synthase, H+ transporting, mitochondrial Fo complex subunit F6 [Source:HGNC Symbol;Acc:HGNC:847] |
| ATP6AP1  | ATPase H+ transporting accessory protein 1 [Source:HGNC Symbol;Acc:HGNC:868]                         |
| ATP6V0A1 | ATPase H+ transporting V0 subunit a1 [Source:HGNC Symbol;Acc:HGNC:865]                               |
| ATP6V1E1 | ATPase H+ transporting V1 subunit E1 [Source:HGNC Symbol;Acc:HGNC:857]                               |
| COX14    | COX14 cytochrome c oxidase assembly factor [Source:HGNC Symbol;Acc:HGNC:28216]                       |
| COX7A2L  | cytochrome c oxidase subunit 7A2 like [Source:HGNC Symbol;Acc:HGNC:2289]                             |
| FBXO7    | F-box protein 7 [Source:HGNC Symbol;Acc:HGNC:13586]                                                  |
| GPI      | glucose-6-phosphate isomerase [Source:HGNC Symbol;Acc:HGNC:4458]                                     |
| PFKL     | phosphofructokinase, liver type [Source:HGNC Symbol;Acc:HGNC:8876]                                   |
| RHOT2    | ras homolog family member T2 [Source:HGNC Symbol;Acc:HGNC:21169]                                     |
| SCARB2   | scavenger receptor class B member 2 [Source:HGNC Symbol;Acc:HGNC:1665]                               |
| UQCC2    | ubiquinol-cytochrome c reductase complex assembly factor 2 [Source:HGNC Symbol;Acc:HGNC:21237]       |
| XRCC6    | X-ray repair cross complementing 6 [Source:HGNC Symbol;Acc:HGNC:4055]                                |
| ATP6V0E2 | ATPase H+ transporting V0 subunit e2 [Source:HGNC Symbol;Acc:HGNC:21723]                             |
| ATP6V1G1 | ATPase H+ transporting V1 subunit G1 [Source:HGNC Symbol;Acc:HGNC:864]                               |
| CTSF     | cathepsin F [Source:HGNC Symbol;Acc:HGNC:2531]                                                       |
| LAMB1    | laminin subunit beta 1 [Source:HGNC Symbol;Acc:HGNC:6486]                                            |
| PRELP    | proline and arginine rich end leucine rich repeat protein [Source:HGNC Symbol;Acc:HGNC:9357]         |
| TRAK1    | trafficking kinesin protein 1 [Source:HGNC Symbol;Acc:HGNC:29947]                                    |
| ULK3     | unc-51 like kinase 3 [Source:HGNC Symbol;Acc:HGNC:19703]                                             |

|          |                                                                                                        |
|----------|--------------------------------------------------------------------------------------------------------|
| ARF3     | ADP ribosylation factor 3 [Source:HGNC Symbol;Acc:HGNC:654]                                            |
| ATP6V1A  | ATPase H+ transporting V1 subunit A [Source:HGNC Symbol;Acc:HGNC:851]                                  |
| BAG5     | BCL2 associated athanogene 5 [Source:HGNC Symbol;Acc:HGNC:941]                                         |
| CTSA     | cathepsin A [Source:HGNC Symbol;Acc:HGNC:9251]                                                         |
| IFNGR1   | interferon gamma receptor 1 [Source:HGNC Symbol;Acc:HGNC:5439]                                         |
| LAMB2    | laminin subunit beta 2 [Source:HGNC Symbol;Acc:HGNC:6487]                                              |
| MPC1     | mitochondrial pyruvate carrier 1 [Source:HGNC Symbol;Acc:HGNC:21606]                                   |
| OGN      | osteoglycin [Source:HGNC Symbol;Acc:HGNC:8126]                                                         |
| P2RX5    | purinergic receptor P2X 5 [Source:HGNC Symbol;Acc:HGNC:8536]                                           |
| PIN1     | peptidylprolyl cis/trans isomerase, NIMA-interacting 1 [Source:HGNC Symbol;Acc:HGNC:8988]              |
| SEC13    | SEC13 homolog, nuclear pore and COPII coat complex component [Source:HGNC Symbol;Acc:HGNC:10697]       |
| UQCRCF1  | ubiquinol-cytochrome c reductase, Rieske iron-sulfur polypeptide 1 [Source:HGNC Symbol;Acc:HGNC:12587] |
| UQCRCQ   | ubiquinol-cytochrome c reductase complex III subunit VII [Source:HGNC Symbol;Acc:HGNC:29594]           |
| SCO2     | SCO2 cytochrome c oxidase assembly protein [Source:HGNC Symbol;Acc:HGNC:10604]                         |
| VPS26A   | VPS26, retromer complex component A [Source:HGNC Symbol;Acc:HGNC:12711]                                |
| UQCC1    | ubiquinol-cytochrome c reductase complex assembly factor 1 [Source:HGNC Symbol;Acc:HGNC:15891]         |
| ITGA8    | integrin subunit alpha 8 [Source:HGNC Symbol;Acc:HGNC:6144]                                            |
| ATP6V1C1 | ATPase H+ transporting V1 subunit C1 [Source:HGNC Symbol;Acc:HGNC:856]                                 |
| ACP2     | acid phosphatase 2, lysosomal [Source:HGNC Symbol;Acc:HGNC:123]                                        |
| AKAP1    | A-kinase anchoring protein 1 [Source:HGNC Symbol;Acc:HGNC:367]                                         |
| APOL1    | apolipoprotein L1 [Source:HGNC Symbol;Acc:HGNC:618]                                                    |
| ARF6     | ADP ribosylation factor 6 [Source:HGNC Symbol;Acc:HGNC:659]                                            |
| ATP5SL   | ATP5S like [Source:HGNC Symbol;Acc:HGNC:25496]                                                         |
| ATP6V1D  | ATPase H+ transporting V1 subunit D [Source:HGNC Symbol;Acc:HGNC:13527]                                |
| ATP6V1H  | ATPase H+ transporting V1 subunit H [Source:HGNC Symbol;Acc:HGNC:18303]                                |
| CAPN1    | calpain 1 [Source:HGNC Symbol;Acc:HGNC:1476]                                                           |
| CLPP     | caseinolytic mitochondrial matrix peptidase proteolytic subunit [Source:HGNC Symbol;Acc:HGNC:2084]     |
| COA1     | cytochrome c oxidase assembly factor 1 homolog [Source:HGNC Symbol;Acc:HGNC:21868]                     |
| COA3     | cytochrome c oxidase assembly factor 3 [Source:HGNC Symbol;Acc:HGNC:24990]                             |
| COA4     | cytochrome c oxidase assembly factor 4 homolog [Source:HGNC Symbol;Acc:HGNC:24604]                     |
| COA5     | cytochrome c oxidase assembly factor 5 [Source:HGNC Symbol;Acc:HGNC:33848]                             |
| COA6     | cytochrome c oxidase assembly factor 6 [Source:HGNC Symbol;Acc:HGNC:18025]                             |
| COL5A3   | collagen type V alpha 3 [Source:HGNC Symbol;Acc:HGNC:14864]                                            |
| COX16    | COX16 cytochrome c oxidase assembly homolog [Source:HGNC Symbol;Acc:HGNC:20213]                        |



|          |                                                                                             |
|----------|---------------------------------------------------------------------------------------------|
| CUL1     | cullin 1 [Source:HGNC Symbol;Acc:HGNC:2551]                                                 |
| CUL4A    | cullin 4A [Source:HGNC Symbol;Acc:HGNC:2554]                                                |
| DBNL     | drebrin like [Source:HGNC Symbol;Acc:HGNC:2696]                                             |
| EMILIN1  | elastin microfibril interfacier 1 [Source:HGNC Symbol;Acc:HGNC:19880]                       |
| FABP12   | fatty acid binding protein 12 [Source:HGNC Symbol;Acc:HGNC:34524]                           |
| FH       | fumarate hydratase [Source:HGNC Symbol;Acc:HGNC:3700]                                       |
| HKDC1    | hexokinase domain containing 1 [Source:HGNC Symbol;Acc:HGNC:23302]                          |
| IDH3G    | isocitrate dehydrogenase 3 (NAD(+)) gamma [Source:HGNC Symbol;Acc:HGNC:5386]                |
| KAT2A    | lysine acetyltransferase 2A [Source:HGNC Symbol;Acc:HGNC:4201]                              |
| KIF5B    | kinesin family member 5B [Source:HGNC Symbol;Acc:HGNC:6324]                                 |
| LAMA2    | laminin subunit alpha 2 [Source:HGNC Symbol;Acc:HGNC:6482]                                  |
| MAPK8IP3 | mitogen-activated protein kinase 8 interacting protein 3 [Source:HGNC Symbol;Acc:HGNC:6884] |
| MCUR1    | mitochondrial calcium uniporter regulator 1 [Source:HGNC Symbol;Acc:HGNC:21097]             |
| MEF2D    | myocyte enhancer factor 2D [Source:HGNC Symbol;Acc:HGNC:6997]                               |
| MLST8    | MTOR associated protein, LST8 homolog [Source:HGNC Symbol;Acc:HGNC:24825]                   |
| MPI      | mannose phosphate isomerase [Source:HGNC Symbol;Acc:HGNC:7216]                              |
| NDUFA10  | NADH:ubiquinone oxidoreductase subunit A10 [Source:HGNC Symbol;Acc:HGNC:7684]               |
| NDUFA9   | NADH:ubiquinone oxidoreductase subunit A9 [Source:HGNC Symbol;Acc:HGNC:7693]                |
| NMT1     | N-myristoyltransferase 1 [Source:HGNC Symbol;Acc:HGNC:7857]                                 |
| NR1H2    | nuclear receptor subfamily 1 group H member 2 [Source:HGNC Symbol;Acc:HGNC:7965]            |
| PARL     | presenilin associated rhomboid like [Source:HGNC Symbol;Acc:HGNC:18253]                     |
| PDGFD    | platelet derived growth factor D [Source:HGNC Symbol;Acc:HGNC:30620]                        |
| PK2      | pyruvate dehydrogenase kinase 2 [Source:HGNC Symbol;Acc:HGNC:8810]                          |
| PIP4K2A  | phosphatidylinositol-5-phosphate 4-kinase type 2 alpha [Source:HGNC Symbol;Acc:HGNC:8997]   |
| PIP4K2B  | phosphatidylinositol-5-phosphate 4-kinase type 2 beta [Source:HGNC Symbol;Acc:HGNC:8998]    |
| PIP5K1A  | phosphatidylinositol-4-phosphate 5-kinase type 1 alpha [Source:HGNC Symbol;Acc:HGNC:8994]   |
| PIP5K1C  | phosphatidylinositol-4-phosphate 5-kinase type 1 gamma [Source:HGNC Symbol;Acc:HGNC:8996]   |
| PPP5C    | protein phosphatase 5 catalytic subunit [Source:HGNC Symbol;Acc:HGNC:9322]                  |
| PUM1     | pumilio RNA binding family member 1 [Source:HGNC Symbol;Acc:HGNC:14957]                     |
| RCC2     | regulator of chromosome condensation 2 [Source:HGNC Symbol;Acc:HGNC:30297]                  |
| RDX      | radixin [Source:HGNC Symbol;Acc:HGNC:9944]                                                  |
| RXRG     | retinoid X receptor gamma [Source:HGNC Symbol;Acc:HGNC:10479]                               |
| S100A12  | S100 calcium binding protein A12 [Source:HGNC Symbol;Acc:HGNC:10489]                        |
| SLC25A1  | solute carrier family 25 member 1 [Source:HGNC Symbol;Acc:HGNC:10979]                       |
| SLC25A12 | solute carrier family 25 member 12 [Source:HGNC Symbol;Acc:HGNC:10982]                      |
| SLC25A23 | solute carrier family 25 member 23 [Source:HGNC Symbol;Acc:HGNC:19375]                      |

|          |                                                                                                                  |
|----------|------------------------------------------------------------------------------------------------------------------|
| TIMM17B  | translocase of inner mitochondrial membrane 17 homolog B (yeast) [Source:HGNC Symbol;Acc:HGNC:17310]             |
| TPPP     | tubulin polymerization promoting protein [Source:HGNC Symbol;Acc:HGNC:24164]                                     |
| VPS11    | VPS11, CORVET/HOPS core subunit [Source:HGNC Symbol;Acc:HGNC:14583]                                              |
| VPS26B   | VPS26, retromer complex component B [Source:HGNC Symbol;Acc:HGNC:28119]                                          |
| YME1L1   | YME1 like 1 ATPase [Source:HGNC Symbol;Acc:HGNC:12843]                                                           |
| YY1      | YY1 transcription factor [Source:HGNC Symbol;Acc:HGNC:12856]                                                     |
| IRF5     | interferon regulatory factor 5 [Source:HGNC Symbol;Acc:HGNC:6120]                                                |
| NFKBIE   | NFKB inhibitor epsilon [Source:HGNC Symbol;Acc:HGNC:7799]                                                        |
| ACP7     | acid phosphatase 7, tartrate resistant (putative) [Source:HGNC Symbol;Acc:HGNC:33781]                            |
| NXPH1    | neurexophilin 1 [Source:HGNC Symbol;Acc:HGNC:20693]                                                              |
| HEXA     | hexosaminidase subunit alpha [Source:HGNC Symbol;Acc:HGNC:4878]                                                  |
| APOF     | apolipoprotein F [Source:HGNC Symbol;Acc:HGNC:615]                                                               |
| ATG10    | autophagy related 10 [Source:HGNC Symbol;Acc:HGNC:20315]                                                         |
| ATP5L2   | ATP synthase, H+ transporting, mitochondrial Fo complex subunit G2 [Source:HGNC Symbol;Acc:HGNC:13213]           |
| ATP5S    | ATP synthase, H+ transporting, mitochondrial Fo complex subunit s (factor B) [Source:HGNC Symbol;Acc:HGNC:18799] |
| ATP6AP1L | ATPase H+ transporting accessory protein 1 like [Source:HGNC Symbol;Acc:HGNC:28091]                              |
| ATP6V0A2 | ATPase H+ transporting V0 subunit a2 [Source:HGNC Symbol;Acc:HGNC:18481]                                         |
| ATP6V0A4 | ATPase H+ transporting V0 subunit a4 [Source:HGNC Symbol;Acc:HGNC:866]                                           |
| ATP6V0D2 | ATPase H+ transporting V0 subunit d2 [Source:HGNC Symbol;Acc:HGNC:18266]                                         |
| ATP6V1E2 | ATPase H+ transporting V1 subunit E2 [Source:HGNC Symbol;Acc:HGNC:18125]                                         |
| ATP6V1G3 | ATPase H+ transporting V1 subunit G3 [Source:HGNC Symbol;Acc:HGNC:18265]                                         |
| C1orf56  | chromosome 1 open reading frame 56 [Source:HGNC Symbol;Acc:HGNC:26045]                                           |
| C6       | complement component 6 [Source:HGNC Symbol;Acc:HGNC:1339]                                                        |
| C8A      | complement component 8 alpha subunit [Source:HGNC Symbol;Acc:HGNC:1352]                                          |
| CAMKK2   | calcium/calmodulin dependent protein kinase kinase 2 [Source:HGNC Symbol;Acc:HGNC:1470]                          |
| CLPB     | ClpB homolog, mitochondrial AAA ATPase chaperonin [Source:HGNC Symbol;Acc:HGNC:30664]                            |
| COA7     | cytochrome c oxidase assembly factor 7 (putative) [Source:HGNC Symbol;Acc:HGNC:25716]                            |
| COL6A5   | collagen type VI alpha 5 [Source:HGNC Symbol;Acc:HGNC:26674]                                                     |
| COL6A6   | collagen type VI alpha 6 [Source:HGNC Symbol;Acc:HGNC:27023]                                                     |
| COX18    | COX18 cytochrome c oxidase assembly factor [Source:HGNC Symbol;Acc:HGNC:26801]                                   |
| COX19    | COX19 cytochrome c oxidase assembly factor [Source:HGNC Symbol;Acc:HGNC:28074]                                   |
| COX20    | COX20 cytochrome c oxidase assembly factor [Source:HGNC Symbol;Acc:HGNC:26970]                                   |
| COX6A2   | cytochrome c oxidase subunit 6A2 [Source:HGNC Symbol;Acc:HGNC:2279]                                              |
| COX7B2   | cytochrome c oxidase subunit 7B2 [Source:HGNC Symbol;Acc:HGNC:24381]                                             |
| COX8C    | cytochrome c oxidase subunit 8C [Source:HGNC Symbol;Acc:HGNC:24382]                                              |

|         |                                                                                                                      |
|---------|----------------------------------------------------------------------------------------------------------------------|
| DEPDC5  | DEP domain containing 5 [Source:HGNC Symbol;Acc:HGNC:18423]                                                          |
| DIS3L2  | DIS3 like 3'-5' exoribonuclease 2 [Source:HGNC Symbol;Acc:HGNC:28648]                                                |
| DUOX2   | dual oxidase 2 [Source:HGNC Symbol;Acc:HGNC:13273]                                                                   |
| FABP9   | fatty acid binding protein 9 [Source:HGNC Symbol;Acc:HGNC:3563]                                                      |
| FCAR    | Fc fragment of IgA receptor [Source:HGNC Symbol;Acc:HGNC:3608]                                                       |
| FCER2   | Fc fragment of IgE receptor II [Source:HGNC Symbol;Acc:HGNC:3612]                                                    |
| FCGR1B  | Fc fragment of IgG receptor Ib [Source:HGNC Symbol;Acc:HGNC:3614]                                                    |
| GAS2    | growth arrest specific 2 [Source:HGNC Symbol;Acc:HGNC:4167]                                                          |
| GPIHBP1 | glycosylphosphatidylinositol anchored high density lipoprotein binding protein 1 [Source:HGNC Symbol;Acc:HGNC:24945] |
| HAPLN1  | hyaluronan and proteoglycan link protein 1 [Source:HGNC Symbol;Acc:HGNC:2380]                                        |
| INHA    | inhibin alpha subunit [Source:HGNC Symbol;Acc:HGNC:6065]                                                             |
| INSRR   | insulin receptor related receptor [Source:HGNC Symbol;Acc:HGNC:6093]                                                 |
| ITGA11  | integrin subunit alpha 11 [Source:HGNC Symbol;Acc:HGNC:6136]                                                         |
| ITGA4   | integrin subunit alpha 4 [Source:HGNC Symbol;Acc:HGNC:6140]                                                          |
| ITGA9   | integrin subunit alpha 9 [Source:HGNC Symbol;Acc:HGNC:6145]                                                          |
| LAMB4   | laminin subunit beta 4 [Source:HGNC Symbol;Acc:HGNC:6491]                                                            |
| LDHAL6A | lactate dehydrogenase A like 6A [Source:HGNC Symbol;Acc:HGNC:28335]                                                  |
| LDHAL6B | lactate dehydrogenase A like 6B [Source:HGNC Symbol;Acc:HGNC:21481]                                                  |
| LNPEP   | leucyl/cystinyl aminopeptidase [Source:HGNC Symbol;Acc:HGNC:6656]                                                    |
| MAS1    | MAS1 proto-oncogene, G protein-coupled receptor [Source:HGNC Symbol;Acc:HGNC:6899]                                   |
| MMP24   | matrix metalloproteinase 24 [Source:HGNC Symbol;Acc:HGNC:7172]                                                       |
| MMP25   | matrix metalloproteinase 25 [Source:HGNC Symbol;Acc:HGNC:14246]                                                      |
| MPC1L   | mitochondrial pyruvate carrier 1-like [Source:HGNC Symbol;Acc:HGNC:44205]                                            |
| MT-CO1  | mitochondrially encoded cytochrome c oxidase I [Source:HGNC Symbol;Acc:HGNC:7419]                                    |
| MT-CO2  | mitochondrially encoded cytochrome c oxidase II [Source:HGNC Symbol;Acc:HGNC:7421]                                   |
| MT-ND1  | mitochondrially encoded NADH:ubiquinone oxidoreductase core subunit 1 [Source:HGNC Symbol;Acc:HGNC:7455]             |
| MT-ND3  | mitochondrially encoded NADH:ubiquinone oxidoreductase core subunit 3 [Source:HGNC Symbol;Acc:HGNC:7458]             |
| MT-ND4L | mitochondrially encoded NADH:ubiquinone oxidoreductase core subunit 4L [Source:HGNC Symbol;Acc:HGNC:7460]            |
| MT-ND5  | mitochondrially encoded NADH:ubiquinone oxidoreductase core subunit 5 [Source:HGNC Symbol;Acc:HGNC:7461]             |
| MT-ND6  | mitochondrially encoded NADH:ubiquinone oxidoreductase core subunit 6 [Source:HGNC Symbol;Acc:HGNC:7462]             |
| NEK1    | NIMA related kinase 1 [Source:HGNC Symbol;Acc:HGNC:7744]                                                             |
| NFKBID  | NF-kappa-B inhibitor delta [Source:HGNC Symbol;Acc:HGNC:15671]                                                       |
| NOX5    | NADPH oxidase, EF-hand calcium binding domain 5 [Source:HGNC Symbol;Acc:HGNC:14874]                                  |
| P2RX1   | purinergic receptor P2X 1 [Source:HGNC Symbol;Acc:HGNC:8533]                                                         |

|         |                                                                                                 |
|---------|-------------------------------------------------------------------------------------------------|
| P2RX2   | purinergic receptor P2X 2 [Source:HGNC Symbol;Acc:HGNC:15459]                                   |
| P2RX3   | purinergic receptor P2X 3 [Source:HGNC Symbol;Acc:HGNC:8534]                                    |
| P2RX6   | purinergic receptor P2X 6 [Source:HGNC Symbol;Acc:HGNC:8538]                                    |
| P2RY1   | purinergic receptor P2Y1 [Source:HGNC Symbol;Acc:HGNC:8539]                                     |
| P2RY10  | purinergic receptor P2Y10 [Source:HGNC Symbol;Acc:HGNC:19906]                                   |
| P2RY13  | purinergic receptor P2Y13 [Source:HGNC Symbol;Acc:HGNC:4537]                                    |
| P2RY2   | purinergic receptor P2Y2 [Source:HGNC Symbol;Acc:HGNC:8541]                                     |
| P2RY6   | pyrimidinergic receptor P2Y6 [Source:HGNC Symbol;Acc:HGNC:8543]                                 |
| PDHA2   | pyruvate dehydrogenase (lipoamide) alpha 2 [Source:HGNC Symbol;Acc:HGNC:8807]                   |
| PKD3    | pyruvate dehydrogenase kinase 3 [Source:HGNC Symbol;Acc:HGNC:8811]                              |
| PDP2    | pyruvate dehydrogenase phosphatase catalytic subunit 2 [Source:HGNC Symbol;Acc:HGNC:30263]      |
| PF4V1   | platelet factor 4 variant 1 [Source:HGNC Symbol;Acc:HGNC:8862]                                  |
| PGAM4   | phosphoglycerate mutase family member 4 [Source:HGNC Symbol;Acc:HGNC:21731]                     |
| PKLR    | pyruvate kinase, liver and RBC [Source:HGNC Symbol;Acc:HGNC:9020]                               |
| PPP3R2  | protein phosphatase 3 regulatory subunit B, beta [Source:HGNC Symbol;Acc:HGNC:9318]             |
| PRKACG  | protein kinase cAMP-activated catalytic subunit gamma [Source:HGNC Symbol;Acc:HGNC:9382]        |
| PRKAR1B | protein kinase cAMP-dependent type I regulatory subunit beta [Source:HGNC Symbol;Acc:HGNC:9390] |
| PSG11   | pregnancy specific beta-1-glycoprotein 11 [Source:HGNC Symbol;Acc:HGNC:9516]                    |
| PSG9    | pregnancy specific beta-1-glycoprotein 9 [Source:HGNC Symbol;Acc:HGNC:9526]                     |
| SFN     | stratifin [Source:HGNC Symbol;Acc:HGNC:10773]                                                   |
| SLC25A6 | solute carrier family 25 member 6 [Source:HGNC Symbol;Acc:HGNC:10992]                           |
| SLC38A9 | solute carrier family 38 member 9 [Source:HGNC Symbol;Acc:HGNC:26907]                           |
| STAC    | SH3 and cysteine rich domain [Source:HGNC Symbol;Acc:HGNC:11353]                                |
| STAC3   | SH3 and cysteine rich domain 3 [Source:HGNC Symbol;Acc:HGNC:28423]                              |
| TNN     | tenascin N [Source:HGNC Symbol;Acc:HGNC:22942]                                                  |
| TNR     | tenascin R [Source:HGNC Symbol;Acc:HGNC:11953]                                                  |
| ULK4    | unc-51 like kinase 4 [Source:HGNC Symbol;Acc:HGNC:15784]                                        |
| UQCRHL  | ubiquinol-cytochrome c reductase hinge protein like [Source:HGNC Symbol;Acc:HGNC:51714]         |
| WDR24   | WD repeat domain 24 [Source:HGNC Symbol;Acc:HGNC:20852]                                         |
| PGM1    | phosphoglucomutase 1 [Source:HGNC Symbol;Acc:HGNC:8905]                                         |
| NFKBIL1 | NFKB inhibitor like 1 [Source:HGNC Symbol;Acc:HGNC:7800]                                        |
| SDHAF4  | succinate dehydrogenase complex assembly factor 4 [Source:HGNC Symbol;Acc:HGNC:20957]           |
| NPRL2   | NPR2-like, GATOR1 complex subunit [Source:HGNC Symbol;Acc:HGNC:24969]                           |
| MAPK10  | mitogen-activated protein kinase 10 [Source:HGNC Symbol;Acc:HGNC:6872]                          |
| SDHAF3  | succinate dehydrogenase complex assembly factor 3 [Source:HGNC Symbol;Acc:HGNC:21752]           |

|          |                                                                                                              |
|----------|--------------------------------------------------------------------------------------------------------------|
| PHLPP1   | PH domain and leucine rich repeat protein phosphatase 1 [Source:HGNC Symbol;Acc:HGNC:20610]                  |
| PLXNA1   | plexin A1 [Source:HGNC Symbol;Acc:HGNC:9099]                                                                 |
| ATG16L1  | autophagy related 16 like 1 [Source:HGNC Symbol;Acc:HGNC:21498]                                              |
| BCAN     | brevican [Source:HGNC Symbol;Acc:HGNC:23059]                                                                 |
| BPGM     | bisphosphoglycerate mutase [Source:HGNC Symbol;Acc:HGNC:1093]                                                |
| C7       | complement component 7 [Source:HGNC Symbol;Acc:HGNC:1346]                                                    |
| CHCHD4   | coiled-coil-helix-coiled-coil-helix domain containing 4 [Source:HGNC Symbol;Acc:HGNC:26467]                  |
| CSPG4    | chondroitin sulfate proteoglycan 4 [Source:HGNC Symbol;Acc:HGNC:2466]                                        |
| DIS3L    | DIS3 like exosome 3'-5' exoribonuclease [Source:HGNC Symbol;Acc:HGNC:28698]                                  |
| EXOSC3   | exosome component 3 [Source:HGNC Symbol;Acc:HGNC:17944]                                                      |
| EXOSC8   | exosome component 8 [Source:HGNC Symbol;Acc:HGNC:17035]                                                      |
| EXOSC9   | exosome component 9 [Source:HGNC Symbol;Acc:HGNC:9137]                                                       |
| FCGBP    | Fc fragment of IgG binding protein [Source:HGNC Symbol;Acc:HGNC:13572]                                       |
| GALM     | galactose mutarotase [Source:HGNC Symbol;Acc:HGNC:24063]                                                     |
| HAPLN4   | hyaluronan and proteoglycan link protein 4 [Source:HGNC Symbol;Acc:HGNC:31357]                               |
| IRF2     | interferon regulatory factor 2 [Source:HGNC Symbol;Acc:HGNC:6117]                                            |
| ITGA10   | integrin subunit alpha 10 [Source:HGNC Symbol;Acc:HGNC:6135]                                                 |
| KCNJ8    | potassium voltage-gated channel subfamily J member 8 [Source:HGNC Symbol;Acc:HGNC:6269]                      |
| LDHD     | lactate dehydrogenase D [Source:HGNC Symbol;Acc:HGNC:19708]                                                  |
| MAP2K4   | mitogen-activated protein kinase kinase 4 [Source:HGNC Symbol;Acc:HGNC:6844]                                 |
| MAP2K7   | mitogen-activated protein kinase kinase 7 [Source:HGNC Symbol;Acc:HGNC:6847]                                 |
| 5-Mar    | membrane associated ring-CH-type finger 5 [Source:HGNC Symbol;Acc:HGNC:26025]                                |
| MIOS     | meiosis regulator for oocyte development [Source:HGNC Symbol;Acc:HGNC:21905]                                 |
| MMP15    | matrix metalloproteinase 15 [Source:HGNC Symbol;Acc:HGNC:7161]                                               |
| MMP19    | matrix metalloproteinase 19 [Source:HGNC Symbol;Acc:HGNC:7165]                                               |
| MSRB1    | methionine sulfoxide reductase B1 [Source:HGNC Symbol;Acc:HGNC:14133]                                        |
| NCF4     | neutrophil cytosolic factor 4 [Source:HGNC Symbol;Acc:HGNC:7662]                                             |
| NFATC2IP | nuclear factor of activated T-cells 2 interacting protein [Source:HGNC Symbol;Acc:HGNC:25906]                |
| NFATC3   | nuclear factor of activated T-cells 3 [Source:HGNC Symbol;Acc:HGNC:7777]                                     |
| NNT      | nicotinamide nucleotide transhydrogenase [Source:HGNC Symbol;Acc:HGNC:7863]                                  |
| OMA1     | OMA1 zinc metalloproteinase [Source:HGNC Symbol;Acc:HGNC:29661]                                              |
| P2RY11   | purinergic receptor P2Y11 [Source:HGNC Symbol;Acc:HGNC:8540]                                                 |
| P2RY14   | purinergic receptor P2Y14 [Source:HGNC Symbol;Acc:HGNC:16442]                                                |
| PDP1     | pyruvate dehydrogenase phosphatase catalytic subunit 1 [Source:HGNC Symbol;Acc:HGNC:9279]                    |
| PDPR     | pyruvate dehydrogenase phosphatase regulatory subunit [Source:HGNC Symbol;Acc:HGNC:30264]                    |
| PGAM5    | PGAM family member 5, mitochondrial serine/threonine protein phosphatase [Source:HGNC Symbol;Acc:HGNC:28763] |

|          |                                                                                                                         |
|----------|-------------------------------------------------------------------------------------------------------------------------|
| POLRMT   | polymerase (RNA) mitochondrial [Source:HGNC Symbol;Acc:HGNC:9200]                                                       |
| PPP3CA   | protein phosphatase 3 catalytic subunit alpha [Source:HGNC Symbol;Acc:HGNC:9314]                                        |
| RCC1     | regulator of chromosome condensation 1 [Source:HGNC Symbol;Acc:HGNC:1913]                                               |
| RCC1L    | RCC1 like [Source:HGNC Symbol;Acc:HGNC:14948]                                                                           |
| SDHAF1   | succinate dehydrogenase complex assembly factor 1 [Source:HGNC Symbol;Acc:HGNC:33867]                                   |
| SEH1L    | SEH1 like nucleoporin [Source:HGNC Symbol;Acc:HGNC:30379]                                                               |
| SENP2    | SUMO1/sentrin/SMT3 specific peptidase 2 [Source:HGNC Symbol;Acc:HGNC:23116]                                             |
| SENP5    | SUMO1/sentrin specific peptidase 5 [Source:HGNC Symbol;Acc:HGNC:28407]                                                  |
| SLC25A14 | solute carrier family 25 member 14 [Source:HGNC Symbol;Acc:HGNC:10984]                                                  |
| SLC25A27 | solute carrier family 25 member 27 [Source:HGNC Symbol;Acc:HGNC:21065]                                                  |
| SLC8B1   | solute carrier family 8 member B1 [Source:HGNC Symbol;Acc:HGNC:26175]                                                   |
| SURF2    | surfeit 2 [Source:HGNC Symbol;Acc:HGNC:11475]                                                                           |
| TXNRD2   | thioredoxin reductase 2 [Source:HGNC Symbol;Acc:HGNC:18155]                                                             |
| ULK2     | unc-51 like autophagy activating kinase 2 [Source:HGNC Symbol;Acc:HGNC:13480]                                           |
| UQCC3    | ubiquinol-cytochrome c reductase complex assembly factor 3 [Source:HGNC Symbol;Acc:HGNC:34399]                          |
| VPS13C   | vacuolar protein sorting 13 homolog C [Source:HGNC Symbol;Acc:HGNC:23594]                                               |
| VPS18    | VPS18, CORVET/HOPS core subunit [Source:HGNC Symbol;Acc:HGNC:15972]                                                     |
| WDR59    | WD repeat domain 59 [Source:HGNC Symbol;Acc:HGNC:25706]                                                                 |
| ADD1     | adducin 1 [Source:HGNC Symbol;Acc:HGNC:243]                                                                             |
| ATP5B    | ATP synthase, H <sup>+</sup> transporting, mitochondrial F1 complex, beta polypeptide [Source:HGNC Symbol;Acc:HGNC:830] |
| ATP5I    | ATP synthase, H <sup>+</sup> transporting, mitochondrial Fo complex subunit E [Source:HGNC Symbol;Acc:HGNC:846]         |
| COX7C    | cytochrome c oxidase subunit 7C [Source:HGNC Symbol;Acc:HGNC:2292]                                                      |
| SAA4     | serum amyloid A4, constitutive [Source:HGNC Symbol;Acc:HGNC:10516]                                                      |

| <b>Supplementary Table S3: the third list of genes involved in the anti-VEGF resistance related network (AV-DRN).</b> |                                                                                      |
|-----------------------------------------------------------------------------------------------------------------------|--------------------------------------------------------------------------------------|
| GJA1                                                                                                                  | gap junction protein alpha 1 [Source:HGNC Symbol;Acc:HGNC:4274]                      |
| GJD2                                                                                                                  | gap junction protein delta 2 [Source:HGNC Symbol;Acc:HGNC:19154]                     |
| LPAR1                                                                                                                 | lysophosphatidic acid receptor 1 [Source:HGNC Symbol;Acc:HGNC:3166]                  |
| GNAI1                                                                                                                 | G protein subunit alpha i1 [Source:HGNC Symbol;Acc:HGNC:4384]                        |
| GNAI3                                                                                                                 | G protein subunit alpha i3 [Source:HGNC Symbol;Acc:HGNC:4387]                        |
| GNAI2                                                                                                                 | G protein subunit alpha i2 [Source:HGNC Symbol;Acc:HGNC:4385]                        |
| PDGFA                                                                                                                 | platelet derived growth factor subunit A [Source:HGNC Symbol;Acc:HGNC:8799]          |
| PDGFB                                                                                                                 | platelet derived growth factor subunit B [Source:HGNC Symbol;Acc:HGNC:8800]          |
| PDGFC                                                                                                                 | platelet derived growth factor C [Source:HGNC Symbol;Acc:HGNC:8801]                  |
| PDGFD                                                                                                                 | platelet derived growth factor D [Source:HGNC Symbol;Acc:HGNC:30620]                 |
| EGF                                                                                                                   | epidermal growth factor [Source:HGNC Symbol;Acc:HGNC:3229]                           |
| PDGFRA                                                                                                                | platelet derived growth factor receptor alpha [Source:HGNC Symbol;Acc:HGNC:8803]     |
| PDGFRB                                                                                                                | platelet derived growth factor receptor beta [Source:HGNC Symbol;Acc:HGNC:8804]      |
| EGFR                                                                                                                  | epidermal growth factor receptor [Source:HGNC Symbol;Acc:HGNC:3236]                  |
| GRB2                                                                                                                  | growth factor receptor bound protein 2 [Source:HGNC Symbol;Acc:HGNC:4566]            |
| SOS1                                                                                                                  | SOS Ras/Rac guanine nucleotide exchange factor 1 [Source:HGNC Symbol;Acc:HGNC:11187] |
| SOS2                                                                                                                  | SOS Ras/Rho guanine nucleotide exchange factor 2 [Source:HGNC Symbol;Acc:HGNC:11188] |
| HRAS                                                                                                                  | Harvey rat sarcoma viral oncogene homolog [Source:HGNC Symbol;Acc:HGNC:5173]         |
| KRAS                                                                                                                  | KRAS proto-oncogene, GTPase [Source:HGNC Symbol;Acc:HGNC:6407]                       |
| NRAS                                                                                                                  | neuroblastoma RAS viral oncogene homolog [Source:HGNC Symbol;Acc:HGNC:7989]          |
| RAF1                                                                                                                  | Raf-1 proto-oncogene, serine/threonine kinase [Source:HGNC Symbol;Acc:HGNC:9829]     |
| MAP2K1                                                                                                                | mitogen-activated protein kinase kinase 1 [Source:HGNC Symbol;Acc:HGNC:6840]         |
| MAP2K2                                                                                                                | mitogen-activated protein kinase kinase 2 [Source:HGNC Symbol;Acc:HGNC:6842]         |
| MAPK1                                                                                                                 | mitogen-activated protein kinase 1 [Source:HGNC Symbol;Acc:HGNC:6871]                |
| MAPK3                                                                                                                 | mitogen-activated protein kinase 3 [Source:HGNC Symbol;Acc:HGNC:6877]                |
| SRC                                                                                                                   | SRC proto-oncogene, non-receptor tyrosine kinase [Source:HGNC Symbol;Acc:HGNC:11283] |
| MAP3K2                                                                                                                | mitogen-activated protein kinase kinase kinase 2 [Source:HGNC Symbol;Acc:HGNC:6854]  |
| MAP2K5                                                                                                                | mitogen-activated protein kinase kinase 5 [Source:HGNC Symbol;Acc:HGNC:6845]         |
| MAPK7                                                                                                                 | mitogen-activated protein kinase 7 [Source:HGNC Symbol;Acc:HGNC:6880]                |
| TUBA1B                                                                                                                | tubulin alpha 1b [Source:HGNC Symbol;Acc:HGNC:18809]                                 |
| TUBA4A                                                                                                                | tubulin alpha 4a [Source:HGNC Symbol;Acc:HGNC:12407]                                 |
| TUBA3C                                                                                                                | tubulin alpha 3c [Source:HGNC Symbol;Acc:HGNC:12408]                                 |
| TUBA1A                                                                                                                | tubulin alpha 1a [Source:HGNC Symbol;Acc:HGNC:20766]                                 |
| TUBA1C                                                                                                                | tubulin alpha 1c [Source:HGNC Symbol;Acc:HGNC:20768]                                 |
| TUBA8                                                                                                                 | tubulin alpha 8 [Source:HGNC Symbol;Acc:HGNC:12410]                                  |
| TUBA3E                                                                                                                | tubulin alpha 3e [Source:HGNC Symbol;Acc:HGNC:20765]                                 |
| TUBA3D                                                                                                                | tubulin alpha 3d [Source:HGNC Symbol;Acc:HGNC:24071]                                 |
| TUBAL3                                                                                                                | tubulin alpha like 3 [Source:HGNC Symbol;Acc:HGNC:23534]                             |
| TUBB6                                                                                                                 | tubulin beta 6 class V [Source:HGNC Symbol;Acc:HGNC:20776]                           |
| TUBB                                                                                                                  | tubulin beta class I [Source:HGNC Symbol;Acc:HGNC:20778]                             |

|        |                                                                                          |
|--------|------------------------------------------------------------------------------------------|
| TUBB1  | tubulin beta 1 class VI [Source:HGNC Symbol;Acc:HGNC:16257]                              |
| TUBB2A | tubulin beta 2A class IIa [Source:HGNC Symbol;Acc:HGNC:12412]                            |
| TUBB3  | tubulin beta 3 class III [Source:HGNC Symbol;Acc:HGNC:20772]                             |
| TUBB4A | tubulin beta 4A class IVa [Source:HGNC Symbol;Acc:HGNC:20774]                            |
| TUBB8  | tubulin beta 8 class VIII [Source:HGNC Symbol;Acc:HGNC:20773]                            |
| TUBB2B | tubulin beta 2B class IIb [Source:HGNC Symbol;Acc:HGNC:30829]                            |
| TUBB4B | tubulin beta 4B class IVb [Source:HGNC Symbol;Acc:HGNC:20771]                            |
| CSNK1D | casein kinase 1 delta [Source:HGNC Symbol;Acc:HGNC:2452]                                 |
| CDK1   | cyclin dependent kinase 1 [Source:HGNC Symbol;Acc:HGNC:1722]                             |
| TJP1   | tight junction protein 1 [Source:HGNC Symbol;Acc:HGNC:11827]                             |
| ADRB1  | adrenoceptor beta 1 [Source:HGNC Symbol;Acc:HGNC:285]                                    |
| DRD1   | dopamine receptor D1 [Source:HGNC Symbol;Acc:HGNC:3020]                                  |
| GNAS   | GNAS complex locus [Source:HGNC Symbol;Acc:HGNC:4392]                                    |
| DRD2   | dopamine receptor D2 [Source:HGNC Symbol;Acc:HGNC:3023]                                  |
| ADCY1  | adenylate cyclase 1 (brain) [Source:HGNC Symbol;Acc:HGNC:232]                            |
| ADCY2  | adenylate cyclase 2 (brain) [Source:HGNC Symbol;Acc:HGNC:233]                            |
| ADCY3  | adenylate cyclase 3 [Source:HGNC Symbol;Acc:HGNC:234]                                    |
| ADCY4  | adenylate cyclase 4 [Source:HGNC Symbol;Acc:HGNC:235]                                    |
| ADCY5  | adenylate cyclase 5 [Source:HGNC Symbol;Acc:HGNC:236]                                    |
| ADCY6  | adenylate cyclase 6 [Source:HGNC Symbol;Acc:HGNC:237]                                    |
| ADCY7  | adenylate cyclase 7 [Source:HGNC Symbol;Acc:HGNC:238]                                    |
| ADCY8  | adenylate cyclase 8 (brain) [Source:HGNC Symbol;Acc:HGNC:239]                            |
| ADCY9  | adenylate cyclase 9 [Source:HGNC Symbol;Acc:HGNC:240]                                    |
| PRKACA | protein kinase cAMP-activated catalytic subunit alpha [Source:HGNC Symbol;Acc:HGNC:9380] |
| PRKACB | protein kinase cAMP-activated catalytic subunit beta [Source:HGNC Symbol;Acc:HGNC:9381]  |
| PRKACG | protein kinase cAMP-activated catalytic subunit gamma [Source:HGNC Symbol;Acc:HGNC:9382] |
| HTR2A  | 5-hydroxytryptamine receptor 2A [Source:HGNC Symbol;Acc:HGNC:5293]                       |
| HTR2B  | 5-hydroxytryptamine receptor 2B [Source:HGNC Symbol;Acc:HGNC:5294]                       |
| HTR2C  | 5-hydroxytryptamine receptor 2C [Source:HGNC Symbol;Acc:HGNC:5295]                       |
| GRM1   | glutamate metabotropic receptor 1 [Source:HGNC Symbol;Acc:HGNC:4593]                     |
| GRM5   | glutamate metabotropic receptor 5 [Source:HGNC Symbol;Acc:HGNC:4597]                     |
| GNA11  | G protein subunit alpha 11 [Source:HGNC Symbol;Acc:HGNC:4379]                            |
| GNAQ   | G protein subunit alpha q [Source:HGNC Symbol;Acc:HGNC:4390]                             |
| PLCB1  | phospholipase C beta 1 [Source:HGNC Symbol;Acc:HGNC:15917]                               |
| PLCB2  | phospholipase C beta 2 [Source:HGNC Symbol;Acc:HGNC:9055]                                |
| PLCB3  | phospholipase C beta 3 [Source:HGNC Symbol;Acc:HGNC:9056]                                |
| PLCB4  | phospholipase C beta 4 [Source:HGNC Symbol;Acc:HGNC:9059]                                |
| ITPR1  | inositol 1,4,5-trisphosphate receptor type 1 [Source:HGNC Symbol;Acc:HGNC:6180]          |
| ITPR2  | inositol 1,4,5-trisphosphate receptor type 2 [Source:HGNC Symbol;Acc:HGNC:6181]          |
| ITPR3  | inositol 1,4,5-trisphosphate receptor type 3 [Source:HGNC Symbol;Acc:HGNC:6182]          |
| PRKCA  | protein kinase C alpha [Source:HGNC Symbol;Acc:HGNC:9393]                                |



|         |                                                                                |
|---------|--------------------------------------------------------------------------------|
| PRKCB   | protein kinase C beta [Source:HGNC Symbol;Acc:HGNC:9395]                       |
| PRKCG   | protein kinase C gamma [Source:HGNC Symbol;Acc:HGNC:9402]                      |
| GUCY1A2 | guanylate cyclase 1, soluble, alpha 2 [Source:HGNC Symbol;Acc:HGNC:4684]       |
| PRKG1   | protein kinase, cGMP-dependent, type I [Source:HGNC Symbol;Acc:HGNC:9414]      |
| PRKG2   | protein kinase, cGMP-dependent, type II [Source:HGNC Symbol;Acc:HGNC:9416]     |
| GUCY1A3 | guanylate cyclase 1, soluble, alpha 3 [Source:HGNC Symbol;Acc:HGNC:4685]       |
| CRB3    | crumbs 3, cell polarity complex component [Source:HGNC Symbol;Acc:HGNC:20237]  |
| CLDN4   | claudin 4 [Source:HGNC Symbol;Acc:HGNC:2046]                                   |
| CLDN3   | claudin 3 [Source:HGNC Symbol;Acc:HGNC:2045]                                   |
| CLDN7   | claudin 7 [Source:HGNC Symbol;Acc:HGNC:2049]                                   |
| CLDN19  | claudin 19 [Source:HGNC Symbol;Acc:HGNC:2040]                                  |
| CLDN16  | claudin 16 [Source:HGNC Symbol;Acc:HGNC:2037]                                  |
| CLDN14  | claudin 14 [Source:HGNC Symbol;Acc:HGNC:2035]                                  |
| CLDN15  | claudin 15 [Source:HGNC Symbol;Acc:HGNC:2036]                                  |
| CLDN17  | claudin 17 [Source:HGNC Symbol;Acc:HGNC:2038]                                  |
| CLDN20  | claudin 20 [Source:HGNC Symbol;Acc:HGNC:2042]                                  |
| CLDN11  | claudin 11 [Source:HGNC Symbol;Acc:HGNC:8514]                                  |
| CLDN18  | claudin 18 [Source:HGNC Symbol;Acc:HGNC:2039]                                  |
| CLDN22  | claudin 22 [Source:HGNC Symbol;Acc:HGNC:2044]                                  |
| CLDN5   | claudin 5 [Source:HGNC Symbol;Acc:HGNC:2047]                                   |
| CLDN10  | claudin 10 [Source:HGNC Symbol;Acc:HGNC:2033]                                  |
| CLDN8   | claudin 8 [Source:HGNC Symbol;Acc:HGNC:2050]                                   |
| CLDN6   | claudin 6 [Source:HGNC Symbol;Acc:HGNC:2048]                                   |
| CLDN2   | claudin 2 [Source:HGNC Symbol;Acc:HGNC:2041]                                   |
| CLDN1   | claudin 1 [Source:HGNC Symbol;Acc:HGNC:2032]                                   |
| CLDN9   | claudin 9 [Source:HGNC Symbol;Acc:HGNC:2051]                                   |
| CLDN23  | claudin 23 [Source:HGNC Symbol;Acc:HGNC:17591]                                 |
| CLDN34  | claudin 34 [Source:HGNC Symbol;Acc:HGNC:51259]                                 |
| CLDN25  | claudin 25 [Source:HGNC Symbol;Acc:HGNC:37218]                                 |
| CLDN24  | claudin 24 [Source:HGNC Symbol;Acc:HGNC:37200]                                 |
| OCLN    | occludin [Source:HGNC Symbol;Acc:HGNC:8104]                                    |
| F11R    | F11 receptor [Source:HGNC Symbol;Acc:HGNC:14685]                               |
| JAM2    | junctional adhesion molecule 2 [Source:HGNC Symbol;Acc:HGNC:14686]             |
| JAM3    | junctional adhesion molecule 3 [Source:HGNC Symbol;Acc:HGNC:15532]             |
| BVES    | blood vessel epicardial substance [Source:HGNC Symbol;Acc:HGNC:1152]           |
| CDC42   | cell division cycle 42 [Source:HGNC Symbol;Acc:HGNC:1736]                      |
| PARD6A  | par-6 family cell polarity regulator alpha [Source:HGNC Symbol;Acc:HGNC:15943] |
| PARD6G  | par-6 family cell polarity regulator gamma [Source:HGNC Symbol;Acc:HGNC:16076] |
| PARD6B  | par-6 family cell polarity regulator beta [Source:HGNC Symbol;Acc:HGNC:16245]  |
| MPP5    | membrane palmitoylated protein 5 [Source:HGNC Symbol;Acc:HGNC:18669]           |
| MPP4    | membrane palmitoylated protein 4 [Source:HGNC Symbol;Acc:HGNC:13680]           |

|          |                                                                                                                                        |
|----------|----------------------------------------------------------------------------------------------------------------------------------------|
| TJP3     | tight junction protein 3 [Source:HGNC Symbol;Acc:HGNC:11829]                                                                           |
| PATJ     | PATJ, crumbs cell polarity complex component [Source:HGNC Symbol;Acc:HGNC:28881]                                                       |
| MPDZ     | multiple PDZ domain crumbs cell polarity complex component [Source:HGNC Symbol;Acc:HGNC:7208]                                          |
| PRKCZ    | protein kinase C zeta [Source:HGNC Symbol;Acc:HGNC:9412]                                                                               |
| PRKCI    | protein kinase C iota [Source:HGNC Symbol;Acc:HGNC:9404]                                                                               |
| AMOT     | angiomin [Source:HGNC Symbol;Acc:HGNC:17810]                                                                                           |
| AMOTL1   | angiomin like 1 [Source:HGNC Symbol;Acc:HGNC:17811]                                                                                    |
| AMOTL2   | angiomin like 2 [Source:HGNC Symbol;Acc:HGNC:17812]                                                                                    |
| ARHGAP17 | Rho GTPase activating protein 17 [Source:HGNC Symbol;Acc:HGNC:18239]                                                                   |
| RAC1     | ras-related C3 botulinum toxin substrate 1 (rho family, small GTP binding protein Rac1) [Source:HGNC Symbol;Acc:HGNC:9801]             |
| NF2      | neurofibromin 2 (merlin) [Source:HGNC Symbol;Acc:HGNC:7773]                                                                            |
| LLGL2    | LLGL2, scribble cell polarity complex component [Source:HGNC Symbol;Acc:HGNC:6629]                                                     |
| LLGL1    | LLGL1, scribble cell polarity complex component [Source:HGNC Symbol;Acc:HGNC:6628]                                                     |
| DLG1     | discs large MAGUK scaffold protein 1 [Source:HGNC Symbol;Acc:HGNC:2900]                                                                |
| SCRIB    | scribbled planar cell polarity protein [Source:HGNC Symbol;Acc:HGNC:30377]                                                             |
| PPP2CA   | protein phosphatase 2 catalytic subunit alpha [Source:HGNC Symbol;Acc:HGNC:9299]                                                       |
| PPP2CB   | protein phosphatase 2 catalytic subunit beta [Source:HGNC Symbol;Acc:HGNC:9300]                                                        |
| PPP2R1B  | protein phosphatase 2 scaffold subunit Abeta [Source:HGNC Symbol;Acc:HGNC:9303]                                                        |
| PPP2R1A  | protein phosphatase 2 scaffold subunit Aalpha [Source:HGNC Symbol;Acc:HGNC:9302]                                                       |
| PPP2R2A  | protein phosphatase 2 regulatory subunit Balpha [Source:HGNC Symbol;Acc:HGNC:9304]                                                     |
| PPP2R2B  | protein phosphatase 2 regulatory subunit Bbeta [Source:HGNC Symbol;Acc:HGNC:9305]                                                      |
| PPP2R2C  | protein phosphatase 2 regulatory subunit Bgamma [Source:HGNC Symbol;Acc:HGNC:9306]                                                     |
| PPP2R2D  | protein phosphatase 2 regulatory subunit Bdelta [Source:HGNC Symbol;Acc:HGNC:23732]                                                    |
| PARD3    | par-3 family cell polarity regulator [Source:HGNC Symbol;Acc:HGNC:16051]                                                               |
| TIAM1    | T-cell lymphoma invasion and metastasis 1 [Source:HGNC Symbol;Acc:HGNC:11805]                                                          |
| TJAP1    | tight junction associated protein 1 [Source:HGNC Symbol;Acc:HGNC:17949]                                                                |
| DLG2     | discs large MAGUK scaffold protein 2 [Source:HGNC Symbol;Acc:HGNC:2901]                                                                |
| DLG3     | discs large MAGUK scaffold protein 3 [Source:HGNC Symbol;Acc:HGNC:2902]                                                                |
| NEDD4    | neural precursor cell expressed, developmentally down-regulated 4, E3 ubiquitin protein ligase [Source:HGNC Symbol;Acc:HGNC:7727]      |
| NEDD4L   | neural precursor cell expressed, developmentally down-regulated 4-like, E3 ubiquitin protein ligase [Source:HGNC Symbol;Acc:HGNC:7728] |
| CGN      | cingulin [Source:HGNC Symbol;Acc:HGNC:17429]                                                                                           |
| CGNL1    | cingulin-like 1 [Source:HGNC Symbol;Acc:HGNC:25931]                                                                                    |
| ARHGEF2  | Rho/Rac guanine nucleotide exchange factor 2 [Source:HGNC Symbol;Acc:HGNC:682]                                                         |
| RHOA     | ras homolog family member A [Source:HGNC Symbol;Acc:HGNC:667]                                                                          |
| GATA4    | GATA binding protein 4 [Source:HGNC Symbol;Acc:HGNC:4173]                                                                              |
| MARVELD3 | MARVEL domain containing 3 [Source:HGNC Symbol;Acc:HGNC:30525]                                                                         |
| MAP3K1   | mitogen-activated protein kinase kinase kinase 1 [Source:HGNC Symbol;Acc:HGNC:6848]                                                    |
| MAPK8    | mitogen-activated protein kinase 8 [Source:HGNC Symbol;Acc:HGNC:6881]                                                                  |
| MAPK10   | mitogen-activated protein kinase 10 [Source:HGNC Symbol;Acc:HGNC:6872]                                                                 |

|          |                                                                                                                 |
|----------|-----------------------------------------------------------------------------------------------------------------|
| MAPK9    | mitogen-activated protein kinase 9 [Source:HGNC Symbol;Acc:HGNC:6886]                                           |
| JUN      | Jun proto-oncogene, AP-1 transcription factor subunit [Source:HGNC Symbol;Acc:HGNC:6204]                        |
| CD1A     | CD1a molecule [Source:HGNC Symbol;Acc:HGNC:1634]                                                                |
| CD1B     | CD1b molecule [Source:HGNC Symbol;Acc:HGNC:1635]                                                                |
| CD1C     | CD1c molecule [Source:HGNC Symbol;Acc:HGNC:1636]                                                                |
| CD1D     | CD1d molecule [Source:HGNC Symbol;Acc:HGNC:1637]                                                                |
| CD1E     | CD1e molecule [Source:HGNC Symbol;Acc:HGNC:1638]                                                                |
| CFTR     | cystic fibrosis transmembrane conductance regulator [Source:HGNC Symbol;Acc:HGNC:1884]                          |
| CDK4     | cyclin dependent kinase 4 [Source:HGNC Symbol;Acc:HGNC:1773]                                                    |
| YBX3     | Y-box binding protein 3 [Source:HGNC Symbol;Acc:HGNC:2428]                                                      |
| SYMPK    | symplesin [Source:HGNC Symbol;Acc:HGNC:22935]                                                                   |
| PCNA     | proliferating cell nuclear antigen [Source:HGNC Symbol;Acc:HGNC:8729]                                           |
| CCND1    | cyclin D1 [Source:HGNC Symbol;Acc:HGNC:1582]                                                                    |
| ERBB2    | erb-b2 receptor tyrosine kinase 2 [Source:HGNC Symbol;Acc:HGNC:3430]                                            |
| RUNX1    | runt related transcription factor 1 [Source:HGNC Symbol;Acc:HGNC:10471]                                         |
| HSPA4    | heat shock protein family A (Hsp70) member 4 [Source:HGNC Symbol;Acc:HGNC:5237]                                 |
| SLC9A3R1 | SLC9A3 regulator 1 [Source:HGNC Symbol;Acc:HGNC:11075]                                                          |
| EZR      | ezrin [Source:HGNC Symbol;Acc:HGNC:12691]                                                                       |
| RDX      | radixin [Source:HGNC Symbol;Acc:HGNC:9944]                                                                      |
| MSN      | moesin [Source:HGNC Symbol;Acc:HGNC:7373]                                                                       |
| PRKCE    | protein kinase C epsilon [Source:HGNC Symbol;Acc:HGNC:9401]                                                     |
| ACTG1    | actin gamma 1 [Source:HGNC Symbol;Acc:HGNC:144]                                                                 |
| ACTB     | actin beta [Source:HGNC Symbol;Acc:HGNC:132]                                                                    |
| CACNA1D  | calcium voltage-gated channel subunit alpha1 D [Source:HGNC Symbol;Acc:HGNC:1391]                               |
| MAP3K5   | mitogen-activated protein kinase kinase kinase 5 [Source:HGNC Symbol;Acc:HGNC:6857]                             |
| MAP2K7   | mitogen-activated protein kinase kinase 7 [Source:HGNC Symbol;Acc:HGNC:6847]                                    |
| CTTN     | cortactin [Source:HGNC Symbol;Acc:HGNC:3338]                                                                    |
| HCLS1    | hematopoietic cell-specific Lyn substrate 1 [Source:HGNC Symbol;Acc:HGNC:4844]                                  |
| ACTR2    | ARP2 actin-related protein 2 homolog (yeast) [Source:HGNC Symbol;Acc:HGNC:169]                                  |
| ACTR3B   | ARP3 actin-related protein 3 homolog B (yeast) [Source:HGNC Symbol;Acc:HGNC:17256]                              |
| ACTR3C   | ARP3 actin-related protein 3 homolog C [Source:HGNC Symbol;Acc:HGNC:37282]                                      |
| ACTR3    | ARP3 actin-related protein 3 homolog (yeast) [Source:HGNC Symbol;Acc:HGNC:170]                                  |
| ARPC1B   | actin related protein 2/3 complex subunit 1B [Source:HGNC Symbol;Acc:HGNC:704]                                  |
| ARPC1A   | actin related protein 2/3 complex subunit 1A [Source:HGNC Symbol;Acc:HGNC:703]                                  |
| ARPC2    | actin related protein 2/3 complex subunit 2 [Source:HGNC Symbol;Acc:HGNC:705]                                   |
| ARPC3    | actin related protein 2/3 complex subunit 3 [Source:HGNC Symbol;Acc:HGNC:706]                                   |
| ARPC4    | actin related protein 2/3 complex subunit 4 [Source:HGNC Symbol;Acc:HGNC:707]                                   |
| ARPC5    | actin related protein 2/3 complex subunit 5 [Source:HGNC Symbol;Acc:HGNC:708]                                   |
| ARPC5L   | actin related protein 2/3 complex subunit 5 like [Source:HGNC Symbol;Acc:HGNC:23366]                            |
| WHAMM    | WAS protein homolog associated with actin, golgi membranes and microtubules [Source:HGNC Symbol;Acc:HGNC:30493] |
| WAS      | Wiskott-Aldrich syndrome [Source:HGNC Symbol;Acc:HGNC:12731]                                                    |

|          |                                                                                                        |
|----------|--------------------------------------------------------------------------------------------------------|
| VASP     | vasodilator-stimulated phosphoprotein [Source:HGNC Symbol;Acc:HGNC:12652]                              |
| RAB13    | RAB13, member RAS oncogene family [Source:HGNC Symbol;Acc:HGNC:9762]                                   |
| ARHGEF18 | Rho/Rac guanine nucleotide exchange factor 18 [Source:HGNC Symbol;Acc:HGNC:17090]                      |
| ROCK1    | Rho associated coiled-coil containing protein kinase 1 [Source:HGNC Symbol;Acc:HGNC:10251]             |
| ROCK2    | Rho associated coiled-coil containing protein kinase 2 [Source:HGNC Symbol;Acc:HGNC:10252]             |
| MYL2     | myosin light chain 2 [Source:HGNC Symbol;Acc:HGNC:7583]                                                |
| EPB41L4B | erythrocyte membrane protein band 4.1 like 4B [Source:HGNC Symbol;Acc:HGNC:19818]                      |
| STK11    | serine/threonine kinase 11 [Source:HGNC Symbol;Acc:HGNC:11389]                                         |
| PRKAA1   | protein kinase AMP-activated catalytic subunit alpha 1 [Source:HGNC Symbol;Acc:HGNC:9376]              |
| PRKAA2   | protein kinase AMP-activated catalytic subunit alpha 2 [Source:HGNC Symbol;Acc:HGNC:9377]              |
| PRKAB1   | protein kinase AMP-activated non-catalytic subunit beta 1 [Source:HGNC Symbol;Acc:HGNC:9378]           |
| PRKAB2   | protein kinase AMP-activated non-catalytic subunit beta 2 [Source:HGNC Symbol;Acc:HGNC:9379]           |
| PRKAG1   | protein kinase AMP-activated non-catalytic subunit gamma 1 [Source:HGNC Symbol;Acc:HGNC:9385]          |
| PRKAG3   | protein kinase AMP-activated non-catalytic subunit gamma 3 [Source:HGNC Symbol;Acc:HGNC:9387]          |
| PRKAG2   | protein kinase AMP-activated non-catalytic subunit gamma 2 [Source:HGNC Symbol;Acc:HGNC:9386]          |
| MYH9     | myosin, heavy chain 9, non-muscle [Source:HGNC Symbol;Acc:HGNC:7579]                                   |
| MYH10    | myosin, heavy chain 10, non-muscle [Source:HGNC Symbol;Acc:HGNC:7568]                                  |
| MYH11    | myosin, heavy chain 11, smooth muscle [Source:HGNC Symbol;Acc:HGNC:7569]                               |
| MYH14    | myosin, heavy chain 14, non-muscle [Source:HGNC Symbol;Acc:HGNC:23212]                                 |
| MYL6B    | myosin light chain 6B [Source:HGNC Symbol;Acc:HGNC:29823]                                              |
| MYL6     | myosin light chain 6 [Source:HGNC Symbol;Acc:HGNC:7587]                                                |
| MYL9     | myosin light chain 9 [Source:HGNC Symbol;Acc:HGNC:15754]                                               |
| MYL12B   | myosin light chain 12B [Source:HGNC Symbol;Acc:HGNC:29827]                                             |
| MYL12A   | myosin light chain 12A [Source:HGNC Symbol;Acc:HGNC:16701]                                             |
| IGSF5    | immunoglobulin superfamily member 5 [Source:HGNC Symbol;Acc:HGNC:5952]                                 |
| MAGI1    | membrane associated guanylate kinase, WW and PDZ domain containing 1 [Source:HGNC Symbol;Acc:HGNC:946] |
| SYNPO    | synaptopodin [Source:HGNC Symbol;Acc:HGNC:30672]                                                       |
| ACTN1    | actinin alpha 1 [Source:HGNC Symbol;Acc:HGNC:163]                                                      |
| ACTN4    | actinin alpha 4 [Source:HGNC Symbol;Acc:HGNC:166]                                                      |
| MICAL2   | MICAL like 2 [Source:HGNC Symbol;Acc:HGNC:29672]                                                       |
| RAB8A    | RAB8A, member RAS oncogene family [Source:HGNC Symbol;Acc:HGNC:7007]                                   |
| RAB8B    | RAB8B, member RAS oncogene family [Source:HGNC Symbol;Acc:HGNC:30273]                                  |
| RAPGEF6  | Rap guanine nucleotide exchange factor 6 [Source:HGNC Symbol;Acc:HGNC:20655]                           |
| RAP1A    | RAP1A, member of RAS oncogene family [Source:HGNC Symbol;Acc:HGNC:9855]                                |
| ITGB1    | integrin subunit beta 1 [Source:HGNC Symbol;Acc:HGNC:6153]                                             |
| TJP2     | tight junction protein 2 [Source:HGNC Symbol;Acc:HGNC:11828]                                           |
| RAPGEF2  | Rap guanine nucleotide exchange factor 2 [Source:HGNC Symbol;Acc:HGNC:16854]                           |
| RAP2C    | RAP2C, member of RAS oncogene family [Source:HGNC Symbol;Acc:HGNC:21165]                               |

|          |                                                                                                   |
|----------|---------------------------------------------------------------------------------------------------|
| MARVELD2 | MARVEL domain containing 2 [Source:HGNC Symbol;Acc:HGNC:26401]                                    |
| MLLT4    | myeloid/lymphoid or mixed-lineage leukemia; translocated to, 4 [Source:HGNC Symbol;Acc:HGNC:7137] |
| CD58     | CD58 molecule [Source:HGNC Symbol;Acc:HGNC:1688]                                                  |
| CD2      | CD2 molecule [Source:HGNC Symbol;Acc:HGNC:1639]                                                   |
| IGSF11   | immunoglobulin superfamily member 11 [Source:HGNC Symbol;Acc:HGNC:16669]                          |
| CD80     | CD80 molecule [Source:HGNC Symbol;Acc:HGNC:1700]                                                  |
| CD274    | CD274 molecule [Source:HGNC Symbol;Acc:HGNC:17635]                                                |
| CD28     | CD28 molecule [Source:HGNC Symbol;Acc:HGNC:1653]                                                  |
| CD86     | CD86 molecule [Source:HGNC Symbol;Acc:HGNC:1705]                                                  |
| CTLA4    | cytotoxic T-lymphocyte associated protein 4 [Source:HGNC Symbol;Acc:HGNC:2505]                    |
| ICOSLG   | inducible T-cell costimulator ligand [Source:HGNC Symbol;Acc:HGNC:17087]                          |
| ICOS     | inducible T-cell costimulator [Source:HGNC Symbol;Acc:HGNC:5351]                                  |
| HLA-DMA  | major histocompatibility complex, class II, DM alpha [Source:HGNC Symbol;Acc:HGNC:4934]           |
| HLA-DMB  | major histocompatibility complex, class II, DM beta [Source:HGNC Symbol;Acc:HGNC:4935]            |
| HLA-DOA  | major histocompatibility complex, class II, DO alpha [Source:HGNC Symbol;Acc:HGNC:4936]           |
| HLA-DOB  | major histocompatibility complex, class II, DO beta [Source:HGNC Symbol;Acc:HGNC:4937]            |
| HLA-DPA1 | major histocompatibility complex, class II, DP alpha 1 [Source:HGNC Symbol;Acc:HGNC:4938]         |
| HLA-DPB1 | major histocompatibility complex, class II, DP beta 1 [Source:HGNC Symbol;Acc:HGNC:4940]          |
| HLA-DQA1 | major histocompatibility complex, class II, DQ alpha 1 [Source:HGNC Symbol;Acc:HGNC:4942]         |
| HLA-DQA2 | major histocompatibility complex, class II, DQ alpha 2 [Source:HGNC Symbol;Acc:HGNC:4943]         |
| HLA-DQB1 | major histocompatibility complex, class II, DQ beta 1 [Source:HGNC Symbol;Acc:HGNC:4944]          |
| HLA-DRA  | major histocompatibility complex, class II, DR alpha [Source:HGNC Symbol;Acc:HGNC:4947]           |
| HLA-DRB1 | major histocompatibility complex, class II, DR beta 1 [Source:HGNC Symbol;Acc:HGNC:4948]          |
| HLA-DRB3 | major histocompatibility complex, class II, DR beta 3 [Source:HGNC Symbol;Acc:HGNC:4951]          |
| HLA-DRB4 | major histocompatibility complex, class II, DR beta 4 [Source:HGNC Symbol;Acc:HGNC:4952]          |
| HLA-DRB5 | major histocompatibility complex, class II, DR beta 5 [Source:HGNC Symbol;Acc:HGNC:4953]          |
| CD4      | CD4 molecule [Source:HGNC Symbol;Acc:HGNC:1678]                                                   |
| HLA-A    | major histocompatibility complex, class I, A [Source:HGNC Symbol;Acc:HGNC:4931]                   |
| HLA-B    | major histocompatibility complex, class I, B [Source:HGNC Symbol;Acc:HGNC:4932]                   |
| HLA-C    | major histocompatibility complex, class I, C [Source:HGNC Symbol;Acc:HGNC:4933]                   |
| HLA-F    | major histocompatibility complex, class I, F [Source:HGNC Symbol;Acc:HGNC:4963]                   |
| HLA-G    | major histocompatibility complex, class I, G [Source:HGNC Symbol;Acc:HGNC:4964]                   |
| HLA-E    | major histocompatibility complex, class I, E [Source:HGNC Symbol;Acc:HGNC:4962]                   |
| CD8A     | CD8a molecule [Source:HGNC Symbol;Acc:HGNC:1706]                                                  |
| CD8B     | CD8b molecule [Source:HGNC Symbol;Acc:HGNC:1707]                                                  |
| PDCD1LG2 | programmed cell death 1 ligand 2 [Source:HGNC Symbol;Acc:HGNC:18731]                              |
| CD276    | CD276 molecule [Source:HGNC Symbol;Acc:HGNC:19137]                                                |
| VTCN1    | V-set domain containing T cell activation inhibitor 1 [Source:HGNC Symbol;Acc:HGNC:28873]         |
| PDCD1    | programmed cell death 1 [Source:HGNC Symbol;Acc:HGNC:8760]                                        |
| CD40     | CD40 molecule [Source:HGNC Symbol;Acc:HGNC:11919]                                                 |
| CD40LG   | CD40 ligand [Source:HGNC Symbol;Acc:HGNC:11935]                                                   |

|         |                                                                                        |
|---------|----------------------------------------------------------------------------------------|
| ALCAM   | activated leukocyte cell adhesion molecule [Source:HGNC Symbol;Acc:HGNC:400]           |
| CD6     | CD6 molecule [Source:HGNC Symbol;Acc:HGNC:1691]                                        |
| PVR     | poliovirus receptor [Source:HGNC Symbol;Acc:HGNC:9705]                                 |
| CD226   | CD226 molecule [Source:HGNC Symbol;Acc:HGNC:16961]                                     |
| NECTIN2 | nectin cell adhesion molecule 2 [Source:HGNC Symbol;Acc:HGNC:9707]                     |
| TIGIT   | T-cell immunoreceptor with Ig and ITIM domains [Source:HGNC Symbol;Acc:HGNC:26838]     |
| ITGAL   | integrin subunit alpha L [Source:HGNC Symbol;Acc:HGNC:6148]                            |
| ITGB2   | integrin subunit beta 2 [Source:HGNC Symbol;Acc:HGNC:6155]                             |
| ICAM1   | intercellular adhesion molecule 1 [Source:HGNC Symbol;Acc:HGNC:5344]                   |
| ICAM2   | intercellular adhesion molecule 2 [Source:HGNC Symbol;Acc:HGNC:5345]                   |
| ICAM3   | intercellular adhesion molecule 3 [Source:HGNC Symbol;Acc:HGNC:5346]                   |
| CD22    | CD22 molecule [Source:HGNC Symbol;Acc:HGNC:1643]                                       |
| PTPRC   | protein tyrosine phosphatase, receptor type C [Source:HGNC Symbol;Acc:HGNC:9666]       |
| SIGLEC1 | sialic acid binding Ig like lectin 1 [Source:HGNC Symbol;Acc:HGNC:11127]               |
| SPN     | sialophorin [Source:HGNC Symbol;Acc:HGNC:11249]                                        |
| NECTIN3 | nectin cell adhesion molecule 3 [Source:HGNC Symbol;Acc:HGNC:17664]                    |
| ESAM    | endothelial cell adhesion molecule [Source:HGNC Symbol;Acc:HGNC:17474]                 |
| CDH5    | cadherin 5 [Source:HGNC Symbol;Acc:HGNC:1764]                                          |
| PECAM1  | platelet and endothelial cell adhesion molecule 1 [Source:HGNC Symbol;Acc:HGNC:8823]   |
| CD99    | CD99 molecule [Source:HGNC Symbol;Acc:HGNC:7082]                                       |
| CD99L2  | CD99 molecule like 2 [Source:HGNC Symbol;Acc:HGNC:18237]                               |
| ITGAM   | integrin subunit alpha M [Source:HGNC Symbol;Acc:HGNC:6149]                            |
| SELPLG  | selectin P ligand [Source:HGNC Symbol;Acc:HGNC:10722]                                  |
| SELP    | selectin P [Source:HGNC Symbol;Acc:HGNC:10721]                                         |
| ITGA4   | integrin subunit alpha 4 [Source:HGNC Symbol;Acc:HGNC:6140]                            |
| ITGA9   | integrin subunit alpha 9 [Source:HGNC Symbol;Acc:HGNC:6145]                            |
| VCAM1   | vascular cell adhesion molecule 1 [Source:HGNC Symbol;Acc:HGNC:12663]                  |
| ITGB7   | integrin subunit beta 7 [Source:HGNC Symbol;Acc:HGNC:6162]                             |
| MADCAM1 | mucosal vascular addressin cell adhesion molecule 1 [Source:HGNC Symbol;Acc:HGNC:6765] |
| SELL    | selectin L [Source:HGNC Symbol;Acc:HGNC:10720]                                         |
| CD34    | CD34 molecule [Source:HGNC Symbol;Acc:HGNC:1662]                                       |
| GLG1    | golgi glycoprotein 1 [Source:HGNC Symbol;Acc:HGNC:4316]                                |
| SELE    | selectin E [Source:HGNC Symbol;Acc:HGNC:10718]                                         |
| NECTIN1 | nectin cell adhesion molecule 1 [Source:HGNC Symbol;Acc:HGNC:9706]                     |
| CDH2    | cadherin 2 [Source:HGNC Symbol;Acc:HGNC:1759]                                          |
| NCAM1   | neural cell adhesion molecule 1 [Source:HGNC Symbol;Acc:HGNC:7656]                     |
| NCAM2   | neural cell adhesion molecule 2 [Source:HGNC Symbol;Acc:HGNC:7657]                     |
| L1CAM   | L1 cell adhesion molecule [Source:HGNC Symbol;Acc:HGNC:6470]                           |
| CADM1   | cell adhesion molecule 1 [Source:HGNC Symbol;Acc:HGNC:5951]                            |
| NEGR1   | neuronal growth regulator 1 [Source:HGNC Symbol;Acc:HGNC:17302]                        |
| NTNG1   | netrin G1 [Source:HGNC Symbol;Acc:HGNC:23319]                                          |

|          |                                                                                  |
|----------|----------------------------------------------------------------------------------|
| LRRC4C   | leucine rich repeat containing 4C [Source:HGNC Symbol;Acc:HGNC:29317]            |
| NTNG2    | netrin G2 [Source:HGNC Symbol;Acc:HGNC:14288]                                    |
| LRRC4    | leucine rich repeat containing 4 [Source:HGNC Symbol;Acc:HGNC:15586]             |
| PTPRF    | protein tyrosine phosphatase, receptor type F [Source:HGNC Symbol;Acc:HGNC:9670] |
| LRRC4B   | leucine rich repeat containing 4B [Source:HGNC Symbol;Acc:HGNC:25042]            |
| SDC1     | syndecan 1 [Source:HGNC Symbol;Acc:HGNC:10658]                                   |
| SDC2     | syndecan 2 [Source:HGNC Symbol;Acc:HGNC:10659]                                   |
| SDC3     | syndecan 3 [Source:HGNC Symbol;Acc:HGNC:10660]                                   |
| SDC4     | syndecan 4 [Source:HGNC Symbol;Acc:HGNC:10661]                                   |
| ITGAV    | integrin subunit alpha V [Source:HGNC Symbol;Acc:HGNC:6150]                      |
| ITGB8    | integrin subunit beta 8 [Source:HGNC Symbol;Acc:HGNC:6163]                       |
| ITGA8    | integrin subunit alpha 8 [Source:HGNC Symbol;Acc:HGNC:6144]                      |
| NRXN1    | neurexin 1 [Source:HGNC Symbol;Acc:HGNC:8008]                                    |
| NRXN2    | neurexin 2 [Source:HGNC Symbol;Acc:HGNC:8009]                                    |
| NRXN3    | neurexin 3 [Source:HGNC Symbol;Acc:HGNC:8010]                                    |
| NLGN1    | neuroligin 1 [Source:HGNC Symbol;Acc:HGNC:14291]                                 |
| NLGN2    | neuroligin 2 [Source:HGNC Symbol;Acc:HGNC:14290]                                 |
| NLGN3    | neuroligin 3 [Source:HGNC Symbol;Acc:HGNC:14289]                                 |
| NLGN4X   | neuroligin 4, X-linked [Source:HGNC Symbol;Acc:HGNC:14287]                       |
| NLGN4Y   | neuroligin 4, Y-linked [Source:HGNC Symbol;Acc:HGNC:15529]                       |
| CADM3    | cell adhesion molecule 3 [Source:HGNC Symbol;Acc:HGNC:17601]                     |
| NRCAM    | neuronal cell adhesion molecule [Source:HGNC Symbol;Acc:HGNC:7994]               |
| CNTN1    | contactin 1 [Source:HGNC Symbol;Acc:HGNC:2171]                                   |
| PTPRM    | protein tyrosine phosphatase, receptor type M [Source:HGNC Symbol;Acc:HGNC:9675] |
| CNTN2    | contactin 2 [Source:HGNC Symbol;Acc:HGNC:2172]                                   |
| NFASC    | neurofascin [Source:HGNC Symbol;Acc:HGNC:29866]                                  |
| CNTNAP1  | contactin associated protein 1 [Source:HGNC Symbol;Acc:HGNC:8011]                |
| CNTNAP2  | contactin associated protein-like 2 [Source:HGNC Symbol;Acc:HGNC:13830]          |
| MPZ      | myelin protein zero [Source:HGNC Symbol;Acc:HGNC:7225]                           |
| MPZL1    | myelin protein zero like 1 [Source:HGNC Symbol;Acc:HGNC:7226]                    |
| MAG      | myelin associated glycoprotein [Source:HGNC Symbol;Acc:HGNC:6783]                |
| CDH1     | cadherin 1 [Source:HGNC Symbol;Acc:HGNC:1748]                                    |
| VCAN     | versican [Source:HGNC Symbol;Acc:HGNC:2464]                                      |
| ITGA6    | integrin subunit alpha 6 [Source:HGNC Symbol;Acc:HGNC:6142]                      |
| CDH3     | cadherin 3 [Source:HGNC Symbol;Acc:HGNC:1762]                                    |
| CDH4     | cadherin 4 [Source:HGNC Symbol;Acc:HGNC:1763]                                    |
| CDH15    | cadherin 15 [Source:HGNC Symbol;Acc:HGNC:1754]                                   |
| NEO1     | neogenin 1 [Source:HGNC Symbol;Acc:HGNC:7754]                                    |
| C10orf54 | chromosome 10 open reading frame 54 [Source:HGNC Symbol;Acc:HGNC:30085]          |
| YY1AP1   | YY1 associated protein 1 [Source:HGNC Symbol;Acc:HGNC:30935]                     |
| TAZ      | tafazzin [Source:HGNC Symbol;Acc:HGNC:11577]                                     |

|         |                                                                                                                  |
|---------|------------------------------------------------------------------------------------------------------------------|
| A1BG    | alpha-1-B glycoprotein [Source:HGNC Symbol;Acc:HGNC:5]                                                           |
| A2M     | alpha-2-macroglobulin [Source:HGNC Symbol;Acc:HGNC:7]                                                            |
| SGMS1   | sphingomyelin synthase 1 [Source:HGNC Symbol;Acc:HGNC:29799]                                                     |
| SAV1    | salvador family WW domain containing protein 1 [Source:HGNC Symbol;Acc:HGNC:17795]                               |
| LARGE1  | LARGE xylosyl- and glucuronyltransferase 1 [Source:HGNC Symbol;Acc:HGNC:6511]                                    |
| CRB1    | crumbs 1, cell polarity complex component [Source:HGNC Symbol;Acc:HGNC:2343]                                     |
| SMAD1   | SMAD family member 1 [Source:HGNC Symbol;Acc:HGNC:6767]                                                          |
| SMAD7   | SMAD family member 7 [Source:HGNC Symbol;Acc:HGNC:6773]                                                          |
| RUNX2   | runt related transcription factor 2 [Source:HGNC Symbol;Acc:HGNC:10472]                                          |
| TP73    | tumor protein p73 [Source:HGNC Symbol;Acc:HGNC:12003]                                                            |
| ERBB4   | erb-b2 receptor tyrosine kinase 4 [Source:HGNC Symbol;Acc:HGNC:3432]                                             |
| CTGF    | connective tissue growth factor [Source:HGNC Symbol;Acc:HGNC:2500]                                               |
| CYR61   | cysteine rich angiogenic inducer 61 [Source:HGNC Symbol;Acc:HGNC:2654]                                           |
| AXL     | AXL receptor tyrosine kinase [Source:HGNC Symbol;Acc:HGNC:905]                                                   |
| ANKRD1  | ankyrin repeat domain 1 [Source:HGNC Symbol;Acc:HGNC:15819]                                                      |
| AREG    | amphiregulin [Source:HGNC Symbol;Acc:HGNC:651]                                                                   |
| ADAMTS1 | ADAM metalloproteinase with thrombospondin type 1 motif 1 [Source:HGNC Symbol;Acc:HGNC:217]                      |
| THBS1   | thrombospondin 1 [Source:HGNC Symbol;Acc:HGNC:11785]                                                             |
| WWC1    | WW and C2 domain containing 1 [Source:HGNC Symbol;Acc:HGNC:29435]                                                |
| YWHAQ   | tyrosine 3-monooxygenase/tryptophan 5-monooxygenase activation protein theta [Source:HGNC Symbol;Acc:HGNC:12854] |
| SGCG    | sarcoglycan gamma [Source:HGNC Symbol;Acc:HGNC:10809]                                                            |
| AAMP    | angio associated migratory cell protein [Source:HGNC Symbol;Acc:HGNC:18]                                         |
| CDH17   | cadherin 17 [Source:HGNC Symbol;Acc:HGNC:1756]                                                                   |
| NOV     | nephroblastoma overexpressed [Source:HGNC Symbol;Acc:HGNC:7885]                                                  |
| STAT3   | signal transducer and activator of transcription 3 [Source:HGNC Symbol;Acc:HGNC:11364]                           |
| LATS1   | large tumor suppressor kinase 1 [Source:HGNC Symbol;Acc:HGNC:6514]                                               |
| LATS2   | large tumor suppressor kinase 2 [Source:HGNC Symbol;Acc:HGNC:6515]                                               |
| STK3    | serine/threonine kinase 3 [Source:HGNC Symbol;Acc:HGNC:11406]                                                    |
| STK4    | serine/threonine kinase 4 [Source:HGNC Symbol;Acc:HGNC:11408]                                                    |
| WWTR1   | WW domain containing transcription regulator 1 [Source:HGNC Symbol;Acc:HGNC:24042]                               |
| FRMD6   | FERM domain containing 6 [Source:HGNC Symbol;Acc:HGNC:19839]                                                     |
| MST1    | macrophage stimulating 1 [Source:HGNC Symbol;Acc:HGNC:7380]                                                      |
| MYO1C   | myosin IC [Source:HGNC Symbol;Acc:HGNC:7597]                                                                     |
| PDK1    | pyruvate dehydrogenase kinase 1 [Source:HGNC Symbol;Acc:HGNC:8809]                                               |
| PIK3CA  | phosphatidylinositol-4,5-bisphosphate 3-kinase catalytic subunit alpha [Source:HGNC Symbol;Acc:HGNC:8975]        |
| PTPN14  | protein tyrosine phosphatase, non-receptor type 14 [Source:HGNC Symbol;Acc:HGNC:9647]                            |
| TBX5    | T-box 5 [Source:HGNC Symbol;Acc:HGNC:11604]                                                                      |
| TIE1    | tyrosine kinase with immunoglobulin like and EGF like domains 1 [Source:HGNC Symbol;Acc:HGNC:11809]              |
| MOB1A   | MOB kinase activator 1A [Source:HGNC Symbol;Acc:HGNC:16015]                                                      |



|         |                                                                                            |
|---------|--------------------------------------------------------------------------------------------|
| MOB1B   | MOB kinase activator 1B [Source:HGNC Symbol;Acc:HGNC:29801]                                |
| TEAD1   | TEA domain transcription factor 1 [Source:HGNC Symbol;Acc:HGNC:11714]                      |
| TEK     | TEK receptor tyrosine kinase [Source:HGNC Symbol;Acc:HGNC:11724]                           |
| YAP1    | Yes associated protein 1 [Source:HGNC Symbol;Acc:HGNC:16262]                               |
| MAP4K1  | mitogen-activated protein kinase kinase kinase kinase 1 [Source:HGNC Symbol;Acc:HGNC:6863] |
| MAP4K2  | mitogen-activated protein kinase kinase kinase kinase 2 [Source:HGNC Symbol;Acc:HGNC:6864] |
| MAP4K3  | mitogen-activated protein kinase kinase kinase kinase 3 [Source:HGNC Symbol;Acc:HGNC:6865] |
| MAP4K5  | mitogen-activated protein kinase kinase kinase kinase 5 [Source:HGNC Symbol;Acc:HGNC:6867] |
| SMAD2   | SMAD family member 2 [Source:HGNC Symbol;Acc:HGNC:6768]                                    |
| SMAD3   | SMAD family member 3 [Source:HGNC Symbol;Acc:HGNC:6769]                                    |
| TAOK1   | TAO kinase 1 [Source:HGNC Symbol;Acc:HGNC:29259]                                           |
| TAOK2   | TAO kinase 2 [Source:HGNC Symbol;Acc:HGNC:16835]                                           |
| TAOK3   | TAO kinase 3 [Source:HGNC Symbol;Acc:HGNC:18133]                                           |
| ANGPT1  | angiopoietin 1 [Source:HGNC Symbol;Acc:HGNC:484]                                           |
| ANGPT2  | angiopoietin 2 [Source:HGNC Symbol;Acc:HGNC:485]                                           |
| ANGPTL1 | angiopoietin like 1 [Source:HGNC Symbol;Acc:HGNC:489]                                      |
| ANGPT4  | angiopoietin 4 [Source:HGNC Symbol;Acc:HGNC:487]                                           |
| MAPK4   | mitogen-activated protein kinase 4 [Source:HGNC Symbol;Acc:HGNC:6878]                      |
| TEAD2   | TEA domain transcription factor 2 [Source:HGNC Symbol;Acc:HGNC:11715]                      |
| TEAD3   | TEA domain transcription factor 3 [Source:HGNC Symbol;Acc:HGNC:11716]                      |
| TEAD4   | TEA domain transcription factor 4 [Source:HGNC Symbol;Acc:HGNC:11717]                      |
| SPTA1   | spectrin alpha, erythrocytic 1 [Source:HGNC Symbol;Acc:HGNC:11272]                         |
| ITGA5   | integrin subunit alpha 5 [Source:HGNC Symbol;Acc:HGNC:6141]                                |
| ITGB3   | integrin subunit beta 3 [Source:HGNC Symbol;Acc:HGNC:6156]                                 |
| ITGB5   | integrin subunit beta 5 [Source:HGNC Symbol;Acc:HGNC:6160]                                 |
| ITGA2   | integrin subunit alpha 2 [Source:HGNC Symbol;Acc:HGNC:6137]                                |
| ITGA2B  | integrin subunit alpha 2b [Source:HGNC Symbol;Acc:HGNC:6138]                               |
| CTNNB1  | catenin beta 1 [Source:HGNC Symbol;Acc:HGNC:2514]                                          |
| CTNNA1  | catenin alpha 1 [Source:HGNC Symbol;Acc:HGNC:2509]                                         |
| CXCL8   | C-X-C motif chemokine ligand 8 [Source:HGNC Symbol;Acc:HGNC:6025]                          |
| WNT1    | Wnt family member 1 [Source:HGNC Symbol;Acc:HGNC:12774]                                    |
| VEGFA   | vascular endothelial growth factor A [Source:HGNC Symbol;Acc:HGNC:12680]                   |
| WDR45   | WD repeat domain 45 [Source:HGNC Symbol;Acc:HGNC:28912]                                    |
| KDR     | kinase insert domain receptor [Source:HGNC Symbol;Acc:HGNC:6307]                           |
| TGFB1   | transforming growth factor beta 1 [Source:HGNC Symbol;Acc:HGNC:11766]                      |
| SMAD4   | SMAD family member 4 [Source:HGNC Symbol;Acc:HGNC:6770]                                    |
| SMAD5   | SMAD family member 5 [Source:HGNC Symbol;Acc:HGNC:6771]                                    |
| SMAD6   | SMAD family member 6 [Source:HGNC Symbol;Acc:HGNC:6772]                                    |
| SMAD9   | SMAD family member 9 [Source:HGNC Symbol;Acc:HGNC:6774]                                    |
| PIK3C3  | phosphatidylinositol 3-kinase catalytic subunit type 3 [Source:HGNC Symbol;Acc:HGNC:8974]  |
| PIK3R4  | phosphoinositide-3-kinase regulatory subunit 4 [Source:HGNC Symbol;Acc:HGNC:8982]          |

|           |                                                                                          |
|-----------|------------------------------------------------------------------------------------------|
| LAMP1     | lysosomal associated membrane protein 1 [Source:HGNC Symbol;Acc:HGNC:6499]               |
| LAMP2     | lysosomal associated membrane protein 2 [Source:HGNC Symbol;Acc:HGNC:6501]               |
| NFKB1     | nuclear factor kappa B subunit 1 [Source:HGNC Symbol;Acc:HGNC:7794]                      |
| NFKB2     | nuclear factor kappa B subunit 2 [Source:HGNC Symbol;Acc:HGNC:7795]                      |
| HMGB1     | high mobility group box 1 [Source:HGNC Symbol;Acc:HGNC:4983]                             |
| BMP1      | bone morphogenetic protein 1 [Source:HGNC Symbol;Acc:HGNC:1067]                          |
| BMP2      | bone morphogenetic protein 2 [Source:HGNC Symbol;Acc:HGNC:1069]                          |
| BMP3      | bone morphogenetic protein 3 [Source:HGNC Symbol;Acc:HGNC:1070]                          |
| BMP4      | bone morphogenetic protein 4 [Source:HGNC Symbol;Acc:HGNC:1071]                          |
| BMP5      | bone morphogenetic protein 5 [Source:HGNC Symbol;Acc:HGNC:1072]                          |
| BMP6      | bone morphogenetic protein 6 [Source:HGNC Symbol;Acc:HGNC:1073]                          |
| BMP7      | bone morphogenetic protein 7 [Source:HGNC Symbol;Acc:HGNC:1074]                          |
| BMP8B     | bone morphogenetic protein 8b [Source:HGNC Symbol;Acc:HGNC:1075]                         |
| GDF2      | growth differentiation factor 2 [Source:HGNC Symbol;Acc:HGNC:4217]                       |
| BMP10     | bone morphogenetic protein 10 [Source:HGNC Symbol;Acc:HGNC:20869]                        |
| BECN1     | beclin 1 [Source:HGNC Symbol;Acc:HGNC:1034]                                              |
| CAV1      | caveolin 1 [Source:HGNC Symbol;Acc:HGNC:1527]                                            |
| TSC2      | tuberous sclerosis 2 [Source:HGNC Symbol;Acc:HGNC:12363]                                 |
| AKT1      | AKT serine/threonine kinase 1 [Source:HGNC Symbol;Acc:HGNC:391]                          |
| PARK2     | parkin RBR E3 ubiquitin protein ligase [Source:HGNC Symbol;Acc:HGNC:8607]                |
| PINK1     | PTEN induced putative kinase 1 [Source:HGNC Symbol;Acc:HGNC:14581]                       |
| MAP1LC3A  | microtubule associated protein 1 light chain 3 alpha [Source:HGNC Symbol;Acc:HGNC:6838]  |
| MAP1LC3B  | microtubule associated protein 1 light chain 3 beta [Source:HGNC Symbol;Acc:HGNC:13352]  |
| MAP1LC3C  | microtubule associated protein 1 light chain 3 gamma [Source:HGNC Symbol;Acc:HGNC:13353] |
| IFNG      | interferon, gamma [Source:HGNC Symbol;Acc:HGNC:5438]                                     |
| IFNB1     | interferon beta 1 [Source:HGNC Symbol;Acc:HGNC:5434]                                     |
| CDH19     | cadherin 19 [Source:HGNC Symbol;Acc:HGNC:1758]                                           |
| CDH12     | cadherin 12 [Source:HGNC Symbol;Acc:HGNC:1751]                                           |
| HIF1A     | hypoxia inducible factor 1 alpha subunit [Source:HGNC Symbol;Acc:HGNC:4910]              |
| TNFSF4    | tumor necrosis factor superfamily member 4 [Source:HGNC Symbol;Acc:HGNC:11934]           |
| NOTCH1    | notch 1 [Source:HGNC Symbol;Acc:HGNC:7881]                                               |
| NOTCH2    | notch 2 [Source:HGNC Symbol;Acc:HGNC:7882]                                               |
| NOTCH3    | notch 3 [Source:HGNC Symbol;Acc:HGNC:7883]                                               |
| NOTCH4    | notch 4 [Source:HGNC Symbol;Acc:HGNC:7884]                                               |
| TANK      | TRAF family member associated NFKB activator [Source:HGNC Symbol;Acc:HGNC:11562]         |
| PTEN      | phosphatase and tensin homolog [Source:HGNC Symbol;Acc:HGNC:9588]                        |
| NLRP3     | NLR family pyrin domain containing 3 [Source:HGNC Symbol;Acc:HGNC:16400]                 |
| SNCA      | synuclein alpha [Source:HGNC Symbol;Acc:HGNC:11138]                                      |
| PTGER2    | prostaglandin E receptor 2 [Source:HGNC Symbol;Acc:HGNC:9594]                            |
| GABARAPL1 | GABA type A receptor associated protein like 1 [Source:HGNC Symbol;Acc:HGNC:4068]        |
| GABARAPL2 | GABA type A receptor associated protein like 2 [Source:HGNC Symbol;Acc:HGNC:13291]       |

|          |                                                                                          |
|----------|------------------------------------------------------------------------------------------|
| ATG16L1  | autophagy related 16 like 1 [Source:HGNC Symbol;Acc:HGNC:21498]                          |
| BNIP3    | BCL2/adenovirus E1B 19kDa interacting protein 3 [Source:HGNC Symbol;Acc:HGNC:1084]       |
| BCL2     | B-cell CLL/lymphoma 2 [Source:HGNC Symbol;Acc:HGNC:990]                                  |
| ULK1     | unc-51 like autophagy activating kinase 1 [Source:HGNC Symbol;Acc:HGNC:12558]            |
| SIRT1    | sirtuin 1 [Source:HGNC Symbol;Acc:HGNC:14929]                                            |
| FOXO1    | forkhead box O1 [Source:HGNC Symbol;Acc:HGNC:3819]                                       |
| PFKFB3   | 6-phosphofructo-2-kinase/fructose-2,6-biphosphatase 3 [Source:HGNC Symbol;Acc:HGNC:8874] |
| SLC2A1   | solute carrier family 2 member 1 [Source:HGNC Symbol;Acc:HGNC:11005]                     |
| DLL4     | delta like canonical Notch ligand 4 [Source:HGNC Symbol;Acc:HGNC:2910]                   |
| IL6      | interleukin 6 [Source:HGNC Symbol;Acc:HGNC:6018]                                         |
| HSPA8    | heat shock protein family A (Hsp70) member 8 [Source:HGNC Symbol;Acc:HGNC:5241]          |
| RB1CC1   | RB1 inducible coiled-coil 1 [Source:HGNC Symbol;Acc:HGNC:15574]                          |
| ATG13    | autophagy related 13 [Source:HGNC Symbol;Acc:HGNC:29091]                                 |
| ATG101   | autophagy related 101 [Source:HGNC Symbol;Acc:HGNC:25679]                                |
| SERPINA1 | serpin family A member 1 [Source:HGNC Symbol;Acc:HGNC:8941]                              |
| ATG14    | autophagy related 14 [Source:HGNC Symbol;Acc:HGNC:19962]                                 |
| NRBF2    | nuclear receptor binding factor 2 [Source:HGNC Symbol;Acc:HGNC:19692]                    |
| ATG2A    | autophagy related 2A [Source:HGNC Symbol;Acc:HGNC:29028]                                 |
| ATG2B    | autophagy related 2B [Source:HGNC Symbol;Acc:HGNC:20187]                                 |
| ATG9A    | autophagy related 9A [Source:HGNC Symbol;Acc:HGNC:22408]                                 |
| ATG12    | autophagy related 12 [Source:HGNC Symbol;Acc:HGNC:588]                                   |
| ATG5     | autophagy related 5 [Source:HGNC Symbol;Acc:HGNC:589]                                    |
| ATG7     | autophagy related 7 [Source:HGNC Symbol;Acc:HGNC:16935]                                  |
| ATG10    | autophagy related 10 [Source:HGNC Symbol;Acc:HGNC:20315]                                 |
| GABARAP  | GABA type A receptor-associated protein [Source:HGNC Symbol;Acc:HGNC:4067]               |
| TBK1     | TANK binding kinase 1 [Source:HGNC Symbol;Acc:HGNC:11584]                                |
| OPTN     | optineurin [Source:HGNC Symbol;Acc:HGNC:17142]                                           |
| IL1B     | interleukin 1 beta [Source:HGNC Symbol;Acc:HGNC:5992]                                    |
| IL18     | interleukin 18 [Source:HGNC Symbol;Acc:HGNC:5986]                                        |
| CALCOCO2 | calcium binding and coiled-coil domain 2 [Source:HGNC Symbol;Acc:HGNC:29912]             |
| DDX58    | DEXD/H-box helicase 58 [Source:HGNC Symbol;Acc:HGNC:19102]                               |
| MAVS     | mitochondrial antiviral signaling protein [Source:HGNC Symbol;Acc:HGNC:29233]            |
| TFEB     | transcription factor EB [Source:HGNC Symbol;Acc:HGNC:11753]                              |
| TNF      | tumor necrosis factor [Source:HGNC Symbol;Acc:HGNC:11892]                                |
| CXCL10   | C-X-C motif chemokine ligand 10 [Source:HGNC Symbol;Acc:HGNC:10637]                      |
| CXCL11   | C-X-C motif chemokine ligand 11 [Source:HGNC Symbol;Acc:HGNC:10638]                      |
| IRF3     | interferon regulatory factor 3 [Source:HGNC Symbol;Acc:HGNC:6118]                        |
| CCL5     | C-C motif chemokine ligand 5 [Source:HGNC Symbol;Acc:HGNC:10632]                         |
| CCL2     | C-C motif chemokine ligand 2 [Source:HGNC Symbol;Acc:HGNC:10618]                         |
| BCL2L1   | BCL2 like 1 [Source:HGNC Symbol;Acc:HGNC:992]                                            |
| ARHGAP1  | Rho GTPase activating protein 1 [Source:HGNC Symbol;Acc:HGNC:673]                        |

|         |                                                                                        |
|---------|----------------------------------------------------------------------------------------|
| RHO     | rhodopsin [Source:HGNC Symbol;Acc:HGNC:10012]                                          |
| GPC1    | glypican 1 [Source:HGNC Symbol;Acc:HGNC:4449]                                          |
| RAB7A   | RAB7A, member RAS oncogene family [Source:HGNC Symbol;Acc:HGNC:9788]                   |
| HMBOX1  | homeobox containing 1 [Source:HGNC Symbol;Acc:HGNC:26137]                              |
| MT2A    | metallothionein 2A [Source:HGNC Symbol;Acc:HGNC:7406]                                  |
| SOX2    | SRY-box 2 [Source:HGNC Symbol;Acc:HGNC:11195]                                          |
| POU5F1  | POU class 5 homeobox 1 [Source:HGNC Symbol;Acc:HGNC:9221]                              |
| AMBRA1  | autophagy and beclin 1 regulator 1 [Source:HGNC Symbol;Acc:HGNC:25990]                 |
| GATA1   | GATA binding protein 1 [Source:HGNC Symbol;Acc:HGNC:4170]                              |
| FOXO3   | forkhead box O3 [Source:HGNC Symbol;Acc:HGNC:3821]                                     |
| FOXO4   | forkhead box O4 [Source:HGNC Symbol;Acc:HGNC:7139]                                     |
| CDKN2A  | cyclin dependent kinase inhibitor 2A [Source:HGNC Symbol;Acc:HGNC:1787]                |
| CDKN2B  | cyclin dependent kinase inhibitor 2B [Source:HGNC Symbol;Acc:HGNC:1788]                |
| CDKN1A  | cyclin dependent kinase inhibitor 1A [Source:HGNC Symbol;Acc:HGNC:1784]                |
| NOS3    | nitric oxide synthase 3 [Source:HGNC Symbol;Acc:HGNC:7876]                             |
| VWF     | von Willebrand factor [Source:HGNC Symbol;Acc:HGNC:12726]                              |
| PEG3    | paternally expressed 3 [Source:HGNC Symbol;Acc:HGNC:8826]                              |
| GRP     | gastrin releasing peptide [Source:HGNC Symbol;Acc:HGNC:4605]                           |
| GRPR    | gastrin releasing peptide receptor [Source:HGNC Symbol;Acc:HGNC:4609]                  |
| AGGF1   | angiogenic factor with G-patch and FHA domains 1 [Source:HGNC Symbol;Acc:HGNC:24684]   |
| HSPA5   | heat shock protein family A (Hsp70) member 5 [Source:HGNC Symbol;Acc:HGNC:5238]        |
| IDO1    | indoleamine 2,3-dioxygenase 1 [Source:HGNC Symbol;Acc:HGNC:6059]                       |
| KLF2    | Kruppel like factor 2 [Source:HGNC Symbol;Acc:HGNC:6347]                               |
| UVRAG   | UV radiation resistance associated [Source:HGNC Symbol;Acc:HGNC:12640]                 |
| MB21D1  | Mab-21 domain containing 1 [Source:HGNC Symbol;Acc:HGNC:21367]                         |
| CXCL9   | C-X-C motif chemokine ligand 9 [Source:HGNC Symbol;Acc:HGNC:7098]                      |
| NBR1    | NBR1, autophagy cargo receptor [Source:HGNC Symbol;Acc:HGNC:6746]                      |
| HAVCR2  | hepatitis A virus cellular receptor 2 [Source:HGNC Symbol;Acc:HGNC:18437]              |
| ATG9B   | autophagy related 9B [Source:HGNC Symbol;Acc:HGNC:21899]                               |
| ATG16L2 | autophagy related 16 like 2 [Source:HGNC Symbol;Acc:HGNC:25464]                        |
| ATG4A   | autophagy related 4A cysteine peptidase [Source:HGNC Symbol;Acc:HGNC:16489]            |
| ATG4B   | autophagy related 4B cysteine peptidase [Source:HGNC Symbol;Acc:HGNC:20790]            |
| ATG4C   | autophagy related 4C cysteine peptidase [Source:HGNC Symbol;Acc:HGNC:16040]            |
| ATG4D   | autophagy related 4D cysteine peptidase [Source:HGNC Symbol;Acc:HGNC:20789]            |
| ACTC1   | actin, alpha, cardiac muscle 1 [Source:HGNC Symbol;Acc:HGNC:143]                       |
| MYC     | v-myc avian myelocytomatosis viral oncogene homolog [Source:HGNC Symbol;Acc:HGNC:7553] |
| ATG3    | autophagy related 3 [Source:HGNC Symbol;Acc:HGNC:20962]                                |
| BEST1   | bestrophin 1 [Source:HGNC Symbol;Acc:HGNC:12703]                                       |
| AADAC   | arylacetamide deacetylase [Source:HGNC Symbol;Acc:HGNC:17]                             |
| TP53    | tumor protein p53 [Source:HGNC Symbol;Acc:HGNC:11998]                                  |
| P2RY2   | purinergic receptor P2Y2 [Source:HGNC Symbol;Acc:HGNC:8541]                            |

|         |                                                                                                               |
|---------|---------------------------------------------------------------------------------------------------------------|
| P2RX7   | purinergic receptor P2X 7 [Source:HGNC Symbol;Acc:HGNC:8537]                                                  |
| BCL10   | B-cell CLL/lymphoma 10 [Source:HGNC Symbol;Acc:HGNC:989]                                                      |
| NOD2    | nucleotide binding oligomerization domain containing 2 [Source:HGNC Symbol;Acc:HGNC:5331]                     |
| RPS13   | ribosomal protein S13 [Source:HGNC Symbol;Acc:HGNC:10386]                                                     |
| MDM2    | MDM2 proto-oncogene [Source:HGNC Symbol;Acc:HGNC:6973]                                                        |
| FUNDC1  | FUN14 domain containing 1 [Source:HGNC Symbol;Acc:HGNC:28746]                                                 |
| SPARC   | secreted protein acidic and cysteine rich [Source:HGNC Symbol;Acc:HGNC:11219]                                 |
| CD44    | CD44 molecule (Indian blood group) [Source:HGNC Symbol;Acc:HGNC:1681]                                         |
| BRAF    | B-Raf proto-oncogene, serine/threonine kinase [Source:HGNC Symbol;Acc:HGNC:1097]                              |
| SETD2   | SET domain containing 2 [Source:HGNC Symbol;Acc:HGNC:18420]                                                   |
| MYCL    | v-myc avian myelocytomatosis viral oncogene lung carcinoma derived homolog [Source:HGNC Symbol;Acc:HGNC:7555] |
| MYCN    | v-myc avian myelocytomatosis viral oncogene neuroblastoma derived homolog [Source:HGNC Symbol;Acc:HGNC:7559]  |
| ZBTB24  | zinc finger and BTB domain containing 24 [Source:HGNC Symbol;Acc:HGNC:21143]                                  |
| DAPK1   | death associated protein kinase 1 [Source:HGNC Symbol;Acc:HGNC:2674]                                          |
| DIRAS3  | DIRAS family GTPase 3 [Source:HGNC Symbol;Acc:HGNC:687]                                                       |
| DRAM1   | DNA damage regulated autophagy modulator 1 [Source:HGNC Symbol;Acc:HGNC:25645]                                |
| NF1     | neurofibromin 1 [Source:HGNC Symbol;Acc:HGNC:7765]                                                            |
| RB1     | RB transcriptional corepressor 1 [Source:HGNC Symbol;Acc:HGNC:9884]                                           |
| TSC1    | tuberous sclerosis 1 [Source:HGNC Symbol;Acc:HGNC:12362]                                                      |
| VHL     | von Hippel-Lindau tumor suppressor [Source:HGNC Symbol;Acc:HGNC:12687]                                        |
| TRPM3   | transient receptor potential cation channel subfamily M member 3 [Source:HGNC Symbol;Acc:HGNC:17992]          |
| BNIP3L  | BCL2/adenovirus E1B 19kDa interacting protein 3-like [Source:HGNC Symbol;Acc:HGNC:1085]                       |
| NAT2    | N-acetyltransferase 2 (arylamine N-acetyltransferase) [Source:HGNC Symbol;Acc:HGNC:7646]                      |
| BAD     | BCL2 associated agonist of cell death [Source:HGNC Symbol;Acc:HGNC:936]                                       |
| BRCA1   | BRCA1, DNA repair associated [Source:HGNC Symbol;Acc:HGNC:1100]                                               |
| WIP1    | WD repeat domain, phosphoinositide interacting 1 [Source:HGNC Symbol;Acc:HGNC:25471]                          |
| INS     | insulin [Source:HGNC Symbol;Acc:HGNC:6081]                                                                    |
| IGF1R   | insulin like growth factor 1 receptor [Source:HGNC Symbol;Acc:HGNC:5465]                                      |
| DDIT4   | DNA damage inducible transcript 4 [Source:HGNC Symbol;Acc:HGNC:24944]                                         |
| RHEB    | Ras homolog enriched in brain [Source:HGNC Symbol;Acc:HGNC:10011]                                             |
| ERN1    | endoplasmic reticulum to nucleus signaling 1 [Source:HGNC Symbol;Acc:HGNC:3449]                               |
| EIF2AK3 | eukaryotic translation initiation factor 2 alpha kinase 3 [Source:HGNC Symbol;Acc:HGNC:3255]                  |
| EIF2AK4 | eukaryotic translation initiation factor 2 alpha kinase 4 [Source:HGNC Symbol;Acc:HGNC:19687]                 |
| VAMP8   | vesicle associated membrane protein 8 [Source:HGNC Symbol;Acc:HGNC:12647]                                     |
| CTSD    | cathepsin D [Source:HGNC Symbol;Acc:HGNC:2529]                                                                |
| CTSB    | cathepsin B [Source:HGNC Symbol;Acc:HGNC:2527]                                                                |
| CTSL    | cathepsin L [Source:HGNC Symbol;Acc:HGNC:2537]                                                                |
| STX17   | syntaxin 17 [Source:HGNC Symbol;Acc:HGNC:11432]                                                               |
| SNAP29  | synaptosome associated protein 29 [Source:HGNC Symbol;Acc:HGNC:11133]                                         |

|          |                                                                                                              |
|----------|--------------------------------------------------------------------------------------------------------------|
| RAB33B   | RAB33B, member RAS oncogene family [Source:HGNC Symbol;Acc:HGNC:16075]                                       |
| RPTOR    | regulatory associated protein of MTOR complex 1 [Source:HGNC Symbol;Acc:HGNC:30287]                          |
| MTOR     | mechanistic target of rapamycin [Source:HGNC Symbol;Acc:HGNC:3942]                                           |
| MLST8    | MTOR associated protein, LST8 homolog [Source:HGNC Symbol;Acc:HGNC:24825]                                    |
| RPS6KB1  | ribosomal protein S6 kinase B1 [Source:HGNC Symbol;Acc:HGNC:10436]                                           |
| TRAF6    | TNF receptor associated factor 6 [Source:HGNC Symbol;Acc:HGNC:12036]                                         |
| VMP1     | vacuole membrane protein 1 [Source:HGNC Symbol;Acc:HGNC:29559]                                               |
| SUPT20H  | SPT20 homolog, SAGA complex component [Source:HGNC Symbol;Acc:HGNC:20596]                                    |
| RUBCN    | RUN and cysteine rich domain containing beclin 1 interacting protein [Source:HGNC Symbol;Acc:HGNC:28991]     |
| SH3GLB1  | SH3 domain containing GRB2 like endophilin B1 [Source:HGNC Symbol;Acc:HGNC:10833]                            |
| ZFYVE1   | zinc finger FYVE-type containing 1 [Source:HGNC Symbol;Acc:HGNC:13180]                                       |
| MTMR3    | myotubularin related protein 3 [Source:HGNC Symbol;Acc:HGNC:7451]                                            |
| CREB1    | cAMP responsive element binding protein 1 [Source:HGNC Symbol;Acc:HGNC:2345]                                 |
| EIF4EBP1 | eukaryotic translation initiation factor 4E binding protein 1 [Source:HGNC Symbol;Acc:HGNC:3288]             |
| KEAP1    | kelch like ECH associated protein 1 [Source:HGNC Symbol;Acc:HGNC:23177]                                      |
| NDRG1    | N-myc downstream regulated 1 [Source:HGNC Symbol;Acc:HGNC:7679]                                              |
| NFE2L2   | nuclear factor, erythroid 2 like 2 [Source:HGNC Symbol;Acc:HGNC:7782]                                        |
| PGAM5    | PGAM family member 5, mitochondrial serine/threonine protein phosphatase [Source:HGNC Symbol;Acc:HGNC:28763] |
| SQSTM1   | sequestosome 1 [Source:HGNC Symbol;Acc:HGNC:11280]                                                           |
| XIAP     | X-linked inhibitor of apoptosis [Source:HGNC Symbol;Acc:HGNC:592]                                            |
| SESN1    | sestrin 1 [Source:HGNC Symbol;Acc:HGNC:21595]                                                                |
| SESN2    | sestrin 2 [Source:HGNC Symbol;Acc:HGNC:20746]                                                                |
| PA2G4    | proliferation-associated 2G4 [Source:HGNC Symbol;Acc:HGNC:8550]                                              |
| ABL1     | ABL proto-oncogene 1, non-receptor tyrosine kinase [Source:HGNC Symbol;Acc:HGNC:76]                          |
| BCR      | BCR, RhoGEF and GTPase activating protein [Source:HGNC Symbol;Acc:HGNC:1014]                                 |
| DIRAS1   | DIRAS family GTPase 1 [Source:HGNC Symbol;Acc:HGNC:19127]                                                    |
| DIRAS2   | DIRAS family GTPase 2 [Source:HGNC Symbol;Acc:HGNC:19323]                                                    |
| PDPK1    | 3-phosphoinositide dependent protein kinase 1 [Source:HGNC Symbol;Acc:HGNC:8816]                             |
| EIF2A    | eukaryotic translation initiation factor 2A [Source:HGNC Symbol;Acc:HGNC:3254]                               |
| CAMKK2   | calcium/calmodulin dependent protein kinase kinase 2 [Source:HGNC Symbol;Acc:HGNC:1470]                      |
| E2F2     | E2F transcription factor 2 [Source:HGNC Symbol;Acc:HGNC:3114]                                                |
| E2F4     | E2F transcription factor 4 [Source:HGNC Symbol;Acc:HGNC:3118]                                                |
| E2F6     | E2F transcription factor 6 [Source:HGNC Symbol;Acc:HGNC:3120]                                                |
| TMEM173  | transmembrane protein 173 [Source:HGNC Symbol;Acc:HGNC:27962]                                                |
| PRAP1    | proline rich acidic protein 1 [Source:HGNC Symbol;Acc:HGNC:23304]                                            |
| ULK2     | unc-51 like autophagy activating kinase 2 [Source:HGNC Symbol;Acc:HGNC:13480]                                |
| SESN3    | sestrin 3 [Source:HGNC Symbol;Acc:HGNC:23060]                                                                |
| NRP2     | neuropilin 2 [Source:HGNC Symbol;Acc:HGNC:8005]                                                              |
| FUNDC2   | FUN14 domain containing 2 [Source:HGNC Symbol;Acc:HGNC:24925]                                                |

|          |                                                                                        |
|----------|----------------------------------------------------------------------------------------|
| RRAGB    | Ras related GTP binding B [Source:HGNC Symbol;Acc:HGNC:19901]                          |
| RRAGA    | Ras related GTP binding A [Source:HGNC Symbol;Acc:HGNC:16963]                          |
| RRAGC    | Ras related GTP binding C [Source:HGNC Symbol;Acc:HGNC:19902]                          |
| RRAGD    | Ras related GTP binding D [Source:HGNC Symbol;Acc:HGNC:19903]                          |
| LAMP3    | lysosomal associated membrane protein 3 [Source:HGNC Symbol;Acc:HGNC:14582]            |
| NR2C2    | nuclear receptor subfamily 2 group C member 2 [Source:HGNC Symbol;Acc:HGNC:7972]       |
| PRAM1    | PML-RARA regulated adaptor molecule 1 [Source:HGNC Symbol;Acc:HGNC:30091]              |
| SLC16A1  | solute carrier family 16 member 1 [Source:HGNC Symbol;Acc:HGNC:10922]                  |
| EGLN1    | egl-9 family hypoxia inducible factor 1 [Source:HGNC Symbol;Acc:HGNC:1232]             |
| SLC1A5   | solute carrier family 1 member 5 [Source:HGNC Symbol;Acc:HGNC:10943]                   |
| GFPT1    | glutamine--fructose-6-phosphate transaminase 1 [Source:HGNC Symbol;Acc:HGNC:4241]      |
| G6PD     | glucose-6-phosphate dehydrogenase [Source:HGNC Symbol;Acc:HGNC:4057]                   |
| SLC27A1  | solute carrier family 27 member 1 [Source:HGNC Symbol;Acc:HGNC:10995]                  |
| LDHA     | lactate dehydrogenase A [Source:HGNC Symbol;Acc:HGNC:6535]                             |
| SIRT3    | sirtuin 3 [Source:HGNC Symbol;Acc:HGNC:14931]                                          |
| SIRT6    | sirtuin 6 [Source:HGNC Symbol;Acc:HGNC:14934]                                          |
| IDH1     | isocitrate dehydrogenase (NADP(+)) 1, cytosolic [Source:HGNC Symbol;Acc:HGNC:5382]     |
| IDH2     | isocitrate dehydrogenase (NADP(+)) 2, mitochondrial [Source:HGNC Symbol;Acc:HGNC:5383] |
| ACADSB   | acyl-CoA dehydrogenase, short/branched chain [Source:HGNC Symbol;Acc:HGNC:91]          |
| APLN     | apelin [Source:HGNC Symbol;Acc:HGNC:16665]                                             |
| TOP2A    | topoisomerase (DNA) II alpha [Source:HGNC Symbol;Acc:HGNC:11989]                       |
| MKI67    | marker of proliferation Ki-67 [Source:HGNC Symbol;Acc:HGNC:7107]                       |
| KIT      | KIT proto-oncogene receptor tyrosine kinase [Source:HGNC Symbol;Acc:HGNC:6342]         |
| SLC2A3   | solute carrier family 2 member 3 [Source:HGNC Symbol;Acc:HGNC:11007]                   |
| GSK3B    | glycogen synthase kinase 3 beta [Source:HGNC Symbol;Acc:HGNC:4617]                     |
| ALDH18A1 | aldehyde dehydrogenase 18 family member A1 [Source:HGNC Symbol;Acc:HGNC:9722]          |
| SQLE     | squalene epoxidase [Source:HGNC Symbol;Acc:HGNC:11279]                                 |
| ALDOA    | aldolase, fructose-bisphosphate A [Source:HGNC Symbol;Acc:HGNC:414]                    |
| ALDOC    | aldolase, fructose-bisphosphate C [Source:HGNC Symbol;Acc:HGNC:418]                    |
| BMPR2    | bone morphogenetic protein receptor type 2 [Source:HGNC Symbol;Acc:HGNC:1078]          |
| CD36     | CD36 molecule [Source:HGNC Symbol;Acc:HGNC:1663]                                       |
| CPT1A    | carnitine palmitoyltransferase 1A [Source:HGNC Symbol;Acc:HGNC:2328]                   |
| DHFR     | dihydrofolate reductase [Source:HGNC Symbol;Acc:HGNC:2861]                             |
| ENO1     | enolase 1 [Source:HGNC Symbol;Acc:HGNC:3350]                                           |
| FABP4    | fatty acid binding protein 4 [Source:HGNC Symbol;Acc:HGNC:3559]                        |
| FFAR1    | free fatty acid receptor 1 [Source:HGNC Symbol;Acc:HGNC:4498]                          |
| FASN     | fatty acid synthase [Source:HGNC Symbol;Acc:HGNC:3594]                                 |
| GAPDH    | glyceraldehyde-3-phosphate dehydrogenase [Source:HGNC Symbol;Acc:HGNC:4141]            |
| GLS      | glutaminase [Source:HGNC Symbol;Acc:HGNC:4331]                                         |
| GCH1     | GTP cyclohydrolase 1 [Source:HGNC Symbol;Acc:HGNC:4193]                                |
| HK1      | hexokinase 1 [Source:HGNC Symbol;Acc:HGNC:4922]                                        |

|          |                                                                                         |
|----------|-----------------------------------------------------------------------------------------|
| HK2      | hexokinase 2 [Source:HGNC Symbol;Acc:HGNC:4923]                                         |
| IRS2     | insulin receptor substrate 2 [Source:HGNC Symbol;Acc:HGNC:6126]                         |
| LDHB     | lactate dehydrogenase B [Source:HGNC Symbol;Acc:HGNC:6541]                              |
| PARP1    | poly(ADP-ribose) polymerase 1 [Source:HGNC Symbol;Acc:HGNC:270]                         |
| PFKM     | phosphofructokinase, muscle [Source:HGNC Symbol;Acc:HGNC:8877]                          |
| PPARGC1A | PPARG coactivator 1 alpha [Source:HGNC Symbol;Acc:HGNC:9237]                            |
| PGK1     | phosphoglycerate kinase 1 [Source:HGNC Symbol;Acc:HGNC:8896]                            |
| EGLN3    | egl-9 family hypoxia inducible factor 3 [Source:HGNC Symbol;Acc:HGNC:14661]             |
| PKM      | pyruvate kinase, muscle [Source:HGNC Symbol;Acc:HGNC:9021]                              |
| PPARG    | peroxisome proliferator activated receptor gamma [Source:HGNC Symbol;Acc:HGNC:9236]     |
| SLC16A3  | solute carrier family 16 member 3 [Source:HGNC Symbol;Acc:HGNC:10924]                   |
| GPI      | glucose-6-phosphate isomerase [Source:HGNC Symbol;Acc:HGNC:4458]                        |
| PRRT2    | proline rich transmembrane protein 2 [Source:HGNC Symbol;Acc:HGNC:30500]                |
| PPARA    | peroxisome proliferator activated receptor alpha [Source:HGNC Symbol;Acc:HGNC:9232]     |
| PGK2     | phosphoglycerate kinase 2 [Source:HGNC Symbol;Acc:HGNC:8898]                            |
| CPT1B    | carnitine palmitoyltransferase 1B [Source:HGNC Symbol;Acc:HGNC:2329]                    |
| CPT1C    | carnitine palmitoyltransferase 1C [Source:HGNC Symbol;Acc:HGNC:18540]                   |
| PKD2     | pyruvate dehydrogenase kinase 2 [Source:HGNC Symbol;Acc:HGNC:8810]                      |
| PKD3     | pyruvate dehydrogenase kinase 3 [Source:HGNC Symbol;Acc:HGNC:8811]                      |
| PKD4     | pyruvate dehydrogenase kinase 4 [Source:HGNC Symbol;Acc:HGNC:8812]                      |
| PRMT1    | protein arginine methyltransferase 1 [Source:HGNC Symbol;Acc:HGNC:5187]                 |
| PRMT2    | protein arginine methyltransferase 2 [Source:HGNC Symbol;Acc:HGNC:5186]                 |
| PRMT3    | protein arginine methyltransferase 3 [Source:HGNC Symbol;Acc:HGNC:30163]                |
| CARM1    | coactivator associated arginine methyltransferase 1 [Source:HGNC Symbol;Acc:HGNC:23393] |
| PRMT5    | protein arginine methyltransferase 5 [Source:HGNC Symbol;Acc:HGNC:10894]                |
| PRMT6    | protein arginine methyltransferase 6 [Source:HGNC Symbol;Acc:HGNC:18241]                |
| PRMT7    | protein arginine methyltransferase 7 [Source:HGNC Symbol;Acc:HGNC:25557]                |
| PRMT8    | protein arginine methyltransferase 8 [Source:HGNC Symbol;Acc:HGNC:5188]                 |
| PRMT9    | protein arginine methyltransferase 9 [Source:HGNC Symbol;Acc:HGNC:25099]                |
| COQ10A   | coenzyme Q10A [Source:HGNC Symbol;Acc:HGNC:26515]                                       |
| COQ10B   | coenzyme Q10B [Source:HGNC Symbol;Acc:HGNC:25819]                                       |
| HK3      | hexokinase 3 [Source:HGNC Symbol;Acc:HGNC:4925]                                         |
| JMJD6    | arginine demethylase and lysine hydroxylase [Source:HGNC Symbol;Acc:HGNC:19355]         |
| MDH2     | malate dehydrogenase 2 [Source:HGNC Symbol;Acc:HGNC:6971]                               |
| SLC27A2  | solute carrier family 27 member 2 [Source:HGNC Symbol;Acc:HGNC:10996]                   |
| SLC27A3  | solute carrier family 27 member 3 [Source:HGNC Symbol;Acc:HGNC:10997]                   |
| SLC27A4  | solute carrier family 27 member 4 [Source:HGNC Symbol;Acc:HGNC:10998]                   |
| SLC27A5  | solute carrier family 27 member 5 [Source:HGNC Symbol;Acc:HGNC:10999]                   |
| SLC27A6  | solute carrier family 27 member 6 [Source:HGNC Symbol;Acc:HGNC:11000]                   |
| FABP1    | fatty acid binding protein 1 [Source:HGNC Symbol;Acc:HGNC:3555]                         |
| FABP2    | fatty acid binding protein 2 [Source:HGNC Symbol;Acc:HGNC:3556]                         |



|         |                                                                                            |
|---------|--------------------------------------------------------------------------------------------|
| FABP3   | fatty acid binding protein 3 [Source:HGNC Symbol;Acc:HGNC:3557]                            |
| FABP5   | fatty acid binding protein 5 [Source:HGNC Symbol;Acc:HGNC:3560]                            |
| FABP6   | fatty acid binding protein 6 [Source:HGNC Symbol;Acc:HGNC:3561]                            |
| FABP7   | fatty acid binding protein 7 [Source:HGNC Symbol;Acc:HGNC:3562]                            |
| PMP2    | peripheral myelin protein 2 [Source:HGNC Symbol;Acc:HGNC:9117]                             |
| FABP9   | fatty acid binding protein 9 [Source:HGNC Symbol;Acc:HGNC:3563]                            |
| FABP12  | fatty acid binding protein 12 [Source:HGNC Symbol;Acc:HGNC:34524]                          |
| SDHB    | succinate dehydrogenase complex iron sulfur subunit B [Source:HGNC Symbol;Acc:HGNC:10681]  |
| SDHA    | succinate dehydrogenase complex flavoprotein subunit A [Source:HGNC Symbol;Acc:HGNC:10680] |
| POLG    | polymerase (DNA) gamma, catalytic subunit [Source:HGNC Symbol;Acc:HGNC:9179]               |
| SLC16A4 | solute carrier family 16 member 4 [Source:HGNC Symbol;Acc:HGNC:10925]                      |
| GYS1    | glycogen synthase 1 [Source:HGNC Symbol;Acc:HGNC:4706]                                     |
| PYGB    | phosphorylase, glycogen; brain [Source:HGNC Symbol;Acc:HGNC:9723]                          |
| PYGL    | phosphorylase, glycogen, liver [Source:HGNC Symbol;Acc:HGNC:9725]                          |
| PYGM    | phosphorylase, glycogen, muscle [Source:HGNC Symbol;Acc:HGNC:9726]                         |
| LGALS1  | galectin 1 [Source:HGNC Symbol;Acc:HGNC:6561]                                              |
| CA1     | carbonic anhydrase 1 [Source:HGNC Symbol;Acc:HGNC:1368]                                    |
| EGLN2   | egl-9 family hypoxia inducible factor 2 [Source:HGNC Symbol;Acc:HGNC:14660]                |
| LDHC    | lactate dehydrogenase C [Source:HGNC Symbol;Acc:HGNC:6544]                                 |
| LDHD    | lactate dehydrogenase D [Source:HGNC Symbol;Acc:HGNC:19708]                                |
| ALDH1A1 | aldehyde dehydrogenase 1 family member A1 [Source:HGNC Symbol;Acc:HGNC:402]                |
| CA10    | carbonic anhydrase 10 [Source:HGNC Symbol;Acc:HGNC:1369]                                   |
| CA11    | carbonic anhydrase 11 [Source:HGNC Symbol;Acc:HGNC:1370]                                   |
| CA12    | carbonic anhydrase 12 [Source:HGNC Symbol;Acc:HGNC:1371]                                   |
| CA9     | carbonic anhydrase 9 [Source:HGNC Symbol;Acc:HGNC:1383]                                    |
| CA8     | carbonic anhydrase 8 [Source:HGNC Symbol;Acc:HGNC:1382]                                    |
| CA7     | carbonic anhydrase 7 [Source:HGNC Symbol;Acc:HGNC:1381]                                    |
| CA6     | carbonic anhydrase 6 [Source:HGNC Symbol;Acc:HGNC:1380]                                    |
| CA5B    | carbonic anhydrase 5B [Source:HGNC Symbol;Acc:HGNC:1378]                                   |
| CA5A    | carbonic anhydrase 5A [Source:HGNC Symbol;Acc:HGNC:1377]                                   |
| CA13    | carbonic anhydrase 13 [Source:HGNC Symbol;Acc:HGNC:14914]                                  |
| CA14    | carbonic anhydrase 14 [Source:HGNC Symbol;Acc:HGNC:1372]                                   |
| CA2     | carbonic anhydrase 2 [Source:HGNC Symbol;Acc:HGNC:1373]                                    |
| CA3     | carbonic anhydrase 3 [Source:HGNC Symbol;Acc:HGNC:1374]                                    |
| CA4     | carbonic anhydrase 4 [Source:HGNC Symbol;Acc:HGNC:1375]                                    |
| PHGDH   | phosphoglycerate dehydrogenase [Source:HGNC Symbol;Acc:HGNC:8923]                          |
| FAHD1   | fumarylacetoacetate hydrolase domain containing 1 [Source:HGNC Symbol;Acc:HGNC:14169]      |
| PROX1   | prospero homeobox 1 [Source:HGNC Symbol;Acc:HGNC:9459]                                     |
| EP300   | E1A binding protein p300 [Source:HGNC Symbol;Acc:HGNC:3373]                                |
| RHOJ    | ras homolog family member J [Source:HGNC Symbol;Acc:HGNC:688]                              |

|        |                                                                                                              |
|--------|--------------------------------------------------------------------------------------------------------------|
| UQCRCQ | ubiquinol-cytochrome c reductase complex III subunit VII [Source:HGNC Symbol;Acc:HGNC:29594]                 |
| P2RY1  | purinergic receptor P2Y1 [Source:HGNC Symbol;Acc:HGNC:8539]                                                  |
| DDAH1  | dimethylarginine dimethylaminohydrolase 1 [Source:HGNC Symbol;Acc:HGNC:2715]                                 |
| CYBB   | cytochrome b-245 beta chain [Source:HGNC Symbol;Acc:HGNC:2578]                                               |
| SLC2A4 | solute carrier family 2 member 4 [Source:HGNC Symbol;Acc:HGNC:11009]                                         |
| FLT4   | fms related tyrosine kinase 4 [Source:HGNC Symbol;Acc:HGNC:3767]                                             |
| NRP1   | neuropilin 1 [Source:HGNC Symbol;Acc:HGNC:8004]                                                              |
| FOXO6  | forkhead box O6 [Source:HGNC Symbol;Acc:HGNC:24814]                                                          |
| GLS2   | glutaminase 2 [Source:HGNC Symbol;Acc:HGNC:29570]                                                            |
| IL17A  | interleukin 17A [Source:HGNC Symbol;Acc:HGNC:5981]                                                           |
| FXN    | frataxin [Source:HGNC Symbol;Acc:HGNC:3951]                                                                  |
| MAGEE1 | MAGE family member E1 [Source:HGNC Symbol;Acc:HGNC:24934]                                                    |
| CXCL1  | C-X-C motif chemokine ligand 1 [Source:HGNC Symbol;Acc:HGNC:4602]                                            |
| FLT1   | fms related tyrosine kinase 1 [Source:HGNC Symbol;Acc:HGNC:3763]                                             |
| GCNT2  | glucosaminyl (N-acetyl) transferase 2, I-branching enzyme (I blood group) [Source:HGNC Symbol;Acc:HGNC:4204] |
| SLC7A1 | solute carrier family 7 member 1 [Source:HGNC Symbol;Acc:HGNC:11057]                                         |
| ASS1   | argininosuccinate synthase 1 [Source:HGNC Symbol;Acc:HGNC:758]                                               |
| ASL    | argininosuccinate lyase [Source:HGNC Symbol;Acc:HGNC:746]                                                    |
| NOX4   | NADPH oxidase 4 [Source:HGNC Symbol;Acc:HGNC:7891]                                                           |
| NOX5   | NADPH oxidase, EF-hand calcium binding domain 5 [Source:HGNC Symbol;Acc:HGNC:14874]                          |
| ACSM3  | acyl-CoA synthetase medium-chain family member 3 [Source:HGNC Symbol;Acc:HGNC:10522]                         |
| GLO1   | glyoxalase I [Source:HGNC Symbol;Acc:HGNC:4323]                                                              |
| GLRX2  | glutaredoxin 2 [Source:HGNC Symbol;Acc:HGNC:16065]                                                           |
| ASNS   | asparagine synthetase (glutamine-hydrolyzing) [Source:HGNC Symbol;Acc:HGNC:753]                              |
| ATF4   | activating transcription factor 4 [Source:HGNC Symbol;Acc:HGNC:786]                                          |
| CAT    | catalase [Source:HGNC Symbol;Acc:HGNC:1516]                                                                  |
| CBS    | cystathionine-beta-synthase [Source:HGNC Symbol;Acc:HGNC:1550]                                               |
| DHODH  | dihydroorotate dehydrogenase (quinone) [Source:HGNC Symbol;Acc:HGNC:2867]                                    |
| FAS    | Fas cell surface death receptor [Source:HGNC Symbol;Acc:HGNC:11920]                                          |
| GAD1   | glutamate decarboxylase 1 [Source:HGNC Symbol;Acc:HGNC:4092]                                                 |
| RNF130 | ring finger protein 130 [Source:HGNC Symbol;Acc:HGNC:18280]                                                  |
| GPX3   | glutathione peroxidase 3 [Source:HGNC Symbol;Acc:HGNC:4555]                                                  |
| LPL    | lipoprotein lipase [Source:HGNC Symbol;Acc:HGNC:6677]                                                        |
| MTHFR  | methylenetetrahydrofolate reductase (NAD(P)H) [Source:HGNC Symbol;Acc:HGNC:7436]                             |
| NDRG3  | NDRG family member 3 [Source:HGNC Symbol;Acc:HGNC:14462]                                                     |
| OXCT1  | 3-oxoacid CoA-transferase 1 [Source:HGNC Symbol;Acc:HGNC:8527]                                               |
| PC     | pyruvate carboxylase [Source:HGNC Symbol;Acc:HGNC:8636]                                                      |
| PDP1   | pyruvate dehydrogenase phosphatase catalytic subunit 1 [Source:HGNC Symbol;Acc:HGNC:9279]                    |
| PLPP3  | phospholipid phosphatase 3 [Source:HGNC Symbol;Acc:HGNC:9229]                                                |
| PRDX1  | peroxiredoxin 1 [Source:HGNC Symbol;Acc:HGNC:9352]                                                           |

|         |                                                                                                           |
|---------|-----------------------------------------------------------------------------------------------------------|
| AHCY    | adenosylhomocysteinase [Source:HGNC Symbol;Acc:HGNC:343]                                                  |
| SORD    | sorbitol dehydrogenase [Source:HGNC Symbol;Acc:HGNC:11184]                                                |
| TKT     | transketolase [Source:HGNC Symbol;Acc:HGNC:11834]                                                         |
| UBIAD1  | UbiA prenyltransferase domain containing 1 [Source:HGNC Symbol;Acc:HGNC:30791]                            |
| SLC35A2 | solute carrier family 35 member A2 [Source:HGNC Symbol;Acc:HGNC:11022]                                    |
| ACACA   | acetyl-CoA carboxylase alpha [Source:HGNC Symbol;Acc:HGNC:84]                                             |
| JMJD8   | jumonji domain containing 8 [Source:HGNC Symbol;Acc:HGNC:14148]                                           |
| NOX1    | NADPH oxidase 1 [Source:HGNC Symbol;Acc:HGNC:7889]                                                        |
| FGFR1   | fibroblast growth factor receptor 1 [Source:HGNC Symbol;Acc:HGNC:3688]                                    |
| FGFR3   | fibroblast growth factor receptor 3 [Source:HGNC Symbol;Acc:HGNC:3690]                                    |
| VEGFB   | vascular endothelial growth factor B [Source:HGNC Symbol;Acc:HGNC:12681]                                  |
| KLK15   | kallikrein related peptidase 15 [Source:HGNC Symbol;Acc:HGNC:20453]                                       |
| SCD     | stearoyl-CoA desaturase [Source:HGNC Symbol;Acc:HGNC:10571]                                               |
| SLC2A2  | solute carrier family 2 member 2 [Source:HGNC Symbol;Acc:HGNC:11006]                                      |
| SLC2A5  | solute carrier family 2 member 5 [Source:HGNC Symbol;Acc:HGNC:11010]                                      |
| SLC2A6  | solute carrier family 2 member 6 [Source:HGNC Symbol;Acc:HGNC:11011]                                      |
| SLC2A7  | solute carrier family 2 member 7 [Source:HGNC Symbol;Acc:HGNC:13445]                                      |
| SLC2A9  | solute carrier family 2 member 9 [Source:HGNC Symbol;Acc:HGNC:13446]                                      |
| SLC2A8  | solute carrier family 2 member 8 [Source:HGNC Symbol;Acc:HGNC:13812]                                      |
| SLC2A11 | solute carrier family 2 member 11 [Source:HGNC Symbol;Acc:HGNC:14239]                                     |
| SLC2A12 | solute carrier family 2 member 12 [Source:HGNC Symbol;Acc:HGNC:18067]                                     |
| SLC2A14 | solute carrier family 2 member 14 [Source:HGNC Symbol;Acc:HGNC:18301]                                     |
| ACO2    | aconitase 2 [Source:HGNC Symbol;Acc:HGNC:118]                                                             |
| RBPJ    | recombination signal binding protein for immunoglobulin kappa J region [Source:HGNC Symbol;Acc:HGNC:5724] |
| ARG1    | arginase 1 [Source:HGNC Symbol;Acc:HGNC:663]                                                              |
| APOA1   | apolipoprotein A1 [Source:HGNC Symbol;Acc:HGNC:600]                                                       |
| GABPA   | GA binding protein transcription factor alpha subunit [Source:HGNC Symbol;Acc:HGNC:4071]                  |
| NFE2    | nuclear factor, erythroid 2 [Source:HGNC Symbol;Acc:HGNC:7780]                                            |
| ICAM4   | intercellular adhesion molecule 4 (Landsteiner-Wiener blood group) [Source:HGNC Symbol;Acc:HGNC:5347]     |
| ICAM5   | intercellular adhesion molecule 5 [Source:HGNC Symbol;Acc:HGNC:5348]                                      |
| FGF1    | fibroblast growth factor 1 [Source:HGNC Symbol;Acc:HGNC:3665]                                             |
| SLC7A5  | solute carrier family 7 member 5 [Source:HGNC Symbol;Acc:HGNC:11063]                                      |
| XBP1    | X-box binding protein 1 [Source:HGNC Symbol;Acc:HGNC:12801]                                               |
| BCL2L13 | BCL2 like 13 [Source:HGNC Symbol;Acc:HGNC:17164]                                                          |
| TOMM7   | translocase of outer mitochondrial membrane 7 [Source:HGNC Symbol;Acc:HGNC:21648]                         |
| UBA52   | ubiquitin A-52 residue ribosomal protein fusion product 1 [Source:HGNC Symbol;Acc:HGNC:12458]             |
| RPS27A  | ribosomal protein S27a [Source:HGNC Symbol;Acc:HGNC:10417]                                                |
| UBB     | ubiquitin B [Source:HGNC Symbol;Acc:HGNC:12463]                                                           |
| UBC     | ubiquitin C [Source:HGNC Symbol;Acc:HGNC:12468]                                                           |

|           |                                                                                                                    |
|-----------|--------------------------------------------------------------------------------------------------------------------|
| MFN1      | mitofusin 1 [Source:HGNC Symbol;Acc:HGNC:18262]                                                                    |
| MFN2      | mitofusin 2 [Source:HGNC Symbol;Acc:HGNC:16877]                                                                    |
| RHOT1     | ras homolog family member T1 [Source:HGNC Symbol;Acc:HGNC:21168]                                                   |
| RHOT2     | ras homolog family member T2 [Source:HGNC Symbol;Acc:HGNC:21169]                                                   |
| USP8      | ubiquitin specific peptidase 8 [Source:HGNC Symbol;Acc:HGNC:12631]                                                 |
| USP15     | ubiquitin specific peptidase 15 [Source:HGNC Symbol;Acc:HGNC:12613]                                                |
| USP30     | ubiquitin specific peptidase 30 [Source:HGNC Symbol;Acc:HGNC:20065]                                                |
| TAX1BP1   | Tax1 binding protein 1 [Source:HGNC Symbol;Acc:HGNC:11575]                                                         |
| MAP1LC3B2 | microtubule associated protein 1 light chain 3 beta 2 [Source:HGNC Symbol;Acc:HGNC:34390]                          |
| MITF      | melanogenesis associated transcription factor [Source:HGNC Symbol;Acc:HGNC:7105]                                   |
| TFE3      | transcription factor binding to IGHM enhancer 3 [Source:HGNC Symbol;Acc:HGNC:11752]                                |
| BECN2     | beclin 2 [Source:HGNC Symbol;Acc:HGNC:38606]                                                                       |
| CSNK2A1   | casein kinase 2 alpha 1 [Source:HGNC Symbol;Acc:HGNC:2457]                                                         |
| CSNK2A2   | casein kinase 2 alpha 2 [Source:HGNC Symbol;Acc:HGNC:2459]                                                         |
| CSNK2A3   | casein kinase 2 alpha 3 [Source:HGNC Symbol;Acc:HGNC:2458]                                                         |
| CSNK2B    | casein kinase 2 beta [Source:HGNC Symbol;Acc:HGNC:2460]                                                            |
| E2F1      | E2F transcription factor 1 [Source:HGNC Symbol;Acc:HGNC:3113]                                                      |
| RELA      | RELA proto-oncogene, NF-kB subunit [Source:HGNC Symbol;Acc:HGNC:9955]                                              |
| MRAS      | muscle RAS oncogene homolog [Source:HGNC Symbol;Acc:HGNC:7227]                                                     |
| RRAS      | related RAS viral (r-ras) oncogene homolog [Source:HGNC Symbol;Acc:HGNC:10447]                                     |
| RRAS2     | related RAS viral (r-ras) oncogene homolog 2 [Source:HGNC Symbol;Acc:HGNC:17271]                                   |
| CITED2    | Cbp/p300 interacting transactivator with Glu/Asp rich carboxy-terminal domain 2 [Source:HGNC Symbol;Acc:HGNC:1987] |
| SP1       | Sp1 transcription factor [Source:HGNC Symbol;Acc:HGNC:11205]                                                       |
| TBC1D15   | TBC1 domain family member 15 [Source:HGNC Symbol;Acc:HGNC:25694]                                                   |
| TBC1D17   | TBC1 domain family member 17 [Source:HGNC Symbol;Acc:HGNC:25699]                                                   |
| RAB7B     | RAB7B, member RAS oncogene family [Source:HGNC Symbol;Acc:HGNC:30513]                                              |
| FIS1      | fission, mitochondrial 1 [Source:HGNC Symbol;Acc:HGNC:21689]                                                       |
| ZEB2      | zinc finger E-box binding homeobox 2 [Source:HGNC Symbol;Acc:HGNC:14881]                                           |
| ILK       | integrin linked kinase [Source:HGNC Symbol;Acc:HGNC:6040]                                                          |
| ZEB1      | zinc finger E-box binding homeobox 1 [Source:HGNC Symbol;Acc:HGNC:11642]                                           |
| TWIST1    | twist family bHLH transcription factor 1 [Source:HGNC Symbol;Acc:HGNC:12428]                                       |
| SNAI2     | snail family transcriptional repressor 2 [Source:HGNC Symbol;Acc:HGNC:11094]                                       |
| EPAS1     | endothelial PAS domain protein 1 [Source:HGNC Symbol;Acc:HGNC:3374]                                                |
| SNAI1     | snail family transcriptional repressor 1 [Source:HGNC Symbol;Acc:HGNC:11128]                                       |
| MET       | MET proto-oncogene, receptor tyrosine kinase [Source:HGNC Symbol;Acc:HGNC:7029]                                    |
| IRS1      | insulin receptor substrate 1 [Source:HGNC Symbol;Acc:HGNC:6125]                                                    |
| IRS4      | insulin receptor substrate 4 [Source:HGNC Symbol;Acc:HGNC:6128]                                                    |
| PIK3CD    | phosphatidylinositol-4,5-bisphosphate 3-kinase catalytic subunit delta [Source:HGNC Symbol;Acc:HGNC:8977]          |
| PIK3CB    | phosphatidylinositol-4,5-bisphosphate 3-kinase catalytic subunit beta [Source:HGNC Symbol;Acc:HGNC:8976]           |

|          |                                                                                             |
|----------|---------------------------------------------------------------------------------------------|
| PIK3R1   | phosphoinositide-3-kinase regulatory subunit 1 [Source:HGNC Symbol;Acc:HGNC:8979]           |
| PIK3R2   | phosphoinositide-3-kinase regulatory subunit 2 [Source:HGNC Symbol;Acc:HGNC:8980]           |
| PIK3R3   | phosphoinositide-3-kinase regulatory subunit 3 [Source:HGNC Symbol;Acc:HGNC:8981]           |
| AKT2     | AKT serine/threonine kinase 2 [Source:HGNC Symbol;Acc:HGNC:392]                             |
| AKT3     | AKT serine/threonine kinase 3 [Source:HGNC Symbol;Acc:HGNC:393]                             |
| DEPTOR   | DEP domain containing MTOR-interacting protein [Source:HGNC Symbol;Acc:HGNC:22953]          |
| AKT1S1   | AKT1 substrate 1 [Source:HGNC Symbol;Acc:HGNC:28426]                                        |
| RPS6KB2  | ribosomal protein S6 kinase B2 [Source:HGNC Symbol;Acc:HGNC:10437]                          |
| IGBP1    | immunoglobulin (CD79A) binding protein 1 [Source:HGNC Symbol;Acc:HGNC:5461]                 |
| WIPI2    | WD repeat domain, phosphoinositide interacting 2 [Source:HGNC Symbol;Acc:HGNC:32225]        |
| SMCR8    | Smith-Magenis syndrome chromosome region, candidate 8 [Source:HGNC Symbol;Acc:HGNC:17921]   |
| WDR41    | WD repeat domain 41 [Source:HGNC Symbol;Acc:HGNC:25601]                                     |
| C9orf72  | chromosome 9 open reading frame 72 [Source:HGNC Symbol;Acc:HGNC:28337]                      |
| RAB39B   | RAB39B, member RAS oncogene family [Source:HGNC Symbol;Acc:HGNC:16499]                      |
| RAB1A    | RAB1A, member RAS oncogene family [Source:HGNC Symbol;Acc:HGNC:9758]                        |
| PRKCD    | protein kinase C delta [Source:HGNC Symbol;Acc:HGNC:9399]                                   |
| TP53INP2 | tumor protein p53 inducible nuclear protein 2 [Source:HGNC Symbol;Acc:HGNC:16104]           |
| MAP3K7   | mitogen-activated protein kinase kinase kinase 7 [Source:HGNC Symbol;Acc:HGNC:6859]         |
| DAPK3    | death associated protein kinase 3 [Source:HGNC Symbol;Acc:HGNC:2676]                        |
| DAPK2    | death associated protein kinase 2 [Source:HGNC Symbol;Acc:HGNC:2675]                        |
| EIF2S1   | eukaryotic translation initiation factor 2 subunit alpha [Source:HGNC Symbol;Acc:HGNC:3265] |
| MTMR4    | myotubularin related protein 4 [Source:HGNC Symbol;Acc:HGNC:7452]                           |
| MTMR14   | myotubularin related protein 14 [Source:HGNC Symbol;Acc:HGNC:26190]                         |
| CFLAR    | CASP8 and FADD like apoptosis regulator [Source:HGNC Symbol;Acc:HGNC:1876]                  |
| PRKCQ    | protein kinase C theta [Source:HGNC Symbol;Acc:HGNC:9410]                                   |
| LPAR2    | lysophosphatidic acid receptor 2 [Source:HGNC Symbol;Acc:HGNC:3168]                         |
| LPAR4    | lysophosphatidic acid receptor 4 [Source:HGNC Symbol;Acc:HGNC:4478]                         |
| LPAR5    | lysophosphatidic acid receptor 5 [Source:HGNC Symbol;Acc:HGNC:13307]                        |
| CXCL12   | C-X-C motif chemokine ligand 12 [Source:HGNC Symbol;Acc:HGNC:10672]                         |
| CXCR4    | C-X-C motif chemokine receptor 4 [Source:HGNC Symbol;Acc:HGNC:2561]                         |
| F2       | coagulation factor II, thrombin [Source:HGNC Symbol;Acc:HGNC:3535]                          |
| F2R      | coagulation factor II thrombin receptor [Source:HGNC Symbol;Acc:HGNC:3537]                  |
| FGF2     | fibroblast growth factor 2 [Source:HGNC Symbol;Acc:HGNC:3676]                               |
| FGF3     | fibroblast growth factor 3 [Source:HGNC Symbol;Acc:HGNC:3681]                               |
| FGF4     | fibroblast growth factor 4 [Source:HGNC Symbol;Acc:HGNC:3682]                               |
| FGF17    | fibroblast growth factor 17 [Source:HGNC Symbol;Acc:HGNC:3673]                              |
| FGF6     | fibroblast growth factor 6 [Source:HGNC Symbol;Acc:HGNC:3684]                               |
| FGF7     | fibroblast growth factor 7 [Source:HGNC Symbol;Acc:HGNC:3685]                               |
| FGF8     | fibroblast growth factor 8 [Source:HGNC Symbol;Acc:HGNC:3686]                               |
| FGF9     | fibroblast growth factor 9 [Source:HGNC Symbol;Acc:HGNC:3687]                               |
| FGF10    | fibroblast growth factor 10 [Source:HGNC Symbol;Acc:HGNC:3666]                              |

|         |                                                                                         |
|---------|-----------------------------------------------------------------------------------------|
| FGF16   | fibroblast growth factor 16 [Source:HGNC Symbol;Acc:HGNC:3672]                          |
| FGF5    | fibroblast growth factor 5 [Source:HGNC Symbol;Acc:HGNC:3683]                           |
| FGF18   | fibroblast growth factor 18 [Source:HGNC Symbol;Acc:HGNC:3674]                          |
| FGF20   | fibroblast growth factor 20 [Source:HGNC Symbol;Acc:HGNC:3677]                          |
| FGF22   | fibroblast growth factor 22 [Source:HGNC Symbol;Acc:HGNC:3679]                          |
| FGF19   | fibroblast growth factor 19 [Source:HGNC Symbol;Acc:HGNC:3675]                          |
| FGF21   | fibroblast growth factor 21 [Source:HGNC Symbol;Acc:HGNC:3678]                          |
| FGF23   | fibroblast growth factor 23 [Source:HGNC Symbol;Acc:HGNC:3680]                          |
| INSRR   | insulin receptor related receptor [Source:HGNC Symbol;Acc:HGNC:6093]                    |
| FGFR2   | fibroblast growth factor receptor 2 [Source:HGNC Symbol;Acc:HGNC:3689]                  |
| FGFR4   | fibroblast growth factor receptor 4 [Source:HGNC Symbol;Acc:HGNC:3691]                  |
| FN1     | fibronectin 1 [Source:HGNC Symbol;Acc:HGNC:3778]                                        |
| ITGA1   | integrin subunit alpha 1 [Source:HGNC Symbol;Acc:HGNC:6134]                             |
| ITGA3   | integrin subunit alpha 3 [Source:HGNC Symbol;Acc:HGNC:6139]                             |
| ITGA7   | integrin subunit alpha 7 [Source:HGNC Symbol;Acc:HGNC:6143]                             |
| ITGA10  | integrin subunit alpha 10 [Source:HGNC Symbol;Acc:HGNC:6135]                            |
| ITGA11  | integrin subunit alpha 11 [Source:HGNC Symbol;Acc:HGNC:6136]                            |
| ITGAX   | integrin subunit alpha X [Source:HGNC Symbol;Acc:HGNC:6152]                             |
| ITGAD   | integrin subunit alpha D [Source:HGNC Symbol;Acc:HGNC:6146]                             |
| ITGAE   | integrin subunit alpha E [Source:HGNC Symbol;Acc:HGNC:6147]                             |
| ITGB4   | integrin subunit beta 4 [Source:HGNC Symbol;Acc:HGNC:6158]                              |
| ITGB6   | integrin subunit beta 6 [Source:HGNC Symbol;Acc:HGNC:6161]                              |
| KNG1    | kininogen 1 [Source:HGNC Symbol;Acc:HGNC:6383]                                          |
| BDKRB1  | bradykinin receptor B1 [Source:HGNC Symbol;Acc:HGNC:1029]                               |
| BDKRB2  | bradykinin receptor B2 [Source:HGNC Symbol;Acc:HGNC:1030]                               |
| CHRM1   | cholinergic receptor muscarinic 1 [Source:HGNC Symbol;Acc:HGNC:1950]                    |
| CHRM2   | cholinergic receptor muscarinic 2 [Source:HGNC Symbol;Acc:HGNC:1951]                    |
| CHRM3   | cholinergic receptor muscarinic 3 [Source:HGNC Symbol;Acc:HGNC:1952]                    |
| CHRM4   | cholinergic receptor muscarinic 4 [Source:HGNC Symbol;Acc:HGNC:1953]                    |
| CHRM5   | cholinergic receptor muscarinic 5 [Source:HGNC Symbol;Acc:HGNC:1954]                    |
| GNA12   | G protein subunit alpha 12 [Source:HGNC Symbol;Acc:HGNC:4380]                           |
| GNA13   | G protein subunit alpha 13 [Source:HGNC Symbol;Acc:HGNC:4381]                           |
| GNG12   | G protein subunit gamma 12 [Source:HGNC Symbol;Acc:HGNC:19663]                          |
| FGD1    | FYVE, RhoGEF and PH domain containing 1 [Source:HGNC Symbol;Acc:HGNC:3663]              |
| FGD3    | FYVE, RhoGEF and PH domain containing 3 [Source:HGNC Symbol;Acc:HGNC:16027]             |
| PTK2    | protein tyrosine kinase 2 [Source:HGNC Symbol;Acc:HGNC:9611]                            |
| BCAR1   | BCAR1, Cas family scaffolding protein [Source:HGNC Symbol;Acc:HGNC:971]                 |
| CRK     | v-crk avian sarcoma virus CT10 oncogene homolog [Source:HGNC Symbol;Acc:HGNC:2362]      |
| CRKL    | v-crk avian sarcoma virus CT10 oncogene homolog-like [Source:HGNC Symbol;Acc:HGNC:2363] |
| DOCK1   | dedicator of cytokinesis 1 [Source:HGNC Symbol;Acc:HGNC:2987]                           |
| ARHGEF6 | Rac/Cdc42 guanine nucleotide exchange factor 6 [Source:HGNC Symbol;Acc:HGNC:685]        |

|            |                                                                                                                            |
|------------|----------------------------------------------------------------------------------------------------------------------------|
| VAV3       | vav guanine nucleotide exchange factor 3 [Source:HGNC Symbol;Acc:HGNC:12659]                                               |
| VAV1       | vav guanine nucleotide exchange factor 1 [Source:HGNC Symbol;Acc:HGNC:12657]                                               |
| VAV2       | vav guanine nucleotide exchange factor 2 [Source:HGNC Symbol;Acc:HGNC:12658]                                               |
| ARAF       | A-Raf proto-oncogene, serine/threonine kinase [Source:HGNC Symbol;Acc:HGNC:646]                                            |
| MOS        | v-mos Moloney murine sarcoma viral oncogene homolog [Source:HGNC Symbol;Acc:HGNC:7199]                                     |
| ARHGEF1    | Rho guanine nucleotide exchange factor 1 [Source:HGNC Symbol;Acc:HGNC:681]                                                 |
| ARHGEF12   | Rho guanine nucleotide exchange factor 12 [Source:HGNC Symbol;Acc:HGNC:14193]                                              |
| ARHGAP35   | Rho GTPase activating protein 35 [Source:HGNC Symbol;Acc:HGNC:4591]                                                        |
| RAC2       | ras-related C3 botulinum toxin substrate 2 (rho family, small GTP binding protein Rac2) [Source:HGNC Symbol;Acc:HGNC:9802] |
| RAC3       | ras-related C3 botulinum toxin substrate 3 (rho family, small GTP binding protein Rac3) [Source:HGNC Symbol;Acc:HGNC:9803] |
| PAK1       | p21 (RAC1) activated kinase 1 [Source:HGNC Symbol;Acc:HGNC:8590]                                                           |
| PAK2       | p21 (RAC1) activated kinase 2 [Source:HGNC Symbol;Acc:HGNC:8591]                                                           |
| PAK3       | p21 (RAC1) activated kinase 3 [Source:HGNC Symbol;Acc:HGNC:8592]                                                           |
| PAK4       | p21 (RAC1) activated kinase 4 [Source:HGNC Symbol;Acc:HGNC:16059]                                                          |
| PAK5       | p21 (RAC1) activated kinase 5 [Source:HGNC Symbol;Acc:HGNC:15916]                                                          |
| PAK6       | p21 (RAC1) activated kinase 6 [Source:HGNC Symbol;Acc:HGNC:16061]                                                          |
| BUB1B-PAK6 | BUB1B-PAK6 readthrough [Source:EntrezGene;Acc:106821730]                                                                   |
| ARHGEF7    | Rho guanine nucleotide exchange factor 7 [Source:HGNC Symbol;Acc:HGNC:15607]                                               |
| GIT1       | GIT ArfGAP 1 [Source:HGNC Symbol;Acc:HGNC:4272]                                                                            |
| MYLK       | myosin light chain kinase [Source:HGNC Symbol;Acc:HGNC:7590]                                                               |
| MYLK2      | myosin light chain kinase 2 [Source:HGNC Symbol;Acc:HGNC:16243]                                                            |
| MYLK3      | myosin light chain kinase 3 [Source:HGNC Symbol;Acc:HGNC:29826]                                                            |
| MYLK4      | myosin light chain kinase family member 4 [Source:HGNC Symbol;Acc:HGNC:27972]                                              |
| PPP1CA     | protein phosphatase 1 catalytic subunit alpha [Source:HGNC Symbol;Acc:HGNC:9281]                                           |
| PPP1CB     | protein phosphatase 1 catalytic subunit beta [Source:HGNC Symbol;Acc:HGNC:9282]                                            |
| PPP1CC     | protein phosphatase 1 catalytic subunit gamma [Source:HGNC Symbol;Acc:HGNC:9283]                                           |
| PPP1R12A   | protein phosphatase 1 regulatory subunit 12A [Source:HGNC Symbol;Acc:HGNC:7618]                                            |
| PPP1R12B   | protein phosphatase 1 regulatory subunit 12B [Source:HGNC Symbol;Acc:HGNC:7619]                                            |
| PPP1R12C   | protein phosphatase 1 regulatory subunit 12C [Source:HGNC Symbol;Acc:HGNC:14947]                                           |
| MYL5       | myosin light chain 5 [Source:HGNC Symbol;Acc:HGNC:7586]                                                                    |
| MYL7       | myosin light chain 7 [Source:HGNC Symbol;Acc:HGNC:21719]                                                                   |
| MYL10      | myosin light chain 10 [Source:HGNC Symbol;Acc:HGNC:29825]                                                                  |
| MYLPF      | myosin light chain, phosphorylatable, fast skeletal muscle [Source:HGNC Symbol;Acc:HGNC:29824]                             |
| DIAPH1     | diaphanous related formin 1 [Source:HGNC Symbol;Acc:HGNC:2876]                                                             |
| DIAPH2     | diaphanous related formin 2 [Source:HGNC Symbol;Acc:HGNC:2877]                                                             |
| SLC9A1     | solute carrier family 9 member A1 [Source:HGNC Symbol;Acc:HGNC:11071]                                                      |
| PIP5K1C    | phosphatidylinositol-4-phosphate 5-kinase type 1 gamma [Source:HGNC Symbol;Acc:HGNC:8996]                                  |
| PIP5K1A    | phosphatidylinositol-4-phosphate 5-kinase type 1 alpha [Source:HGNC Symbol;Acc:HGNC:8994]                                  |

|         |                                                                                               |
|---------|-----------------------------------------------------------------------------------------------|
| PIP5K1B | phosphatidylinositol-4-phosphate 5-kinase type 1 beta [Source:HGNC Symbol;Acc:HGNC:8995]      |
| PIP4K2C | phosphatidylinositol-5-phosphate 4-kinase type 2 gamma [Source:HGNC Symbol;Acc:HGNC:23786]    |
| PIP4K2A | phosphatidylinositol-5-phosphate 4-kinase type 2 alpha [Source:HGNC Symbol;Acc:HGNC:8997]     |
| PIP4K2B | phosphatidylinositol-5-phosphate 4-kinase type 2 beta [Source:HGNC Symbol;Acc:HGNC:8998]      |
| PIKFYVE | phosphoinositide kinase, FYVE-type zinc finger containing [Source:HGNC Symbol;Acc:HGNC:23785] |
| LIMK1   | LIM domain kinase 1 [Source:HGNC Symbol;Acc:HGNC:6613]                                        |
| LIMK2   | LIM domain kinase 2 [Source:HGNC Symbol;Acc:HGNC:6614]                                        |
| DIAPH3  | diaphanous related formin 3 [Source:HGNC Symbol;Acc:HGNC:15480]                               |
| BAIAP2  | BAI1 associated protein 2 [Source:HGNC Symbol;Acc:HGNC:947]                                   |
| ENAH    | enabled homolog (Drosophila) [Source:HGNC Symbol;Acc:HGNC:18271]                              |
| WASL    | Wiskott-Aldrich syndrome like [Source:HGNC Symbol;Acc:HGNC:12735]                             |
| WASF2   | WAS protein family member 2 [Source:HGNC Symbol;Acc:HGNC:12733]                               |
| CYFIP1  | cytoplasmic FMR1 interacting protein 1 [Source:HGNC Symbol;Acc:HGNC:13759]                    |
| CYFIP2  | cytoplasmic FMR1 interacting protein 2 [Source:HGNC Symbol;Acc:HGNC:13760]                    |
| NCKAP1  | NCK associated protein 1 [Source:HGNC Symbol;Acc:HGNC:7666]                                   |
| NCKAP1L | NCK associated protein 1 like [Source:HGNC Symbol;Acc:HGNC:4862]                              |
| ABI2    | abl interactor 2 [Source:HGNC Symbol;Acc:HGNC:24011]                                          |
| BRK1    | BRICK1, SCAR/WAVE actin nucleating complex subunit [Source:HGNC Symbol;Acc:HGNC:23057]        |
| WASF1   | WAS protein family member 1 [Source:HGNC Symbol;Acc:HGNC:12732]                               |
| PFN3    | profilin 3 [Source:HGNC Symbol;Acc:HGNC:18627]                                                |
| PFN1    | profilin 1 [Source:HGNC Symbol;Acc:HGNC:8881]                                                 |
| PFN2    | profilin 2 [Source:HGNC Symbol;Acc:HGNC:8882]                                                 |
| PFN4    | profilin family member 4 [Source:HGNC Symbol;Acc:HGNC:31103]                                  |
| PXN     | paxillin [Source:HGNC Symbol;Acc:HGNC:9718]                                                   |
| TMSB4X  | thymosin beta 4, X-linked [Source:HGNC Symbol;Acc:HGNC:11881]                                 |
| TMSB4Y  | thymosin beta 4, Y-linked [Source:HGNC Symbol;Acc:HGNC:11882]                                 |
| CFL1    | cofilin 1 [Source:HGNC Symbol;Acc:HGNC:1874]                                                  |
| CFL2    | cofilin 2 [Source:HGNC Symbol;Acc:HGNC:1875]                                                  |
| SSH1    | slingshot protein phosphatase 1 [Source:HGNC Symbol;Acc:HGNC:30579]                           |
| SSH3    | slingshot protein phosphatase 3 [Source:HGNC Symbol;Acc:HGNC:30581]                           |
| SSH2    | slingshot protein phosphatase 2 [Source:HGNC Symbol;Acc:HGNC:30580]                           |
| VCL     | vinculin [Source:HGNC Symbol;Acc:HGNC:12665]                                                  |
| IQGAP1  | IQ motif containing GTPase activating protein 1 [Source:HGNC Symbol;Acc:HGNC:6110]            |
| IQGAP2  | IQ motif containing GTPase activating protein 2 [Source:HGNC Symbol;Acc:HGNC:6111]            |
| IQGAP3  | IQ motif containing GTPase activating protein 3 [Source:HGNC Symbol;Acc:HGNC:20669]           |
| GSN     | gelsolin [Source:HGNC Symbol;Acc:HGNC:4620]                                                   |
| SCIN    | scinderin [Source:HGNC Symbol;Acc:HGNC:21695]                                                 |
| APC     | adenomatous polyposis coli [Source:HGNC Symbol;Acc:HGNC:583]                                  |
| APC2    | adenomatous polyposis coli 2 [Source:HGNC Symbol;Acc:HGNC:24036]                              |
| ARHGEF4 | Rho guanine nucleotide exchange factor 4 [Source:HGNC Symbol;Acc:HGNC:684]                    |



|         |                                                                        |
|---------|------------------------------------------------------------------------|
| SPATA13 | spermatogenesis associated 13 [Source:HGNC Symbol;Acc:HGNC:23222]      |
| COL1A1  | collagen type I alpha 1 [Source:HGNC Symbol;Acc:HGNC:2197]             |
| COL1A2  | collagen type I alpha 2 chain [Source:HGNC Symbol;Acc:HGNC:2198]       |
| COL2A1  | collagen type II alpha 1 chain [Source:HGNC Symbol;Acc:HGNC:2200]      |
| COL4A2  | collagen type IV alpha 2 [Source:HGNC Symbol;Acc:HGNC:2203]            |
| COL4A4  | collagen type IV alpha 4 chain [Source:HGNC Symbol;Acc:HGNC:2206]      |
| COL4A6  | collagen type IV alpha 6 chain [Source:HGNC Symbol;Acc:HGNC:2208]      |
| COL4A1  | collagen type IV alpha 1 chain [Source:HGNC Symbol;Acc:HGNC:2202]      |
| COL4A5  | collagen type IV alpha 5 chain [Source:HGNC Symbol;Acc:HGNC:2207]      |
| COL4A3  | collagen type IV alpha 3 chain [Source:HGNC Symbol;Acc:HGNC:2204]      |
| COL6A1  | collagen type VI alpha 1 [Source:HGNC Symbol;Acc:HGNC:2211]            |
| COL6A2  | collagen type VI alpha 2 [Source:HGNC Symbol;Acc:HGNC:2212]            |
| COL6A3  | collagen type VI alpha 3 chain [Source:HGNC Symbol;Acc:HGNC:2213]      |
| COL6A6  | collagen type VI alpha 6 [Source:HGNC Symbol;Acc:HGNC:27023]           |
| COL6A5  | collagen type VI alpha 5 [Source:HGNC Symbol;Acc:HGNC:26674]           |
| COL9A1  | collagen type IX alpha 1 [Source:HGNC Symbol;Acc:HGNC:2217]            |
| COL9A2  | collagen type IX alpha 2 [Source:HGNC Symbol;Acc:HGNC:2218]            |
| COL9A3  | collagen type IX alpha 3 [Source:HGNC Symbol;Acc:HGNC:2219]            |
| LAMA1   | laminin subunit alpha 1 [Source:HGNC Symbol;Acc:HGNC:6481]             |
| LAMA2   | laminin subunit alpha 2 [Source:HGNC Symbol;Acc:HGNC:6482]             |
| LAMA3   | laminin subunit alpha 3 [Source:HGNC Symbol;Acc:HGNC:6483]             |
| LAMA5   | laminin subunit alpha 5 [Source:HGNC Symbol;Acc:HGNC:6485]             |
| LAMA4   | laminin subunit alpha 4 [Source:HGNC Symbol;Acc:HGNC:6484]             |
| LAMB1   | laminin subunit beta 1 [Source:HGNC Symbol;Acc:HGNC:6486]              |
| LAMB2   | laminin subunit beta 2 [Source:HGNC Symbol;Acc:HGNC:6487]              |
| LAMB3   | laminin subunit beta 3 [Source:HGNC Symbol;Acc:HGNC:6490]              |
| LAMB4   | laminin subunit beta 4 [Source:HGNC Symbol;Acc:HGNC:6491]              |
| LAMC1   | laminin subunit gamma 1 [Source:HGNC Symbol;Acc:HGNC:6492]             |
| LAMC2   | laminin subunit gamma 2 [Source:HGNC Symbol;Acc:HGNC:6493]             |
| LAMC3   | laminin subunit gamma 3 [Source:HGNC Symbol;Acc:HGNC:6494]             |
| CHAD    | chondroadherin [Source:HGNC Symbol;Acc:HGNC:1909]                      |
| RELN    | reelin [Source:HGNC Symbol;Acc:HGNC:9957]                              |
| COMP    | cartilage oligomeric matrix protein [Source:HGNC Symbol;Acc:HGNC:2227] |
| THBS2   | thrombospondin 2 [Source:HGNC Symbol;Acc:HGNC:11786]                   |
| THBS3   | thrombospondin 3 [Source:HGNC Symbol;Acc:HGNC:11787]                   |
| THBS4   | thrombospondin 4 [Source:HGNC Symbol;Acc:HGNC:11788]                   |
| SPP1    | secreted phosphoprotein 1 [Source:HGNC Symbol;Acc:HGNC:11255]          |
| VTN     | vitronectin [Source:HGNC Symbol;Acc:HGNC:12724]                        |
| TNC     | tenascin C [Source:HGNC Symbol;Acc:HGNC:5318]                          |
| TNN     | tenascin N [Source:HGNC Symbol;Acc:HGNC:22942]                         |
| TNR     | tenascin R [Source:HGNC Symbol;Acc:HGNC:11953]                         |

|         |                                                                                               |
|---------|-----------------------------------------------------------------------------------------------|
| TNXB    | tenascin XB [Source:HGNC Symbol;Acc:HGNC:11976]                                               |
| IBSP    | integrin binding sialoprotein [Source:HGNC Symbol;Acc:HGNC:5341]                              |
| IGF1    | insulin like growth factor 1 [Source:HGNC Symbol;Acc:HGNC:5464]                               |
| PGF     | placental growth factor [Source:HGNC Symbol;Acc:HGNC:8893]                                    |
| VEGFC   | vascular endothelial growth factor C [Source:HGNC Symbol;Acc:HGNC:12682]                      |
| VEGFD   | vascular endothelial growth factor D [Source:HGNC Symbol;Acc:HGNC:3708]                       |
| HGF     | hepatocyte growth factor [Source:HGNC Symbol;Acc:HGNC:4893]                                   |
| ARHGAP5 | Rho GTPase activating protein 5 [Source:HGNC Symbol;Acc:HGNC:675]                             |
| RASGRF1 | Ras protein specific guanine nucleotide releasing factor 1 [Source:HGNC Symbol;Acc:HGNC:9875] |
| CAPN2   | calpain 2 [Source:HGNC Symbol;Acc:HGNC:1479]                                                  |
| TLN1    | talin 1 [Source:HGNC Symbol;Acc:HGNC:11845]                                                   |
| TLN2    | talin 2 [Source:HGNC Symbol;Acc:HGNC:15447]                                                   |
| FLNA    | filamin A [Source:HGNC Symbol;Acc:HGNC:3754]                                                  |
| FLNC    | filamin C [Source:HGNC Symbol;Acc:HGNC:3756]                                                  |
| FLNB    | filamin B [Source:HGNC Symbol;Acc:HGNC:3755]                                                  |
| ZYX     | zyxin [Source:HGNC Symbol;Acc:HGNC:13200]                                                     |
| PARVB   | parvin beta [Source:HGNC Symbol;Acc:HGNC:14653]                                               |
| PARVA   | parvin alpha [Source:HGNC Symbol;Acc:HGNC:14652]                                              |
| PARVG   | parvin gamma [Source:HGNC Symbol;Acc:HGNC:14654]                                              |
| RAPGEF1 | Rap guanine nucleotide exchange factor 1 [Source:HGNC Symbol;Acc:HGNC:4568]                   |
| RAP1B   | RAP1B, member of RAS oncogene family [Source:HGNC Symbol;Acc:HGNC:9857]                       |
| CAV2    | caveolin 2 [Source:HGNC Symbol;Acc:HGNC:1528]                                                 |
| CAV3    | caveolin 3 [Source:HGNC Symbol;Acc:HGNC:1529]                                                 |
| FYN     | FYN proto-oncogene, Src family tyrosine kinase [Source:HGNC Symbol;Acc:HGNC:4037]             |
| SHC1    | SHC adaptor protein 1 [Source:HGNC Symbol;Acc:HGNC:10840]                                     |
| SHC2    | SHC adaptor protein 2 [Source:HGNC Symbol;Acc:HGNC:29869]                                     |
| SHC3    | SHC adaptor protein 3 [Source:HGNC Symbol;Acc:HGNC:18181]                                     |
| SHC4    | SHC adaptor protein 4 [Source:HGNC Symbol;Acc:HGNC:16743]                                     |
| ELK1    | ELK1, ETS transcription factor [Source:HGNC Symbol;Acc:HGNC:3321]                             |
| CCND2   | cyclin D2 [Source:HGNC Symbol;Acc:HGNC:1583]                                                  |
| CCND3   | cyclin D3 [Source:HGNC Symbol;Acc:HGNC:1585]                                                  |
| BIRC2   | baculoviral IAP repeat containing 2 [Source:HGNC Symbol;Acc:HGNC:590]                         |
| BIRC3   | baculoviral IAP repeat containing 3 [Source:HGNC Symbol;Acc:HGNC:591]                         |
| NECTIN4 | nectin cell adhesion molecule 4 [Source:HGNC Symbol;Acc:HGNC:19688]                           |
| FARP2   | FERM, ARH/RhoGEF and pleckstrin domain protein 2 [Source:HGNC Symbol;Acc:HGNC:16460]          |
| WASF3   | WAS protein family member 3 [Source:HGNC Symbol;Acc:HGNC:12734]                               |
| LMO7    | LIM domain 7 [Source:HGNC Symbol;Acc:HGNC:6646]                                               |
| SSX2IP  | SSX family member 2 interacting protein [Source:HGNC Symbol;Acc:HGNC:16509]                   |
| SORBS1  | sorbin and SH3 domain containing 1 [Source:HGNC Symbol;Acc:HGNC:14565]                        |
| CTNND1  | catenin delta 1 [Source:HGNC Symbol;Acc:HGNC:2515]                                            |
| CTNNA3  | catenin alpha 3 [Source:HGNC Symbol;Acc:HGNC:2511]                                            |

|         |                                                                                             |
|---------|---------------------------------------------------------------------------------------------|
| CTNNA2  | catenin alpha 2 [Source:HGNC Symbol;Acc:HGNC:2510]                                          |
| ACP1    | acid phosphatase 1, soluble [Source:HGNC Symbol;Acc:HGNC:122]                               |
| PTPRB   | protein tyrosine phosphatase, receptor type B [Source:HGNC Symbol;Acc:HGNC:9665]            |
| PTPN1   | protein tyrosine phosphatase, non-receptor type 1 [Source:HGNC Symbol;Acc:HGNC:9642]        |
| PTPN6   | protein tyrosine phosphatase, non-receptor type 6 [Source:HGNC Symbol;Acc:HGNC:9658]        |
| PTPRJ   | protein tyrosine phosphatase, receptor type J [Source:HGNC Symbol;Acc:HGNC:9673]            |
| TCF7    | transcription factor 7 (T-cell specific, HMG-box) [Source:HGNC Symbol;Acc:HGNC:11639]       |
| TCF7L1  | transcription factor 7 like 1 [Source:HGNC Symbol;Acc:HGNC:11640]                           |
| TCF7L2  | transcription factor 7 like 2 [Source:HGNC Symbol;Acc:HGNC:11641]                           |
| LEF1    | lymphoid enhancer binding factor 1 [Source:HGNC Symbol;Acc:HGNC:6551]                       |
| INSR    | insulin receptor [Source:HGNC Symbol;Acc:HGNC:6091]                                         |
| FER     | FER tyrosine kinase [Source:HGNC Symbol;Acc:HGNC:3655]                                      |
| YES1    | YES proto-oncogene 1, Src family tyrosine kinase [Source:HGNC Symbol;Acc:HGNC:12841]        |
| TGFBR1  | transforming growth factor beta receptor 1 [Source:HGNC Symbol;Acc:HGNC:11772]              |
| TGFBR2  | transforming growth factor beta receptor 2 [Source:HGNC Symbol;Acc:HGNC:11773]              |
| CREBBP  | CREB binding protein [Source:HGNC Symbol;Acc:HGNC:2348]                                     |
| NLK     | nemo like kinase [Source:HGNC Symbol;Acc:HGNC:29858]                                        |
| PGLS    | 6-phosphogluconolactonase [Source:HGNC Symbol;Acc:HGNC:8903]                                |
| H6PD    | hexose-6-phosphate dehydrogenase/glucose 1-dehydrogenase [Source:HGNC Symbol;Acc:HGNC:4795] |
| PGD     | phosphogluconate dehydrogenase [Source:HGNC Symbol;Acc:HGNC:8891]                           |
| RPE     | ribulose-5-phosphate-3-epimerase [Source:HGNC Symbol;Acc:HGNC:10293]                        |
| RPEL1   | ribulose-5-phosphate-3-epimerase-like 1 [Source:HGNC Symbol;Acc:HGNC:45241]                 |
| TKTL2   | transketolase like 2 [Source:HGNC Symbol;Acc:HGNC:25313]                                    |
| TKTL1   | transketolase like 1 [Source:HGNC Symbol;Acc:HGNC:11835]                                    |
| TALDO1  | transaldolase 1 [Source:HGNC Symbol;Acc:HGNC:11559]                                         |
| RPIA    | ribose 5-phosphate isomerase A [Source:HGNC Symbol;Acc:HGNC:10297]                          |
| DERA    | deoxyribose-phosphate aldolase [Source:HGNC Symbol;Acc:HGNC:24269]                          |
| RBKS    | ribokinase [Source:HGNC Symbol;Acc:HGNC:30325]                                              |
| PGM1    | phosphoglucomutase 1 [Source:HGNC Symbol;Acc:HGNC:8905]                                     |
| PGM2    | phosphoglucomutase 2 [Source:HGNC Symbol;Acc:HGNC:8906]                                     |
| PRPS1L1 | phosphoribosyl pyrophosphate synthetase 1-like 1 [Source:HGNC Symbol;Acc:HGNC:9463]         |
| PRPS2   | phosphoribosyl pyrophosphate synthetase 2 [Source:HGNC Symbol;Acc:HGNC:9465]                |
| PRPS1   | phosphoribosyl pyrophosphate synthetase 1 [Source:HGNC Symbol;Acc:HGNC:9462]                |
| RGN     | regucalcin [Source:HGNC Symbol;Acc:HGNC:9989]                                               |
| IDNK    | IDNK, gluconokinase [Source:HGNC Symbol;Acc:HGNC:31367]                                     |
| GLYCK   | glycerate kinase [Source:HGNC Symbol;Acc:HGNC:24247]                                        |
| ALDOB   | aldolase, fructose-bisphosphate B [Source:HGNC Symbol;Acc:HGNC:417]                         |
| FBP1    | fructose-bisphosphatase 1 [Source:HGNC Symbol;Acc:HGNC:3606]                                |
| FBP2    | fructose-bisphosphatase 2 [Source:HGNC Symbol;Acc:HGNC:3607]                                |
| PFKP    | phosphofructokinase, platelet [Source:HGNC Symbol;Acc:HGNC:8878]                            |
| PFKL    | phosphofructokinase, liver type [Source:HGNC Symbol;Acc:HGNC:8876]                          |

|         |                                                                                               |
|---------|-----------------------------------------------------------------------------------------------|
| ACSS1   | acyl-CoA synthetase short-chain family member 1 [Source:HGNC Symbol;Acc:HGNC:16091]           |
| ACSS2   | acyl-CoA synthetase short-chain family member 2 [Source:HGNC Symbol;Acc:HGNC:15814]           |
| PDHA2   | pyruvate dehydrogenase (lipoamide) alpha 2 [Source:HGNC Symbol;Acc:HGNC:8807]                 |
| PDHA1   | pyruvate dehydrogenase (lipoamide) alpha 1 [Source:HGNC Symbol;Acc:HGNC:8806]                 |
| PDHB    | pyruvate dehydrogenase (lipoamide) beta [Source:HGNC Symbol;Acc:HGNC:8808]                    |
| DLAT    | dihydrolipoamide S-acetyltransferase [Source:HGNC Symbol;Acc:HGNC:2896]                       |
| DLD     | dihydrolipoamide dehydrogenase [Source:HGNC Symbol;Acc:HGNC:2898]                             |
| ADH1A   | alcohol dehydrogenase 1A (class I), alpha polypeptide [Source:HGNC Symbol;Acc:HGNC:249]       |
| ADH1B   | alcohol dehydrogenase 1B (class I), beta polypeptide [Source:HGNC Symbol;Acc:HGNC:250]        |
| ADH1C   | alcohol dehydrogenase 1C (class I), gamma polypeptide [Source:HGNC Symbol;Acc:HGNC:251]       |
| ADH7    | alcohol dehydrogenase 7 (class IV), mu or sigma polypeptide [Source:HGNC Symbol;Acc:HGNC:256] |
| ADH4    | alcohol dehydrogenase 4 (class II), pi polypeptide [Source:HGNC Symbol;Acc:HGNC:252]          |
| ADH6    | alcohol dehydrogenase 6 (class V) [Source:HGNC Symbol;Acc:HGNC:255]                           |
| ADH5    | alcohol dehydrogenase 5 (class III), chi polypeptide [Source:HGNC Symbol;Acc:HGNC:253]        |
| AKR1A1  | aldo-keto reductase family 1 member A1 [Source:HGNC Symbol;Acc:HGNC:380]                      |
| PKLR    | pyruvate kinase, liver and RBC [Source:HGNC Symbol;Acc:HGNC:9020]                             |
| ACACB   | acetyl-CoA carboxylase beta [Source:HGNC Symbol;Acc:HGNC:85]                                  |
| ACYP2   | acylphosphatase 2 [Source:HGNC Symbol;Acc:HGNC:180]                                           |
| ACYP1   | acylphosphatase 1 [Source:HGNC Symbol;Acc:HGNC:179]                                           |
| ALDH2   | aldehyde dehydrogenase 2 family (mitochondrial) [Source:HGNC Symbol;Acc:HGNC:404]             |
| ALDH3A2 | aldehyde dehydrogenase 3 family member A2 [Source:HGNC Symbol;Acc:HGNC:403]                   |
| ALDH1B1 | aldehyde dehydrogenase 1 family member B1 [Source:HGNC Symbol;Acc:HGNC:407]                   |
| ALDH7A1 | aldehyde dehydrogenase 7 family member A1 [Source:HGNC Symbol;Acc:HGNC:877]                   |
| ALDH9A1 | aldehyde dehydrogenase 9 family member A1 [Source:HGNC Symbol;Acc:HGNC:412]                   |
| ACOT12  | acyl-CoA thioesterase 12 [Source:HGNC Symbol;Acc:HGNC:24436]                                  |
| LDHAL6A | lactate dehydrogenase A like 6A [Source:HGNC Symbol;Acc:HGNC:28335]                           |
| LDHAL6B | lactate dehydrogenase A like 6B [Source:HGNC Symbol;Acc:HGNC:21481]                           |
| HAGH    | hydroxyacylglutathione hydrolase [Source:HGNC Symbol;Acc:HGNC:4805]                           |
| GRHPR   | glyoxylate reductase/hydroxypyruvate reductase [Source:HGNC Symbol;Acc:HGNC:4570]             |
| ME2     | malic enzyme 2 [Source:HGNC Symbol;Acc:HGNC:6984]                                             |
| ME3     | malic enzyme 3 [Source:HGNC Symbol;Acc:HGNC:6985]                                             |
| ME1     | malic enzyme 1 [Source:HGNC Symbol;Acc:HGNC:6983]                                             |
| MDH1    | malate dehydrogenase 1 [Source:HGNC Symbol;Acc:HGNC:6970]                                     |
| FH      | fumarate hydratase [Source:HGNC Symbol;Acc:HGNC:3700]                                         |
| PCK1    | phosphoenolpyruvate carboxykinase 1 [Source:HGNC Symbol;Acc:HGNC:8724]                        |
| PCK2    | phosphoenolpyruvate carboxykinase 2, mitochondrial [Source:HGNC Symbol;Acc:HGNC:8725]         |
| ACAT2   | acetyl-CoA acetyltransferase 2 [Source:HGNC Symbol;Acc:HGNC:94]                               |
| ACAT1   | acetyl-CoA acetyltransferase 1 [Source:HGNC Symbol;Acc:HGNC:93]                               |
| GCK     | glucokinase [Source:HGNC Symbol;Acc:HGNC:4195]                                                |
| SCO2    | SCO2 cytochrome c oxidase assembly protein [Source:HGNC Symbol;Acc:HGNC:10604]                |
| RET     | ret proto-oncogene [Source:HGNC Symbol;Acc:HGNC:9967]                                         |

|         |                                                                                                          |
|---------|----------------------------------------------------------------------------------------------------------|
| NTRK1   | neurotrophic receptor tyrosine kinase 1 [Source:HGNC Symbol;Acc:HGNC:8031]                               |
| NTRK3   | neurotrophic receptor tyrosine kinase 3 [Source:HGNC Symbol;Acc:HGNC:8033]                               |
| FLT3    | fms related tyrosine kinase 3 [Source:HGNC Symbol;Acc:HGNC:3765]                                         |
| HKDC1   | hexokinase domain containing 1 [Source:HGNC Symbol;Acc:HGNC:23302]                                       |
| PGAM1   | phosphoglycerate mutase 1 [Source:HGNC Symbol;Acc:HGNC:8888]                                             |
| PGAM2   | phosphoglycerate mutase 2 [Source:HGNC Symbol;Acc:HGNC:8889]                                             |
| PGAM4   | phosphoglycerate mutase family member 4 [Source:HGNC Symbol;Acc:HGNC:21731]                              |
| TIGAR   | TP53 induced glycolysis regulatory phosphatase [Source:HGNC Symbol;Acc:HGNC:1185]                        |
| CS      | citrate synthase [Source:HGNC Symbol;Acc:HGNC:2422]                                                      |
| ACLY    | ATP citrate lyase [Source:HGNC Symbol;Acc:HGNC:115]                                                      |
| ACO1    | aconitase 1 [Source:HGNC Symbol;Acc:HGNC:117]                                                            |
| IDH3B   | isocitrate dehydrogenase 3 (NAD(+)) beta [Source:HGNC Symbol;Acc:HGNC:5385]                              |
| IDH3G   | isocitrate dehydrogenase 3 (NAD(+)) gamma [Source:HGNC Symbol;Acc:HGNC:5386]                             |
| IDH3A   | isocitrate dehydrogenase 3 (NAD(+)) alpha [Source:HGNC Symbol;Acc:HGNC:5384]                             |
| OGDHL   | oxoglutarate dehydrogenase-like [Source:HGNC Symbol;Acc:HGNC:25590]                                      |
| OGDH    | oxoglutarate dehydrogenase [Source:HGNC Symbol;Acc:HGNC:8124]                                            |
| DLST    | dihydrolipoamide S-succinyltransferase [Source:HGNC Symbol;Acc:HGNC:2911]                                |
| SUCLG1  | succinate-CoA ligase alpha subunit [Source:HGNC Symbol;Acc:HGNC:11449]                                   |
| SUCLG2  | succinate-CoA ligase GDP-forming beta subunit [Source:HGNC Symbol;Acc:HGNC:11450]                        |
| SUCLA2  | succinate-CoA ligase ADP-forming beta subunit [Source:HGNC Symbol;Acc:HGNC:11448]                        |
| SDHC    | succinate dehydrogenase complex subunit C [Source:HGNC Symbol;Acc:HGNC:10682]                            |
| SDHD    | succinate dehydrogenase complex subunit D [Source:HGNC Symbol;Acc:HGNC:10683]                            |
| TPI1    | triosephosphate isomerase 1 [Source:HGNC Symbol;Acc:HGNC:12009]                                          |
| GAPDHS  | glyceraldehyde-3-phosphate dehydrogenase, spermatogenic [Source:HGNC Symbol;Acc:HGNC:24864]              |
| ENO3    | enolase 3 [Source:HGNC Symbol;Acc:HGNC:3354]                                                             |
| ENO2    | enolase 2 [Source:HGNC Symbol;Acc:HGNC:3353]                                                             |
| ENO4    | enolase family member 4 [Source:HGNC Symbol;Acc:HGNC:31670]                                              |
| ALDH3B1 | aldehyde dehydrogenase 3 family member B1 [Source:HGNC Symbol;Acc:HGNC:410]                              |
| ALDH3B2 | aldehyde dehydrogenase 3 family member B2 [Source:HGNC Symbol;Acc:HGNC:411]                              |
| ALDH3A1 | aldehyde dehydrogenase 3 family member A1 [Source:HGNC Symbol;Acc:HGNC:405]                              |
| GALM    | galactose mutarotase [Source:HGNC Symbol;Acc:HGNC:24063]                                                 |
| G6PC2   | glucose-6-phosphatase catalytic subunit 2 [Source:HGNC Symbol;Acc:HGNC:28906]                            |
| G6PC3   | glucose-6-phosphatase catalytic subunit 3 [Source:HGNC Symbol;Acc:HGNC:24861]                            |
| ADPGK   | ADP dependent glucokinase [Source:HGNC Symbol;Acc:HGNC:25250]                                            |
| BPGM    | bisphosphoglycerate mutase [Source:HGNC Symbol;Acc:HGNC:1093]                                            |
| MINPP1  | multiple inositol-polyphosphate phosphatase 1 [Source:HGNC Symbol;Acc:HGNC:7102]                         |
| G6PC    | glucose-6-phosphatase catalytic subunit [Source:HGNC Symbol;Acc:HGNC:4056]                               |
| MT-ND2  | mitochondrially encoded NADH:ubiquinone oxidoreductase core subunit 2 [Source:HGNC Symbol;Acc:HGNC:7456] |
| MT-ND3  | mitochondrially encoded NADH:ubiquinone oxidoreductase core subunit 3 [Source:HGNC Symbol;Acc:HGNC:7458] |

|          |                                                                                                           |
|----------|-----------------------------------------------------------------------------------------------------------|
| MT-ND4   | mitochondrially encoded NADH:ubiquinone oxidoreductase core subunit 4 [Source:HGNC Symbol;Acc:HGNC:7459]  |
| MT-ND4L  | mitochondrially encoded NADH:ubiquinone oxidoreductase core subunit 4L [Source:HGNC Symbol;Acc:HGNC:7460] |
| MT-ND5   | mitochondrially encoded NADH:ubiquinone oxidoreductase core subunit 5 [Source:HGNC Symbol;Acc:HGNC:7461]  |
| MT-ND6   | mitochondrially encoded NADH:ubiquinone oxidoreductase core subunit 6 [Source:HGNC Symbol;Acc:HGNC:7462]  |
| NDUFS1   | NADH:ubiquinone oxidoreductase core subunit S1 [Source:HGNC Symbol;Acc:HGNC:7707]                         |
| NDUFS2   | NADH:ubiquinone oxidoreductase core subunit S2 [Source:HGNC Symbol;Acc:HGNC:7708]                         |
| NDUFS3   | NADH:ubiquinone oxidoreductase core subunit S3 [Source:HGNC Symbol;Acc:HGNC:7710]                         |
| NDUFS4   | NADH:ubiquinone oxidoreductase subunit S4 [Source:HGNC Symbol;Acc:HGNC:7711]                              |
| NDUFS5   | NADH:ubiquinone oxidoreductase subunit S5 [Source:HGNC Symbol;Acc:HGNC:7712]                              |
| NDUFS6   | NADH:ubiquinone oxidoreductase subunit S6 [Source:HGNC Symbol;Acc:HGNC:7713]                              |
| NDUFS7   | NADH:ubiquinone oxidoreductase core subunit S7 [Source:HGNC Symbol;Acc:HGNC:7714]                         |
| NDUFS8   | NADH:ubiquinone oxidoreductase core subunit S8 [Source:HGNC Symbol;Acc:HGNC:7715]                         |
| NDUFV1   | NADH:ubiquinone oxidoreductase core subunit V1 [Source:HGNC Symbol;Acc:HGNC:7716]                         |
| NDUFV2   | NADH:ubiquinone oxidoreductase core subunit V2 [Source:HGNC Symbol;Acc:HGNC:7717]                         |
| NDUFV3   | NADH:ubiquinone oxidoreductase subunit V3 [Source:HGNC Symbol;Acc:HGNC:7719]                              |
| NDUFA1   | NADH:ubiquinone oxidoreductase subunit A1 [Source:HGNC Symbol;Acc:HGNC:7683]                              |
| NDUFA2   | NADH:ubiquinone oxidoreductase subunit A2 [Source:HGNC Symbol;Acc:HGNC:7685]                              |
| NDUFA3   | NADH:ubiquinone oxidoreductase subunit A3 [Source:HGNC Symbol;Acc:HGNC:7686]                              |
| NDUFA4   | NDUFA4, mitochondrial complex associated [Source:HGNC Symbol;Acc:HGNC:7687]                               |
| NDUFA4L2 | NADH dehydrogenase (ubiquinone) 1 alpha subcomplex, 4-like 2 [Source:HGNC Symbol;Acc:HGNC:29836]          |
| NDUFA5   | NADH:ubiquinone oxidoreductase subunit A5 [Source:HGNC Symbol;Acc:HGNC:7688]                              |
| NDUFA6   | NADH:ubiquinone oxidoreductase subunit A6 [Source:HGNC Symbol;Acc:HGNC:7690]                              |
| NDUFA7   | NADH:ubiquinone oxidoreductase subunit A7 [Source:HGNC Symbol;Acc:HGNC:7691]                              |
| NDUFA8   | NADH:ubiquinone oxidoreductase subunit A8 [Source:HGNC Symbol;Acc:HGNC:7692]                              |
| NDUFA9   | NADH:ubiquinone oxidoreductase subunit A9 [Source:HGNC Symbol;Acc:HGNC:7693]                              |
| NDUFA10  | NADH:ubiquinone oxidoreductase subunit A10 [Source:HGNC Symbol;Acc:HGNC:7684]                             |
| NDUFAB1  | NADH:ubiquinone oxidoreductase subunit AB1 [Source:HGNC Symbol;Acc:HGNC:7694]                             |
| NDUFA11  | NADH:ubiquinone oxidoreductase subunit A11 [Source:HGNC Symbol;Acc:HGNC:20371]                            |
| NDUFA12  | NADH:ubiquinone oxidoreductase subunit A12 [Source:HGNC Symbol;Acc:HGNC:23987]                            |
| NDUFA13  | NADH:ubiquinone oxidoreductase subunit A13 [Source:HGNC Symbol;Acc:HGNC:17194]                            |
| NDUFB1   | NADH:ubiquinone oxidoreductase subunit B1 [Source:HGNC Symbol;Acc:HGNC:7695]                              |
| NDUFB2   | NADH:ubiquinone oxidoreductase subunit B2 [Source:HGNC Symbol;Acc:HGNC:7697]                              |
| NDUFB3   | NADH:ubiquinone oxidoreductase subunit B3 [Source:HGNC Symbol;Acc:HGNC:7698]                              |
| NDUFB4   | NADH:ubiquinone oxidoreductase subunit B4 [Source:HGNC Symbol;Acc:HGNC:7699]                              |
| NDUFB5   | NADH:ubiquinone oxidoreductase subunit B5 [Source:HGNC Symbol;Acc:HGNC:7700]                              |
| NDUFB6   | NADH:ubiquinone oxidoreductase subunit B6 [Source:HGNC Symbol;Acc:HGNC:7701]                              |
| NDUFB7   | NADH:ubiquinone oxidoreductase subunit B7 [Source:HGNC Symbol;Acc:HGNC:7702]                              |
| NDUFB8   | NADH:ubiquinone oxidoreductase subunit B8 [Source:HGNC Symbol;Acc:HGNC:7703]                              |

|               |                                                                                                          |
|---------------|----------------------------------------------------------------------------------------------------------|
| NDUFB9        | NADH:ubiquinone oxidoreductase subunit B9 [Source:HGNC Symbol;Acc:HGNC:7704]                             |
| NDUFB10       | NADH:ubiquinone oxidoreductase subunit B10 [Source:HGNC Symbol;Acc:HGNC:7696]                            |
| NDUFB11       | NADH:ubiquinone oxidoreductase subunit B11 [Source:HGNC Symbol;Acc:HGNC:20372]                           |
| NDUFC1        | NADH:ubiquinone oxidoreductase subunit C1 [Source:HGNC Symbol;Acc:HGNC:7705]                             |
| NDUFC2        | NADH:ubiquinone oxidoreductase subunit C2 [Source:HGNC Symbol;Acc:HGNC:7706]                             |
| NDUFC2-KCTD14 | NDUFC2-KCTD14 readthrough [Source:HGNC Symbol;Acc:HGNC:42956]                                            |
| UQCRC1        | ubiquinol-cytochrome c reductase, Rieske iron-sulfur polypeptide 1 [Source:HGNC Symbol;Acc:HGNC:12587]   |
| MT-CYB        | mitochondrially encoded cytochrome b [Source:HGNC Symbol;Acc:HGNC:7427]                                  |
| CYC1          | cytochrome c1 [Source:HGNC Symbol;Acc:HGNC:2579]                                                         |
| UQCRC1        | ubiquinol-cytochrome c reductase core protein I [Source:HGNC Symbol;Acc:HGNC:12585]                      |
| UQCRC2        | ubiquinol-cytochrome c reductase core protein II [Source:HGNC Symbol;Acc:HGNC:12586]                     |
| UQCRH         | ubiquinol-cytochrome c reductase hinge protein [Source:HGNC Symbol;Acc:HGNC:12590]                       |
| UQCRHL        | ubiquinol-cytochrome c reductase hinge protein like [Source:HGNC Symbol;Acc:HGNC:51714]                  |
| UQCRB         | ubiquinol-cytochrome c reductase binding protein [Source:HGNC Symbol;Acc:HGNC:12582]                     |
| UQCR10        | ubiquinol-cytochrome c reductase, complex III subunit X [Source:HGNC Symbol;Acc:HGNC:30863]              |
| UQCR11        | ubiquinol-cytochrome c reductase, complex III subunit XI [Source:HGNC Symbol;Acc:HGNC:30862]             |
| COX10         | COX10 heme A:farnesyltransferase cytochrome c oxidase assembly factor [Source:HGNC Symbol;Acc:HGNC:2260] |
| MT-CO3        | mitochondrially encoded cytochrome c oxidase III [Source:HGNC Symbol;Acc:HGNC:7422]                      |
| COX4I2        | cytochrome c oxidase subunit 4I2 [Source:HGNC Symbol;Acc:HGNC:16232]                                     |
| COX4I1        | cytochrome c oxidase subunit 4I1 [Source:HGNC Symbol;Acc:HGNC:2265]                                      |
| COX5A         | cytochrome c oxidase subunit 5A [Source:HGNC Symbol;Acc:HGNC:2267]                                       |
| COX5B         | cytochrome c oxidase subunit 5B [Source:HGNC Symbol;Acc:HGNC:2269]                                       |
| COX6A1        | cytochrome c oxidase subunit 6A1 [Source:HGNC Symbol;Acc:HGNC:2277]                                      |
| COX6A2        | cytochrome c oxidase subunit 6A2 [Source:HGNC Symbol;Acc:HGNC:2279]                                      |
| COX6B1        | cytochrome c oxidase subunit 6B1 [Source:HGNC Symbol;Acc:HGNC:2280]                                      |
| COX6B2        | cytochrome c oxidase subunit 6B2 [Source:HGNC Symbol;Acc:HGNC:24380]                                     |
| COX6C         | cytochrome c oxidase subunit 6C [Source:HGNC Symbol;Acc:HGNC:2285]                                       |
| COX7A1        | cytochrome c oxidase subunit 7A1 [Source:HGNC Symbol;Acc:HGNC:2287]                                      |
| COX7A2        | cytochrome c oxidase subunit 7A2 [Source:HGNC Symbol;Acc:HGNC:2288]                                      |
| COX7A2L       | cytochrome c oxidase subunit 7A2 like [Source:HGNC Symbol;Acc:HGNC:2289]                                 |
| COX7B         | cytochrome c oxidase subunit 7B [Source:HGNC Symbol;Acc:HGNC:2291]                                       |
| COX7B2        | cytochrome c oxidase subunit 7B2 [Source:HGNC Symbol;Acc:HGNC:24381]                                     |
| COX7C         | cytochrome c oxidase subunit 7C [Source:HGNC Symbol;Acc:HGNC:2292]                                       |
| COX8C         | cytochrome c oxidase subunit 8C [Source:HGNC Symbol;Acc:HGNC:24382]                                      |
| COX8A         | cytochrome c oxidase subunit 8A [Source:HGNC Symbol;Acc:HGNC:2294]                                       |
| COX11         | COX11 cytochrome c oxidase copper chaperone [Source:HGNC Symbol;Acc:HGNC:2261]                           |
| COX15         | COX15 cytochrome c oxidase assembly homolog [Source:HGNC Symbol;Acc:HGNC:2263]                           |
| COX17         | COX17 cytochrome c oxidase copper chaperone [Source:HGNC Symbol;Acc:HGNC:2264]                           |

|          |                                                                                                                            |
|----------|----------------------------------------------------------------------------------------------------------------------------|
| CYCS     | cytochrome c, somatic [Source:HGNC Symbol;Acc:HGNC:19986]                                                                  |
| MT-ATP6  | mitochondrially encoded ATP synthase 6 [Source:HGNC Symbol;Acc:HGNC:7414]                                                  |
| MT-ATP8  | mitochondrially encoded ATP synthase 8 [Source:HGNC Symbol;Acc:HGNC:7415]                                                  |
| ATP6V1A  | ATPase H+ transporting V1 subunit A [Source:HGNC Symbol;Acc:HGNC:851]                                                      |
| ATP6V1B1 | ATPase H+ transporting V1 subunit B1 [Source:HGNC Symbol;Acc:HGNC:853]                                                     |
| ATP6V1B2 | ATPase H+ transporting V1 subunit B2 [Source:HGNC Symbol;Acc:HGNC:854]                                                     |
| ATP6V1C2 | ATPase H+ transporting V1 subunit C2 [Source:HGNC Symbol;Acc:HGNC:18264]                                                   |
| ATP6V1C1 | ATPase H+ transporting V1 subunit C1 [Source:HGNC Symbol;Acc:HGNC:856]                                                     |
| ATP6V1D  | ATPase H+ transporting V1 subunit D [Source:HGNC Symbol;Acc:HGNC:13527]                                                    |
| ATP6V1E2 | ATPase H+ transporting V1 subunit E2 [Source:HGNC Symbol;Acc:HGNC:18125]                                                   |
| ATP6V1E1 | ATPase H+ transporting V1 subunit E1 [Source:HGNC Symbol;Acc:HGNC:857]                                                     |
| ATP6V1F  | ATPase H+ transporting V1 subunit F [Source:HGNC Symbol;Acc:HGNC:16832]                                                    |
| ATP6V1G1 | ATPase H+ transporting V1 subunit G1 [Source:HGNC Symbol;Acc:HGNC:864]                                                     |
| ATP6V1G3 | ATPase H+ transporting V1 subunit G3 [Source:HGNC Symbol;Acc:HGNC:18265]                                                   |
| ATP6V1G2 | ATPase H+ transporting V1 subunit G2 [Source:HGNC Symbol;Acc:HGNC:862]                                                     |
| ATP6V1H  | ATPase H+ transporting V1 subunit H [Source:HGNC Symbol;Acc:HGNC:18303]                                                    |
| TCIRG1   | T-cell immune regulator 1, ATPase H+ transporting V0 subunit a3 [Source:HGNC Symbol;Acc:HGNC:11647]                        |
| ATP6V0A2 | ATPase H+ transporting V0 subunit a2 [Source:HGNC Symbol;Acc:HGNC:18481]                                                   |
| ATP6V0A4 | ATPase H+ transporting V0 subunit a4 [Source:HGNC Symbol;Acc:HGNC:866]                                                     |
| ATP6V0A1 | ATPase H+ transporting V0 subunit a1 [Source:HGNC Symbol;Acc:HGNC:865]                                                     |
| ATP6V0C  | ATPase H+ transporting V0 subunit c [Source:HGNC Symbol;Acc:HGNC:855]                                                      |
| ATP6V0B  | ATPase H+ transporting V0 subunit b [Source:HGNC Symbol;Acc:HGNC:861]                                                      |
| ATP6V0D1 | ATPase H+ transporting V0 subunit d1 [Source:HGNC Symbol;Acc:HGNC:13724]                                                   |
| ATP6V0D2 | ATPase H+ transporting V0 subunit d2 [Source:HGNC Symbol;Acc:HGNC:18266]                                                   |
| ATP6V0E1 | ATPase H+ transporting V0 subunit e1 [Source:HGNC Symbol;Acc:HGNC:863]                                                     |
| ATP6V0E2 | ATPase H+ transporting V0 subunit e2 [Source:HGNC Symbol;Acc:HGNC:21723]                                                   |
| ATP6AP1  | ATPase H+ transporting accessory protein 1 [Source:HGNC Symbol;Acc:HGNC:868]                                               |
| ATP4A    | ATPase H+/K+ transporting alpha subunit [Source:HGNC Symbol;Acc:HGNC:819]                                                  |
| ATP4B    | ATPase H+/K+ transporting beta subunit [Source:HGNC Symbol;Acc:HGNC:820]                                                   |
| ATP12A   | ATPase H+/K+ transporting non-gastric alpha2 subunit [Source:HGNC Symbol;Acc:HGNC:13816]                                   |
| PPA2     | pyrophosphatase (inorganic) 2 [Source:HGNC Symbol;Acc:HGNC:28883]                                                          |
| PPA1     | pyrophosphatase (inorganic) 1 [Source:HGNC Symbol;Acc:HGNC:9226]                                                           |
| LHPP     | phospholysine phosphohistidine inorganic pyrophosphate phosphatase [Source:HGNC Symbol;Acc:HGNC:30042]                     |
| ATP5A1   | ATP synthase, H+ transporting, mitochondrial F1 complex, alpha subunit 1, cardiac muscle [Source:HGNC Symbol;Acc:HGNC:823] |
| ATP5B    | ATP synthase, H+ transporting, mitochondrial F1 complex, beta polypeptide [Source:HGNC Symbol;Acc:HGNC:830]                |
| ATP5C1   | ATP synthase, H+ transporting, mitochondrial F1 complex, gamma polypeptide 1 [Source:HGNC Symbol;Acc:HGNC:833]             |
| ATP5D    | ATP synthase, H+ transporting, mitochondrial F1 complex, delta subunit [Source:HGNC Symbol;Acc:HGNC:837]                   |



|        |                                                                                                                  |
|--------|------------------------------------------------------------------------------------------------------------------|
| ATP5E  | ATP synthase, H+ transporting, mitochondrial F1 complex, epsilon subunit [Source:HGNC Symbol;Acc:HGNC:838]       |
| ATP5G1 | ATP synthase, H+ transporting, mitochondrial Fo complex subunit C1 (subunit 9) [Source:HGNC Symbol;Acc:HGNC:841] |
| ATP5G2 | ATP synthase, H+ transporting, mitochondrial Fo complex subunit C2 (subunit 9) [Source:HGNC Symbol;Acc:HGNC:842] |
| ATP5G3 | ATP synthase, H+ transporting, mitochondrial Fo complex subunit C3 (subunit 9) [Source:HGNC Symbol;Acc:HGNC:843] |
| ATP5I  | ATP synthase, H+ transporting, mitochondrial Fo complex subunit E [Source:HGNC Symbol;Acc:HGNC:846]              |
| ATP5J2 | ATP synthase, H+ transporting, mitochondrial Fo complex subunit F2 [Source:HGNC Symbol;Acc:HGNC:848]             |
| ATP5L  | ATP synthase, H+ transporting, mitochondrial Fo complex subunit G [Source:HGNC Symbol;Acc:HGNC:14247]            |
| ATP5F1 | ATP synthase, H+ transporting, mitochondrial Fo complex subunit B1 [Source:HGNC Symbol;Acc:HGNC:840]             |
| ATP5H  | ATP synthase, H+ transporting, mitochondrial Fo complex subunit D [Source:HGNC Symbol;Acc:HGNC:845]              |
| ATP5J  | ATP synthase, H+ transporting, mitochondrial Fo complex subunit F6 [Source:HGNC Symbol;Acc:HGNC:847]             |
| ATP5O  | ATP synthase, H+ transporting, mitochondrial F1 complex, O subunit [Source:HGNC Symbol;Acc:HGNC:850]             |
| MT-CO1 | mitochondrially encoded cytochrome c oxidase I [Source:HGNC Symbol;Acc:HGNC:7419]                                |
| MT-CO2 | mitochondrially encoded cytochrome c oxidase II [Source:HGNC Symbol;Acc:HGNC:7421]                               |
| MT-ND1 | mitochondrially encoded NADH:ubiquinone oxidoreductase core subunit 1 [Source:HGNC Symbol;Acc:HGNC:7455]         |
| MGAM   | maltase-glucoamylase [Source:HGNC Symbol;Acc:HGNC:7043]                                                          |
| MGAM2  | maltase-glucoamylase 2 (putative) [Source:HGNC Symbol;Acc:HGNC:28101]                                            |
| GAA    | glucosidase alpha, acid [Source:HGNC Symbol;Acc:HGNC:4065]                                                       |
| GANC   | glucosidase alpha, neutral C [Source:HGNC Symbol;Acc:HGNC:4139]                                                  |
| SI     | sucrase-isomaltase [Source:HGNC Symbol;Acc:HGNC:10856]                                                           |
| UGP2   | UDP-glucose pyrophosphorylase 2 [Source:HGNC Symbol;Acc:HGNC:12527]                                              |
| ENPP1  | ectonucleotide pyrophosphatase/phosphodiesterase 1 [Source:HGNC Symbol;Acc:HGNC:3356]                            |
| ENPP3  | ectonucleotide pyrophosphatase/phosphodiesterase 3 [Source:HGNC Symbol;Acc:HGNC:3358]                            |
| GYS2   | glycogen synthase 2 [Source:HGNC Symbol;Acc:HGNC:4707]                                                           |
| GYG1   | glycogenin 1 [Source:HGNC Symbol;Acc:HGNC:4699]                                                                  |
| GYG2   | glycogenin 2 [Source:HGNC Symbol;Acc:HGNC:4700]                                                                  |
| GBE1   | glucan (1,4-alpha-), branching enzyme 1 [Source:HGNC Symbol;Acc:HGNC:4180]                                       |
| AGL    | amylase, alpha-1, 6-glucosidase, 4-alpha-glucanotransferase [Source:HGNC Symbol;Acc:HGNC:321]                    |
| AMY1C  | amylase, alpha 1C (salivary) [Source:HGNC Symbol;Acc:HGNC:476]                                                   |
| AMY2A  | amylase, alpha 2A (pancreatic) [Source:HGNC Symbol;Acc:HGNC:477]                                                 |
| AMY1A  | amylase, alpha 1A (salivary) [Source:HGNC Symbol;Acc:HGNC:474]                                                   |
| AMY2B  | amylase, alpha 2B (pancreatic) [Source:HGNC Symbol;Acc:HGNC:478]                                                 |
| AMY1B  | amylase, alpha 1B (salivary) [Source:HGNC Symbol;Acc:HGNC:475]                                                   |
| TREH   | trehalase [Source:HGNC Symbol;Acc:HGNC:12266]                                                                    |
| PGM2L1 | phosphoglucomutase 2-like 1 [Source:HGNC Symbol;Acc:HGNC:20898]                                                  |

|         |                                                                                                           |
|---------|-----------------------------------------------------------------------------------------------------------|
| GBA     | glucosylceramidase beta [Source:HGNC Symbol;Acc:HGNC:4177]                                                |
| CYP27A1 | cytochrome P450 family 27 subfamily A member 1 [Source:HGNC Symbol;Acc:HGNC:2605]                         |
| CYP7A1  | cytochrome P450 family 7 subfamily A member 1 [Source:HGNC Symbol;Acc:HGNC:2651]                          |
| LCAT    | lecithin-cholesterol acyltransferase [Source:HGNC Symbol;Acc:HGNC:6522]                                   |
| LIPA    | lipase A, lysosomal acid type [Source:HGNC Symbol;Acc:HGNC:6617]                                          |
| APOE    | apolipoprotein E [Source:HGNC Symbol;Acc:HGNC:613]                                                        |
| LRP1    | LDL receptor related protein 1 [Source:HGNC Symbol;Acc:HGNC:6692]                                         |
| ABCA1   | ATP binding cassette subfamily A member 1 [Source:HGNC Symbol;Acc:HGNC:29]                                |
| ABCB11  | ATP binding cassette subfamily B member 11 [Source:HGNC Symbol;Acc:HGNC:42]                               |
| ABCG5   | ATP binding cassette subfamily G member 5 [Source:HGNC Symbol;Acc:HGNC:13886]                             |
| ABCG8   | ATP binding cassette subfamily G member 8 [Source:HGNC Symbol;Acc:HGNC:13887]                             |
| TSPO    | translocator protein [Source:HGNC Symbol;Acc:HGNC:1158]                                                   |
| VDAC1   | voltage dependent anion channel 1 [Source:HGNC Symbol;Acc:HGNC:12669]                                     |
| VAPA    | VAMP associated protein A [Source:HGNC Symbol;Acc:HGNC:12648]                                             |
| LRP2    | LDL receptor related protein 2 [Source:HGNC Symbol;Acc:HGNC:6694]                                         |
| APOA2   | apolipoprotein A2 [Source:HGNC Symbol;Acc:HGNC:601]                                                       |
| APOC3   | apolipoprotein C3 [Source:HGNC Symbol;Acc:HGNC:610]                                                       |
| APOA4   | apolipoprotein A4 [Source:HGNC Symbol;Acc:HGNC:602]                                                       |
| PLTP    | phospholipid transfer protein [Source:HGNC Symbol;Acc:HGNC:9093]                                          |
| ANGPTL4 | angiopoietin like 4 [Source:HGNC Symbol;Acc:HGNC:16039]                                                   |
| LPA     | lipoprotein(a) [Source:HGNC Symbol;Acc:HGNC:6667]                                                         |
| VAPB    | VAMP (vesicle-associated membrane protein)-associated protein B and C [Source:HGNC Symbol;Acc:HGNC:12649] |
| NPC1    | NPC intracellular cholesterol transporter 1 [Source:HGNC Symbol;Acc:HGNC:7897]                            |
| SORT1   | sortilin 1 [Source:HGNC Symbol;Acc:HGNC:11186]                                                            |
| LDLR    | low density lipoprotein receptor [Source:HGNC Symbol;Acc:HGNC:6547]                                       |
| LDLRAP1 | low density lipoprotein receptor adaptor protein 1 [Source:HGNC Symbol;Acc:HGNC:18640]                    |
| PCSK9   | proprotein convertase subtilisin/kexin type 9 [Source:HGNC Symbol;Acc:HGNC:20001]                         |
| NPC2    | NPC intracellular cholesterol transporter 2 [Source:HGNC Symbol;Acc:HGNC:14537]                           |
| SCARB1  | scavenger receptor class B member 1 [Source:HGNC Symbol;Acc:HGNC:1664]                                    |
| NCEH1   | neutral cholesterol ester hydrolase 1 [Source:HGNC Symbol;Acc:HGNC:29260]                                 |
| APOB    | apolipoprotein B [Source:HGNC Symbol;Acc:HGNC:603]                                                        |
| VDAC2   | voltage dependent anion channel 2 [Source:HGNC Symbol;Acc:HGNC:12672]                                     |
| VDAC3   | voltage dependent anion channel 3 [Source:HGNC Symbol;Acc:HGNC:12674]                                     |
| CETP    | cholesteryl ester transfer protein [Source:HGNC Symbol;Acc:HGNC:1869]                                     |
| STAR    | steroidogenic acute regulatory protein [Source:HGNC Symbol;Acc:HGNC:11359]                                |
| APOH    | apolipoprotein H [Source:HGNC Symbol;Acc:HGNC:616]                                                        |
| OSBPL5  | oxysterol binding protein like 5 [Source:HGNC Symbol;Acc:HGNC:16392]                                      |
| LIPC    | lipase C, hepatic type [Source:HGNC Symbol;Acc:HGNC:6619]                                                 |
| LIPG    | lipase G, endothelial type [Source:HGNC Symbol;Acc:HGNC:6623]                                             |
| APOC1   | apolipoprotein C1 [Source:HGNC Symbol;Acc:HGNC:607]                                                       |
| APOC2   | apolipoprotein C2 [Source:HGNC Symbol;Acc:HGNC:609]                                                       |

|          |                                                                                                                 |
|----------|-----------------------------------------------------------------------------------------------------------------|
| ANGPTL3  | angiopoietin like 3 [Source:HGNC Symbol;Acc:HGNC:491]                                                           |
| ANGPTL8  | angiopoietin like 8 [Source:HGNC Symbol;Acc:HGNC:24933]                                                         |
| LRPAP1   | LDL receptor related protein associated protein 1 [Source:HGNC Symbol;Acc:HGNC:6701]                            |
| STARD3   | StAR related lipid transfer domain containing 3 [Source:HGNC Symbol;Acc:HGNC:17579]                             |
| MYLIP    | myosin regulatory light chain interacting protein [Source:HGNC Symbol;Acc:HGNC:21155]                           |
| SOAT1    | sterol O-acyltransferase 1 [Source:HGNC Symbol;Acc:HGNC:11177]                                                  |
| AKR1C4   | aldo-keto reductase family 1 member C4 [Source:HGNC Symbol;Acc:HGNC:387]                                        |
| HSD17B1  | hydroxysteroid 17-beta dehydrogenase 1 [Source:HGNC Symbol;Acc:HGNC:5210]                                       |
| HSD3B1   | hydroxy-delta-5-steroid dehydrogenase, 3 beta- and steroid delta-isomerase 1 [Source:HGNC Symbol;Acc:HGNC:5217] |
| HSD11B2  | hydroxysteroid 11-beta dehydrogenase 2 [Source:HGNC Symbol;Acc:HGNC:5209]                                       |
| AKR1C2   | aldo-keto reductase family 1 member C2 [Source:HGNC Symbol;Acc:HGNC:385]                                        |
| AKR1C1   | aldo-keto reductase family 1 member C1 [Source:HGNC Symbol;Acc:HGNC:384]                                        |
| AKR1D1   | aldo-keto reductase family 1 member D1 [Source:HGNC Symbol;Acc:HGNC:388]                                        |
| CYP11B1  | cytochrome P450 family 11 subfamily B member 1 [Source:HGNC Symbol;Acc:HGNC:2591]                               |
| CYP11A1  | cytochrome P450 family 11 subfamily A member 1 [Source:HGNC Symbol;Acc:HGNC:2590]                               |
| COMT     | catechol-O-methyltransferase [Source:HGNC Symbol;Acc:HGNC:2228]                                                 |
| SULT1E1  | sulfotransferase family 1E member 1 [Source:HGNC Symbol;Acc:HGNC:11377]                                         |
| STS      | steroid sulfatase (microsomal), isozyme S [Source:HGNC Symbol;Acc:HGNC:11425]                                   |
| AKR1C3   | aldo-keto reductase family 1 member C3 [Source:HGNC Symbol;Acc:HGNC:386]                                        |
| CYP1A1   | cytochrome P450 family 1 subfamily A member 1 [Source:HGNC Symbol;Acc:HGNC:2595]                                |
| CYP1A2   | cytochrome P450 family 1 subfamily A member 2 [Source:HGNC Symbol;Acc:HGNC:2596]                                |
| CYP1B1   | cytochrome P450 family 1 subfamily B member 1 [Source:HGNC Symbol;Acc:HGNC:2597]                                |
| CYP2B6   | cytochrome P450 family 2 subfamily B member 6 [Source:HGNC Symbol;Acc:HGNC:2615]                                |
| CYP2D6   | cytochrome P450 family 2 subfamily D member 6 [Source:HGNC Symbol;Acc:HGNC:2625]                                |
| CYP2E1   | cytochrome P450 family 2 subfamily E member 1 [Source:HGNC Symbol;Acc:HGNC:2631]                                |
| CYP11B2  | cytochrome P450 family 11 subfamily B member 2 [Source:HGNC Symbol;Acc:HGNC:2592]                               |
| HSD17B3  | hydroxysteroid 17-beta dehydrogenase 3 [Source:HGNC Symbol;Acc:HGNC:5212]                                       |
| SRD5A1   | steroid 5 alpha-reductase 1 [Source:HGNC Symbol;Acc:HGNC:11284]                                                 |
| SRD5A2   | steroid 5 alpha-reductase 2 [Source:HGNC Symbol;Acc:HGNC:11285]                                                 |
| SRD5A3   | steroid 5 alpha-reductase 3 [Source:HGNC Symbol;Acc:HGNC:25812]                                                 |
| HSD17B2  | hydroxysteroid 17-beta dehydrogenase 2 [Source:HGNC Symbol;Acc:HGNC:5211]                                       |
| HSD17B6  | hydroxysteroid 17-beta dehydrogenase 6 [Source:HGNC Symbol;Acc:HGNC:23316]                                      |
| HSD17B8  | hydroxysteroid 17-beta dehydrogenase 8 [Source:HGNC Symbol;Acc:HGNC:3554]                                       |
| HSD17B7  | hydroxysteroid 17-beta dehydrogenase 7 [Source:HGNC Symbol;Acc:HGNC:5215]                                       |
| HSD11B1  | hydroxysteroid 11-beta dehydrogenase 1 [Source:HGNC Symbol;Acc:HGNC:5208]                                       |
| CYP3A4   | cytochrome P450 family 3 subfamily A member 4 [Source:HGNC Symbol;Acc:HGNC:2637]                                |
| CYP3A5   | cytochrome P450 family 3 subfamily A member 5 [Source:HGNC Symbol;Acc:HGNC:2638]                                |
| CYP3A7   | cytochrome P450 family 3 subfamily A member 7 [Source:HGNC Symbol;Acc:HGNC:2640]                                |
| DHRS11   | dehydrogenase/reductase 11 [Source:HGNC Symbol;Acc:HGNC:28639]                                                  |
| HSD17B12 | hydroxysteroid 17-beta dehydrogenase 12 [Source:HGNC Symbol;Acc:HGNC:18646]                                     |
| CYP19A1  | cytochrome P450 family 19 subfamily A member 1 [Source:HGNC Symbol;Acc:HGNC:2594]                               |

|         |                                                                                                                                                     |
|---------|-----------------------------------------------------------------------------------------------------------------------------------------------------|
| CYP17A1 | cytochrome P450 family 17 subfamily A member 1 [Source:HGNC Symbol;Acc:HGNC:2593]                                                                   |
| CYP21A2 | cytochrome P450 family 21 subfamily A member 2 [Source:HGNC Symbol;Acc:HGNC:2600]                                                                   |
| CYP2C9  | cytochrome P450 family 2 subfamily C member 9 [Source:HGNC Symbol;Acc:HGNC:2623]                                                                    |
| CYP2C18 | cytochrome P450 family 2 subfamily C member 18 [Source:HGNC Symbol;Acc:HGNC:2620]                                                                   |
| CYP2C19 | cytochrome P450 family 2 subfamily C member 19 [Source:HGNC Symbol;Acc:HGNC:2621]                                                                   |
| CYP2C8  | cytochrome P450 family 2 subfamily C member 8 [Source:HGNC Symbol;Acc:HGNC:2622]                                                                    |
| CYP3A43 | cytochrome P450 family 3 subfamily A member 43 [Source:HGNC Symbol;Acc:HGNC:17450]                                                                  |
| HADH    | hydroxyacyl-CoA dehydrogenase [Source:HGNC Symbol;Acc:HGNC:4799]                                                                                    |
| ACADS   | acyl-CoA dehydrogenase, C-2 to C-3 short chain [Source:HGNC Symbol;Acc:HGNC:90]                                                                     |
| ACADM   | acyl-CoA dehydrogenase, C-4 to C-12 straight chain [Source:HGNC Symbol;Acc:HGNC:89]                                                                 |
| ACADL   | acyl-CoA dehydrogenase, long chain [Source:HGNC Symbol;Acc:HGNC:88]                                                                                 |
| MCAT    | malonyl-CoA-acyl carrier protein transacylase [Source:HGNC Symbol;Acc:HGNC:29622]                                                                   |
| PPT1    | palmitoyl-protein thioesterase 1 [Source:HGNC Symbol;Acc:HGNC:9325]                                                                                 |
| GPR3    | G protein-coupled receptor 3 [Source:HGNC Symbol;Acc:HGNC:4484]                                                                                     |
| ACAA2   | acetyl-CoA acyltransferase 2 [Source:HGNC Symbol;Acc:HGNC:83]                                                                                       |
| HADHB   | hydroxyacyl-CoA dehydrogenase/3-ketoacyl-CoA thiolase/enoyl-CoA hydratase (trifunctional protein), beta subunit [Source:HGNC Symbol;Acc:HGNC:4803]  |
| ECHS1   | enoyl-CoA hydratase, short chain, 1, mitochondrial [Source:HGNC Symbol;Acc:HGNC:3151]                                                               |
| MECR    | mitochondrial trans-2-enoyl-CoA reductase [Source:HGNC Symbol;Acc:HGNC:19691]                                                                       |
| ACAA1   | acetyl-CoA acyltransferase 1 [Source:HGNC Symbol;Acc:HGNC:82]                                                                                       |
| EHHADH  | enoyl-CoA, hydratase/3-hydroxyacyl CoA dehydrogenase [Source:HGNC Symbol;Acc:HGNC:3247]                                                             |
| HADHA   | hydroxyacyl-CoA dehydrogenase/3-ketoacyl-CoA thiolase/enoyl-CoA hydratase (trifunctional protein), alpha subunit [Source:HGNC Symbol;Acc:HGNC:4801] |
| SCP2    | sterol carrier protein 2 [Source:HGNC Symbol;Acc:HGNC:10606]                                                                                        |
| CPT2    | carnitine palmitoyltransferase 2 [Source:HGNC Symbol;Acc:HGNC:2330]                                                                                 |
| ACADVL  | acyl-CoA dehydrogenase, very long chain [Source:HGNC Symbol;Acc:HGNC:92]                                                                            |
| ELOVL6  | ELOVL fatty acid elongase 6 [Source:HGNC Symbol;Acc:HGNC:15829]                                                                                     |
| ELOVL2  | ELOVL fatty acid elongase 2 [Source:HGNC Symbol;Acc:HGNC:14416]                                                                                     |
| FADS1   | fatty acid desaturase 1 [Source:HGNC Symbol;Acc:HGNC:3574]                                                                                          |
| FADS2   | fatty acid desaturase 2 [Source:HGNC Symbol;Acc:HGNC:3575]                                                                                          |
| ELOVL5  | ELOVL fatty acid elongase 5 [Source:HGNC Symbol;Acc:HGNC:21308]                                                                                     |
| ELOVL1  | ELOVL fatty acid elongase 1 [Source:HGNC Symbol;Acc:HGNC:14418]                                                                                     |
| ELOVL3  | ELOVL fatty acid elongase 3 [Source:HGNC Symbol;Acc:HGNC:18047]                                                                                     |
| ELOVL4  | ELOVL fatty acid elongase 4 [Source:HGNC Symbol;Acc:HGNC:14415]                                                                                     |
| ELOVL7  | ELOVL fatty acid elongase 7 [Source:HGNC Symbol;Acc:HGNC:26292]                                                                                     |
| TECR    | trans-2,3-enoyl-CoA reductase [Source:HGNC Symbol;Acc:HGNC:4551]                                                                                    |
| CBR4    | carbonyl reductase 4 [Source:HGNC Symbol;Acc:HGNC:25891]                                                                                            |
| HSD17B4 | hydroxysteroid 17-beta dehydrogenase 4 [Source:HGNC Symbol;Acc:HGNC:5213]                                                                           |
| ACSF3   | acyl-CoA synthetase family member 3 [Source:HGNC Symbol;Acc:HGNC:27288]                                                                             |
| ACSL5   | acyl-CoA synthetase long-chain family member 5 [Source:HGNC Symbol;Acc:HGNC:16526]                                                                  |
| FADS3   | fatty acid desaturase 3 [Source:HGNC Symbol;Acc:HGNC:3576]                                                                                          |

|          |                                                                                                    |
|----------|----------------------------------------------------------------------------------------------------|
| SCD5     | stearoyl-CoA desaturase 5 [Source:HGNC Symbol;Acc:HGNC:21088]                                      |
| FADS6    | fatty acid desaturase 6 [Source:HGNC Symbol;Acc:HGNC:30459]                                        |
| DEGS1    | delta(4)-desaturase, sphingolipid 1 [Source:HGNC Symbol;Acc:HGNC:13709]                            |
| DEGS2    | delta(4)-desaturase, sphingolipid 2 [Source:HGNC Symbol;Acc:HGNC:20113]                            |
| HACD1    | 3-hydroxyacyl-CoA dehydratase 1 [Source:HGNC Symbol;Acc:HGNC:9639]                                 |
| HACD2    | 3-hydroxyacyl-CoA dehydratase 2 [Source:HGNC Symbol;Acc:HGNC:9640]                                 |
| HACD3    | 3-hydroxyacyl-CoA dehydratase 3 [Source:HGNC Symbol;Acc:HGNC:24175]                                |
| HACD4    | 3-hydroxyacyl-CoA dehydratase 4 [Source:HGNC Symbol;Acc:HGNC:20920]                                |
| PAAF1    | proteasomal ATPase associated factor 1 [Source:HGNC Symbol;Acc:HGNC:25687]                         |
| TMED10   | transmembrane p24 trafficking protein 10 [Source:HGNC Symbol;Acc:HGNC:16998]                       |
| SEC22B   | SEC22 homolog B, vesicle trafficking protein (gene/pseudogene) [Source:HGNC Symbol;Acc:HGNC:10700] |
| STX3     | syntaxin 3 [Source:HGNC Symbol;Acc:HGNC:11438]                                                     |
| NAPA     | NSF attachment protein alpha [Source:HGNC Symbol;Acc:HGNC:7641]                                    |
| TMED9    | transmembrane p24 trafficking protein 9 [Source:HGNC Symbol;Acc:HGNC:24878]                        |
| STX4     | syntaxin 4 [Source:HGNC Symbol;Acc:HGNC:11439]                                                     |
| GOLGA2   | golgin A2 [Source:HGNC Symbol;Acc:HGNC:4425]                                                       |
| VAMP3    | vesicle associated membrane protein 3 [Source:HGNC Symbol;Acc:HGNC:12644]                          |
| YKT6     | YKT6 v-SNARE homolog (S. cerevisiae) [Source:HGNC Symbol;Acc:HGNC:16959]                           |
| PSMD4    | proteasome 26S subunit, non-ATPase 4 [Source:HGNC Symbol;Acc:HGNC:9561]                            |
| HSP90AA1 | heat shock protein 90kDa alpha family class A member 1 [Source:HGNC Symbol;Acc:HGNC:5253]          |
| SEC22A   | SEC22 homolog A, vesicle trafficking protein [Source:HGNC Symbol;Acc:HGNC:20260]                   |
| SNAP23   | synaptosome associated protein 23 [Source:HGNC Symbol;Acc:HGNC:11131]                              |
| ACBD3    | acyl-CoA binding domain containing 3 [Source:HGNC Symbol;Acc:HGNC:15453]                           |
| ACBD5    | acyl-CoA binding domain containing 5 [Source:HGNC Symbol;Acc:HGNC:23338]                           |
| PHB2     | prohibitin 2 [Source:HGNC Symbol;Acc:HGNC:30306]                                                   |
| SNX18    | sorting nexin 18 [Source:HGNC Symbol;Acc:HGNC:19245]                                               |
| TGM2     | transglutaminase 2 [Source:HGNC Symbol;Acc:HGNC:11778]                                             |
| TRIM16   | tripartite motif containing 16 [Source:HGNC Symbol;Acc:HGNC:17241]                                 |
| VCP      | valosin containing protein [Source:HGNC Symbol;Acc:HGNC:12666]                                     |
| EI24     | EI24, autophagy associated transmembrane protein [Source:HGNC Symbol;Acc:HGNC:13276]               |
| EPG5     | ectopic P-granules autophagy protein 5 homolog (C. elegans) [Source:HGNC Symbol;Acc:HGNC:29331]    |
| LGALS3   | galectin 3 [Source:HGNC Symbol;Acc:HGNC:6563]                                                      |
| SNX4     | sorting nexin 4 [Source:HGNC Symbol;Acc:HGNC:11175]                                                |
| TOLLIP   | toll interacting protein [Source:HGNC Symbol;Acc:HGNC:16476]                                       |
| RAB11A   | RAB11A, member RAS oncogene family [Source:HGNC Symbol;Acc:HGNC:9760]                              |
| SNX3     | sorting nexin 3 [Source:HGNC Symbol;Acc:HGNC:11174]                                                |
| WDFY3    | WD repeat and FYVE domain containing 3 [Source:HGNC Symbol;Acc:HGNC:20751]                         |
| TRIM10   | tripartite motif containing 10 [Source:HGNC Symbol;Acc:HGNC:10072]                                 |
| IL1A     | interleukin 1 alpha [Source:HGNC Symbol;Acc:HGNC:5991]                                             |

|          |                                                                                                                                     |
|----------|-------------------------------------------------------------------------------------------------------------------------------------|
| ANXA1    | annexin A1 [Source:HGNC Symbol;Acc:HGNC:533]                                                                                        |
| HSP90AB1 | heat shock protein 90kDa alpha family class B member 1 [Source:HGNC Symbol;Acc:HGNC:5258]                                           |
| GORASP2  | golgi reassembly stacking protein 2 [Source:HGNC Symbol;Acc:HGNC:17500]                                                             |
| MGMT     | O-6-methylguanine-DNA methyltransferase [Source:HGNC Symbol;Acc:HGNC:7059]                                                          |
| RAB3A    | RAB3A, member RAS oncogene family [Source:HGNC Symbol;Acc:HGNC:9777]                                                                |
| CAMK2A   | calcium/calmodulin dependent protein kinase II alpha [Source:HGNC Symbol;Acc:HGNC:1460]                                             |
| GNAO1    | G protein subunit alpha o1 [Source:HGNC Symbol;Acc:HGNC:4389]                                                                       |
| PACSIN1  | protein kinase C and casein kinase substrate in neurons 1 [Source:HGNC Symbol;Acc:HGNC:8570]                                        |
| STX1B    | syntaxin 1B [Source:HGNC Symbol;Acc:HGNC:18539]                                                                                     |
| SYN1     | synapsin I [Source:HGNC Symbol;Acc:HGNC:11494]                                                                                      |
| NQO1     | NAD(P)H quinone dehydrogenase 1 [Source:HGNC Symbol;Acc:HGNC:2874]                                                                  |
| SYN2     | synapsin II [Source:HGNC Symbol;Acc:HGNC:11495]                                                                                     |
| ADM      | adrenomedullin [Source:HGNC Symbol;Acc:HGNC:259]                                                                                    |
| LTF      | lactotransferrin [Source:HGNC Symbol;Acc:HGNC:6720]                                                                                 |
| AK5      | adenylate kinase 5 [Source:HGNC Symbol;Acc:HGNC:365]                                                                                |
| NEFM     | neurofilament, medium polypeptide [Source:HGNC Symbol;Acc:HGNC:7734]                                                                |
| GABRA1   | gamma-aminobutyric acid type A receptor alpha1 subunit [Source:HGNC Symbol;Acc:HGNC:4075]                                           |
| CDR1     | cerebellar degeneration related protein 1 [Source:HGNC Symbol;Acc:HGNC:1798]                                                        |
| CXCL14   | C-X-C motif chemokine ligand 14 [Source:HGNC Symbol;Acc:HGNC:10640]                                                                 |
| PCP4     | Purkinje cell protein 4 [Source:HGNC Symbol;Acc:HGNC:8742]                                                                          |
| SLN      | sarcolipin [Source:HGNC Symbol;Acc:HGNC:11089]                                                                                      |
| POSTN    | periostin [Source:HGNC Symbol;Acc:HGNC:16953]                                                                                       |
| SAA2     | serum amyloid A2 [Source:HGNC Symbol;Acc:HGNC:10514]                                                                                |
| STC1     | stanniocalcin 1 [Source:HGNC Symbol;Acc:HGNC:11373]                                                                                 |
| SOD2     | superoxide dismutase 2, mitochondrial [Source:HGNC Symbol;Acc:HGNC:11180]                                                           |
| STMN1    | stathmin 1 [Source:HGNC Symbol;Acc:HGNC:6510]                                                                                       |
| MAPT     | microtubule associated protein tau [Source:HGNC Symbol;Acc:HGNC:6893]                                                               |
| SRSF3    | serine and arginine rich splicing factor 3 [Source:HGNC Symbol;Acc:HGNC:10785]                                                      |
| SMARCC2  | SWI/SNF related, matrix associated, actin dependent regulator of chromatin subfamily c member 2 [Source:HGNC Symbol;Acc:HGNC:11105] |
| SAA1     | serum amyloid A1 [Source:HGNC Symbol;Acc:HGNC:10513]                                                                                |
| GBP2     | guanylate binding protein 2 [Source:HGNC Symbol;Acc:HGNC:4183]                                                                      |
| CHI3L2   | chitinase 3 like 2 [Source:HGNC Symbol;Acc:HGNC:1933]                                                                               |
| ENPP5    | ectonucleotide pyrophosphatase/phosphodiesterase 5 (putative) [Source:HGNC Symbol;Acc:HGNC:13717]                                   |
| SLC1A2   | solute carrier family 1 member 2 [Source:HGNC Symbol;Acc:HGNC:10940]                                                                |
| CHRNA1   | cholinergic receptor nicotinic alpha 1 subunit [Source:HGNC Symbol;Acc:HGNC:1955]                                                   |
| SLC4A4   | solute carrier family 4 member 4 [Source:HGNC Symbol;Acc:HGNC:11030]                                                                |
| OLFM1    | olfactomedin 1 [Source:HGNC Symbol;Acc:HGNC:17187]                                                                                  |
| LUM      | lumican [Source:HGNC Symbol;Acc:HGNC:6724]                                                                                          |
| CSMD3    | CUB and Sushi multiple domains 3 [Source:HGNC Symbol;Acc:HGNC:19291]                                                                |

|           |                                                                                                       |
|-----------|-------------------------------------------------------------------------------------------------------|
| GABRB2    | gamma-aminobutyric acid type A receptor beta2 subunit [Source:HGNC Symbol;Acc:HGNC:4082]              |
| SLC17A7   | solute carrier family 17 member 7 [Source:HGNC Symbol;Acc:HGNC:16704]                                 |
| FAM180A   | family with sequence similarity 180 member A [Source:HGNC Symbol;Acc:HGNC:33773]                      |
| LMO3      | LIM domain only 3 [Source:HGNC Symbol;Acc:HGNC:6643]                                                  |
| VSNL1     | visinin like 1 [Source:HGNC Symbol;Acc:HGNC:12722]                                                    |
| BRINP1    | BMP/retinoic acid inducible neural specific 1 [Source:HGNC Symbol;Acc:HGNC:2687]                      |
| SYT1      | synaptotagmin 1 [Source:HGNC Symbol;Acc:HGNC:11509]                                                   |
| CRYM      | crystallin mu [Source:HGNC Symbol;Acc:HGNC:2418]                                                      |
| MBP       | myelin basic protein [Source:HGNC Symbol;Acc:HGNC:6925]                                               |
| ATP1A3    | ATPase Na <sup>+</sup> /K <sup>+</sup> transporting subunit alpha 3 [Source:HGNC Symbol;Acc:HGNC:801] |
| BASP1     | brain abundant membrane attached signal protein 1 [Source:HGNC Symbol;Acc:HGNC:957]                   |
| GOT1      | glutamic-oxaloacetic transaminase 1 [Source:HGNC Symbol;Acc:HGNC:4432]                                |
| HIST1H2BJ | histone cluster 1, H2bj [Source:HGNC Symbol;Acc:HGNC:4761]                                            |
| MAOB      | monoamine oxidase B [Source:HGNC Symbol;Acc:HGNC:6834]                                                |
| STXBP1    | syntaxin binding protein 1 [Source:HGNC Symbol;Acc:HGNC:11444]                                        |
| TERT      | telomerase reverse transcriptase [Source:HGNC Symbol;Acc:HGNC:11730]                                  |
| CPLX1     | complexin 1 [Source:HGNC Symbol;Acc:HGNC:2309]                                                        |
| STX1A     | syntaxin 1A [Source:HGNC Symbol;Acc:HGNC:11433]                                                       |
| SNAP25    | synaptosome associated protein 25 [Source:HGNC Symbol;Acc:HGNC:11132]                                 |
| SLC18A2   | solute carrier family 18 member A2 [Source:HGNC Symbol;Acc:HGNC:10935]                                |
| RIMS1     | regulating synaptic membrane exocytosis 1 [Source:HGNC Symbol;Acc:HGNC:17282]                         |
| UNC13B    | unc-13 homolog B (C. elegans) [Source:HGNC Symbol;Acc:HGNC:12566]                                     |
| TSPOAP1   | TSPO associated protein 1 [Source:HGNC Symbol;Acc:HGNC:16831]                                         |
| SYN3      | synapsin III [Source:HGNC Symbol;Acc:HGNC:11496]                                                      |
| VAMP2     | vesicle associated membrane protein 2 [Source:HGNC Symbol;Acc:HGNC:12643]                             |
| ADAP1     | ArfGAP with dual PH domains 1 [Source:HGNC Symbol;Acc:HGNC:16486]                                     |
| TAB2      | TGF-beta activated kinase 1/MAP3K7 binding protein 2 [Source:HGNC Symbol;Acc:HGNC:17075]              |
| NCOR1     | nuclear receptor corepressor 1 [Source:HGNC Symbol;Acc:HGNC:7672]                                     |
| BCL3      | B-cell CLL/lymphoma 3 [Source:HGNC Symbol;Acc:HGNC:998]                                               |
| TGFBI     | transforming growth factor beta induced [Source:HGNC Symbol;Acc:HGNC:11771]                           |
| LOX       | lysyl oxidase [Source:HGNC Symbol;Acc:HGNC:6664]                                                      |
| VDR       | vitamin D (1,25- dihydroxyvitamin D3) receptor [Source:HGNC Symbol;Acc:HGNC:12679]                    |
| MMP7      | matrix metalloproteinase 7 [Source:HGNC Symbol;Acc:HGNC:7174]                                         |
| HOXD3     | homeobox D3 [Source:HGNC Symbol;Acc:HGNC:5137]                                                        |
| SOX10     | SRY-box 10 [Source:HGNC Symbol;Acc:HGNC:11190]                                                        |
| CDKN1C    | cyclin dependent kinase inhibitor 1C [Source:HGNC Symbol;Acc:HGNC:1786]                               |
| HDAC2     | histone deacetylase 2 [Source:HGNC Symbol;Acc:HGNC:4853]                                              |
| EPHB1     | EPH receptor B1 [Source:HGNC Symbol;Acc:HGNC:3392]                                                    |
| PTPRA     | protein tyrosine phosphatase, receptor type A [Source:HGNC Symbol;Acc:HGNC:9664]                      |
| SOX9      | SRY-box 9 [Source:HGNC Symbol;Acc:HGNC:11204]                                                         |
| PAX6      | paired box 6 [Source:HGNC Symbol;Acc:HGNC:8620]                                                       |

|          |                                                                                                                  |
|----------|------------------------------------------------------------------------------------------------------------------|
| MEOX2    | mesenchyme homeobox 2 [Source:HGNC Symbol;Acc:HGNC:7014]                                                         |
| SPHK1    | sphingosine kinase 1 [Source:HGNC Symbol;Acc:HGNC:11240]                                                         |
| ATM      | ATM serine/threonine kinase [Source:HGNC Symbol;Acc:HGNC:795]                                                    |
| EEF2     | eukaryotic translation elongation factor 2 [Source:HGNC Symbol;Acc:HGNC:3214]                                    |
| CEND1    | cell cycle exit and neuronal differentiation 1 [Source:HGNC Symbol;Acc:HGNC:24153]                               |
| CRYAB    | crystallin alpha B [Source:HGNC Symbol;Acc:HGNC:2389]                                                            |
| HSP90B1  | heat shock protein 90kDa beta family member 1 [Source:HGNC Symbol;Acc:HGNC:12028]                                |
| LGALS8   | galectin 8 [Source:HGNC Symbol;Acc:HGNC:6569]                                                                    |
| GRASP    | GRP1 (general receptor for phosphoinositides 1)-associated scaffold protein [Source:HGNC Symbol;Acc:HGNC:18707]  |
| VTI1A    | vesicle transport through interaction with t-SNAREs 1A [Source:HGNC Symbol;Acc:HGNC:17792]                       |
| VTI1B    | vesicle transport through interaction with t-SNAREs 1B [Source:HGNC Symbol;Acc:HGNC:17793]                       |
| MRC1     | mannose receptor, C type 1 [Source:HGNC Symbol;Acc:HGNC:7228]                                                    |
| SCFD2    | sec1 family domain containing 2 [Source:HGNC Symbol;Acc:HGNC:30676]                                              |
| VAMP7    | vesicle associated membrane protein 7 [Source:HGNC Symbol;Acc:HGNC:11486]                                        |
| VAMP1    | vesicle associated membrane protein 1 [Source:HGNC Symbol;Acc:HGNC:12642]                                        |
| VAMP4    | vesicle associated membrane protein 4 [Source:HGNC Symbol;Acc:HGNC:12645]                                        |
| VAMP5    | vesicle associated membrane protein 5 [Source:HGNC Symbol;Acc:HGNC:12646]                                        |
| BAAT     | bile acid-CoA:amino acid N-acyltransferase [Source:HGNC Symbol;Acc:HGNC:932]                                     |
| CYP8B1   | cytochrome P450 family 8 subfamily B member 1 [Source:HGNC Symbol;Acc:HGNC:2653]                                 |
| CYP39A1  | cytochrome P450 family 39 subfamily A member 1 [Source:HGNC Symbol;Acc:HGNC:17449]                               |
| CYP46A1  | cytochrome P450 family 46 subfamily A member 1 [Source:HGNC Symbol;Acc:HGNC:2641]                                |
| ACOX2    | acyl-CoA oxidase 2 [Source:HGNC Symbol;Acc:HGNC:120]                                                             |
| CH25H    | cholesterol 25-hydroxylase [Source:HGNC Symbol;Acc:HGNC:1907]                                                    |
| HSD3B7   | hydroxy-delta-5-steroid dehydrogenase, 3 beta- and steroid delta-isomerase 7 [Source:HGNC Symbol;Acc:HGNC:18324] |
| ACOT8    | acyl-CoA thioesterase 8 [Source:HGNC Symbol;Acc:HGNC:15919]                                                      |
| AMACR    | alpha-methylacyl-CoA racemase [Source:HGNC Symbol;Acc:HGNC:451]                                                  |
| CYP7B1   | cytochrome P450 family 7 subfamily B member 1 [Source:HGNC Symbol;Acc:HGNC:2652]                                 |
| ACOT4    | acyl-CoA thioesterase 4 [Source:HGNC Symbol;Acc:HGNC:19748]                                                      |
| NR3C2    | nuclear receptor subfamily 3 group C member 2 [Source:HGNC Symbol;Acc:HGNC:7979]                                 |
| DGAT1    | diacylglycerol O-acyltransferase 1 [Source:HGNC Symbol;Acc:HGNC:2843]                                            |
| DGAT2    | diacylglycerol O-acyltransferase 2 [Source:HGNC Symbol;Acc:HGNC:16940]                                           |
| CEL      | carboxyl ester lipase [Source:HGNC Symbol;Acc:HGNC:1848]                                                         |
| PNLIPRP1 | pancreatic lipase related protein 1 [Source:HGNC Symbol;Acc:HGNC:9156]                                           |
| LIPF     | lipase F, gastric type [Source:HGNC Symbol;Acc:HGNC:6622]                                                        |
| GOT2     | glutamic-oxaloacetic transaminase 2 [Source:HGNC Symbol;Acc:HGNC:4433]                                           |
| MGAT3    | mannosyl (beta-1,4-)-glycoprotein beta-1,4-N-acetylglucosaminyltransferase [Source:HGNC Symbol;Acc:HGNC:7046]    |
| MGAT2    | mannosyl (alpha-1,6-)-glycoprotein beta-1,2-N-acetylglucosaminyltransferase [Source:HGNC Symbol;Acc:HGNC:7045]   |
| CLPS     | colipase [Source:HGNC Symbol;Acc:HGNC:2085]                                                                      |
| NPC1L1   | NPC1 like intracellular cholesterol transporter 1 [Source:HGNC Symbol;Acc:HGNC:7898]                             |



|          |                                                                                                             |
|----------|-------------------------------------------------------------------------------------------------------------|
| MTTP     | microsomal triglyceride transfer protein [Source:HGNC Symbol;Acc:HGNC:7467]                                 |
| AGPAT1   | 1-acylglycerol-3-phosphate O-acyltransferase 1 [Source:HGNC Symbol;Acc:HGNC:324]                            |
| AGPAT2   | 1-acylglycerol-3-phosphate O-acyltransferase 2 [Source:HGNC Symbol;Acc:HGNC:325]                            |
| MOGAT2   | monoacylglycerol O-acyltransferase 2 [Source:HGNC Symbol;Acc:HGNC:23248]                                    |
| MOGAT3   | monoacylglycerol O-acyltransferase 3 [Source:HGNC Symbol;Acc:HGNC:23249]                                    |
| PLPP1    | phospholipid phosphatase 1 [Source:HGNC Symbol;Acc:HGNC:9228]                                               |
| PLPP2    | phospholipid phosphatase 2 [Source:HGNC Symbol;Acc:HGNC:9230]                                               |
| PNLIP    | pancreatic lipase [Source:HGNC Symbol;Acc:HGNC:9155]                                                        |
| PLA2G2A  | phospholipase A2 group IIA [Source:HGNC Symbol;Acc:HGNC:9031]                                               |
| PLA2G2C  | phospholipase A2 group IIC [Source:HGNC Symbol;Acc:HGNC:9032]                                               |
| PLA2G2D  | phospholipase A2 group IID [Source:HGNC Symbol;Acc:HGNC:9033]                                               |
| PLA2G2E  | phospholipase A2 group IIE [Source:HGNC Symbol;Acc:HGNC:13414]                                              |
| PLA2G2F  | phospholipase A2 group IIF [Source:HGNC Symbol;Acc:HGNC:30040]                                              |
| PNLIPRP3 | pancreatic lipase related protein 3 [Source:HGNC Symbol;Acc:HGNC:23492]                                     |
| ATP1B1   | ATPase Na <sup>+</sup> /K <sup>+</sup> transporting subunit beta 1 [Source:HGNC Symbol;Acc:HGNC:804]        |
| AGTR1    | angiotensin II receptor type 1 [Source:HGNC Symbol;Acc:HGNC:336]                                            |
| MC2R     | melanocortin 2 receptor [Source:HGNC Symbol;Acc:HGNC:6930]                                                  |
| OCA2     | OCA2 melanosomal transmembrane protein [Source:HGNC Symbol;Acc:HGNC:8101]                                   |
| ATF2     | activating transcription factor 2 [Source:HGNC Symbol;Acc:HGNC:784]                                         |
| NR4A1    | nuclear receptor subfamily 4 group A member 1 [Source:HGNC Symbol;Acc:HGNC:7980]                            |
| CAMK2B   | calcium/calmodulin dependent protein kinase II beta [Source:HGNC Symbol;Acc:HGNC:1461]                      |
| KCNK3    | potassium two pore domain channel subfamily K member 3 [Source:HGNC Symbol;Acc:HGNC:6278]                   |
| KCNK9    | potassium two pore domain channel subfamily K member 9 [Source:HGNC Symbol;Acc:HGNC:6283]                   |
| KCNJ5    | potassium voltage-gated channel subfamily J member 5 [Source:HGNC Symbol;Acc:HGNC:6266]                     |
| POMC     | proopiomelanocortin [Source:HGNC Symbol;Acc:HGNC:9201]                                                      |
| ATP2A2   | ATPase sarcoplasmic/endoplasmic reticulum Ca <sup>2+</sup> transporting 2 [Source:HGNC Symbol;Acc:HGNC:812] |
| CAMK4    | calcium/calmodulin dependent protein kinase IV [Source:HGNC Symbol;Acc:HGNC:1464]                           |
| PRKD1    | protein kinase D1 [Source:HGNC Symbol;Acc:HGNC:9407]                                                        |
| LIPE     | lipase E, hormone sensitive type [Source:HGNC Symbol;Acc:HGNC:6621]                                         |
| NR4A2    | nuclear receptor subfamily 4 group A member 2 [Source:HGNC Symbol;Acc:HGNC:7981]                            |
| CAMK1    | calcium/calmodulin dependent protein kinase I [Source:HGNC Symbol;Acc:HGNC:1459]                            |
| CREB5    | cAMP responsive element binding protein 5 [Source:HGNC Symbol;Acc:HGNC:16844]                               |
| CREB3    | cAMP responsive element binding protein 3 [Source:HGNC Symbol;Acc:HGNC:2347]                                |
| ATF6B    | activating transcription factor 6 beta [Source:HGNC Symbol;Acc:HGNC:2349]                                   |
| ATF1     | activating transcription factor 1 [Source:HGNC Symbol;Acc:HGNC:783]                                         |
| AGT      | angiotensinogen [Source:HGNC Symbol;Acc:HGNC:333]                                                           |
| NPR1     | natriuretic peptide receptor 1 [Source:HGNC Symbol;Acc:HGNC:7943]                                           |
| NPPA     | natriuretic peptide A [Source:HGNC Symbol;Acc:HGNC:7939]                                                    |
| ORAI1    | ORAI calcium release-activated calcium modulator 1 [Source:HGNC Symbol;Acc:HGNC:25896]                      |

|         |                                                                                                                      |
|---------|----------------------------------------------------------------------------------------------------------------------|
| PDE2A   | phosphodiesterase 2A [Source:HGNC Symbol;Acc:HGNC:8777]                                                              |
| ATP1A2  | ATPase Na <sup>+</sup> /K <sup>+</sup> transporting subunit alpha 2 [Source:HGNC Symbol;Acc:HGNC:800]                |
| ATP1A1  | ATPase Na <sup>+</sup> /K <sup>+</sup> transporting subunit alpha 1 [Source:HGNC Symbol;Acc:HGNC:799]                |
| ATP1A4  | ATPase Na <sup>+</sup> /K <sup>+</sup> transporting subunit alpha 4 [Source:HGNC Symbol;Acc:HGNC:14073]              |
| CACNA1A | calcium voltage-gated channel subunit alpha1 A [Source:HGNC Symbol;Acc:HGNC:1388]                                    |
| CACNA1B | calcium voltage-gated channel subunit alpha1 B [Source:HGNC Symbol;Acc:HGNC:1389]                                    |
| CACNA1C | calcium voltage-gated channel subunit alpha1 C [Source:HGNC Symbol;Acc:HGNC:1390]                                    |
| CACNA1E | calcium voltage-gated channel subunit alpha1 E [Source:HGNC Symbol;Acc:HGNC:1392]                                    |
| CACNA1F | calcium voltage-gated channel subunit alpha1 F [Source:HGNC Symbol;Acc:HGNC:1393]                                    |
| CACNA1G | calcium voltage-gated channel subunit alpha1 G [Source:HGNC Symbol;Acc:HGNC:1394]                                    |
| CACNA1H | calcium voltage-gated channel subunit alpha1 H [Source:HGNC Symbol;Acc:HGNC:1395]                                    |
| CACNA1I | calcium voltage-gated channel subunit alpha1 I [Source:HGNC Symbol;Acc:HGNC:1396]                                    |
| CACNA1S | calcium voltage-gated channel subunit alpha1 S [Source:HGNC Symbol;Acc:HGNC:1397]                                    |
| CALM1   | calmodulin 1 (phosphorylase kinase, delta) [Source:HGNC Symbol;Acc:HGNC:1442]                                        |
| CALM2   | calmodulin 2 (phosphorylase kinase, delta) [Source:HGNC Symbol;Acc:HGNC:1445]                                        |
| CALM3   | calmodulin 3 (phosphorylase kinase, delta) [Source:HGNC Symbol;Acc:HGNC:1449]                                        |
| DAGLA   | diacylglycerol lipase alpha [Source:HGNC Symbol;Acc:HGNC:1165]                                                       |
| DAGLB   | diacylglycerol lipase beta [Source:HGNC Symbol;Acc:HGNC:28923]                                                       |
| LRAT    | lecithin retinol acyltransferase (phosphatidylcholine--retinol O-acyltransferase) [Source:HGNC Symbol;Acc:HGNC:6685] |
| BTBD    | biotinidase [Source:HGNC Symbol;Acc:HGNC:1122]                                                                       |
| ABCC1   | ATP binding cassette subfamily C member 1 [Source:HGNC Symbol;Acc:HGNC:51]                                           |
| AWAT2   | acyl-CoA wax alcohol acyltransferase 2 [Source:HGNC Symbol;Acc:HGNC:23251]                                           |
| SLC5A6  | solute carrier family 5 member 6 [Source:HGNC Symbol;Acc:HGNC:11041]                                                 |
| FOLH1   | folate hydrolase (prostate-specific membrane antigen) 1 [Source:HGNC Symbol;Acc:HGNC:3788]                           |
| SLC19A1 | solute carrier family 19 member 1 [Source:HGNC Symbol;Acc:HGNC:10937]                                                |
| SLC19A2 | solute carrier family 19 member 2 [Source:HGNC Symbol;Acc:HGNC:10938]                                                |
| SLC19A3 | solute carrier family 19 member 3 [Source:HGNC Symbol;Acc:HGNC:16266]                                                |
| SLC23A1 | solute carrier family 23 member 1 [Source:HGNC Symbol;Acc:HGNC:10974]                                                |
| SLC46A1 | solute carrier family 46 member 1 [Source:HGNC Symbol;Acc:HGNC:30521]                                                |
| GIF     | gastric intrinsic factor [Source:HGNC Symbol;Acc:HGNC:4268]                                                          |
| CUBN    | cubilin [Source:HGNC Symbol;Acc:HGNC:2548]                                                                           |
| LMBRD1  | LMBR1 domain containing 1 [Source:HGNC Symbol;Acc:HGNC:23038]                                                        |
| MMACHC  | methylmalonic aciduria (cobalamin deficiency) cblC type, with homocystinuria [Source:HGNC Symbol;Acc:HGNC:24525]     |
| TCN2    | transcobalamin 2 [Source:HGNC Symbol;Acc:HGNC:11653]                                                                 |
| SLC52A3 | solute carrier family 52 member 3 [Source:HGNC Symbol;Acc:HGNC:16187]                                                |
| PLB1    | phospholipase B1 [Source:HGNC Symbol;Acc:HGNC:30041]                                                                 |
| RBP2    | retinol binding protein 2 [Source:HGNC Symbol;Acc:HGNC:9920]                                                         |
| DHCR7   | 7-dehydrocholesterol reductase [Source:HGNC Symbol;Acc:HGNC:2860]                                                    |
| TM7SF2  | transmembrane 7 superfamily member 2 [Source:HGNC Symbol;Acc:HGNC:11863]                                             |
| SC5D    | sterol-C5-desaturase [Source:HGNC Symbol;Acc:HGNC:10547]                                                             |

|         |                                                                                                      |
|---------|------------------------------------------------------------------------------------------------------|
| FDFT1   | farnesyl-diphosphate farnesyltransferase 1 [Source:HGNC Symbol;Acc:HGNC:3629]                        |
| EBP     | emopamil binding protein (sterol isomerase) [Source:HGNC Symbol;Acc:HGNC:3133]                       |
| LSS     | lanosterol synthase (2,3-oxidosqualene-lanosterol cyclase) [Source:HGNC Symbol;Acc:HGNC:6708]        |
| CYP51A1 | cytochrome P450 family 51 subfamily A member 1 [Source:HGNC Symbol;Acc:HGNC:2649]                    |
| CYP2R1  | cytochrome P450 family 2 subfamily R member 1 [Source:HGNC Symbol;Acc:HGNC:20580]                    |
| CYP24A1 | cytochrome P450 family 24 subfamily A member 1 [Source:HGNC Symbol;Acc:HGNC:2602]                    |
| CYP27B1 | cytochrome P450 family 27 subfamily B member 1 [Source:HGNC Symbol;Acc:HGNC:2606]                    |
| NSDHL   | NAD(P) dependent steroid dehydrogenase-like [Source:HGNC Symbol;Acc:HGNC:13398]                      |
| DHCR24  | 24-dehydrocholesterol reductase [Source:HGNC Symbol;Acc:HGNC:2859]                                   |
| KCNH6   | potassium voltage-gated channel subfamily H member 6 [Source:HGNC Symbol;Acc:HGNC:18862]             |
| LBR     | lamin B receptor [Source:HGNC Symbol;Acc:HGNC:6518]                                                  |
| SOAT2   | sterol O-acyltransferase 2 [Source:HGNC Symbol;Acc:HGNC:11178]                                       |
| KCNA4   | potassium voltage-gated channel subfamily A member 4 [Source:HGNC Symbol;Acc:HGNC:6222]              |
| KCNK2   | potassium two pore domain channel subfamily K member 2 [Source:HGNC Symbol;Acc:HGNC:6277]            |
| NR5A1   | nuclear receptor subfamily 5 group A member 1 [Source:HGNC Symbol;Acc:HGNC:7983]                     |
| NR0B1   | nuclear receptor subfamily 0 group B member 1 [Source:HGNC Symbol;Acc:HGNC:7960]                     |
| PBX1    | PBX homeobox 1 [Source:HGNC Symbol;Acc:HGNC:8632]                                                    |
| PDE8A   | phosphodiesterase 8A [Source:HGNC Symbol;Acc:HGNC:8793]                                              |
| PDE8B   | phosphodiesterase 8B [Source:HGNC Symbol;Acc:HGNC:8794]                                              |
| ALOX5   | arachidonate 5-lipoxygenase [Source:HGNC Symbol;Acc:HGNC:435]                                        |
| FSHR    | follicle stimulating hormone receptor [Source:HGNC Symbol;Acc:HGNC:3969]                             |
| LHCGR   | luteinizing hormone/choriogonadotropin receptor [Source:HGNC Symbol;Acc:HGNC:6585]                   |
| FSHB    | follicle stimulating hormone beta subunit [Source:HGNC Symbol;Acc:HGNC:3964]                         |
| BMP15   | bone morphogenetic protein 15 [Source:HGNC Symbol;Acc:HGNC:1068]                                     |
| LHB     | luteinizing hormone beta polypeptide [Source:HGNC Symbol;Acc:HGNC:6584]                              |
| CGA     | glycoprotein hormones, alpha polypeptide [Source:HGNC Symbol;Acc:HGNC:1885]                          |
| KAT5    | lysine acetyltransferase 5 [Source:HGNC Symbol;Acc:HGNC:5275]                                        |
| ACOT1   | acyl-CoA thioesterase 1 [Source:HGNC Symbol;Acc:HGNC:33128]                                          |
| ACOT2   | acyl-CoA thioesterase 2 [Source:HGNC Symbol;Acc:HGNC:18431]                                          |
| PLA2G4A | phospholipase A2 group IVA [Source:HGNC Symbol;Acc:HGNC:9035]                                        |
| PTGS2   | prostaglandin-endoperoxide synthase 2 [Source:HGNC Symbol;Acc:HGNC:9605]                             |
| CYP2J2  | cytochrome P450 family 2 subfamily J member 2 [Source:HGNC Symbol;Acc:HGNC:2634]                     |
| HMGCR   | 3-hydroxy-3-methylglutaryl-CoA reductase [Source:HGNC Symbol;Acc:HGNC:5006]                          |
| EPHX1   | epoxide hydrolase 1 [Source:HGNC Symbol;Acc:HGNC:3401]                                               |
| FXYD2   | FXYD domain containing ion transport regulator 2 [Source:HGNC Symbol;Acc:HGNC:4026]                  |
| ATP1B3  | ATPase Na <sup>+</sup> /K <sup>+</sup> transporting subunit beta 3 [Source:HGNC Symbol;Acc:HGNC:806] |
| SCTR    | secretin receptor [Source:HGNC Symbol;Acc:HGNC:10608]                                                |
| KCNN2   | potassium calcium-activated channel subfamily N member 2 [Source:HGNC Symbol;Acc:HGNC:6291]          |
| SCT     | secretin [Source:HGNC Symbol;Acc:HGNC:10607]                                                         |

|         |                                                                                                           |
|---------|-----------------------------------------------------------------------------------------------------------|
| ABCB1   | ATP binding cassette subfamily B member 1 [Source:HGNC Symbol;Acc:HGNC:40]                                |
| ABCB4   | ATP binding cassette subfamily B member 4 [Source:HGNC Symbol;Acc:HGNC:45]                                |
| ABCC2   | ATP binding cassette subfamily C member 2 [Source:HGNC Symbol;Acc:HGNC:53]                                |
| ABCC3   | ATP binding cassette subfamily C member 3 [Source:HGNC Symbol;Acc:HGNC:54]                                |
| ABCC4   | ATP binding cassette subfamily C member 4 [Source:HGNC Symbol;Acc:HGNC:55]                                |
| ABCG2   | ATP binding cassette subfamily G member 2 (Junior blood group) [Source:HGNC Symbol;Acc:HGNC:74]           |
| SLC22A7 | solute carrier family 22 member 7 [Source:HGNC Symbol;Acc:HGNC:10971]                                     |
| SLC22A8 | solute carrier family 22 member 8 [Source:HGNC Symbol;Acc:HGNC:10972]                                     |
| RXRA    | retinoid X receptor alpha [Source:HGNC Symbol;Acc:HGNC:10477]                                             |
| NR1H4   | nuclear receptor subfamily 1 group H member 4 [Source:HGNC Symbol;Acc:HGNC:7967]                          |
| NR0B2   | nuclear receptor subfamily 0 group B member 2 [Source:HGNC Symbol;Acc:HGNC:7961]                          |
| AQP1    | aquaporin 1 (Colton blood group) [Source:HGNC Symbol;Acc:HGNC:633]                                        |
| AQP4    | aquaporin 4 [Source:HGNC Symbol;Acc:HGNC:637]                                                             |
| AQP8    | aquaporin 8 [Source:HGNC Symbol;Acc:HGNC:642]                                                             |
| AQP9    | aquaporin 9 [Source:HGNC Symbol;Acc:HGNC:643]                                                             |
| SLC9A3  | solute carrier family 9 member A3 [Source:HGNC Symbol;Acc:HGNC:11073]                                     |
| SLC4A5  | solute carrier family 4 member 5 [Source:HGNC Symbol;Acc:HGNC:18168]                                      |
| SLC5A1  | solute carrier family 5 member 1 [Source:HGNC Symbol;Acc:HGNC:11036]                                      |
| SLC10A1 | solute carrier family 10 member 1 [Source:HGNC Symbol;Acc:HGNC:10905]                                     |
| SLC10A2 | solute carrier family 10 member 2 [Source:HGNC Symbol;Acc:HGNC:10906]                                     |
| SLC51A  | solute carrier family 51 alpha subunit [Source:HGNC Symbol;Acc:HGNC:29955]                                |
| SLC51B  | solute carrier family 51 beta subunit [Source:HGNC Symbol;Acc:HGNC:29956]                                 |
| SLC22A1 | solute carrier family 22 member 1 [Source:HGNC Symbol;Acc:HGNC:10963]                                     |
| SLC4A2  | solute carrier family 4 member 2 [Source:HGNC Symbol;Acc:HGNC:11028]                                      |
| SLCO1A2 | solute carrier organic anion transporter family member 1A2 [Source:HGNC Symbol;Acc:HGNC:10956]            |
| SLCO1B1 | solute carrier organic anion transporter family member 1B1 [Source:HGNC Symbol;Acc:HGNC:10959]            |
| SLCO1B3 | solute carrier organic anion transporter family member 1B3 [Source:HGNC Symbol;Acc:HGNC:10961]            |
| SLCO1B7 | solute carrier organic anion transporter family member 1B7 (putative) [Source:HGNC Symbol;Acc:HGNC:32934] |
| SLCO1C1 | solute carrier organic anion transporter family member 1C1 [Source:HGNC Symbol;Acc:HGNC:13819]            |
| SULT2A1 | sulfotransferase family 2A member 1 [Source:HGNC Symbol;Acc:HGNC:11458]                                   |
| SULT2B1 | sulfotransferase family 2B member 1 [Source:HGNC Symbol;Acc:HGNC:11459]                                   |
| PLCG1   | phospholipase C gamma 1 [Source:HGNC Symbol;Acc:HGNC:9065]                                                |
| CASP1   | caspase 1 [Source:HGNC Symbol;Acc:HGNC:1499]                                                              |
| MMP1    | matrix metalloproteinase 1 [Source:HGNC Symbol;Acc:HGNC:7155]                                             |
| MMP3    | matrix metalloproteinase 3 [Source:HGNC Symbol;Acc:HGNC:7173]                                             |
| MMP9    | matrix metalloproteinase 9 [Source:HGNC Symbol;Acc:HGNC:7176]                                             |
| APAF1   | apoptotic peptidase activating factor 1 [Source:HGNC Symbol;Acc:HGNC:576]                                 |
| BAX     | BCL2 associated X protein [Source:HGNC Symbol;Acc:HGNC:959]                                               |

|          |                                                                                                                |
|----------|----------------------------------------------------------------------------------------------------------------|
| CASP3    | caspase 3 [Source:HGNC Symbol;Acc:HGNC:1504]                                                                   |
| TNFRSF1A | tumor necrosis factor receptor superfamily member 1A [Source:HGNC Symbol;Acc:HGNC:11916]                       |
| TRAF2    | TNF receptor associated factor 2 [Source:HGNC Symbol;Acc:HGNC:12032]                                           |
| TRAF3    | TNF receptor associated factor 3 [Source:HGNC Symbol;Acc:HGNC:12033]                                           |
| HSPD1    | heat shock protein family D (Hsp60) member 1 [Source:HGNC Symbol;Acc:HGNC:5261]                                |
| FOS      | Fos proto-oncogene, AP-1 transcription factor subunit [Source:HGNC Symbol;Acc:HGNC:3796]                       |
| FASLG    | Fas ligand [Source:HGNC Symbol;Acc:HGNC:11936]                                                                 |
| CD14     | CD14 molecule [Source:HGNC Symbol;Acc:HGNC:1628]                                                               |
| CASP6    | caspase 6 [Source:HGNC Symbol;Acc:HGNC:1507]                                                                   |
| CASP7    | caspase 7 [Source:HGNC Symbol;Acc:HGNC:1508]                                                                   |
| CASP8    | caspase 8 [Source:HGNC Symbol;Acc:HGNC:1509]                                                                   |
| CASP9    | caspase 9 [Source:HGNC Symbol;Acc:HGNC:1511]                                                                   |
| TAB1     | TGF-beta activated kinase 1/MAP3K7 binding protein 1 [Source:HGNC Symbol;Acc:HGNC:18157]                       |
| MAP2K4   | mitogen-activated protein kinase kinase 4 [Source:HGNC Symbol;Acc:HGNC:6844]                                   |
| MAP2K3   | mitogen-activated protein kinase kinase 3 [Source:HGNC Symbol;Acc:HGNC:6843]                                   |
| MAP2K6   | mitogen-activated protein kinase kinase 6 [Source:HGNC Symbol;Acc:HGNC:6846]                                   |
| NFATC1   | nuclear factor of activated T-cells 1 [Source:HGNC Symbol;Acc:HGNC:7775]                                       |
| JAK2     | Janus kinase 2 [Source:HGNC Symbol;Acc:HGNC:6192]                                                              |
| DDIT3    | DNA damage inducible transcript 3 [Source:HGNC Symbol;Acc:HGNC:2726]                                           |
| CHUK     | conserved helix-loop-helix ubiquitous kinase [Source:HGNC Symbol;Acc:HGNC:1974]                                |
| TNFSF10  | tumor necrosis factor superfamily member 10 [Source:HGNC Symbol;Acc:HGNC:11925]                                |
| BID      | BH3 interacting domain death agonist [Source:HGNC Symbol;Acc:HGNC:1050]                                        |
| MYD88    | myeloid differentiation primary response 88 [Source:HGNC Symbol;Acc:HGNC:7562]                                 |
| IRAK1    | interleukin 1 receptor associated kinase 1 [Source:HGNC Symbol;Acc:HGNC:6112]                                  |
| IRAK4    | interleukin 1 receptor associated kinase 4 [Source:HGNC Symbol;Acc:HGNC:17967]                                 |
| NFKBIA   | NFkB inhibitor alpha [Source:HGNC Symbol;Acc:HGNC:7797]                                                        |
| LBP      | lipopolysaccharide binding protein [Source:HGNC Symbol;Acc:HGNC:6517]                                          |
| LY96     | lymphocyte antigen 96 [Source:HGNC Symbol;Acc:HGNC:17156]                                                      |
| TIRAP    | toll-interleukin 1 receptor (TIR) domain containing adaptor protein [Source:HGNC Symbol;Acc:HGNC:17192]        |
| IL12A    | interleukin 12A [Source:HGNC Symbol;Acc:HGNC:5969]                                                             |
| CCL3     | C-C motif chemokine ligand 3 [Source:HGNC Symbol;Acc:HGNC:10627]                                               |
| IFNA2    | interferon, alpha 2 [Source:HGNC Symbol;Acc:HGNC:5423]                                                         |
| IL12B    | interleukin 12B [Source:HGNC Symbol;Acc:HGNC:5970]                                                             |
| ABCG1    | ATP binding cassette subfamily G member 1 [Source:HGNC Symbol;Acc:HGNC:73]                                     |
| LYN      | LYN proto-oncogene, Src family tyrosine kinase [Source:HGNC Symbol;Acc:HGNC:6735]                              |
| PPP3R1   | protein phosphatase 3 regulatory subunit B, alpha [Source:HGNC Symbol;Acc:HGNC:9317]                           |
| IKKBK    | inhibitor of kappa light polypeptide gene enhancer in B-cells, kinase beta [Source:HGNC Symbol;Acc:HGNC:5960]  |
| IKBK     | inhibitor of kappa light polypeptide gene enhancer in B-cells, kinase gamma [Source:HGNC Symbol;Acc:HGNC:5961] |

|           |                                                                                                                   |
|-----------|-------------------------------------------------------------------------------------------------------------------|
| IKBKE     | inhibitor of kappa light polypeptide gene enhancer in B-cells, kinase epsilon [Source:HGNC Symbol;Acc:HGNC:14552] |
| NCF2      | neutrophil cytosolic factor 2 [Source:HGNC Symbol;Acc:HGNC:7661]                                                  |
| NCF1      | neutrophil cytosolic factor 1 [Source:HGNC Symbol;Acc:HGNC:7660]                                                  |
| NCF4      | neutrophil cytosolic factor 4 [Source:HGNC Symbol;Acc:HGNC:7662]                                                  |
| RXRB      | retinoid X receptor beta [Source:HGNC Symbol;Acc:HGNC:10478]                                                      |
| RXRG      | retinoid X receptor gamma [Source:HGNC Symbol;Acc:HGNC:10479]                                                     |
| OLR1      | oxidized low density lipoprotein receptor 1 [Source:HGNC Symbol;Acc:HGNC:8133]                                    |
| ATF6      | activating transcription factor 6 [Source:HGNC Symbol;Acc:HGNC:791]                                               |
| IRF7      | interferon regulatory factor 7 [Source:HGNC Symbol;Acc:HGNC:6122]                                                 |
| TLR2      | toll like receptor 2 [Source:HGNC Symbol;Acc:HGNC:11848]                                                          |
| TLR4      | toll like receptor 4 [Source:HGNC Symbol;Acc:HGNC:11850]                                                          |
| TLR6      | toll like receptor 6 [Source:HGNC Symbol;Acc:HGNC:16711]                                                          |
| MIB1      | mindbomb E3 ubiquitin protein ligase 1 [Source:HGNC Symbol;Acc:HGNC:21086]                                        |
| ERO1A     | endoplasmic reticulum oxidoreductase alpha [Source:HGNC Symbol;Acc:HGNC:13280]                                    |
| PYCARD    | PYD and CARD domain containing [Source:HGNC Symbol;Acc:HGNC:16608]                                                |
| NFATC2    | nuclear factor of activated T-cells 2 [Source:HGNC Symbol;Acc:HGNC:7776]                                          |
| NFATC3    | nuclear factor of activated T-cells 3 [Source:HGNC Symbol;Acc:HGNC:7777]                                          |
| CYP2A6    | cytochrome P450 family 2 subfamily A member 6 [Source:HGNC Symbol;Acc:HGNC:2610]                                  |
| VLDLR     | very low density lipoprotein receptor [Source:HGNC Symbol;Acc:HGNC:12698]                                         |
| AGER      | advanced glycosylation end product-specific receptor [Source:HGNC Symbol;Acc:HGNC:320]                            |
| CYBA      | cytochrome b-245 alpha chain [Source:HGNC Symbol;Acc:HGNC:2577]                                                   |
| TICAM2    | toll like receptor adaptor molecule 2 [Source:HGNC Symbol;Acc:HGNC:21354]                                         |
| TNFRSF10A | tumor necrosis factor receptor superfamily member 10a [Source:HGNC Symbol;Acc:HGNC:11904]                         |
| TNFRSF10B | tumor necrosis factor receptor superfamily member 10b [Source:HGNC Symbol;Acc:HGNC:11905]                         |
| CXCL2     | C-X-C motif chemokine ligand 2 [Source:HGNC Symbol;Acc:HGNC:4603]                                                 |
| CXCL3     | C-X-C motif chemokine ligand 3 [Source:HGNC Symbol;Acc:HGNC:4604]                                                 |
| POU2F1    | POU class 2 homeobox 1 [Source:HGNC Symbol;Acc:HGNC:9212]                                                         |
| POU2F2    | POU class 2 homeobox 2 [Source:HGNC Symbol;Acc:HGNC:9213]                                                         |
| POU2F3    | POU class 2 homeobox 3 [Source:HGNC Symbol;Acc:HGNC:19864]                                                        |
| HSPA1A    | heat shock protein family A (Hsp70) member 1A [Source:HGNC Symbol;Acc:HGNC:5232]                                  |
| HSPA1B    | heat shock protein family A (Hsp70) member 1B [Source:HGNC Symbol;Acc:HGNC:5233]                                  |
| HSPA1L    | heat shock protein family A (Hsp70) member 1 like [Source:HGNC Symbol;Acc:HGNC:5234]                              |
| MAPK14    | mitogen-activated protein kinase 14 [Source:HGNC Symbol;Acc:HGNC:6876]                                            |
| PPP3CA    | protein phosphatase 3 catalytic subunit alpha [Source:HGNC Symbol;Acc:HGNC:9314]                                  |
| PPP3CB    | protein phosphatase 3 catalytic subunit beta [Source:HGNC Symbol;Acc:HGNC:9315]                                   |
| PPP3CC    | protein phosphatase 3 catalytic subunit gamma [Source:HGNC Symbol;Acc:HGNC:9316]                                  |
| PPP3R2    | protein phosphatase 3 regulatory subunit B, beta [Source:HGNC Symbol;Acc:HGNC:9318]                               |
| MOK       | MOK protein kinase [Source:HGNC Symbol;Acc:HGNC:9833]                                                             |
| TRAM1     | translocation associated membrane protein 1 [Source:HGNC Symbol;Acc:HGNC:20568]                                   |

|                   |                                                                                    |
|-------------------|------------------------------------------------------------------------------------|
| TRAM2             | translocation associated membrane protein 2 [Source:HGNC Symbol;Acc:HGNC:16855]    |
| NOX3              | NADPH oxidase 3 [Source:HGNC Symbol;Acc:HGNC:7890]                                 |
| POU5F1B           | POU class 5 homeobox 1B [Source:HGNC Symbol;Acc:HGNC:9223]                         |
| POU3F1            | POU class 3 homeobox 1 [Source:HGNC Symbol;Acc:HGNC:9214]                          |
| POU3F2            | POU class 3 homeobox 2 [Source:HGNC Symbol;Acc:HGNC:9215]                          |
| POU3F3            | POU class 3 homeobox 3 [Source:HGNC Symbol;Acc:HGNC:9216]                          |
| POU3F4            | POU class 3 homeobox 4 [Source:HGNC Symbol;Acc:HGNC:9217]                          |
| TBCE              | tubulin folding cofactor E [Source:HGNC Symbol;Acc:HGNC:11582]                     |
| THEM4             | thioesterase superfamily member 4 [Source:HGNC Symbol;Acc:HGNC:17947]              |
| ACOT7             | acyl-CoA thioesterase 7 [Source:HGNC Symbol;Acc:HGNC:24157]                        |
| THEM5             | thioesterase superfamily member 5 [Source:HGNC Symbol;Acc:HGNC:26755]              |
| CYP2U1            | cytochrome P450 family 2 subfamily U member 1 [Source:HGNC Symbol;Acc:HGNC:20582]  |
| ACOX1             | acyl-CoA oxidase 1 [Source:HGNC Symbol;Acc:HGNC:119]                               |
| ACOX3             | acyl-CoA oxidase 3, pristanoyl [Source:HGNC Symbol;Acc:HGNC:121]                   |
| ECI1              | enoyl-CoA delta isomerase 1 [Source:HGNC Symbol;Acc:HGNC:2703]                     |
| ECI2              | enoyl-CoA delta isomerase 2 [Source:HGNC Symbol;Acc:HGNC:14601]                    |
| GCDH              | glutaryl-CoA dehydrogenase [Source:HGNC Symbol;Acc:HGNC:4189]                      |
| ACSBG1            | acyl-CoA synthetase bubblegum family member 1 [Source:HGNC Symbol;Acc:HGNC:29567]  |
| ACSBG2            | acyl-CoA synthetase bubblegum family member 2 [Source:HGNC Symbol;Acc:HGNC:24174]  |
| ACSL1             | acyl-CoA synthetase long-chain family member 1 [Source:HGNC Symbol;Acc:HGNC:3569]  |
| ACSL3             | acyl-CoA synthetase long-chain family member 3 [Source:HGNC Symbol;Acc:HGNC:3570]  |
| ACSL4             | acyl-CoA synthetase long-chain family member 4 [Source:HGNC Symbol;Acc:HGNC:3571]  |
| ACSL6             | acyl-CoA synthetase long-chain family member 6 [Source:HGNC Symbol;Acc:HGNC:16496] |
| ALDH1L1           | aldehyde dehydrogenase 1 family member L1 [Source:HGNC Symbol;Acc:HGNC:3978]       |
| ALDH1L2           | aldehyde dehydrogenase 1 family member L2 [Source:HGNC Symbol;Acc:HGNC:26777]      |
| DNMT3A            | DNA (cytosine-5-)-methyltransferase 3 alpha [Source:HGNC Symbol;Acc:HGNC:2978]     |
| CYP4A11           | cytochrome P450 family 4 subfamily A member 11 [Source:HGNC Symbol;Acc:HGNC:2642]  |
| CYP4Z1            | cytochrome P450 family 4 subfamily Z member 1 [Source:HGNC Symbol;Acc:HGNC:20583]  |
| CYP4A22           | cytochrome P450 family 4 subfamily A member 22 [Source:HGNC Symbol;Acc:HGNC:20575] |
| PPID              | peptidylprolyl isomerase D [Source:HGNC Symbol;Acc:HGNC:9257]                      |
| PPIF              | peptidylprolyl isomerase F [Source:HGNC Symbol;Acc:HGNC:9259]                      |
| PPIE              | peptidylprolyl isomerase E [Source:HGNC Symbol;Acc:HGNC:9258]                      |
| SH2D2A            | SH2 domain containing 2A [Source:HGNC Symbol;Acc:HGNC:10821]                       |
| PLCG2             | phospholipase C gamma 2 [Source:HGNC Symbol;Acc:HGNC:9066]                         |
| SPHK2             | sphingosine kinase 2 [Source:HGNC Symbol;Acc:HGNC:18859]                           |
| PLA2G4E           | phospholipase A2 group IVE [Source:HGNC Symbol;Acc:HGNC:24791]                     |
| JMJD7-<br>PLA2G4B | JMJD7-PLA2G4B readthrough [Source:HGNC Symbol;Acc:HGNC:34449]                      |
| PLA2G4B           | phospholipase A2 group IVB [Source:HGNC Symbol;Acc:HGNC:9036]                      |
| PLA2G4C           | phospholipase A2 group IVC [Source:HGNC Symbol;Acc:HGNC:9037]                      |
| PLA2G4D           | phospholipase A2 group IVD [Source:HGNC Symbol;Acc:HGNC:30038]                     |
| PLA2G4F           | phospholipase A2 group IVF [Source:HGNC Symbol;Acc:HGNC:27396]                     |

|          |                                                                                                |
|----------|------------------------------------------------------------------------------------------------|
| MAPK11   | mitogen-activated protein kinase 11 [Source:HGNC Symbol;Acc:HGNC:6873]                         |
| MAPK12   | mitogen-activated protein kinase 12 [Source:HGNC Symbol;Acc:HGNC:6874]                         |
| MAPK13   | mitogen-activated protein kinase 13 [Source:HGNC Symbol;Acc:HGNC:6875]                         |
| MAPKAPK2 | mitogen-activated protein kinase-activated protein kinase 2 [Source:HGNC Symbol;Acc:HGNC:6887] |
| MAPKAPK3 | mitogen-activated protein kinase-activated protein kinase 3 [Source:HGNC Symbol;Acc:HGNC:6888] |
| HSPB1    | heat shock protein family B (small) member 1 [Source:HGNC Symbol;Acc:HGNC:5246]                |
| TGFA     | transforming growth factor alpha [Source:HGNC Symbol;Acc:HGNC:11765]                           |
| EREG     | epiregulin [Source:HGNC Symbol;Acc:HGNC:3443]                                                  |
| NGF      | nerve growth factor [Source:HGNC Symbol;Acc:HGNC:7808]                                         |
| BDNF     | brain derived neurotrophic factor [Source:HGNC Symbol;Acc:HGNC:1033]                           |
| NTF3     | neurotrophin 3 [Source:HGNC Symbol;Acc:HGNC:8023]                                              |
| NTF4     | neurotrophin 4 [Source:HGNC Symbol;Acc:HGNC:8024]                                              |
| IGF2     | insulin like growth factor 2 [Source:HGNC Symbol;Acc:HGNC:5466]                                |
| CSF1     | colony stimulating factor 1 [Source:HGNC Symbol;Acc:HGNC:2432]                                 |
| KITLG    | KIT ligand [Source:HGNC Symbol;Acc:HGNC:6343]                                                  |
| FLT3LG   | fms related tyrosine kinase 3 ligand [Source:HGNC Symbol;Acc:HGNC:3766]                        |
| EFNA1    | ephrin A1 [Source:HGNC Symbol;Acc:HGNC:3221]                                                   |
| EFNA2    | ephrin A2 [Source:HGNC Symbol;Acc:HGNC:3222]                                                   |
| EFNA3    | ephrin A3 [Source:HGNC Symbol;Acc:HGNC:3223]                                                   |
| EFNA4    | ephrin A4 [Source:HGNC Symbol;Acc:HGNC:3224]                                                   |
| EFNA5    | ephrin A5 [Source:HGNC Symbol;Acc:HGNC:3225]                                                   |
| ERBB3    | erb-b2 receptor tyrosine kinase 3 [Source:HGNC Symbol;Acc:HGNC:3431]                           |
| NGFR     | nerve growth factor receptor [Source:HGNC Symbol;Acc:HGNC:7809]                                |
| NTRK2    | neurotrophic receptor tyrosine kinase 2 [Source:HGNC Symbol;Acc:HGNC:8032]                     |
| CSF1R    | colony stimulating factor 1 receptor [Source:HGNC Symbol;Acc:HGNC:2433]                        |
| EPHA2    | EPH receptor A2 [Source:HGNC Symbol;Acc:HGNC:3386]                                             |
| SYK      | spleen tyrosine kinase [Source:HGNC Symbol;Acc:HGNC:11491]                                     |
| CD19     | CD19 molecule [Source:HGNC Symbol;Acc:HGNC:1633]                                               |
| PIK3AP1  | phosphoinositide-3-kinase adaptor protein 1 [Source:HGNC Symbol;Acc:HGNC:30034]                |
| GH1      | growth hormone 1 [Source:HGNC Symbol;Acc:HGNC:4261]                                            |
| GH2      | growth hormone 2 [Source:HGNC Symbol;Acc:HGNC:4262]                                            |
| CSH1     | chorionic somatomammotropin hormone 1 [Source:HGNC Symbol;Acc:HGNC:2440]                       |
| CSH2     | chorionic somatomammotropin hormone 2 [Source:HGNC Symbol;Acc:HGNC:2441]                       |
| PRL      | prolactin [Source:HGNC Symbol;Acc:HGNC:9445]                                                   |
| OSM      | oncostatin M [Source:HGNC Symbol;Acc:HGNC:8506]                                                |
| IL2      | interleukin 2 [Source:HGNC Symbol;Acc:HGNC:6001]                                               |
| IL3      | interleukin 3 [Source:HGNC Symbol;Acc:HGNC:6011]                                               |
| IL4      | interleukin 4 [Source:HGNC Symbol;Acc:HGNC:6014]                                               |
| IL7      | interleukin 7 [Source:HGNC Symbol;Acc:HGNC:6023]                                               |
| IFNA1    | interferon, alpha 1 [Source:HGNC Symbol;Acc:HGNC:5417]                                         |



|        |                                                                                 |
|--------|---------------------------------------------------------------------------------|
| IFNA4  | interferon, alpha 4 [Source:HGNC Symbol;Acc:HGNC:5425]                          |
| IFNA5  | interferon alpha 5 [Source:HGNC Symbol;Acc:HGNC:5426]                           |
| IFNA6  | interferon alpha 6 [Source:HGNC Symbol;Acc:HGNC:5427]                           |
| IFNA7  | interferon, alpha 7 [Source:HGNC Symbol;Acc:HGNC:5428]                          |
| IFNA8  | interferon alpha 8 [Source:HGNC Symbol;Acc:HGNC:5429]                           |
| IFNA10 | interferon, alpha 10 [Source:HGNC Symbol;Acc:HGNC:5418]                         |
| IFNA13 | interferon, alpha 13 [Source:HGNC Symbol;Acc:HGNC:5419]                         |
| IFNA14 | interferon alpha 14 [Source:HGNC Symbol;Acc:HGNC:5420]                          |
| IFNA16 | interferon, alpha 16 [Source:HGNC Symbol;Acc:HGNC:5421]                         |
| IFNA17 | interferon, alpha 17 [Source:HGNC Symbol;Acc:HGNC:5422]                         |
| IFNA21 | interferon, alpha 21 [Source:HGNC Symbol;Acc:HGNC:5424]                         |
| EPO    | erythropoietin [Source:HGNC Symbol;Acc:HGNC:3415]                               |
| CSF3   | colony stimulating factor 3 [Source:HGNC Symbol;Acc:HGNC:2438]                  |
| GHR    | growth hormone receptor [Source:HGNC Symbol;Acc:HGNC:4263]                      |
| PRLR   | prolactin receptor [Source:HGNC Symbol;Acc:HGNC:9446]                           |
| OSMR   | oncostatin M receptor [Source:HGNC Symbol;Acc:HGNC:8507]                        |
| IL2RA  | interleukin 2 receptor subunit alpha [Source:HGNC Symbol;Acc:HGNC:6008]         |
| IL2RB  | interleukin 2 receptor subunit beta [Source:HGNC Symbol;Acc:HGNC:6009]          |
| IL2RG  | interleukin 2 receptor subunit gamma [Source:HGNC Symbol;Acc:HGNC:6010]         |
| IL3RA  | interleukin 3 receptor subunit alpha [Source:HGNC Symbol;Acc:HGNC:6012]         |
| IL6R   | interleukin 6 receptor [Source:HGNC Symbol;Acc:HGNC:6019]                       |
| IL4R   | interleukin 4 receptor [Source:HGNC Symbol;Acc:HGNC:6015]                       |
| IL7R   | interleukin 7 receptor [Source:HGNC Symbol;Acc:HGNC:6024]                       |
| IFNAR1 | interferon alpha and beta receptor subunit 1 [Source:HGNC Symbol;Acc:HGNC:5432] |
| IFNAR2 | interferon alpha and beta receptor subunit 2 [Source:HGNC Symbol;Acc:HGNC:5433] |
| EPOR   | erythropoietin receptor [Source:HGNC Symbol;Acc:HGNC:3416]                      |
| CSF3R  | colony stimulating factor 3 receptor [Source:HGNC Symbol;Acc:HGNC:2439]         |
| JAK1   | Janus kinase 1 [Source:HGNC Symbol;Acc:HGNC:6190]                               |
| JAK3   | Janus kinase 3 [Source:HGNC Symbol;Acc:HGNC:6193]                               |
| LPAR3  | lysophosphatidic acid receptor 3 [Source:HGNC Symbol;Acc:HGNC:14298]            |
| LPAR6  | lysophosphatidic acid receptor 6 [Source:HGNC Symbol;Acc:HGNC:15520]            |
| GNB1   | G protein subunit beta 1 [Source:HGNC Symbol;Acc:HGNC:4396]                     |
| GNB2   | G protein subunit beta 2 [Source:HGNC Symbol;Acc:HGNC:4398]                     |
| GNB3   | G protein subunit beta 3 [Source:HGNC Symbol;Acc:HGNC:4400]                     |
| GNB4   | G protein subunit beta 4 [Source:HGNC Symbol;Acc:HGNC:20731]                    |
| GNB5   | G protein subunit beta 5 [Source:HGNC Symbol;Acc:HGNC:4401]                     |
| GNG2   | G protein subunit gamma 2 [Source:HGNC Symbol;Acc:HGNC:4404]                    |
| GNG3   | G protein subunit gamma 3 [Source:HGNC Symbol;Acc:HGNC:4405]                    |
| GNG4   | G protein subunit gamma 4 [Source:HGNC Symbol;Acc:HGNC:4407]                    |
| GNG5   | G protein subunit gamma 5 [Source:HGNC Symbol;Acc:HGNC:4408]                    |
| GNG7   | G protein subunit gamma 7 [Source:HGNC Symbol;Acc:HGNC:4410]                    |

|              |                                                                                                           |
|--------------|-----------------------------------------------------------------------------------------------------------|
| GNG8         | G protein subunit gamma 8 [Source:HGNC Symbol;Acc:HGNC:19664]                                             |
| GNG10        | G protein subunit gamma 10 [Source:HGNC Symbol;Acc:HGNC:4402]                                             |
| GNG11        | G protein subunit gamma 11 [Source:HGNC Symbol;Acc:HGNC:4403]                                             |
| GNG13        | G protein subunit gamma 13 [Source:HGNC Symbol;Acc:HGNC:14131]                                            |
| GNGT1        | G protein subunit gamma transducin 1 [Source:HGNC Symbol;Acc:HGNC:4411]                                   |
| GNGT2        | G protein subunit gamma transducin 2 [Source:HGNC Symbol;Acc:HGNC:4412]                                   |
| PIK3CG       | phosphatidylinositol-4,5-bisphosphate 3-kinase catalytic subunit gamma [Source:HGNC Symbol;Acc:HGNC:8978] |
| PIK3R5       | phosphoinositide-3-kinase regulatory subunit 5 [Source:HGNC Symbol;Acc:HGNC:30035]                        |
| PIK3R6       | phosphoinositide-3-kinase regulatory subunit 6 [Source:HGNC Symbol;Acc:HGNC:27101]                        |
| EIF4E        | eukaryotic translation initiation factor 4E [Source:HGNC Symbol;Acc:HGNC:3287]                            |
| EIF4E2       | eukaryotic translation initiation factor 4E family member 2 [Source:HGNC Symbol;Acc:HGNC:3293]            |
| EIF4E1B      | eukaryotic translation initiation factor 4E family member 1B [Source:HGNC Symbol;Acc:HGNC:33179]          |
| EIF4B        | eukaryotic translation initiation factor 4B [Source:HGNC Symbol;Acc:HGNC:3285]                            |
| RPS6         | ribosomal protein S6 [Source:HGNC Symbol;Acc:HGNC:10429]                                                  |
| PKN1         | protein kinase N1 [Source:HGNC Symbol;Acc:HGNC:9405]                                                      |
| PKN2         | protein kinase N2 [Source:HGNC Symbol;Acc:HGNC:9406]                                                      |
| PKN3         | protein kinase N3 [Source:HGNC Symbol;Acc:HGNC:17999]                                                     |
| SGK1         | serum/glucocorticoid regulated kinase 1 [Source:HGNC Symbol;Acc:HGNC:10810]                               |
| SGK2         | SGK2, serine/threonine kinase 2 [Source:HGNC Symbol;Acc:HGNC:13900]                                       |
| SGK3         | serum/glucocorticoid regulated kinase family member 3 [Source:HGNC Symbol;Acc:HGNC:10812]                 |
| C8orf44-SGK3 | C8orf44-SGK3 readthrough [Source:HGNC Symbol;Acc:HGNC:48354]                                              |
| MAGI2        | membrane associated guanylate kinase, WW and PDZ domain containing 2 [Source:HGNC Symbol;Acc:HGNC:18957]  |
| PPP2R3B      | protein phosphatase 2 regulatory subunit B''beta [Source:HGNC Symbol;Acc:HGNC:13417]                      |
| PPP2R3C      | protein phosphatase 2 regulatory subunit B''gamma [Source:HGNC Symbol;Acc:HGNC:17485]                     |
| PPP2R3A      | protein phosphatase 2 regulatory subunit B''alpha [Source:HGNC Symbol;Acc:HGNC:9307]                      |
| PPP2R5B      | protein phosphatase 2 regulatory subunit B'beta [Source:HGNC Symbol;Acc:HGNC:9310]                        |
| PPP2R5C      | protein phosphatase 2 regulatory subunit B'gamma [Source:HGNC Symbol;Acc:HGNC:9311]                       |
| PPP2R5D      | protein phosphatase 2 regulatory subunit B'delta [Source:HGNC Symbol;Acc:HGNC:9312]                       |
| PPP2R5E      | protein phosphatase 2 regulatory subunit B'epsilon [Source:HGNC Symbol;Acc:HGNC:9313]                     |
| PPP2R5A      | protein phosphatase 2 regulatory subunit B'alpha [Source:HGNC Symbol;Acc:HGNC:9309]                       |
| CDC37        | cell division cycle 37 [Source:HGNC Symbol;Acc:HGNC:1735]                                                 |
| CRTC2        | CREB regulated transcription coactivator 2 [Source:HGNC Symbol;Acc:HGNC:27301]                            |
| PHLPP1       | PH domain and leucine rich repeat protein phosphatase 1 [Source:HGNC Symbol;Acc:HGNC:20610]               |
| PHLPP2       | PH domain and leucine rich repeat protein phosphatase 2 [Source:HGNC Symbol;Acc:HGNC:29149]               |
| TCL1A        | T-cell leukemia/lymphoma 1A [Source:HGNC Symbol;Acc:HGNC:11648]                                           |
| TCL1B        | T-cell leukemia/lymphoma 1B [Source:HGNC Symbol;Acc:HGNC:11649]                                           |

|         |                                                                                                                    |
|---------|--------------------------------------------------------------------------------------------------------------------|
| MTCP1   | mature T-cell proliferation 1 [Source:HGNC Symbol;Acc:HGNC:7423]                                                   |
| CDKN1B  | cyclin dependent kinase inhibitor 1B [Source:HGNC Symbol;Acc:HGNC:1785]                                            |
| CDK2    | cyclin dependent kinase 2 [Source:HGNC Symbol;Acc:HGNC:1771]                                                       |
| CDK6    | cyclin dependent kinase 6 [Source:HGNC Symbol;Acc:HGNC:1777]                                                       |
| CCNE1   | cyclin E1 [Source:HGNC Symbol;Acc:HGNC:1589]                                                                       |
| CCNE2   | cyclin E2 [Source:HGNC Symbol;Acc:HGNC:1590]                                                                       |
| RBL2    | RB transcriptional corepressor like 2 [Source:HGNC Symbol;Acc:HGNC:9894]                                           |
| BCL2L11 | BCL2 like 11 [Source:HGNC Symbol;Acc:HGNC:994]                                                                     |
| YWHAZ   | tyrosine 3-monooxygenase/tryptophan 5-monooxygenase activation protein zeta [Source:HGNC Symbol;Acc:HGNC:12855]    |
| YWHAB   | tyrosine 3-monooxygenase/tryptophan 5-monooxygenase activation protein beta [Source:HGNC Symbol;Acc:HGNC:12849]    |
| YWHAE   | tyrosine 3-monooxygenase/tryptophan 5-monooxygenase activation protein epsilon [Source:HGNC Symbol;Acc:HGNC:12851] |
| YWHAH   | tyrosine 3-monooxygenase/tryptophan 5-monooxygenase activation protein eta [Source:HGNC Symbol;Acc:HGNC:12853]     |
| YWHAG   | tyrosine 3-monooxygenase/tryptophan 5-monooxygenase activation protein gamma [Source:HGNC Symbol;Acc:HGNC:12852]   |
| CREB3L1 | cAMP responsive element binding protein 3 like 1 [Source:HGNC Symbol;Acc:HGNC:18856]                               |
| CREB3L2 | cAMP responsive element binding protein 3 like 2 [Source:HGNC Symbol;Acc:HGNC:23720]                               |
| CREB3L3 | cAMP responsive element binding protein 3 like 3 [Source:HGNC Symbol;Acc:HGNC:18855]                               |
| CREB3L4 | cAMP responsive element binding protein 3 like 4 [Source:HGNC Symbol;Acc:HGNC:18854]                               |
| MCL1    | myeloid cell leukemia 1 [Source:HGNC Symbol;Acc:HGNC:6943]                                                         |
| MYB     | MYB proto-oncogene, transcription factor [Source:HGNC Symbol;Acc:HGNC:7545]                                        |
| GAB1    | GRB2 associated binding protein 1 [Source:HGNC Symbol;Acc:HGNC:4066]                                               |
| GAB2    | GRB2 associated binding protein 2 [Source:HGNC Symbol;Acc:HGNC:14458]                                              |
| PTPN11  | protein tyrosine phosphatase, non-receptor type 11 [Source:HGNC Symbol;Acc:HGNC:9644]                              |
| RASGRP1 | RAS guanyl releasing protein 1 [Source:HGNC Symbol;Acc:HGNC:9878]                                                  |
| RASGRP2 | RAS guanyl releasing protein 2 [Source:HGNC Symbol;Acc:HGNC:9879]                                                  |
| RASGRP3 | RAS guanyl releasing protein 3 [Source:HGNC Symbol;Acc:HGNC:14545]                                                 |
| RASGRP4 | RAS guanyl releasing protein 4 [Source:HGNC Symbol;Acc:HGNC:18958]                                                 |
| ZAP70   | zeta chain of T cell receptor associated protein kinase 70kDa [Source:HGNC Symbol;Acc:HGNC:12858]                  |
| LAT     | linker for activation of T-cells [Source:HGNC Symbol;Acc:HGNC:18874]                                               |
| HTR7    | 5-hydroxytryptamine receptor 7 [Source:HGNC Symbol;Acc:HGNC:5302]                                                  |
| RASGRF2 | Ras protein specific guanine nucleotide releasing factor 2 [Source:HGNC Symbol;Acc:HGNC:9876]                      |
| GRIN1   | glutamate ionotropic receptor NMDA type subunit 1 [Source:HGNC Symbol;Acc:HGNC:4584]                               |
| GRIN2A  | glutamate ionotropic receptor NMDA type subunit 2A [Source:HGNC Symbol;Acc:HGNC:4585]                              |
| GRIN2B  | glutamate ionotropic receptor NMDA type subunit 2B [Source:HGNC Symbol;Acc:HGNC:4586]                              |
| CALML3  | calmodulin like 3 [Source:HGNC Symbol;Acc:HGNC:1452]                                                               |
| CALML6  | calmodulin like 6 [Source:HGNC Symbol;Acc:HGNC:24193]                                                              |
| CALML5  | calmodulin like 5 [Source:HGNC Symbol;Acc:HGNC:18180]                                                              |
| CALML4  | calmodulin like 4 [Source:HGNC Symbol;Acc:HGNC:18445]                                                              |

|          |                                                                                           |
|----------|-------------------------------------------------------------------------------------------|
| RASA1    | RAS p21 protein activator 1 [Source:HGNC Symbol;Acc:HGNC:9871]                            |
| RASA2    | RAS p21 protein activator 2 [Source:HGNC Symbol;Acc:HGNC:9872]                            |
| RASA3    | RAS p21 protein activator 3 [Source:HGNC Symbol;Acc:HGNC:20331]                           |
| RASA4    | RAS p21 protein activator 4 [Source:HGNC Symbol;Acc:HGNC:23181]                           |
| RASA4B   | RAS p21 protein activator 4B [Source:HGNC Symbol;Acc:HGNC:35202]                          |
| SYNGAP1  | synaptic Ras GTPase activating protein 1 [Source:HGNC Symbol;Acc:HGNC:11497]              |
| RASAL1   | RAS protein activator like 1 [Source:HGNC Symbol;Acc:HGNC:9873]                           |
| RASAL2   | RAS protein activator like 2 [Source:HGNC Symbol;Acc:HGNC:9874]                           |
| RASAL3   | RAS protein activator like 3 [Source:HGNC Symbol;Acc:HGNC:26129]                          |
| RASSF1   | Ras association domain family member 1 [Source:HGNC Symbol;Acc:HGNC:9882]                 |
| RASSF5   | Ras association domain family member 5 [Source:HGNC Symbol;Acc:HGNC:17609]                |
| SHOC2    | SHOC2, leucine rich repeat scaffold protein [Source:HGNC Symbol;Acc:HGNC:15454]           |
| PLA1A    | phospholipase A1 member A [Source:HGNC Symbol;Acc:HGNC:17661]                             |
| PLA2G10  | phospholipase A2 group X [Source:HGNC Symbol;Acc:HGNC:9029]                               |
| PLA2G3   | phospholipase A2 group III [Source:HGNC Symbol;Acc:HGNC:17934]                            |
| PLA2G12A | phospholipase A2 group XIIA [Source:HGNC Symbol;Acc:HGNC:18554]                           |
| PLA2G12B | phospholipase A2 group XIIB [Source:HGNC Symbol;Acc:HGNC:18555]                           |
| PLA2G1B  | phospholipase A2 group IB [Source:HGNC Symbol;Acc:HGNC:9030]                              |
| PLA2G5   | phospholipase A2 group V [Source:HGNC Symbol;Acc:HGNC:9038]                               |
| PLA2G6   | phospholipase A2 group VI [Source:HGNC Symbol;Acc:HGNC:9039]                              |
| ETS1     | ETS proto-oncogene 1, transcription factor [Source:HGNC Symbol;Acc:HGNC:3488]             |
| ETS2     | ETS proto-oncogene 2, transcription factor [Source:HGNC Symbol;Acc:HGNC:3489]             |
| BRAP     | BRCA1 associated protein [Source:HGNC Symbol;Acc:HGNC:1099]                               |
| KSR1     | kinase suppressor of ras 1 [Source:HGNC Symbol;Acc:HGNC:6465]                             |
| KSR2     | kinase suppressor of ras 2 [Source:HGNC Symbol;Acc:HGNC:18610]                            |
| RAPGEF5  | Rap guanine nucleotide exchange factor 5 [Source:HGNC Symbol;Acc:HGNC:16862]              |
| RALGDS   | ral guanine nucleotide dissociation stimulator [Source:HGNC Symbol;Acc:HGNC:9842]         |
| RGL1     | ral guanine nucleotide dissociation stimulator like 1 [Source:HGNC Symbol;Acc:HGNC:30281] |
| RGL2     | ral guanine nucleotide dissociation stimulator like 2 [Source:HGNC Symbol;Acc:HGNC:9769]  |
| RALA     | RALA Ras like proto-oncogene A [Source:HGNC Symbol;Acc:HGNC:9839]                         |
| RALB     | RALB Ras like proto-oncogene B [Source:HGNC Symbol;Acc:HGNC:9840]                         |
| EXOC2    | exocyst complex component 2 [Source:HGNC Symbol;Acc:HGNC:24968]                           |
| REL      | REL proto-oncogene, NF-kB subunit [Source:HGNC Symbol;Acc:HGNC:9954]                      |
| PLD1     | phospholipase D1 [Source:HGNC Symbol;Acc:HGNC:9067]                                       |
| PLD2     | phospholipase D2 [Source:HGNC Symbol;Acc:HGNC:9068]                                       |
| RALBP1   | ralA binding protein 1 [Source:HGNC Symbol;Acc:HGNC:9841]                                 |
| PLCE1    | phospholipase C epsilon 1 [Source:HGNC Symbol;Acc:HGNC:17175]                             |
| RIN1     | Ras and Rab interactor 1 [Source:HGNC Symbol;Acc:HGNC:18749]                              |
| ABL2     | ABL proto-oncogene 2, non-receptor tyrosine kinase [Source:HGNC Symbol;Acc:HGNC:77]       |
| RAB5A    | RAB5A, member RAS oncogene family [Source:HGNC Symbol;Acc:HGNC:9783]                      |
| RAB5B    | RAB5B, member RAS oncogene family [Source:HGNC Symbol;Acc:HGNC:9784]                      |

|         |                                                                                             |
|---------|---------------------------------------------------------------------------------------------|
| RAB5C   | RAB5C, member RAS oncogene family [Source:HGNC Symbol;Acc:HGNC:9785]                        |
| ARF6    | ADP ribosylation factor 6 [Source:HGNC Symbol;Acc:HGNC:659]                                 |
| PLA2G16 | phospholipase A2 group XVI [Source:HGNC Symbol;Acc:HGNC:17825]                              |
| CHRD    | chordin [Source:HGNC Symbol;Acc:HGNC:1949]                                                  |
| NOG     | noggin [Source:HGNC Symbol;Acc:HGNC:7866]                                                   |
| NBL1    | neuroblastoma 1, DAN family BMP antagonist [Source:HGNC Symbol;Acc:HGNC:7650]               |
| GREM1   | gremlin 1, DAN family BMP antagonist [Source:HGNC Symbol;Acc:HGNC:2001]                     |
| GREM2   | gremlin 2, DAN family BMP antagonist [Source:HGNC Symbol;Acc:HGNC:17655]                    |
| DCN     | decorin [Source:HGNC Symbol;Acc:HGNC:2705]                                                  |
| FMOD    | fibromodulin [Source:HGNC Symbol;Acc:HGNC:3774]                                             |
| LEFTY1  | left-right determination factor 1 [Source:HGNC Symbol;Acc:HGNC:6552]                        |
| LEFTY2  | left-right determination factor 2 [Source:HGNC Symbol;Acc:HGNC:3122]                        |
| FST     | folliculin [Source:HGNC Symbol;Acc:HGNC:3971]                                               |
| INHBB   | inhibin beta B subunit [Source:HGNC Symbol;Acc:HGNC:6067]                                   |
| BMP8A   | bone morphogenetic protein 8a [Source:HGNC Symbol;Acc:HGNC:21650]                           |
| GDF5    | growth differentiation factor 5 [Source:HGNC Symbol;Acc:HGNC:4220]                          |
| GDF6    | growth differentiation factor 6 [Source:HGNC Symbol;Acc:HGNC:4221]                          |
| GDF7    | growth differentiation factor 7 [Source:HGNC Symbol;Acc:HGNC:4222]                          |
| AMH     | anti-Mullerian hormone [Source:HGNC Symbol;Acc:HGNC:464]                                    |
| THSD4   | thrombospondin type 1 domain containing 4 [Source:HGNC Symbol;Acc:HGNC:25835]               |
| FBN1    | fibrillin 1 [Source:HGNC Symbol;Acc:HGNC:3603]                                              |
| LTBP1   | latent transforming growth factor beta binding protein 1 [Source:HGNC Symbol;Acc:HGNC:6714] |
| TGFB2   | transforming growth factor beta 2 [Source:HGNC Symbol;Acc:HGNC:11768]                       |
| TGFB3   | transforming growth factor beta 3 [Source:HGNC Symbol;Acc:HGNC:11769]                       |
| INHBA   | inhibin beta A subunit [Source:HGNC Symbol;Acc:HGNC:6066]                                   |
| INHBC   | inhibin beta C subunit [Source:HGNC Symbol;Acc:HGNC:6068]                                   |
| INHBE   | inhibin beta E subunit [Source:HGNC Symbol;Acc:HGNC:24029]                                  |
| NODAL   | nodal growth differentiation factor [Source:HGNC Symbol;Acc:HGNC:7865]                      |
| HFE2    | hemochromatosis type 2 (juvenile) [Source:HGNC Symbol;Acc:HGNC:4887]                        |
| BMPR1A  | bone morphogenetic protein receptor type 1A [Source:HGNC Symbol;Acc:HGNC:1076]              |
| BMPR1B  | bone morphogenetic protein receptor type 1B [Source:HGNC Symbol;Acc:HGNC:1077]              |
| ACVR1   | activin A receptor type 1 [Source:HGNC Symbol;Acc:HGNC:171]                                 |
| ACVR2A  | activin A receptor type 2A [Source:HGNC Symbol;Acc:HGNC:173]                                |
| RGMA    | repulsive guidance molecule family member a [Source:HGNC Symbol;Acc:HGNC:30308]             |
| RGMB    | repulsive guidance molecule family member b [Source:HGNC Symbol;Acc:HGNC:26896]             |
| AMHR2   | anti-Mullerian hormone receptor type 2 [Source:HGNC Symbol;Acc:HGNC:465]                    |
| ACVR1B  | activin A receptor type 1B [Source:HGNC Symbol;Acc:HGNC:172]                                |
| ACVR2B  | activin A receptor type 2B [Source:HGNC Symbol;Acc:HGNC:174]                                |
| ACVR1C  | activin A receptor type 1C [Source:HGNC Symbol;Acc:HGNC:18123]                              |
| BAMBI   | BMP and activin membrane bound inhibitor [Source:HGNC Symbol;Acc:HGNC:30251]                |
| SMURF1  | SMAD specific E3 ubiquitin protein ligase 1 [Source:HGNC Symbol;Acc:HGNC:16807]             |

|          |                                                                                                |
|----------|------------------------------------------------------------------------------------------------|
| SMURF2   | SMAD specific E3 ubiquitin protein ligase 2 [Source:HGNC Symbol;Acc:HGNC:16809]                |
| ZFYVE9   | zinc finger FYVE-type containing 9 [Source:HGNC Symbol;Acc:HGNC:6775]                          |
| ZFYVE16  | zinc finger FYVE-type containing 16 [Source:HGNC Symbol;Acc:HGNC:20756]                        |
| HAMP     | hepcidin antimicrobial peptide [Source:HGNC Symbol;Acc:HGNC:15598]                             |
| ID1      | inhibitor of DNA binding 1, HLH protein [Source:HGNC Symbol;Acc:HGNC:5360]                     |
| ID2      | inhibitor of DNA binding 2, HLH protein [Source:HGNC Symbol;Acc:HGNC:5361]                     |
| ID3      | inhibitor of DNA binding 3, HLH protein [Source:HGNC Symbol;Acc:HGNC:5362]                     |
| ID4      | inhibitor of DNA binding 4, HLH protein [Source:HGNC Symbol;Acc:HGNC:5363]                     |
| RBL1     | RB transcriptional corepressor like 1 [Source:HGNC Symbol;Acc:HGNC:9893]                       |
| E2F5     | E2F transcription factor 5 [Source:HGNC Symbol;Acc:HGNC:3119]                                  |
| TFDP1    | transcription factor Dp-1 [Source:HGNC Symbol;Acc:HGNC:11749]                                  |
| TGIF1    | TGFB induced factor homeobox 1 [Source:HGNC Symbol;Acc:HGNC:11776]                             |
| TGIF2    | TGFB induced factor homeobox 2 [Source:HGNC Symbol;Acc:HGNC:15764]                             |
| PITX2    | paired like homeodomain 2 [Source:HGNC Symbol;Acc:HGNC:9005]                                   |
| RBX1     | ring-box 1 [Source:HGNC Symbol;Acc:HGNC:9928]                                                  |
| CUL1     | cullin 1 [Source:HGNC Symbol;Acc:HGNC:2551]                                                    |
| SKP1     | S-phase kinase-associated protein 1 [Source:HGNC Symbol;Acc:HGNC:10899]                        |
| MINOS1   | mitochondrial inner membrane organizing system 1 [Source:HGNC Symbol;Acc:HGNC:32068]           |
| IFNGR1   | interferon gamma receptor 1 [Source:HGNC Symbol;Acc:HGNC:5439]                                 |
| IFNGR2   | interferon gamma receptor 2 (interferon gamma transducer 1) [Source:HGNC Symbol;Acc:HGNC:5440] |
| MKNK1    | MAP kinase interacting serine/threonine kinase 1 [Source:HGNC Symbol;Acc:HGNC:7110]            |
| MKNK2    | MAP kinase interacting serine/threonine kinase 2 [Source:HGNC Symbol;Acc:HGNC:7111]            |
| CUL2     | cullin 2 [Source:HGNC Symbol;Acc:HGNC:2552]                                                    |
| ARNT     | aryl hydrocarbon receptor nuclear translocator [Source:HGNC Symbol;Acc:HGNC:700]               |
| CAMK2D   | calcium/calmodulin dependent protein kinase II delta [Source:HGNC Symbol;Acc:HGNC:1462]        |
| CAMK2G   | calcium/calmodulin dependent protein kinase II gamma [Source:HGNC Symbol;Acc:HGNC:1463]        |
| TIMP1    | TIMP metalloproteinase inhibitor 1 [Source:HGNC Symbol;Acc:HGNC:11820]                         |
| LTBR     | lymphotoxin beta receptor [Source:HGNC Symbol;Acc:HGNC:6718]                                   |
| TF       | transferrin [Source:HGNC Symbol;Acc:HGNC:11740]                                                |
| TFRC     | transferrin receptor [Source:HGNC Symbol;Acc:HGNC:11763]                                       |
| SERPINE1 | serpin family E member 1 [Source:HGNC Symbol;Acc:HGNC:8583]                                    |
| EDN1     | endothelin 1 [Source:HGNC Symbol;Acc:HGNC:3176]                                                |
| NOS2     | nitric oxide synthase 2 [Source:HGNC Symbol;Acc:HGNC:7873]                                     |
| HMOX1    | heme oxygenase 1 [Source:HGNC Symbol;Acc:HGNC:5013]                                            |
| TCEB2    | transcription elongation factor B subunit 2 [Source:HGNC Symbol;Acc:HGNC:11619]                |
| TCEB3    | transcription elongation factor B subunit 3 [Source:HGNC Symbol;Acc:HGNC:11620]                |
| CAB39    | calcium binding protein 39 [Source:HGNC Symbol;Acc:HGNC:20292]                                 |
| CAB39L   | calcium binding protein 39 like [Source:HGNC Symbol;Acc:HGNC:20290]                            |
| STRADA   | STE20-related kinase adaptor alpha [Source:HGNC Symbol;Acc:HGNC:30172]                         |
| STRADB   | STE20-related kinase adaptor beta [Source:HGNC Symbol;Acc:HGNC:13205]                          |
| LEP      | leptin [Source:HGNC Symbol;Acc:HGNC:6553]                                                      |

|          |                                                                                                   |
|----------|---------------------------------------------------------------------------------------------------|
| LEPR     | leptin receptor [Source:HGNC Symbol;Acc:HGNC:6554]                                                |
| ADRA1A   | adrenoceptor alpha 1A [Source:HGNC Symbol;Acc:HGNC:277]                                           |
| ADIPOQ   | adiponectin, C1Q and collagen domain containing [Source:HGNC Symbol;Acc:HGNC:13633]               |
| ADIPOR1  | adiponectin receptor 1 [Source:HGNC Symbol;Acc:HGNC:24040]                                        |
| ADIPOR2  | adiponectin receptor 2 [Source:HGNC Symbol;Acc:HGNC:24041]                                        |
| PFKFB1   | 6-phosphofructo-2-kinase/fructose-2,6-biphosphatase 1 [Source:HGNC Symbol;Acc:HGNC:8872]          |
| PFKFB2   | 6-phosphofructo-2-kinase/fructose-2,6-biphosphatase 2 [Source:HGNC Symbol;Acc:HGNC:8873]          |
| PFKFB4   | 6-phosphofructo-2-kinase/fructose-2,6-biphosphatase 4 [Source:HGNC Symbol;Acc:HGNC:8875]          |
| HNF4A    | hepatocyte nuclear factor 4 alpha [Source:HGNC Symbol;Acc:HGNC:5024]                              |
| ELAVL1   | ELAV like RNA binding protein 1 [Source:HGNC Symbol;Acc:HGNC:3312]                                |
| CCNA2    | cyclin A2 [Source:HGNC Symbol;Acc:HGNC:1578]                                                      |
| CCNA1    | cyclin A1 [Source:HGNC Symbol;Acc:HGNC:1577]                                                      |
| EEF2K    | eukaryotic elongation factor 2 kinase [Source:HGNC Symbol;Acc:HGNC:24615]                         |
| SREBF1   | sterol regulatory element binding transcription factor 1 [Source:HGNC Symbol;Acc:HGNC:11289]      |
| MLYCD    | malonyl-CoA decarboxylase [Source:HGNC Symbol;Acc:HGNC:7150]                                      |
| TBC1D1   | TBC1 domain family member 1 [Source:HGNC Symbol;Acc:HGNC:11578]                                   |
| RAB2A    | RAB2A, member RAS oncogene family [Source:HGNC Symbol;Acc:HGNC:9763]                              |
| RAB10    | RAB10, member RAS oncogene family [Source:HGNC Symbol;Acc:HGNC:9759]                              |
| RAB11B   | RAB11B, member RAS oncogene family [Source:HGNC Symbol;Acc:HGNC:9761]                             |
| RAB14    | RAB14, member RAS oncogene family [Source:HGNC Symbol;Acc:HGNC:16524]                             |
| CACNA2D1 | calcium voltage-gated channel auxiliary subunit alpha2delta 1 [Source:HGNC Symbol;Acc:HGNC:1399]  |
| CACNA2D2 | calcium voltage-gated channel auxiliary subunit alpha2delta 2 [Source:HGNC Symbol;Acc:HGNC:1400]  |
| CACNA2D3 | calcium voltage-gated channel auxiliary subunit alpha2delta 3 [Source:HGNC Symbol;Acc:HGNC:15460] |
| CACNA2D4 | calcium voltage-gated channel auxiliary subunit alpha2delta 4 [Source:HGNC Symbol;Acc:HGNC:20202] |
| CACNB1   | calcium voltage-gated channel auxiliary subunit beta 1 [Source:HGNC Symbol;Acc:HGNC:1401]         |
| CACNB2   | calcium voltage-gated channel auxiliary subunit beta 2 [Source:HGNC Symbol;Acc:HGNC:1402]         |
| CACNB3   | calcium voltage-gated channel auxiliary subunit beta 3 [Source:HGNC Symbol;Acc:HGNC:1403]         |
| CACNB4   | calcium voltage-gated channel auxiliary subunit beta 4 [Source:HGNC Symbol;Acc:HGNC:1404]         |
| CACNG1   | calcium voltage-gated channel auxiliary subunit gamma 1 [Source:HGNC Symbol;Acc:HGNC:1405]        |
| CACNG2   | calcium voltage-gated channel auxiliary subunit gamma 2 [Source:HGNC Symbol;Acc:HGNC:1406]        |
| CACNG3   | calcium voltage-gated channel auxiliary subunit gamma 3 [Source:HGNC Symbol;Acc:HGNC:1407]        |
| CACNG4   | calcium voltage-gated channel auxiliary subunit gamma 4 [Source:HGNC Symbol;Acc:HGNC:1408]        |
| CACNG5   | calcium voltage-gated channel auxiliary subunit gamma 5 [Source:HGNC Symbol;Acc:HGNC:1409]        |
| CACNG6   | calcium voltage-gated channel auxiliary subunit gamma 6 [Source:HGNC Symbol;Acc:HGNC:13625]       |

|          |                                                                                                         |
|----------|---------------------------------------------------------------------------------------------------------|
| CACNG7   | calcium voltage-gated channel auxiliary subunit gamma 7 [Source:HGNC Symbol;Acc:HGNC:13626]             |
| CACNG8   | calcium voltage-gated channel auxiliary subunit gamma 8 [Source:HGNC Symbol;Acc:HGNC:13628]             |
| LAMTOR3  | late endosomal/lysosomal adaptor, MAPK and MTOR activator 3 [Source:HGNC Symbol;Acc:HGNC:15606]         |
| RPS6KA3  | ribosomal protein S6 kinase A3 [Source:HGNC Symbol;Acc:HGNC:10432]                                      |
| RPS6KA1  | ribosomal protein S6 kinase A1 [Source:HGNC Symbol;Acc:HGNC:10430]                                      |
| RPS6KA2  | ribosomal protein S6 kinase A2 [Source:HGNC Symbol;Acc:HGNC:10431]                                      |
| RPS6KA6  | ribosomal protein S6 kinase A6 [Source:HGNC Symbol;Acc:HGNC:10435]                                      |
| ELK4     | ELK4, ETS transcription factor [Source:HGNC Symbol;Acc:HGNC:3326]                                       |
| SRF      | serum response factor [Source:HGNC Symbol;Acc:HGNC:11291]                                               |
| IL1R1    | interleukin 1 receptor type 1 [Source:HGNC Symbol;Acc:HGNC:5993]                                        |
| IL1RAP   | interleukin 1 receptor accessory protein [Source:HGNC Symbol;Acc:HGNC:5995]                             |
| TRADD    | TNFRSF1A associated via death domain [Source:HGNC Symbol;Acc:HGNC:12030]                                |
| DAXX     | death-domain associated protein [Source:HGNC Symbol;Acc:HGNC:2681]                                      |
| GADD45A  | growth arrest and DNA damage inducible alpha [Source:HGNC Symbol;Acc:HGNC:4095]                         |
| GADD45B  | growth arrest and DNA damage inducible beta [Source:HGNC Symbol;Acc:HGNC:4096]                          |
| GADD45G  | growth arrest and DNA damage inducible gamma [Source:HGNC Symbol;Acc:HGNC:4097]                         |
| ECSIT    | ECSIT signalling integrator [Source:HGNC Symbol;Acc:HGNC:29548]                                         |
| MAP4K4   | mitogen-activated protein kinase kinase kinase 4 [Source:HGNC Symbol;Acc:HGNC:6866]                     |
| MAP3K8   | mitogen-activated protein kinase kinase kinase 8 [Source:HGNC Symbol;Acc:HGNC:6860]                     |
| MAP3K11  | mitogen-activated protein kinase kinase kinase 11 [Source:HGNC Symbol;Acc:HGNC:6850]                    |
| MAP3K3   | mitogen-activated protein kinase kinase kinase 3 [Source:HGNC Symbol;Acc:HGNC:6855]                     |
| MAP3K13  | mitogen-activated protein kinase kinase kinase 13 [Source:HGNC Symbol;Acc:HGNC:6852]                    |
| MAP3K12  | mitogen-activated protein kinase kinase kinase 12 [Source:HGNC Symbol;Acc:HGNC:6851]                    |
| MAP3K6   | mitogen-activated protein kinase kinase kinase 6 [Source:HGNC Symbol;Acc:HGNC:6858]                     |
| MAP3K4   | mitogen-activated protein kinase kinase kinase 4 [Source:HGNC Symbol;Acc:HGNC:6856]                     |
| MAPK8IP1 | mitogen-activated protein kinase 8 interacting protein 1 [Source:HGNC Symbol;Acc:HGNC:6882]             |
| MAPK8IP2 | mitogen-activated protein kinase 8 interacting protein 2 [Source:HGNC Symbol;Acc:HGNC:6883]             |
| MAPK8IP3 | mitogen-activated protein kinase 8 interacting protein 3 [Source:HGNC Symbol;Acc:HGNC:6884]             |
| ARRB1    | arrestin beta 1 [Source:HGNC Symbol;Acc:HGNC:711]                                                       |
| ARRB2    | arrestin beta 2 [Source:HGNC Symbol;Acc:HGNC:712]                                                       |
| MAPKAPK5 | mitogen-activated protein kinase-activated protein kinase 5 [Source:HGNC Symbol;Acc:HGNC:6889]          |
| RPS6KA5  | ribosomal protein S6 kinase A5 [Source:HGNC Symbol;Acc:HGNC:10434]                                      |
| RPS6KA4  | ribosomal protein S6 kinase A4 [Source:HGNC Symbol;Acc:HGNC:10433]                                      |
| CDC25B   | cell division cycle 25B [Source:HGNC Symbol;Acc:HGNC:1726]                                              |
| JUND     | JunD proto-oncogene, AP-1 transcription factor subunit [Source:HGNC Symbol;Acc:HGNC:6206]               |
| MAX      | MYC associated factor X [Source:HGNC Symbol;Acc:HGNC:6913]                                              |
| MEF2C    | myocyte enhancer factor 2C [Source:HGNC Symbol;Acc:HGNC:6996]                                           |
| PPM1A    | protein phosphatase, Mg <sup>2+</sup> /Mn <sup>2+</sup> dependent 1A [Source:HGNC Symbol;Acc:HGNC:9275] |
| PTPRR    | protein tyrosine phosphatase, receptor type R [Source:HGNC Symbol;Acc:HGNC:9680]                        |



|         |                                                                                                                  |
|---------|------------------------------------------------------------------------------------------------------------------|
| PTPN5   | protein tyrosine phosphatase, non-receptor type 5 [Source:HGNC Symbol;Acc:HGNC:9657]                             |
| PTPN7   | protein tyrosine phosphatase, non-receptor type 7 [Source:HGNC Symbol;Acc:HGNC:9659]                             |
| DUSP1   | dual specificity phosphatase 1 [Source:HGNC Symbol;Acc:HGNC:3064]                                                |
| DUSP4   | dual specificity phosphatase 4 [Source:HGNC Symbol;Acc:HGNC:3070]                                                |
| DUSP2   | dual specificity phosphatase 2 [Source:HGNC Symbol;Acc:HGNC:3068]                                                |
| DUSP7   | dual specificity phosphatase 7 [Source:HGNC Symbol;Acc:HGNC:3073]                                                |
| DUSP8   | dual specificity phosphatase 8 [Source:HGNC Symbol;Acc:HGNC:3074]                                                |
| DUSP5   | dual specificity phosphatase 5 [Source:HGNC Symbol;Acc:HGNC:3071]                                                |
| DUSP16  | dual specificity phosphatase 16 [Source:HGNC Symbol;Acc:HGNC:17909]                                              |
| DUSP6   | dual specificity phosphatase 6 [Source:HGNC Symbol;Acc:HGNC:3072]                                                |
| DUSP9   | dual specificity phosphatase 9 [Source:HGNC Symbol;Acc:HGNC:3076]                                                |
| DUSP10  | dual specificity phosphatase 10 [Source:HGNC Symbol;Acc:HGNC:3065]                                               |
| DUSP3   | dual specificity phosphatase 3 [Source:HGNC Symbol;Acc:HGNC:3069]                                                |
| PPP5C   | protein phosphatase 5 catalytic subunit [Source:HGNC Symbol;Acc:HGNC:9322]                                       |
| PPM1B   | protein phosphatase, Mg <sup>2+</sup> /Mn <sup>2+</sup> dependent 1B [Source:HGNC Symbol;Acc:HGNC:9276]          |
| HSPA2   | heat shock protein family A (Hsp70) member 2 [Source:HGNC Symbol;Acc:HGNC:5235]                                  |
| HSPA6   | heat shock protein family A (Hsp70) member 6 [Source:HGNC Symbol;Acc:HGNC:5239]                                  |
| MECOM   | MDS1 and EVI1 complex locus [Source:HGNC Symbol;Acc:HGNC:3498]                                                   |
| MAP3K14 | mitogen-activated protein kinase kinase kinase 14 [Source:HGNC Symbol;Acc:HGNC:6853]                             |
| RELB    | RELB proto-oncogene, NF- $\kappa$ B subunit [Source:HGNC Symbol;Acc:HGNC:9956]                                   |
| DOCK4   | dedicator of cytokinesis 4 [Source:HGNC Symbol;Acc:HGNC:19192]                                                   |
| F2RL3   | F2R like thrombin/trypsin receptor 3 [Source:HGNC Symbol;Acc:HGNC:3540]                                          |
| FPR1    | formyl peptide receptor 1 [Source:HGNC Symbol;Acc:HGNC:3826]                                                     |
| ADORA2A | adenosine A <sub>2a</sub> receptor [Source:HGNC Symbol;Acc:HGNC:263]                                             |
| ADORA2B | adenosine A <sub>2b</sub> receptor [Source:HGNC Symbol;Acc:HGNC:264]                                             |
| RAPGEF3 | Rap guanine nucleotide exchange factor 3 [Source:HGNC Symbol;Acc:HGNC:16629]                                     |
| RAPGEF4 | Rap guanine nucleotide exchange factor 4 [Source:HGNC Symbol;Acc:HGNC:16626]                                     |
| MAGI3   | membrane associated guanylate kinase, WW and PDZ domain containing 3 [Source:HGNC Symbol;Acc:HGNC:29647]         |
| LCP2    | lymphocyte cytosolic protein 2 [Source:HGNC Symbol;Acc:HGNC:6529]                                                |
| SKAP1   | src kinase associated phosphoprotein 1 [Source:HGNC Symbol;Acc:HGNC:15605]                                       |
| PRKD3   | protein kinase D3 [Source:HGNC Symbol;Acc:HGNC:9408]                                                             |
| PRKD2   | protein kinase D2 [Source:HGNC Symbol;Acc:HGNC:17293]                                                            |
| CNR1    | cannabinoid receptor 1 (brain) [Source:HGNC Symbol;Acc:HGNC:2159]                                                |
| RAP1GAP | RAP1 GTPase activating protein [Source:HGNC Symbol;Acc:HGNC:9858]                                                |
| SIPA1L1 | signal induced proliferation associated 1 like 1 [Source:HGNC Symbol;Acc:HGNC:20284]                             |
| SIPA1   | signal-induced proliferation-associated 1 [Source:HGNC Symbol;Acc:HGNC:10885]                                    |
| SIPA1L2 | signal induced proliferation associated 1 like 2 [Source:HGNC Symbol;Acc:HGNC:23800]                             |
| SIPA1L3 | signal induced proliferation associated 1 like 3 [Source:HGNC Symbol;Acc:HGNC:23801]                             |
| APBB1IP | amyloid beta precursor protein binding family B member 1 interacting protein [Source:HGNC Symbol;Acc:HGNC:17379] |
| EVL     | Enah/Vasp-like [Source:HGNC Symbol;Acc:HGNC:20234]                                                               |

|          |                                                                                                 |
|----------|-------------------------------------------------------------------------------------------------|
| ARAP3    | ArfGAP with RhoGAP domain, ankyrin repeat and PH domain 3 [Source:HGNC Symbol;Acc:HGNC:24097]   |
| KRIT1    | KRIT1, ankyrin repeat containing [Source:HGNC Symbol;Acc:HGNC:1573]                             |
| RGS14    | regulator of G-protein signaling 14 [Source:HGNC Symbol;Acc:HGNC:9996]                          |
| FYB      | FYN binding protein [Source:HGNC Symbol;Acc:HGNC:4036]                                          |
| PORCN    | porcupine homolog (Drosophila) [Source:HGNC Symbol;Acc:HGNC:17652]                              |
| WNT2     | Wnt family member 2 [Source:HGNC Symbol;Acc:HGNC:12780]                                         |
| WNT2B    | Wnt family member 2B [Source:HGNC Symbol;Acc:HGNC:12781]                                        |
| WNT3     | Wnt family member 3 [Source:HGNC Symbol;Acc:HGNC:12782]                                         |
| WNT3A    | Wnt family member 3A [Source:HGNC Symbol;Acc:HGNC:15983]                                        |
| WNT4     | Wnt family member 4 [Source:HGNC Symbol;Acc:HGNC:12783]                                         |
| WNT5A    | Wnt family member 5A [Source:HGNC Symbol;Acc:HGNC:12784]                                        |
| WNT5B    | Wnt family member 5B [Source:HGNC Symbol;Acc:HGNC:16265]                                        |
| WNT6     | Wnt family member 6 [Source:HGNC Symbol;Acc:HGNC:12785]                                         |
| WNT7A    | Wnt family member 7A [Source:HGNC Symbol;Acc:HGNC:12786]                                        |
| WNT7B    | Wnt family member 7B [Source:HGNC Symbol;Acc:HGNC:12787]                                        |
| WNT8A    | Wnt family member 8A [Source:HGNC Symbol;Acc:HGNC:12788]                                        |
| WNT8B    | Wnt family member 8B [Source:HGNC Symbol;Acc:HGNC:12789]                                        |
| WNT9A    | Wnt family member 9A [Source:HGNC Symbol;Acc:HGNC:12778]                                        |
| WNT9B    | Wnt family member 9B [Source:HGNC Symbol;Acc:HGNC:12779]                                        |
| WNT10B   | Wnt family member 10B [Source:HGNC Symbol;Acc:HGNC:12775]                                       |
| WNT10A   | Wnt family member 10A [Source:HGNC Symbol;Acc:HGNC:13829]                                       |
| WNT11    | Wnt family member 11 [Source:HGNC Symbol;Acc:HGNC:12776]                                        |
| WNT16    | Wnt family member 16 [Source:HGNC Symbol;Acc:HGNC:16267]                                        |
| CER1     | cerberus 1, DAN family BMP antagonist [Source:HGNC Symbol;Acc:HGNC:1862]                        |
| NOTUM    | NOTUM, palmitoleoyl-protein carboxylesterase [Source:HGNC Symbol;Acc:HGNC:27106]                |
| WIF1     | WNT inhibitory factor 1 [Source:HGNC Symbol;Acc:HGNC:18081]                                     |
| SERPINF1 | serpin family F member 1 [Source:HGNC Symbol;Acc:HGNC:8824]                                     |
| SOST     | sclerostin [Source:HGNC Symbol;Acc:HGNC:13771]                                                  |
| DKK1     | dickkopf WNT signaling pathway inhibitor 1 [Source:HGNC Symbol;Acc:HGNC:2891]                   |
| DKK2     | dickkopf WNT signaling pathway inhibitor 2 [Source:HGNC Symbol;Acc:HGNC:2892]                   |
| DKK4     | dickkopf WNT signaling pathway inhibitor 4 [Source:HGNC Symbol;Acc:HGNC:2894]                   |
| SFRP1    | secreted frizzled related protein 1 [Source:HGNC Symbol;Acc:HGNC:10776]                         |
| SFRP2    | secreted frizzled related protein 2 [Source:HGNC Symbol;Acc:HGNC:10777]                         |
| SFRP4    | secreted frizzled related protein 4 [Source:HGNC Symbol;Acc:HGNC:10778]                         |
| SFRP5    | secreted frizzled related protein 5 [Source:HGNC Symbol;Acc:HGNC:10779]                         |
| RSPO1    | R-spondin 1 [Source:HGNC Symbol;Acc:HGNC:21679]                                                 |
| RSPO2    | R-spondin 2 [Source:HGNC Symbol;Acc:HGNC:28583]                                                 |
| RSPO3    | R-spondin 3 [Source:HGNC Symbol;Acc:HGNC:20866]                                                 |
| RSPO4    | R-spondin 4 [Source:HGNC Symbol;Acc:HGNC:16175]                                                 |
| LGR4     | leucine rich repeat containing G protein-coupled receptor 4 [Source:HGNC Symbol;Acc:HGNC:13299] |

|          |                                                                                                 |
|----------|-------------------------------------------------------------------------------------------------|
| LGR5     | leucine rich repeat containing G protein-coupled receptor 5 [Source:HGNC Symbol;Acc:HGNC:4504]  |
| LGR6     | leucine rich repeat containing G protein-coupled receptor 6 [Source:HGNC Symbol;Acc:HGNC:19719] |
| RNF43    | ring finger protein 43 [Source:HGNC Symbol;Acc:HGNC:18505]                                      |
| ZNRF3    | zinc and ring finger 3 [Source:HGNC Symbol;Acc:HGNC:18126]                                      |
| FZD1     | frizzled class receptor 1 [Source:HGNC Symbol;Acc:HGNC:4038]                                    |
| FZD7     | frizzled class receptor 7 [Source:HGNC Symbol;Acc:HGNC:4045]                                    |
| FZD2     | frizzled class receptor 2 [Source:HGNC Symbol;Acc:HGNC:4040]                                    |
| FZD3     | frizzled class receptor 3 [Source:HGNC Symbol;Acc:HGNC:4041]                                    |
| FZD4     | frizzled class receptor 4 [Source:HGNC Symbol;Acc:HGNC:4042]                                    |
| FZD5     | frizzled class receptor 5 [Source:HGNC Symbol;Acc:HGNC:4043]                                    |
| FZD8     | frizzled class receptor 8 [Source:HGNC Symbol;Acc:HGNC:4046]                                    |
| FZD6     | frizzled class receptor 6 [Source:HGNC Symbol;Acc:HGNC:4044]                                    |
| FZD10    | frizzled class receptor 10 [Source:HGNC Symbol;Acc:HGNC:4039]                                   |
| FZD9     | frizzled class receptor 9 [Source:HGNC Symbol;Acc:HGNC:4047]                                    |
| LRP5     | LDL receptor related protein 5 [Source:HGNC Symbol;Acc:HGNC:6697]                               |
| LRP6     | LDL receptor related protein 6 [Source:HGNC Symbol;Acc:HGNC:6698]                               |
| CSNK1E   | casein kinase 1 epsilon [Source:HGNC Symbol;Acc:HGNC:2453]                                      |
| DVL3     | dishevelled segment polarity protein 3 [Source:HGNC Symbol;Acc:HGNC:3087]                       |
| DVL2     | dishevelled segment polarity protein 2 [Source:HGNC Symbol;Acc:HGNC:3086]                       |
| DVL1     | dishevelled segment polarity protein 1 [Source:HGNC Symbol;Acc:HGNC:3084]                       |
| FRAT1    | frequently rearranged in advanced T-cell lymphomas 1 [Source:HGNC Symbol;Acc:HGNC:3944]         |
| FRAT2    | frequently rearranged in advanced T-cell lymphomas 2 [Source:HGNC Symbol;Acc:HGNC:16048]        |
| NKD1     | naked cuticle homolog 1 [Source:HGNC Symbol;Acc:HGNC:17045]                                     |
| NKD2     | naked cuticle homolog 2 [Source:HGNC Symbol;Acc:HGNC:17046]                                     |
| CXXC4    | CXXC finger protein 4 [Source:HGNC Symbol;Acc:HGNC:24593]                                       |
| SEN2     | SUMO1/sentrin/SMT3 specific peptidase 2 [Source:HGNC Symbol;Acc:HGNC:23116]                     |
| AXIN1    | axin 1 [Source:HGNC Symbol;Acc:HGNC:903]                                                        |
| AXIN2    | axin 2 [Source:HGNC Symbol;Acc:HGNC:904]                                                        |
| CSNK1A1L | casein kinase 1 alpha 1 like [Source:HGNC Symbol;Acc:HGNC:20289]                                |
| CSNK1A1  | casein kinase 1 alpha 1 [Source:HGNC Symbol;Acc:HGNC:2451]                                      |
| CTNNBIP1 | catenin beta interacting protein 1 [Source:HGNC Symbol;Acc:HGNC:16913]                          |
| CBY1     | chibby family member 1, beta catenin antagonist [Source:HGNC Symbol;Acc:HGNC:1307]              |
| CHD8     | chromodomain helicase DNA binding protein 8 [Source:HGNC Symbol;Acc:HGNC:20153]                 |
| SOX17    | SRY-box 17 [Source:HGNC Symbol;Acc:HGNC:18122]                                                  |
| CTBP1    | C-terminal binding protein 1 [Source:HGNC Symbol;Acc:HGNC:2494]                                 |
| CTBP2    | C-terminal binding protein 2 [Source:HGNC Symbol;Acc:HGNC:2495]                                 |
| TLE1     | transducin like enhancer of split 1 [Source:HGNC Symbol;Acc:HGNC:11837]                         |
| TLE2     | transducin like enhancer of split 2 [Source:HGNC Symbol;Acc:HGNC:11838]                         |
| TLE3     | transducin like enhancer of split 3 [Source:HGNC Symbol;Acc:HGNC:11839]                         |
| TLE4     | transducin like enhancer of split 4 [Source:HGNC Symbol;Acc:HGNC:11840]                         |

|          |                                                                                                                 |
|----------|-----------------------------------------------------------------------------------------------------------------|
| TLE6     | transducin like enhancer of split 6 [Source:HGNC Symbol;Acc:HGNC:30788]                                         |
| CTNND2   | catenin delta 2 [Source:HGNC Symbol;Acc:HGNC:2516]                                                              |
| RUVBL1   | RuvB like AAA ATPase 1 [Source:HGNC Symbol;Acc:HGNC:10474]                                                      |
| FOSL1    | FOS like 1, AP-1 transcription factor subunit [Source:HGNC Symbol;Acc:HGNC:13718]                               |
| WISP1    | WNT1 inducible signaling pathway protein 1 [Source:HGNC Symbol;Acc:HGNC:12769]                                  |
| PPARD    | peroxisome proliferator activated receptor delta [Source:HGNC Symbol;Acc:HGNC:9235]                             |
| PSEN1    | presenilin 1 [Source:HGNC Symbol;Acc:HGNC:9508]                                                                 |
| SIAH1    | siah E3 ubiquitin protein ligase 1 [Source:HGNC Symbol;Acc:HGNC:10857]                                          |
| CACYBP   | calcyclin binding protein [Source:HGNC Symbol;Acc:HGNC:30423]                                                   |
| TBL1X    | transducin (beta)-like 1X-linked [Source:HGNC Symbol;Acc:HGNC:11585]                                            |
| TBL1Y    | transducin (beta)-like 1, Y-linked [Source:HGNC Symbol;Acc:HGNC:18502]                                          |
| TBL1XR1  | transducin (beta)-like 1 X-linked receptor 1 [Source:HGNC Symbol;Acc:HGNC:29529]                                |
| BTRC     | beta-transducin repeat containing E3 ubiquitin protein ligase [Source:HGNC Symbol;Acc:HGNC:1144]                |
| FBXW11   | F-box and WD repeat domain containing 11 [Source:HGNC Symbol;Acc:HGNC:13607]                                    |
| GPC4     | glypican 4 [Source:HGNC Symbol;Acc:HGNC:4452]                                                                   |
| ROR1     | receptor tyrosine kinase-like orphan receptor 1 [Source:HGNC Symbol;Acc:HGNC:10256]                             |
| ROR2     | receptor tyrosine kinase like orphan receptor 2 [Source:HGNC Symbol;Acc:HGNC:10257]                             |
| RYK      | receptor-like tyrosine kinase [Source:HGNC Symbol;Acc:HGNC:10481]                                               |
| VANGL2   | VANGL planar cell polarity protein 2 [Source:HGNC Symbol;Acc:HGNC:15511]                                        |
| VANGL1   | VANGL planar cell polarity protein 1 [Source:HGNC Symbol;Acc:HGNC:15512]                                        |
| PRICKLE1 | prickle planar cell polarity protein 1 [Source:HGNC Symbol;Acc:HGNC:17019]                                      |
| PRICKLE2 | prickle planar cell polarity protein 2 [Source:HGNC Symbol;Acc:HGNC:20340]                                      |
| PRICKLE4 | prickle planar cell polarity protein 4 [Source:HGNC Symbol;Acc:HGNC:16805]                                      |
| PRICKLE3 | prickle planar cell polarity protein 3 [Source:HGNC Symbol;Acc:HGNC:6645]                                       |
| INVS     | inversin [Source:HGNC Symbol;Acc:HGNC:17870]                                                                    |
| DAAM1    | dishevelled associated activator of morphogenesis 1 [Source:HGNC Symbol;Acc:HGNC:18142]                         |
| DAAM2    | dishevelled associated activator of morphogenesis 2 [Source:HGNC Symbol;Acc:HGNC:18143]                         |
| NFATC4   | nuclear factor of activated T-cells 4 [Source:HGNC Symbol;Acc:HGNC:7778]                                        |
| DLL3     | delta like canonical Notch ligand 3 [Source:HGNC Symbol;Acc:HGNC:2909]                                          |
| DLL1     | delta like canonical Notch ligand 1 [Source:HGNC Symbol;Acc:HGNC:2908]                                          |
| JAG1     | jagged 1 [Source:HGNC Symbol;Acc:HGNC:6188]                                                                     |
| JAG2     | jagged 2 [Source:HGNC Symbol;Acc:HGNC:6189]                                                                     |
| MFNG     | MFNG O-fucosylpeptide 3-beta-N-acetylglucosaminyltransferase [Source:HGNC Symbol;Acc:HGNC:7038]                 |
| LFNG     | LFNG O-fucosylpeptide 3-beta-N-acetylglucosaminyltransferase [Source:HGNC Symbol;Acc:HGNC:6560]                 |
| RFNG     | RFNG O-fucosylpeptide 3-beta-N-acetylglucosaminyltransferase [Source:HGNC Symbol;Acc:HGNC:9974]                 |
| RBPJL    | recombination signal binding protein for immunoglobulin kappa J region like [Source:HGNC Symbol;Acc:HGNC:13761] |
| HES1     | hes family bHLH transcription factor 1 [Source:HGNC Symbol;Acc:HGNC:5192]                                       |
| HES5     | hes family bHLH transcription factor 5 [Source:HGNC Symbol;Acc:HGNC:19764]                                      |

|         |                                                                                                      |
|---------|------------------------------------------------------------------------------------------------------|
| HEYL    | hes related family bHLH transcription factor with YRPW motif-like [Source:HGNC Symbol;Acc:HGNC:4882] |
| HEY1    | hes related family bHLH transcription factor with YRPW motif 1 [Source:HGNC Symbol;Acc:HGNC:4880]    |
| HEY2    | hes related family bHLH transcription factor with YRPW motif 2 [Source:HGNC Symbol;Acc:HGNC:4881]    |
| PTCRA   | pre T-cell antigen receptor alpha [Source:HGNC Symbol;Acc:HGNC:21290]                                |
| NUMB    | NUMB, endocytic adaptor protein [Source:HGNC Symbol;Acc:HGNC:8060]                                   |
| NUMBL   | NUMB like, endocytic adaptor protein [Source:HGNC Symbol;Acc:HGNC:8061]                              |
| DTX2    | deltex 2, E3 ubiquitin ligase [Source:HGNC Symbol;Acc:HGNC:15973]                                    |
| DTX3L   | deltex 3 like, E3 ubiquitin ligase [Source:HGNC Symbol;Acc:HGNC:30323]                               |
| DTX1    | deltex 1 [Source:HGNC Symbol;Acc:HGNC:3060]                                                          |
| DTX3    | deltex 3, E3 ubiquitin ligase [Source:HGNC Symbol;Acc:HGNC:24457]                                    |
| DTX4    | deltex 4, E3 ubiquitin ligase [Source:HGNC Symbol;Acc:HGNC:29151]                                    |
| ADAM17  | ADAM metallopeptidase domain 17 [Source:HGNC Symbol;Acc:HGNC:195]                                    |
| PSEN2   | presenilin 2 [Source:HGNC Symbol;Acc:HGNC:9509]                                                      |
| PSENEN  | presenilin enhancer gamma-secretase subunit [Source:HGNC Symbol;Acc:HGNC:30100]                      |
| NCSTN   | nicastatin [Source:HGNC Symbol;Acc:HGNC:17091]                                                       |
| APH1A   | aph-1 homolog A, gamma-secretase subunit [Source:HGNC Symbol;Acc:HGNC:29509]                         |
| APH1B   | aph-1 homolog B, gamma-secretase subunit [Source:HGNC Symbol;Acc:HGNC:24080]                         |
| MAML3   | mastermind like transcriptional coactivator 3 [Source:HGNC Symbol;Acc:HGNC:16272]                    |
| MAML2   | mastermind like transcriptional coactivator 2 [Source:HGNC Symbol;Acc:HGNC:16259]                    |
| MAML1   | mastermind like transcriptional coactivator 1 [Source:HGNC Symbol;Acc:HGNC:13632]                    |
| KAT2B   | lysine acetyltransferase 2B [Source:HGNC Symbol;Acc:HGNC:8638]                                       |
| KAT2A   | lysine acetyltransferase 2A [Source:HGNC Symbol;Acc:HGNC:4201]                                       |
| SNW1    | SNW domain containing 1 [Source:HGNC Symbol;Acc:HGNC:16696]                                          |
| NCOR2   | nuclear receptor corepressor 2 [Source:HGNC Symbol;Acc:HGNC:7673]                                    |
| CIR1    | corepressor interacting with RBPJ, 1 [Source:HGNC Symbol;Acc:HGNC:24217]                             |
| HDAC1   | histone deacetylase 1 [Source:HGNC Symbol;Acc:HGNC:4852]                                             |
| ATXN1L  | ataxin 1 like [Source:HGNC Symbol;Acc:HGNC:33279]                                                    |
| ATXN1   | ataxin 1 [Source:HGNC Symbol;Acc:HGNC:10548]                                                         |
| PTCH1   | patched 1 [Source:HGNC Symbol;Acc:HGNC:9585]                                                         |
| PTCH2   | patched 2 [Source:HGNC Symbol;Acc:HGNC:9586]                                                         |
| SMO     | smoothened, frizzled class receptor [Source:HGNC Symbol;Acc:HGNC:11119]                              |
| GPR161  | G protein-coupled receptor 161 [Source:HGNC Symbol;Acc:HGNC:23694]                                   |
| CSNK1G2 | casein kinase 1 gamma 2 [Source:HGNC Symbol;Acc:HGNC:2455]                                           |
| CSNK1G3 | casein kinase 1 gamma 3 [Source:HGNC Symbol;Acc:HGNC:2456]                                           |
| CSNK1G1 | casein kinase 1 gamma 1 [Source:HGNC Symbol;Acc:HGNC:2454]                                           |
| GLI1    | GLI family zinc finger 1 [Source:HGNC Symbol;Acc:HGNC:4317]                                          |
| GLI2    | GLI family zinc finger 2 [Source:HGNC Symbol;Acc:HGNC:4318]                                          |
| GLI3    | GLI family zinc finger 3 [Source:HGNC Symbol;Acc:HGNC:4319]                                          |
| SUFU    | SUFU negative regulator of hedgehog signaling [Source:HGNC Symbol;Acc:HGNC:16466]                    |

|          |                                                                                                 |
|----------|-------------------------------------------------------------------------------------------------|
| KIF7     | kinesin family member 7 [Source:HGNC Symbol;Acc:HGNC:30497]                                     |
| HHIP     | hedgehog interacting protein [Source:HGNC Symbol;Acc:HGNC:14866]                                |
| HHAT     | hedgehog acyltransferase [Source:HGNC Symbol;Acc:HGNC:18270]                                    |
| HHATL    | hedgehog acyltransferase-like [Source:HGNC Symbol;Acc:HGNC:13242]                               |
| SHH      | sonic hedgehog [Source:HGNC Symbol;Acc:HGNC:10848]                                              |
| IHH      | indian hedgehog [Source:HGNC Symbol;Acc:HGNC:5956]                                              |
| DHH      | desert hedgehog [Source:HGNC Symbol;Acc:HGNC:2865]                                              |
| DISP1    | dispatched RND transporter family member 1 [Source:HGNC Symbol;Acc:HGNC:19711]                  |
| SCUBE2   | signal peptide, CUB domain and EGF like domain containing 2 [Source:HGNC Symbol;Acc:HGNC:30425] |
| BOC      | BOC cell adhesion associated, oncogene regulated [Source:HGNC Symbol;Acc:HGNC:17173]            |
| CDON     | cell adhesion associated, oncogene regulated [Source:HGNC Symbol;Acc:HGNC:17104]                |
| GAS1     | growth arrest specific 1 [Source:HGNC Symbol;Acc:HGNC:4165]                                     |
| MEGF8    | multiple EGF like domains 8 [Source:HGNC Symbol;Acc:HGNC:3233]                                  |
| MGRN1    | mahogunin ring finger 1 [Source:HGNC Symbol;Acc:HGNC:20254]                                     |
| GRK2     | G protein-coupled receptor kinase 2 [Source:HGNC Symbol;Acc:HGNC:289]                           |
| GRK3     | G protein-coupled receptor kinase 3 [Source:HGNC Symbol;Acc:HGNC:290]                           |
| EVC      | EvC ciliary complex subunit 1 [Source:HGNC Symbol;Acc:HGNC:3497]                                |
| EVC2     | EvC ciliary complex subunit 2 [Source:HGNC Symbol;Acc:HGNC:19747]                               |
| EFCAB7   | EF-hand calcium binding domain 7 [Source:HGNC Symbol;Acc:HGNC:29379]                            |
| IQCE     | IQ motif containing E [Source:HGNC Symbol;Acc:HGNC:29171]                                       |
| KIF3A    | kinesin family member 3A [Source:HGNC Symbol;Acc:HGNC:6319]                                     |
| CUL3     | cullin 3 [Source:HGNC Symbol;Acc:HGNC:2553]                                                     |
| SPOP     | speckle type BTB/POZ protein [Source:HGNC Symbol;Acc:HGNC:11254]                                |
| SPOPL    | speckle type BTB/POZ protein like [Source:HGNC Symbol;Acc:HGNC:27934]                           |
| C16orf52 | chromosome 16 open reading frame 52 [Source:HGNC Symbol;Acc:HGNC:27087]                         |
| CRB2     | crumbs 2, cell polarity complex component [Source:HGNC Symbol;Acc:HGNC:18688]                   |
| LIMD1    | LIM domains containing 1 [Source:HGNC Symbol;Acc:HGNC:6612]                                     |
| AJUBA    | ajuba LIM protein [Source:HGNC Symbol;Acc:HGNC:20250]                                           |
| WTIP     | Wilms tumor 1 interacting protein [Source:HGNC Symbol;Acc:HGNC:20964]                           |
| FRMD1    | FERM domain containing 1 [Source:HGNC Symbol;Acc:HGNC:21240]                                    |
| RASSF6   | Ras association domain family member 6 [Source:HGNC Symbol;Acc:HGNC:20796]                      |
| TP53BP2  | tumor protein p53 binding protein 2 [Source:HGNC Symbol;Acc:HGNC:12000]                         |
| DLG4     | discs large MAGUK scaffold protein 4 [Source:HGNC Symbol;Acc:HGNC:2903]                         |
| DLG5     | discs large MAGUK scaffold protein 5 [Source:HGNC Symbol;Acc:HGNC:2904]                         |
| BBC3     | BCL2 binding component 3 [Source:HGNC Symbol;Acc:HGNC:17868]                                    |
| BIRC5    | baculoviral IAP repeat containing 5 [Source:HGNC Symbol;Acc:HGNC:593]                           |
| AFP      | alpha fetoprotein [Source:HGNC Symbol;Acc:HGNC:317]                                             |
| IL5      | interleukin 5 [Source:HGNC Symbol;Acc:HGNC:6016]                                                |
| IL9      | interleukin 9 [Source:HGNC Symbol;Acc:HGNC:6029]                                                |
| IL10     | interleukin 10 [Source:HGNC Symbol;Acc:HGNC:5962]                                               |
| IL11     | interleukin 11 [Source:HGNC Symbol;Acc:HGNC:5966]                                               |

|         |                                                                              |
|---------|------------------------------------------------------------------------------|
| IL13    | interleukin 13 [Source:HGNC Symbol;Acc:HGNC:5973]                            |
| IL15    | interleukin 15 [Source:HGNC Symbol;Acc:HGNC:5977]                            |
| IL17D   | interleukin 17D [Source:HGNC Symbol;Acc:HGNC:5984]                           |
| IL19    | interleukin 19 [Source:HGNC Symbol;Acc:HGNC:5990]                            |
| IL20    | interleukin 20 [Source:HGNC Symbol;Acc:HGNC:6002]                            |
| IL21    | interleukin 21 [Source:HGNC Symbol;Acc:HGNC:6005]                            |
| IL22    | interleukin 22 [Source:HGNC Symbol;Acc:HGNC:14900]                           |
| IL23A   | interleukin 23 subunit alpha [Source:HGNC Symbol;Acc:HGNC:15488]             |
| IL24    | interleukin 24 [Source:HGNC Symbol;Acc:HGNC:11346]                           |
| IFNE    | interferon, epsilon [Source:HGNC Symbol;Acc:HGNC:18163]                      |
| IFNK    | interferon kappa [Source:HGNC Symbol;Acc:HGNC:21714]                         |
| IFNL1   | interferon, lambda 1 [Source:HGNC Symbol;Acc:HGNC:18363]                     |
| IFNL2   | interferon, lambda 2 [Source:HGNC Symbol;Acc:HGNC:18364]                     |
| IFNL3   | interferon, lambda 3 [Source:HGNC Symbol;Acc:HGNC:18365]                     |
| IFNW1   | interferon, omega 1 [Source:HGNC Symbol;Acc:HGNC:5448]                       |
| LIF     | leukemia inhibitory factor [Source:HGNC Symbol;Acc:HGNC:6596]                |
| TSLP    | thymic stromal lymphopoietin [Source:HGNC Symbol;Acc:HGNC:30743]             |
| CTF1    | cardiotrophin 1 [Source:HGNC Symbol;Acc:HGNC:2499]                           |
| CSF2    | colony stimulating factor 2 [Source:HGNC Symbol;Acc:HGNC:2434]               |
| CNTF    | ciliary neurotrophic factor [Source:HGNC Symbol;Acc:HGNC:2169]               |
| THPO    | thrombopoietin [Source:HGNC Symbol;Acc:HGNC:11795]                           |
| IL5RA   | interleukin 5 receptor subunit alpha [Source:HGNC Symbol;Acc:HGNC:6017]      |
| IL9R    | interleukin 9 receptor [Source:HGNC Symbol;Acc:HGNC:6030]                    |
| IL10RA  | interleukin 10 receptor subunit alpha [Source:HGNC Symbol;Acc:HGNC:5964]     |
| IL10RB  | interleukin 10 receptor subunit beta [Source:HGNC Symbol;Acc:HGNC:5965]      |
| IL11RA  | interleukin 11 receptor subunit alpha [Source:HGNC Symbol;Acc:HGNC:5967]     |
| IL12RB1 | interleukin 12 receptor subunit beta 1 [Source:HGNC Symbol;Acc:HGNC:5971]    |
| IL12RB2 | interleukin 12 receptor subunit beta 2 [Source:HGNC Symbol;Acc:HGNC:5972]    |
| IL13RA1 | interleukin 13 receptor subunit alpha 1 [Source:HGNC Symbol;Acc:HGNC:5974]   |
| IL13RA2 | interleukin 13 receptor subunit alpha 2 [Source:HGNC Symbol;Acc:HGNC:5975]   |
| IL15RA  | interleukin 15 receptor subunit alpha [Source:HGNC Symbol;Acc:HGNC:5978]     |
| IL20RA  | interleukin 20 receptor subunit alpha [Source:HGNC Symbol;Acc:HGNC:6003]     |
| IL20RB  | interleukin 20 receptor subunit beta [Source:HGNC Symbol;Acc:HGNC:6004]      |
| IL21R   | interleukin 21 receptor [Source:HGNC Symbol;Acc:HGNC:6006]                   |
| IL22RA1 | interleukin 22 receptor subunit alpha 1 [Source:HGNC Symbol;Acc:HGNC:13700]  |
| IL22RA2 | interleukin 22 receptor subunit alpha 2 [Source:HGNC Symbol;Acc:HGNC:14901]  |
| IL23R   | interleukin 23 receptor [Source:HGNC Symbol;Acc:HGNC:19100]                  |
| IL27RA  | interleukin 27 receptor subunit alpha [Source:HGNC Symbol;Acc:HGNC:17290]    |
| IL6ST   | interleukin 6 signal transducer [Source:HGNC Symbol;Acc:HGNC:6021]           |
| IFNLR1  | interferon lambda receptor 1 [Source:HGNC Symbol;Acc:HGNC:18584]             |
| LIFR    | leukemia inhibitory factor receptor alpha [Source:HGNC Symbol;Acc:HGNC:6597] |

|        |                                                                                             |
|--------|---------------------------------------------------------------------------------------------|
| CRLF2  | cytokine receptor-like factor 2 [Source:HGNC Symbol;Acc:HGNC:14281]                         |
| CNTFR  | ciliary neurotrophic factor receptor [Source:HGNC Symbol;Acc:HGNC:2170]                     |
| CSF2RA | colony stimulating factor 2 receptor alpha subunit [Source:HGNC Symbol;Acc:HGNC:2435]       |
| CSF2RB | colony stimulating factor 2 receptor beta common subunit [Source:HGNC Symbol;Acc:HGNC:2436] |
| MPL    | MPL proto-oncogene, thrombopoietin receptor [Source:HGNC Symbol;Acc:HGNC:7217]              |
| TYK2   | tyrosine kinase 2 [Source:HGNC Symbol;Acc:HGNC:12440]                                       |
| STAT1  | signal transducer and activator of transcription 1 [Source:HGNC Symbol;Acc:HGNC:11362]      |
| STAT2  | signal transducer and activator of transcription 2 [Source:HGNC Symbol;Acc:HGNC:11363]      |
| STAT4  | signal transducer and activator of transcription 4 [Source:HGNC Symbol;Acc:HGNC:11365]      |
| STAT5A | signal transducer and activator of transcription 5A [Source:HGNC Symbol;Acc:HGNC:11366]     |
| STAT5B | signal transducer and activator of transcription 5B [Source:HGNC Symbol;Acc:HGNC:11367]     |
| STAT6  | signal transducer and activator of transcription 6 [Source:HGNC Symbol;Acc:HGNC:11368]      |
| CISH   | cytokine inducible SH2 containing protein [Source:HGNC Symbol;Acc:HGNC:1984]                |
| SOCS1  | suppressor of cytokine signaling 1 [Source:HGNC Symbol;Acc:HGNC:19383]                      |
| SOCS2  | suppressor of cytokine signaling 2 [Source:HGNC Symbol;Acc:HGNC:19382]                      |
| SOCS3  | suppressor of cytokine signaling 3 [Source:HGNC Symbol;Acc:HGNC:19391]                      |
| SOCS4  | suppressor of cytokine signaling 4 [Source:HGNC Symbol;Acc:HGNC:19392]                      |
| SOCS5  | suppressor of cytokine signaling 5 [Source:HGNC Symbol;Acc:HGNC:16852]                      |
| SOCS7  | suppressor of cytokine signaling 7 [Source:HGNC Symbol;Acc:HGNC:29846]                      |
| SOCS6  | suppressor of cytokine signaling 6 [Source:HGNC Symbol;Acc:HGNC:16833]                      |
| PIM1   | Pim-1 proto-oncogene, serine/threonine kinase [Source:HGNC Symbol;Acc:HGNC:8986]            |
| AOX1   | aldehyde oxidase 1 [Source:HGNC Symbol;Acc:HGNC:553]                                        |
| GFAP   | glial fibrillary acidic protein [Source:HGNC Symbol;Acc:HGNC:4235]                          |
| STAM2  | signal transducing adaptor molecule 2 [Source:HGNC Symbol;Acc:HGNC:11358]                   |
| STAM   | signal transducing adaptor molecule [Source:HGNC Symbol;Acc:HGNC:11357]                     |
| PTPN2  | protein tyrosine phosphatase, non-receptor type 2 [Source:HGNC Symbol;Acc:HGNC:9650]        |
| IRF9   | interferon regulatory factor 9 [Source:HGNC Symbol;Acc:HGNC:6131]                           |
| PIAS1  | protein inhibitor of activated STAT 1 [Source:HGNC Symbol;Acc:HGNC:2752]                    |
| PIAS2  | protein inhibitor of activated STAT 2 [Source:HGNC Symbol;Acc:HGNC:17311]                   |
| PIAS3  | protein inhibitor of activated STAT 3 [Source:HGNC Symbol;Acc:HGNC:16861]                   |
| PIAS4  | protein inhibitor of activated STAT 4 [Source:HGNC Symbol;Acc:HGNC:17002]                   |
| FHL1   | four and a half LIM domains 1 [Source:HGNC Symbol;Acc:HGNC:3702]                            |
| ADCY10 | adenylate cyclase 10 (soluble) [Source:HGNC Symbol;Acc:HGNC:21285]                          |
| APELA  | apelin receptor early endogenous ligand [Source:HGNC Symbol;Acc:HGNC:48925]                 |
| APLNR  | apelin receptor [Source:HGNC Symbol;Acc:HGNC:339]                                           |
| RYR1   | ryanodine receptor 1 [Source:HGNC Symbol;Acc:HGNC:10483]                                    |
| RYR2   | ryanodine receptor 2 [Source:HGNC Symbol;Acc:HGNC:10484]                                    |
| RYR3   | ryanodine receptor 3 [Source:HGNC Symbol;Acc:HGNC:10485]                                    |
| NOS1   | nitric oxide synthase 1 [Source:HGNC Symbol;Acc:HGNC:7872]                                  |
| SLC8A1 | solute carrier family 8 member A1 [Source:HGNC Symbol;Acc:HGNC:11068]                       |
| SLC8A2 | solute carrier family 8 member A2 [Source:HGNC Symbol;Acc:HGNC:11069]                       |



|              |                                                                                           |
|--------------|-------------------------------------------------------------------------------------------|
| SLC8A3       | solute carrier family 8 member A3 [Source:HGNC Symbol;Acc:HGNC:11070]                     |
| MYL3         | myosin light chain 3 [Source:HGNC Symbol;Acc:HGNC:7584]                                   |
| MYL4         | myosin light chain 4 [Source:HGNC Symbol;Acc:HGNC:7585]                                   |
| EGR1         | early growth response 1 [Source:HGNC Symbol;Acc:HGNC:3238]                                |
| PDE3B        | phosphodiesterase 3B [Source:HGNC Symbol;Acc:HGNC:8779]                                   |
| PLIN1        | perilipin 1 [Source:HGNC Symbol;Acc:HGNC:9076]                                            |
| UCP1         | uncoupling protein 1 [Source:HGNC Symbol;Acc:HGNC:12517]                                  |
| NRF1         | nuclear respiratory factor 1 [Source:HGNC Symbol;Acc:HGNC:7996]                           |
| TFAM         | transcription factor A, mitochondrial [Source:HGNC Symbol;Acc:HGNC:11741]                 |
| HDAC4        | histone deacetylase 4 [Source:HGNC Symbol;Acc:HGNC:14063]                                 |
| HDAC5        | histone deacetylase 5 [Source:HGNC Symbol;Acc:HGNC:14068]                                 |
| MEF2A        | myocyte enhancer factor 2A [Source:HGNC Symbol;Acc:HGNC:6993]                             |
| BORCS8-MEF2B | BORCS8-MEF2B readthrough [Source:HGNC Symbol;Acc:HGNC:39979]                              |
| MEF2B        | myocyte enhancer factor 2B [Source:HGNC Symbol;Acc:HGNC:6995]                             |
| MEF2D        | myocyte enhancer factor 2D [Source:HGNC Symbol;Acc:HGNC:6997]                             |
| ACTA2        | actin, alpha 2, smooth muscle, aorta [Source:HGNC Symbol;Acc:HGNC:130]                    |
| PLAT         | plasminogen activator, tissue type [Source:HGNC Symbol;Acc:HGNC:9051]                     |
| LCK          | LCK proto-oncogene, Src family tyrosine kinase [Source:HGNC Symbol;Acc:HGNC:6524]         |
| BLNK         | B-cell linker [Source:HGNC Symbol;Acc:HGNC:14211]                                         |
| BTK          | Bruton tyrosine kinase [Source:HGNC Symbol;Acc:HGNC:1133]                                 |
| CARD10       | caspase recruitment domain family member 10 [Source:HGNC Symbol;Acc:HGNC:16422]           |
| CARD11       | caspase recruitment domain family member 11 [Source:HGNC Symbol;Acc:HGNC:16393]           |
| CARD14       | caspase recruitment domain family member 14 [Source:HGNC Symbol;Acc:HGNC:16446]           |
| MALT1        | MALT1 paracaspase [Source:HGNC Symbol;Acc:HGNC:6819]                                      |
| RIPK1        | receptor interacting serine/threonine kinase 1 [Source:HGNC Symbol;Acc:HGNC:10019]        |
| TRAF5        | TNF receptor associated factor 5 [Source:HGNC Symbol;Acc:HGNC:12035]                      |
| EDA          | ectodysplasin A [Source:HGNC Symbol;Acc:HGNC:3157]                                        |
| EDAR         | ectodysplasin A receptor [Source:HGNC Symbol;Acc:HGNC:2895]                               |
| EDARADD      | EDAR-associated death domain [Source:HGNC Symbol;Acc:HGNC:14341]                          |
| CYLD         | CYLD lysine 63 deubiquitinase [Source:HGNC Symbol;Acc:HGNC:2584]                          |
| EDA2R        | ectodysplasin A2 receptor [Source:HGNC Symbol;Acc:HGNC:17756]                             |
| TRIM25       | tripartite motif containing 25 [Source:HGNC Symbol;Acc:HGNC:12932]                        |
| TICAM1       | toll like receptor adaptor molecule 1 [Source:HGNC Symbol;Acc:HGNC:18348]                 |
| TNFSF11      | tumor necrosis factor superfamily member 11 [Source:HGNC Symbol;Acc:HGNC:11926]           |
| TNFRSF11A    | tumor necrosis factor receptor superfamily member 11a [Source:HGNC Symbol;Acc:HGNC:11908] |
| LTA          | lymphotoxin alpha [Source:HGNC Symbol;Acc:HGNC:6709]                                      |
| LTB          | lymphotoxin beta [Source:HGNC Symbol;Acc:HGNC:6711]                                       |
| TNFSF14      | tumor necrosis factor superfamily member 14 [Source:HGNC Symbol;Acc:HGNC:11930]           |
| TAB3         | TGF-beta activated kinase 1/MAP3K7 binding protein 3 [Source:HGNC Symbol;Acc:HGNC:30681]  |
| TNFSF13B     | tumor necrosis factor superfamily member 13b [Source:HGNC Symbol;Acc:HGNC:11929]          |

|           |                                                                                                      |
|-----------|------------------------------------------------------------------------------------------------------|
| TNFRSF13C | tumor necrosis factor receptor superfamily member 13C [Source:HGNC Symbol;Acc:HGNC:17755]            |
| UBE2I     | ubiquitin conjugating enzyme E2 I [Source:HGNC Symbol;Acc:HGNC:12485]                                |
| PIDD1     | p53-induced death domain protein 1 [Source:HGNC Symbol;Acc:HGNC:16491]                               |
| ERC1      | ELKS/RAB6-interacting/CAST family member 1 [Source:HGNC Symbol;Acc:HGNC:17072]                       |
| TRAF1     | TNF receptor associated factor 1 [Source:HGNC Symbol;Acc:HGNC:12031]                                 |
| BCL2A1    | BCL2 related protein A1 [Source:HGNC Symbol;Acc:HGNC:991]                                            |
| TNFAIP3   | TNF alpha induced protein 3 [Source:HGNC Symbol;Acc:HGNC:11896]                                      |
| CCL4      | C-C motif chemokine ligand 4 [Source:HGNC Symbol;Acc:HGNC:10630]                                     |
| CCL4L2    | C-C motif chemokine ligand 4 like 2 [Source:HGNC Symbol;Acc:HGNC:24066]                              |
| PLAU      | plasminogen activator, urokinase [Source:HGNC Symbol;Acc:HGNC:9052]                                  |
| CCL13     | C-C motif chemokine ligand 13 [Source:HGNC Symbol;Acc:HGNC:10611]                                    |
| CCL19     | C-C motif chemokine ligand 19 [Source:HGNC Symbol;Acc:HGNC:10617]                                    |
| CCL21     | C-C motif chemokine ligand 21 [Source:HGNC Symbol;Acc:HGNC:10620]                                    |
| BAG4      | BCL2 associated athanogene 4 [Source:HGNC Symbol;Acc:HGNC:940]                                       |
| ITCH      | itchy E3 ubiquitin protein ligase [Source:HGNC Symbol;Acc:HGNC:13890]                                |
| CEBPB     | CCAAT/enhancer binding protein beta [Source:HGNC Symbol;Acc:HGNC:1834]                               |
| RIPK3     | receptor interacting serine/threonine kinase 3 [Source:HGNC Symbol;Acc:HGNC:10021]                   |
| MLKL      | mixed lineage kinase domain-like [Source:HGNC Symbol;Acc:HGNC:26617]                                 |
| DNM1L     | dynamitin 1-like [Source:HGNC Symbol;Acc:HGNC:2973]                                                  |
| FADD      | Fas associated via death domain [Source:HGNC Symbol;Acc:HGNC:3573]                                   |
| CASP10    | caspase 10 [Source:HGNC Symbol;Acc:HGNC:1500]                                                        |
| CCL20     | C-C motif chemokine ligand 20 [Source:HGNC Symbol;Acc:HGNC:10619]                                    |
| CXCL5     | C-X-C motif chemokine ligand 5 [Source:HGNC Symbol;Acc:HGNC:10642]                                   |
| CXCL6     | C-X-C motif chemokine ligand 6 [Source:HGNC Symbol;Acc:HGNC:10643]                                   |
| CX3CL1    | C-X3-C motif chemokine ligand 1 [Source:HGNC Symbol;Acc:HGNC:10647]                                  |
| IL18R1    | interleukin 18 receptor 1 [Source:HGNC Symbol;Acc:HGNC:5988]                                         |
| JUNB      | JunB proto-oncogene, AP-1 transcription factor subunit [Source:HGNC Symbol;Acc:HGNC:6205]            |
| MMP14     | matrix metalloproteinase 14 [Source:HGNC Symbol;Acc:HGNC:7160]                                       |
| TNFRSF1B  | tumor necrosis factor receptor superfamily member 1B [Source:HGNC Symbol;Acc:HGNC:11917]             |
| DAB2IP    | DAB2 interacting protein [Source:HGNC Symbol;Acc:HGNC:17294]                                         |
| IRF1      | interferon regulatory factor 1 [Source:HGNC Symbol;Acc:HGNC:6116]                                    |
| SKP2      | S-phase kinase-associated protein 2, E3 ubiquitin protein ligase [Source:HGNC Symbol;Acc:HGNC:10901] |
| SETD7     | SET domain containing lysine methyltransferase 7 [Source:HGNC Symbol;Acc:HGNC:30412]                 |
| USP7      | ubiquitin specific peptidase 7 (herpes virus-associated) [Source:HGNC Symbol;Acc:HGNC:12630]         |
| HOMER1    | homer scaffolding protein 1 [Source:HGNC Symbol;Acc:HGNC:17512]                                      |
| HOMER2    | homer scaffolding protein 2 [Source:HGNC Symbol;Acc:HGNC:17513]                                      |
| HOMER3    | homer scaffolding protein 3 [Source:HGNC Symbol;Acc:HGNC:17514]                                      |
| AGAP2     | ArfGAP with GTPase domain, ankyrin repeat and PH domain 2 [Source:HGNC Symbol;Acc:HGNC:16921]        |
| FOXG1     | forkhead box G1 [Source:HGNC Symbol;Acc:HGNC:3811]                                                   |

|         |                                                                                                             |
|---------|-------------------------------------------------------------------------------------------------------------|
| CCNB1   | cyclin B1 [Source:HGNC Symbol;Acc:HGNC:1579]                                                                |
| CCNB2   | cyclin B2 [Source:HGNC Symbol;Acc:HGNC:1580]                                                                |
| CCNB3   | cyclin B3 [Source:HGNC Symbol;Acc:HGNC:18709]                                                               |
| CCNG2   | cyclin G2 [Source:HGNC Symbol;Acc:HGNC:1593]                                                                |
| CDKN2D  | cyclin dependent kinase inhibitor 2D [Source:HGNC Symbol;Acc:HGNC:1790]                                     |
| PLK1    | polo like kinase 1 [Source:HGNC Symbol;Acc:HGNC:9077]                                                       |
| PLK2    | polo like kinase 2 [Source:HGNC Symbol;Acc:HGNC:19699]                                                      |
| PLK3    | polo like kinase 3 [Source:HGNC Symbol;Acc:HGNC:2154]                                                       |
| PLK4    | polo like kinase 4 [Source:HGNC Symbol;Acc:HGNC:11397]                                                      |
| BCL6    | B-cell CLL/lymphoma 6 [Source:HGNC Symbol;Acc:HGNC:1001]                                                    |
| S1PR1   | sphingosine-1-phosphate receptor 1 [Source:HGNC Symbol;Acc:HGNC:3165]                                       |
| S1PR4   | sphingosine-1-phosphate receptor 4 [Source:HGNC Symbol;Acc:HGNC:3170]                                       |
| RAG1    | recombination activating gene 1 [Source:HGNC Symbol;Acc:HGNC:9831]                                          |
| RAG2    | recombination activating gene 2 [Source:HGNC Symbol;Acc:HGNC:9832]                                          |
| FBXO25  | F-box protein 25 [Source:HGNC Symbol;Acc:HGNC:13596]                                                        |
| FBXO32  | F-box protein 32 [Source:HGNC Symbol;Acc:HGNC:16731]                                                        |
| PI4KA   | phosphatidylinositol 4-kinase alpha [Source:HGNC Symbol;Acc:HGNC:8983]                                      |
| PI4KB   | phosphatidylinositol 4-kinase beta [Source:HGNC Symbol;Acc:HGNC:8984]                                       |
| PI4K2A  | phosphatidylinositol 4-kinase type 2 alpha [Source:HGNC Symbol;Acc:HGNC:30031]                              |
| PI4K2B  | phosphatidylinositol 4-kinase type 2 beta [Source:HGNC Symbol;Acc:HGNC:18215]                               |
| SACM1L  | SAC1 suppressor of actin mutations 1-like (yeast) [Source:HGNC Symbol;Acc:HGNC:17059]                       |
| INPP5F  | inositol polyphosphate-5-phosphatase F [Source:HGNC Symbol;Acc:HGNC:17054]                                  |
| OCRL    | OCRL, inositol polyphosphate-5-phosphatase [Source:HGNC Symbol;Acc:HGNC:8108]                               |
| INPP5B  | inositol polyphosphate-5-phosphatase B [Source:HGNC Symbol;Acc:HGNC:6077]                                   |
| INPP5E  | inositol polyphosphate-5-phosphatase E [Source:HGNC Symbol;Acc:HGNC:21474]                                  |
| SYNJ1   | synaptojanin 1 [Source:HGNC Symbol;Acc:HGNC:11503]                                                          |
| SYNJ2   | synaptojanin 2 [Source:HGNC Symbol;Acc:HGNC:11504]                                                          |
| INPP5D  | inositol polyphosphate-5-phosphatase D [Source:HGNC Symbol;Acc:HGNC:6079]                                   |
| INPPL1  | inositol polyphosphate phosphatase like 1 [Source:HGNC Symbol;Acc:HGNC:6080]                                |
| INPP4A  | inositol polyphosphate-4-phosphatase type I A [Source:HGNC Symbol;Acc:HGNC:6074]                            |
| INPP4B  | inositol polyphosphate-4-phosphatase type II B [Source:HGNC Symbol;Acc:HGNC:6075]                           |
| MTM1    | myotubularin 1 [Source:HGNC Symbol;Acc:HGNC:7448]                                                           |
| MTMR1   | myotubularin related protein 1 [Source:HGNC Symbol;Acc:HGNC:7449]                                           |
| MTMR2   | myotubularin related protein 2 [Source:HGNC Symbol;Acc:HGNC:7450]                                           |
| MTMR8   | myotubularin related protein 8 [Source:HGNC Symbol;Acc:HGNC:16825]                                          |
| MTMR6   | myotubularin related protein 6 [Source:HGNC Symbol;Acc:HGNC:7453]                                           |
| MTMR7   | myotubularin related protein 7 [Source:HGNC Symbol;Acc:HGNC:7454]                                           |
| PIK3C2G | phosphatidylinositol-4-phosphate 3-kinase catalytic subunit type 2 gamma [Source:HGNC Symbol;Acc:HGNC:8973] |
| PIK3C2A | phosphatidylinositol-4-phosphate 3-kinase catalytic subunit type 2 alpha [Source:HGNC Symbol;Acc:HGNC:8971] |

|         |                                                                                                            |
|---------|------------------------------------------------------------------------------------------------------------|
| PIK3C2B | phosphatidylinositol-4-phosphate 3-kinase catalytic subunit type 2 beta [Source:HGNC Symbol;Acc:HGNC:8972] |
| PLCD1   | phospholipase C delta 1 [Source:HGNC Symbol;Acc:HGNC:9060]                                                 |
| PLCD3   | phospholipase C delta 3 [Source:HGNC Symbol;Acc:HGNC:9061]                                                 |
| PLCD4   | phospholipase C delta 4 [Source:HGNC Symbol;Acc:HGNC:9062]                                                 |
| PLCZ1   | phospholipase C zeta 1 [Source:HGNC Symbol;Acc:HGNC:19218]                                                 |
| IPMK    | inositol polyphosphate multikinase [Source:HGNC Symbol;Acc:HGNC:20739]                                     |
| ITPKB   | inositol-trisphosphate 3-kinase B [Source:HGNC Symbol;Acc:HGNC:6179]                                       |
| ITPKA   | inositol-trisphosphate 3-kinase A [Source:HGNC Symbol;Acc:HGNC:6178]                                       |
| ITPKC   | inositol-trisphosphate 3-kinase C [Source:HGNC Symbol;Acc:HGNC:14897]                                      |
| INPP5A  | inositol polyphosphate-5-phosphatase A [Source:HGNC Symbol;Acc:HGNC:6076]                                  |
| ITPK1   | inositol-tetrakisphosphate 1-kinase [Source:HGNC Symbol;Acc:HGNC:6177]                                     |
| IPPK    | inositol-pentakisphosphate 2-kinase [Source:HGNC Symbol;Acc:HGNC:14645]                                    |
| IP6K1   | inositol hexakisphosphate kinase 1 [Source:HGNC Symbol;Acc:HGNC:18360]                                     |
| IP6K2   | inositol hexakisphosphate kinase 2 [Source:HGNC Symbol;Acc:HGNC:17313]                                     |
| IP6K3   | inositol hexakisphosphate kinase 3 [Source:HGNC Symbol;Acc:HGNC:17269]                                     |
| PPIP5K1 | diphosphoinositol pentakisphosphate kinase 1 [Source:HGNC Symbol;Acc:HGNC:29023]                           |
| PPIP5K2 | diphosphoinositol pentakisphosphate kinase 2 [Source:HGNC Symbol;Acc:HGNC:29035]                           |
| INPP1   | inositol polyphosphate-1-phosphatase [Source:HGNC Symbol;Acc:HGNC:6071]                                    |
| IMPA2   | inositol monophosphatase 2 [Source:HGNC Symbol;Acc:HGNC:6051]                                              |
| IMPA1   | inositol monophosphatase 1 [Source:HGNC Symbol;Acc:HGNC:6050]                                              |
| DGKZ    | diacylglycerol kinase zeta [Source:HGNC Symbol;Acc:HGNC:2857]                                              |
| DGKD    | diacylglycerol kinase delta [Source:HGNC Symbol;Acc:HGNC:2851]                                             |
| DGKI    | diacylglycerol kinase iota [Source:HGNC Symbol;Acc:HGNC:2855]                                              |
| DGKA    | diacylglycerol kinase alpha [Source:HGNC Symbol;Acc:HGNC:2849]                                             |
| DGKE    | diacylglycerol kinase epsilon [Source:HGNC Symbol;Acc:HGNC:2852]                                           |
| DGKB    | diacylglycerol kinase beta [Source:HGNC Symbol;Acc:HGNC:2850]                                              |
| DGKH    | diacylglycerol kinase eta [Source:HGNC Symbol;Acc:HGNC:2854]                                               |
| DGKG    | diacylglycerol kinase gamma [Source:HGNC Symbol;Acc:HGNC:2853]                                             |
| DGKQ    | diacylglycerol kinase theta [Source:HGNC Symbol;Acc:HGNC:2856]                                             |
| DGKK    | diacylglycerol kinase kappa [Source:HGNC Symbol;Acc:HGNC:32395]                                            |
| CDS1    | CDP-diacylglycerol synthase 1 [Source:HGNC Symbol;Acc:HGNC:1800]                                           |
| CDS2    | CDP-diacylglycerol synthase 2 [Source:HGNC Symbol;Acc:HGNC:1801]                                           |
| CDIPT   | CDP-diacylglycerol--inositol 3-phosphatidyltransferase [Source:HGNC Symbol;Acc:HGNC:1769]                  |
| IMPAD1  | inositol monophosphatase domain containing 1 [Source:HGNC Symbol;Acc:HGNC:26019]                           |
| TMEM55B | transmembrane protein 55B [Source:HGNC Symbol;Acc:HGNC:19299]                                              |
| TMEM55A | transmembrane protein 55A [Source:HGNC Symbol;Acc:HGNC:25452]                                              |
| SLC3A2  | solute carrier family 3 member 2 [Source:HGNC Symbol;Acc:HGNC:11026]                                       |
| SLC38A9 | solute carrier family 38 member 9 [Source:HGNC Symbol;Acc:HGNC:26907]                                      |
| LAMTOR1 | late endosomal/lysosomal adaptor, MAPK and MTOR activator 1 [Source:HGNC Symbol;Acc:HGNC:26068]            |

|          |                                                                                                  |
|----------|--------------------------------------------------------------------------------------------------|
| LAMTOR2  | late endosomal/lysosomal adaptor, MAPK and MTOR activator 2 [Source:HGNC Symbol;Acc:HGNC:29796]  |
| LAMTOR4  | late endosomal/lysosomal adaptor, MAPK and MTOR activator 4 [Source:HGNC Symbol;Acc:HGNC:33772]  |
| LAMTOR5  | late endosomal/lysosomal adaptor, MAPK and MTOR activator 5 [Source:HGNC Symbol;Acc:HGNC:17955]  |
| FLCN     | folliculin [Source:HGNC Symbol;Acc:HGNC:27310]                                                   |
| FNIP1    | folliculin interacting protein 1 [Source:HGNC Symbol;Acc:HGNC:29418]                             |
| FNIP2    | folliculin interacting protein 2 [Source:HGNC Symbol;Acc:HGNC:29280]                             |
| MIOS     | meiosis regulator for oocyte development [Source:HGNC Symbol;Acc:HGNC:21905]                     |
| SEH1L    | SEH1 like nucleoporin [Source:HGNC Symbol;Acc:HGNC:30379]                                        |
| WDR24    | WD repeat domain 24 [Source:HGNC Symbol;Acc:HGNC:20852]                                          |
| WDR59    | WD repeat domain 59 [Source:HGNC Symbol;Acc:HGNC:25706]                                          |
| SEC13    | SEC13 homolog, nuclear pore and COPII coat complex component [Source:HGNC Symbol;Acc:HGNC:10697] |
| DEPDC5   | DEP domain containing 5 [Source:HGNC Symbol;Acc:HGNC:18423]                                      |
| NPRL2    | NPR2-like, GATOR1 complex subunit [Source:HGNC Symbol;Acc:HGNC:24969]                            |
| NPRL3    | NPR3 like, GATOR1 complex subunit [Source:HGNC Symbol;Acc:HGNC:14124]                            |
| RNF152   | ring finger protein 152 [Source:HGNC Symbol;Acc:HGNC:26811]                                      |
| TELO2    | telomere maintenance 2 [Source:HGNC Symbol;Acc:HGNC:29099]                                       |
| TTI1     | TELO2 interacting protein 1 [Source:HGNC Symbol;Acc:HGNC:29029]                                  |
| CLIP1    | CAP-Gly domain containing linker protein 1 [Source:HGNC Symbol;Acc:HGNC:10461]                   |
| GRB10    | growth factor receptor bound protein 10 [Source:HGNC Symbol;Acc:HGNC:4564]                       |
| LPIN1    | lipin 1 [Source:HGNC Symbol;Acc:HGNC:13345]                                                      |
| LPIN3    | lipin 3 [Source:HGNC Symbol;Acc:HGNC:14451]                                                      |
| LPIN2    | lipin 2 [Source:HGNC Symbol;Acc:HGNC:14450]                                                      |
| TBC1D7   | TBC1 domain family member 7 [Source:HGNC Symbol;Acc:HGNC:21066]                                  |
| MAPKAP1  | mitogen-activated protein kinase associated protein 1 [Source:HGNC Symbol;Acc:HGNC:18752]        |
| RICTOR   | RPTOR independent companion of MTOR complex 2 [Source:HGNC Symbol;Acc:HGNC:28611]                |
| PRR5     | proline rich 5 [Source:HGNC Symbol;Acc:HGNC:31682]                                               |
| GATSL3   | GATS protein-like 3 [Source:HGNC Symbol;Acc:HGNC:34423]                                          |
| GATSL2   | GATS protein-like 2 [Source:HGNC Symbol;Acc:HGNC:37073]                                          |
| CHEK2    | checkpoint kinase 2 [Source:HGNC Symbol;Acc:HGNC:16627]                                          |
| ATR      | ATR serine/threonine kinase [Source:HGNC Symbol;Acc:HGNC:882]                                    |
| CHEK1    | checkpoint kinase 1 [Source:HGNC Symbol;Acc:HGNC:1925]                                           |
| GORAB    | golgin, RAB6 interacting [Source:HGNC Symbol;Acc:HGNC:25676]                                     |
| MDM4     | MDM4, p53 regulator [Source:HGNC Symbol;Acc:HGNC:6974]                                           |
| SFN      | stratifin [Source:HGNC Symbol;Acc:HGNC:10773]                                                    |
| RPRM     | reprimin, TP53 dependent G2 arrest mediator candidate [Source:HGNC Symbol;Acc:HGNC:24201]        |
| GTSE1    | G2 and S-phase expressed 1 [Source:HGNC Symbol;Acc:HGNC:13698]                                   |
| PMAIP1   | phorbol-12-myristate-13-acetate-induced protein 1 [Source:HGNC Symbol;Acc:HGNC:9108]             |
| TP53AIP1 | tumor protein p53 regulated apoptosis inducing protein 1 [Source:HGNC Symbol;Acc:HGNC:29984]     |

|          |                                                                                                    |
|----------|----------------------------------------------------------------------------------------------------|
| SIVA1    | SIVA1 apoptosis inducing factor [Source:HGNC Symbol;Acc:HGNC:17712]                                |
| TP53I3   | tumor protein p53 inducible protein 3 [Source:HGNC Symbol;Acc:HGNC:19373]                          |
| SHISA5   | shisa family member 5 [Source:HGNC Symbol;Acc:HGNC:30376]                                          |
| PERP     | PERP, TP53 apoptosis effector [Source:HGNC Symbol;Acc:HGNC:17637]                                  |
| ZMAT3    | zinc finger matrin-type 3 [Source:HGNC Symbol;Acc:HGNC:29983]                                      |
| AIFM2    | apoptosis inducing factor, mitochondria associated 2 [Source:HGNC Symbol;Acc:HGNC:21411]           |
| IGFBP3   | insulin like growth factor binding protein 3 [Source:HGNC Symbol;Acc:HGNC:5472]                    |
| ADGRB1   | adhesion G protein-coupled receptor B1 [Source:HGNC Symbol;Acc:HGNC:943]                           |
| CD82     | CD82 molecule [Source:HGNC Symbol;Acc:HGNC:6210]                                                   |
| SERPINB5 | serpin family B member 5 [Source:HGNC Symbol;Acc:HGNC:8949]                                        |
| DDB2     | damage specific DNA binding protein 2 [Source:HGNC Symbol;Acc:HGNC:2718]                           |
| RRM2B    | ribonucleotide reductase regulatory TP53 inducible subunit M2B [Source:HGNC Symbol;Acc:HGNC:17296] |
| RRM2     | ribonucleotide reductase regulatory subunit M2 [Source:HGNC Symbol;Acc:HGNC:10452]                 |
| STEAP3   | STEAP3 metalloreductase [Source:HGNC Symbol;Acc:HGNC:24592]                                        |
| RCHY1    | ring finger and CHY zinc finger domain containing 1 [Source:HGNC Symbol;Acc:HGNC:17479]            |
| CCNG1    | cyclin G1 [Source:HGNC Symbol;Acc:HGNC:1592]                                                       |
| PPM1D    | protein phosphatase, Mg2+/Mn2+ dependent 1D [Source:HGNC Symbol;Acc:HGNC:9277]                     |
| RFWD2    | ring finger and WD repeat domain 2 [Source:HGNC Symbol;Acc:HGNC:17440]                             |
| BAK1     | BCL2 antagonist/killer 1 [Source:HGNC Symbol;Acc:HGNC:949]                                         |
| DIABLO   | diablo IAP-binding mitochondrial protein [Source:HGNC Symbol;Acc:HGNC:21528]                       |
| HTRA2    | HtrA serine peptidase 2 [Source:HGNC Symbol;Acc:HGNC:14348]                                        |
| PRF1     | perforin 1 [Source:HGNC Symbol;Acc:HGNC:9360]                                                      |
| GZMB     | granzyme B [Source:HGNC Symbol;Acc:HGNC:4709]                                                      |
| SPTAN1   | spectrin alpha, non-erythrocytic 1 [Source:HGNC Symbol;Acc:HGNC:11273]                             |
| LMNA     | lamin A/C [Source:HGNC Symbol;Acc:HGNC:6636]                                                       |
| LMNB1    | lamin B1 [Source:HGNC Symbol;Acc:HGNC:6637]                                                        |
| LMNB2    | lamin B2 [Source:HGNC Symbol;Acc:HGNC:6638]                                                        |
| PARP2    | poly(ADP-ribose) polymerase 2 [Source:HGNC Symbol;Acc:HGNC:272]                                    |
| PARP3    | poly(ADP-ribose) polymerase family member 3 [Source:HGNC Symbol;Acc:HGNC:273]                      |
| PARP4    | poly(ADP-ribose) polymerase family member 4 [Source:HGNC Symbol;Acc:HGNC:271]                      |
| DFFA     | DNA fragmentation factor subunit alpha [Source:HGNC Symbol;Acc:HGNC:2772]                          |
| DFFB     | DNA fragmentation factor subunit beta [Source:HGNC Symbol;Acc:HGNC:2773]                           |
| ENDOG    | endonuclease G [Source:HGNC Symbol;Acc:HGNC:3346]                                                  |
| AIFM1    | apoptosis inducing factor, mitochondria associated 1 [Source:HGNC Symbol;Acc:HGNC:8768]            |
| CAPN1    | calpain 1 [Source:HGNC Symbol;Acc:HGNC:1476]                                                       |
| CTSC     | cathepsin C [Source:HGNC Symbol;Acc:HGNC:2528]                                                     |
| CTSF     | cathepsin F [Source:HGNC Symbol;Acc:HGNC:2531]                                                     |
| CTSH     | cathepsin H [Source:HGNC Symbol;Acc:HGNC:2535]                                                     |
| CTSK     | cathepsin K [Source:HGNC Symbol;Acc:HGNC:2536]                                                     |
| CTSO     | cathepsin O [Source:HGNC Symbol;Acc:HGNC:2542]                                                     |
| CTSS     | cathepsin S [Source:HGNC Symbol;Acc:HGNC:2545]                                                     |

|          |                                                                                       |
|----------|---------------------------------------------------------------------------------------|
| CTSV     | cathepsin V [Source:HGNC Symbol;Acc:HGNC:2538]                                        |
| CTSW     | cathepsin W [Source:HGNC Symbol;Acc:HGNC:2546]                                        |
| CTSZ     | cathepsin Z [Source:HGNC Symbol;Acc:HGNC:2547]                                        |
| HRK      | harakiri, BCL2 interacting protein [Source:HGNC Symbol;Acc:HGNC:5185]                 |
| PTPN13   | protein tyrosine phosphatase, non-receptor type 13 [Source:HGNC Symbol;Acc:HGNC:9646] |
| CASP2    | caspase 2 [Source:HGNC Symbol;Acc:HGNC:1503]                                          |
| C17orf47 | chromosome 17 open reading frame 47 [Source:HGNC Symbol;Acc:HGNC:26844]               |
| UBA1     | ubiquitin like modifier activating enzyme 1 [Source:HGNC Symbol;Acc:HGNC:12469]       |
| SAE1     | SUMO1 activating enzyme subunit 1 [Source:HGNC Symbol;Acc:HGNC:30660]                 |
| UBA2     | ubiquitin like modifier activating enzyme 2 [Source:HGNC Symbol;Acc:HGNC:30661]       |
| UBA3     | ubiquitin like modifier activating enzyme 3 [Source:HGNC Symbol;Acc:HGNC:12470]       |
| UBA7     | ubiquitin like modifier activating enzyme 7 [Source:HGNC Symbol;Acc:HGNC:12471]       |
| UBA6     | ubiquitin like modifier activating enzyme 6 [Source:HGNC Symbol;Acc:HGNC:25581]       |
| UBE2A    | ubiquitin conjugating enzyme E2 A [Source:HGNC Symbol;Acc:HGNC:12472]                 |
| UBE2B    | ubiquitin conjugating enzyme E2 B [Source:HGNC Symbol;Acc:HGNC:12473]                 |
| UBE2C    | ubiquitin conjugating enzyme E2 C [Source:HGNC Symbol;Acc:HGNC:15937]                 |
| UBE2D4   | ubiquitin conjugating enzyme E2 D4 (putative) [Source:HGNC Symbol;Acc:HGNC:21647]     |
| UBE2D1   | ubiquitin conjugating enzyme E2 D1 [Source:HGNC Symbol;Acc:HGNC:12474]                |
| UBE2D2   | ubiquitin conjugating enzyme E2 D2 [Source:HGNC Symbol;Acc:HGNC:12475]                |
| UBE2D3   | ubiquitin conjugating enzyme E2 D3 [Source:HGNC Symbol;Acc:HGNC:12476]                |
| UBE2E3   | ubiquitin conjugating enzyme E2 E3 [Source:HGNC Symbol;Acc:HGNC:12479]                |
| UBE2E1   | ubiquitin conjugating enzyme E2 E1 [Source:HGNC Symbol;Acc:HGNC:12477]                |
| UBE2E2   | ubiquitin conjugating enzyme E2 E2 [Source:HGNC Symbol;Acc:HGNC:12478]                |
| UBE2F    | ubiquitin conjugating enzyme E2 F (putative) [Source:HGNC Symbol;Acc:HGNC:12480]      |
| UBE2G1   | ubiquitin conjugating enzyme E2 G1 [Source:HGNC Symbol;Acc:HGNC:12482]                |
| UBE2G2   | ubiquitin conjugating enzyme E2 G2 [Source:HGNC Symbol;Acc:HGNC:12483]                |
| UBE2H    | ubiquitin conjugating enzyme E2 H [Source:HGNC Symbol;Acc:HGNC:12484]                 |
| UBE2J1   | ubiquitin conjugating enzyme E2 J1 [Source:HGNC Symbol;Acc:HGNC:17598]                |
| UBE2J2   | ubiquitin conjugating enzyme E2 J2 [Source:HGNC Symbol;Acc:HGNC:19268]                |
| UBE2L3   | ubiquitin conjugating enzyme E2 L3 [Source:HGNC Symbol;Acc:HGNC:12488]                |
| UBE2L6   | ubiquitin conjugating enzyme E2 L6 [Source:HGNC Symbol;Acc:HGNC:12490]                |
| UBE2M    | ubiquitin conjugating enzyme E2 M [Source:HGNC Symbol;Acc:HGNC:12491]                 |
| UBE2N    | ubiquitin conjugating enzyme E2 N [Source:HGNC Symbol;Acc:HGNC:12492]                 |
| UBE2O    | ubiquitin conjugating enzyme E2 O [Source:HGNC Symbol;Acc:HGNC:29554]                 |
| UBE2Q1   | ubiquitin conjugating enzyme E2 Q1 [Source:HGNC Symbol;Acc:HGNC:15698]                |
| UBE2Q2   | ubiquitin conjugating enzyme E2 Q2 [Source:HGNC Symbol;Acc:HGNC:19248]                |
| UBE2QL1  | ubiquitin conjugating enzyme E2 Q family like 1 [Source:HGNC Symbol;Acc:HGNC:37269]   |
| UBE2R2   | ubiquitin conjugating enzyme E2 R2 [Source:HGNC Symbol;Acc:HGNC:19907]                |
| CDC34    | cell division cycle 34 [Source:HGNC Symbol;Acc:HGNC:1734]                             |
| UBE2S    | ubiquitin conjugating enzyme E2 S [Source:HGNC Symbol;Acc:HGNC:17895]                 |
| UBE2U    | ubiquitin conjugating enzyme E2 U (putative) [Source:HGNC Symbol;Acc:HGNC:28559]      |

|        |                                                                                                               |
|--------|---------------------------------------------------------------------------------------------------------------|
| UBE2W  | ubiquitin conjugating enzyme E2 W (putative) [Source:HGNC Symbol;Acc:HGNC:25616]                              |
| UBE2Z  | ubiquitin conjugating enzyme E2 Z [Source:HGNC Symbol;Acc:HGNC:25847]                                         |
| UBE2K  | ubiquitin conjugating enzyme E2 K [Source:HGNC Symbol;Acc:HGNC:4914]                                          |
| BIRC6  | baculoviral IAP repeat containing 6 [Source:HGNC Symbol;Acc:HGNC:13516]                                       |
| UBE3A  | ubiquitin protein ligase E3A [Source:HGNC Symbol;Acc:HGNC:12496]                                              |
| UBE3B  | ubiquitin protein ligase E3B [Source:HGNC Symbol;Acc:HGNC:13478]                                              |
| UBE3C  | ubiquitin protein ligase E3C [Source:HGNC Symbol;Acc:HGNC:16803]                                              |
| WWP1   | WW domain containing E3 ubiquitin protein ligase 1 [Source:HGNC Symbol;Acc:HGNC:17004]                        |
| WWP2   | WW domain containing E3 ubiquitin protein ligase 2 [Source:HGNC Symbol;Acc:HGNC:16804]                        |
| TRIP12 | thyroid hormone receptor interactor 12 [Source:HGNC Symbol;Acc:HGNC:12306]                                    |
| HUWE1  | HECT, UBA and WWE domain containing 1, E3 ubiquitin protein ligase [Source:HGNC Symbol;Acc:HGNC:30892]        |
| UBR5   | ubiquitin protein ligase E3 component n-recognin 5 [Source:HGNC Symbol;Acc:HGNC:16806]                        |
| HERC1  | HECT and RLD domain containing E3 ubiquitin protein ligase family member 1 [Source:HGNC Symbol;Acc:HGNC:4867] |
| HERC2  | HECT and RLD domain containing E3 ubiquitin protein ligase 2 [Source:HGNC Symbol;Acc:HGNC:4868]               |
| HERC3  | HECT and RLD domain containing E3 ubiquitin protein ligase 3 [Source:HGNC Symbol;Acc:HGNC:4876]               |
| HERC4  | HECT and RLD domain containing E3 ubiquitin protein ligase 4 [Source:HGNC Symbol;Acc:HGNC:24521]              |
| UBE4A  | ubiquitination factor E4A [Source:HGNC Symbol;Acc:HGNC:12499]                                                 |
| UBE4B  | ubiquitination factor E4B [Source:HGNC Symbol;Acc:HGNC:12500]                                                 |
| STUB1  | STIP1 homology and U-box containing protein 1 [Source:HGNC Symbol;Acc:HGNC:11427]                             |
| PPIL2  | peptidylprolyl isomerase like 2 [Source:HGNC Symbol;Acc:HGNC:9261]                                            |
| PRPF19 | pre-mRNA processing factor 19 [Source:HGNC Symbol;Acc:HGNC:17896]                                             |
| UBOX5  | U-box domain containing 5 [Source:HGNC Symbol;Acc:HGNC:17777]                                                 |
| CBL    | Cbl proto-oncogene [Source:HGNC Symbol;Acc:HGNC:1541]                                                         |
| CBLB   | Cbl proto-oncogene B [Source:HGNC Symbol;Acc:HGNC:1542]                                                       |
| CBLC   | Cbl proto-oncogene C [Source:HGNC Symbol;Acc:HGNC:15961]                                                      |
| PML    | promyelocytic leukemia [Source:HGNC Symbol;Acc:HGNC:9113]                                                     |
| BIRC7  | baculoviral IAP repeat containing 7 [Source:HGNC Symbol;Acc:HGNC:13702]                                       |
| SYVN1  | synoviolin 1 [Source:HGNC Symbol;Acc:HGNC:20738]                                                              |
| NHLRC1 | NHL repeat containing E3 ubiquitin protein ligase 1 [Source:HGNC Symbol;Acc:HGNC:21576]                       |
| AIRE   | autoimmune regulator [Source:HGNC Symbol;Acc:HGNC:360]                                                        |
| FANCL  | Fanconi anemia complementation group L [Source:HGNC Symbol;Acc:HGNC:20748]                                    |
| MID1   | midline 1 [Source:HGNC Symbol;Acc:HGNC:7095]                                                                  |
| TRIM32 | tripartite motif containing 32 [Source:HGNC Symbol;Acc:HGNC:16380]                                            |
| TRIM37 | tripartite motif containing 37 [Source:HGNC Symbol;Acc:HGNC:7523]                                             |
| FBXW7  | F-box and WD repeat domain containing 7 [Source:HGNC Symbol;Acc:HGNC:16712]                                   |
| FBXO2  | F-box protein 2 [Source:HGNC Symbol;Acc:HGNC:13581]                                                           |
| FBXO4  | F-box protein 4 [Source:HGNC Symbol;Acc:HGNC:13583]                                                           |
| KLHL9  | kelch like family member 9 [Source:HGNC Symbol;Acc:HGNC:18732]                                                |



|         |                                                                                                 |
|---------|-------------------------------------------------------------------------------------------------|
| KLHL13  | kelch like family member 13 [Source:HGNC Symbol;Acc:HGNC:22931]                                 |
| RHOBTB2 | Rho related BTB domain containing 2 [Source:HGNC Symbol;Acc:HGNC:18756]                         |
| RHOBTB1 | Rho related BTB domain containing 1 [Source:HGNC Symbol;Acc:HGNC:18738]                         |
| CUL4B   | cullin 4B [Source:HGNC Symbol;Acc:HGNC:2555]                                                    |
| CUL4A   | cullin 4A [Source:HGNC Symbol;Acc:HGNC:2554]                                                    |
| DDB1    | damage specific DNA binding protein 1 [Source:HGNC Symbol;Acc:HGNC:2717]                        |
| ERCC8   | ERCC excision repair 8, CSA ubiquitin ligase complex subunit [Source:HGNC Symbol;Acc:HGNC:3439] |
| DET1    | de-etiolated homolog 1 (Arabidopsis) [Source:HGNC Symbol;Acc:HGNC:25477]                        |
| RNF7    | ring finger protein 7 [Source:HGNC Symbol;Acc:HGNC:10070]                                       |
| CUL5    | cullin 5 [Source:HGNC Symbol;Acc:HGNC:2556]                                                     |
| CUL7    | cullin 7 [Source:HGNC Symbol;Acc:HGNC:21024]                                                    |
| FBXW8   | F-box and WD repeat domain containing 8 [Source:HGNC Symbol;Acc:HGNC:13597]                     |
| ANAPC11 | anaphase promoting complex subunit 11 [Source:HGNC Symbol;Acc:HGNC:14452]                       |
| ANAPC2  | anaphase promoting complex subunit 2 [Source:HGNC Symbol;Acc:HGNC:19989]                        |
| CDC20   | cell division cycle 20 [Source:HGNC Symbol;Acc:HGNC:1723]                                       |
| FZR1    | fizzy/cell division cycle 20 related 1 [Source:HGNC Symbol;Acc:HGNC:24824]                      |
| ANAPC1  | anaphase promoting complex subunit 1 [Source:HGNC Symbol;Acc:HGNC:19988]                        |
| CDC27   | cell division cycle 27 [Source:HGNC Symbol;Acc:HGNC:1728]                                       |
| ANAPC4  | anaphase promoting complex subunit 4 [Source:HGNC Symbol;Acc:HGNC:19990]                        |
| ANAPC5  | anaphase promoting complex subunit 5 [Source:HGNC Symbol;Acc:HGNC:15713]                        |
| CDC16   | cell division cycle 16 [Source:HGNC Symbol;Acc:HGNC:1720]                                       |
| ANAPC7  | anaphase promoting complex subunit 7 [Source:HGNC Symbol;Acc:HGNC:17380]                        |
| CDC23   | cell division cycle 23 [Source:HGNC Symbol;Acc:HGNC:1724]                                       |
| ANAPC10 | anaphase promoting complex subunit 10 [Source:HGNC Symbol;Acc:HGNC:24077]                       |
| CDC26   | cell division cycle 26 [Source:HGNC Symbol;Acc:HGNC:17839]                                      |
| ANAPC13 | anaphase promoting complex subunit 13 [Source:HGNC Symbol;Acc:HGNC:24540]                       |
| ANAPC15 | anaphase promoting complex subunit 15 [Source:HGNC Symbol;Acc:HGNC:24531]                       |
| ANAPC16 | anaphase promoting complex subunit 16 [Source:HGNC Symbol;Acc:HGNC:26976]                       |
| TCEB1   | transcription elongation factor B subunit 1 [Source:HGNC Symbol;Acc:HGNC:11617]                 |
| E2F3    | E2F transcription factor 3 [Source:HGNC Symbol;Acc:HGNC:3115]                                   |
| TFDP2   | transcription factor Dp-2 [Source:HGNC Symbol;Acc:HGNC:11751]                                   |
| ZBTB17  | zinc finger and BTB domain containing 17 [Source:HGNC Symbol;Acc:HGNC:12936]                    |
| CDKN2C  | cyclin dependent kinase inhibitor 2C [Source:HGNC Symbol;Acc:HGNC:1789]                         |
| CDC6    | cell division cycle 6 [Source:HGNC Symbol;Acc:HGNC:1744]                                        |
| CDC45   | cell division cycle 45 [Source:HGNC Symbol;Acc:HGNC:1739]                                       |
| CDC7    | cell division cycle 7 [Source:HGNC Symbol;Acc:HGNC:1745]                                        |
| DBF4    | DBF4 zinc finger [Source:HGNC Symbol;Acc:HGNC:17364]                                            |
| CDC25C  | cell division cycle 25C [Source:HGNC Symbol;Acc:HGNC:1727]                                      |
| WEE1    | WEE1 G2 checkpoint kinase [Source:HGNC Symbol;Acc:HGNC:12761]                                   |
| WEE2    | WEE1 homolog 2 (S. pombe) [Source:HGNC Symbol;Acc:HGNC:19684]                                   |

|        |                                                                                              |
|--------|----------------------------------------------------------------------------------------------|
| PKMYT1 | protein kinase, membrane associated tyrosine/threonine 1 [Source:HGNC Symbol;Acc:HGNC:29650] |
| CCNH   | cyclin H [Source:HGNC Symbol;Acc:HGNC:1594]                                                  |
| CDK7   | cyclin dependent kinase 7 [Source:HGNC Symbol;Acc:HGNC:1778]                                 |
| PTTG1  | pituitary tumor-transforming 1 [Source:HGNC Symbol;Acc:HGNC:9690]                            |
| PTTG2  | pituitary tumor-transforming 2 [Source:HGNC Symbol;Acc:HGNC:9691]                            |
| ESPL1  | extra spindle pole bodies like 1, separase [Source:HGNC Symbol;Acc:HGNC:16856]               |
| SMC1A  | structural maintenance of chromosomes 1A [Source:HGNC Symbol;Acc:HGNC:11111]                 |
| SMC1B  | structural maintenance of chromosomes 1B [Source:HGNC Symbol;Acc:HGNC:11112]                 |
| SMC3   | structural maintenance of chromosomes 3 [Source:HGNC Symbol;Acc:HGNC:2468]                   |
| STAG2  | stromal antigen 2 [Source:HGNC Symbol;Acc:HGNC:11355]                                        |
| STAG1  | stromal antigen 1 [Source:HGNC Symbol;Acc:HGNC:11354]                                        |
| RAD21  | RAD21 cohesin complex component [Source:HGNC Symbol;Acc:HGNC:9811]                           |
| TTK    | TTK protein kinase [Source:HGNC Symbol;Acc:HGNC:12401]                                       |
| BUB1   | BUB1 mitotic checkpoint serine/threonine kinase [Source:HGNC Symbol;Acc:HGNC:1148]           |
| BUB3   | BUB3, mitotic checkpoint protein [Source:HGNC Symbol;Acc:HGNC:1151]                          |
| BUB1B  | BUB1 mitotic checkpoint serine/threonine kinase B [Source:HGNC Symbol;Acc:HGNC:1149]         |
| MAD1L1 | MAD1 mitotic arrest deficient like 1 [Source:HGNC Symbol;Acc:HGNC:6762]                      |
| MAD2L1 | MAD2 mitotic arrest deficient-like 1 (yeast) [Source:HGNC Symbol;Acc:HGNC:6763]              |
| MAD2L2 | MAD2 mitotic arrest deficient-like 2 (yeast) [Source:HGNC Symbol;Acc:HGNC:6764]              |
| CDC14B | cell division cycle 14B [Source:HGNC Symbol;Acc:HGNC:1719]                                   |
| CDC14A | cell division cycle 14A [Source:HGNC Symbol;Acc:HGNC:1718]                                   |
| PRKDC  | protein kinase, DNA-activated, catalytic polypeptide [Source:HGNC Symbol;Acc:HGNC:9413]      |
| CDC25A | cell division cycle 25A [Source:HGNC Symbol;Acc:HGNC:1725]                                   |
| ORC1   | origin recognition complex subunit 1 [Source:HGNC Symbol;Acc:HGNC:8487]                      |
| ORC2   | origin recognition complex subunit 2 [Source:HGNC Symbol;Acc:HGNC:8488]                      |
| ORC3   | origin recognition complex subunit 3 [Source:HGNC Symbol;Acc:HGNC:8489]                      |
| ORC4   | origin recognition complex subunit 4 [Source:HGNC Symbol;Acc:HGNC:8490]                      |
| ORC5   | origin recognition complex subunit 5 [Source:HGNC Symbol;Acc:HGNC:8491]                      |
| ORC6   | origin recognition complex subunit 6 [Source:HGNC Symbol;Acc:HGNC:17151]                     |
| MCM2   | minichromosome maintenance complex component 2 [Source:HGNC Symbol;Acc:HGNC:6944]            |
| MCM3   | minichromosome maintenance complex component 3 [Source:HGNC Symbol;Acc:HGNC:6945]            |
| MCM4   | minichromosome maintenance complex component 4 [Source:HGNC Symbol;Acc:HGNC:6947]            |
| MCM5   | minichromosome maintenance complex component 5 [Source:HGNC Symbol;Acc:HGNC:6948]            |
| MCM6   | minichromosome maintenance complex component 6 [Source:HGNC Symbol;Acc:HGNC:6949]            |
| MCM7   | minichromosome maintenance complex component 7 [Source:HGNC Symbol;Acc:HGNC:6950]            |
| ATP2B1 | ATPase plasma membrane Ca <sup>2+</sup> transporting 1 [Source:HGNC Symbol;Acc:HGNC:814]     |
| ATP2B3 | ATPase plasma membrane Ca <sup>2+</sup> transporting 3 [Source:HGNC Symbol;Acc:HGNC:816]     |
| ATP2B4 | ATPase plasma membrane Ca <sup>2+</sup> transporting 4 [Source:HGNC Symbol;Acc:HGNC:817]     |
| ATP2B2 | ATPase plasma membrane Ca <sup>2+</sup> transporting 2 [Source:HGNC Symbol;Acc:HGNC:815]     |
| ADRB2  | adrenoceptor beta 2 [Source:HGNC Symbol;Acc:HGNC:286]                                        |
| ADRB3  | adrenoceptor beta 3 [Source:HGNC Symbol;Acc:HGNC:288]                                        |

|         |                                                                                                 |
|---------|-------------------------------------------------------------------------------------------------|
| DRD5    | dopamine receptor D5 [Source:HGNC Symbol;Acc:HGNC:3026]                                         |
| HRH2    | histamine receptor H2 [Source:HGNC Symbol;Acc:HGNC:5183]                                        |
| HTR4    | 5-hydroxytryptamine receptor 4 [Source:HGNC Symbol;Acc:HGNC:5299]                               |
| HTR5A   | 5-hydroxytryptamine receptor 5A [Source:HGNC Symbol;Acc:HGNC:5300]                              |
| HTR6    | 5-hydroxytryptamine receptor 6 [Source:HGNC Symbol;Acc:HGNC:5301]                               |
| GNAL    | G protein subunit alpha L [Source:HGNC Symbol;Acc:HGNC:4388]                                    |
| PLN     | phospholamban [Source:HGNC Symbol;Acc:HGNC:9080]                                                |
| ATP2A1  | ATPase sarcoplasmic/endoplasmic reticulum Ca2+ transporting 1 [Source:HGNC Symbol;Acc:HGNC:811] |
| ATP2A3  | ATPase sarcoplasmic/endoplasmic reticulum Ca2+ transporting 3 [Source:HGNC Symbol;Acc:HGNC:813] |
| HRC     | histidine rich calcium binding protein [Source:HGNC Symbol;Acc:HGNC:5178]                       |
| STIM1   | stromal interaction molecule 1 [Source:HGNC Symbol;Acc:HGNC:11386]                              |
| STIM2   | stromal interaction molecule 2 [Source:HGNC Symbol;Acc:HGNC:19205]                              |
| ORAI2   | ORAI calcium release-activated calcium modulator 2 [Source:HGNC Symbol;Acc:HGNC:21667]          |
| ORAI3   | ORAI calcium release-activated calcium modulator 3 [Source:HGNC Symbol;Acc:HGNC:28185]          |
| CHRNA7  | cholinergic receptor nicotinic alpha 7 subunit [Source:HGNC Symbol;Acc:HGNC:1960]               |
| P2RX1   | purinergic receptor P2X 1 [Source:HGNC Symbol;Acc:HGNC:8533]                                    |
| P2RX2   | purinergic receptor P2X 2 [Source:HGNC Symbol;Acc:HGNC:15459]                                   |
| P2RX3   | purinergic receptor P2X 3 [Source:HGNC Symbol;Acc:HGNC:8534]                                    |
| P2RX4   | purinergic receptor P2X 4 [Source:HGNC Symbol;Acc:HGNC:8535]                                    |
| P2RX5   | purinergic receptor P2X 5 [Source:HGNC Symbol;Acc:HGNC:8536]                                    |
| P2RX6   | purinergic receptor P2X 6 [Source:HGNC Symbol;Acc:HGNC:8538]                                    |
| GRIN2C  | glutamate ionotropic receptor NMDA type subunit 2C [Source:HGNC Symbol;Acc:HGNC:4587]           |
| GRIN2D  | glutamate ionotropic receptor NMDA type subunit 2D [Source:HGNC Symbol;Acc:HGNC:4588]           |
| TRDN    | triadin [Source:HGNC Symbol;Acc:HGNC:12261]                                                     |
| CASQ1   | calsequestrin 1 [Source:HGNC Symbol;Acc:HGNC:1512]                                              |
| CASQ2   | calsequestrin 2 [Source:HGNC Symbol;Acc:HGNC:1513]                                              |
| ASPH    | aspartate beta-hydroxylase [Source:HGNC Symbol;Acc:HGNC:757]                                    |
| CYSLTR1 | cysteinyl leukotriene receptor 1 [Source:HGNC Symbol;Acc:HGNC:17451]                            |
| CYSLTR2 | cysteinyl leukotriene receptor 2 [Source:HGNC Symbol;Acc:HGNC:18274]                            |
| ADRA1B  | adrenoceptor alpha 1B [Source:HGNC Symbol;Acc:HGNC:278]                                         |
| ADRA1D  | adrenoceptor alpha 1D [Source:HGNC Symbol;Acc:HGNC:280]                                         |
| EDNRA   | endothelin receptor type A [Source:HGNC Symbol;Acc:HGNC:3179]                                   |
| EDNRB   | endothelin receptor type B [Source:HGNC Symbol;Acc:HGNC:3180]                                   |
| HRH1    | histamine receptor H1 [Source:HGNC Symbol;Acc:HGNC:5182]                                        |
| NTSR1   | neurotensin receptor 1 (high affinity) [Source:HGNC Symbol;Acc:HGNC:8039]                       |
| OXTR    | oxytocin receptor [Source:HGNC Symbol;Acc:HGNC:8529]                                            |
| AVPR1A  | arginine vasopressin receptor 1A [Source:HGNC Symbol;Acc:HGNC:895]                              |
| AVPR1B  | arginine vasopressin receptor 1B [Source:HGNC Symbol;Acc:HGNC:896]                              |
| LTB4R2  | leukotriene B4 receptor 2 [Source:HGNC Symbol;Acc:HGNC:19260]                                   |
| PTAFR   | platelet activating factor receptor [Source:HGNC Symbol;Acc:HGNC:9582]                          |

|          |                                                                                    |
|----------|------------------------------------------------------------------------------------|
| PTGER1   | prostaglandin E receptor 1 [Source:HGNC Symbol;Acc:HGNC:9593]                      |
| PTGER3   | prostaglandin E receptor 3 [Source:HGNC Symbol;Acc:HGNC:9595]                      |
| PTGFR    | prostaglandin F receptor [Source:HGNC Symbol;Acc:HGNC:9600]                        |
| TACR1    | tachykinin receptor 1 [Source:HGNC Symbol;Acc:HGNC:11526]                          |
| TACR2    | tachykinin receptor 2 [Source:HGNC Symbol;Acc:HGNC:11527]                          |
| TACR3    | tachykinin receptor 3 [Source:HGNC Symbol;Acc:HGNC:11528]                          |
| TBXA2R   | thromboxane A2 receptor [Source:HGNC Symbol;Acc:HGNC:11608]                        |
| TRHR     | thyrotropin releasing hormone receptor [Source:HGNC Symbol;Acc:HGNC:12299]         |
| CCKAR    | cholecystokinin A receptor [Source:HGNC Symbol;Acc:HGNC:1570]                      |
| CCKBR    | cholecystokinin B receptor [Source:HGNC Symbol;Acc:HGNC:1571]                      |
| GNA14    | G protein subunit alpha 14 [Source:HGNC Symbol;Acc:HGNC:4382]                      |
| GNA15    | G protein subunit alpha 15 [Source:HGNC Symbol;Acc:HGNC:4383]                      |
| GNDF     | glial cell derived neurotrophic factor [Source:HGNC Symbol;Acc:HGNC:4232]          |
| MST1R    | macrophage stimulating 1 receptor [Source:HGNC Symbol;Acc:HGNC:7381]               |
| CD38     | CD38 molecule [Source:HGNC Symbol;Acc:HGNC:1667]                                   |
| TPCN1    | two pore segment channel 1 [Source:HGNC Symbol;Acc:HGNC:18182]                     |
| TPCN2    | two pore segment channel 2 [Source:HGNC Symbol;Acc:HGNC:20820]                     |
| MCOLN1   | mucolipin 1 [Source:HGNC Symbol;Acc:HGNC:13356]                                    |
| MCOLN2   | mucolipin 2 [Source:HGNC Symbol;Acc:HGNC:13357]                                    |
| MCOLN3   | mucolipin 3 [Source:HGNC Symbol;Acc:HGNC:13358]                                    |
| MCU      | mitochondrial calcium uniporter [Source:HGNC Symbol;Acc:HGNC:23526]                |
| SLC25A4  | solute carrier family 25 member 4 [Source:HGNC Symbol;Acc:HGNC:10990]              |
| SLC25A5  | solute carrier family 25 member 5 [Source:HGNC Symbol;Acc:HGNC:10991]              |
| SLC25A6  | solute carrier family 25 member 6 [Source:HGNC Symbol;Acc:HGNC:10992]              |
| SLC25A31 | solute carrier family 25 member 31 [Source:HGNC Symbol;Acc:HGNC:25319]             |
| TNNC1    | troponin C1, slow skeletal and cardiac type [Source:HGNC Symbol;Acc:HGNC:11943]    |
| TNNC2    | troponin C2, fast skeletal type [Source:HGNC Symbol;Acc:HGNC:11944]                |
| PHKG1    | phosphorylase kinase catalytic subunit gamma 1 [Source:HGNC Symbol;Acc:HGNC:8930]  |
| PHKG2    | phosphorylase kinase catalytic subunit gamma 2 [Source:HGNC Symbol;Acc:HGNC:8931]  |
| PHKB     | phosphorylase kinase regulatory subunit beta [Source:HGNC Symbol;Acc:HGNC:8927]    |
| PHKA2    | phosphorylase kinase regulatory subunit alpha 2 [Source:HGNC Symbol;Acc:HGNC:8926] |
| PHKA1    | phosphorylase kinase regulatory subunit alpha 1 [Source:HGNC Symbol;Acc:HGNC:8925] |
| CAMK1D   | calcium/calmodulin dependent protein kinase ID [Source:HGNC Symbol;Acc:HGNC:19341] |
| CAMK1G   | calcium/calmodulin dependent protein kinase IG [Source:HGNC Symbol;Acc:HGNC:14585] |
| PDE1A    | phosphodiesterase 1A [Source:HGNC Symbol;Acc:HGNC:8774]                            |
| PDE1B    | phosphodiesterase 1B [Source:HGNC Symbol;Acc:HGNC:8775]                            |
| PDE1C    | phosphodiesterase 1C [Source:HGNC Symbol;Acc:HGNC:8776]                            |
| PTK2B    | protein tyrosine kinase 2 beta [Source:HGNC Symbol;Acc:HGNC:9612]                  |
| CD3D     | CD3d molecule [Source:HGNC Symbol;Acc:HGNC:1673]                                   |
| CD3E     | CD3e molecule [Source:HGNC Symbol;Acc:HGNC:1674]                                   |
| CD3G     | CD3g molecule [Source:HGNC Symbol;Acc:HGNC:1675]                                   |

|         |                                                                                    |
|---------|------------------------------------------------------------------------------------|
| CD247   | CD247 molecule [Source:HGNC Symbol;Acc:HGNC:1677]                                  |
| ITK     | IL2 inducible T-cell kinase [Source:HGNC Symbol;Acc:HGNC:6171]                     |
| TEC     | tec protein tyrosine kinase [Source:HGNC Symbol;Acc:HGNC:11719]                    |
| NCK1    | NCK adaptor protein 1 [Source:HGNC Symbol;Acc:HGNC:7664]                           |
| NCK2    | NCK adaptor protein 2 [Source:HGNC Symbol;Acc:HGNC:7665]                           |
| GRAP2   | GRB2-related adaptor protein 2 [Source:HGNC Symbol;Acc:HGNC:4563]                  |
| NFKBIB  | NFKB inhibitor beta [Source:HGNC Symbol;Acc:HGNC:7798]                             |
| NFKBIE  | NFKB inhibitor epsilon [Source:HGNC Symbol;Acc:HGNC:7799]                          |
| GUCY1B3 | guanylate cyclase 1, soluble, beta 3 [Source:HGNC Symbol;Acc:HGNC:4687]            |
| PTGS1   | prostaglandin-endoperoxide synthase 1 [Source:HGNC Symbol;Acc:HGNC:9604]           |
| PTGES   | prostaglandin E synthase [Source:HGNC Symbol;Acc:HGNC:9599]                        |
| PTGES2  | prostaglandin E synthase 2 [Source:HGNC Symbol;Acc:HGNC:17822]                     |
| PTGES3  | prostaglandin E synthase 3 [Source:HGNC Symbol;Acc:HGNC:16049]                     |
| CBR1    | carbonyl reductase 1 [Source:HGNC Symbol;Acc:HGNC:1548]                            |
| CBR3    | carbonyl reductase 3 [Source:HGNC Symbol;Acc:HGNC:1549]                            |
| TBXAS1  | thromboxane A synthase 1 [Source:HGNC Symbol;Acc:HGNC:11609]                       |
| PTGDS   | prostaglandin D2 synthase [Source:HGNC Symbol;Acc:HGNC:9592]                       |
| HPGDS   | hematopoietic prostaglandin D synthase [Source:HGNC Symbol;Acc:HGNC:17890]         |
| PTGIS   | prostaglandin I2 (prostacyclin) synthase [Source:HGNC Symbol;Acc:HGNC:9603]        |
| LTA4H   | leukotriene A4 hydrolase [Source:HGNC Symbol;Acc:HGNC:6710]                        |
| CYP4F2  | cytochrome P450 family 4 subfamily F member 2 [Source:HGNC Symbol;Acc:HGNC:2645]   |
| CYP4F3  | cytochrome P450 family 4 subfamily F member 3 [Source:HGNC Symbol;Acc:HGNC:2646]   |
| LTC4S   | leukotriene C4 synthase [Source:HGNC Symbol;Acc:HGNC:6719]                         |
| GGT1    | gamma-glutamyltransferase 1 [Source:HGNC Symbol;Acc:HGNC:4250]                     |
| GGT5    | gamma-glutamyltransferase 5 [Source:HGNC Symbol;Acc:HGNC:4260]                     |
| GPX6    | glutathione peroxidase 6 [Source:HGNC Symbol;Acc:HGNC:4558]                        |
| GPX7    | glutathione peroxidase 7 [Source:HGNC Symbol;Acc:HGNC:4559]                        |
| GPX2    | glutathione peroxidase 2 [Source:HGNC Symbol;Acc:HGNC:4554]                        |
| GPX1    | glutathione peroxidase 1 [Source:HGNC Symbol;Acc:HGNC:4553]                        |
| GPX5    | glutathione peroxidase 5 [Source:HGNC Symbol;Acc:HGNC:4557]                        |
| GPX8    | glutathione peroxidase 8 (putative) [Source:HGNC Symbol;Acc:HGNC:33100]            |
| CYP4F8  | cytochrome P450 family 4 subfamily F member 8 [Source:HGNC Symbol;Acc:HGNC:2648]   |
| ALOX12  | arachidonate 12-lipoxygenase, 12S type [Source:HGNC Symbol;Acc:HGNC:429]           |
| ALOX12B | arachidonate 12-lipoxygenase, 12R type [Source:HGNC Symbol;Acc:HGNC:430]           |
| ALOX15B | arachidonate 15-lipoxygenase, type B [Source:HGNC Symbol;Acc:HGNC:434]             |
| EPHX2   | epoxide hydrolase 2 [Source:HGNC Symbol;Acc:HGNC:3402]                             |
| ALOX15  | arachidonate 15-lipoxygenase [Source:HGNC Symbol;Acc:HGNC:433]                     |
| FAM213B | family with sequence similarity 213 member B [Source:HGNC Symbol;Acc:HGNC:28390]   |
| TSHB    | thyroid stimulating hormone beta [Source:HGNC Symbol;Acc:HGNC:12372]               |
| TSHR    | thyroid stimulating hormone receptor [Source:HGNC Symbol;Acc:HGNC:12373]           |
| PNPLA2  | patatin like phospholipase domain containing 2 [Source:HGNC Symbol;Acc:HGNC:30802] |

|        |                                                                          |
|--------|--------------------------------------------------------------------------|
| ABHD5  | abhydrolase domain containing 5 [Source:HGNC Symbol;Acc:HGNC:21396]      |
| MGLL   | monoglyceride lipase [Source:HGNC Symbol;Acc:HGNC:17038]                 |
| AQP7   | aquaporin 7 [Source:HGNC Symbol;Acc:HGNC:640]                            |
| ADORA1 | adenosine A1 receptor [Source:HGNC Symbol;Acc:HGNC:262]                  |
| NPY    | neuropeptide Y [Source:HGNC Symbol;Acc:HGNC:7955]                        |
| NPY1R  | neuropeptide Y receptor Y1 [Source:HGNC Symbol;Acc:HGNC:7956]            |
| CCL1   | C-C motif chemokine ligand 1 [Source:HGNC Symbol;Acc:HGNC:10609]         |
| CCL25  | C-C motif chemokine ligand 25 [Source:HGNC Symbol;Acc:HGNC:10624]        |
| CCL3L1 | C-C motif chemokine ligand 3 like 1 [Source:HGNC Symbol;Acc:HGNC:10628]  |
| CCL3L3 | C-C motif chemokine ligand 3 like 3 [Source:HGNC Symbol;Acc:HGNC:30554]  |
| CCL17  | C-C motif chemokine ligand 17 [Source:HGNC Symbol;Acc:HGNC:10615]        |
| CCL22  | C-C motif chemokine ligand 22 [Source:HGNC Symbol;Acc:HGNC:10621]        |
| CCL8   | C-C motif chemokine ligand 8 [Source:HGNC Symbol;Acc:HGNC:10635]         |
| CCL14  | C-C motif chemokine ligand 14 [Source:HGNC Symbol;Acc:HGNC:10612]        |
| CCL16  | C-C motif chemokine ligand 16 [Source:HGNC Symbol;Acc:HGNC:10614]        |
| CCL15  | C-C motif chemokine ligand 15 [Source:HGNC Symbol;Acc:HGNC:10613]        |
| CCL23  | C-C motif chemokine ligand 23 [Source:HGNC Symbol;Acc:HGNC:10622]        |
| CCL7   | C-C motif chemokine ligand 7 [Source:HGNC Symbol;Acc:HGNC:10634]         |
| CCL11  | C-C motif chemokine ligand 11 [Source:HGNC Symbol;Acc:HGNC:10610]        |
| CCL24  | C-C motif chemokine ligand 24 [Source:HGNC Symbol;Acc:HGNC:10623]        |
| CCL26  | C-C motif chemokine ligand 26 [Source:HGNC Symbol;Acc:HGNC:10625]        |
| CCL27  | C-C motif chemokine ligand 27 [Source:HGNC Symbol;Acc:HGNC:10626]        |
| CCL28  | C-C motif chemokine ligand 28 [Source:HGNC Symbol;Acc:HGNC:17700]        |
| CCL18  | C-C motif chemokine ligand 18 [Source:HGNC Symbol;Acc:HGNC:10616]        |
| PPBP   | pro-platelet basic protein [Source:HGNC Symbol;Acc:HGNC:9240]            |
| PF4    | platelet factor 4 [Source:HGNC Symbol;Acc:HGNC:8861]                     |
| PF4V1  | platelet factor 4 variant 1 [Source:HGNC Symbol;Acc:HGNC:8862]           |
| CXCL13 | C-X-C motif chemokine ligand 13 [Source:HGNC Symbol;Acc:HGNC:10639]      |
| CXCL16 | C-X-C motif chemokine ligand 16 [Source:HGNC Symbol;Acc:HGNC:16642]      |
| CXCL17 | C-X-C motif chemokine ligand 17 [Source:HGNC Symbol;Acc:HGNC:19232]      |
| XCL1   | X-C motif chemokine ligand 1 [Source:HGNC Symbol;Acc:HGNC:10645]         |
| XCL2   | X-C motif chemokine ligand 2 [Source:HGNC Symbol;Acc:HGNC:10646]         |
| IL27   | interleukin 27 [Source:HGNC Symbol;Acc:HGNC:19157]                       |
| EBI3   | Epstein-Barr virus induced 3 [Source:HGNC Symbol;Acc:HGNC:3129]          |
| IL31   | interleukin 31 [Source:HGNC Symbol;Acc:HGNC:19372]                       |
| CLCF1  | cardiotrophin-like cytokine factor 1 [Source:HGNC Symbol;Acc:HGNC:17412] |
| IL26   | interleukin 26 [Source:HGNC Symbol;Acc:HGNC:17119]                       |
| IL1RN  | interleukin 1 receptor antagonist [Source:HGNC Symbol;Acc:HGNC:6000]     |
| IL36RN | interleukin 36 receptor antagonist [Source:HGNC Symbol;Acc:HGNC:15561]   |
| IL36A  | interleukin 36, alpha [Source:HGNC Symbol;Acc:HGNC:15562]                |
| IL36B  | interleukin 36, beta [Source:HGNC Symbol;Acc:HGNC:15564]                 |

|         |                                                                                     |
|---------|-------------------------------------------------------------------------------------|
| IL36G   | interleukin 36, gamma [Source:HGNC Symbol;Acc:HGNC:15741]                           |
| IL1F10  | interleukin 1 family member 10 (theta) [Source:HGNC Symbol;Acc:HGNC:15552]          |
| IL37    | interleukin 37 [Source:HGNC Symbol;Acc:HGNC:15563]                                  |
| IL33    | interleukin 33 [Source:HGNC Symbol;Acc:HGNC:16028]                                  |
| IL17F   | interleukin 17F [Source:HGNC Symbol;Acc:HGNC:16404]                                 |
| IL17B   | interleukin 17B [Source:HGNC Symbol;Acc:HGNC:5982]                                  |
| IL17C   | interleukin 17C [Source:HGNC Symbol;Acc:HGNC:5983]                                  |
| IL25    | interleukin 25 [Source:HGNC Symbol;Acc:HGNC:13765]                                  |
| IL16    | interleukin 16 [Source:HGNC Symbol;Acc:HGNC:5980]                                   |
| IL32    | interleukin 32 [Source:HGNC Symbol;Acc:HGNC:16830]                                  |
| IL34    | interleukin 34 [Source:HGNC Symbol;Acc:HGNC:28529]                                  |
| TNFSF15 | tumor necrosis factor superfamily member 15 [Source:HGNC Symbol;Acc:HGNC:11931]     |
| TNFSF12 | tumor necrosis factor superfamily member 12 [Source:HGNC Symbol;Acc:HGNC:11927]     |
| CD70    | CD70 molecule [Source:HGNC Symbol;Acc:HGNC:11937]                                   |
| TNFSF8  | tumor necrosis factor superfamily member 8 [Source:HGNC Symbol;Acc:HGNC:11938]      |
| TNFSF9  | tumor necrosis factor superfamily member 9 [Source:HGNC Symbol;Acc:HGNC:11939]      |
| TNFSF18 | tumor necrosis factor superfamily member 18 [Source:HGNC Symbol;Acc:HGNC:11932]     |
| TNFSF13 | tumor necrosis factor superfamily member 13 [Source:HGNC Symbol;Acc:HGNC:11928]     |
| GDF15   | growth differentiation factor 15 [Source:HGNC Symbol;Acc:HGNC:30142]                |
| INHBA   | inhibin alpha subunit [Source:HGNC Symbol;Acc:HGNC:6065]                            |
| GDF10   | growth differentiation factor 10 [Source:HGNC Symbol;Acc:HGNC:4215]                 |
| GDF11   | growth differentiation factor 11 [Source:HGNC Symbol;Acc:HGNC:4216]                 |
| MSTN    | myostatin [Source:HGNC Symbol;Acc:HGNC:4223]                                        |
| GDF1    | growth differentiation factor 1 [Source:HGNC Symbol;Acc:HGNC:4214]                  |
| GDF3    | growth differentiation factor 3 [Source:HGNC Symbol;Acc:HGNC:4218]                  |
| GDF9    | growth differentiation factor 9 [Source:HGNC Symbol;Acc:HGNC:4224]                  |
| CCR8    | C-C motif chemokine receptor 8 [Source:HGNC Symbol;Acc:HGNC:1609]                   |
| CCR9    | C-C motif chemokine receptor 9 [Source:HGNC Symbol;Acc:HGNC:1610]                   |
| ACKR4   | atypical chemokine receptor 4 [Source:HGNC Symbol;Acc:HGNC:1611]                    |
| CCR7    | C-C motif chemokine receptor 7 [Source:HGNC Symbol;Acc:HGNC:1608]                   |
| CCR4    | C-C motif chemokine receptor 4 [Source:HGNC Symbol;Acc:HGNC:1605]                   |
| CCR5    | C-C motif chemokine receptor 5 (gene/pseudogene) [Source:HGNC Symbol;Acc:HGNC:1606] |
| CCR3    | C-C motif chemokine receptor 3 [Source:HGNC Symbol;Acc:HGNC:1604]                   |
| CCR2    | C-C motif chemokine receptor 2 [Source:HGNC Symbol;Acc:HGNC:1603]                   |
| CCR1    | C-C motif chemokine receptor 1 [Source:HGNC Symbol;Acc:HGNC:1602]                   |
| CCR10   | C-C motif chemokine receptor 10 [Source:HGNC Symbol;Acc:HGNC:4474]                  |
| CCR6    | C-C motif chemokine receptor 6 [Source:HGNC Symbol;Acc:HGNC:1607]                   |
| CXCR1   | C-X-C motif chemokine receptor 1 [Source:HGNC Symbol;Acc:HGNC:6026]                 |
| CXCR2   | C-X-C motif chemokine receptor 2 [Source:HGNC Symbol;Acc:HGNC:6027]                 |
| CXCR3   | C-X-C motif chemokine receptor 3 [Source:HGNC Symbol;Acc:HGNC:4540]                 |
| CXCR5   | C-X-C motif chemokine receptor 5 [Source:HGNC Symbol;Acc:HGNC:1060]                 |

|           |                                                                                           |
|-----------|-------------------------------------------------------------------------------------------|
| ACKR3     | atypical chemokine receptor 3 [Source:HGNC Symbol;Acc:HGNC:23692]                         |
| CXCR6     | C-X-C motif chemokine receptor 6 [Source:HGNC Symbol;Acc:HGNC:16647]                      |
| XCR1      | X-C motif chemokine receptor 1 [Source:HGNC Symbol;Acc:HGNC:1625]                         |
| CX3CR1    | C-X3-C motif chemokine receptor 1 [Source:HGNC Symbol;Acc:HGNC:2558]                      |
| IL31RA    | interleukin 31 receptor A [Source:HGNC Symbol;Acc:HGNC:18969]                             |
| IL1R2     | interleukin 1 receptor type 2 [Source:HGNC Symbol;Acc:HGNC:5994]                          |
| IL1RL2    | interleukin 1 receptor like 2 [Source:HGNC Symbol;Acc:HGNC:5999]                          |
| IL18RAP   | interleukin 18 receptor accessory protein [Source:HGNC Symbol;Acc:HGNC:5989]              |
| IL1RL1    | interleukin 1 receptor like 1 [Source:HGNC Symbol;Acc:HGNC:5998]                          |
| IL17RA    | interleukin 17 receptor A [Source:HGNC Symbol;Acc:HGNC:5985]                              |
| IL17RC    | interleukin 17 receptor C [Source:HGNC Symbol;Acc:HGNC:18358]                             |
| IL17RB    | interleukin 17 receptor B [Source:HGNC Symbol;Acc:HGNC:18015]                             |
| IL17RE    | interleukin 17 receptor E [Source:HGNC Symbol;Acc:HGNC:18439]                             |
| TNFRSF14  | tumor necrosis factor receptor superfamily member 14 [Source:HGNC Symbol;Acc:HGNC:11912]  |
| TNFRSF6B  | tumor necrosis factor receptor superfamily member 6b [Source:HGNC Symbol;Acc:HGNC:11921]  |
| TNFRSF25  | tumor necrosis factor receptor superfamily member 25 [Source:HGNC Symbol;Acc:HGNC:11910]  |
| TNFRSF10C | tumor necrosis factor receptor superfamily member 10c [Source:HGNC Symbol;Acc:HGNC:11906] |
| TNFRSF10D | tumor necrosis factor receptor superfamily member 10d [Source:HGNC Symbol;Acc:HGNC:11907] |
| TNFRSF21  | tumor necrosis factor receptor superfamily member 21 [Source:HGNC Symbol;Acc:HGNC:13469]  |
| TNFRSF11B | tumor necrosis factor receptor superfamily member 11b [Source:HGNC Symbol;Acc:HGNC:11909] |
| TNFRSF12A | tumor necrosis factor receptor superfamily member 12A [Source:HGNC Symbol;Acc:HGNC:18152] |
| CD27      | CD27 molecule [Source:HGNC Symbol;Acc:HGNC:11922]                                         |
| TNFRSF8   | tumor necrosis factor receptor superfamily member 8 [Source:HGNC Symbol;Acc:HGNC:11923]   |
| TNFRSF9   | tumor necrosis factor receptor superfamily member 9 [Source:HGNC Symbol;Acc:HGNC:11924]   |
| TNFRSF4   | tumor necrosis factor receptor superfamily member 4 [Source:HGNC Symbol;Acc:HGNC:11918]   |
| TNFRSF18  | tumor necrosis factor receptor superfamily member 18 [Source:HGNC Symbol;Acc:HGNC:11914]  |
| TNFRSF17  | tumor necrosis factor receptor superfamily member 17 [Source:HGNC Symbol;Acc:HGNC:11913]  |
| TNFRSF13B | tumor necrosis factor receptor superfamily member 13B [Source:HGNC Symbol;Acc:HGNC:18153] |
| TNFRSF19  | tumor necrosis factor receptor superfamily member 19 [Source:HGNC Symbol;Acc:HGNC:11915]  |
| RELT      | RELT tumor necrosis factor receptor [Source:HGNC Symbol;Acc:HGNC:13764]                   |
| ACVRL1    | activin A receptor like type 1 [Source:HGNC Symbol;Acc:HGNC:175]                          |
| PSMD3     | proteasome 26S subunit, non-ATPase 3 [Source:HGNC Symbol;Acc:HGNC:9560]                   |
| PSMD9     | proteasome 26S subunit, non-ATPase 9 [Source:HGNC Symbol;Acc:HGNC:9567]                   |
| PSMD12    | proteasome 26S subunit, non-ATPase 12 [Source:HGNC Symbol;Acc:HGNC:9557]                  |
| PSMD11    | proteasome 26S subunit, non-ATPase 11 [Source:HGNC Symbol;Acc:HGNC:9556]                  |
| PSMD6     | proteasome 26S subunit, non-ATPase 6 [Source:HGNC Symbol;Acc:HGNC:9564]                   |
| PSMD7     | proteasome 26S subunit, non-ATPase 7 [Source:HGNC Symbol;Acc:HGNC:9565]                   |
| PSMD13    | proteasome 26S subunit, non-ATPase 13 [Source:HGNC Symbol;Acc:HGNC:9558]                  |



|        |                                                                                               |
|--------|-----------------------------------------------------------------------------------------------|
| PSMD14 | proteasome 26S subunit, non-ATPase 14 [Source:HGNC Symbol;Acc:HGNC:16889]                     |
| PSMD8  | proteasome 26S subunit, non-ATPase 8 [Source:HGNC Symbol;Acc:HGNC:9566]                       |
| SHFM1  | split hand/foot malformation (ectrodactyly) type 1 [Source:HGNC Symbol;Acc:HGNC:10845]        |
| PSMD2  | proteasome 26S subunit, non-ATPase 2 [Source:HGNC Symbol;Acc:HGNC:9559]                       |
| PSMD1  | proteasome 26S subunit, non-ATPase 1 [Source:HGNC Symbol;Acc:HGNC:9554]                       |
| ADRM1  | adhesion regulating molecule 1 [Source:HGNC Symbol;Acc:HGNC:15759]                            |
| PSMC2  | proteasome 26S subunit, ATPase 2 [Source:HGNC Symbol;Acc:HGNC:9548]                           |
| PSMC1  | proteasome 26S subunit, ATPase 1 [Source:HGNC Symbol;Acc:HGNC:9547]                           |
| PSMC5  | proteasome 26S subunit, ATPase 5 [Source:HGNC Symbol;Acc:HGNC:9552]                           |
| PSMC6  | proteasome 26S subunit, ATPase 6 [Source:HGNC Symbol;Acc:HGNC:9553]                           |
| PSMC3  | proteasome 26S subunit, ATPase 3 [Source:HGNC Symbol;Acc:HGNC:9549]                           |
| PSMC4  | proteasome 26S subunit, ATPase 4 [Source:HGNC Symbol;Acc:HGNC:9551]                           |
| PSME1  | proteasome activator subunit 1 [Source:HGNC Symbol;Acc:HGNC:9568]                             |
| PSME2  | proteasome activator subunit 2 [Source:HGNC Symbol;Acc:HGNC:9569]                             |
| PSME3  | proteasome activator subunit 3 [Source:HGNC Symbol;Acc:HGNC:9570]                             |
| PSME4  | proteasome activator subunit 4 [Source:HGNC Symbol;Acc:HGNC:20635]                            |
| PSMA6  | proteasome subunit alpha 6 [Source:HGNC Symbol;Acc:HGNC:9535]                                 |
| PSMA2  | proteasome subunit alpha 2 [Source:HGNC Symbol;Acc:HGNC:9531]                                 |
| PSMA4  | proteasome subunit alpha 4 [Source:HGNC Symbol;Acc:HGNC:9533]                                 |
| PSMA7  | proteasome subunit alpha 7 [Source:HGNC Symbol;Acc:HGNC:9536]                                 |
| PSMA8  | proteasome subunit alpha 8 [Source:HGNC Symbol;Acc:HGNC:22985]                                |
| PSMA5  | proteasome subunit alpha 5 [Source:HGNC Symbol;Acc:HGNC:9534]                                 |
| PSMA1  | proteasome subunit alpha 1 [Source:HGNC Symbol;Acc:HGNC:9530]                                 |
| PSMA3  | proteasome subunit alpha 3 [Source:HGNC Symbol;Acc:HGNC:9532]                                 |
| PSMB6  | proteasome subunit beta 6 [Source:HGNC Symbol;Acc:HGNC:9543]                                  |
| PSMB7  | proteasome subunit beta 7 [Source:HGNC Symbol;Acc:HGNC:9544]                                  |
| PSMB3  | proteasome subunit beta 3 [Source:HGNC Symbol;Acc:HGNC:9540]                                  |
| PSMB2  | proteasome subunit beta 2 [Source:HGNC Symbol;Acc:HGNC:9539]                                  |
| PSMB5  | proteasome subunit beta 5 [Source:HGNC Symbol;Acc:HGNC:9542]                                  |
| PSMB1  | proteasome subunit beta 1 [Source:HGNC Symbol;Acc:HGNC:9537]                                  |
| PSMB4  | proteasome subunit beta 4 [Source:HGNC Symbol;Acc:HGNC:9541]                                  |
| PSMB9  | proteasome subunit beta 9 [Source:HGNC Symbol;Acc:HGNC:9546]                                  |
| PSMB10 | proteasome subunit beta 10 [Source:HGNC Symbol;Acc:HGNC:9538]                                 |
| PSMB8  | proteasome subunit beta 8 [Source:HGNC Symbol;Acc:HGNC:9545]                                  |
| PSMB11 | proteasome subunit beta 11 [Source:HGNC Symbol;Acc:HGNC:31963]                                |
| PSMF1  | proteasome inhibitor subunit 1 [Source:HGNC Symbol;Acc:HGNC:9571]                             |
| POMP   | proteasome maturation protein [Source:HGNC Symbol;Acc:HGNC:20330]                             |
| CD79A  | CD79a molecule [Source:HGNC Symbol;Acc:HGNC:1698]                                             |
| CD79B  | CD79b molecule [Source:HGNC Symbol;Acc:HGNC:1699]                                             |
| DAPP1  | dual adaptor of phosphotyrosine and 3-phosphoinositides 1 [Source:HGNC Symbol;Acc:HGNC:16500] |
| IFITM1 | interferon induced transmembrane protein 1 [Source:HGNC Symbol;Acc:HGNC:5412]                 |

|          |                                                                                               |
|----------|-----------------------------------------------------------------------------------------------|
| CD81     | CD81 molecule [Source:HGNC Symbol;Acc:HGNC:1701]                                              |
| CR2      | complement component 3d receptor 2 [Source:HGNC Symbol;Acc:HGNC:2336]                         |
| FCGR2B   | Fc fragment of IgG receptor IIb [Source:HGNC Symbol;Acc:HGNC:3618]                            |
| LILRB2   | leukocyte immunoglobulin like receptor B2 [Source:HGNC Symbol;Acc:HGNC:6606]                  |
| LILRB1   | leukocyte immunoglobulin like receptor B1 [Source:HGNC Symbol;Acc:HGNC:6605]                  |
| LILRB5   | leukocyte immunoglobulin like receptor B5 [Source:HGNC Symbol;Acc:HGNC:6609]                  |
| LILRB4   | leukocyte immunoglobulin like receptor B4 [Source:HGNC Symbol;Acc:HGNC:6608]                  |
| LILRA1   | leukocyte immunoglobulin like receptor A1 [Source:HGNC Symbol;Acc:HGNC:6602]                  |
| LILRB3   | leukocyte immunoglobulin like receptor B3 [Source:HGNC Symbol;Acc:HGNC:6607]                  |
| LILRA3   | leukocyte immunoglobulin like receptor A3 [Source:HGNC Symbol;Acc:HGNC:6604]                  |
| LILRA2   | leukocyte immunoglobulin like receptor A2 [Source:HGNC Symbol;Acc:HGNC:6603]                  |
| LILRA4   | leukocyte immunoglobulin like receptor A4 [Source:HGNC Symbol;Acc:HGNC:15503]                 |
| LILRA6   | leukocyte immunoglobulin like receptor A6 [Source:HGNC Symbol;Acc:HGNC:15495]                 |
| LILRA5   | leukocyte immunoglobulin like receptor A5 [Source:HGNC Symbol;Acc:HGNC:16309]                 |
| CD72     | CD72 molecule [Source:HGNC Symbol;Acc:HGNC:1696]                                              |
| F3       | coagulation factor III, tissue factor [Source:HGNC Symbol;Acc:HGNC:3541]                      |
| F7       | coagulation factor VII [Source:HGNC Symbol;Acc:HGNC:3544]                                     |
| F10      | coagulation factor X [Source:HGNC Symbol;Acc:HGNC:3528]                                       |
| F5       | coagulation factor V [Source:HGNC Symbol;Acc:HGNC:3542]                                       |
| F12      | coagulation factor XII [Source:HGNC Symbol;Acc:HGNC:3530]                                     |
| F11      | coagulation factor XI [Source:HGNC Symbol;Acc:HGNC:3529]                                      |
| F9       | coagulation factor IX [Source:HGNC Symbol;Acc:HGNC:3551]                                      |
| F8       | coagulation factor VIII [Source:HGNC Symbol;Acc:HGNC:3546]                                    |
| THBD     | thrombomodulin [Source:HGNC Symbol;Acc:HGNC:11784]                                            |
| PROCR    | protein C receptor [Source:HGNC Symbol;Acc:HGNC:9452]                                         |
| PROC     | protein C, inactivator of coagulation factors Va and VIIIa [Source:HGNC Symbol;Acc:HGNC:9451] |
| F2RL2    | coagulation factor II thrombin receptor like 2 [Source:HGNC Symbol;Acc:HGNC:3539]             |
| F13A1    | coagulation factor XIII A chain [Source:HGNC Symbol;Acc:HGNC:3531]                            |
| F13B     | coagulation factor XIII B chain [Source:HGNC Symbol;Acc:HGNC:3534]                            |
| CPB2     | carboxypeptidase B2 [Source:HGNC Symbol;Acc:HGNC:2300]                                        |
| FGA      | fibrinogen alpha chain [Source:HGNC Symbol;Acc:HGNC:3661]                                     |
| FGB      | fibrinogen beta chain [Source:HGNC Symbol;Acc:HGNC:3662]                                      |
| FGG      | fibrinogen gamma chain [Source:HGNC Symbol;Acc:HGNC:3694]                                     |
| KLKB1    | kallikrein B1 [Source:HGNC Symbol;Acc:HGNC:6371]                                              |
| PLG      | plasminogen [Source:HGNC Symbol;Acc:HGNC:9071]                                                |
| TFPI     | tissue factor pathway inhibitor [Source:HGNC Symbol;Acc:HGNC:11760]                           |
| SERPINC1 | serpin family C member 1 [Source:HGNC Symbol;Acc:HGNC:775]                                    |
| SERPIND1 | serpin family D member 1 [Source:HGNC Symbol;Acc:HGNC:4838]                                   |
| SERPINA5 | serpin family A member 5 [Source:HGNC Symbol;Acc:HGNC:8723]                                   |
| PROS1    | protein S (alpha) [Source:HGNC Symbol;Acc:HGNC:9456]                                          |
| SERPINB2 | serpin family B member 2 [Source:HGNC Symbol;Acc:HGNC:8584]                                   |

|          |                                                                                              |
|----------|----------------------------------------------------------------------------------------------|
| PLAUR    | plasminogen activator, urokinase receptor [Source:HGNC Symbol;Acc:HGNC:9053]                 |
| SERPINF2 | serpin family F member 2 [Source:HGNC Symbol;Acc:HGNC:9075]                                  |
| CFB      | complement factor B [Source:HGNC Symbol;Acc:HGNC:1037]                                       |
| CFD      | complement factor D [Source:HGNC Symbol;Acc:HGNC:2771]                                       |
| C3       | complement component 3 [Source:HGNC Symbol;Acc:HGNC:1318]                                    |
| C5       | complement component 5 [Source:HGNC Symbol;Acc:HGNC:1331]                                    |
| C6       | complement component 6 [Source:HGNC Symbol;Acc:HGNC:1339]                                    |
| C7       | complement component 7 [Source:HGNC Symbol;Acc:HGNC:1346]                                    |
| C8A      | complement component 8 alpha subunit [Source:HGNC Symbol;Acc:HGNC:1352]                      |
| C8B      | complement component 8, beta polypeptide [Source:HGNC Symbol;Acc:HGNC:1353]                  |
| C8G      | complement component 8, gamma polypeptide [Source:HGNC Symbol;Acc:HGNC:1354]                 |
| C9       | complement component 9 [Source:HGNC Symbol;Acc:HGNC:1358]                                    |
| C1QA     | complement component 1, q subcomponent, A chain [Source:HGNC Symbol;Acc:HGNC:1241]           |
| C1QB     | complement component 1, q subcomponent, B chain [Source:HGNC Symbol;Acc:HGNC:1242]           |
| C1QC     | complement component 1, q subcomponent, C chain [Source:HGNC Symbol;Acc:HGNC:1245]           |
| C1R      | complement C1r subcomponent [Source:HGNC Symbol;Acc:HGNC:1246]                               |
| C1S      | complement component 1, s subcomponent [Source:HGNC Symbol;Acc:HGNC:1247]                    |
| MBL2     | mannose binding lectin 2 [Source:HGNC Symbol;Acc:HGNC:6922]                                  |
| MASP1    | mannan binding lectin serine peptidase 1 [Source:HGNC Symbol;Acc:HGNC:6901]                  |
| MASP2    | mannan binding lectin serine peptidase 2 [Source:HGNC Symbol;Acc:HGNC:6902]                  |
| C2       | complement component 2 [Source:HGNC Symbol;Acc:HGNC:1248]                                    |
| C4A      | complement component 4A (Rodgers blood group) [Source:HGNC Symbol;Acc:HGNC:1323]             |
| C4B      | complement component 4B (Chido blood group) [Source:HGNC Symbol;Acc:HGNC:1324]               |
| C3AR1    | complement component 3a receptor 1 [Source:HGNC Symbol;Acc:HGNC:1319]                        |
| VSIG4    | V-set and immunoglobulin domain containing 4 [Source:HGNC Symbol;Acc:HGNC:17032]             |
| CR1      | complement component 3b/4b receptor 1 (Knops blood group) [Source:HGNC Symbol;Acc:HGNC:2334] |
| CR1L     | complement component 3b/4b receptor 1-like [Source:HGNC Symbol;Acc:HGNC:2335]                |
| C5AR1    | complement component 5a receptor 1 [Source:HGNC Symbol;Acc:HGNC:1338]                        |
| CFH      | complement factor H [Source:HGNC Symbol;Acc:HGNC:4883]                                       |
| CFI      | complement factor I [Source:HGNC Symbol;Acc:HGNC:5394]                                       |
| SERPING1 | serpin family G member 1 [Source:HGNC Symbol;Acc:HGNC:1228]                                  |
| CD55     | CD55 molecule (Cromer blood group) [Source:HGNC Symbol;Acc:HGNC:2665]                        |
| CD46     | CD46 molecule [Source:HGNC Symbol;Acc:HGNC:6953]                                             |
| C4BPA    | complement component 4 binding protein alpha [Source:HGNC Symbol;Acc:HGNC:1325]              |
| C4BPB    | complement component 4 binding protein beta [Source:HGNC Symbol;Acc:HGNC:1328]               |
| CFHR3    | complement factor H related 3 [Source:HGNC Symbol;Acc:HGNC:16980]                            |
| CFHR1    | complement factor H related 1 [Source:HGNC Symbol;Acc:HGNC:4888]                             |
| CFHR2    | complement factor H related 2 [Source:HGNC Symbol;Acc:HGNC:4890]                             |
| CFHR4    | complement factor H related 4 [Source:HGNC Symbol;Acc:HGNC:16979]                            |
| CFHR5    | complement factor H related 5 [Source:HGNC Symbol;Acc:HGNC:24668]                            |
| CD59     | CD59 molecule [Source:HGNC Symbol;Acc:HGNC:1689]                                             |

|         |                                                                                                   |
|---------|---------------------------------------------------------------------------------------------------|
| CLU     | clusterin [Source:HGNC Symbol;Acc:HGNC:2095]                                                      |
| TLR1    | toll like receptor 1 [Source:HGNC Symbol;Acc:HGNC:11847]                                          |
| TLR3    | toll like receptor 3 [Source:HGNC Symbol;Acc:HGNC:11849]                                          |
| TLR5    | toll like receptor 5 [Source:HGNC Symbol;Acc:HGNC:11851]                                          |
| TLR7    | toll like receptor 7 [Source:HGNC Symbol;Acc:HGNC:15631]                                          |
| TLR8    | toll like receptor 8 [Source:HGNC Symbol;Acc:HGNC:15632]                                          |
| TLR9    | toll like receptor 9 [Source:HGNC Symbol;Acc:HGNC:15633]                                          |
| IRF5    | interferon regulatory factor 5 [Source:HGNC Symbol;Acc:HGNC:6120]                                 |
| IFIH1   | interferon induced with helicase C domain 1 [Source:HGNC Symbol;Acc:HGNC:18873]                   |
| DHX58   | DEXH-box helicase 58 [Source:HGNC Symbol;Acc:HGNC:29517]                                          |
| AZI2    | 5-azacytidine induced 2 [Source:HGNC Symbol;Acc:HGNC:24002]                                       |
| TBKBP1  | TBK1 binding protein 1 [Source:HGNC Symbol;Acc:HGNC:30140]                                        |
| RNF125  | ring finger protein 125 [Source:HGNC Symbol;Acc:HGNC:21150]                                       |
| ISG15   | ISG15 ubiquitin-like modifier [Source:HGNC Symbol;Acc:HGNC:4053]                                  |
| NLRX1   | NLR family member X1 [Source:HGNC Symbol;Acc:HGNC:29890]                                          |
| OTUD5   | OTU deubiquitinase 5 [Source:HGNC Symbol;Acc:HGNC:25402]                                          |
| SIKE1   | suppressor of IKBKE 1 [Source:HGNC Symbol;Acc:HGNC:26119]                                         |
| DDX3X   | DEAD-box helicase 3, X-linked [Source:HGNC Symbol;Acc:HGNC:2745]                                  |
| PIN1    | peptidylprolyl cis/trans isomerase, NIMA-interacting 1 [Source:HGNC Symbol;Acc:HGNC:8988]         |
| TKFC    | triokinase and FMN cyclase [Source:HGNC Symbol;Acc:HGNC:24552]                                    |
| PPP1R3A | protein phosphatase 1 regulatory subunit 3A [Source:HGNC Symbol;Acc:HGNC:9291]                    |
| PPP1R3C | protein phosphatase 1 regulatory subunit 3C [Source:HGNC Symbol;Acc:HGNC:9293]                    |
| PPP1R3D | protein phosphatase 1 regulatory subunit 3D [Source:HGNC Symbol;Acc:HGNC:9294]                    |
| PPP1R3B | protein phosphatase 1 regulatory subunit 3B [Source:HGNC Symbol;Acc:HGNC:14942]                   |
| PPP1R3E | protein phosphatase 1 regulatory subunit 3E [Source:HGNC Symbol;Acc:HGNC:14943]                   |
| PPP1R3F | protein phosphatase 1 regulatory subunit 3F [Source:HGNC Symbol;Acc:HGNC:14944]                   |
| PRKAR1A | protein kinase cAMP-dependent type I regulatory subunit alpha [Source:HGNC Symbol;Acc:HGNC:9388]  |
| PRKAR2A | protein kinase cAMP-dependent type II regulatory subunit alpha [Source:HGNC Symbol;Acc:HGNC:9391] |
| PRKAR2B | protein kinase cAMP-dependent type II regulatory subunit beta [Source:HGNC Symbol;Acc:HGNC:9392]  |
| PRKAR1B | protein kinase cAMP-dependent type I regulatory subunit beta [Source:HGNC Symbol;Acc:HGNC:9390]   |
| FLOT2   | flotillin 2 [Source:HGNC Symbol;Acc:HGNC:3758]                                                    |
| FLOT1   | flotillin 1 [Source:HGNC Symbol;Acc:HGNC:3757]                                                    |
| SH2B2   | SH2B adaptor protein 2 [Source:HGNC Symbol;Acc:HGNC:17381]                                        |
| RHOQ    | ras homolog family member Q [Source:HGNC Symbol;Acc:HGNC:17736]                                   |
| EXOC7   | exocyst complex component 7 [Source:HGNC Symbol;Acc:HGNC:23214]                                   |
| TRIP10  | thyroid hormone receptor interactor 10 [Source:HGNC Symbol;Acc:HGNC:12304]                        |
| CTSA    | cathepsin A [Source:HGNC Symbol;Acc:HGNC:9251]                                                    |
| CTSE    | cathepsin E [Source:HGNC Symbol;Acc:HGNC:2530]                                                    |
| CTSG    | cathepsin G [Source:HGNC Symbol;Acc:HGNC:2532]                                                    |

|         |                                                                                        |
|---------|----------------------------------------------------------------------------------------|
| NAPSA   | napsin A aspartic peptidase [Source:HGNC Symbol;Acc:HGNC:13395]                        |
| LGMN    | legumain [Source:HGNC Symbol;Acc:HGNC:9472]                                            |
| TPP1    | tripeptidyl peptidase 1 [Source:HGNC Symbol;Acc:HGNC:2073]                             |
| GLA     | galactosidase alpha [Source:HGNC Symbol;Acc:HGNC:4296]                                 |
| GLB1    | galactosidase beta 1 [Source:HGNC Symbol;Acc:HGNC:4298]                                |
| IDUA    | iduronidase, alpha-L- [Source:HGNC Symbol;Acc:HGNC:5391]                               |
| NAGA    | alpha-N-acetylgalactosaminidase [Source:HGNC Symbol;Acc:HGNC:7631]                     |
| NAGLU   | N-acetyl-alpha-glucosaminidase [Source:HGNC Symbol;Acc:HGNC:7632]                      |
| GALC    | galactosylceramidase [Source:HGNC Symbol;Acc:HGNC:4115]                                |
| GUSB    | glucuronidase beta [Source:HGNC Symbol;Acc:HGNC:4696]                                  |
| FUCA1   | fucosidase, alpha-L- 1, tissue [Source:HGNC Symbol;Acc:HGNC:4006]                      |
| FUCA2   | fucosidase, alpha-L- 2, plasma [Source:HGNC Symbol;Acc:HGNC:4008]                      |
| HEXA    | hexosaminidase subunit alpha [Source:HGNC Symbol;Acc:HGNC:4878]                        |
| HEXB    | hexosaminidase subunit beta [Source:HGNC Symbol;Acc:HGNC:4879]                         |
| MANBA   | mannosidase beta [Source:HGNC Symbol;Acc:HGNC:6831]                                    |
| MAN2B1  | mannosidase alpha class 2B member 1 [Source:HGNC Symbol;Acc:HGNC:6826]                 |
| NEU1    | neuraminidase 1 (lysosomal sialidase) [Source:HGNC Symbol;Acc:HGNC:7758]               |
| HYAL2   | hyaluronoglucosaminidase 2 [Source:HGNC Symbol;Acc:HGNC:5321]                          |
| HYAL1   | hyaluronoglucosaminidase 1 [Source:HGNC Symbol;Acc:HGNC:5320]                          |
| SPAM1   | sperm adhesion molecule 1 [Source:HGNC Symbol;Acc:HGNC:11217]                          |
| HYAL4   | hyaluronoglucosaminidase 4 [Source:HGNC Symbol;Acc:HGNC:5323]                          |
| HYAL3   | hyaluronoglucosaminidase 3 [Source:HGNC Symbol;Acc:HGNC:5322]                          |
| ARSA    | arylsulfatase A [Source:HGNC Symbol;Acc:HGNC:713]                                      |
| ARSB    | arylsulfatase B [Source:HGNC Symbol;Acc:HGNC:714]                                      |
| ARSG    | arylsulfatase G [Source:HGNC Symbol;Acc:HGNC:24102]                                    |
| GALNS   | galactosamine (N-acetyl)-6-sulfatase [Source:HGNC Symbol;Acc:HGNC:4122]                |
| GNS     | glucosamine (N-acetyl)-6-sulfatase [Source:HGNC Symbol;Acc:HGNC:4422]                  |
| IDS     | iduronate 2-sulfatase [Source:HGNC Symbol;Acc:HGNC:5389]                               |
| SGSH    | N-sulfoglucosamine sulfohydrolase [Source:HGNC Symbol;Acc:HGNC:10818]                  |
| PLA2G15 | phospholipase A2 group XV [Source:HGNC Symbol;Acc:HGNC:17163]                          |
| DNASE2  | deoxyribonuclease II, lysosomal [Source:HGNC Symbol;Acc:HGNC:2960]                     |
| DNASE2B | deoxyribonuclease II beta [Source:HGNC Symbol;Acc:HGNC:28875]                          |
| ACP2    | acid phosphatase 2, lysosomal [Source:HGNC Symbol;Acc:HGNC:123]                        |
| ACP5    | acid phosphatase 5, tartrate resistant [Source:HGNC Symbol;Acc:HGNC:124]               |
| SMPD1   | sphingomyelin phosphodiesterase 1 [Source:HGNC Symbol;Acc:HGNC:11120]                  |
| ASAH1   | N-acylsphingosine amidohydrolase (acid ceramidase) 1 [Source:HGNC Symbol;Acc:HGNC:735] |
| AGA     | aspartylglucosaminidase [Source:HGNC Symbol;Acc:HGNC:318]                              |
| PSAP    | prosaposin [Source:HGNC Symbol;Acc:HGNC:9498]                                          |
| PSAPL1  | prosaposin-like 1 (gene/pseudogene) [Source:HGNC Symbol;Acc:HGNC:33131]                |
| GM2A    | GM2 ganglioside activator [Source:HGNC Symbol;Acc:HGNC:4367]                           |
| PPT2    | palmitoyl-protein thioesterase 2 [Source:HGNC Symbol;Acc:HGNC:9326]                    |

|         |                                                                                                         |
|---------|---------------------------------------------------------------------------------------------------------|
| CD68    | CD68 molecule [Source:HGNC Symbol;Acc:HGNC:1693]                                                        |
| CD63    | CD63 molecule [Source:HGNC Symbol;Acc:HGNC:1692]                                                        |
| SCARB2  | scavenger receptor class B member 2 [Source:HGNC Symbol;Acc:HGNC:1665]                                  |
| CTNS    | cystinosis, lysosomal cystine transporter [Source:HGNC Symbol;Acc:HGNC:2518]                            |
| SLC17A5 | solute carrier family 17 member 5 [Source:HGNC Symbol;Acc:HGNC:10933]                                   |
| SLC11A1 | solute carrier family 11 member 1 [Source:HGNC Symbol;Acc:HGNC:10907]                                   |
| SLC11A2 | solute carrier family 11 member 2 [Source:HGNC Symbol;Acc:HGNC:10908]                                   |
| LAPTM4B | lysosomal protein transmembrane 4 beta [Source:HGNC Symbol;Acc:HGNC:13646]                              |
| LAPTM5  | lysosomal protein transmembrane 5 [Source:HGNC Symbol;Acc:HGNC:29612]                                   |
| LAPTM4A | lysosomal protein transmembrane 4 alpha [Source:HGNC Symbol;Acc:HGNC:6924]                              |
| ABCA2   | ATP binding cassette subfamily A member 2 [Source:HGNC Symbol;Acc:HGNC:32]                              |
| ABCB9   | ATP binding cassette subfamily B member 9 [Source:HGNC Symbol;Acc:HGNC:50]                              |
| CD164   | CD164 molecule [Source:HGNC Symbol;Acc:HGNC:1632]                                                       |
| ENTPD4  | ectonucleoside triphosphate diphosphohydrolase 4 [Source:HGNC Symbol;Acc:HGNC:14573]                    |
| CLN3    | ceroid-lipofuscinosis, neuronal 3 [Source:HGNC Symbol;Acc:HGNC:2074]                                    |
| CLN5    | ceroid-lipofuscinosis, neuronal 5 [Source:HGNC Symbol;Acc:HGNC:2076]                                    |
| MFSD8   | major facilitator superfamily domain containing 8 [Source:HGNC Symbol;Acc:HGNC:28486]                   |
| HGSNAT  | heparan-alpha-glucosaminide N-acetyltransferase [Source:HGNC Symbol;Acc:HGNC:26527]                     |
| SUMF1   | sulfatase modifying factor 1 [Source:HGNC Symbol;Acc:HGNC:20376]                                        |
| GNPTAB  | N-acetylglucosamine-1-phosphate transferase alpha and beta subunits [Source:HGNC Symbol;Acc:HGNC:29670] |
| GNPTG   | N-acetylglucosamine-1-phosphate transferase gamma subunit [Source:HGNC Symbol;Acc:HGNC:23026]           |
| NAGPA   | N-acetylglucosamine-1-phosphodiester alpha-N-acetylglucosaminidase [Source:HGNC Symbol;Acc:HGNC:17378]  |
| IGF2R   | insulin like growth factor 2 receptor [Source:HGNC Symbol;Acc:HGNC:5467]                                |
| M6PR    | mannose-6-phosphate receptor, cation dependent [Source:HGNC Symbol;Acc:HGNC:6752]                       |
| CLTA    | clathrin light chain A [Source:HGNC Symbol;Acc:HGNC:2090]                                               |
| CLTB    | clathrin light chain B [Source:HGNC Symbol;Acc:HGNC:2091]                                               |
| CLTC    | clathrin heavy chain [Source:HGNC Symbol;Acc:HGNC:2092]                                                 |
| CLTCL1  | clathrin heavy chain like 1 [Source:HGNC Symbol;Acc:HGNC:2093]                                          |
| AP1G1   | adaptor related protein complex 1 gamma 1 subunit [Source:HGNC Symbol;Acc:HGNC:555]                     |
| AP1G2   | adaptor related protein complex 1 gamma 2 subunit [Source:HGNC Symbol;Acc:HGNC:556]                     |
| AP1B1   | adaptor related protein complex 1 beta 1 subunit [Source:HGNC Symbol;Acc:HGNC:554]                      |
| AP1M1   | adaptor related protein complex 1 mu 1 subunit [Source:HGNC Symbol;Acc:HGNC:13667]                      |
| AP1M2   | adaptor related protein complex 1 mu 2 subunit [Source:HGNC Symbol;Acc:HGNC:558]                        |
| AP1S1   | adaptor related protein complex 1 sigma 1 subunit [Source:HGNC Symbol;Acc:HGNC:559]                     |
| AP1S2   | adaptor related protein complex 1 sigma 2 subunit [Source:HGNC Symbol;Acc:HGNC:560]                     |
| AP1S3   | adaptor related protein complex 1 sigma 3 subunit [Source:HGNC Symbol;Acc:HGNC:18971]                   |
| AP3D1   | adaptor related protein complex 3 delta 1 subunit [Source:HGNC Symbol;Acc:HGNC:568]                     |
| AP3B2   | adaptor related protein complex 3 beta 2 subunit [Source:HGNC Symbol;Acc:HGNC:567]                      |
| AP3B1   | adaptor related protein complex 3 beta 1 subunit [Source:HGNC Symbol;Acc:HGNC:566]                      |

|         |                                                                                                           |
|---------|-----------------------------------------------------------------------------------------------------------|
| AP3M1   | adaptor related protein complex 3 mu 1 subunit [Source:HGNC Symbol;Acc:HGNC:569]                          |
| AP3M2   | adaptor related protein complex 3 mu 2 subunit [Source:HGNC Symbol;Acc:HGNC:570]                          |
| AP3S2   | adaptor related protein complex 3 sigma 2 subunit [Source:HGNC Symbol;Acc:HGNC:571]                       |
| AP3S1   | adaptor related protein complex 3 sigma 1 subunit [Source:HGNC Symbol;Acc:HGNC:2013]                      |
| AP4E1   | adaptor related protein complex 4 epsilon 1 subunit [Source:HGNC Symbol;Acc:HGNC:573]                     |
| AP4B1   | adaptor related protein complex 4 beta 1 subunit [Source:HGNC Symbol;Acc:HGNC:572]                        |
| AP4M1   | adaptor related protein complex 4 mu 1 subunit [Source:HGNC Symbol;Acc:HGNC:574]                          |
| AP4S1   | adaptor related protein complex 4 sigma 1 subunit [Source:HGNC Symbol;Acc:HGNC:575]                       |
| GGA2    | golgi associated, gamma adaptin ear containing, ARF binding protein 2 [Source:HGNC Symbol;Acc:HGNC:16064] |
| GGA3    | golgi associated, gamma adaptin ear containing, ARF binding protein 3 [Source:HGNC Symbol;Acc:HGNC:17079] |
| GGA1    | golgi associated, gamma adaptin ear containing, ARF binding protein 1 [Source:HGNC Symbol;Acc:HGNC:17842] |
| LITAF   | lipopolysaccharide induced TNF factor [Source:HGNC Symbol;Acc:HGNC:16841]                                 |
| ARF1    | ADP ribosylation factor 1 [Source:HGNC Symbol;Acc:HGNC:652]                                               |
| FCER1A  | Fc fragment of IgE receptor Ia [Source:HGNC Symbol;Acc:HGNC:3609]                                         |
| MS4A2   | membrane spanning 4-domains A2 [Source:HGNC Symbol;Acc:HGNC:7316]                                         |
| FCER1G  | Fc fragment of IgE receptor Ig [Source:HGNC Symbol;Acc:HGNC:3611]                                         |
| AGPAT3  | 1-acylglycerol-3-phosphate O-acyltransferase 3 [Source:HGNC Symbol;Acc:HGNC:326]                          |
| AGPAT4  | 1-acylglycerol-3-phosphate O-acyltransferase 4 [Source:HGNC Symbol;Acc:HGNC:20885]                        |
| AGPAT5  | 1-acylglycerol-3-phosphate O-acyltransferase 5 [Source:HGNC Symbol;Acc:HGNC:20886]                        |
| AVP     | arginine vasopressin [Source:HGNC Symbol;Acc:HGNC:894]                                                    |
| GRM2    | glutamate metabotropic receptor 2 [Source:HGNC Symbol;Acc:HGNC:4594]                                      |
| GRM3    | glutamate metabotropic receptor 3 [Source:HGNC Symbol;Acc:HGNC:4595]                                      |
| GRM4    | glutamate metabotropic receptor 4 [Source:HGNC Symbol;Acc:HGNC:4596]                                      |
| GRM6    | glutamate metabotropic receptor 6 [Source:HGNC Symbol;Acc:HGNC:4598]                                      |
| GRM7    | glutamate metabotropic receptor 7 [Source:HGNC Symbol;Acc:HGNC:4599]                                      |
| GRM8    | glutamate metabotropic receptor 8 [Source:HGNC Symbol;Acc:HGNC:4600]                                      |
| AVPR2   | arginine vasopressin receptor 2 [Source:HGNC Symbol;Acc:HGNC:897]                                         |
| CYTH3   | cytohesin 3 [Source:HGNC Symbol;Acc:HGNC:9504]                                                            |
| CYTH4   | cytohesin 4 [Source:HGNC Symbol;Acc:HGNC:9505]                                                            |
| CYTH2   | cytohesin 2 [Source:HGNC Symbol;Acc:HGNC:9502]                                                            |
| CYTH1   | cytohesin 1 [Source:HGNC Symbol;Acc:HGNC:9501]                                                            |
| DNM1    | dynammin 1 [Source:HGNC Symbol;Acc:HGNC:2972]                                                             |
| DNM3    | dynammin 3 [Source:HGNC Symbol;Acc:HGNC:29125]                                                            |
| DNM2    | dynammin 2 [Source:HGNC Symbol;Acc:HGNC:2974]                                                             |
| KLF4    | Kruppel like factor 4 [Source:HGNC Symbol;Acc:HGNC:6348]                                                  |
| TBX3    | T-box 3 [Source:HGNC Symbol;Acc:HGNC:11602]                                                               |
| NANOG   | Nanog homeobox [Source:HGNC Symbol;Acc:HGNC:20857]                                                        |
| NANOGP8 | Nanog homeobox pseudogene 8 [Source:HGNC Symbol;Acc:HGNC:23106]                                           |
| TCF3    | transcription factor 3 [Source:HGNC Symbol;Acc:HGNC:11633]                                                |

|             |                                                                                                                                                     |
|-------------|-----------------------------------------------------------------------------------------------------------------------------------------------------|
| ESRRB       | estrogen related receptor beta [Source:HGNC Symbol;Acc:HGNC:3473]                                                                                   |
| HESX1       | HESX homeobox 1 [Source:HGNC Symbol;Acc:HGNC:4877]                                                                                                  |
| ZIC3        | Zic family member 3 [Source:HGNC Symbol;Acc:HGNC:12874]                                                                                             |
| SKIL        | SKI-like proto-oncogene [Source:HGNC Symbol;Acc:HGNC:10897]                                                                                         |
| SMARCAD1    | SWI/SNF-related, matrix-associated actin-dependent regulator of chromatin, subfamily a, containing DEAD/H box 1 [Source:HGNC Symbol;Acc:HGNC:18398] |
| KAT6A       | lysine acetyltransferase 6A [Source:HGNC Symbol;Acc:HGNC:13013]                                                                                     |
| SETDB1      | SET domain bifurcated 1 [Source:HGNC Symbol;Acc:HGNC:10761]                                                                                         |
| JARID2      | jumonji and AT-rich interaction domain containing 2 [Source:HGNC Symbol;Acc:HGNC:6196]                                                              |
| REST        | RE1 silencing transcription factor [Source:HGNC Symbol;Acc:HGNC:9966]                                                                               |
| RIF1        | replication timing regulatory factor 1 [Source:HGNC Symbol;Acc:HGNC:23207]                                                                          |
| PCGF1       | polycomb group ring finger 1 [Source:HGNC Symbol;Acc:HGNC:17615]                                                                                    |
| PCGF2       | polycomb group ring finger 2 [Source:HGNC Symbol;Acc:HGNC:12929]                                                                                    |
| PCGF3       | polycomb group ring finger 3 [Source:HGNC Symbol;Acc:HGNC:10066]                                                                                    |
| BMI1        | BMI1 proto-oncogene, polycomb ring finger [Source:HGNC Symbol;Acc:HGNC:1066]                                                                        |
| COMMD3-BMI1 | COMMD3-BMI1 readthrough [Source:HGNC Symbol;Acc:HGNC:48326]                                                                                         |
| PCGF5       | polycomb group ring finger 5 [Source:HGNC Symbol;Acc:HGNC:28264]                                                                                    |
| PCGF6       | polycomb group ring finger 6 [Source:HGNC Symbol;Acc:HGNC:21156]                                                                                    |
| MEIS1       | Meis homeobox 1 [Source:HGNC Symbol;Acc:HGNC:7000]                                                                                                  |
| HOXB1       | homeobox B1 [Source:HGNC Symbol;Acc:HGNC:5111]                                                                                                      |
| HOXA1       | homeobox A1 [Source:HGNC Symbol;Acc:HGNC:5099]                                                                                                      |
| HOXD1       | homeobox D1 [Source:HGNC Symbol;Acc:HGNC:5132]                                                                                                      |
| LHX5        | LIM homeobox 5 [Source:HGNC Symbol;Acc:HGNC:14216]                                                                                                  |
| OTX1        | orthodenticle homeobox 1 [Source:HGNC Symbol;Acc:HGNC:8521]                                                                                         |
| NEUROG1     | neurogenin 1 [Source:HGNC Symbol;Acc:HGNC:7764]                                                                                                     |
| HAND1       | heart and neural crest derivatives expressed 1 [Source:HGNC Symbol;Acc:HGNC:4807]                                                                   |
| DLX5        | distal-less homeobox 5 [Source:HGNC Symbol;Acc:HGNC:2918]                                                                                           |
| MYF5        | myogenic factor 5 [Source:HGNC Symbol;Acc:HGNC:7565]                                                                                                |
| ONECUT1     | one cut homeobox 1 [Source:HGNC Symbol;Acc:HGNC:8138]                                                                                               |
| ISL1        | ISL LIM homeobox 1 [Source:HGNC Symbol;Acc:HGNC:6132]                                                                                               |
| ZFH3        | zinc finger homeobox 3 [Source:HGNC Symbol;Acc:HGNC:777]                                                                                            |
| ESX1        | ESX homeobox 1 [Source:HGNC Symbol;Acc:HGNC:14865]                                                                                                  |
| NPNT        | nephronectin [Source:HGNC Symbol;Acc:HGNC:27405]                                                                                                    |
| FRAS1       | Fraser extracellular matrix complex subunit 1 [Source:HGNC Symbol;Acc:HGNC:19185]                                                                   |
| FREM2       | FRAS1 related extracellular matrix protein 2 [Source:HGNC Symbol;Acc:HGNC:25396]                                                                    |
| FREM1       | FRAS1 related extracellular matrix 1 [Source:HGNC Symbol;Acc:HGNC:23399]                                                                            |
| DSPP        | dentin sialophosphoprotein [Source:HGNC Symbol;Acc:HGNC:3054]                                                                                       |
| DMP1        | dentin matrix acidic phosphoprotein 1 [Source:HGNC Symbol;Acc:HGNC:2932]                                                                            |
| AGRN        | agrin [Source:HGNC Symbol;Acc:HGNC:329]                                                                                                             |
| HSPG2       | heparan sulfate proteoglycan 2 [Source:HGNC Symbol;Acc:HGNC:5273]                                                                                   |
| SV2C        | synaptic vesicle glycoprotein 2C [Source:HGNC Symbol;Acc:HGNC:30670]                                                                                |



|          |                                                                                                                         |
|----------|-------------------------------------------------------------------------------------------------------------------------|
| SV2B     | synaptic vesicle glycoprotein 2B [Source:HGNC Symbol;Acc:HGNC:16874]                                                    |
| SV2A     | synaptic vesicle glycoprotein 2A [Source:HGNC Symbol;Acc:HGNC:20566]                                                    |
| GP5      | glycoprotein V platelet [Source:HGNC Symbol;Acc:HGNC:4443]                                                              |
| GP1BA    | glycoprotein Ib platelet alpha subunit [Source:HGNC Symbol;Acc:HGNC:4439]                                               |
| GP1BB    | glycoprotein Ib platelet beta subunit [Source:HGNC Symbol;Acc:HGNC:4440]                                                |
| GP9      | glycoprotein IX platelet [Source:HGNC Symbol;Acc:HGNC:4444]                                                             |
| GP6      | glycoprotein VI platelet [Source:HGNC Symbol;Acc:HGNC:14388]                                                            |
| DAG1     | dystroglycan 1 [Source:HGNC Symbol;Acc:HGNC:2666]                                                                       |
| CD47     | CD47 molecule [Source:HGNC Symbol;Acc:HGNC:1682]                                                                        |
| HMMR     | hyaluronan mediated motility receptor [Source:HGNC Symbol;Acc:HGNC:5012]                                                |
| EML4     | echinoderm microtubule associated protein like 4 [Source:HGNC Symbol;Acc:HGNC:1316]                                     |
| ALK      | anaplastic lymphoma receptor tyrosine kinase [Source:HGNC Symbol;Acc:HGNC:427]                                          |
| BATF3    | basic leucine zipper ATF-like transcription factor 3 [Source:HGNC Symbol;Acc:HGNC:28915]                                |
| BATF     | basic leucine zipper ATF-like transcription factor [Source:HGNC Symbol;Acc:HGNC:958]                                    |
| BATF2    | basic leucine zipper ATF-like transcription factor 2 [Source:HGNC Symbol;Acc:HGNC:25163]                                |
| DCC      | DCC netrin 1 receptor [Source:HGNC Symbol;Acc:HGNC:2701]                                                                |
| APPL1    | adaptor protein, phosphotyrosine interacting with PH domain and leucine zipper 1<br>[Source:HGNC Symbol;Acc:HGNC:24035] |
| ARHGEF11 | Rho guanine nucleotide exchange factor 11 [Source:HGNC Symbol;Acc:HGNC:14580]                                           |
| PLEKHG5  | pleckstrin homology and RhoGEF domain containing G5 [Source:HGNC<br>Symbol;Acc:HGNC:29105]                              |
| PTGER4   | prostaglandin E receptor 4 [Source:HGNC Symbol;Acc:HGNC:9596]                                                           |
| NKX3-1   | NK3 homeobox 1 [Source:HGNC Symbol;Acc:HGNC:7838]                                                                       |
| TRAF4    | TNF receptor associated factor 4 [Source:HGNC Symbol;Acc:HGNC:12034]                                                    |
| PIM2     | Pim-2 proto-oncogene, serine/threonine kinase [Source:HGNC Symbol;Acc:HGNC:8987]                                        |
| MMP2     | matrix metalloproteinase 2 [Source:HGNC Symbol;Acc:HGNC:7166]                                                           |
| CCDC6    | coiled-coil domain containing 6 [Source:HGNC Symbol;Acc:HGNC:18782]                                                     |
| NCOA4    | nuclear receptor coactivator 4 [Source:HGNC Symbol;Acc:HGNC:7671]                                                       |
| TPM3     | tropomyosin 3 [Source:HGNC Symbol;Acc:HGNC:12012]                                                                       |
| TPR      | translocated promoter region, nuclear basket protein [Source:HGNC Symbol;Acc:HGNC:12017]                                |
| TFG      | TRK-fused gene [Source:HGNC Symbol;Acc:HGNC:11758]                                                                      |
| PAX8     | paired box 8 [Source:HGNC Symbol;Acc:HGNC:8622]                                                                         |
| RARB     | retinoic acid receptor beta [Source:HGNC Symbol;Acc:HGNC:9865]                                                          |
| ESR1     | estrogen receptor 1 [Source:HGNC Symbol;Acc:HGNC:3467]                                                                  |
| ESR2     | estrogen receptor 2 [Source:HGNC Symbol;Acc:HGNC:3468]                                                                  |
| NCOA1    | nuclear receptor coactivator 1 [Source:HGNC Symbol;Acc:HGNC:7668]                                                       |
| NCOA3    | nuclear receptor coactivator 3 [Source:HGNC Symbol;Acc:HGNC:7670]                                                       |
| JUP      | junction plakoglobin [Source:HGNC Symbol;Acc:HGNC:6207]                                                                 |
| ZBTB16   | zinc finger and BTB domain containing 16 [Source:HGNC Symbol;Acc:HGNC:12930]                                            |
| RARA     | retinoic acid receptor alpha [Source:HGNC Symbol;Acc:HGNC:9864]                                                         |
| RUNX1T1  | RUNX1 translocation partner 1 [Source:HGNC Symbol;Acc:HGNC:1535]                                                        |
| SPI1     | Spi-1 proto-oncogene [Source:HGNC Symbol;Acc:HGNC:11241]                                                                |

|        |                                                                                          |
|--------|------------------------------------------------------------------------------------------|
| CEBPA  | CCAAT/enhancer binding protein alpha [Source:HGNC Symbol;Acc:HGNC:1833]                  |
| CKS1B  | CDC28 protein kinase regulatory subunit 1B [Source:HGNC Symbol;Acc:HGNC:19083]           |
| CKS2   | CDC28 protein kinase regulatory subunit 2 [Source:HGNC Symbol;Acc:HGNC:2000]             |
| POLK   | polymerase (DNA) kappa [Source:HGNC Symbol;Acc:HGNC:9183]                                |
| MLH1   | mutL homolog 1 [Source:HGNC Symbol;Acc:HGNC:7127]                                        |
| MSH2   | mutS homolog 2 [Source:HGNC Symbol;Acc:HGNC:7325]                                        |
| MSH3   | mutS homolog 3 [Source:HGNC Symbol;Acc:HGNC:7326]                                        |
| MSH6   | mutS homolog 6 [Source:HGNC Symbol;Acc:HGNC:7329]                                        |
| BRCA2  | BRCA2, DNA repair associated [Source:HGNC Symbol;Acc:HGNC:1101]                          |
| RAD51  | RAD51 recombinase [Source:HGNC Symbol;Acc:HGNC:9817]                                     |
| GSTA5  | glutathione S-transferase alpha 5 [Source:HGNC Symbol;Acc:HGNC:19662]                    |
| GSTA2  | glutathione S-transferase alpha 2 [Source:HGNC Symbol;Acc:HGNC:4627]                     |
| GSTA4  | glutathione S-transferase alpha 4 [Source:HGNC Symbol;Acc:HGNC:4629]                     |
| GSTO2  | glutathione S-transferase omega 2 [Source:HGNC Symbol;Acc:HGNC:23064]                    |
| GSTM4  | glutathione S-transferase mu 4 [Source:HGNC Symbol;Acc:HGNC:4636]                        |
| GSTT2  | glutathione S-transferase theta 2 (gene/pseudogene) [Source:HGNC Symbol;Acc:HGNC:4642]   |
| GSTT1  | glutathione S-transferase theta 1 [Source:HGNC Symbol;Acc:HGNC:4641]                     |
| GSTM3  | glutathione S-transferase mu 3 (brain) [Source:HGNC Symbol;Acc:HGNC:4635]                |
| MGST1  | microsomal glutathione S-transferase 1 [Source:HGNC Symbol;Acc:HGNC:7061]                |
| MGST3  | microsomal glutathione S-transferase 3 [Source:HGNC Symbol;Acc:HGNC:7064]                |
| GSTM1  | glutathione S-transferase mu 1 [Source:HGNC Symbol;Acc:HGNC:4632]                        |
| GSTM5  | glutathione S-transferase mu 5 [Source:HGNC Symbol;Acc:HGNC:4637]                        |
| MGST2  | microsomal glutathione S-transferase 2 [Source:HGNC Symbol;Acc:HGNC:7063]                |
| GSTA1  | glutathione S-transferase alpha 1 [Source:HGNC Symbol;Acc:HGNC:4626]                     |
| GSTM2  | glutathione S-transferase mu 2 (muscle) [Source:HGNC Symbol;Acc:HGNC:4634]               |
| GSTA3  | glutathione S-transferase alpha 3 [Source:HGNC Symbol;Acc:HGNC:4628]                     |
| GSTO1  | glutathione S-transferase omega 1 [Source:HGNC Symbol;Acc:HGNC:13312]                    |
| GSTT2B | glutathione S-transferase theta 2B (gene/pseudogene) [Source:HGNC Symbol;Acc:HGNC:33437] |
| GSTP1  | glutathione S-transferase pi 1 [Source:HGNC Symbol;Acc:HGNC:4638]                        |
| TXNRD1 | thioredoxin reductase 1 [Source:HGNC Symbol;Acc:HGNC:12437]                              |
| TXNRD3 | thioredoxin reductase 3 [Source:HGNC Symbol;Acc:HGNC:20667]                              |
| TXNRD2 | thioredoxin reductase 2 [Source:HGNC Symbol;Acc:HGNC:18155]                              |
| ARNT2  | aryl hydrocarbon receptor nuclear translocator 2 [Source:HGNC Symbol;Acc:HGNC:16876]     |
| AR     | androgen receptor [Source:HGNC Symbol;Acc:HGNC:644]                                      |
| KLK3   | kallikrein related peptidase 3 [Source:HGNC Symbol;Acc:HGNC:6364]                        |
| MPO    | myeloperoxidase [Source:HGNC Symbol;Acc:HGNC:7218]                                       |
| SIN3A  | SIN3 transcription regulator family member A [Source:HGNC Symbol;Acc:HGNC:19353]         |
| PER2   | period circadian clock 2 [Source:HGNC Symbol;Acc:HGNC:8846]                              |
| FCGR1A | Fc fragment of IgG receptor Ia [Source:HGNC Symbol;Acc:HGNC:3613]                        |
| CEBPE  | CCAAT/enhancer binding protein epsilon [Source:HGNC Symbol;Acc:HGNC:1836]                |
| ETV6   | ETS variant 6 [Source:HGNC Symbol;Acc:HGNC:3495]                                         |

|        |                                                                                                   |
|--------|---------------------------------------------------------------------------------------------------|
| ETV7   | ETS variant 7 [Source:HGNC Symbol;Acc:HGNC:18160]                                                 |
| DEFA1  | defensin alpha 1 [Source:HGNC Symbol;Acc:HGNC:2761]                                               |
| DEFA3  | defensin alpha 3 [Source:HGNC Symbol;Acc:HGNC:2762]                                               |
| DEFA4  | defensin alpha 4 [Source:HGNC Symbol;Acc:HGNC:2763]                                               |
| DEFA5  | defensin alpha 5 [Source:HGNC Symbol;Acc:HGNC:2764]                                               |
| DEFA6  | defensin alpha 6 [Source:HGNC Symbol;Acc:HGNC:2765]                                               |
| DEFA1B | defensin alpha 1B [Source:HGNC Symbol;Acc:HGNC:33596]                                             |
| ELANE  | elastase, neutrophil expressed [Source:HGNC Symbol;Acc:HGNC:3309]                                 |
| KMT2A  | lysine methyltransferase 2A [Source:HGNC Symbol;Acc:HGNC:7132]                                    |
| AFF1   | AF4/FMR2 family member 1 [Source:HGNC Symbol;Acc:HGNC:7135]                                       |
| CDK9   | cyclin dependent kinase 9 [Source:HGNC Symbol;Acc:HGNC:1780]                                      |
| CCNT1  | cyclin T1 [Source:HGNC Symbol;Acc:HGNC:1599]                                                      |
| CCNT2  | cyclin T2 [Source:HGNC Symbol;Acc:HGNC:1600]                                                      |
| MLLT1  | myeloid/lymphoid or mixed-lineage leukemia; translocated to, 1 [Source:HGNC Symbol;Acc:HGNC:7134] |
| MLLT3  | myeloid/lymphoid or mixed-lineage leukemia; translocated to, 3 [Source:HGNC Symbol;Acc:HGNC:7136] |
| DOT1L  | DOT1 like histone lysine methyltransferase [Source:HGNC Symbol;Acc:HGNC:24948]                    |
| LMO2   | LIM domain only 2 [Source:HGNC Symbol;Acc:HGNC:6642]                                              |
| PBX3   | PBX homeobox 3 [Source:HGNC Symbol;Acc:HGNC:8634]                                                 |
| KLF3   | Kruppel like factor 3 [Source:HGNC Symbol;Acc:HGNC:16516]                                         |
| HOXA9  | homeobox A9 [Source:HGNC Symbol;Acc:HGNC:5109]                                                    |
| HOXA10 | homeobox A10 [Source:HGNC Symbol;Acc:HGNC:5100]                                                   |
| JMJD1C | jumonji domain containing 1C [Source:HGNC Symbol;Acc:HGNC:12313]                                  |
| HMGA2  | high mobility group AT-hook 2 [Source:HGNC Symbol;Acc:HGNC:5009]                                  |
| KDM6A  | lysine demethylase 6A [Source:HGNC Symbol;Acc:HGNC:12637]                                         |
| SUPT3H | SPT3 homolog, SAGA and STAGA complex component [Source:HGNC Symbol;Acc:HGNC:11466]                |
| PROM1  | prominin 1 [Source:HGNC Symbol;Acc:HGNC:9454]                                                     |
| BMP2K  | BMP2 inducible kinase [Source:HGNC Symbol;Acc:HGNC:18041]                                         |
| CDK14  | cyclin dependent kinase 14 [Source:HGNC Symbol;Acc:HGNC:8883]                                     |
| HOXA11 | homeobox A11 [Source:HGNC Symbol;Acc:HGNC:5101]                                                   |
| SIX1   | SIX homeobox 1 [Source:HGNC Symbol;Acc:HGNC:10887]                                                |
| SIX4   | SIX homeobox 4 [Source:HGNC Symbol;Acc:HGNC:10890]                                                |
| EYA1   | EYA transcriptional coactivator and phosphatase 1 [Source:HGNC Symbol;Acc:HGNC:3519]              |
| HPGD   | hydroxyprostaglandin dehydrogenase 15-(NAD) [Source:HGNC Symbol;Acc:HGNC:5154]                    |
| GRIA3  | glutamate ionotropic receptor AMPA type subunit 3 [Source:HGNC Symbol;Acc:HGNC:4573]              |
| FUT8   | fucosyltransferase 8 [Source:HGNC Symbol;Acc:HGNC:4019]                                           |
| TLX3   | T-cell leukemia homeobox 3 [Source:HGNC Symbol;Acc:HGNC:13532]                                    |
| TLX1   | T-cell leukemia homeobox 1 [Source:HGNC Symbol;Acc:HGNC:5056]                                     |
| BCL11B | B-cell CLL/lymphoma 11B [Source:HGNC Symbol;Acc:HGNC:13222]                                       |
| LDB1   | LIM domain binding 1 [Source:HGNC Symbol;Acc:HGNC:6532]                                           |

|          |                                                                                                |
|----------|------------------------------------------------------------------------------------------------|
| LYL1     | lymphoblastic leukemia associated hematopoiesis regulator 1 [Source:HGNC Symbol;Acc:HGNC:6734] |
| HHEX     | hematopoietically expressed homeobox [Source:HGNC Symbol;Acc:HGNC:4901]                        |
| MAF      | MAF bZIP transcription factor [Source:HGNC Symbol;Acc:HGNC:6776]                               |
| WHSC1    | Wolf-Hirschhorn syndrome candidate 1 [Source:HGNC Symbol;Acc:HGNC:12766]                       |
| PAX5     | paired box 5 [Source:HGNC Symbol;Acc:HGNC:8619]                                                |
| PRCC     | papillary renal cell carcinoma (translocation-associated) [Source:HGNC Symbol;Acc:HGNC:9343]   |
| TMPRSS2  | transmembrane protease, serine 2 [Source:HGNC Symbol;Acc:HGNC:11876]                           |
| ERG      | ERG, ETS transcription factor [Source:HGNC Symbol;Acc:HGNC:3446]                               |
| SPINT1   | serine peptidase inhibitor, Kunitz type 1 [Source:HGNC Symbol;Acc:HGNC:11246]                  |
| ETV1     | ETS variant 1 [Source:HGNC Symbol;Acc:HGNC:3490]                                               |
| ETV4     | ETS variant 4 [Source:HGNC Symbol;Acc:HGNC:3493]                                               |
| ETV5     | ETS variant 5 [Source:HGNC Symbol;Acc:HGNC:3494]                                               |
| SLC45A3  | solute carrier family 45 member 3 [Source:HGNC Symbol;Acc:HGNC:8642]                           |
| DDX5     | DEAD-box helicase 5 [Source:HGNC Symbol;Acc:HGNC:2746]                                         |
| MEN1     | menin 1 [Source:HGNC Symbol;Acc:HGNC:7010]                                                     |
| EWSR1    | EWS RNA binding protein 1 [Source:HGNC Symbol;Acc:HGNC:3508]                                   |
| FLI1     | Fli-1 proto-oncogene, ETS transcription factor [Source:HGNC Symbol;Acc:HGNC:3749]              |
| FEV      | FEV, ETS transcription factor [Source:HGNC Symbol;Acc:HGNC:18562]                              |
| WT1      | Wilms tumor 1 [Source:HGNC Symbol;Acc:HGNC:12796]                                              |
| BAIAP3   | BAI1 associated protein 3 [Source:HGNC Symbol;Acc:HGNC:948]                                    |
| TSPAN7   | tetraspanin 7 [Source:HGNC Symbol;Acc:HGNC:11854]                                              |
| MLF1     | myeloid leukemia factor 1 [Source:HGNC Symbol;Acc:HGNC:7125]                                   |
| NR4A3    | nuclear receptor subfamily 4 group A member 3 [Source:HGNC Symbol;Acc:HGNC:7982]               |
| TAF15    | TATA-box binding protein associated factor 15 [Source:HGNC Symbol;Acc:HGNC:11547]              |
| FUS      | FUS RNA binding protein [Source:HGNC Symbol;Acc:HGNC:4010]                                     |
| NFKBIZ   | NFKB inhibitor zeta [Source:HGNC Symbol;Acc:HGNC:29805]                                        |
| PAX7     | paired box 7 [Source:HGNC Symbol;Acc:HGNC:8621]                                                |
| PAX3     | paired box 3 [Source:HGNC Symbol;Acc:HGNC:8617]                                                |
| SS18     | SS18, nBAF chromatin remodeling complex subunit [Source:HGNC Symbol;Acc:HGNC:11340]            |
| SSX1     | SSX family member 1 [Source:HGNC Symbol;Acc:HGNC:11335]                                        |
| SSX2     | SSX family member 2 [Source:HGNC Symbol;Acc:HGNC:11336]                                        |
| SSX2B    | SSX family member 2B [Source:HGNC Symbol;Acc:HGNC:22263]                                       |
| NUPR1    | nuclear protein 1, transcriptional regulator [Source:HGNC Symbol;Acc:HGNC:29990]               |
| ASPSCR1  | ASPSCR1, UBX domain containing tether for SLC2A4 [Source:HGNC Symbol;Acc:HGNC:13825]           |
| TRAF3IP2 | TRAF3 interacting protein 2 [Source:HGNC Symbol;Acc:HGNC:1343]                                 |
| FOSB     | FosB proto-oncogene, AP-1 transcription factor subunit [Source:HGNC Symbol;Acc:HGNC:3797]      |
| MAPK6    | mitogen-activated protein kinase 6 [Source:HGNC Symbol;Acc:HGNC:6879]                          |
| MAPK15   | mitogen-activated protein kinase 15 [Source:HGNC Symbol;Acc:HGNC:24667]                        |
| USP25    | ubiquitin specific peptidase 25 [Source:HGNC Symbol;Acc:HGNC:12624]                            |
| SRSF1    | serine and arginine rich splicing factor 1 [Source:HGNC Symbol;Acc:HGNC:10780]                 |
| DEFB4A   | defensin beta 4A [Source:HGNC Symbol;Acc:HGNC:2767]                                            |

|              |                                                                                                      |
|--------------|------------------------------------------------------------------------------------------------------|
| DEFB4B       | defensin beta 4B [Source:HGNC Symbol;Acc:HGNC:30193]                                                 |
| MUC5AC       | mucin 5AC, oligomeric mucus/gel-forming [Source:HGNC Symbol;Acc:HGNC:7515]                           |
| MUC5B        | mucin 5B, oligomeric mucus/gel-forming [Source:HGNC Symbol;Acc:HGNC:7516]                            |
| S100A7       | S100 calcium binding protein A7 [Source:HGNC Symbol;Acc:HGNC:10497]                                  |
| S100A7A      | S100 calcium binding protein A7A [Source:HGNC Symbol;Acc:HGNC:21657]                                 |
| S100A8       | S100 calcium binding protein A8 [Source:HGNC Symbol;Acc:HGNC:10498]                                  |
| S100A9       | S100 calcium binding protein A9 [Source:HGNC Symbol;Acc:HGNC:10499]                                  |
| LCN2         | lipocalin 2 [Source:HGNC Symbol;Acc:HGNC:6526]                                                       |
| MMP13        | matrix metalloproteinase 13 [Source:HGNC Symbol;Acc:HGNC:7159]                                       |
| RBCK1        | RANBP2-type and C3HC4-type zinc finger containing 1 [Source:HGNC Symbol;Acc:HGNC:15864]              |
| RNF31        | ring finger protein 31 [Source:HGNC Symbol;Acc:HGNC:16031]                                           |
| SHARPIN      | SHANK associated RH domain interactor [Source:HGNC Symbol;Acc:HGNC:25321]                            |
| SPATA2L      | spermatogenesis associated 2 like [Source:HGNC Symbol;Acc:HGNC:28393]                                |
| SPATA2       | spermatogenesis associated 2 [Source:HGNC Symbol;Acc:HGNC:14681]                                     |
| GLUD2        | glutamate dehydrogenase 2 [Source:HGNC Symbol;Acc:HGNC:4336]                                         |
| GLUD1        | glutamate dehydrogenase 1 [Source:HGNC Symbol;Acc:HGNC:4335]                                         |
| GLUL         | glutamate-ammonia ligase [Source:HGNC Symbol;Acc:HGNC:4341]                                          |
| FTH1         | ferritin heavy chain 1 [Source:HGNC Symbol;Acc:HGNC:3976]                                            |
| FTL          | ferritin, light polypeptide [Source:HGNC Symbol;Acc:HGNC:3999]                                       |
| CHMP2A       | charged multivesicular body protein 2A [Source:HGNC Symbol;Acc:HGNC:30216]                           |
| CHMP2B       | charged multivesicular body protein 2B [Source:HGNC Symbol;Acc:HGNC:24537]                           |
| CHMP3        | charged multivesicular body protein 3 [Source:HGNC Symbol;Acc:HGNC:29865]                            |
| RNF103-CHMP3 | RNF103-CHMP3 readthrough [Source:HGNC Symbol;Acc:HGNC:38847]                                         |
| CHMP4B       | charged multivesicular body protein 4B [Source:HGNC Symbol;Acc:HGNC:16171]                           |
| CHMP4A       | charged multivesicular body protein 4A [Source:HGNC Symbol;Acc:HGNC:20274]                           |
| CHMP4C       | charged multivesicular body protein 4C [Source:HGNC Symbol;Acc:HGNC:30599]                           |
| CHMP6        | charged multivesicular body protein 6 [Source:HGNC Symbol;Acc:HGNC:25675]                            |
| VPS4B        | vacuolar protein sorting 4 homolog B [Source:HGNC Symbol;Acc:HGNC:10895]                             |
| VPS4A        | vacuolar protein sorting 4 homolog A [Source:HGNC Symbol;Acc:HGNC:13488]                             |
| CHMP1B       | charged multivesicular body protein 1B [Source:HGNC Symbol;Acc:HGNC:24287]                           |
| CHMP1A       | charged multivesicular body protein 1A [Source:HGNC Symbol;Acc:HGNC:8740]                            |
| CHMP5        | charged multivesicular body protein 5 [Source:HGNC Symbol;Acc:HGNC:26942]                            |
| CHMP7        | charged multivesicular body protein 7 [Source:HGNC Symbol;Acc:HGNC:28439]                            |
| TRPM7        | transient receptor potential cation channel subfamily M member 7 [Source:HGNC Symbol;Acc:HGNC:17994] |
| FAF1         | Fas associated factor 1 [Source:HGNC Symbol;Acc:HGNC:3578]                                           |
| EIF2AK2      | eukaryotic translation initiation factor 2 alpha kinase 2 [Source:HGNC Symbol;Acc:HGNC:9437]         |
| ZBP1         | Z-DNA binding protein 1 [Source:HGNC Symbol;Acc:HGNC:16176]                                          |
| USP21        | ubiquitin specific peptidase 21 [Source:HGNC Symbol;Acc:HGNC:12620]                                  |
| H2AFX        | H2A histone family member X [Source:HGNC Symbol;Acc:HGNC:4739]                                       |
| H2AFY2       | H2A histone family member Y2 [Source:HGNC Symbol;Acc:HGNC:14453]                                     |

|         |                                                                                                                         |
|---------|-------------------------------------------------------------------------------------------------------------------------|
| PPIA    | peptidylprolyl isomerase A [Source:HGNC Symbol;Acc:HGNC:9253]                                                           |
| KIR2DL4 | killer cell immunoglobulin like receptor, two Ig domains and long cytoplasmic tail 4 [Source:HGNC Symbol;Acc:HGNC:6332] |
| MYBL2   | MYB proto-oncogene like 2 [Source:HGNC Symbol;Acc:HGNC:7548]                                                            |
| LIN9    | lin-9 DREAM MuvB core complex component [Source:HGNC Symbol;Acc:HGNC:30830]                                             |
| LIN37   | lin-37 DREAM MuvB core complex component [Source:HGNC Symbol;Acc:HGNC:33234]                                            |
| LIN52   | lin-52 DREAM MuvB core complex component [Source:HGNC Symbol;Acc:HGNC:19856]                                            |
| LIN54   | lin-54 DREAM MuvB core complex component [Source:HGNC Symbol;Acc:HGNC:25397]                                            |
| RBBP4   | RB binding protein 4, chromatin remodeling factor [Source:HGNC Symbol;Acc:HGNC:9887]                                    |
| FOXM1   | forkhead box M1 [Source:HGNC Symbol;Acc:HGNC:3818]                                                                      |
| HIPK3   | homeodomain interacting protein kinase 3 [Source:HGNC Symbol;Acc:HGNC:4915]                                             |
| HIPK1   | homeodomain interacting protein kinase 1 [Source:HGNC Symbol;Acc:HGNC:19006]                                            |
| HIPK2   | homeodomain interacting protein kinase 2 [Source:HGNC Symbol;Acc:HGNC:14402]                                            |
| HIPK4   | homeodomain interacting protein kinase 4 [Source:HGNC Symbol;Acc:HGNC:19007]                                            |
| MRE11A  | MRE11 homolog A, double strand break repair nuclease [Source:HGNC Symbol;Acc:HGNC:7230]                                 |
| RAD50   | RAD50 double strand break repair protein [Source:HGNC Symbol;Acc:HGNC:9816]                                             |
| NBN     | nibrin [Source:HGNC Symbol;Acc:HGNC:7652]                                                                               |
| RAD9A   | RAD9 checkpoint clamp component A [Source:HGNC Symbol;Acc:HGNC:9827]                                                    |
| RAD9B   | RAD9 checkpoint clamp component B [Source:HGNC Symbol;Acc:HGNC:21700]                                                   |
| RAD1    | RAD1 checkpoint DNA exonuclease [Source:HGNC Symbol;Acc:HGNC:9806]                                                      |
| HUS1    | HUS1 checkpoint clamp component [Source:HGNC Symbol;Acc:HGNC:5309]                                                      |
| ZFP36L1 | ZFP36 ring finger protein-like 1 [Source:HGNC Symbol;Acc:HGNC:1107]                                                     |
| ZFP36L2 | ZFP36 ring finger protein-like 2 [Source:HGNC Symbol;Acc:HGNC:1108]                                                     |
| TRPV4   | transient receptor potential cation channel subfamily V member 4 [Source:HGNC Symbol;Acc:HGNC:18083]                    |
| HCK     | HCK proto-oncogene, Src family tyrosine kinase [Source:HGNC Symbol;Acc:HGNC:4840]                                       |
| FGR     | FGR proto-oncogene, Src family tyrosine kinase [Source:HGNC Symbol;Acc:HGNC:3697]                                       |
| GSK3A   | glycogen synthase kinase 3 alpha [Source:HGNC Symbol;Acc:HGNC:4616]                                                     |
| PREX1   | phosphatidylinositol-3,4,5-trisphosphate dependent Rac exchange factor 1 [Source:HGNC Symbol;Acc:HGNC:32594]            |
| ELMO1   | engulfment and cell motility 1 [Source:HGNC Symbol;Acc:HGNC:16286]                                                      |
| DOCK2   | dedicator of cytokinesis 2 [Source:HGNC Symbol;Acc:HGNC:2988]                                                           |
| GRK7    | G protein-coupled receptor kinase 7 [Source:HGNC Symbol;Acc:HGNC:17031]                                                 |
| GRK1    | G protein-coupled receptor kinase 1 [Source:HGNC Symbol;Acc:HGNC:10013]                                                 |
| GRK4    | G protein-coupled receptor kinase 4 [Source:HGNC Symbol;Acc:HGNC:4543]                                                  |
| GRK5    | G protein-coupled receptor kinase 5 [Source:HGNC Symbol;Acc:HGNC:4544]                                                  |
| GRK6    | G protein-coupled receptor kinase 6 [Source:HGNC Symbol;Acc:HGNC:4545]                                                  |
| ANK1    | ankyrin 1 [Source:HGNC Symbol;Acc:HGNC:492]                                                                             |
| ANK2    | ankyrin 2, neuronal [Source:HGNC Symbol;Acc:HGNC:493]                                                                   |
| ANK3    | ankyrin 3, node of Ranvier (ankyrin G) [Source:HGNC Symbol;Acc:HGNC:494]                                                |
| DROSHA  | drosha ribonuclease III [Source:HGNC Symbol;Acc:HGNC:17904]                                                             |
| TWIST2  | twist family bHLH transcription factor 2 [Source:HGNC Symbol;Acc:HGNC:20670]                                            |

|          |                                                                                                       |
|----------|-------------------------------------------------------------------------------------------------------|
| HOXD10   | homeobox D10 [Source:HGNC Symbol;Acc:HGNC:5133]                                                       |
| PDCD4    | programmed cell death 4 (neoplastic transformation inhibitor) [Source:HGNC Symbol;Acc:HGNC:8763]      |
| TFAP4    | transcription factor AP-4 (activating enhancer binding protein 4) [Source:HGNC Symbol;Acc:HGNC:11745] |
| TIMP3    | TIMP metalloproteinase inhibitor 3 [Source:HGNC Symbol;Acc:HGNC:11822]                                |
| HPSE     | heparanase [Source:HGNC Symbol;Acc:HGNC:5164]                                                         |
| HPSE2    | heparanase 2 (inactive) [Source:HGNC Symbol;Acc:HGNC:18374]                                           |
| FRS2     | fibroblast growth factor receptor substrate 2 [Source:HGNC Symbol;Acc:HGNC:16971]                     |
| NUDT16L1 | nudix hydrolase 16 like 1 [Source:HGNC Symbol;Acc:HGNC:28154]                                         |
| HBEGF    | heparin binding EGF like growth factor [Source:HGNC Symbol;Acc:HGNC:3059]                             |
| GPC3     | glypican 3 [Source:HGNC Symbol;Acc:HGNC:4451]                                                         |
| HSPB2    | heat shock protein family B (small) member 2 [Source:HGNC Symbol;Acc:HGNC:5247]                       |
| SLC5A7   | solute carrier family 5 member 7 [Source:HGNC Symbol;Acc:HGNC:14025]                                  |
| SLC44A1  | solute carrier family 44 member 1 [Source:HGNC Symbol;Acc:HGNC:18798]                                 |
| SLC44A4  | solute carrier family 44 member 4 [Source:HGNC Symbol;Acc:HGNC:13941]                                 |
| SLC44A5  | solute carrier family 44 member 5 [Source:HGNC Symbol;Acc:HGNC:28524]                                 |
| SLC44A2  | solute carrier family 44 member 2 [Source:HGNC Symbol;Acc:HGNC:17292]                                 |
| SLC44A3  | solute carrier family 44 member 3 [Source:HGNC Symbol;Acc:HGNC:28689]                                 |
| SLC22A2  | solute carrier family 22 member 2 [Source:HGNC Symbol;Acc:HGNC:10966]                                 |
| SLC22A3  | solute carrier family 22 member 3 [Source:HGNC Symbol;Acc:HGNC:10967]                                 |
| SLC22A5  | solute carrier family 22 member 5 [Source:HGNC Symbol;Acc:HGNC:10969]                                 |
| SLC22A4  | solute carrier family 22 member 4 [Source:HGNC Symbol;Acc:HGNC:10968]                                 |
| CHKA     | choline kinase alpha [Source:HGNC Symbol;Acc:HGNC:1937]                                               |
| CHKB     | choline kinase beta [Source:HGNC Symbol;Acc:HGNC:1938]                                                |
| PCYT1B   | phosphate cytidylyltransferase 1, choline, beta [Source:HGNC Symbol;Acc:HGNC:8755]                    |
| PCYT1A   | phosphate cytidylyltransferase 1, choline, alpha [Source:HGNC Symbol;Acc:HGNC:8754]                   |
| CHPT1    | choline phosphotransferase 1 [Source:HGNC Symbol;Acc:HGNC:17852]                                      |
| LYPLA1   | lysophospholipase I [Source:HGNC Symbol;Acc:HGNC:6737]                                                |
| GPCPD1   | glycerophosphocholine phosphodiesterase 1 [Source:HGNC Symbol;Acc:HGNC:26957]                         |
| SLC7A11  | solute carrier family 7 member 11 [Source:HGNC Symbol;Acc:HGNC:11059]                                 |
| GCLC     | glutamate-cysteine ligase catalytic subunit [Source:HGNC Symbol;Acc:HGNC:4311]                        |
| GCLM     | glutamate-cysteine ligase modifier subunit [Source:HGNC Symbol;Acc:HGNC:4312]                         |
| GSS      | glutathione synthetase [Source:HGNC Symbol;Acc:HGNC:4624]                                             |
| GPX4     | glutathione peroxidase 4 [Source:HGNC Symbol;Acc:HGNC:4556]                                           |
| LPCAT3   | lysophosphatidylcholine acyltransferase 3 [Source:HGNC Symbol;Acc:HGNC:30244]                         |
| SAT2     | spermidine/spermine N1-acetyltransferase family member 2 [Source:HGNC Symbol;Acc:HGNC:23160]          |
| SAT1     | spermidine/spermine N1-acetyltransferase 1 [Source:HGNC Symbol;Acc:HGNC:10540]                        |
| SLC39A8  | solute carrier family 39 member 8 [Source:HGNC Symbol;Acc:HGNC:20862]                                 |
| SLC39A14 | solute carrier family 39 member 14 [Source:HGNC Symbol;Acc:HGNC:20858]                                |
| PCBP2    | poly(rC) binding protein 2 [Source:HGNC Symbol;Acc:HGNC:8648]                                         |

|          |                                                                                                                         |
|----------|-------------------------------------------------------------------------------------------------------------------------|
| SLC40A1  | solute carrier family 40 member 1 [Source:HGNC Symbol;Acc:HGNC:10909]                                                   |
| CP       | ceruloplasmin [Source:HGNC Symbol;Acc:HGNC:2295]                                                                        |
| PCBP1    | poly(rC) binding protein 1 [Source:HGNC Symbol;Acc:HGNC:8647]                                                           |
| PRNP     | prion protein [Source:HGNC Symbol;Acc:HGNC:9449]                                                                        |
| FTMT     | ferritin mitochondrial [Source:HGNC Symbol;Acc:HGNC:17345]                                                              |
| TNFAIP6  | TNF alpha induced protein 6 [Source:HGNC Symbol;Acc:HGNC:11898]                                                         |
| ENG      | endoglin [Source:HGNC Symbol;Acc:HGNC:3349]                                                                             |
| MDK      | midkine (neurite growth-promoting factor 2) [Source:HGNC Symbol;Acc:HGNC:6972]                                          |
| UBD      | ubiquitin D [Source:HGNC Symbol;Acc:HGNC:18795]                                                                         |
| KLK11    | kallikrein related peptidase 11 [Source:HGNC Symbol;Acc:HGNC:6359]                                                      |
| CD69     | CD69 molecule [Source:HGNC Symbol;Acc:HGNC:1694]                                                                        |
| GBP5     | guanylate binding protein 5 [Source:HGNC Symbol;Acc:HGNC:19895]                                                         |
| GNLY     | granulysin [Source:HGNC Symbol;Acc:HGNC:4414]                                                                           |
| ANPEP    | alanyl aminopeptidase, membrane [Source:HGNC Symbol;Acc:HGNC:500]                                                       |
| IL4I1    | interleukin 4 induced 1 [Source:HGNC Symbol;Acc:HGNC:19094]                                                             |
| EIF4A1   | eukaryotic translation initiation factor 4A1 [Source:HGNC Symbol;Acc:HGNC:3282]                                         |
| ELF4     | E74 like ETS transcription factor 4 [Source:HGNC Symbol;Acc:HGNC:3319]                                                  |
| MAP3K7CL | MAP3K7 C-terminal like [Source:HGNC Symbol;Acc:HGNC:16457]                                                              |
| MINK1    | misshapen like kinase 1 [Source:HGNC Symbol;Acc:HGNC:17565]                                                             |
| HAS1     | hyaluronan synthase 1 [Source:HGNC Symbol;Acc:HGNC:4818]                                                                |
| TIPARP   | TCDD inducible poly(ADP-ribose) polymerase [Source:HGNC Symbol;Acc:HGNC:23696]                                          |
| DICER1   | dicer 1, ribonuclease III [Source:HGNC Symbol;Acc:HGNC:17098]                                                           |
| SP7      | Sp7 transcription factor [Source:HGNC Symbol;Acc:HGNC:17321]                                                            |
| SLIT3    | slit guidance ligand 3 [Source:HGNC Symbol;Acc:HGNC:11087]                                                              |
| THY1     | Thy-1 cell surface antigen [Source:HGNC Symbol;Acc:HGNC:11801]                                                          |
| ADK      | adenosine kinase [Source:HGNC Symbol;Acc:HGNC:257]                                                                      |
| ROS1     | ROS proto-oncogene 1, receptor tyrosine kinase [Source:HGNC Symbol;Acc:HGNC:10261]                                      |
| DDOST    | dolichyl-diphosphooligosaccharide--protein glycosyltransferase non-catalytic subunit [Source:HGNC Symbol;Acc:HGNC:2728] |
| TNIK     | TRAF2 and NCK interacting kinase [Source:HGNC Symbol;Acc:HGNC:30765]                                                    |
| ZIC1     | Zic family member 1 [Source:HGNC Symbol;Acc:HGNC:12872]                                                                 |
| NR2E1    | nuclear receptor subfamily 2 group E member 1 [Source:HGNC Symbol;Acc:HGNC:7973]                                        |
| LHX2     | LIM homeobox 2 [Source:HGNC Symbol;Acc:HGNC:6594]                                                                       |
| NR2F1    | nuclear receptor subfamily 2 group F member 1 [Source:HGNC Symbol;Acc:HGNC:7975]                                        |
| MYO10    | myosin X [Source:HGNC Symbol;Acc:HGNC:7593]                                                                             |
| CLIC5    | chloride intracellular channel 5 [Source:HGNC Symbol;Acc:HGNC:13517]                                                    |
| SOX8     | SRY-box 8 [Source:HGNC Symbol;Acc:HGNC:11203]                                                                           |
| OLIG1    | oligodendrocyte transcription factor 1 [Source:HGNC Symbol;Acc:HGNC:16983]                                              |
| RHOC     | ras homolog family member C [Source:HGNC Symbol;Acc:HGNC:669]                                                           |
| NCAN     | neurocan [Source:HGNC Symbol;Acc:HGNC:2465]                                                                             |
| PTPRZ1   | protein tyrosine phosphatase, receptor type Z1 [Source:HGNC Symbol;Acc:HGNC:9685]                                       |
| CIT      | citron rho-interacting serine/threonine kinase [Source:HGNC Symbol;Acc:HGNC:1985]                                       |



|         |                                                                                            |
|---------|--------------------------------------------------------------------------------------------|
| SLC1A3  | solute carrier family 1 member 3 [Source:HGNC Symbol;Acc:HGNC:10941]                       |
| OMG     | oligodendrocyte myelin glycoprotein [Source:HGNC Symbol;Acc:HGNC:8135]                     |
| SLITRK2 | SLIT and NTRK like family member 2 [Source:HGNC Symbol;Acc:HGNC:13449]                     |
| LGI4    | leucine rich repeat LGI family member 4 [Source:HGNC Symbol;Acc:HGNC:18712]                |
| GRIA1   | glutamate ionotropic receptor AMPA type subunit 1 [Source:HGNC Symbol;Acc:HGNC:4571]       |
| CALB1   | calbindin 1 [Source:HGNC Symbol;Acc:HGNC:1434]                                             |
| CCK     | cholecystokinin [Source:HGNC Symbol;Acc:HGNC:1569]                                         |
| DBI     | diazepam binding inhibitor, acyl-CoA binding protein [Source:HGNC Symbol;Acc:HGNC:2690]    |
| KCNJ10  | potassium voltage-gated channel subfamily J member 10 [Source:HGNC Symbol;Acc:HGNC:6256]   |
| KCNJ16  | potassium voltage-gated channel subfamily J member 16 [Source:HGNC Symbol;Acc:HGNC:6262]   |
| METRNL  | meteorin, glial cell differentiation regulator [Source:HGNC Symbol;Acc:HGNC:14151]         |
| METRNL  | meteorin, glial cell differentiation regulator-like [Source:HGNC Symbol;Acc:HGNC:27584]    |
| GNAT2   | G protein subunit alpha transducin 2 [Source:HGNC Symbol;Acc:HGNC:4394]                    |
| IMPG2   | interphotoreceptor matrix proteoglycan 2 [Source:HGNC Symbol;Acc:HGNC:18362]               |
| CNGA1   | cyclic nucleotide gated channel alpha 1 [Source:HGNC Symbol;Acc:HGNC:2148]                 |
| PLEKHB1 | pleckstrin homology domain containing B1 [Source:HGNC Symbol;Acc:HGNC:19079]               |
| CRX     | cone-rod homeobox [Source:HGNC Symbol;Acc:HGNC:2383]                                       |
| AIPL1   | aryl hydrocarbon receptor interacting protein like 1 [Source:HGNC Symbol;Acc:HGNC:359]     |
| SLC24A1 | solute carrier family 24 member 1 [Source:HGNC Symbol;Acc:HGNC:10975]                      |
| FSCN2   | fascin actin-bundling protein 2, retinal [Source:HGNC Symbol;Acc:HGNC:3960]                |
| ROM1    | retinal outer segment membrane protein 1 [Source:HGNC Symbol;Acc:HGNC:10254]               |
| OPN1LW  | opsin 1 (cone pigments), long-wave-sensitive [Source:HGNC Symbol;Acc:HGNC:9936]            |
| OPN1MW  | opsin 1 (cone pigments), medium-wave-sensitive [Source:HGNC Symbol;Acc:HGNC:4206]          |
| TULP1   | tubby like protein 1 [Source:HGNC Symbol;Acc:HGNC:12423]                                   |
| RP1L1   | retinitis pigmentosa 1-like 1 [Source:HGNC Symbol;Acc:HGNC:15946]                          |
| GUCA1A  | guanylate cyclase activator 1A [Source:HGNC Symbol;Acc:HGNC:4678]                          |
| PRPH2   | peripherin 2 [Source:HGNC Symbol;Acc:HGNC:9942]                                            |
| CNGB1   | cyclic nucleotide gated channel beta 1 [Source:HGNC Symbol;Acc:HGNC:2151]                  |
| CD9     | CD9 molecule [Source:HGNC Symbol;Acc:HGNC:1709]                                            |
| AURKA   | aurora kinase A [Source:HGNC Symbol;Acc:HGNC:11393]                                        |
| ENTPD1  | ectonucleoside triphosphate diphosphohydrolase 1 [Source:HGNC Symbol;Acc:HGNC:3363]        |
| ARID1A  | AT-rich interaction domain 1A [Source:HGNC Symbol;Acc:HGNC:11110]                          |
| HNF1A   | HNF1 homeobox A [Source:HGNC Symbol;Acc:HGNC:11621]                                        |
| TOX     | thymocyte selection associated high mobility group box [Source:HGNC Symbol;Acc:HGNC:18988] |
| LRRC23  | leucine rich repeat containing 23 [Source:HGNC Symbol;Acc:HGNC:19138]                      |
| CLC     | Charcot-Leyden crystal galectin [Source:HGNC Symbol;Acc:HGNC:2014]                         |
| MICA    | MHC class I polypeptide-related sequence A [Source:HGNC Symbol;Acc:HGNC:7090]              |
| KLRK1   | killer cell lectin like receptor K1 [Source:HGNC Symbol;Acc:HGNC:18788]                    |
| NCR3    | natural cytotoxicity triggering receptor 3 [Source:HGNC Symbol;Acc:HGNC:19077]             |

|          |                                                                                                                                                               |
|----------|---------------------------------------------------------------------------------------------------------------------------------------------------------------|
| LAG3     | lymphocyte activating 3 [Source:HGNC Symbol;Acc:HGNC:6476]                                                                                                    |
| PROK2    | prokineticin 2 [Source:HGNC Symbol;Acc:HGNC:18455]                                                                                                            |
| ABO      | ABO blood group (transferase A, alpha 1-3-N-acetylgalactosaminyltransferase; transferase B, alpha 1-3-galactosyltransferase) [Source:HGNC Symbol;Acc:HGNC:79] |
| BTLA     | B and T lymphocyte associated [Source:HGNC Symbol;Acc:HGNC:21087]                                                                                             |
| ABCB7    | ATP binding cassette subfamily B member 7 [Source:HGNC Symbol;Acc:HGNC:48]                                                                                    |
| SERPINA3 | serpin family A member 3 [Source:HGNC Symbol;Acc:HGNC:16]                                                                                                     |
| FOXP3    | forkhead box P3 [Source:HGNC Symbol;Acc:HGNC:6106]                                                                                                            |
| B2M      | beta-2-microglobulin [Source:HGNC Symbol;Acc:HGNC:914]                                                                                                        |
| ZFP36    | ZFP36 ring finger protein [Source:HGNC Symbol;Acc:HGNC:12862]                                                                                                 |
| SLPI     | secretory leukocyte peptidase inhibitor [Source:HGNC Symbol;Acc:HGNC:11092]                                                                                   |
| IGFBP2   | insulin like growth factor binding protein 2 [Source:HGNC Symbol;Acc:HGNC:5471]                                                                               |
| FCGBP    | Fc fragment of IgG binding protein [Source:HGNC Symbol;Acc:HGNC:13572]                                                                                        |
| TSPEAR   | thrombospondin type laminin G domain and EAR repeats [Source:HGNC Symbol;Acc:HGNC:1268]                                                                       |
| MUC1     | mucin 1, cell surface associated [Source:HGNC Symbol;Acc:HGNC:7508]                                                                                           |
| KISS1    | KISS-1 metastasis-suppressor [Source:HGNC Symbol;Acc:HGNC:6341]                                                                                               |
| ADGRG1   | adhesion G protein-coupled receptor G1 [Source:HGNC Symbol;Acc:HGNC:4512]                                                                                     |
| PTH1H    | parathyroid hormone-like hormone [Source:HGNC Symbol;Acc:HGNC:9607]                                                                                           |
| BRMS1    | breast cancer metastasis suppressor 1 [Source:HGNC Symbol;Acc:HGNC:17262]                                                                                     |
| NME1     | NME/NM23 nucleoside diphosphate kinase 1 [Source:HGNC Symbol;Acc:HGNC:7849]                                                                                   |
| TINAGL1  | tubulointerstitial nephritis antigen like 1 [Source:HGNC Symbol;Acc:HGNC:19168]                                                                               |
| ESYT3    | extended synaptotagmin 3 [Source:HGNC Symbol;Acc:HGNC:24295]                                                                                                  |
| FKBP10   | FK506 binding protein 10 [Source:HGNC Symbol;Acc:HGNC:18169]                                                                                                  |
| NEDD9    | neural precursor cell expressed, developmentally down-regulated 9 [Source:HGNC Symbol;Acc:HGNC:7733]                                                          |
| TBC1D16  | TBC1 domain family member 16 [Source:HGNC Symbol;Acc:HGNC:28356]                                                                                              |
| AEBP1    | AE binding protein 1 [Source:HGNC Symbol;Acc:HGNC:303]                                                                                                        |
| MTA1     | metastasis associated 1 [Source:HGNC Symbol;Acc:HGNC:7410]                                                                                                    |
| PNCK     | pregnancy up-regulated nonubiquitous CaM kinase [Source:HGNC Symbol;Acc:HGNC:13415]                                                                           |
| CENPJ    | centromere protein J [Source:HGNC Symbol;Acc:HGNC:17272]                                                                                                      |
| MCAM     | melanoma cell adhesion molecule [Source:HGNC Symbol;Acc:HGNC:6934]                                                                                            |
| BACH1    | BTB domain and CNC homolog 1 [Source:HGNC Symbol;Acc:HGNC:935]                                                                                                |
| MAFF     | MAF bZIP transcription factor F [Source:HGNC Symbol;Acc:HGNC:6780]                                                                                            |
| ACKR1    | atypical chemokine receptor 1 (Duffy blood group) [Source:HGNC Symbol;Acc:HGNC:4035]                                                                          |
| FRMD4A   | FERM domain containing 4A [Source:HGNC Symbol;Acc:HGNC:25491]                                                                                                 |
| CD24     | CD24 molecule [Source:HGNC Symbol;Acc:HGNC:1645]                                                                                                              |
| ABCB5    | ATP binding cassette subfamily B member 5 [Source:HGNC Symbol;Acc:HGNC:46]                                                                                    |
| SOX4     | SRY-box 4 [Source:HGNC Symbol;Acc:HGNC:11200]                                                                                                                 |
| EPCAM    | epithelial cell adhesion molecule [Source:HGNC Symbol;Acc:HGNC:11529]                                                                                         |
| LINGO2   | leucine rich repeat and Ig domain containing 2 [Source:HGNC Symbol;Acc:HGNC:21207]                                                                            |
| CEACAM8  | carcinoembryonic antigen related cell adhesion molecule 8 [Source:HGNC Symbol;Acc:HGNC:1820]                                                                  |

|          |                                                                                                             |
|----------|-------------------------------------------------------------------------------------------------------------|
| NELFCD   | negative elongation factor complex member C/D [Source:HGNC Symbol;Acc:HGNC:15934]                           |
| HDAC3    | histone deacetylase 3 [Source:HGNC Symbol;Acc:HGNC:4854]                                                    |
| HDAC9    | histone deacetylase 9 [Source:HGNC Symbol;Acc:HGNC:14065]                                                   |
| LOXL2    | lysyl oxidase like 2 [Source:HGNC Symbol;Acc:HGNC:6666]                                                     |
| MIF      | macrophage migration inhibitory factor (glycosylation-inhibiting factor) [Source:HGNC Symbol;Acc:HGNC:7097] |
| EPHA1    | EPH receptor A1 [Source:HGNC Symbol;Acc:HGNC:3385]                                                          |
| CDK5     | cyclin dependent kinase 5 [Source:HGNC Symbol;Acc:HGNC:1774]                                                |
| SEMA4D   | semaphorin 4D [Source:HGNC Symbol;Acc:HGNC:10732]                                                           |
| MACC1    | metastasis associated in colon cancer 1 [Source:HGNC Symbol;Acc:HGNC:30215]                                 |
| WWOX     | WW domain containing oxidoreductase [Source:HGNC Symbol;Acc:HGNC:12799]                                     |
| EPHA3    | EPH receptor A3 [Source:HGNC Symbol;Acc:HGNC:3387]                                                          |
| NTS      | neurotensin [Source:HGNC Symbol;Acc:HGNC:8038]                                                              |
| TM4SF5   | transmembrane 4 L six family member 5 [Source:HGNC Symbol;Acc:HGNC:11857]                                   |
| BCL9     | B-cell CLL/lymphoma 9 [Source:HGNC Symbol;Acc:HGNC:1008]                                                    |
| NPY4R    | neuropeptide Y receptor Y4 [Source:HGNC Symbol;Acc:HGNC:9329]                                               |
| LOXL1    | lysyl oxidase like 1 [Source:HGNC Symbol;Acc:HGNC:6665]                                                     |
| XAF1     | XIAP associated factor 1 [Source:HGNC Symbol;Acc:HGNC:30932]                                                |
| CAMP     | cathelicidin antimicrobial peptide [Source:HGNC Symbol;Acc:HGNC:1472]                                       |
| EPHB2    | EPH receptor B2 [Source:HGNC Symbol;Acc:HGNC:3393]                                                          |
| TIMP2    | TIMP metalloproteinase inhibitor 2 [Source:HGNC Symbol;Acc:HGNC:11821]                                      |
| PPP1R15A | protein phosphatase 1 regulatory subunit 15A [Source:HGNC Symbol;Acc:HGNC:14375]                            |
| IRF6     | interferon regulatory factor 6 [Source:HGNC Symbol;Acc:HGNC:6121]                                           |
| HYOU1    | hypoxia up-regulated 1 [Source:HGNC Symbol;Acc:HGNC:16931]                                                  |
| MBTPS1   | membrane bound transcription factor peptidase, site 1 [Source:HGNC Symbol;Acc:HGNC:15456]                   |
| MBTPS2   | membrane bound transcription factor peptidase, site 2 [Source:HGNC Symbol;Acc:HGNC:15455]                   |
| RPAP2    | RNA polymerase II associated protein 2 [Source:HGNC Symbol;Acc:HGNC:25791]                                  |
| T        | T brachyury transcription factor [Source:HGNC Symbol;Acc:HGNC:11515]                                        |
| DNAJC3   | DnaJ heat shock protein family (Hsp40) member C3 [Source:HGNC Symbol;Acc:HGNC:9439]                         |
| INSIG1   | insulin induced gene 1 [Source:HGNC Symbol;Acc:HGNC:6083]                                                   |
| SCAP     | SREBF chaperone [Source:HGNC Symbol;Acc:HGNC:30634]                                                         |
| HMGCS1   | 3-hydroxy-3-methylglutaryl-CoA synthase 1 [Source:HGNC Symbol;Acc:HGNC:5007]                                |
| EZH2     | enhancer of zeste 2 polycomb repressive complex 2 subunit [Source:HGNC Symbol;Acc:HGNC:3527]                |
| DNAJA1   | DnaJ heat shock protein family (Hsp40) member A1 [Source:HGNC Symbol;Acc:HGNC:5229]                         |
| SEC61A1  | Sec61 translocon alpha 1 subunit [Source:HGNC Symbol;Acc:HGNC:18276]                                        |
| EIF2B1   | eukaryotic translation initiation factor 2B subunit alpha [Source:HGNC Symbol;Acc:HGNC:3257]                |
| LMOD1    | leiomodin 1 [Source:HGNC Symbol;Acc:HGNC:6647]                                                              |
| SEC23A   | Sec23 homolog A, coat complex II component [Source:HGNC Symbol;Acc:HGNC:10701]                              |
| EIF5     | eukaryotic translation initiation factor 5 [Source:HGNC Symbol;Acc:HGNC:3299]                               |
| EDEM1    | ER degradation enhancing alpha-mannosidase like protein 1 [Source:HGNC Symbol;Acc:HGNC:18967]               |

|          |                                                                                              |
|----------|----------------------------------------------------------------------------------------------|
| EIF2S2   | eukaryotic translation initiation factor 2 subunit beta [Source:HGNC Symbol;Acc:HGNC:3266]   |
| EIF3C    | eukaryotic translation initiation factor 3 subunit C [Source:HGNC Symbol;Acc:HGNC:3279]      |
| EIF4G2   | eukaryotic translation initiation factor 4 gamma 2 [Source:HGNC Symbol;Acc:HGNC:3297]        |
| ERN2     | endoplasmic reticulum to nucleus signaling 2 [Source:HGNC Symbol;Acc:HGNC:16942]             |
| DNAJB6   | DnaJ heat shock protein family (Hsp40) member B6 [Source:HGNC Symbol;Acc:HGNC:14888]         |
| DNAJA2   | DnaJ heat shock protein family (Hsp40) member A2 [Source:HGNC Symbol;Acc:HGNC:14884]         |
| DNAJC14  | DnaJ heat shock protein family (Hsp40) member C14 [Source:HGNC Symbol;Acc:HGNC:24581]        |
| SLC6A9   | solute carrier family 6 member 9 [Source:HGNC Symbol;Acc:HGNC:11056]                         |
| TRIB3    | tribbles pseudokinase 3 [Source:HGNC Symbol;Acc:HGNC:16228]                                  |
| ABCD1    | ATP binding cassette subfamily D member 1 [Source:HGNC Symbol;Acc:HGNC:61]                   |
| ALPI     | alkaline phosphatase, intestinal [Source:HGNC Symbol;Acc:HGNC:437]                           |
| BGLAP    | bone gamma-carboxyglutamate protein [Source:HGNC Symbol;Acc:HGNC:1043]                       |
| CEACAM1  | carcinoembryonic antigen related cell adhesion molecule 1 [Source:HGNC Symbol;Acc:HGNC:1814] |
| PRDM1    | PR domain 1 [Source:HGNC Symbol;Acc:HGNC:9346]                                               |
| S100G    | S100 calcium binding protein G [Source:HGNC Symbol;Acc:HGNC:1436]                            |
| CASP5    | caspase 5 [Source:HGNC Symbol;Acc:HGNC:1506]                                                 |
| CCNC     | cyclin C [Source:HGNC Symbol;Acc:HGNC:1581]                                                  |
| ADGRE5   | adhesion G protein-coupled receptor E5 [Source:HGNC Symbol;Acc:HGNC:1711]                    |
| CDX2     | caudal type homeobox 2 [Source:HGNC Symbol;Acc:HGNC:1806]                                    |
| COL13A1  | collagen type XIII alpha 1 chain [Source:HGNC Symbol;Acc:HGNC:2190]                          |
| CST1     | cystatin SN [Source:HGNC Symbol;Acc:HGNC:2473]                                               |
| CST6     | cystatin E/M [Source:HGNC Symbol;Acc:HGNC:2478]                                              |
| SERPINB1 | serpin family B member 1 [Source:HGNC Symbol;Acc:HGNC:3311]                                  |
| EPHB4    | EPH receptor B4 [Source:HGNC Symbol;Acc:HGNC:3395]                                           |
| IRF8     | interferon regulatory factor 8 [Source:HGNC Symbol;Acc:HGNC:5358]                            |
| IGFBP1   | insulin like growth factor binding protein 1 [Source:HGNC Symbol;Acc:HGNC:5469]              |
| IGFBP5   | insulin like growth factor binding protein 5 [Source:HGNC Symbol;Acc:HGNC:5474]              |
| IRF4     | interferon regulatory factor 4 [Source:HGNC Symbol;Acc:HGNC:6119]                            |
| KRT13    | keratin 13 [Source:HGNC Symbol;Acc:HGNC:6415]                                                |
| KRT16    | keratin 16 [Source:HGNC Symbol;Acc:HGNC:6423]                                                |
| KRT34    | keratin 34 [Source:HGNC Symbol;Acc:HGNC:6452]                                                |
| LGALS9   | galectin 9 [Source:HGNC Symbol;Acc:HGNC:6570]                                                |
| MXD1     | MAX dimerization protein 1 [Source:HGNC Symbol;Acc:HGNC:6761]                                |
| CD200    | CD200 molecule [Source:HGNC Symbol;Acc:HGNC:7203]                                            |
| MX2      | MX dynamin like GTPase 2 [Source:HGNC Symbol;Acc:HGNC:7533]                                  |
| MYO9B    | myosin IXB [Source:HGNC Symbol;Acc:HGNC:7609]                                                |
| NINJ1    | ninjurin 1 [Source:HGNC Symbol;Acc:HGNC:7824]                                                |
| ORM1     | orosomucoid 1 [Source:HGNC Symbol;Acc:HGNC:8498]                                             |
| ORM2     | orosomucoid 2 [Source:HGNC Symbol;Acc:HGNC:8499]                                             |
| PNOC     | prepronociceptin [Source:HGNC Symbol;Acc:HGNC:9163]                                          |
| KLK6     | kallikrein related peptidase 6 [Source:HGNC Symbol;Acc:HGNC:6367]                            |

|          |                                                                                                      |
|----------|------------------------------------------------------------------------------------------------------|
| PTH      | parathyroid hormone [Source:HGNC Symbol;Acc:HGNC:9606]                                               |
| S100A2   | S100 calcium binding protein A2 [Source:HGNC Symbol;Acc:HGNC:10492]                                  |
| S100A4   | S100 calcium binding protein A4 [Source:HGNC Symbol;Acc:HGNC:10494]                                  |
| S100A6   | S100 calcium binding protein A6 [Source:HGNC Symbol;Acc:HGNC:10496]                                  |
| SATB1    | SATB homeobox 1 [Source:HGNC Symbol;Acc:HGNC:10541]                                                  |
| SPRR1B   | small proline rich protein 1B [Source:HGNC Symbol;Acc:HGNC:11260]                                    |
| SULT1C2  | sulfotransferase family 1C member 2 [Source:HGNC Symbol;Acc:HGNC:11456]                              |
| TPM1     | tropomyosin 1 (alpha) [Source:HGNC Symbol;Acc:HGNC:12010]                                            |
| SEMA3B   | semaphorin 3B [Source:HGNC Symbol;Acc:HGNC:10724]                                                    |
| NRIP1    | nuclear receptor interacting protein 1 [Source:HGNC Symbol;Acc:HGNC:8001]                            |
| KRT38    | keratin 38 [Source:HGNC Symbol;Acc:HGNC:6456]                                                        |
| ASAP2    | ArfGAP with SH3 domain, ankyrin repeat and PH domain 2 [Source:HGNC Symbol;Acc:HGNC:2721]            |
| KL       | klotho [Source:HGNC Symbol;Acc:HGNC:6344]                                                            |
| ATP2C2   | ATPase secretory pathway Ca <sup>2+</sup> transporting 2 [Source:HGNC Symbol;Acc:HGNC:29103]         |
| LPGAT1   | lysophosphatidylglycerol acyltransferase 1 [Source:HGNC Symbol;Acc:HGNC:28985]                       |
| SLC34A2  | solute carrier family 34 member 2 [Source:HGNC Symbol;Acc:HGNC:11020]                                |
| ADAMTS5  | ADAM metalloproteinase with thrombospondin type 1 motif 5 [Source:HGNC Symbol;Acc:HGNC:221]          |
| TRAK1    | trafficking kinesin protein 1 [Source:HGNC Symbol;Acc:HGNC:29947]                                    |
| IGSF9B   | immunoglobulin superfamily member 9B [Source:HGNC Symbol;Acc:HGNC:32326]                             |
| CLEC16A  | C-type lectin domain family 16 member A [Source:HGNC Symbol;Acc:HGNC:29013]                          |
| CASP14   | caspase 14 [Source:HGNC Symbol;Acc:HGNC:1502]                                                        |
| SOSTDC1  | sclerostin domain containing 1 [Source:HGNC Symbol;Acc:HGNC:21748]                                   |
| LCE2B    | late cornified envelope 2B [Source:HGNC Symbol;Acc:HGNC:16610]                                       |
| CYP2S1   | cytochrome P450 family 2 subfamily S member 1 [Source:HGNC Symbol;Acc:HGNC:15654]                    |
| HILPDA   | hypoxia inducible lipid droplet associated [Source:HGNC Symbol;Acc:HGNC:28859]                       |
| G0S2     | G0/G1 switch 2 [Source:HGNC Symbol;Acc:HGNC:30229]                                                   |
| TREM1    | triggering receptor expressed on myeloid cells 1 [Source:HGNC Symbol;Acc:HGNC:17760]                 |
| CDKAL1   | CDK5 regulatory subunit associated protein 1 like 1 [Source:HGNC Symbol;Acc:HGNC:21050]              |
| MED9     | mediator complex subunit 9 [Source:HGNC Symbol;Acc:HGNC:25487]                                       |
| TRPV6    | transient receptor potential cation channel subfamily V member 6 [Source:HGNC Symbol;Acc:HGNC:14006] |
| LRRC8A   | leucine rich repeat containing 8 family member A [Source:HGNC Symbol;Acc:HGNC:19027]                 |
| TRPV5    | transient receptor potential cation channel subfamily V member 5 [Source:HGNC Symbol;Acc:HGNC:3145]  |
| SALL4    | spalt like transcription factor 4 [Source:HGNC Symbol;Acc:HGNC:15924]                                |
| COLEC11  | collectin subfamily member 11 [Source:HGNC Symbol;Acc:HGNC:17213]                                    |
| STEAP4   | STEAP4 metalloproteinase [Source:HGNC Symbol;Acc:HGNC:21923]                                         |
| CLMN     | calmin (calponin-like, transmembrane) [Source:HGNC Symbol;Acc:HGNC:19972]                            |
| CLPTM1L  | CLPTM1-like [Source:HGNC Symbol;Acc:HGNC:24308]                                                      |
| CRACR2A  | calcium release activated channel regulator 2A [Source:HGNC Symbol;Acc:HGNC:28657]                   |
| KRTAP4-1 | keratin associated protein 4-1 [Source:HGNC Symbol;Acc:HGNC:18907]                                   |

|           |                                                                                                      |
|-----------|------------------------------------------------------------------------------------------------------|
| DNER      | delta/notch like EGF repeat containing [Source:HGNC Symbol;Acc:HGNC:24456]                           |
| KRT71     | keratin 71 [Source:HGNC Symbol;Acc:HGNC:28927]                                                       |
| ZNF257    | zinc finger protein 257 [Source:HGNC Symbol;Acc:HGNC:13498]                                          |
| LRRC25    | leucine rich repeat containing 25 [Source:HGNC Symbol;Acc:HGNC:29806]                                |
| DACT2     | dishevelled binding antagonist of beta catenin 2 [Source:HGNC Symbol;Acc:HGNC:21231]                 |
| CREG2     | cellular repressor of E1A stimulated genes 2 [Source:HGNC Symbol;Acc:HGNC:14272]                     |
| SLC37A2   | solute carrier family 37 member 2 [Source:HGNC Symbol;Acc:HGNC:20644]                                |
| CRACR2B   | calcium release activated channel regulator 2B [Source:HGNC Symbol;Acc:HGNC:28703]                   |
| KRTAP8-1  | keratin associated protein 8-1 [Source:HGNC Symbol;Acc:HGNC:18935]                                   |
| LCE1D     | late cornified envelope 1D [Source:HGNC Symbol;Acc:HGNC:29465]                                       |
| LCE1F     | late cornified envelope 1F [Source:HGNC Symbol;Acc:HGNC:29467]                                       |
| KRTAP12-2 | keratin associated protein 12-2 [Source:HGNC Symbol;Acc:HGNC:20530]                                  |
| DND1      | DND microRNA-mediated repression inhibitor 1 [Source:HGNC Symbol;Acc:HGNC:23799]                     |
| KRTAP10-4 | keratin associated protein 10-4 [Source:HGNC Symbol;Acc:HGNC:20521]                                  |
| KRTAP10-7 | keratin associated protein 10-7 [Source:HGNC Symbol;Acc:HGNC:22970]                                  |
| KRTAP10-9 | keratin associated protein 10-9 [Source:HGNC Symbol;Acc:HGNC:22971]                                  |
| KRTAP10-2 | keratin associated protein 10-2 [Source:HGNC Symbol;Acc:HGNC:22967]                                  |
| KRTAP5-1  | keratin associated protein 5-1 [Source:HGNC Symbol;Acc:HGNC:23596]                                   |
| KRTAP5-4  | keratin associated protein 5-4 [Source:HGNC Symbol;Acc:HGNC:23599]                                   |
| DEFB132   | defensin beta 132 [Source:HGNC Symbol;Acc:HGNC:33806]                                                |
| GXYLT2    | glucoside xylosyltransferase 2 [Source:HGNC Symbol;Acc:HGNC:33383]                                   |
| ALPPL2    | alkaline phosphatase, placental like 2 [Source:HGNC Symbol;Acc:HGNC:441]                             |
| GC        | GC, vitamin D binding protein [Source:HGNC Symbol;Acc:HGNC:4187]                                     |
| MED1      | mediator complex subunit 1 [Source:HGNC Symbol;Acc:HGNC:9234]                                        |
| DBP       | D-box binding PAR bZIP transcription factor [Source:HGNC Symbol;Acc:HGNC:2697]                       |
| PDIA3     | protein disulfide isomerase family A member 3 [Source:HGNC Symbol;Acc:HGNC:4606]                     |
| PLAA      | phospholipase A2 activating protein [Source:HGNC Symbol;Acc:HGNC:9043]                               |
| CALR      | calreticulin [Source:HGNC Symbol;Acc:HGNC:1455]                                                      |
| CANX      | calnexin [Source:HGNC Symbol;Acc:HGNC:1473]                                                          |
| AHR       | aryl hydrocarbon receptor [Source:HGNC Symbol;Acc:HGNC:348]                                          |
| RORA      | RAR related orphan receptor A [Source:HGNC Symbol;Acc:HGNC:10258]                                    |
| PHEX      | phosphate regulating endopeptidase homolog, X-linked [Source:HGNC Symbol;Acc:HGNC:8918]              |
| MZF1      | myeloid zinc finger 1 [Source:HGNC Symbol;Acc:HGNC:13108]                                            |
| CASR      | calcium sensing receptor [Source:HGNC Symbol;Acc:HGNC:1514]                                          |
| WNK4      | WNK lysine deficient protein kinase 4 [Source:HGNC Symbol;Acc:HGNC:14544]                            |
| TRPV2     | transient receptor potential cation channel subfamily V member 2 [Source:HGNC Symbol;Acc:HGNC:18082] |
| POU1F1    | POU class 1 homeobox 1 [Source:HGNC Symbol;Acc:HGNC:9210]                                            |
| REPIN1    | replication initiator 1 [Source:HGNC Symbol;Acc:HGNC:17922]                                          |
| KCNJ1     | potassium voltage-gated channel subfamily J member 1 [Source:HGNC Symbol;Acc:HGNC:6255]              |
| BANF1     | barrier to autointegration factor 1 [Source:HGNC Symbol;Acc:HGNC:17397]                              |
| BRD7      | bromodomain containing 7 [Source:HGNC Symbol;Acc:HGNC:14310]                                         |

|          |                                                                                                                                       |
|----------|---------------------------------------------------------------------------------------------------------------------------------------|
| BRD9     | bromodomain containing 9 [Source:HGNC Symbol;Acc:HGNC:25818]                                                                          |
| SLC34A1  | solute carrier family 34 member 1 [Source:HGNC Symbol;Acc:HGNC:11019]                                                                 |
| SLC20A1  | solute carrier family 20 member 1 [Source:HGNC Symbol;Acc:HGNC:10946]                                                                 |
| SLC20A2  | solute carrier family 20 member 2 [Source:HGNC Symbol;Acc:HGNC:10947]                                                                 |
| TRPC1    | transient receptor potential cation channel subfamily C member 1 [Source:HGNC Symbol;Acc:HGNC:12333]                                  |
| ALPL     | alkaline phosphatase, liver/bone/kidney [Source:HGNC Symbol;Acc:HGNC:438]                                                             |
| CD93     | CD93 molecule [Source:HGNC Symbol;Acc:HGNC:15855]                                                                                     |
| SEMA6B   | semaphorin 6B [Source:HGNC Symbol;Acc:HGNC:10739]                                                                                     |
| SRGN     | serglycin [Source:HGNC Symbol;Acc:HGNC:9361]                                                                                          |
| THEMIS2  | thymocyte selection associated family member 2 [Source:HGNC Symbol;Acc:HGNC:16839]                                                    |
| PDLIM4   | PDZ and LIM domain 4 [Source:HGNC Symbol;Acc:HGNC:16501]                                                                              |
| TMEM37   | transmembrane protein 37 [Source:HGNC Symbol;Acc:HGNC:18216]                                                                          |
| PDZD7    | PDZ domain containing 7 [Source:HGNC Symbol;Acc:HGNC:26257]                                                                           |
| PPARGC1B | PPARG coactivator 1 beta [Source:HGNC Symbol;Acc:HGNC:30022]                                                                          |
| SMPDL3A  | sphingomyelin phosphodiesterase acid like 3A [Source:HGNC Symbol;Acc:HGNC:17389]                                                      |
| DPF3     | double PHD fingers 3 [Source:HGNC Symbol;Acc:HGNC:17427]                                                                              |
| MYBBP1A  | MYB binding protein 1a [Source:HGNC Symbol;Acc:HGNC:7546]                                                                             |
| YY1      | YY1 transcription factor [Source:HGNC Symbol;Acc:HGNC:12856]                                                                          |
| NAT1     | N-acetyltransferase 1 (arylamine N-acetyltransferase) [Source:HGNC Symbol;Acc:HGNC:7645]                                              |
| SLC1A1   | solute carrier family 1 member 1 [Source:HGNC Symbol;Acc:HGNC:10939]                                                                  |
| CCNJ     | cyclin J [Source:HGNC Symbol;Acc:HGNC:23434]                                                                                          |
| MICB     | MHC class I polypeptide-related sequence B [Source:HGNC Symbol;Acc:HGNC:7091]                                                         |
| ULBP2    | UL16 binding protein 2 [Source:HGNC Symbol;Acc:HGNC:14894]                                                                            |
| KDM3A    | lysine demethylase 3A [Source:HGNC Symbol;Acc:HGNC:20815]                                                                             |
| NCOA2    | nuclear receptor coactivator 2 [Source:HGNC Symbol;Acc:HGNC:7669]                                                                     |
| PDLIM2   | PDZ and LIM domain 2 [Source:HGNC Symbol;Acc:HGNC:13992]                                                                              |
| SMARCA1  | SWI/SNF related, matrix associated, actin dependent regulator of chromatin, subfamily a, member 1 [Source:HGNC Symbol;Acc:HGNC:11097] |
| ARNTL    | aryl hydrocarbon receptor nuclear translocator like [Source:HGNC Symbol;Acc:HGNC:701]                                                 |
| SOD1     | superoxide dismutase 1, soluble [Source:HGNC Symbol;Acc:HGNC:11179]                                                                   |
| TP53BP1  | tumor protein p53 binding protein 1 [Source:HGNC Symbol;Acc:HGNC:11999]                                                               |
| DAP3     | death associated protein 3 [Source:HGNC Symbol;Acc:HGNC:2673]                                                                         |
| DNMT1    | DNA (cytosine-5-)-methyltransferase 1 [Source:HGNC Symbol;Acc:HGNC:2976]                                                              |
| FOXP1    | forkhead box K1 [Source:HGNC Symbol;Acc:HGNC:23480]                                                                                   |
| GLIS3    | GLIS family zinc finger 3 [Source:HGNC Symbol;Acc:HGNC:28510]                                                                         |
| KCNF1    | potassium voltage-gated channel modifier subfamily F member 1 [Source:HGNC Symbol;Acc:HGNC:6246]                                      |
| LTK      | leukocyte receptor tyrosine kinase [Source:HGNC Symbol;Acc:HGNC:6721]                                                                 |
| NFIA     | nuclear factor I A [Source:HGNC Symbol;Acc:HGNC:7784]                                                                                 |
| POU4F2   | POU class 4 homeobox 2 [Source:HGNC Symbol;Acc:HGNC:9219]                                                                             |
| PPP1R3G  | protein phosphatase 1 regulatory subunit 3G [Source:HGNC Symbol;Acc:HGNC:14945]                                                       |

|          |                                                                                                   |
|----------|---------------------------------------------------------------------------------------------------|
| REM1     | RRAD and GEM like GTPase 1 [Source:HGNC Symbol;Acc:HGNC:15922]                                    |
| SFXN3    | sideroflexin 3 [Source:HGNC Symbol;Acc:HGNC:16087]                                                |
| SP100    | SP100 nuclear antigen [Source:HGNC Symbol;Acc:HGNC:11206]                                         |
| KCTD12   | potassium channel tetramerization domain containing 12 [Source:HGNC Symbol;Acc:HGNC:14678]        |
| ITSN1    | intersectin 1 [Source:HGNC Symbol;Acc:HGNC:6183]                                                  |
| TRIM38   | tripartite motif containing 38 [Source:HGNC Symbol;Acc:HGNC:10059]                                |
| ELL2     | elongation factor for RNA polymerase II 2 [Source:HGNC Symbol;Acc:HGNC:17064]                     |
| MARCKS   | myristoylated alanine rich protein kinase C substrate [Source:HGNC Symbol;Acc:HGNC:6759]          |
| EFL1     | elongation factor like GTPase 1 [Source:HGNC Symbol;Acc:HGNC:25789]                               |
| SEL1L3   | SEL1L family member 3 [Source:HGNC Symbol;Acc:HGNC:29108]                                         |
| RASSF2   | Ras association domain family member 2 [Source:HGNC Symbol;Acc:HGNC:9883]                         |
| MS4A7    | membrane spanning 4-domains A7 [Source:HGNC Symbol;Acc:HGNC:13378]                                |
| MFAP4    | microfibrillar associated protein 4 [Source:HGNC Symbol;Acc:HGNC:7035]                            |
| MTSS1L   | metastasis suppressor 1-like [Source:HGNC Symbol;Acc:HGNC:25094]                                  |
| ST3GAL4  | ST3 beta-galactoside alpha-2,3-sialyltransferase 4 [Source:HGNC Symbol;Acc:HGNC:10864]            |
| SCPEP1   | serine carboxypeptidase 1 [Source:HGNC Symbol;Acc:HGNC:29507]                                     |
| ARHGEF40 | Rho guanine nucleotide exchange factor 40 [Source:HGNC Symbol;Acc:HGNC:25516]                     |
| CST7     | cystatin F [Source:HGNC Symbol;Acc:HGNC:2479]                                                     |
| BIN1     | bridging integrator 1 [Source:HGNC Symbol;Acc:HGNC:1052]                                          |
| CKAP4    | cytoskeleton-associated protein 4 [Source:HGNC Symbol;Acc:HGNC:16991]                             |
| BEX1     | brain expressed X-linked 1 [Source:HGNC Symbol;Acc:HGNC:1036]                                     |
| UGT3A2   | UDP glycosyltransferase family 3 member A2 [Source:HGNC Symbol;Acc:HGNC:27266]                    |
| DENND6B  | DENN domain containing 6B [Source:HGNC Symbol;Acc:HGNC:32690]                                     |
| SSBP3    | single stranded DNA binding protein 3 [Source:HGNC Symbol;Acc:HGNC:15674]                         |
| MLC1     | megaloencephalic leukoencephalopathy with subcortical cysts 1 [Source:HGNC Symbol;Acc:HGNC:17082] |
| VAT1L    | vesicle amine transport 1-like [Source:HGNC Symbol;Acc:HGNC:29315]                                |
| ADGRG5   | adhesion G protein-coupled receptor G5 [Source:HGNC Symbol;Acc:HGNC:19010]                        |
| HSH2D    | hematopoietic SH2 domain containing [Source:HGNC Symbol;Acc:HGNC:24920]                           |
| DDAH2    | dimethylarginine dimethylaminohydrolase 2 [Source:HGNC Symbol;Acc:HGNC:2716]                      |
| FAM117A  | family with sequence similarity 117 member A [Source:HGNC Symbol;Acc:HGNC:24179]                  |
| TFAP2C   | transcription factor AP-2 gamma [Source:HGNC Symbol;Acc:HGNC:11744]                               |
| TBX15    | T-box 15 [Source:HGNC Symbol;Acc:HGNC:11594]                                                      |
| POU4F1   | POU class 4 homeobox 1 [Source:HGNC Symbol;Acc:HGNC:9218]                                         |
| ESRRA    | estrogen related receptor alpha [Source:HGNC Symbol;Acc:HGNC:3471]                                |
| FOXF2    | forkhead box F2 [Source:HGNC Symbol;Acc:HGNC:3810]                                                |
| MLXIPL   | MLX interacting protein like [Source:HGNC Symbol;Acc:HGNC:12744]                                  |
| EOMES    | eomesodermin [Source:HGNC Symbol;Acc:HGNC:3372]                                                   |
| TBX20    | T-box 20 [Source:HGNC Symbol;Acc:HGNC:11598]                                                      |
| KLF13    | Kruppel like factor 13 [Source:HGNC Symbol;Acc:HGNC:13672]                                        |
| BARX1    | BARX homeobox 1 [Source:HGNC Symbol;Acc:HGNC:955]                                                 |



|         |                                                                                                      |
|---------|------------------------------------------------------------------------------------------------------|
| OSR2    | odd-skipped related transcription factor 2 [Source:HGNC Symbol;Acc:HGNC:15830]                       |
| EBF3    | early B-cell factor 3 [Source:HGNC Symbol;Acc:HGNC:19087]                                            |
| NR1I2   | nuclear receptor subfamily 1 group I member 2 [Source:HGNC Symbol;Acc:HGNC:7968]                     |
| TBX4    | T-box 4 [Source:HGNC Symbol;Acc:HGNC:11603]                                                          |
| JDP2    | Jun dimerization protein 2 [Source:HGNC Symbol;Acc:HGNC:17546]                                       |
| ZNF41   | zinc finger protein 41 [Source:HGNC Symbol;Acc:HGNC:13107]                                           |
| LMX1B   | LIM homeobox transcription factor 1 beta [Source:HGNC Symbol;Acc:HGNC:6654]                          |
| ZBTB7A  | zinc finger and BTB domain containing 7A [Source:HGNC Symbol;Acc:HGNC:18078]                         |
| VEZF1   | vascular endothelial zinc finger 1 [Source:HGNC Symbol;Acc:HGNC:12949]                               |
| NR2F6   | nuclear receptor subfamily 2 group F member 6 [Source:HGNC Symbol;Acc:HGNC:7977]                     |
| TBP     | TATA-box binding protein [Source:HGNC Symbol;Acc:HGNC:11588]                                         |
| CUX1    | cut like homeobox 1 [Source:HGNC Symbol;Acc:HGNC:2557]                                               |
| CENPB   | centromere protein B [Source:HGNC Symbol;Acc:HGNC:1852]                                              |
| MS4A14  | membrane spanning 4-domains A14 [Source:HGNC Symbol;Acc:HGNC:30706]                                  |
| MS4A4A  | membrane spanning 4-domains A4A [Source:HGNC Symbol;Acc:HGNC:13371]                                  |
| TERF2IP | TERF2 interacting protein [Source:HGNC Symbol;Acc:HGNC:19246]                                        |
| GJA8    | gap junction protein alpha 8 [Source:HGNC Symbol;Acc:HGNC:4281]                                      |
| PTGDR   | prostaglandin D2 receptor (DP) [Source:HGNC Symbol;Acc:HGNC:9591]                                    |
| PTGDR2  | prostaglandin D2 receptor 2 [Source:HGNC Symbol;Acc:HGNC:4502]                                       |
| NTN1    | netrin 1 [Source:HGNC Symbol;Acc:HGNC:8029]                                                          |
| NTN3    | netrin 3 [Source:HGNC Symbol;Acc:HGNC:8030]                                                          |
| NTN4    | netrin 4 [Source:HGNC Symbol;Acc:HGNC:13658]                                                         |
| TRPC3   | transient receptor potential cation channel subfamily C member 3 [Source:HGNC Symbol;Acc:HGNC:12335] |
| TRPC4   | transient receptor potential cation channel subfamily C member 4 [Source:HGNC Symbol;Acc:HGNC:12336] |
| TRPC5   | transient receptor potential cation channel subfamily C member 5 [Source:HGNC Symbol;Acc:HGNC:12337] |
| TRPC6   | transient receptor potential cation channel subfamily C member 6 [Source:HGNC Symbol;Acc:HGNC:12338] |
| ABLIM1  | actin binding LIM protein 1 [Source:HGNC Symbol;Acc:HGNC:78]                                         |
| ABLIM3  | actin binding LIM protein family member 3 [Source:HGNC Symbol;Acc:HGNC:29132]                        |
| ABLIM2  | actin binding LIM protein family member 2 [Source:HGNC Symbol;Acc:HGNC:19195]                        |
| UNC5A   | unc-5 netrin receptor A [Source:HGNC Symbol;Acc:HGNC:12567]                                          |
| UNC5B   | unc-5 netrin receptor B [Source:HGNC Symbol;Acc:HGNC:12568]                                          |
| UNC5C   | unc-5 netrin receptor C [Source:HGNC Symbol;Acc:HGNC:12569]                                          |
| UNC5D   | unc-5 netrin receptor D [Source:HGNC Symbol;Acc:HGNC:18634]                                          |
| LRIG2   | leucine rich repeats and immunoglobulin like domains 2 [Source:HGNC Symbol;Acc:HGNC:20889]           |
| EFNB1   | ephrin B1 [Source:HGNC Symbol;Acc:HGNC:3226]                                                         |
| EFNB2   | ephrin B2 [Source:HGNC Symbol;Acc:HGNC:3227]                                                         |
| EFNB3   | ephrin B3 [Source:HGNC Symbol;Acc:HGNC:3228]                                                         |
| EPHA4   | EPH receptor A4 [Source:HGNC Symbol;Acc:HGNC:3388]                                                   |

|        |                                                                                |
|--------|--------------------------------------------------------------------------------|
| EPHA5  | EPH receptor A5 [Source:HGNC Symbol;Acc:HGNC:3389]                             |
| EPHA6  | EPH receptor A6 [Source:HGNC Symbol;Acc:HGNC:19296]                            |
| EPHA7  | EPH receptor A7 [Source:HGNC Symbol;Acc:HGNC:3390]                             |
| EPHA8  | EPH receptor A8 [Source:HGNC Symbol;Acc:HGNC:3391]                             |
| EPHB3  | EPH receptor B3 [Source:HGNC Symbol;Acc:HGNC:3394]                             |
| EPHB6  | EPH receptor B6 [Source:HGNC Symbol;Acc:HGNC:3396]                             |
| NGEF   | neuronal guanine nucleotide exchange factor [Source:HGNC Symbol;Acc:HGNC:7807] |
| RGS3   | regulator of G-protein signaling 3 [Source:HGNC Symbol;Acc:HGNC:9999]          |
| SLIT1  | slit guidance ligand 1 [Source:HGNC Symbol;Acc:HGNC:11085]                     |
| SLIT2  | slit guidance ligand 2 [Source:HGNC Symbol;Acc:HGNC:11086]                     |
| ROBO1  | roundabout guidance receptor 1 [Source:HGNC Symbol;Acc:HGNC:10249]             |
| ROBO2  | roundabout guidance receptor 2 [Source:HGNC Symbol;Acc:HGNC:10250]             |
| ROBO3  | roundabout guidance receptor 3 [Source:HGNC Symbol;Acc:HGNC:13433]             |
| SRGAP2 | SLIT-ROBO Rho GTPase activating protein 2 [Source:HGNC Symbol;Acc:HGNC:19751]  |
| SRGAP1 | SLIT-ROBO Rho GTPase activating protein 1 [Source:HGNC Symbol;Acc:HGNC:17382]  |
| SRGAP3 | SLIT-ROBO Rho GTPase activating protein 3 [Source:HGNC Symbol;Acc:HGNC:19744]  |
| SEMA3A | semaphorin 3A [Source:HGNC Symbol;Acc:HGNC:10723]                              |
| SEMA3C | semaphorin 3C [Source:HGNC Symbol;Acc:HGNC:10725]                              |
| SEMA3D | semaphorin 3D [Source:HGNC Symbol;Acc:HGNC:10726]                              |
| SEMA3E | semaphorin 3E [Source:HGNC Symbol;Acc:HGNC:10727]                              |
| SEMA3F | semaphorin 3F [Source:HGNC Symbol;Acc:HGNC:10728]                              |
| SEMA3G | semaphorin 3G [Source:HGNC Symbol;Acc:HGNC:30400]                              |
| PLXNA2 | plexin A2 [Source:HGNC Symbol;Acc:HGNC:9100]                                   |
| PLXNA3 | plexin A3 [Source:HGNC Symbol;Acc:HGNC:9101]                                   |
| PLXNA1 | plexin A1 [Source:HGNC Symbol;Acc:HGNC:9099]                                   |
| PLXNA4 | plexin A4 [Source:HGNC Symbol;Acc:HGNC:9102]                                   |
| RHOD   | ras homolog family member D [Source:HGNC Symbol;Acc:HGNC:670]                  |
| RND1   | Rho family GTPase 1 [Source:HGNC Symbol;Acc:HGNC:18314]                        |
| FES    | FES proto-oncogene, tyrosine kinase [Source:HGNC Symbol;Acc:HGNC:3657]         |
| DPYSL5 | dihydropyrimidinase like 5 [Source:HGNC Symbol;Acc:HGNC:20637]                 |
| DPYSL2 | dihydropyrimidinase like 2 [Source:HGNC Symbol;Acc:HGNC:3014]                  |
| SEMA4F | ssemaphorin 4F [Source:HGNC Symbol;Acc:HGNC:10734]                             |
| SEMA4B | semaphorin 4B [Source:HGNC Symbol;Acc:HGNC:10730]                              |
| SEMA4C | semaphorin 4C [Source:HGNC Symbol;Acc:HGNC:10731]                              |
| SEMA4G | semaphorin 4G [Source:HGNC Symbol;Acc:HGNC:10735]                              |
| SEMA4A | semaphorin 4A [Source:HGNC Symbol;Acc:HGNC:10729]                              |
| SEMA5A | semaphorin 5A [Source:HGNC Symbol;Acc:HGNC:10736]                              |
| SEMA5B | semaphorin 5B [Source:HGNC Symbol;Acc:HGNC:10737]                              |
| SEMA6A | semaphorin 6A [Source:HGNC Symbol;Acc:HGNC:10738]                              |
| SEMA6C | semaphorin 6C [Source:HGNC Symbol;Acc:HGNC:10740]                              |
| SEMA6D | semaphorin 6D [Source:HGNC Symbol;Acc:HGNC:16770]                              |

|         |                                                                                                |
|---------|------------------------------------------------------------------------------------------------|
| PLXNB1  | plexin B1 [Source:HGNC Symbol;Acc:HGNC:9103]                                                   |
| PLXNB2  | plexin B2 [Source:HGNC Symbol;Acc:HGNC:9104]                                                   |
| PLXNB3  | plexin B3 [Source:HGNC Symbol;Acc:HGNC:9105]                                                   |
| SEMA7A  | semaphorin 7A (John Milton Hagen blood group) [Source:HGNC Symbol;Acc:HGNC:10741]              |
| PLXNC1  | plexin C1 [Source:HGNC Symbol;Acc:HGNC:9106]                                                   |
| PTGIR   | prostaglandin I2 (prostacyclin) receptor (IP) [Source:HGNC Symbol;Acc:HGNC:9602]               |
| SLCO2A1 | solute carrier organic anion transporter family member 2A1 [Source:HGNC Symbol;Acc:HGNC:10955] |
| KDM6B   | lysine demethylase 6B [Source:HGNC Symbol;Acc:HGNC:29012]                                      |
| KDM1A   | lysine demethylase 1A [Source:HGNC Symbol;Acc:HGNC:29079]                                      |
| KDM1B   | lysine demethylase 1B [Source:HGNC Symbol;Acc:HGNC:21577]                                      |
| NR3C1   | nuclear receptor subfamily 3 group C member 1 [Source:HGNC Symbol;Acc:HGNC:7978]               |
| CYP26B1 | cytochrome P450 family 26 subfamily B member 1 [Source:HGNC Symbol;Acc:HGNC:20581]             |
| STRA8   | stimulated by retinoic acid 8 [Source:HGNC Symbol;Acc:HGNC:30653]                              |
| PDE6A   | phosphodiesterase 6A [Source:HGNC Symbol;Acc:HGNC:8785]                                        |
| GUCY2F  | guanylate cyclase 2F, retinal [Source:HGNC Symbol;Acc:HGNC:4691]                               |
| PDE6B   | phosphodiesterase 6B [Source:HGNC Symbol;Acc:HGNC:8786]                                        |
| PDE6G   | phosphodiesterase 6G [Source:HGNC Symbol;Acc:HGNC:8789]                                        |
| RCVRN   | recoverin [Source:HGNC Symbol;Acc:HGNC:9937]                                                   |
| RGS9    | regulator of G-protein signaling 9 [Source:HGNC Symbol;Acc:HGNC:10004]                         |
| SAG     | S-antigen; retina and pineal gland (arrestin) [Source:HGNC Symbol;Acc:HGNC:10521]              |
| GNAT1   | G protein subunit alpha transducin 1 [Source:HGNC Symbol;Acc:HGNC:4393]                        |
| PICALM  | phosphatidylinositol binding clathrin assembly protein [Source:HGNC Symbol;Acc:HGNC:15514]     |
| GUCY2D  | guanylate cyclase 2D, retinal [Source:HGNC Symbol;Acc:HGNC:4689]                               |
| OPRM1   | opioid receptor mu 1 [Source:HGNC Symbol;Acc:HGNC:8156]                                        |
| GPBR1   | G protein-coupled estrogen receptor 1 [Source:HGNC Symbol;Acc:HGNC:4485]                       |
| KCNJ3   | potassium voltage-gated channel subfamily J member 3 [Source:HGNC Symbol;Acc:HGNC:6264]        |
| KCNJ6   | potassium voltage-gated channel subfamily J member 6 [Source:HGNC Symbol;Acc:HGNC:6267]        |
| KCNJ9   | potassium voltage-gated channel subfamily J member 9 [Source:HGNC Symbol;Acc:HGNC:6270]        |
| KRT1    | keratin 1 [Source:HGNC Symbol;Acc:HGNC:6412]                                                   |
| PGR     | progesterone receptor [Source:HGNC Symbol;Acc:HGNC:8910]                                       |
| EBAG9   | estrogen receptor binding site associated, antigen, 9 [Source:HGNC Symbol;Acc:HGNC:3123]       |
| TFF1    | trefoil factor 1 [Source:HGNC Symbol;Acc:HGNC:11755]                                           |
| FKBP5   | FK506 binding protein 5 [Source:HGNC Symbol;Acc:HGNC:3721]                                     |
| FKBP4   | FK506 binding protein 4 [Source:HGNC Symbol;Acc:HGNC:3720]                                     |
| GABBR1  | gamma-aminobutyric acid type B receptor subunit 1 [Source:HGNC Symbol;Acc:HGNC:4070]           |
| GABBR2  | gamma-aminobutyric acid type B receptor subunit 2 [Source:HGNC Symbol;Acc:HGNC:4507]           |
| F2RL1   | F2R like trypsin receptor 1 [Source:HGNC Symbol;Acc:HGNC:3538]                                 |
| ASIC2   | acid sensing ion channel subunit 2 [Source:HGNC Symbol;Acc:HGNC:99]                            |
| ASIC1   | acid sensing ion channel subunit 1 [Source:HGNC Symbol;Acc:HGNC:100]                           |
| ASIC3   | acid sensing ion channel subunit 3 [Source:HGNC Symbol;Acc:HGNC:101]                           |
| ASIC4   | acid sensing ion channel subunit family member 4 [Source:HGNC Symbol;Acc:HGNC:21263]           |

|       |                                                                                                      |
|-------|------------------------------------------------------------------------------------------------------|
| ASIC5 | acid sensing ion channel subunit family member 5 [Source:HGNC Symbol;Acc:HGNC:17537]                 |
| TRPV3 | transient receptor potential cation channel subfamily V member 3 [Source:HGNC Symbol;Acc:HGNC:18084] |
| TRPM8 | transient receptor potential cation channel subfamily M member 8 [Source:HGNC Symbol;Acc:HGNC:17961] |
| TRPA1 | transient receptor potential cation channel subfamily A member 1 [Source:HGNC Symbol;Acc:HGNC:497]   |
| TRPV1 | transient receptor potential cation channel subfamily V member 1 [Source:HGNC Symbol;Acc:HGNC:12716] |
| PRKCH | protein kinase C eta [Source:HGNC Symbol;Acc:HGNC:9403]                                              |
| ABCF1 | ATP binding cassette subfamily F member 1 [Source:HGNC Symbol;Acc:HGNC:70]                           |

| Supplementary Table S4: Topological network analysis related to nAMD disease |                   |                   |                    |                 |                       |                      |                       |
|------------------------------------------------------------------------------|-------------------|-------------------|--------------------|-----------------|-----------------------|----------------------|-----------------------|
| Betweenness<br>unDir                                                         | Bridging<br>unDir | Centroid<br>unDir | Closeness<br>unDir | Degree<br>unDir | Eccentricity<br>unDir | EigenVector<br>unDir | gene name             |
| 0                                                                            | 0                 | 0                 | 0                  | 0               | 0                     | 0                    | PLET1                 |
| 0                                                                            | 0                 | 0                 | 0                  | 0               | 0                     | 0                    | NPIPA2                |
| 0                                                                            | 0                 | 0                 | 0                  | 0               | 0                     | 0                    | ARMS2                 |
| 0                                                                            | 0                 | 0                 | 0                  | 0               | 0                     | 0                    | NPIPA3                |
| 0                                                                            | 0                 | 0                 | 0                  | 0               | 0                     | 0                    | CCDC175               |
| 0                                                                            | 0                 | 0                 | 0                  | 0               | 0                     | 0                    | XKR9                  |
| 0                                                                            | 0                 | 0                 | 0                  | 0               | 0                     | 0                    | MTRNR2L13             |
| 0                                                                            | 0                 | 0                 | 0                  | 0               | 0                     | 0                    | C11orf91              |
| 0                                                                            | 0                 | 0                 | 0                  | 0               | 0                     | 0                    | ARL14EPL              |
| 0                                                                            | 0                 | 0                 | 0                  | 0               | 0                     | 0                    | GAGE12B               |
| 0                                                                            | 0                 | -7068             | 4.84E-05           | 1               | 0.25                  | 1.06E-05             | ATP5L2                |
| 0.422064                                                                     | 3.270977          | -7068             | 5.81E-05           | 9               | 0.25                  | 1.15E-04             | CBSL                  |
| 0                                                                            | 0                 | -7068             | 4.97E-05           | 2               | 0.25                  | 2.22E-05             | MPC1L                 |
| 0                                                                            | 0                 | -7068             | 4.83E-05           | 1               | 0.25                  | 1.06E-05             | UQCRHL                |
| 0                                                                            | 0                 | -7068             | 5.09E-05           | 3               | 0.25                  | 3.23E-05             | MAGEB16               |
| 0                                                                            | 0                 | -7068             | 6.31E-05           | 21              | 0.25                  | 2.99E-04             | HMSD                  |
| 0                                                                            | 0                 | -7068             | 4.79E-05           | 1               | 0.25                  | 7.37E-06             | NBPF6                 |
| 3.89924                                                                      | 2.111259          | -7068             | 6.36E-05           | 27              | 0.25                  | 2.44E-04             | NKX2-4                |
| 0.060427                                                                     | 0.082591          | -7068             | 6.27E-05           | 18              | 0.25                  | 2.08E-04             | SULT6B1               |
| 0                                                                            | 0                 | -7068             | 4.78E-05           | 2               | 0.25                  | 4.07E-06             | KRTAP10-6             |
| 2.876746                                                                     | 2.035024          | -7068             | 6.40E-05           | 25              | 0.25                  | 2.86E-04             | ARGFX                 |
| 14.19459                                                                     | 3.252732          | -7068             | 6.61E-05           | 48              | 0.25                  | 5.05E-04             | XXbac-<br>BPG116M5.17 |
| 29.85258                                                                     | 9.268707          | -7068             | 6.68E-05           | 39              | 0.25                  | 4.13E-04             | RP11-330H6.5          |
| 51.8231                                                                      | 6.739027          | -7068             | 6.83E-05           | 62              | 0.25                  | 6.94E-04             | XXbac-<br>BPG246D15.9 |
| 0.144661                                                                     | 0.232833          | -7068             | 5.81E-05           | 11              | 0.25                  | 1.18E-04             | TBC1D3I               |
| 0                                                                            | 0                 | -7068             | 4.76E-05           | 3               | 0.25                  | 3.70E-06             | SPDYE5                |
| 0                                                                            | 0                 | -7068             | 4.64E-05           | 2               | 0.25                  | 6.54E-07             | PRAMEF5               |
| 15.94021                                                                     | 10.87097          | -7068             | 6.45E-05           | 26              | 0.25                  | 3.06E-04             | RP11-566K11.2         |
| 0                                                                            | 0                 | -7068             | 6.03E-05           | 23              | 0.25                  | 1.75E-04             | OPN1MW3               |
| 0                                                                            | 0                 | -7068             | 5.29E-05           | 29              | 0.25                  | 5.45E-05             | OR8B3                 |
| 0                                                                            | 0                 | -7068             | 5.29E-05           | 29              | 0.25                  | 5.45E-05             | OR4F16                |
| 0                                                                            | 0                 | -7068             | 4.94E-05           | 3               | 0.25                  | 1.81E-05             | GAGE12G               |
| 0                                                                            | 0                 | -7068             | 4.94E-05           | 3               | 0.25                  | 1.81E-05             | GAGE12J               |
| 0                                                                            | 0                 | -1                | 1                  | 1               | 1                     | -5.71E-38            | FRG2C                 |
| 0                                                                            | 0                 | -1                | 1                  | 1               | 1                     | 1.37E-37             | FRG2B                 |
| 0                                                                            | 0                 | -7068             | 4.99E-05           | 5               | 0.25                  | 2.37E-05             | CT45A2                |
| 0                                                                            | 0                 | -7068             | 4.99E-05           | 5               | 0.25                  | 2.37E-05             | CT45A6                |

|          |          |       |          |     |          |          |               |
|----------|----------|-------|----------|-----|----------|----------|---------------|
| 11.34631 | 1.284786 | -7068 | 6.86E-05 | 55  | 0.25     | 7.24E-04 | HES3          |
| 0        | 0        | -7068 | 6.21E-05 | 24  | 0.25     | 2.30E-04 | FABP9         |
| 1.711409 | 0.65972  | -7068 | 6.25E-05 | 25  | 0.25     | 2.36E-04 | LCN9          |
| 0.558884 | 1.234766 | -7068 | 6.64E-05 | 15  | 0.25     | 2.34E-04 | FER1L6        |
| 0.99207  | 1.728618 | -7068 | 6.73E-05 | 18  | 0.25     | 2.90E-04 | SYNJ2BP-COX16 |
| 0        | 0        | -7068 | 6.05E-05 | 2   | 0.25     | 7.48E-05 | FAM72D        |
| 25.68782 | 10.39498 | -7068 | 5.22E-05 | 6   | 0.25     | 4.53E-05 | CT45A3        |
| 3.376956 | 2.24473  | -7068 | 6.14E-05 | 3   | 0.25     | 8.86E-05 | FAM72A        |
| 298.1002 | 5.830237 | -7068 | 7.01E-05 | 143 | 0.25     | 0.001283 | ZNF774        |
| 0.347207 | 8.288332 | -7068 | 5.47E-05 | 5   | 0.25     | 6.47E-05 | CCDC103       |
| 7.372626 | 0.142835 | -7068 | 6.81E-05 | 125 | 0.333333 | 4.58E-04 | ZNF816        |
| 2124.667 | 1350.073 | -7068 | 6.06E-05 | 3   | 0.25     | 7.53E-05 | PRAMEF14      |
| 3.338812 | 0.274585 | -7068 | 7.01E-05 | 79  | 0.333333 | 0.001052 | ZNF286B       |
| 3.361538 | 3.212917 | -7068 | 6.74E-05 | 22  | 0.25     | 3.15E-04 | PPP1R42       |
| 0.256778 | 1.527373 | -7068 | 6.51E-05 | 11  | 0.333333 | 1.93E-04 | PGAM4         |
| 8.8684   | 2.832745 | -7068 | 6.57E-05 | 33  | 0.25     | 3.63E-04 | AGAP4         |
| 7.217815 | 2.433165 | -7068 | 6.55E-05 | 32  | 0.25     | 3.49E-04 | AGAP5         |
| 0        | 0        | -7068 | 5.23E-05 | 20  | 0.25     | 5.39E-05 | UGT1A3        |
| 0        | 0        | -7068 | 5.23E-05 | 20  | 0.25     | 5.39E-05 | UGT1A9        |
| 17.43957 | 3.057227 | -7068 | 5.51E-05 | 18  | 0.25     | 8.41E-05 | UGT1A7        |
| 0.033408 | 5.318025 | -7068 | 5.04E-05 | 2   | 0.25     | 2.62E-05 | CDRT4         |
| 2.44733  | 5.117225 | -7068 | 5.95E-05 | 15  | 0.25     | 1.66E-04 | HIST2H3PS2    |
| 0.015873 | 2.078055 | -7068 | 5.48E-05 | 3   | 0.25     | 7.26E-05 | SLFN12L       |
| 1.532176 | 2.939222 | -7068 | 6.62E-05 | 16  | 0.25     | 2.63E-04 | KBTBD13       |
| 0.006711 | 2.346643 | -7068 | 5.25E-05 | 2   | 0.25     | 4.67E-05 | NPIP3         |
| 12.92875 | 1.428447 | -7068 | 6.87E-05 | 56  | 0.25     | 7.48E-04 | SCX           |
| 2.578124 | 0.664229 | -7068 | 6.60E-05 | 34  | 0.25     | 3.89E-04 | HELT          |
| 2.574998 | 2.449998 | -7068 | 6.65E-05 | 27  | 0.25     | 4.19E-04 | KPNA7         |
| 1.079224 | 4.39136  | -7068 | 6.55E-05 | 12  | 0.333333 | 2.38E-04 | MZT2A         |
| 184.2197 | 5.619463 | -7068 | 6.97E-05 | 105 | 0.333333 | 0.001098 | GPR21         |
| 14.0439  | 7.891421 | -7068 | 6.63E-05 | 31  | 0.25     | 4.33E-04 | USP50         |
| 16.5118  | 1.180955 | -7068 | 5.48E-05 | 30  | 0.25     | 7.34E-05 | OR4F21        |
| 25.56095 | 1.76106  | -7068 | 5.61E-05 | 31  | 0.25     | 8.71E-05 | OR2T34        |
| 25.56095 | 1.76106  | -7068 | 5.61E-05 | 31  | 0.25     | 8.71E-05 | OR2AT4        |
| 25.56095 | 1.76106  | -7068 | 5.61E-05 | 31  | 0.25     | 8.71E-05 | OR1L8         |
| 25.56095 | 1.76106  | -7068 | 5.61E-05 | 31  | 0.25     | 8.71E-05 | OR2T3         |
| 9.040928 | 0.646326 | -7068 | 5.45E-05 | 30  | 0.25     | 6.82E-05 | OR6C75        |
| 9.040928 | 0.646326 | -7068 | 5.45E-05 | 30  | 0.25     | 6.82E-05 | OR6S1         |
| 9.040928 | 0.646326 | -7068 | 5.45E-05 | 30  | 0.25     | 6.82E-05 | OR8J3         |
| 206.1147 | 18.23558 | -7068 | 6.42E-05 | 30  | 0.25     | 2.66E-04 | UGT1A10       |
| 2.531606 | 3.625075 | -7068 | 6.07E-05 | 19  | 0.25     | 2.13E-04 | MT-CYB        |

|          |          |       |          |     |          |          |          |
|----------|----------|-------|----------|-----|----------|----------|----------|
| 3.612852 | 2.258594 | -7068 | 6.33E-05 | 23  | 0.25     | 2.97E-04 | MT-CO3   |
| 24.35464 | 2.354276 | -7068 | 6.50E-05 | 50  | 0.25     | 4.03E-04 | MT-ND5   |
| 5.35651  | 0.964575 | -7068 | 6.21E-05 | 35  | 0.25     | 3.14E-04 | MT-ND4L  |
| 0        | 0        | -7068 | 6.13E-05 | 34  | 0.25     | 2.99E-04 | MT-ND1   |
| 0        | 0        | -7068 | 6.13E-05 | 34  | 0.25     | 2.99E-04 | MT-ND3   |
| 53.64532 | 5.777051 | -7068 | 6.98E-05 | 78  | 0.333333 | 0.001067 | GRK1     |
| 2076.119 | 50.28496 | -7068 | 6.98E-05 | 77  | 0.333333 | 9.59E-04 | OR5B3    |
| 9.200289 | 5.605351 | -7068 | 6.95E-05 | 38  | 0.333333 | 6.74E-04 | GPR179   |
| 71.06972 | 7.154139 | -7068 | 7.05E-05 | 89  | 0.333333 | 0.001518 | CERKL    |
| 275.0484 | 9.504399 | -7068 | 7.08E-05 | 135 | 0.333333 | 0.002031 | TMIGD1   |
| 438.5931 | 6.832813 | -7068 | 7.16E-05 | 226 | 0.333333 | 0.00378  | HRNR     |
| 195.0854 | 8.040193 | -7068 | 7.06E-05 | 118 | 0.333333 | 0.00211  | SYT15    |
| 386.9249 | 7.021768 | -7068 | 7.13E-05 | 202 | 0.333333 | 0.003426 | GDF1     |
| 21.95245 | 10.59598 | -7068 | 6.80E-05 | 35  | 0.25     | 5.10E-04 | INCA1    |
| 2378.096 | 50.31453 | -7068 | 7.01E-05 | 85  | 0.333333 | 0.001008 | OR4X1    |
| 2494.72  | 5.976816 | -7068 | 7.37E-05 | 607 | 0.333333 | 0.010706 | ITCH     |
| 330.5595 | 6.851175 | -7068 | 7.13E-05 | 197 | 0.333333 | 0.003373 | SP110    |
| 1196.585 | 39.27573 | -7068 | 6.75E-05 | 58  | 0.333333 | 4.89E-04 | OR4Q3    |
| 2612.048 | 6.796457 | -7068 | 7.34E-05 | 562 | 0.333333 | 0.00942  | ATG5     |
| 175.3925 | 8.812308 | -7068 | 7.04E-05 | 107 | 0.25     | 0.001435 | KIR3DL1  |
| 4970.29  | 6.533477 | -7068 | 7.49E-05 | 807 | 0.333333 | 0.014277 | SHTN1    |
| 966.442  | 6.568944 | -7068 | 7.23E-05 | 353 | 0.333333 | 0.006108 | FGF13    |
| 15975    | 48.56064 | -7068 | 7.24E-05 | 371 | 0.333333 | 0.006109 | OR2Y1    |
| 309.0818 | 7.896675 | -7068 | 7.12E-05 | 172 | 0.333333 | 0.002907 | LGALS7   |
| 1968.594 | 6.452741 | -7068 | 7.31E-05 | 505 | 0.333333 | 0.008368 | LIMS1    |
| 299.8375 | 7.042872 | -7068 | 7.13E-05 | 188 | 0.333333 | 0.003265 | PI4K2B   |
| 54.93278 | 6.229445 | -7068 | 7.04E-05 | 88  | 0.333333 | 0.001539 | TINCR    |
| 3705.381 | 7.08263  | -7068 | 7.39E-05 | 648 | 0.333333 | 0.011102 | ASPH     |
| 1358.481 | 6.393515 | -7068 | 7.27E-05 | 429 | 0.25     | 0.007557 | ANXA8    |
| 770.7453 | 7.245045 | -7068 | 7.19E-05 | 293 | 0.333333 | 0.004972 | PRR20A   |
| 4338.352 | 9.519032 | -7068 | 7.35E-05 | 562 | 0.333333 | 0.009602 | TBC1D3   |
| 99.15024 | 8.357576 | -7068 | 7.05E-05 | 87  | 0.333333 | 0.001446 | SLC22A17 |
| 5772.995 | 56.78734 | -7068 | 7.10E-05 | 158 | 0.333333 | 0.002299 | OR1J1    |
| 261.8053 | 6.23125  | -7068 | 7.12E-05 | 192 | 0.333333 | 0.003432 | FAM177B  |
| 1412.21  | 7.913186 | -7068 | 7.23E-05 | 352 | 0.333333 | 0.005875 | SYT14    |
| 2925.07  | 7.332279 | -7068 | 7.35E-05 | 559 | 0.333333 | 0.009161 | OSTN     |
| 39.58778 | 8.270222 | -7068 | 6.92E-05 | 57  | 0.25     | 8.67E-04 | EPGN     |
| 3073.492 | 6.948716 | -7068 | 7.36E-05 | 597 | 0.333333 | 0.010292 | OCM      |
| 689.093  | 8.317366 | -7068 | 7.16E-05 | 245 | 0.25     | 0.004048 | VSX2     |
| 248.6318 | 8.047341 | -7068 | 7.08E-05 | 147 | 0.25     | 0.002398 | SAMD1    |
| 17960.33 | 45.65369 | -7068 | 7.26E-05 | 415 | 0.333333 | 0.006853 | OR5AN1   |

|          |          |       |          |     |          |          |          |
|----------|----------|-------|----------|-----|----------|----------|----------|
| 967.5766 | 6.520672 | -7068 | 7.24E-05 | 356 | 0.25     | 0.006207 | LRIT3    |
| 507.3977 | 7.249187 | -7068 | 7.15E-05 | 235 | 0.25     | 0.003924 | CD200R1L |
| 166.9119 | 6.514085 | -7068 | 7.09E-05 | 146 | 0.25     | 0.00242  | APOC2    |
| 210.6329 | 6.407555 | -7068 | 7.11E-05 | 167 | 0.333333 | 0.002969 | TMEM189  |
| 1105.921 | 6.969024 | -7068 | 7.22E-05 | 361 | 0.333333 | 0.006174 | TJP2     |
| 618.0642 | 7.83994  | -7068 | 7.15E-05 | 239 | 0.333333 | 0.003693 | HLA-DQA1 |
| 157.281  | 7.779296 | -7068 | 7.06E-05 | 119 | 0.25     | 0.001773 | BFSP1    |
| 799.1741 | 7.547658 | -7068 | 7.17E-05 | 274 | 0.333333 | 0.004167 | CALM2    |
| 2009.595 | 6.448639 | -7068 | 7.32E-05 | 517 | 0.333333 | 0.008952 | ENTPD1   |
| 5161.72  | 6.583788 | -7068 | 7.48E-05 | 814 | 0.333333 | 0.013733 | GSN      |
| 3291.777 | 7.394603 | -7068 | 7.35E-05 | 584 | 0.25     | 0.009612 | AMY1A    |
| 3.561178 | 6.328823 | -7068 | 6.05E-05 | 17  | 0.25     | 1.67E-04 | PRY      |
| 241.9272 | 8.806639 | -7068 | 7.08E-05 | 133 | 0.333333 | 0.001831 | AMY2A    |
| 1315.899 | 7.786385 | -7068 | 7.21E-05 | 353 | 0.25     | 0.005512 | C4A      |
| 828.585  | 8.040042 | -7068 | 7.18E-05 | 275 | 0.333333 | 0.004343 | GANC     |
| 5.906222 | 8.473852 | -7068 | 6.14E-05 | 18  | 0.333333 | 1.66E-04 | NUDT17   |
| 283.95   | 13.12915 | -7068 | 6.97E-05 | 86  | 0.25     | 0.001061 | MT-ND6   |
| 6079.618 | 7.249118 | -7068 | 7.49E-05 | 821 | 0.333333 | 0.013844 | NAALADL2 |
| 60.0001  | 4.70605  | -7068 | 6.92E-05 | 68  | 0.25     | 8.55E-04 | TCF24    |
| 4187.285 | 6.765228 | -7068 | 7.44E-05 | 719 | 0.333333 | 0.012611 | PTCHD4   |
| 5936.553 | 7.403324 | -7068 | 7.49E-05 | 803 | 0.333333 | 0.013732 | ILDR2    |
| 15624.14 | 27.61397 | -7068 | 7.24E-05 | 376 | 0.333333 | 0.006295 | NBPF4    |
| 1846.695 | 7.028857 | -7068 | 7.29E-05 | 463 | 0.333333 | 0.007896 | KCNT2    |
| 853.3065 | 8.646166 | -7068 | 7.18E-05 | 262 | 0.333333 | 0.004164 | SYPL2    |
| 281.1494 | 8.985286 | -7068 | 7.05E-05 | 123 | 0.333333 | 0.001463 | SP6      |
| 29.78079 | 13.03601 | -7068 | 6.65E-05 | 33  | 0.25     | 3.42E-04 | IRGM     |
| 8329.231 | 57.63604 | -7068 | 7.10E-05 | 150 | 0.25     | 0.001786 | KRTAP5-2 |
| 208.4232 | 6.563666 | -7068 | 7.11E-05 | 159 | 0.333333 | 0.002743 | VANGL2   |
| 204.4172 | 8.852742 | -7068 | 7.05E-05 | 121 | 0.25     | 0.001705 | C8orf82  |
| 474.118  | 17.22841 | -7068 | 6.31E-05 | 51  | 0.333333 | 2.25E-04 | OR52D1   |
| 5950.017 | 54.13695 | -7068 | 7.11E-05 | 163 | 0.333333 | 0.002266 | OR8B2    |
| 387.601  | 11.33052 | -7068 | 7.10E-05 | 142 | 0.333333 | 0.002319 | ATP6V1E2 |
| 420.0357 | 9.849306 | -7068 | 7.08E-05 | 138 | 0.333333 | 0.001905 | PPP1R27  |
| 216.8794 | 7.604128 | -7068 | 7.07E-05 | 137 | 0.333333 | 0.001774 | TTC36    |
| 7.892079 | 10.38648 | -7068 | 5.83E-05 | 15  | 0.25     | 1.21E-04 | C2orf71  |
| 81.09107 | 6.787382 | -7068 | 6.97E-05 | 84  | 0.25     | 0.001114 | SRL      |
| 5.117996 | 6.941845 | -7068 | 5.90E-05 | 17  | 0.25     | 1.39E-04 | DEFB108B |
| 847.7078 | 15.01881 | -7068 | 6.89E-05 | 84  | 0.25     | 7.88E-04 | UGT1A1   |
| 73.86677 | 13.19224 | -7068 | 6.75E-05 | 45  | 0.25     | 4.13E-04 | BTBD17   |
| 152.0138 | 6.35893  | -7068 | 7.01E-05 | 116 | 0.25     | 0.001708 | LRRN4CL  |
| 88.79086 | 4.932558 | -7068 | 6.99E-05 | 97  | 0.25     | 0.001103 | CYSRT1   |



|          |          |       |          |      |          |          |          |
|----------|----------|-------|----------|------|----------|----------|----------|
| 126.6058 | 5.37856  | -7068 | 7.05E-05 | 112  | 0.333333 | 0.001372 | KRT78    |
| 269.7365 | 8.822456 | -7068 | 6.96E-05 | 90   | 0.25     | 9.54E-04 | MT-ND4   |
| 134.154  | 8.566897 | -7068 | 6.97E-05 | 72   | 0.25     | 9.70E-04 | MT-CO2   |
| 314.0838 | 10.42404 | -7068 | 7.00E-05 | 88   | 0.25     | 9.96E-04 | MT-ND2   |
| 152.47   | 7.710524 | -7068 | 6.89E-05 | 63   | 0.25     | 7.58E-04 | MT-CO1   |
| 42.21674 | 6.261667 | -7068 | 6.92E-05 | 52   | 0.333333 | 6.97E-04 | MT-ATP6  |
| 31.62677 | 11.67661 | -7068 | 6.16E-05 | 22   | 0.25     | 1.87E-04 | COX8C    |
| 38.36342 | 17.04477 | -7068 | 6.78E-05 | 26   | 0.25     | 3.76E-04 | FBXO43   |
| 222.704  | 3.430206 | -7068 | 6.88E-05 | 144  | 0.333333 | 5.92E-04 | ZNF316   |
| 163.8689 | 2.278439 | -7068 | 6.85E-05 | 154  | 0.25     | 7.44E-04 | ZNF805   |
| 1605.254 | 6.579695 | -7068 | 7.27E-05 | 450  | 0.333333 | 0.007655 | RSBN1L   |
| 2723.329 | 5.851032 | -7068 | 7.34E-05 | 610  | 0.333333 | 0.00914  | PGBD5    |
| 1309.657 | 8.706293 | -7068 | 7.22E-05 | 328  | 0.333333 | 0.004824 | C19orf54 |
| 472.2899 | 9.02444  | -7068 | 7.11E-05 | 176  | 0.333333 | 0.002169 | CST4     |
| 605.2255 | 8.698003 | -7068 | 7.11E-05 | 190  | 0.333333 | 0.00211  | KIR2DL3  |
| 376.8712 | 6.199996 | -7068 | 7.11E-05 | 209  | 0.25     | 0.002889 | MT1HL1   |
| 2020.111 | 8.500328 | -7068 | 7.24E-05 | 398  | 0.333333 | 0.005572 | FCGR1A   |
| 875.08   | 7.315356 | -7068 | 7.21E-05 | 312  | 0.333333 | 0.004864 | YIF1B    |
| 6037.965 | 7.175458 | -7068 | 7.48E-05 | 811  | 0.333333 | 0.01336  | SNX25    |
| 1183.048 | 10.85769 | -7068 | 7.17E-05 | 258  | 0.333333 | 0.003403 | KANSL3   |
| 1002.493 | 7.478439 | -7068 | 7.19E-05 | 314  | 0.333333 | 0.004617 | NLRP12   |
| 3390.059 | 12.38236 | -7068 | 7.22E-05 | 347  | 0.333333 | 0.004097 | GDF2     |
| 731.1187 | 7.348545 | -7068 | 7.18E-05 | 274  | 0.333333 | 0.004179 | AKR1C2   |
| 916.0544 | 7.638474 | -7068 | 7.19E-05 | 302  | 0.333333 | 0.004952 | RSPRY1   |
| 882.5394 | 18.2641  | -7068 | 7.05E-05 | 132  | 0.25     | 0.001079 | SSX3     |
| 93.70651 | 7.622666 | -7068 | 7.00E-05 | 89   | 0.333333 | 0.001198 | IFNA13   |
| 238.0506 | 6.320384 | -7068 | 7.11E-05 | 173  | 0.333333 | 0.002824 | MSH5     |
| 153.0133 | 10.06966 | -7068 | 7.02E-05 | 86   | 0.25     | 0.001189 | SULT1A3  |
| 3956.91  | 9.732289 | -7068 | 7.30E-05 | 486  | 0.333333 | 0.006469 | GRM6     |
| 1588.072 | 10.33844 | -7068 | 7.20E-05 | 299  | 0.333333 | 0.004104 | RNF32    |
| 5348.103 | 8.916797 | -7068 | 7.38E-05 | 643  | 0.333333 | 0.00936  | TRIM16   |
| 11403.37 | 6.867685 | -7068 | 7.65E-05 | 1150 | 0.333333 | 0.01841  | BTF3L4   |
| 1039.497 | 7.511026 | -7068 | 7.21E-05 | 325  | 0.333333 | 0.005394 | ARHGAP8  |
| 76.72704 | 6.883284 | -7068 | 7.01E-05 | 91   | 0.25     | 0.001318 | CKMT1B   |
| 0.942151 | 2.660683 | -7068 | 6.11E-05 | 16   | 0.25     | 2.10E-04 | GOLGA6L1 |
| 1191.413 | 5.078885 | -7068 | 7.21E-05 | 415  | 0.25     | 0.004828 | PLGLB2   |
| 648.9707 | 13.41843 | -7068 | 7.05E-05 | 138  | 0.25     | 0.00134  | SSX4     |
| 165.5702 | 10.16968 | -7068 | 7.05E-05 | 100  | 0.333333 | 0.001359 | BAHCC1   |
| 505.4897 | 12.15681 | -7068 | 7.10E-05 | 150  | 0.333333 | 0.001961 | GGT1     |
| 5182.091 | 7.088441 | -7068 | 7.43E-05 | 748  | 0.333333 | 0.011792 | TICAM2   |
| 28.81553 | 7.215941 | -7068 | 6.83E-05 | 49   | 0.25     | 6.15E-04 | OVOS2    |

|          |          |       |          |      |          |          |         |
|----------|----------|-------|----------|------|----------|----------|---------|
| 3458.795 | 7.929891 | -7068 | 7.34E-05 | 568  | 0.333333 | 0.009124 | MYRFL   |
| 1141.696 | 8.079538 | -7068 | 7.22E-05 | 332  | 0.333333 | 0.005345 | FBF1    |
| 1743.014 | 9.484908 | -7068 | 7.23E-05 | 363  | 0.333333 | 0.006076 | RAD9B   |
| 0.823281 | 2.484938 | -7068 | 6.11E-05 | 15   | 0.25     | 2.45E-04 | PYURF   |
| 369.0547 | 74.19517 | -7068 | 5.56E-05 | 12   | 0.25     | 7.73E-05 | SPDYE1  |
| 1691.386 | 12.94332 | -7068 | 7.19E-05 | 273  | 0.333333 | 0.004129 | USP17L2 |
| 526.7442 | 9.154079 | -7068 | 7.08E-05 | 148  | 0.333333 | 0.001661 | P2RY11  |
| 10335.21 | 7.936009 | -7068 | 7.55E-05 | 971  | 0.333333 | 0.013811 | BAG3    |
| 7653.198 | 8.025966 | -7068 | 7.46E-05 | 818  | 0.333333 | 0.011208 | SIRT7   |
| 16959.09 | 8.801299 | -7068 | 7.65E-05 | 1151 | 0.333333 | 0.016007 | ERCC5   |
| 6210.237 | 10.2044  | -7068 | 7.37E-05 | 616  | 0.333333 | 0.008073 | HECTD3  |
| 5189.595 | 8.401008 | -7068 | 7.38E-05 | 650  | 0.333333 | 0.00938  | POLI    |
| 10421.25 | 7.079591 | -7068 | 7.58E-05 | 1044 | 0.333333 | 0.015221 | ACTR6   |
| 6815.701 | 6.51335  | -7068 | 7.47E-05 | 898  | 0.333333 | 0.012453 | NOTCH1  |
| 17165.52 | 7.677642 | -7068 | 7.73E-05 | 1293 | 0.333333 | 0.019503 | COMMD3  |
| 10955.71 | 7.721539 | -7068 | 7.53E-05 | 993  | 0.333333 | 0.012939 | CPSF7   |
| 22030.31 | 7.708428 | -7068 | 7.79E-05 | 1409 | 0.333333 | 0.020596 | ASH1L   |
| 8399.704 | 7.751735 | -7068 | 7.42E-05 | 801  | 0.333333 | 0.010294 | ZNF302  |
| 15847.2  | 8.2688   | -7068 | 7.66E-05 | 1168 | 0.333333 | 0.017094 | UBQLN4  |
| 6765.527 | 8.252318 | -7068 | 7.44E-05 | 775  | 0.333333 | 0.011359 | FBXO6   |
| 2997.675 | 6.465791 | -7068 | 7.34E-05 | 603  | 0.333333 | 0.008746 | BMI1    |
| 21009.95 | 8.602895 | -7068 | 7.73E-05 | 1290 | 0.333333 | 0.018521 | DRD5    |
| 18011.11 | 9.728257 | -7068 | 7.61E-05 | 1055 | 0.333333 | 0.013181 | ALPP    |
| 9631.572 | 8.274409 | -7068 | 7.52E-05 | 911  | 0.333333 | 0.012804 | SIRT2   |
| 9493.464 | 9.220713 | -7068 | 7.46E-05 | 808  | 0.333333 | 0.011202 | ANKRD49 |
| 12342.69 | 8.122707 | -7068 | 7.59E-05 | 1045 | 0.333333 | 0.015953 | ARGLU1  |
| 13454.15 | 7.565606 | -7068 | 7.66E-05 | 1153 | 0.333333 | 0.017704 | MYO9A   |
| 4157.933 | 5.983673 | -7068 | 7.36E-05 | 711  | 0.333333 | 0.008452 | RPL3    |
| 7975.301 | 6.205265 | -7068 | 7.52E-05 | 986  | 0.333333 | 0.012919 | PTBP1   |
| 6615.873 | 7.775453 | -7068 | 7.46E-05 | 805  | 0.333333 | 0.012095 | SMC6    |
| 12835.05 | 7.160756 | -7068 | 7.63E-05 | 1142 | 0.333333 | 0.016924 | CAAP1   |
| 29942.99 | 7.024737 | -7068 | 8.02E-05 | 1815 | 0.333333 | 0.027327 | FBXW7   |
| 6879.457 | 7.670964 | -7068 | 7.46E-05 | 818  | 0.333333 | 0.011957 | FAF1    |
| 27262.43 | 6.915393 | -7068 | 7.97E-05 | 1743 | 0.333333 | 0.026103 | CAMK2D  |
| 2986.211 | 9.24294  | -7068 | 7.27E-05 | 448  | 0.333333 | 0.005645 | NP1PA1  |
| 14972.93 | 6.969615 | -7068 | 7.72E-05 | 1292 | 0.333333 | 0.019821 | USP47   |
| 930.9118 | 6.21293  | -7068 | 7.20E-05 | 340  | 0.333333 | 0.005261 | HSPA1A  |
| 15416.15 | 6.959159 | -7068 | 7.70E-05 | 1286 | 0.333333 | 0.01817  | PDGFD   |
| 5264.596 | 8.175446 | -7068 | 7.40E-05 | 672  | 0.333333 | 0.00943  | PUS1    |
| 7143.563 | 7.603131 | -7068 | 7.47E-05 | 830  | 0.333333 | 0.01213  | INTS8   |
| 7501.491 | 6.448514 | -7068 | 7.55E-05 | 968  | 0.333333 | 0.014799 | ARL8B   |

|          |          |       |          |      |          |          |          |
|----------|----------|-------|----------|------|----------|----------|----------|
| 8190.242 | 8.634735 | -7068 | 7.47E-05 | 817  | 0.333333 | 0.011788 | TAF1D    |
| 4730.018 | 6.885106 | -7068 | 7.43E-05 | 736  | 0.333333 | 0.011275 | YPEL5    |
| 9751.494 | 7.358208 | -7068 | 7.57E-05 | 1002 | 0.333333 | 0.015294 | SENP7    |
| 4904.443 | 8.984369 | -7068 | 7.36E-05 | 618  | 0.333333 | 0.009015 | ULK4     |
| 13029.52 | 7.236453 | -7068 | 7.65E-05 | 1163 | 0.333333 | 0.016977 | SRPRB    |
| 20308.13 | 6.435581 | -7068 | 7.88E-05 | 1617 | 0.333333 | 0.024698 | SET      |
| 13239.49 | 7.715319 | -7068 | 7.63E-05 | 1125 | 0.333333 | 0.016115 | DCTN1    |
| 8104.602 | 11.12252 | -7068 | 7.39E-05 | 645  | 0.333333 | 0.007932 | P4HTM    |
| 18624.59 | 12.37981 | -7068 | 7.49E-05 | 851  | 0.333333 | 0.010632 | GPR75    |
| 8755.74  | 7.130952 | -7068 | 7.54E-05 | 968  | 0.333333 | 0.014159 | DROSHA   |
| 9641.389 | 6.228956 | -7068 | 7.59E-05 | 1087 | 0.333333 | 0.015797 | NOL11    |
| 5240.518 | 7.605711 | -7068 | 7.40E-05 | 699  | 0.333333 | 0.010288 | CASP8AP2 |
| 12251.41 | 5.783018 | -7068 | 7.62E-05 | 1292 | 0.333333 | 0.015955 | MAPK3    |
| 6697.254 | 9.204547 | -7068 | 7.39E-05 | 672  | 0.333333 | 0.008113 | DENND1C  |
| 15686.88 | 6.312503 | -7068 | 7.79E-05 | 1429 | 0.333333 | 0.021891 | PELI1    |
| 5105.729 | 8.516304 | -7068 | 7.37E-05 | 628  | 0.333333 | 0.008275 | C12orf10 |
| 6842.91  | 6.566708 | -7068 | 7.48E-05 | 873  | 0.333333 | 0.012186 | NOC3L    |
| 13321.01 | 7.377758 | -7068 | 7.64E-05 | 1162 | 0.333333 | 0.017402 | BACH2    |
| 20659.05 | 6.714179 | -7068 | 7.87E-05 | 1564 | 0.333333 | 0.024036 | TBL1XR1  |
| 7492.033 | 6.952537 | -7068 | 7.52E-05 | 924  | 0.333333 | 0.014389 | SNX5     |
| 10977.66 | 7.759131 | -7068 | 7.57E-05 | 1016 | 0.333333 | 0.01499  | RMI1     |
| 16355.29 | 7.971508 | -7068 | 7.69E-05 | 1212 | 0.333333 | 0.018148 | HDAC11   |
| 5271.463 | 6.739289 | -7068 | 7.42E-05 | 776  | 0.333333 | 0.010921 | MATR3    |
| 4648.827 | 9.937542 | -7068 | 7.32E-05 | 537  | 0.333333 | 0.007033 | ARFGAP1  |
| 5222.93  | 6.508581 | -7068 | 7.43E-05 | 798  | 0.333333 | 0.011623 | PDPK1    |
| 6542.26  | 8.034067 | -7068 | 7.42E-05 | 758  | 0.333333 | 0.010642 | KLF2     |
| 6663.77  | 7.58307  | -7068 | 7.45E-05 | 783  | 0.333333 | 0.010355 | LONP1    |
| 5570.108 | 9.207146 | -7068 | 7.39E-05 | 635  | 0.333333 | 0.008826 | MAP1S    |
| 7369.988 | 6.520261 | -7068 | 7.57E-05 | 974  | 0.333333 | 0.016444 | CEP170   |
| 3063.548 | 7.436078 | -7068 | 7.31E-05 | 549  | 0.333333 | 0.007885 | EIF3L    |
| 11205.76 | 7.40767  | -7068 | 7.61E-05 | 1075 | 0.333333 | 0.016588 | PDCD4    |
| 9331.067 | 6.561067 | -7068 | 7.61E-05 | 1083 | 0.333333 | 0.01742  | REV1     |
| 7657.01  | 6.443849 | -7068 | 7.53E-05 | 979  | 0.333333 | 0.014417 | NCOR1    |
| 4900.678 | 11.203   | -7068 | 7.29E-05 | 487  | 0.333333 | 0.006209 | ANKRD36B |
| 9596.886 | 6.911522 | -7068 | 7.56E-05 | 1035 | 0.333333 | 0.015157 | UBQLN1   |
| 11912.86 | 7.528504 | -7068 | 7.64E-05 | 1116 | 0.333333 | 0.017204 | NAGK     |
| 2172.306 | 8.139453 | -7068 | 7.27E-05 | 445  | 0.333333 | 0.00671  | NCBP3    |
| 10204.78 | 6.615314 | -7068 | 7.58E-05 | 1061 | 0.333333 | 0.014634 | MRPL15   |
| 11715.17 | 6.445885 | -7068 | 7.64E-05 | 1183 | 0.333333 | 0.017491 | DCAF6    |
| 8042.63  | 6.855992 | -7068 | 7.51E-05 | 926  | 0.333333 | 0.012611 | HLA-DRB1 |
| 48837.8  | 8.757599 | -7068 | 8.06E-05 | 1913 | 0.333333 | 0.026454 | DAB1     |

|          |          |       |          |      |          |          |          |
|----------|----------|-------|----------|------|----------|----------|----------|
| 13890.83 | 7.579911 | -7068 | 7.67E-05 | 1190 | 0.333333 | 0.018257 | ANKFY1   |
| 10956.5  | 6.918013 | -7068 | 7.61E-05 | 1103 | 0.333333 | 0.016511 | SLTM     |
| 1282.14  | 10.54716 | -7068 | 7.16E-05 | 248  | 0.25     | 0.00331  | MESP1    |
| 11130.74 | 6.863587 | -7068 | 7.63E-05 | 1128 | 0.333333 | 0.017298 | SLC24A3  |
| 12641.09 | 6.776514 | -7068 | 7.69E-05 | 1217 | 0.333333 | 0.019406 | ARMC1    |
| 17564.87 | 7.866987 | -7068 | 7.71E-05 | 1254 | 0.333333 | 0.019239 | LRRC49   |
| 6383.369 | 6.99231  | -7068 | 7.50E-05 | 850  | 0.333333 | 0.01323  | PTCD3    |
| 12852.24 | 7.665983 | -7068 | 7.60E-05 | 1082 | 0.333333 | 0.014972 | ACSF2    |
| 14526.25 | 5.840626 | -7068 | 7.77E-05 | 1463 | 0.333333 | 0.0222   | FKBP1A   |
| 2775.306 | 7.89111  | -7068 | 7.31E-05 | 510  | 0.333333 | 0.007777 | GCC2     |
| 4594.731 | 7.570142 | -7068 | 7.39E-05 | 673  | 0.333333 | 0.009938 | FKBP3    |
| 2673.921 | 8.873957 | -7068 | 7.27E-05 | 445  | 0.333333 | 0.006117 | NPDC1    |
| 4807.142 | 7.827995 | -7068 | 7.36E-05 | 645  | 0.333333 | 0.00863  | CHCHD2   |
| 6739.259 | 8.468382 | -7068 | 7.43E-05 | 748  | 0.333333 | 0.010793 | PLEKHO1  |
| 5296.362 | 8.621645 | -7068 | 7.39E-05 | 655  | 0.333333 | 0.009286 | MUL1     |
| 2650.695 | 5.037854 | -7068 | 7.34E-05 | 639  | 0.333333 | 0.008945 | PUS7     |
| 5156.502 | 7.229328 | -7068 | 7.42E-05 | 730  | 0.333333 | 0.010848 | COPS4    |
| 15074.46 | 6.562925 | -7068 | 7.77E-05 | 1367 | 0.333333 | 0.021715 | AK3      |
| 8154.159 | 7.776118 | -7068 | 7.51E-05 | 887  | 0.333333 | 0.013538 | JADE1    |
| 6221.925 | 7.050727 | -7068 | 7.49E-05 | 843  | 0.333333 | 0.013154 | UBE2Z    |
| 4254.14  | 7.312373 | -7068 | 7.38E-05 | 642  | 0.333333 | 0.009003 | IMP3     |
| 4794.036 | 10.55551 | -7068 | 7.32E-05 | 525  | 0.333333 | 0.007039 | CDK5RAP3 |
| 2476.547 | 6.844595 | -7068 | 7.33E-05 | 545  | 0.333333 | 0.009178 | LSM11    |
| 3829.462 | 7.222561 | -7068 | 7.35E-05 | 613  | 0.333333 | 0.008258 | UXT      |
| 8123.964 | 8.495629 | -7068 | 7.45E-05 | 804  | 0.333333 | 0.010925 | ARHGAP17 |
| 9247.835 | 7.309181 | -7068 | 7.56E-05 | 990  | 0.333333 | 0.015282 | POMP     |
| 4597.335 | 8.320667 | -7068 | 7.36E-05 | 607  | 0.333333 | 0.008609 | LRIF1    |
| 6893.458 | 7.514629 | -7068 | 7.49E-05 | 836  | 0.333333 | 0.01299  | PLEKHF2  |
| 2608.382 | 8.956938 | -7068 | 7.24E-05 | 419  | 0.25     | 0.005862 | LAMP5    |
| 3717.7   | 7.473553 | -7068 | 7.36E-05 | 618  | 0.333333 | 0.009396 | AFF4     |
| 9849.941 | 10.21768 | -7068 | 7.38E-05 | 705  | 0.333333 | 0.008043 | ZNF587   |
| 10819.88 | 6.913627 | -7068 | 7.61E-05 | 1116 | 0.333333 | 0.016502 | YWHAG    |
| 14332.31 | 6.530072 | -7068 | 7.75E-05 | 1329 | 0.333333 | 0.020827 | SH3BP4   |
| 4842.438 | 8.293726 | -7068 | 7.36E-05 | 620  | 0.333333 | 0.007968 | ECSIT    |
| 4285.621 | 10.52687 | -7068 | 7.29E-05 | 481  | 0.333333 | 0.005643 | E4F1     |
| 6216.841 | 7.334508 | -7068 | 7.45E-05 | 770  | 0.333333 | 0.011534 | ENOPH1   |
| 2995.953 | 8.020325 | -7068 | 7.31E-05 | 527  | 0.333333 | 0.007638 | TINF2    |
| 5301.639 | 6.354373 | -7068 | 7.46E-05 | 814  | 0.333333 | 0.012293 | NMD3     |
| 4331.212 | 6.248419 | -7068 | 7.43E-05 | 749  | 0.333333 | 0.01182  | FBXO3    |
| 10915.05 | 6.631472 | -7068 | 7.65E-05 | 1154 | 0.333333 | 0.017971 | ZRANB2   |
| 3927.668 | 8.124334 | -7068 | 7.36E-05 | 599  | 0.25     | 0.009198 | MGAT4A   |

|          |          |       |          |      |          |          |          |
|----------|----------|-------|----------|------|----------|----------|----------|
| 3168.769 | 8.50532  | -7068 | 7.31E-05 | 514  | 0.333333 | 0.007951 | IFT46    |
| 5007.496 | 6.071166 | -7068 | 7.44E-05 | 812  | 0.333333 | 0.012004 | EDN1     |
| 2905.171 | 8.015626 | -7068 | 7.30E-05 | 516  | 0.333333 | 0.007593 | EIF4A2   |
| 4969.989 | 7.329002 | -7068 | 7.41E-05 | 718  | 0.333333 | 0.010616 | PBRM1    |
| 12057.29 | 8.078526 | -7068 | 7.60E-05 | 1045 | 0.333333 | 0.01593  | RPRM     |
| 8046.507 | 9.647954 | -7068 | 7.43E-05 | 744  | 0.333333 | 0.00992  | SUV39H1  |
| 3116.878 | 8.935712 | -7068 | 7.30E-05 | 483  | 0.333333 | 0.006993 | TAC3     |
| 7310.872 | 7.118452 | -7068 | 7.52E-05 | 895  | 0.333333 | 0.014273 | MEAF6    |
| 5762.437 | 6.647424 | -7068 | 7.46E-05 | 811  | 0.333333 | 0.01216  | PCNP     |
| 7297.767 | 7.200924 | -7068 | 7.51E-05 | 884  | 0.333333 | 0.013788 | ERMP1    |
| 5440.876 | 7.765634 | -7068 | 7.41E-05 | 713  | 0.333333 | 0.010747 | RCBTB1   |
| 5028.933 | 8.572996 | -7068 | 7.38E-05 | 641  | 0.333333 | 0.009737 | MRPL36   |
| 6135.136 | 8.284754 | -7068 | 7.42E-05 | 728  | 0.333333 | 0.010645 | APTX     |
| 5803.845 | 8.457503 | -7068 | 7.39E-05 | 662  | 0.333333 | 0.008427 | ATP13A1  |
| 10071.52 | 6.604832 | -7068 | 7.60E-05 | 1073 | 0.333333 | 0.016143 | CDC73    |
| 6083.531 | 7.148827 | -7068 | 7.46E-05 | 807  | 0.333333 | 0.01222  | ALDH18A1 |
| 5046.001 | 8.92403  | -7068 | 7.37E-05 | 626  | 0.333333 | 0.009159 | GEMIN7   |
| 5843.134 | 6.566344 | -7068 | 7.43E-05 | 799  | 0.333333 | 0.010502 | GSTA3    |
| 12649.28 | 7.793644 | -7068 | 7.53E-05 | 1020 | 0.333333 | 0.013491 | NDUFA8   |
| 2923.823 | 7.604471 | -7068 | 7.30E-05 | 512  | 0.333333 | 0.006949 | TIMMDC1  |
| 5169.533 | 7.0351   | -7068 | 7.43E-05 | 754  | 0.333333 | 0.011052 | LYRM4    |
| 3253.708 | 6.246621 | -7068 | 7.34E-05 | 626  | 0.333333 | 0.008904 | USP39    |
| 3748.656 | 9.657448 | -7068 | 7.30E-05 | 490  | 0.333333 | 0.006422 | C11orf68 |
| 2354.523 | 7.602866 | -7068 | 7.29E-05 | 486  | 0.333333 | 0.007228 | NOL9     |
| 7105.205 | 7.308316 | -7068 | 7.49E-05 | 860  | 0.333333 | 0.013514 | USP16    |
| 7446.185 | 7.946601 | -7068 | 7.48E-05 | 834  | 0.333333 | 0.012736 | ATG16L1  |
| 6664.527 | 6.051724 | -7068 | 7.50E-05 | 939  | 0.333333 | 0.013583 | SEH1L    |
| 9690.281 | 8.496959 | -7068 | 7.52E-05 | 901  | 0.333333 | 0.013601 | L2HGDH   |
| 15878.55 | 6.893852 | -7068 | 7.77E-05 | 1355 | 0.333333 | 0.021195 | ZBTB10   |
| 6044.367 | 8.721442 | -7068 | 7.41E-05 | 689  | 0.333333 | 0.009918 | MEPCE    |
| 3528.352 | 8.174761 | -7068 | 7.32E-05 | 544  | 0.333333 | 0.007356 | FIS1     |
| 10808.55 | 6.5151   | -7068 | 7.64E-05 | 1153 | 0.333333 | 0.018047 | AZI2     |
| 5598.234 | 7.403085 | -7068 | 7.42E-05 | 750  | 0.333333 | 0.01087  | SIRT1    |
| 7095.514 | 7.432853 | -7068 | 7.48E-05 | 843  | 0.333333 | 0.012604 | FANCF    |
| 3433.542 | 6.701267 | -7068 | 7.36E-05 | 631  | 0.333333 | 0.009535 | RAB4A    |
| 2935.148 | 7.240946 | -7068 | 7.33E-05 | 562  | 0.333333 | 0.008832 | TIFA     |
| 7958.995 | 7.871899 | -7068 | 7.50E-05 | 866  | 0.333333 | 0.012924 | PLA2G12A |
| 6077.395 | 6.597772 | -7068 | 7.45E-05 | 815  | 0.333333 | 0.011823 | RBM7     |
| 3673.944 | 7.568369 | -7068 | 7.35E-05 | 605  | 0.333333 | 0.009385 | FCRLA    |
| 3133.7   | 10.76189 | -7068 | 7.26E-05 | 413  | 0.333333 | 0.005549 | NANOG    |
| 7278.58  | 8.3467   | -7068 | 7.44E-05 | 770  | 0.333333 | 0.011554 | ANKRD10  |

|          |          |       |          |      |          |          |          |
|----------|----------|-------|----------|------|----------|----------|----------|
| 14434.2  | 8.366519 | -7068 | 7.61E-05 | 1084 | 0.333333 | 0.015862 | ZMAT4    |
| 4049.935 | 7.790039 | -7068 | 7.35E-05 | 612  | 0.333333 | 0.008629 | GSTM1    |
| 4600.444 | 6.310074 | -7068 | 7.38E-05 | 727  | 0.333333 | 0.008961 | SNRNP200 |
| 4454.228 | 7.51174  | -7068 | 7.37E-05 | 658  | 0.333333 | 0.00897  | SHMT1    |
| 5271.595 | 7.756149 | -7068 | 7.41E-05 | 709  | 0.333333 | 0.010743 | CHRM2    |
| 5800.139 | 8.530154 | -7068 | 7.41E-05 | 698  | 0.333333 | 0.009891 | CENPO    |
| 6461.83  | 7.111784 | -7068 | 7.42E-05 | 798  | 0.333333 | 0.010701 | GPR37    |
| 7350.889 | 5.108558 | -7068 | 7.53E-05 | 1050 | 0.333333 | 0.01385  | NUP107   |
| 4450.162 | 9.634988 | -7068 | 7.33E-05 | 552  | 0.333333 | 0.007649 | GTPBP3   |
| 4064.52  | 7.126602 | -7068 | 7.37E-05 | 640  | 0.333333 | 0.008766 | TNFSF13  |
| 5358.36  | 7.080172 | -7068 | 7.44E-05 | 767  | 0.333333 | 0.011772 | SRP68    |
| 6712.716 | 7.443291 | -7068 | 7.47E-05 | 813  | 0.333333 | 0.012082 | SDHAF3   |
| 11989.16 | 7.239835 | -7068 | 7.61E-05 | 1110 | 0.333333 | 0.016272 | ISOC1    |
| 3632.77  | 10.04415 | -7068 | 7.27E-05 | 455  | 0.333333 | 0.005692 | SOX18    |
| 2721.523 | 7.42322  | -7068 | 7.31E-05 | 532  | 0.333333 | 0.007873 | COA7     |
| 10220.37 | 7.065099 | -7068 | 7.61E-05 | 1078 | 0.333333 | 0.016798 | THRAP3   |
| 2562.777 | 11.42142 | -7068 | 7.22E-05 | 346  | 0.333333 | 0.004204 | SLC16A8  |
| 6593.676 | 7.329655 | -7068 | 7.48E-05 | 835  | 0.333333 | 0.013138 | PRPF38B  |
| 6839.47  | 8.652955 | -7068 | 7.43E-05 | 737  | 0.333333 | 0.010587 | UCP1     |
| 4106.556 | 6.356114 | -7068 | 7.39E-05 | 707  | 0.333333 | 0.010229 | GTF3C3   |
| 6751.535 | 6.61003  | -7068 | 7.50E-05 | 908  | 0.333333 | 0.013724 | BRAF     |
| 1861.382 | 7.161071 | -7068 | 7.27E-05 | 451  | 0.333333 | 0.007015 | C5orf42  |
| 8531.813 | 6.476068 | -7068 | 7.55E-05 | 1022 | 0.333333 | 0.015052 | CORO1C   |
| 11512.15 | 7.308478 | -7068 | 7.62E-05 | 1088 | 0.333333 | 0.01654  | DERA     |
| 8365.036 | 7.440026 | -7068 | 7.49E-05 | 889  | 0.333333 | 0.012423 | FXD2     |
| 6153.762 | 6.614651 | -7068 | 7.46E-05 | 846  | 0.333333 | 0.011995 | ARF1     |
| 2971.353 | 7.774549 | -7068 | 7.31E-05 | 531  | 0.333333 | 0.007729 | ACAD8    |
| 8905.394 | 7.189601 | -7068 | 7.54E-05 | 961  | 0.333333 | 0.013777 | TACC3    |
| 4177.435 | 5.563677 | -7068 | 7.40E-05 | 747  | 0.333333 | 0.01029  | MRTO4    |
| 7625.763 | 6.602389 | -7068 | 7.56E-05 | 977  | 0.333333 | 0.015575 | CCDC88A  |
| 21077.94 | 7.205857 | -7068 | 7.88E-05 | 1522 | 0.333333 | 0.023795 | MRPS33   |
| 8794.066 | 6.72775  | -7068 | 7.58E-05 | 1020 | 0.333333 | 0.016046 | EXOC2    |
| 10156.36 | 7.048807 | -7068 | 7.59E-05 | 1045 | 0.333333 | 0.015475 | PARP12   |
| 10229.62 | 6.386921 | -7068 | 7.62E-05 | 1139 | 0.333333 | 0.017271 | MIS18BP1 |
| 3975.101 | 8.63972  | -7068 | 7.33E-05 | 557  | 0.333333 | 0.007759 | NOSIP    |
| 2318.45  | 7.111528 | -7068 | 7.30E-05 | 491  | 0.333333 | 0.007565 | DCTN4    |
| 2444.471 | 7.491171 | -7068 | 7.30E-05 | 495  | 0.333333 | 0.007777 | RBM45    |
| 4379.251 | 7.799444 | -7068 | 7.37E-05 | 636  | 0.333333 | 0.00916  | PARL     |
| 9845.979 | 7.230045 | -7068 | 7.55E-05 | 1000 | 0.333333 | 0.014663 | MYO5C    |
| 14288.55 | 6.876565 | -7068 | 7.71E-05 | 1270 | 0.333333 | 0.019029 | LMCD1    |
| 15964.49 | 11.64799 | -7068 | 7.51E-05 | 875  | 0.333333 | 0.012205 | PHLDB1   |

|          |          |       |          |      |          |          |          |
|----------|----------|-------|----------|------|----------|----------|----------|
| 2414.975 | 10.31035 | -7068 | 7.24E-05 | 375  | 0.333333 | 0.004733 | MRM3     |
| 15722.67 | 6.935705 | -7068 | 7.75E-05 | 1328 | 0.333333 | 0.020796 | ANKH     |
| 5542.447 | 12.30037 | -7068 | 7.31E-05 | 500  | 0.333333 | 0.006651 | A4GALT   |
| 2254.183 | 9.557003 | -7068 | 7.24E-05 | 391  | 0.333333 | 0.005309 | RC3H1    |
| 4636.78  | 9.60004  | -7068 | 7.32E-05 | 540  | 0.333333 | 0.007263 | ATRAID   |
| 2932.95  | 9.937576 | -7068 | 7.27E-05 | 424  | 0.333333 | 0.005228 | ABCA7    |
| 4616.672 | 7.208302 | -7068 | 7.40E-05 | 690  | 0.333333 | 0.01073  | TMEM126B |
| 1790.663 | 8.212299 | -7068 | 7.23E-05 | 377  | 0.333333 | 0.005161 | PSG3     |
| 3354.649 | 9.162279 | -7068 | 7.30E-05 | 502  | 0.333333 | 0.006806 | RBM15    |
| 6106.701 | 7.060435 | -7068 | 7.46E-05 | 803  | 0.333333 | 0.012006 | TFB2M    |
| 9668.471 | 6.29817  | -7068 | 7.58E-05 | 1100 | 0.333333 | 0.015653 | A2M      |
| 7203.876 | 8.191029 | -7068 | 7.46E-05 | 784  | 0.333333 | 0.011899 | LRRC40   |
| 7774.293 | 7.874742 | -7068 | 7.50E-05 | 857  | 0.333333 | 0.013197 | MYLIP    |
| 2628.218 | 8.54647  | -7068 | 7.27E-05 | 449  | 0.333333 | 0.005883 | CTLA4    |
| 4376.892 | 7.448114 | -7068 | 7.39E-05 | 667  | 0.333333 | 0.010378 | SNTG1    |
| 5387.545 | 7.980097 | -7068 | 7.41E-05 | 693  | 0.333333 | 0.009761 | MLST8    |
| 2569.147 | 8.745946 | -7068 | 7.28E-05 | 455  | 0.333333 | 0.006624 | ATP8B2   |
| 3713.475 | 6.335085 | -7068 | 7.38E-05 | 667  | 0.333333 | 0.009497 | TOMM22   |
| 3626.405 | 8.102945 | -7068 | 7.33E-05 | 558  | 0.333333 | 0.008138 | KCNK5    |
| 7458.418 | 7.398728 | -7068 | 7.50E-05 | 878  | 0.333333 | 0.013554 | GREM2    |
| 6710.145 | 7.386534 | -7068 | 7.47E-05 | 821  | 0.333333 | 0.01221  | OGFOD1   |
| 3734.801 | 6.759152 | -7068 | 7.41E-05 | 679  | 0.333333 | 0.011583 | SNX18    |
| 6547.228 | 7.966582 | -7068 | 7.46E-05 | 783  | 0.333333 | 0.011877 | SNX11    |
| 5136.345 | 8.670259 | -7068 | 7.38E-05 | 640  | 0.333333 | 0.009097 | SYTL1    |
| 9632.233 | 6.42183  | -7068 | 7.62E-05 | 1112 | 0.333333 | 0.017392 | TNS3     |
| 1936.261 | 7.029966 | -7068 | 7.27E-05 | 443  | 0.333333 | 0.006751 | DNAJB14  |
| 4777.868 | 7.248    | -7068 | 7.40E-05 | 691  | 0.333333 | 0.010032 | MRPL16   |
| 6371.913 | 9.240349 | -7068 | 7.39E-05 | 683  | 0.333333 | 0.010222 | TBC1D15  |
| 3162.909 | 7.184182 | -7068 | 7.34E-05 | 578  | 0.333333 | 0.009079 | FYTTD1   |
| 4099.644 | 6.782484 | -7068 | 7.41E-05 | 700  | 0.333333 | 0.01123  | SLC38A2  |
| 9205.22  | 7.997133 | -7068 | 7.52E-05 | 905  | 0.333333 | 0.013408 | GALNT12  |
| 5006.542 | 7.445308 | -7068 | 7.39E-05 | 686  | 0.333333 | 0.009428 | SLAMF7   |
| 2728.474 | 4.004958 | -7068 | 7.34E-05 | 749  | 0.333333 | 0.009003 | RPS3A    |
| 4510.518 | 6.678241 | -7068 | 7.39E-05 | 711  | 0.333333 | 0.009927 | SHCBP1   |
| 13425.76 | 6.173853 | -7068 | 7.70E-05 | 1318 | 0.333333 | 0.01909  | RAB7A    |
| 4121.434 | 7.745654 | -7068 | 7.32E-05 | 596  | 0.333333 | 0.00715  | MST1     |
| 12680.6  | 7.015059 | -7068 | 7.67E-05 | 1187 | 0.333333 | 0.018213 | BCOR     |
| 2806.654 | 8.503455 | -7068 | 7.29E-05 | 483  | 0.333333 | 0.006807 | MED25    |
| 3375.243 | 8.861668 | -7068 | 7.32E-05 | 518  | 0.333333 | 0.007693 | FCF1     |
| 3611.755 | 10.14733 | -7068 | 7.28E-05 | 467  | 0.333333 | 0.005933 | DEDD2    |
| 8666.857 | 7.01157  | -7068 | 7.52E-05 | 941  | 0.333333 | 0.013337 | MRPS28   |

|          |          |       |          |      |          |          |          |
|----------|----------|-------|----------|------|----------|----------|----------|
| 3039.042 | 8.651097 | -7068 | 7.28E-05 | 466  | 0.25     | 0.006539 | SPATA7   |
| 3967.808 | 9.340466 | -7068 | 7.30E-05 | 514  | 0.333333 | 0.00704  | DUSP13   |
| 2546.763 | 6.83302  | -7068 | 7.32E-05 | 541  | 0.333333 | 0.008695 | ATAD1    |
| 4549.586 | 7.886198 | -7068 | 7.38E-05 | 647  | 0.333333 | 0.010047 | SEC22A   |
| 8523.466 | 5.195505 | -7068 | 7.59E-05 | 1173 | 0.333333 | 0.016401 | SUPT16H  |
| 4813.936 | 9.308253 | -7068 | 7.35E-05 | 592  | 0.333333 | 0.008629 | OXTR     |
| 6906.75  | 7.773415 | -7068 | 7.47E-05 | 813  | 0.333333 | 0.012122 | CCDC109B |
| 10743.42 | 7.830635 | -7068 | 7.59E-05 | 1016 | 0.333333 | 0.015779 | WDR59    |
| 3282.907 | 8.854564 | -7068 | 7.31E-05 | 512  | 0.333333 | 0.00727  | SLC25A22 |
| 4383.095 | 7.888093 | -7068 | 7.38E-05 | 625  | 0.333333 | 0.009172 | CMC2     |
| 4575.739 | 6.527496 | -7068 | 7.40E-05 | 735  | 0.333333 | 0.010643 | RAB8B    |
| 2472.626 | 6.30617  | -7068 | 7.31E-05 | 554  | 0.333333 | 0.008274 | MORF4L1  |
| 4156.454 | 8.169021 | -7068 | 7.37E-05 | 614  | 0.333333 | 0.009701 | STRIP1   |
| 6512.96  | 7.899555 | -7068 | 7.45E-05 | 777  | 0.333333 | 0.011378 | ATG101   |
| 9230.966 | 7.170179 | -7068 | 7.57E-05 | 1001 | 0.333333 | 0.014998 | NDE1     |
| 7522.327 | 7.125518 | -7068 | 7.50E-05 | 884  | 0.333333 | 0.013251 | MAT2B    |
| 5142.898 | 7.550027 | -7068 | 7.40E-05 | 695  | 0.333333 | 0.010101 | MED30    |
| 12061.21 | 6.989927 | -7068 | 7.68E-05 | 1168 | 0.333333 | 0.018905 | G2E3     |
| 4946.004 | 7.131383 | -7068 | 7.40E-05 | 709  | 0.333333 | 0.009771 | MRPL11   |
| 4210.035 | 8.679759 | -7068 | 7.31E-05 | 558  | 0.333333 | 0.007206 | LUC7L    |
| 7870.057 | 9.942992 | -7068 | 7.41E-05 | 712  | 0.333333 | 0.009965 | SEMA4A   |
| 4421.641 | 7.240504 | -7068 | 7.39E-05 | 667  | 0.333333 | 0.009333 | ORMDL2   |
| 3898.785 | 7.387862 | -7068 | 7.34E-05 | 593  | 0.333333 | 0.008182 | MUC13    |
| 4836.58  | 9.566729 | -7068 | 7.35E-05 | 582  | 0.333333 | 0.00827  | ISYNA1   |
| 1740.28  | 8.513676 | -7068 | 7.25E-05 | 385  | 0.333333 | 0.005864 | GJA3     |
| 1672.599 | 8.297124 | -7068 | 7.23E-05 | 370  | 0.333333 | 0.005168 | NOL12    |
| 3197.974 | 7.265655 | -7068 | 7.34E-05 | 588  | 0.333333 | 0.009189 | WDCP     |
| 4492.967 | 7.71947  | -7068 | 7.39E-05 | 662  | 0.333333 | 0.010114 | CRYZL1   |
| 6064.789 | 7.932657 | -7068 | 7.44E-05 | 754  | 0.333333 | 0.011503 | FBXO25   |
| 7920.415 | 7.888297 | -7068 | 7.48E-05 | 852  | 0.333333 | 0.012581 | RHOU     |
| 1850.457 | 8.360154 | -7068 | 7.24E-05 | 387  | 0.333333 | 0.005396 | MRPS15   |
| 9112.833 | 6.780088 | -7068 | 7.50E-05 | 982  | 0.333333 | 0.012938 | CENPA    |
| 5807.679 | 7.194811 | -7068 | 7.46E-05 | 792  | 0.333333 | 0.012181 | DDX50    |
| 11270.08 | 6.982035 | -7068 | 7.61E-05 | 1105 | 0.333333 | 0.016343 | DCUN1D5  |
| 3191.312 | 9.735016 | -7068 | 7.28E-05 | 459  | 0.333333 | 0.006278 | PIP4K2C  |
| 3857.326 | 6.861957 | -7068 | 7.37E-05 | 642  | 0.333333 | 0.009436 | EMC8     |
| 4128.5   | 7.172532 | -7068 | 7.37E-05 | 655  | 0.333333 | 0.00954  | PER3     |
| 2025.646 | 7.277851 | -7068 | 7.28E-05 | 467  | 0.333333 | 0.00741  | TTC7A    |
| 3040.61  | 7.064587 | -7068 | 7.35E-05 | 586  | 0.333333 | 0.009591 | PLEKHA5  |
| 5777.951 | 7.357717 | -7068 | 7.45E-05 | 779  | 0.333333 | 0.012051 | RWDD2B   |
| 2724.48  | 7.842934 | -7068 | 7.30E-05 | 501  | 0.333333 | 0.007315 | PLVAP    |



|          |          |       |          |      |          |          |          |
|----------|----------|-------|----------|------|----------|----------|----------|
| 10746.92 | 6.869794 | -7068 | 7.63E-05 | 1112 | 0.333333 | 0.017294 | FAM46A   |
| 3228.705 | 7.671083 | -7068 | 7.34E-05 | 569  | 0.333333 | 0.008875 | OSBPL11  |
| 4682.776 | 7.877794 | -7068 | 7.35E-05 | 639  | 0.333333 | 0.008653 | RAD54B   |
| 34624.08 | 6.980397 | -7068 | 8.14E-05 | 1978 | 0.333333 | 0.030523 | FOXP1    |
| 2622.324 | 9.473999 | -7068 | 7.26E-05 | 415  | 0.333333 | 0.005824 | CYP46A1  |
| 5242.932 | 7.145519 | -7068 | 7.41E-05 | 734  | 0.333333 | 0.010527 | NUP54    |
| 3362.024 | 10.94087 | -7068 | 7.27E-05 | 430  | 0.333333 | 0.006141 | EN1      |
| 2894.232 | 6.487271 | -7068 | 7.33E-05 | 597  | 0.333333 | 0.008533 | PTMA     |
| 3955.751 | 8.961997 | -7068 | 7.32E-05 | 538  | 0.333333 | 0.007386 | VPS25    |
| 5221.892 | 7.107476 | -7068 | 7.43E-05 | 749  | 0.333333 | 0.010988 | TFB1M    |
| 7019.776 | 6.788246 | -7068 | 7.53E-05 | 903  | 0.333333 | 0.01465  | TMEM117  |
| 2141.441 | 10.18939 | -7068 | 7.21E-05 | 337  | 0.333333 | 0.004272 | SEMA6B   |
| 3905.054 | 7.941245 | -7068 | 7.33E-05 | 569  | 0.333333 | 0.007492 | SLC13A1  |
| 2554.276 | 6.107339 | -7068 | 7.30E-05 | 544  | 0.333333 | 0.007302 | SF3B5    |
| 4108.539 | 6.474361 | -7068 | 7.36E-05 | 639  | 0.333333 | 0.007744 | MRPL4    |
| 7003.089 | 6.645519 | -7068 | 7.45E-05 | 869  | 0.333333 | 0.011627 | RBM28    |
| 3259.552 | 8.090899 | -7068 | 7.32E-05 | 529  | 0.333333 | 0.00784  | TCEAL9   |
| 3308.807 | 8.350796 | -7068 | 7.32E-05 | 542  | 0.333333 | 0.008224 | UBA6     |
| 4332.07  | 7.695461 | -7068 | 7.36E-05 | 627  | 0.333333 | 0.008944 | PALB2    |
| 2782.457 | 7.903766 | -7068 | 7.29E-05 | 503  | 0.333333 | 0.007433 | WDYHV1   |
| 10907.67 | 7.49392  | -7068 | 7.62E-05 | 1051 | 0.333333 | 0.016888 | ARPP21   |
| 4772.168 | 6.817248 | -7068 | 7.41E-05 | 728  | 0.333333 | 0.010678 | EGLN1    |
| 3823.18  | 7.205268 | -7068 | 7.38E-05 | 651  | 0.333333 | 0.010589 | PCGF5    |
| 11337.65 | 8.205139 | -7068 | 7.59E-05 | 1016 | 0.333333 | 0.01559  | NINJ2    |
| 6732.602 | 7.418192 | -7068 | 7.48E-05 | 828  | 0.333333 | 0.01193  | HN1      |
| 5271.051 | 7.5916   | -7068 | 7.41E-05 | 710  | 0.333333 | 0.01029  | GLRX2    |
| 6161.86  | 12.26484 | -7068 | 7.32E-05 | 532  | 0.333333 | 0.006679 | CPSF1    |
| 3019.753 | 8.20828  | -7068 | 7.31E-05 | 512  | 0.333333 | 0.007762 | RNF19A   |
| 3965.393 | 6.28164  | -7068 | 7.38E-05 | 709  | 0.333333 | 0.010003 | HSP90B1  |
| 2705.622 | 10.25943 | -7068 | 7.26E-05 | 406  | 0.333333 | 0.005395 | BOK      |
| 6175.179 | 7.403015 | -7068 | 7.44E-05 | 785  | 0.333333 | 0.011588 | GRHL2    |
| 4627.021 | 8.370214 | -7068 | 7.36E-05 | 617  | 0.333333 | 0.008825 | CORIN    |
| 8206.232 | 7.694948 | -7068 | 7.51E-05 | 887  | 0.333333 | 0.013077 | CPT2     |
| 7498.238 | 7.168679 | -7068 | 7.51E-05 | 877  | 0.333333 | 0.013047 | MRPL13   |
| 3336.397 | 7.360779 | -7068 | 7.33E-05 | 576  | 0.333333 | 0.008754 | SLC25A32 |
| 2919.253 | 6.011796 | -7068 | 7.33E-05 | 617  | 0.333333 | 0.008324 | RPLP2    |
| 5331.408 | 7.158019 | -7068 | 7.43E-05 | 760  | 0.333333 | 0.011685 | RBM22    |
| 2874.918 | 8.857414 | -7068 | 7.29E-05 | 476  | 0.333333 | 0.007255 | FAM214A  |
| 12606.02 | 5.483765 | -7068 | 7.72E-05 | 1388 | 0.333333 | 0.020054 | DCN      |
| 4460.789 | 7.916413 | -7068 | 7.40E-05 | 663  | 0.333333 | 0.010617 | SMUG1    |
| 5258.979 | 8.247236 | -7068 | 7.41E-05 | 679  | 0.333333 | 0.009935 | ZDHC7    |

|          |          |       |          |      |          |          |          |
|----------|----------|-------|----------|------|----------|----------|----------|
| 11843.14 | 7.191023 | -7068 | 7.62E-05 | 1122 | 0.333333 | 0.016796 | PID1     |
| 6957.277 | 6.900826 | -7068 | 7.48E-05 | 866  | 0.333333 | 0.012491 | GAR1     |
| 5150.615 | 8.177914 | -7068 | 7.39E-05 | 673  | 0.333333 | 0.009672 | SLC8B1   |
| 6404.084 | 8.053396 | -7068 | 7.45E-05 | 766  | 0.333333 | 0.011154 | CNN2     |
| 5900.651 | 9.15404  | -7068 | 7.39E-05 | 661  | 0.333333 | 0.00951  | ADRA2B   |
| 3878.136 | 7.647306 | -7068 | 7.37E-05 | 624  | 0.333333 | 0.009635 | ELP3     |
| 4929.199 | 7.937158 | -7068 | 7.40E-05 | 685  | 0.333333 | 0.010545 | COX15    |
| 2672.581 | 6.819658 | -7068 | 7.30E-05 | 534  | 0.333333 | 0.00754  | UTP11    |
| 6878.111 | 11.66862 | -7068 | 7.35E-05 | 567  | 0.333333 | 0.007618 | GJD2     |
| 13385.7  | 6.744807 | -7068 | 7.71E-05 | 1258 | 0.333333 | 0.019344 | EGLN3    |
| 9549.734 | 12.70351 | -7068 | 7.38E-05 | 628  | 0.333333 | 0.008699 | APOL5    |
| 3846.108 | 7.767356 | -7068 | 7.36E-05 | 609  | 0.333333 | 0.009107 | ADIPOR1  |
| 3332.563 | 7.112265 | -7068 | 7.36E-05 | 607  | 0.333333 | 0.009278 | ARPC5L   |
| 3064.807 | 8.938013 | -7068 | 7.30E-05 | 493  | 0.333333 | 0.00725  | FBXL12   |
| 2797.2   | 8.428916 | -7068 | 7.31E-05 | 493  | 0.333333 | 0.007302 | PDPR     |
| 5184.776 | 7.152887 | -7068 | 7.45E-05 | 758  | 0.333333 | 0.012328 | RMDN1    |
| 8855.794 | 7.637188 | -7068 | 7.53E-05 | 931  | 0.333333 | 0.013994 | CTNBL1   |
| 2299.083 | 10.25401 | -7068 | 7.24E-05 | 371  | 0.25     | 0.004819 | SPATA20  |
| 10008.77 | 6.871845 | -7068 | 7.61E-05 | 1078 | 0.333333 | 0.01653  | BACE2    |
| 6216.902 | 6.508586 | -7068 | 7.48E-05 | 858  | 0.333333 | 0.012403 | GMNN     |
| 10877.57 | 7.042534 | -7068 | 7.63E-05 | 1102 | 0.333333 | 0.017094 | PAG1     |
| 27306.21 | 7.151792 | -7068 | 7.94E-05 | 1691 | 0.333333 | 0.024385 | ADAMTS9  |
| 3189.248 | 8.532235 | -7068 | 7.30E-05 | 513  | 0.333333 | 0.007351 | SPG21    |
| 5734.742 | 7.299231 | -7068 | 7.43E-05 | 759  | 0.333333 | 0.011432 | EIF2AK3  |
| 9150.198 | 7.064243 | -7068 | 7.56E-05 | 998  | 0.25     | 0.015058 | FLRT3    |
| 1816.643 | 7.694873 | -7068 | 7.25E-05 | 401  | 0.333333 | 0.005412 | MRPL20   |
| 3025.659 | 7.667667 | -7068 | 7.34E-05 | 554  | 0.333333 | 0.008697 | SEN2     |
| 5213.471 | 8.100047 | -7068 | 7.40E-05 | 681  | 0.333333 | 0.009974 | MRPL44   |
| 2825.039 | 6.382372 | -7068 | 7.33E-05 | 588  | 0.333333 | 0.00844  | LSM8     |
| 6986.507 | 10.65284 | -7068 | 7.38E-05 | 625  | 0.333333 | 0.008935 | IL1RAPL2 |
| 5062.436 | 8.130381 | -7068 | 7.39E-05 | 669  | 0.333333 | 0.010472 | GDNF     |
| 1760.961 | 8.323453 | -7068 | 7.25E-05 | 393  | 0.333333 | 0.005704 | SLC12A7  |
| 26832.29 | 7.065501 | -7068 | 8.01E-05 | 1734 | 0.333333 | 0.027545 | FRMD4A   |
| 4006.986 | 9.07587  | -7068 | 7.32E-05 | 541  | 0.333333 | 0.007487 | KLF13    |
| 2272.289 | 10.93234 | -7068 | 7.23E-05 | 354  | 0.333333 | 0.005072 | TPTE     |
| 7790.886 | 8.093585 | -7068 | 7.48E-05 | 825  | 0.333333 | 0.012156 | FZD4     |
| 3532.947 | 8.181113 | -7068 | 7.33E-05 | 549  | 0.333333 | 0.007757 | COQ6     |
| 10214.46 | 8.413754 | -7068 | 7.52E-05 | 908  | 0.333333 | 0.012871 | SLC2A9   |
| 13477.09 | 8.1884   | -7068 | 7.63E-05 | 1089 | 0.333333 | 0.016667 | HERC1    |
| 2091.829 | 11.51571 | -7068 | 7.21E-05 | 311  | 0.333333 | 0.003651 | BIRC7    |
| 9358.7   | 8.611407 | -7068 | 7.50E-05 | 860  | 0.333333 | 0.012194 | TP73     |

|          |          |       |          |      |          |          |            |
|----------|----------|-------|----------|------|----------|----------|------------|
| 3121.576 | 7.537997 | -7068 | 7.34E-05 | 565  | 0.333333 | 0.008584 | CYB5R4     |
| 13863.44 | 7.339632 | -7068 | 7.68E-05 | 1184 | 0.333333 | 0.018298 | COMMD10    |
| 11323.37 | 7.032848 | -7068 | 7.62E-05 | 1116 | 0.333333 | 0.01692  | FOLH1      |
| 6279.08  | 7.132801 | -7068 | 7.45E-05 | 786  | 0.333333 | 0.010715 | MRPS7      |
| 264.0626 | 6.221307 | -7068 | 7.07E-05 | 174  | 0.333333 | 0.002088 | MED26      |
| 3074.475 | 10.77385 | -7068 | 7.26E-05 | 414  | 0.333333 | 0.005152 | FRS3       |
| 10501.22 | 8.031321 | -7068 | 7.55E-05 | 964  | 0.333333 | 0.013925 | FA2H       |
| 3246.029 | 6.6136   | -7068 | 7.32E-05 | 593  | 0.333333 | 0.007939 | MYBBP1A    |
| 10856.25 | 7.468453 | -7068 | 7.58E-05 | 1032 | 0.333333 | 0.015561 | ST6GALNAC5 |
| 4987.816 | 8.271828 | -7068 | 7.39E-05 | 664  | 0.333333 | 0.00988  | PCTP       |
| 1953.846 | 7.462971 | -7068 | 7.26E-05 | 436  | 0.333333 | 0.006561 | IMPACT     |
| 5077.267 | 6.711857 | -7068 | 7.44E-05 | 784  | 0.25     | 0.012038 | MLYCD      |
| 10609.47 | 8.600122 | -7068 | 7.54E-05 | 930  | 0.333333 | 0.01377  | SALL4      |
| 10063.36 | 5.984325 | -7068 | 7.59E-05 | 1139 | 0.333333 | 0.016226 | COL5A1     |
| 3203.774 | 6.771921 | -7068 | 7.36E-05 | 622  | 0.333333 | 0.009866 | MFF        |
| 10674.51 | 8.589393 | -7068 | 7.54E-05 | 930  | 0.333333 | 0.013488 | ADAMTS12   |
| 9186.909 | 8.268255 | -7068 | 7.51E-05 | 888  | 0.333333 | 0.012884 | OGDHL      |
| 6732.927 | 6.913965 | -7068 | 7.50E-05 | 871  | 0.333333 | 0.014004 | RRM2B      |
| 7644.994 | 7.278056 | -7068 | 7.51E-05 | 894  | 0.333333 | 0.013537 | CYBRD1     |
| 9127.237 | 7.392478 | -7068 | 7.55E-05 | 967  | 0.333333 | 0.014427 | ANO10      |
| 3255.494 | 10.54342 | -7068 | 7.28E-05 | 439  | 0.333333 | 0.006223 | CACNA1A    |
| 2591.909 | 10.06409 | -7068 | 7.25E-05 | 392  | 0.333333 | 0.004928 | HCFC1R1    |
| 1272.72  | 7.606214 | -7068 | 7.22E-05 | 347  | 0.25     | 0.005121 | CALM3      |
| 4794.402 | 8.056885 | -7068 | 7.39E-05 | 653  | 0.333333 | 0.009691 | SCD5       |
| 3032.275 | 5.595371 | -7068 | 7.36E-05 | 653  | 0.333333 | 0.009468 | PRMT5      |
| 6468.275 | 4.96163  | -7068 | 7.53E-05 | 1055 | 0.333333 | 0.014885 | SRSF2      |
| 3642.164 | 4.034249 | -7068 | 7.40E-05 | 840  | 0.333333 | 0.010149 | DKC1       |
| 2686.806 | 9.712316 | -7068 | 7.26E-05 | 430  | 0.333333 | 0.006334 | BBS2       |
| 7437.553 | 7.474982 | -7068 | 7.46E-05 | 836  | 0.333333 | 0.011861 | SPDL1      |
| 8538.131 | 7.177525 | -7068 | 7.55E-05 | 958  | 0.333333 | 0.014801 | MOB3B      |
| 3800.113 | 9.771901 | -7068 | 7.30E-05 | 493  | 0.333333 | 0.007111 | SBNO1      |
| 3179.302 | 8.310755 | -7068 | 7.30E-05 | 509  | 0.333333 | 0.006875 | GSTM2      |
| 3230.237 | 7.740733 | -7068 | 7.30E-05 | 523  | 0.333333 | 0.007065 | PRR15L     |
| 4953.277 | 8.348575 | -7068 | 7.39E-05 | 652  | 0.333333 | 0.009684 | SESN1      |
| 10479.18 | 8.039217 | -7068 | 7.57E-05 | 989  | 0.333333 | 0.015321 | RUFY1      |
| 5681.321 | 9.649457 | -7068 | 7.31E-05 | 564  | 0.333333 | 0.006786 | ZNF286A    |
| 7470.143 | 6.611267 | -7068 | 7.53E-05 | 957  | 0.333333 | 0.014572 | MED28      |
| 13320.95 | 7.395571 | -7068 | 7.67E-05 | 1176 | 0.333333 | 0.018077 | RASSF4     |
| 4806.859 | 7.382531 | -7068 | 7.41E-05 | 713  | 0.333333 | 0.011046 | DNMT3A     |
| 18082.2  | 7.252109 | -7068 | 7.79E-05 | 1389 | 0.333333 | 0.021686 | BUD13      |
| 14542.65 | 6.816304 | -7068 | 7.70E-05 | 1288 | 0.333333 | 0.018944 | DAB2       |

|          |          |       |          |      |          |          |          |
|----------|----------|-------|----------|------|----------|----------|----------|
| 2098.397 | 7.114697 | -7068 | 7.30E-05 | 485  | 0.333333 | 0.007765 | ATL2     |
| 10031.94 | 7.045343 | -7068 | 7.61E-05 | 1060 | 0.333333 | 0.016523 | MRPL22   |
| 6419.458 | 8.098723 | -7068 | 7.45E-05 | 761  | 0.333333 | 0.011639 | PCYOX1L  |
| 14163.89 | 6.54132  | -7068 | 7.72E-05 | 1309 | 0.333333 | 0.019688 | TCF7L1   |
| 9924.444 | 13.54388 | -7068 | 7.34E-05 | 557  | 0.333333 | 0.006151 | RTBDN    |
| 8566.381 | 7.825368 | -7068 | 7.51E-05 | 890  | 0.333333 | 0.013781 | NBEA     |
| 4775.345 | 8.548223 | -7068 | 7.37E-05 | 625  | 0.333333 | 0.009026 | HYI      |
| 6079.937 | 7.606433 | -7068 | 7.45E-05 | 777  | 0.333333 | 0.011794 | PPTC7    |
| 3175.958 | 7.726922 | -7068 | 7.33E-05 | 558  | 0.333333 | 0.008016 | PNPO     |
| 5538.984 | 6.791812 | -7068 | 7.46E-05 | 815  | 0.333333 | 0.012744 | BCCIP    |
| 4449.935 | 7.919502 | -7068 | 7.38E-05 | 644  | 0.333333 | 0.009902 | HOOK1    |
| 3862.001 | 6.481982 | -7068 | 7.30E-05 | 605  | 0.333333 | 0.007169 | NDUFA4   |
| 7389.6   | 7.181833 | -7068 | 7.54E-05 | 910  | 0.333333 | 0.014913 | CDKAL1   |
| 10137.95 | 7.025123 | -7068 | 7.60E-05 | 1056 | 0.333333 | 0.016079 | CHCHD3   |
| 4508.383 | 7.01681  | -7068 | 7.39E-05 | 688  | 0.333333 | 0.010217 | PPIL1    |
| 747.1623 | 7.256941 | -7068 | 7.19E-05 | 282  | 0.333333 | 0.004694 | C5orf24  |
| 2961.078 | 10.24602 | -7068 | 7.25E-05 | 414  | 0.333333 | 0.00563  | HOXA7    |
| 2782.257 | 7.283672 | -7068 | 7.32E-05 | 532  | 0.333333 | 0.008047 | VCPKMT   |
| 7150.364 | 10.09787 | -7068 | 7.37E-05 | 626  | 0.333333 | 0.008043 | PITPNM3  |
| 6072.347 | 6.687676 | -7068 | 7.43E-05 | 801  | 0.333333 | 0.010468 | CENPM    |
| 4043.872 | 8.434289 | -7068 | 7.34E-05 | 581  | 0.333333 | 0.008354 | GALNT6   |
| 3110.683 | 7.761141 | -7068 | 7.32E-05 | 546  | 0.333333 | 0.008321 | CLIP4    |
| 4455.488 | 7.574016 | -7068 | 7.38E-05 | 662  | 0.333333 | 0.009895 | SMU1     |
| 3209.389 | 8.880021 | -7068 | 7.31E-05 | 509  | 0.333333 | 0.007992 | CHST8    |
| 7714.969 | 6.505409 | -7068 | 7.56E-05 | 989  | 0.333333 | 0.01577  | PPP1R3B  |
| 10650.11 | 8.543563 | -7068 | 7.50E-05 | 894  | 0.333333 | 0.011978 | RAB25    |
| 317.6307 | 7.832024 | -7068 | 7.12E-05 | 175  | 0.333333 | 0.002732 | CDR2     |
| 7640.433 | 6.569131 | -7068 | 7.53E-05 | 960  | 0.333333 | 0.014879 | INTS7    |
| 9581.561 | 7.415558 | -7068 | 7.57E-05 | 997  | 0.333333 | 0.015436 | FAIM     |
| 1967.679 | 6.792734 | -7068 | 7.29E-05 | 484  | 0.333333 | 0.007823 | FBLIM1   |
| 9162.944 | 6.709164 | -7068 | 7.56E-05 | 1034 | 0.333333 | 0.015249 | LIMA1    |
| 6797.275 | 8.11079  | -7068 | 7.46E-05 | 784  | 0.333333 | 0.011807 | NMRK1    |
| 3615.312 | 8.077273 | -7068 | 7.35E-05 | 584  | 0.333333 | 0.008903 | VPS37C   |
| 3633.964 | 7.437984 | -7068 | 7.33E-05 | 582  | 0.333333 | 0.008405 | TLR7     |
| 15705.59 | 6.917879 | -7068 | 7.75E-05 | 1333 | 0.333333 | 0.020746 | PDGFC    |
| 8696.464 | 7.703544 | -7068 | 7.53E-05 | 918  | 0.333333 | 0.014174 | DGKI     |
| 4725.639 | 10.43687 | -7068 | 7.31E-05 | 502  | 0.333333 | 0.006273 | ATP6V0A4 |
| 5564.933 | 7.32381  | -7068 | 7.39E-05 | 708  | 0.333333 | 0.009211 | NCF1     |
| 3283.053 | 8.393155 | -7068 | 7.30E-05 | 508  | 0.333333 | 0.006811 | PMF1     |
| 3609.027 | 7.773945 | -7068 | 7.36E-05 | 594  | 0.333333 | 0.009234 | WNT5B    |
| 2515.748 | 11.83612 | -7068 | 7.20E-05 | 322  | 0.333333 | 0.003791 | DDX4     |

|          |          |       |          |      |          |          |         |
|----------|----------|-------|----------|------|----------|----------|---------|
| 3590.353 | 8.292456 | -7068 | 7.32E-05 | 539  | 0.333333 | 0.007373 | PTGES2  |
| 2615.661 | 11.59183 | -7068 | 7.23E-05 | 356  | 0.333333 | 0.004371 | TRABD   |
| 10685.69 | 6.610269 | -7068 | 7.65E-05 | 1151 | 0.333333 | 0.018249 | SYBU    |
| 3396.614 | 7.324508 | -7068 | 7.34E-05 | 593  | 0.333333 | 0.008723 | NELFCD  |
| 4342.124 | 10.54696 | -7068 | 7.31E-05 | 499  | 0.333333 | 0.006362 | HGH1    |
| 3795.897 | 7.210895 | -7068 | 7.38E-05 | 637  | 0.333333 | 0.010075 | USP25   |
| 8118.312 | 7.812042 | -7068 | 7.47E-05 | 828  | 0.25     | 0.011274 | SLC7A9  |
| 7468.925 | 7.544291 | -7068 | 7.49E-05 | 861  | 0.333333 | 0.012753 | TOLLIP  |
| 4646.226 | 6.828648 | -7068 | 7.41E-05 | 717  | 0.333333 | 0.010863 | UBE2W   |
| 4683.958 | 9.793779 | -7068 | 7.33E-05 | 552  | 0.333333 | 0.007484 | SLC17A5 |
| 3560.833 | 8.384665 | -7068 | 7.27E-05 | 498  | 0.25     | 0.006746 | ZNF655  |
| 8958.923 | 6.495665 | -7068 | 7.57E-05 | 1041 | 0.333333 | 0.015593 | ERBIN   |
| 3013.908 | 7.237701 | -7068 | 7.29E-05 | 515  | 0.333333 | 0.005915 | CYP4F3  |
| 5196.382 | 7.718675 | -7068 | 7.41E-05 | 703  | 0.333333 | 0.010296 | ACSS3   |
| 4752.245 | 7.598704 | -7068 | 7.40E-05 | 678  | 0.333333 | 0.010016 | MCCC1   |
| 7461.506 | 7.56112  | -7068 | 7.50E-05 | 865  | 0.333333 | 0.013075 | GLRX5   |
| 2880.175 | 7.633185 | -7068 | 7.32E-05 | 528  | 0.333333 | 0.0078   | OTUB1   |
| 5210.004 | 7.44785  | -7068 | 7.43E-05 | 739  | 0.333333 | 0.011568 | WDR70   |
| 6499.504 | 8.565507 | -7068 | 7.41E-05 | 703  | 0.333333 | 0.009271 | FXD5    |
| 11130.04 | 6.653376 | -7068 | 7.64E-05 | 1161 | 0.333333 | 0.01783  | NFATC2  |
| 5832.516 | 7.915314 | -7068 | 7.42E-05 | 731  | 0.333333 | 0.011004 | SNCAIP  |
| 4222.495 | 7.616443 | -7068 | 7.37E-05 | 650  | 0.333333 | 0.009442 | CISH    |
| 4732.667 | 11.63933 | -7068 | 7.29E-05 | 460  | 0.333333 | 0.005977 | EXOC3L2 |
| 6765.974 | 6.80172  | -7068 | 7.47E-05 | 851  | 0.333333 | 0.011884 | HLA-C   |
| 22644.04 | 7.437279 | -7068 | 7.88E-05 | 1520 | 0.333333 | 0.024362 | RALGPS2 |
| 6438.748 | 7.323094 | -7068 | 7.48E-05 | 820  | 0.333333 | 0.012797 | KATNAL1 |
| 4108.88  | 7.627705 | -7068 | 7.39E-05 | 648  | 0.333333 | 0.010196 | DNAJC17 |
| 5701.173 | 8.675658 | -7068 | 7.41E-05 | 686  | 0.333333 | 0.01055  | RNPC3   |
| 3729.935 | 6.590913 | -7068 | 7.35E-05 | 626  | 0.333333 | 0.008296 | EXOSC5  |
| 2283.514 | 11.18764 | -7068 | 7.20E-05 | 329  | 0.333333 | 0.004069 | SMR3A   |
| 4792.731 | 8.719481 | -7068 | 7.36E-05 | 597  | 0.333333 | 0.007839 | PEF1    |
| 1563.138 | 12.52972 | -7068 | 7.18E-05 | 255  | 0.333333 | 0.003235 | FBXO24  |
| 2594.526 | 6.957571 | -7068 | 7.32E-05 | 539  | 0.333333 | 0.008458 | HAUS6   |
| 8738.723 | 8.649435 | -7068 | 7.49E-05 | 837  | 0.333333 | 0.011855 | MECR    |
| 1911.491 | 6.030475 | -7068 | 7.26E-05 | 491  | 0.333333 | 0.006926 | CFL2    |
| 4439.458 | 8.613176 | -7068 | 7.36E-05 | 604  | 0.333333 | 0.008877 | GFOD1   |
| 5298.459 | 8.022481 | -7068 | 7.33E-05 | 618  | 0.333333 | 0.007683 | ZNF107  |
| 4869.371 | 9.993303 | -7068 | 7.33E-05 | 537  | 0.333333 | 0.007242 | PLAC1   |
| 2983.714 | 7.533524 | -7068 | 7.29E-05 | 508  | 0.333333 | 0.006271 | TBX21   |
| 4542.578 | 7.309662 | -7068 | 7.38E-05 | 681  | 0.333333 | 0.010196 | LUC7L2  |
| 6268.411 | 11.56962 | -7068 | 7.29E-05 | 504  | 0.333333 | 0.004971 | TLR9    |

|          |          |       |          |      |          |          |           |
|----------|----------|-------|----------|------|----------|----------|-----------|
| 4725.947 | 8.621377 | -7068 | 7.37E-05 | 611  | 0.333333 | 0.00886  | CPA4      |
| 2701.837 | 7.84675  | -7068 | 7.27E-05 | 474  | 0.333333 | 0.005865 | PORCN     |
| 20958.1  | 8.423065 | -7068 | 7.75E-05 | 1323 | 0.333333 | 0.020002 | CMSS1     |
| 4892.385 | 5.87397  | -7068 | 7.41E-05 | 784  | 0.333333 | 0.010443 | GTPBP4    |
| 1571.4   | 6.138275 | -7068 | 7.23E-05 | 409  | 0.333333 | 0.005132 | MRPS2     |
| 2358.591 | 6.513961 | -7068 | 7.31E-05 | 528  | 0.333333 | 0.008196 | AP5M1     |
| 1454.502 | 6.763341 | -7068 | 7.22E-05 | 386  | 0.333333 | 0.00527  | DERL2     |
| 3369.034 | 8.594963 | -7068 | 7.33E-05 | 541  | 0.333333 | 0.008267 | CCAR2     |
| 3935.441 | 7.069594 | -7068 | 7.37E-05 | 653  | 0.333333 | 0.009638 | VAV3      |
| 10604.78 | 7.760008 | -7068 | 7.55E-05 | 981  | 0.333333 | 0.014045 | TFCP2L1   |
| 6165.553 | 7.371773 | -7068 | 7.46E-05 | 800  | 0.333333 | 0.012545 | SGPP1     |
| 2196.194 | 8.556052 | -7068 | 7.27E-05 | 425  | 0.333333 | 0.006709 | LRP11     |
| 2028.832 | 8.775555 | -7068 | 7.24E-05 | 394  | 0.333333 | 0.005289 | SRCAP     |
| 4131.73  | 6.911803 | -7068 | 7.39E-05 | 678  | 0.333333 | 0.010498 | PLEKHA1   |
| 6795.138 | 10.77021 | -7068 | 7.37E-05 | 621  | 0.333333 | 0.008765 | LPAR6     |
| 6895.571 | 8.720064 | -7068 | 7.42E-05 | 719  | 0.333333 | 0.009701 | RETSAT    |
| 7584.239 | 7.63222  | -7068 | 7.50E-05 | 877  | 0.333333 | 0.013844 | RTN3      |
| 3169.527 | 7.670238 | -7068 | 7.31E-05 | 533  | 0.333333 | 0.008029 | COMMD8    |
| 6514.043 | 7.595778 | -7068 | 7.46E-05 | 791  | 0.333333 | 0.011986 | BACE1     |
| 6712.491 | 8.652106 | -7068 | 7.41E-05 | 718  | 0.333333 | 0.009538 | PYCARD    |
| 2127.565 | 12.60549 | -7068 | 7.18E-05 | 282  | 0.333333 | 0.002962 | KCNK4     |
| 1948.485 | 9.421247 | -7068 | 7.24E-05 | 372  | 0.333333 | 0.005102 | IL37      |
| 4037.435 | 7.48023  | -7068 | 7.38E-05 | 649  | 0.333333 | 0.009357 | SOD2      |
| 10899.7  | 7.166155 | -7068 | 7.61E-05 | 1081 | 0.333333 | 0.016758 | ANTXR1    |
| 3225.594 | 7.048751 | -7068 | 7.32E-05 | 568  | 0.333333 | 0.008003 | PTRH2     |
| 5214.582 | 7.596802 | -7068 | 7.41E-05 | 710  | 0.333333 | 0.010855 | BCL11B    |
| 5458.665 | 7.340562 | -7068 | 7.45E-05 | 771  | 0.333333 | 0.012411 | PAAF1     |
| 6062.228 | 6.554666 | -7068 | 7.48E-05 | 871  | 0.333333 | 0.013644 | SH3KBP1   |
| 1041.148 | 11.14734 | -7068 | 7.16E-05 | 228  | 0.333333 | 0.002902 | TMEM164   |
| 18977.48 | 6.585868 | -7068 | 7.87E-05 | 1526 | 0.333333 | 0.024193 | ARHGAP21  |
| 8787.953 | 7.628484 | -7068 | 7.54E-05 | 930  | 0.333333 | 0.014778 | ALDH1A2   |
| 2864.85  | 10.68121 | -7068 | 7.23E-05 | 369  | 0.333333 | 0.004334 | C5AR2     |
| 5518.207 | 8.308866 | -7068 | 7.39E-05 | 678  | 0.333333 | 0.010004 | ARAP3     |
| 2284.465 | 9.711706 | -7068 | 7.23E-05 | 383  | 0.25     | 0.005209 | GDPD3     |
| 11030.53 | 6.619232 | -7068 | 7.66E-05 | 1164 | 0.333333 | 0.018546 | RHOT1     |
| 4769.826 | 8.706064 | -7068 | 7.35E-05 | 598  | 0.333333 | 0.008513 | RAB11FIP1 |
| 2948.074 | 6.177096 | -7068 | 7.35E-05 | 617  | 0.333333 | 0.009312 | TBK1      |
| 23058.49 | 7.27919  | -7068 | 7.91E-05 | 1581 | 0.333333 | 0.025016 | DPF3      |
| 3602.406 | 12.00369 | -7068 | 7.26E-05 | 397  | 0.333333 | 0.004883 | CPNE7     |
| 2864.251 | 5.118429 | -7068 | 7.35E-05 | 689  | 0.333333 | 0.009426 | ACTG1     |
| 3467.266 | 5.179331 | -7068 | 7.36E-05 | 699  | 0.333333 | 0.009192 | NUP85     |

|          |          |       |          |      |          |          |           |
|----------|----------|-------|----------|------|----------|----------|-----------|
| 3257.842 | 10.96979 | -7068 | 7.27E-05 | 418  | 0.333333 | 0.005359 | IFT122    |
| 2889.889 | 8.726087 | -7068 | 7.29E-05 | 477  | 0.333333 | 0.006799 | POLR3GL   |
| 4665.717 | 7.65414  | -7068 | 7.39E-05 | 668  | 0.333333 | 0.010191 | EPB41L5   |
| 9230.858 | 8.571835 | -7068 | 7.51E-05 | 877  | 0.333333 | 0.01326  | LHPP      |
| 1921.929 | 6.597339 | -7068 | 7.29E-05 | 486  | 0.333333 | 0.00739  | NECAP2    |
| 1438.261 | 6.950645 | -7068 | 7.24E-05 | 403  | 0.333333 | 0.006254 | 5-Mar     |
| 1711.543 | 8.275141 | -7068 | 7.24E-05 | 379  | 0.333333 | 0.005113 | PGLS      |
| 5729.712 | 9.377954 | -7068 | 7.38E-05 | 650  | 0.333333 | 0.009617 | HSD17B12  |
| 412.1872 | 8.268148 | -7068 | 7.12E-05 | 185  | 0.333333 | 0.002651 | COMMD7    |
| 5562.766 | 8.18048  | -7068 | 7.41E-05 | 705  | 0.333333 | 0.010215 | SLC39A1   |
| 2277.918 | 6.08967  | -7068 | 7.28E-05 | 519  | 0.333333 | 0.006668 | UPF3B     |
| 674.107  | 9.567883 | -7068 | 7.16E-05 | 213  | 0.333333 | 0.002989 | BAIAP2L2  |
| 2649.795 | 10.41044 | -7068 | 7.25E-05 | 394  | 0.333333 | 0.005167 | CLDN15    |
| 5748.044 | 7.286492 | -7068 | 7.43E-05 | 770  | 0.333333 | 0.011216 | BRIP1     |
| 4926.596 | 8.450362 | -7068 | 7.39E-05 | 658  | 0.333333 | 0.009993 | FAM111A   |
| 6031.299 | 9.113015 | -7068 | 7.41E-05 | 685  | 0.333333 | 0.010646 | ATAT1     |
| 2535.961 | 7.301511 | -7068 | 7.27E-05 | 490  | 0.333333 | 0.006657 | LYAR      |
| 10538.54 | 5.516624 | -7068 | 7.63E-05 | 1260 | 0.333333 | 0.017402 | EIF4A1    |
| 4631.485 | 7.667549 | -7068 | 7.40E-05 | 681  | 0.333333 | 0.010721 | CSNK1G1   |
| 3505.041 | 11.35179 | -7068 | 7.27E-05 | 403  | 0.333333 | 0.005056 | MZT2B     |
| 3413.813 | 7.194836 | -7068 | 7.30E-05 | 550  | 0.25     | 0.007335 | OGN       |
| 2837.306 | 7.452543 | -7068 | 7.30E-05 | 528  | 0.333333 | 0.007722 | LY75      |
| 6871.834 | 6.416561 | -7068 | 7.51E-05 | 925  | 0.333333 | 0.01381  | TDP1      |
| 4592.348 | 6.991799 | -7068 | 7.40E-05 | 708  | 0.333333 | 0.010281 | NEIL3     |
| 2428.831 | 8.845083 | -7068 | 7.25E-05 | 426  | 0.333333 | 0.005678 | MRPL34    |
| 2995.902 | 9.352808 | -7068 | 7.26E-05 | 430  | 0.333333 | 0.005775 | BEX2      |
| 2399.624 | 7.011175 | -7068 | 7.28E-05 | 488  | 0.333333 | 0.006277 | MRPL24    |
| 11876.97 | 7.297368 | -7068 | 7.65E-05 | 1124 | 0.333333 | 0.017365 | CCNL1     |
| 5331.397 | 6.418041 | -7068 | 7.42E-05 | 782  | 0.333333 | 0.010356 | SUCLG1    |
| 6337.463 | 7.105941 | -7068 | 7.48E-05 | 840  | 0.333333 | 0.012881 | BACH1     |
| 4387.386 | 7.910807 | -7068 | 7.36E-05 | 615  | 0.333333 | 0.008548 | TNFAIP8L2 |
| 3938.491 | 8.495456 | -7068 | 7.30E-05 | 522  | 0.333333 | 0.006247 | SLC22A8   |
| 5824.684 | 8.135258 | -7068 | 7.42E-05 | 716  | 0.333333 | 0.010283 | TRIM8     |
| 14344.27 | 8.851034 | -7068 | 7.62E-05 | 1069 | 0.333333 | 0.016896 | NKX6-1    |
| 7479.439 | 10.48521 | -7068 | 7.39E-05 | 631  | 0.333333 | 0.008429 | HRH2      |
| 4421.399 | 10.39878 | -7068 | 7.29E-05 | 491  | 0.333333 | 0.006086 | TMEM40    |
| 3779.379 | 11.08416 | -7068 | 7.29E-05 | 481  | 0.333333 | 0.007149 | DHX35     |
| 5691.017 | 7.619139 | -7068 | 7.42E-05 | 731  | 0.25     | 0.010504 | KCNJ16    |
| 5747.508 | 7.171792 | -7068 | 7.46E-05 | 801  | 0.333333 | 0.012657 | TNIP2     |
| 5526.263 | 6.945322 | -7068 | 7.44E-05 | 785  | 0.333333 | 0.012073 | RAB23     |
| 5847.397 | 7.413638 | -7068 | 7.45E-05 | 781  | 0.333333 | 0.012567 | FAM135A   |

|          |          |       |          |      |          |          |          |
|----------|----------|-------|----------|------|----------|----------|----------|
| 4130.372 | 11.70534 | -7068 | 7.27E-05 | 434  | 0.333333 | 0.005704 | FSD1     |
| 2009.351 | 6.70272  | -7068 | 7.29E-05 | 490  | 0.333333 | 0.007646 | APPL1    |
| 4553.048 | 5.086586 | -7068 | 7.41E-05 | 842  | 0.333333 | 0.010856 | RPL17    |
| 10677.88 | 7.619801 | -7068 | 7.62E-05 | 1046 | 0.333333 | 0.016992 | PDE7B    |
| 6938.344 | 7.727817 | -7068 | 7.45E-05 | 796  | 0.333333 | 0.011917 | CHPT1    |
| 2878.83  | 6.865026 | -7068 | 7.34E-05 | 574  | 0.333333 | 0.009176 | NUFIP2   |
| 5174.502 | 7.458955 | -7068 | 7.41E-05 | 711  | 0.333333 | 0.010477 | EGFL7    |
| 11483.5  | 7.278245 | -7068 | 7.61E-05 | 1085 | 0.333333 | 0.016381 | AGPAT4   |
| 5221.606 | 8.660553 | -7068 | 7.39E-05 | 654  | 0.333333 | 0.010195 | 1-Dec    |
| 3345.77  | 9.17968  | -7068 | 7.30E-05 | 479  | 0.333333 | 0.006406 | RHOT2    |
| 2712.743 | 6.341412 | -7068 | 7.35E-05 | 597  | 0.333333 | 0.009676 | HIGD1A   |
| 5209.1   | 5.246243 | -7068 | 7.43E-05 | 888  | 0.333333 | 0.011954 | RPL10    |
| 413.1103 | 9.836153 | -7068 | 7.07E-05 | 141  | 0.25     | 0.001967 | SVIP     |
| 7161.356 | 8.164184 | -7068 | 7.46E-05 | 804  | 0.333333 | 0.012465 | DNER     |
| 6625.275 | 7.041117 | -7068 | 7.48E-05 | 848  | 0.333333 | 0.012966 | SNX10    |
| 5894.415 | 7.43682  | -7068 | 7.45E-05 | 776  | 0.333333 | 0.012093 | MRPL48   |
| 5820.677 | 7.867535 | -7068 | 7.44E-05 | 740  | 0.333333 | 0.01158  | C11orf1  |
| 2260.536 | 8.712255 | -7068 | 7.25E-05 | 400  | 0.333333 | 0.005287 | C1orf116 |
| 2228.418 | 8.788492 | -7068 | 7.25E-05 | 408  | 0.333333 | 0.005769 | TPPP3    |
| 3380.992 | 7.868203 | -7068 | 7.26E-05 | 480  | 0.333333 | 0.005251 | NDUFA13  |
| 2092.538 | 8.900431 | -7068 | 7.24E-05 | 394  | 0.333333 | 0.005741 | PCSK1N   |
| 1011.975 | 7.862574 | -7068 | 7.18E-05 | 307  | 0.333333 | 0.004391 | TMEM156  |
| 6289.3   | 8.187882 | -7068 | 7.42E-05 | 733  | 0.333333 | 0.009932 | HPR      |
| 3748.062 | 8.529785 | -7068 | 7.32E-05 | 550  | 0.333333 | 0.00762  | LXN      |
| 3745.287 | 11.03623 | -7068 | 7.27E-05 | 435  | 0.333333 | 0.005935 | ARHGAP28 |
| 11045.44 | 6.684433 | -7068 | 7.62E-05 | 1138 | 0.333333 | 0.017145 | RHOJ     |
| 2466.998 | 9.606459 | -7068 | 7.26E-05 | 411  | 0.333333 | 0.005613 | PLEKHF1  |
| 2217.631 | 8.105254 | -7068 | 7.25E-05 | 421  | 0.333333 | 0.005251 | DVL2     |
| 1893.564 | 6.450719 | -7068 | 7.29E-05 | 489  | 0.333333 | 0.007538 | TRMT6    |
| 644.1988 | 9.890611 | -7068 | 7.12E-05 | 196  | 0.333333 | 0.002556 | VSTM2L   |
| 23964.82 | 22.73589 | -7068 | 7.41E-05 | 701  | 0.333333 | 0.010745 | INTS6    |
| 3431.421 | 6.124799 | -7068 | 7.35E-05 | 636  | 0.333333 | 0.008869 | TIPIN    |
| 3728.965 | 8.123732 | -7068 | 7.35E-05 | 577  | 0.333333 | 0.008553 | VPS37B   |
| 6987.202 | 7.77855  | -7068 | 7.43E-05 | 780  | 0.333333 | 0.010702 | ESRP1    |
| 889.0744 | 10.16002 | -7068 | 7.15E-05 | 231  | 0.25     | 0.003322 | EPHX4    |
| 2711.493 | 10.54156 | -7068 | 7.24E-05 | 381  | 0.333333 | 0.005052 | SLC17A6  |
| 2005.241 | 10.71879 | -7068 | 7.22E-05 | 325  | 0.333333 | 0.00407  | AHSP     |
| 8871.955 | 6.839349 | -7068 | 7.56E-05 | 1011 | 0.333333 | 0.015563 | TBX3     |
| 2790.645 | 7.936927 | -7068 | 7.31E-05 | 518  | 0.333333 | 0.007991 | MCUR1    |
| 16745.79 | 6.466216 | -7068 | 7.77E-05 | 1415 | 0.333333 | 0.020841 | CENPU    |
| 7339.92  | 7.583244 | -7068 | 7.50E-05 | 854  | 0.333333 | 0.013423 | INTS2    |



|          |          |       |          |      |          |          |           |
|----------|----------|-------|----------|------|----------|----------|-----------|
| 3373.473 | 7.69553  | -7068 | 7.30E-05 | 542  | 0.333333 | 0.006953 | EXOSC4    |
| 2521.05  | 8.367445 | -7068 | 7.27E-05 | 455  | 0.333333 | 0.006541 | SNAPIN    |
| 3910.878 | 8.790523 | -7068 | 7.33E-05 | 554  | 0.333333 | 0.007851 | SLC27A3   |
| 12714.48 | 7.045207 | -7068 | 7.68E-05 | 1199 | 0.333333 | 0.019022 | IGF2BP2   |
| 3028.131 | 9.88426  | -7068 | 7.27E-05 | 449  | 0.25     | 0.00663  | C1QTNF6   |
| 9297.055 | 6.729018 | -7068 | 7.59E-05 | 1053 | 0.333333 | 0.016606 | C1GALT1   |
| 2275.506 | 9.663234 | -7068 | 7.24E-05 | 382  | 0.333333 | 0.005433 | C9orf40   |
| 1560.456 | 6.828322 | -7068 | 7.23E-05 | 394  | 0.333333 | 0.005635 | MTERF3    |
| 2296.633 | 9.074028 | -7068 | 7.27E-05 | 426  | 0.333333 | 0.006468 | STAMBPL1  |
| 1886.721 | 8.456277 | -7068 | 7.23E-05 | 383  | 0.333333 | 0.005469 | CACNG2    |
| 2938.683 | 9.433155 | -7068 | 7.28E-05 | 456  | 0.333333 | 0.00605  | HSD17B7   |
| 7408.823 | 10.16474 | -7068 | 7.39E-05 | 666  | 0.333333 | 0.009473 | GRTP1     |
| 2508.861 | 9.915404 | -7068 | 7.25E-05 | 396  | 0.333333 | 0.005349 | COA4      |
| 11449.3  | 8.171186 | -7068 | 7.60E-05 | 1019 | 0.333333 | 0.016063 | CHODL     |
| 6523.06  | 7.258657 | -7068 | 7.48E-05 | 833  | 0.333333 | 0.013117 | GPCPD1    |
| 5170.049 | 7.633808 | -7068 | 7.40E-05 | 703  | 0.333333 | 0.010301 | CXCL14    |
| 4373.693 | 8.551416 | -7068 | 7.36E-05 | 604  | 0.333333 | 0.009368 | ARID3B    |
| 572.2854 | 10.55896 | -7068 | 7.10E-05 | 138  | 0.333333 | 0.001367 | KRTAP13-4 |
| 3735.799 | 7.25937  | -7068 | 7.37E-05 | 641  | 0.333333 | 0.009938 | MOCOS     |
| 6087.057 | 9.386784 | -7068 | 7.40E-05 | 674  | 0.333333 | 0.010366 | H3F3A     |
| 6873.656 | 8.253093 | -7068 | 7.43E-05 | 760  | 0.333333 | 0.010932 | DNAJA4    |
| 1820.172 | 7.909238 | -7068 | 7.23E-05 | 396  | 0.333333 | 0.005387 | PPCS      |
| 2142.038 | 11.17124 | -7068 | 7.20E-05 | 312  | 0.333333 | 0.00392  | IL19      |
| 456.7556 | 7.536517 | -7068 | 7.12E-05 | 208  | 0.333333 | 0.002826 | SYVN1     |
| 5693.527 | 8.535539 | -7068 | 7.41E-05 | 692  | 0.333333 | 0.010133 | AP1M1     |
| 4235.849 | 7.105243 | -7068 | 7.38E-05 | 667  | 0.333333 | 0.00982  | MANSC1    |
| 7117.639 | 7.732956 | -7068 | 7.49E-05 | 833  | 0.333333 | 0.013276 | SH3TC2    |
| 11659.23 | 6.914986 | -7068 | 7.64E-05 | 1158 | 0.333333 | 0.017742 | PSAT1     |
| 648.7198 | 8.909828 | -7068 | 7.15E-05 | 226  | 0.25     | 0.003388 | ARSG      |
| 1908.666 | 9.062063 | -7068 | 7.24E-05 | 382  | 0.333333 | 0.005326 | METRNL    |
| 8953.746 | 9.171981 | -7068 | 7.46E-05 | 794  | 0.333333 | 0.011263 | HS3ST2    |
| 5238.246 | 7.670685 | -7068 | 7.41E-05 | 702  | 0.333333 | 0.010492 | SYTL2     |
| 1720.066 | 8.496369 | -7068 | 7.18E-05 | 313  | 0.333333 | 0.003711 | NDUFA11   |
| 2615.075 | 8.041833 | -7068 | 7.27E-05 | 464  | 0.333333 | 0.006136 | PRDX5     |
| 11540.39 | 5.87714  | -7068 | 7.68E-05 | 1266 | 0.333333 | 0.019016 | ADAMTS1   |
| 6061.627 | 6.467851 | -7068 | 7.50E-05 | 878  | 0.333333 | 0.013571 | ECT2      |
| 13326.63 | 7.914084 | -7068 | 7.63E-05 | 1140 | 0.333333 | 0.01744  | INCENP    |
| 3347.813 | 8.953009 | -7068 | 7.28E-05 | 472  | 0.333333 | 0.00578  | NUBP2     |
| 2027.474 | 6.909919 | -7068 | 7.28E-05 | 477  | 0.333333 | 0.007374 | ATG3      |
| 1026.472 | 7.201241 | -7068 | 7.22E-05 | 340  | 0.333333 | 0.005678 | AP1S3     |
| 4086.332 | 7.875325 | -7068 | 7.36E-05 | 612  | 0.333333 | 0.009108 | ABHD17B   |

|          |          |       |          |      |          |          |          |
|----------|----------|-------|----------|------|----------|----------|----------|
| 3283.685 | 6.3598   | -7068 | 7.36E-05 | 644  | 0.333333 | 0.009707 | DDR1     |
| 8060.071 | 6.760423 | -7068 | 7.56E-05 | 972  | 0.333333 | 0.015623 | GPBP1    |
| 2114.519 | 8.145889 | -7068 | 7.27E-05 | 430  | 0.333333 | 0.006316 | FXYD6    |
| 7184.681 | 9.392275 | -7068 | 7.43E-05 | 719  | 0.333333 | 0.010603 | OMP      |
| 133.7971 | 7.569973 | -7068 | 7.05E-05 | 108  | 0.25     | 0.001526 | SDR42E1  |
| 5559.737 | 7.844195 | -7068 | 7.41E-05 | 710  | 0.333333 | 0.010872 | MFSD6    |
| 9255.976 | 7.087843 | -7068 | 7.57E-05 | 1007 | 0.333333 | 0.0158   | AGO2     |
| 2185.006 | 7.413279 | -7068 | 7.26E-05 | 452  | 0.25     | 0.006418 | CAMK2N1  |
| 1528.739 | 6.18652  | -7068 | 7.24E-05 | 420  | 0.333333 | 0.005411 | DDX54    |
| 4330.419 | 10.57457 | -7068 | 7.29E-05 | 487  | 0.333333 | 0.006444 | CA14     |
| 7297.147 | 7.682477 | -7068 | 7.49E-05 | 844  | 0.333333 | 0.013344 | SDPR     |
| 5370.553 | 11.90885 | -7068 | 7.30E-05 | 491  | 0.333333 | 0.006186 | SEMA3B   |
| 3198.938 | 10.96229 | -7068 | 7.25E-05 | 411  | 0.333333 | 0.005214 | NT5M     |
| 6136.05  | 7.457419 | -7068 | 7.42E-05 | 753  | 0.333333 | 0.010872 | ZWILCH   |
| 10195.69 | 7.634346 | -7068 | 7.58E-05 | 1005 | 0.333333 | 0.015682 | NSD1     |
| 4050.606 | 9.062359 | -7068 | 7.32E-05 | 553  | 0.333333 | 0.008185 | BANP     |
| 3120.976 | 7.194828 | -7068 | 7.32E-05 | 552  | 0.333333 | 0.007815 | TMEM204  |
| 5175.45  | 7.475568 | -7068 | 7.44E-05 | 739  | 0.333333 | 0.011757 | DOCK8    |
| 99.11542 | 7.533098 | -7068 | 7.03E-05 | 94   | 0.333333 | 0.001394 | POTEF    |
| 9386.248 | 5.657304 | -7068 | 7.60E-05 | 1164 | 0.333333 | 0.016736 | SRSF9    |
| 9678.934 | 6.926384 | -7068 | 7.59E-05 | 1041 | 0.333333 | 0.016283 | CADPS2   |
| 3299.407 | 9.109633 | -7068 | 7.31E-05 | 517  | 0.333333 | 0.007669 | POLR3E   |
| 1738.365 | 6.375546 | -7068 | 7.26E-05 | 454  | 0.25     | 0.006835 | TMEM14B  |
| 4788.448 | 9.187971 | -7068 | 7.34E-05 | 581  | 0.333333 | 0.007656 | GSTK1    |
| 1536.047 | 9.075199 | -7068 | 7.23E-05 | 347  | 0.333333 | 0.005072 | ATG10    |
| 6107.905 | 7.064176 | -7068 | 7.48E-05 | 824  | 0.333333 | 0.013109 | XRN1     |
| 1553.759 | 7.012886 | -7068 | 7.26E-05 | 424  | 0.333333 | 0.00707  | CDK11A   |
| 9353.577 | 7.302392 | -7068 | 7.55E-05 | 966  | 0.333333 | 0.014651 | CDK5RAP2 |
| 3339.158 | 8.824918 | -7068 | 7.32E-05 | 515  | 0.333333 | 0.007717 | TRPC5    |
| 1844.952 | 6.142311 | -7068 | 7.28E-05 | 493  | 0.333333 | 0.00764  | PRPF38A  |
| 3080.573 | 7.505757 | -7068 | 7.33E-05 | 560  | 0.333333 | 0.008963 | PDP1     |
| 5132.265 | 7.019978 | -7068 | 7.42E-05 | 737  | 0.333333 | 0.010592 | MS4A6A   |
| 3277.136 | 7.239395 | -7068 | 7.35E-05 | 591  | 0.333333 | 0.009462 | PPP1R9A  |
| 6061.174 | 7.125614 | -7068 | 7.46E-05 | 809  | 0.333333 | 0.012139 | PDSS1    |
| 5137.124 | 6.109809 | -7068 | 7.44E-05 | 808  | 0.333333 | 0.011517 | NCAPG2   |
| 12016.93 | 11.23079 | -7068 | 7.48E-05 | 810  | 0.333333 | 0.012094 | GHSR     |
| 2681.917 | 7.813774 | -7068 | 7.30E-05 | 502  | 0.333333 | 0.007329 | SDF2L1   |
| 1295.363 | 6.532945 | -7068 | 7.23E-05 | 390  | 0.333333 | 0.005566 | QARS     |
| 2367.607 | 9.766313 | -7068 | 7.25E-05 | 396  | 0.333333 | 0.005283 | FKBPL    |
| 2572.794 | 10.8707  | -7068 | 7.25E-05 | 381  | 0.333333 | 0.005022 | G6PC3    |
| 3769.797 | 9.640687 | -7068 | 7.28E-05 | 477  | 0.333333 | 0.006049 | FGF23    |

|          |          |       |          |      |          |          |          |
|----------|----------|-------|----------|------|----------|----------|----------|
| 4189.637 | 7.076161 | -7068 | 7.39E-05 | 674  | 0.333333 | 0.009876 | PPIA     |
| 9450.075 | 8.870303 | -7068 | 7.50E-05 | 868  | 0.333333 | 0.013008 | CLPB     |
| 690.5188 | 8.707122 | -7068 | 7.15E-05 | 234  | 0.333333 | 0.003416 | GGNBP2   |
| 6230.133 | 7.308139 | -7068 | 7.44E-05 | 793  | 0.333333 | 0.011616 | MRPL46   |
| 6180.267 | 7.995145 | -7068 | 7.44E-05 | 745  | 0.333333 | 0.011001 | RNF123   |
| 6876.449 | 7.677891 | -7068 | 7.47E-05 | 821  | 0.333333 | 0.012759 | AACS     |
| 8691.741 | 6.449425 | -7068 | 7.56E-05 | 1042 | 0.333333 | 0.015163 | TUBA1C   |
| 4143.326 | 8.054334 | -7068 | 7.34E-05 | 591  | 0.333333 | 0.007688 | C1RL     |
| 5159.921 | 7.256151 | -7068 | 7.42E-05 | 739  | 0.333333 | 0.011095 | UCHL5    |
| 12123.29 | 6.875707 | -7068 | 7.65E-05 | 1168 | 0.333333 | 0.017648 | KCNN2    |
| 5419.45  | 7.72313  | -7068 | 7.42E-05 | 717  | 0.333333 | 0.010635 | DIABLO   |
| 2218.96  | 7.972157 | -7068 | 7.27E-05 | 449  | 0.333333 | 0.006688 | ACSL5    |
| 14289.33 | 6.942746 | -7068 | 7.68E-05 | 1261 | 0.333333 | 0.018095 | PPARGC1A |
| 2971.189 | 7.167176 | -7068 | 7.33E-05 | 565  | 0.333333 | 0.008791 | NRN1     |
| 3563.645 | 7.151232 | -7068 | 7.34E-05 | 602  | 0.333333 | 0.008684 | EGFL6    |
| 2862.933 | 10.50329 | -7068 | 7.25E-05 | 398  | 0.333333 | 0.004972 | TSSC4    |
| 8326.553 | 8.267861 | -7068 | 7.50E-05 | 860  | 0.333333 | 0.013106 | SLC35F2  |
| 2207.973 | 6.543058 | -7068 | 7.32E-05 | 527  | 0.333333 | 0.00895  | PLEKHH2  |
| 3998.382 | 11.30259 | -7068 | 7.29E-05 | 455  | 0.333333 | 0.00594  | CSAD     |
| 4662.376 | 7.157736 | -7068 | 7.40E-05 | 684  | 0.333333 | 0.010217 | YIPF5    |
| 2535.85  | 8.801946 | -7068 | 7.27E-05 | 444  | 0.333333 | 0.006798 | SLC27A6  |
| 1813.778 | 8.891589 | -7068 | 7.23E-05 | 371  | 0.333333 | 0.005242 | FNTB     |
| 17123.95 | 6.861655 | -7068 | 7.81E-05 | 1416 | 0.333333 | 0.022335 | CAMK1D   |
| 1381.12  | 8.928138 | -7068 | 7.21E-05 | 333  | 0.333333 | 0.005027 | CXXC5    |
| 3210.018 | 8.150229 | -7068 | 7.30E-05 | 494  | 0.333333 | 0.006011 | POLDIP2  |
| 5193.074 | 6.916906 | -7068 | 7.43E-05 | 765  | 0.333333 | 0.011632 | MCAM     |
| 1985.813 | 7.757073 | -7068 | 7.27E-05 | 431  | 0.333333 | 0.006104 | LTBP3    |
| 4024.434 | 8.153182 | -7068 | 7.34E-05 | 595  | 0.333333 | 0.008287 | TRIB3    |
| 5060.819 | 11.30105 | -7068 | 7.29E-05 | 480  | 0.333333 | 0.006638 | SYT3     |
| 2796.785 | 8.912235 | -7068 | 7.28E-05 | 451  | 0.333333 | 0.005994 | CLIC3    |
| 4432.807 | 7.523232 | -7068 | 7.38E-05 | 657  | 0.333333 | 0.00989  | PMEPA1   |
| 13298.57 | 6.233089 | -7068 | 7.71E-05 | 1336 | 0.333333 | 0.020058 | RUNX1    |
| 1898.327 | 9.734065 | -7068 | 7.22E-05 | 353  | 0.333333 | 0.005027 | OLAH     |
| 4153.706 | 8.269067 | -7068 | 7.36E-05 | 616  | 0.333333 | 0.008968 | CARHSP1  |
| 3005.444 | 6.975109 | -7068 | 7.33E-05 | 572  | 0.333333 | 0.008238 | MTCH2    |
| 2510.841 | 7.330396 | -7068 | 7.31E-05 | 514  | 0.333333 | 0.008209 | OTUD6B   |
| 4631.786 | 11.30487 | -7068 | 7.29E-05 | 469  | 0.333333 | 0.006446 | LIN28A   |
| 2599.776 | 8.395164 | -7068 | 7.27E-05 | 460  | 0.333333 | 0.006627 | CCM2     |
| 4066.662 | 6.319331 | -7068 | 7.35E-05 | 659  | 0.333333 | 0.007591 | PECR     |
| 2584.466 | 6.72672  | -7068 | 7.30E-05 | 512  | 0.333333 | 0.006953 | MRPS16   |
| 2625.032 | 6.723965 | -7068 | 7.30E-05 | 546  | 0.333333 | 0.007544 | ORC6     |

|          |          |       |          |      |          |          |         |
|----------|----------|-------|----------|------|----------|----------|---------|
| 810.869  | 5.769507 | -7068 | 7.21E-05 | 349  | 0.333333 | 0.005738 | HNRNPLL |
| 11397.1  | 6.715538 | -7068 | 7.66E-05 | 1165 | 0.333333 | 0.01839  | IWS1    |
| 2680.335 | 7.559569 | -7068 | 7.29E-05 | 491  | 0.333333 | 0.007499 | TIGAR   |
| 6604.639 | 7.348858 | -7068 | 7.47E-05 | 822  | 0.333333 | 0.012669 | GALNT7  |
| 7339.328 | 9.199457 | -7068 | 7.44E-05 | 729  | 0.333333 | 0.010378 | PXMP4   |
| 10022.59 | 7.208065 | -7068 | 7.59E-05 | 1039 | 0.333333 | 0.016284 | BCAS3   |
| 3837.493 | 8.962433 | -7068 | 7.30E-05 | 515  | 0.333333 | 0.006414 | ETNK2   |
| 5512.942 | 8.313185 | -7068 | 7.40E-05 | 686  | 0.333333 | 0.010502 | GALNT14 |
| 3150.895 | 10.95021 | -7068 | 7.27E-05 | 423  | 0.333333 | 0.005745 | ELP6    |
| 2285.674 | 9.103295 | -7068 | 7.25E-05 | 398  | 0.333333 | 0.005081 | TREM2   |
| 5559.342 | 11.50692 | -7068 | 7.30E-05 | 515  | 0.333333 | 0.006355 | CERS4   |
| 8350.718 | 7.135241 | -7068 | 7.51E-05 | 928  | 0.333333 | 0.013119 | PERP    |
| 1286.495 | 8.721037 | -7068 | 7.19E-05 | 320  | 0.333333 | 0.004736 | SCML1   |
| 6770.982 | 5.964594 | -7068 | 7.48E-05 | 911  | 0.333333 | 0.012033 | PBK     |
| 3170.623 | 7.863851 | -7068 | 7.31E-05 | 530  | 0.333333 | 0.007467 | IL17RB  |
| 4194.019 | 6.779514 | -7068 | 7.40E-05 | 701  | 0.333333 | 0.010625 | SUV39H2 |
| 4080.374 | 7.738973 | -7068 | 7.37E-05 | 625  | 0.333333 | 0.00935  | TAOK1   |
| 3606.461 | 9.578465 | -7068 | 7.30E-05 | 490  | 0.333333 | 0.00676  | C1orf35 |
| 1001.336 | 3.812655 | -7068 | 7.20E-05 | 446  | 0.333333 | 0.004607 | RPL13A  |
| 1778.137 | 10.99631 | -7068 | 7.19E-05 | 298  | 0.25     | 0.00383  | MS4A12  |
| 7711.053 | 7.082235 | -7068 | 7.52E-05 | 916  | 0.333333 | 0.014387 | MEMO1   |
| 3243.731 | 9.311425 | -7068 | 7.30E-05 | 479  | 0.333333 | 0.006814 | NKAIN1  |
| 3828.112 | 5.052847 | -7068 | 7.38E-05 | 763  | 0.333333 | 0.009946 | FBXO5   |
| 4014.639 | 9.607696 | -7068 | 7.32E-05 | 519  | 0.333333 | 0.006985 | TEX264  |
| 3152.151 | 9.798307 | -7068 | 7.29E-05 | 465  | 0.333333 | 0.006547 | TRMT2B  |
| 1057.489 | 7.898681 | -7068 | 7.21E-05 | 320  | 0.333333 | 0.005261 | PDP2    |
| 3185.242 | 8.505642 | -7068 | 7.29E-05 | 485  | 0.333333 | 0.006093 | PREB    |
| 5612.295 | 7.454563 | -7068 | 7.43E-05 | 752  | 0.333333 | 0.012003 | ZNF644  |
| 4322.499 | 5.741176 | -7068 | 7.42E-05 | 773  | 0.333333 | 0.010602 | EFTUD2  |
| 1837.399 | 8.354685 | -7068 | 7.24E-05 | 390  | 0.333333 | 0.005582 | TIMM22  |
| 8904.435 | 7.473353 | -7068 | 7.55E-05 | 951  | 0.333333 | 0.014762 | RNLS    |
| 4078.01  | 7.642916 | -7068 | 7.33E-05 | 606  | 0.333333 | 0.007313 | VKORC1  |
| 633.7327 | 9.210149 | -7068 | 7.13E-05 | 204  | 0.333333 | 0.002904 | NAP1L5  |
| 143.1183 | 2.0151   | -7068 | 6.95E-05 | 153  | 0.333333 | 7.88E-04 | ZNF441  |
| 3519.653 | 12.0769  | -7068 | 7.24E-05 | 389  | 0.333333 | 0.005016 | NYX     |
| 1566.993 | 8.054725 | -7068 | 7.23E-05 | 380  | 0.333333 | 0.006195 | FAM167A |
| 1696.754 | 7.343522 | -7068 | 7.25E-05 | 414  | 0.333333 | 0.006149 | YRDC    |
| 4951.319 | 7.809041 | -7068 | 7.40E-05 | 684  | 0.333333 | 0.01022  | VTCN1   |
| 1809.001 | 7.630978 | -7068 | 7.25E-05 | 411  | 0.333333 | 0.005841 | C1orf54 |
| 7893.096 | 6.967916 | -7068 | 7.55E-05 | 955  | 0.333333 | 0.01521  | SETMAR  |
| 10343.71 | 9.146908 | -7068 | 7.47E-05 | 827  | 0.333333 | 0.010277 | HAMP    |

|          |          |       |          |      |          |          |          |
|----------|----------|-------|----------|------|----------|----------|----------|
| 5029.558 | 8.387648 | -7068 | 7.38E-05 | 642  | 0.333333 | 0.008705 | DCXR     |
| 15033.01 | 7.996007 | -7068 | 7.65E-05 | 1159 | 0.333333 | 0.017256 | RAB38    |
| 1762.758 | 8.970852 | -7068 | 7.22E-05 | 364  | 0.333333 | 0.005028 | NFS1     |
| 2607.197 | 6.790108 | -7068 | 7.31E-05 | 541  | 0.333333 | 0.007992 | DNAJB11  |
| 1746.242 | 7.877299 | -7068 | 7.24E-05 | 386  | 0.333333 | 0.005762 | DBR1     |
| 2781.945 | 8.443145 | -7068 | 7.28E-05 | 473  | 0.333333 | 0.006201 | EDF1     |
| 8173.33  | 8.954791 | -7068 | 7.46E-05 | 773  | 0.333333 | 0.011234 | IL21     |
| 4667.939 | 7.570709 | -7068 | 7.39E-05 | 677  | 0.333333 | 0.010356 | TSPAN12  |
| 2202.813 | 7.368885 | -7068 | 7.25E-05 | 443  | 0.333333 | 0.00549  | EXOSC1   |
| 854.2415 | 9.593318 | -7068 | 7.14E-05 | 217  | 0.333333 | 0.002878 | MXD4     |
| 3459.534 | 8.555183 | -7068 | 7.32E-05 | 525  | 0.333333 | 0.007183 | CTDSP1   |
| 4800.827 | 7.408769 | -7068 | 7.42E-05 | 711  | 0.333333 | 0.011183 | LGSN     |
| 6153.896 | 7.422539 | -7068 | 7.45E-05 | 790  | 0.333333 | 0.011898 | MSRA     |
| 2338.649 | 8.005341 | -7068 | 7.28E-05 | 462  | 0.333333 | 0.006725 | NTN1     |
| 4360.588 | 6.760411 | -7068 | 7.38E-05 | 687  | 0.333333 | 0.009636 | HLA-B    |
| 3427.282 | 8.088175 | -7068 | 7.32E-05 | 532  | 0.333333 | 0.006865 | CORO1B   |
| 1208.119 | 6.795624 | -7068 | 7.22E-05 | 373  | 0.333333 | 0.005666 | EEF2K    |
| 1893.352 | 10.78183 | -7068 | 7.21E-05 | 331  | 0.25     | 0.004401 | XYLT2    |
| 8520.751 | 7.199967 | -7068 | 7.55E-05 | 958  | 0.333333 | 0.015391 | NLGN4X   |
| 4439.018 | 10.72988 | -7068 | 7.31E-05 | 506  | 0.333333 | 0.007333 | GP6      |
| 12398.95 | 7.634043 | -7068 | 7.64E-05 | 1113 | 0.333333 | 0.017254 | PRSS1    |
| 4108.473 | 7.67613  | -7068 | 7.34E-05 | 605  | 0.333333 | 0.008555 | DDX55    |
| 2968.744 | 9.577424 | -7068 | 7.27E-05 | 445  | 0.333333 | 0.00623  | BBS1     |
| 3506.099 | 7.587462 | -7068 | 7.33E-05 | 581  | 0.333333 | 0.008445 | WDR5     |
| 3398.631 | 7.433177 | -7068 | 7.34E-05 | 571  | 0.333333 | 0.008938 | MCTP1    |
| 3244.468 | 9.558172 | -7068 | 7.31E-05 | 481  | 0.333333 | 0.007234 | EDA2R    |
| 3429.604 | 8.146499 | -7068 | 7.33E-05 | 539  | 0.333333 | 0.007782 | MRPS18C  |
| 2436.654 | 6.355707 | -7068 | 7.33E-05 | 560  | 0.333333 | 0.008807 | TMEM33   |
| 9751.925 | 8.084758 | -7068 | 7.55E-05 | 946  | 0.333333 | 0.014923 | TM6SF1   |
| 4806.019 | 7.935097 | -7068 | 7.39E-05 | 668  | 0.333333 | 0.010536 | SLC39A10 |
| 1471.494 | 7.645336 | -7068 | 7.14E-05 | 296  | 0.25     | 0.002987 | RBAK     |
| 1170.903 | 6.98958  | -7068 | 7.22E-05 | 361  | 0.333333 | 0.005448 | BRCC3    |
| 3828.545 | 7.350593 | -7068 | 7.36E-05 | 623  | 0.333333 | 0.00949  | CDH7     |
| 4999.149 | 9.219187 | -7068 | 7.34E-05 | 576  | 0.333333 | 0.008453 | NOTCH2NL |
| 369.5417 | 9.439337 | -7068 | 7.10E-05 | 155  | 0.333333 | 0.002012 | LRRC37A2 |
| 1413.572 | 7.418793 | -7068 | 7.21E-05 | 354  | 0.333333 | 0.004869 | CEP83    |
| 3614.271 | 6.906202 | -7068 | 7.37E-05 | 634  | 0.333333 | 0.009909 | ARL6     |
| 890.8875 | 7.813865 | -7068 | 7.17E-05 | 273  | 0.333333 | 0.003532 | EXOC7    |
| 3587.874 | 6.578148 | -7068 | 7.36E-05 | 630  | 0.333333 | 0.009368 | DONSON   |
| 2620.114 | 7.762054 | -7068 | 7.30E-05 | 495  | 0.333333 | 0.007476 | LACTB2   |
| 3926.506 | 6.521019 | -7068 | 7.39E-05 | 689  | 0.333333 | 0.010603 | RAB6A    |

|          |          |       |          |      |          |          |         |
|----------|----------|-------|----------|------|----------|----------|---------|
| 6229.232 | 7.391066 | -7068 | 7.47E-05 | 815  | 0.333333 | 0.01299  | ASAP1   |
| 871.4045 | 3.410118 | -7068 | 7.19E-05 | 439  | 0.333333 | 0.004301 | RPL7A   |
| 3997.571 | 8.050219 | -7068 | 7.36E-05 | 611  | 0.333333 | 0.009409 | SCLY    |
| 11149.13 | 7.837606 | -7068 | 7.59E-05 | 1034 | 0.333333 | 0.015598 | NEK6    |
| 7836.993 | 7.587272 | -7068 | 7.49E-05 | 875  | 0.333333 | 0.012952 | SPRY4   |
| 218.4703 | 10.64956 | -7068 | 7.06E-05 | 112  | 0.333333 | 0.001555 | QSOX2   |
| 3775.665 | 6.681823 | -7068 | 7.35E-05 | 632  | 0.333333 | 0.008328 | ASF1B   |
| 2232.041 | 7.248623 | -7068 | 7.26E-05 | 451  | 0.333333 | 0.00592  | TIMM50  |
| 2209.586 | 8.130204 | -7068 | 7.26E-05 | 425  | 0.333333 | 0.005788 | ROBO4   |
| 5728.964 | 7.040396 | -7068 | 7.44E-05 | 778  | 0.333333 | 0.01166  | MRPL1   |
| 4047.085 | 7.577108 | -7068 | 7.38E-05 | 632  | 0.333333 | 0.009849 | FBXO34  |
| 2152.305 | 9.120474 | -7068 | 7.24E-05 | 397  | 0.333333 | 0.005564 | FKBP11  |
| 5610.499 | 7.863996 | -7068 | 7.43E-05 | 730  | 0.333333 | 0.011038 | GSDMD   |
| 1795.383 | 8.203102 | -7068 | 7.24E-05 | 392  | 0.333333 | 0.005734 | FGD4    |
| 4271.338 | 7.559816 | -7068 | 7.39E-05 | 659  | 0.333333 | 0.010219 | COTL1   |
| 2164.732 | 8.410174 | -7068 | 7.26E-05 | 427  | 0.333333 | 0.006295 | LDAH    |
| 6459.932 | 8.143171 | -7068 | 7.43E-05 | 747  | 0.333333 | 0.01122  | SMCO4   |
| 2504.695 | 9.7201   | -7068 | 7.26E-05 | 423  | 0.333333 | 0.006105 | CYB5R2  |
| 4547.536 | 7.486673 | -7068 | 7.40E-05 | 683  | 0.333333 | 0.010491 | ERO1A   |
| 1882.215 | 10.64254 | -7068 | 7.21E-05 | 327  | 0.333333 | 0.004412 | IFT22   |
| 3347.526 | 13.07415 | -7068 | 7.24E-05 | 373  | 0.333333 | 0.00503  | MTNR1A  |
| 8920.418 | 6.813561 | -7068 | 7.58E-05 | 1024 | 0.333333 | 0.016169 | UQCC1   |
| 869.8846 | 9.175988 | -7068 | 7.14E-05 | 238  | 0.333333 | 0.003263 | TAF9B   |
| 4306.987 | 7.682142 | -7068 | 7.36E-05 | 642  | 0.333333 | 0.009172 | RIPK3   |
| 10832.66 | 9.12917  | -7068 | 7.52E-05 | 903  | 0.333333 | 0.013894 | TBC1D7  |
| 3154.279 | 6.966622 | -7068 | 7.36E-05 | 607  | 0.333333 | 0.010113 | HDAC8   |
| 5363.517 | 7.615174 | -7068 | 7.42E-05 | 723  | 0.333333 | 0.011384 | COA5    |
| 1655.199 | 7.058887 | -7068 | 7.27E-05 | 431  | 0.333333 | 0.007251 | TMEM64  |
| 2878.359 | 9.109213 | -7068 | 7.28E-05 | 461  | 0.333333 | 0.006778 | LRRC47  |
| 3888.546 | 7.54981  | -7068 | 7.38E-05 | 630  | 0.333333 | 0.009927 | ADI1    |
| 867.4196 | 11.48436 | -7068 | 7.14E-05 | 213  | 0.333333 | 0.002997 | NUP62CL |
| 1669.056 | 8.127765 | -7068 | 7.25E-05 | 394  | 0.333333 | 0.005908 | BCL2L13 |
| 807.2021 | 9.452835 | -7068 | 7.15E-05 | 236  | 0.333333 | 0.003613 | SLC27A1 |
| 5893.927 | 13.77622 | -7068 | 7.30E-05 | 484  | 0.333333 | 0.005913 | ZNF358  |
| 2862.932 | 7.456349 | -7068 | 7.33E-05 | 541  | 0.333333 | 0.008404 | UBE2R2  |
| 5738.002 | 6.201995 | -7068 | 7.46E-05 | 851  | 0.333333 | 0.012147 | PRC1    |
| 4657.909 | 6.369448 | -7068 | 7.45E-05 | 787  | 0.333333 | 0.012868 | ERRFI1  |
| 5702.044 | 6.811781 | -7068 | 7.47E-05 | 819  | 0.333333 | 0.01301  | FAM107B |
| 4222.404 | 9.977648 | -7068 | 7.31E-05 | 530  | 0.333333 | 0.007471 | DNMT3B  |
| 1266.938 | 10.26579 | -7068 | 7.19E-05 | 281  | 0.333333 | 0.003993 | FRMD8   |
| 1273.61  | 7.775005 | -7068 | 7.22E-05 | 354  | 0.333333 | 0.005731 | PGM2L1  |

|          |          |       |          |     |          |          |         |
|----------|----------|-------|----------|-----|----------|----------|---------|
| 2518.799 | 8.192447 | -7068 | 7.26E-05 | 444 | 0.333333 | 0.005507 | TIMM13  |
| 963.4269 | 3.654896 | -7068 | 7.21E-05 | 456 | 0.333333 | 0.005352 | RPL18A  |
| 2036.293 | 6.091738 | -7068 | 7.28E-05 | 516 | 0.333333 | 0.007088 | EEF1B2  |
| 3003.453 | 9.86931  | -7068 | 7.28E-05 | 451 | 0.333333 | 0.006199 | TMEM57  |
| 2536.866 | 9.219538 | -7068 | 7.24E-05 | 403 | 0.333333 | 0.005245 | ANKRD2  |
| 2735.916 | 5.802249 | -7068 | 7.35E-05 | 624 | 0.333333 | 0.009503 | NDC1    |
| 726.989  | 9.331552 | -7068 | 7.17E-05 | 237 | 0.333333 | 0.00374  | ORMDL3  |
| 2339.372 | 7.872258 | -7068 | 7.28E-05 | 465 | 0.333333 | 0.0068   | MARK4   |
| 2286.536 | 9.634656 | -7068 | 7.24E-05 | 382 | 0.333333 | 0.005282 | SLC45A2 |
| 2409.585 | 10.53447 | -7068 | 7.25E-05 | 378 | 0.333333 | 0.005476 | PLA2G2E |
| 6900.082 | 8.182687 | -7068 | 7.45E-05 | 776 | 0.333333 | 0.012311 | CFAP36  |
| 3624.466 | 7.842242 | -7068 | 7.35E-05 | 590 | 0.333333 | 0.008892 | HK1     |
| 2008.819 | 6.666806 | -7068 | 7.23E-05 | 436 | 0.333333 | 0.00581  | CENPQ   |
| 2362.662 | 7.657586 | -7068 | 7.28E-05 | 477 | 0.333333 | 0.007133 | ADORA2A |
| 3277.651 | 8.020821 | -7068 | 7.31E-05 | 527 | 0.333333 | 0.007557 | UQCR10  |
| 1510.443 | 9.298753 | -7068 | 7.23E-05 | 339 | 0.333333 | 0.005375 | RDH13   |
| 2618.565 | 8.738158 | -7068 | 7.27E-05 | 448 | 0.333333 | 0.005836 | NADSYN1 |
| 4511.038 | 7.923526 | -7068 | 7.38E-05 | 645 | 0.333333 | 0.010186 | ORMDL1  |
| 6147.517 | 7.485423 | -7068 | 7.44E-05 | 778 | 0.333333 | 0.011446 | SGK2    |
| 6430.72  | 7.790011 | -7068 | 7.46E-05 | 788 | 0.333333 | 0.012455 | MANEA   |
| 603.185  | 7.081885 | -7068 | 7.12E-05 | 218 | 0.333333 | 0.003347 | SLAIN2  |
| 731.1344 | 7.512274 | -7068 | 7.15E-05 | 259 | 0.25     | 0.003693 | TBCCD1  |
| 3130.954 | 5.782282 | -7068 | 7.32E-05 | 628 | 0.25     | 0.008267 | OLFML3  |
| 2693.924 | 10.29655 | -7068 | 7.26E-05 | 405 | 0.333333 | 0.005775 | BEGAIN  |
| 1974.711 | 6.419431 | -7068 | 7.27E-05 | 469 | 0.333333 | 0.006656 | MRPS17  |
| 5080.623 | 9.368211 | -7068 | 7.36E-05 | 605 | 0.333333 | 0.009188 | CCDC14  |
| 2452.573 | 8.453234 | -7068 | 7.28E-05 | 455 | 0.333333 | 0.007105 | ULK3    |
| 4941.466 | 8.224224 | -7068 | 7.38E-05 | 640 | 0.333333 | 0.009961 | ACP6    |
| 3093.638 | 8.69669  | -7068 | 7.27E-05 | 456 | 0.333333 | 0.005646 | KLK5    |
| 3310.042 | 7.700126 | -7068 | 7.34E-05 | 568 | 0.333333 | 0.008562 | RBM47   |
| 1418.625 | 7.040157 | -7068 | 7.25E-05 | 401 | 0.333333 | 0.006448 | FGD6    |
| 2755.974 | 7.102046 | -7068 | 7.33E-05 | 552 | 0.333333 | 0.008635 | BAG4    |
| 3110.166 | 9.481584 | -7068 | 7.27E-05 | 458 | 0.25     | 0.006556 | SULT1E1 |
| 930.1714 | 9.147816 | -7068 | 7.17E-05 | 263 | 0.333333 | 0.003786 | SLC38A7 |
| 3105.558 | 6.024349 | -7068 | 7.35E-05 | 631 | 0.333333 | 0.008943 | HNRNPH2 |
| 3870.094 | 6.354454 | -7068 | 7.39E-05 | 695 | 0.333333 | 0.010139 | BORA    |
| 6849.938 | 7.231908 | -7068 | 7.50E-05 | 863 | 0.333333 | 0.013709 | RRP1    |
| 8019.268 | 7.658181 | -7068 | 7.52E-05 | 906 | 0.333333 | 0.014042 | DCPS    |
| 2805.899 | 9.395719 | -7068 | 7.27E-05 | 448 | 0.333333 | 0.006286 | SLC41A3 |
| 1607.964 | 8.402752 | -7068 | 7.21E-05 | 346 | 0.333333 | 0.004369 | INTS5   |
| 5040.581 | 7.131233 | -7068 | 7.40E-05 | 706 | 0.25     | 0.009685 | HAO2    |

|          |          |       |          |      |          |          |         |
|----------|----------|-------|----------|------|----------|----------|---------|
| 3478.558 | 10.21054 | -7068 | 7.29E-05 | 475  | 0.333333 | 0.006959 | ULBP2   |
| 6031.466 | 8.820647 | -7068 | 7.40E-05 | 687  | 0.333333 | 0.010356 | ERMN    |
| 2478.536 | 9.462091 | -7068 | 7.26E-05 | 406  | 0.333333 | 0.00571  | KCNJ11  |
| 1350.486 | 9.684604 | -7068 | 7.18E-05 | 278  | 0.333333 | 0.003418 | IL22    |
| 3747.873 | 9.798199 | -7068 | 7.31E-05 | 502  | 0.333333 | 0.007356 | TREML2  |
| 247.2737 | 6.937686 | -7068 | 7.07E-05 | 158  | 0.333333 | 0.002318 | PHAX    |
| 4682.508 | 5.911002 | -7068 | 7.40E-05 | 758  | 0.333333 | 0.010406 | EXOSC3  |
| 1288.819 | 6.321673 | -7068 | 7.24E-05 | 412  | 0.333333 | 0.006276 | HARS    |
| 739.6388 | 12.80506 | -7068 | 7.11E-05 | 169  | 0.333333 | 0.002019 | HOXB4   |
| 48.40583 | 8.402391 | -7068 | 6.93E-05 | 59   | 0.25     | 8.87E-04 | GALNT4  |
| 6414.301 | 8.97136  | -7068 | 7.40E-05 | 692  | 0.333333 | 0.010623 | TSHZ1   |
| 5075.071 | 9.041643 | -7068 | 7.35E-05 | 606  | 0.333333 | 0.009121 | ATOH8   |
| 3506.833 | 8.757046 | -7068 | 7.33E-05 | 540  | 0.333333 | 0.008119 | IL18BP  |
| 9270.009 | 6.237935 | -7068 | 7.62E-05 | 1106 | 0.333333 | 0.017489 | DACT1   |
| 2555.611 | 6.363205 | -7068 | 7.33E-05 | 573  | 0.333333 | 0.009075 | CNOT7   |
| 1746.825 | 7.817635 | -7068 | 7.25E-05 | 406  | 0.333333 | 0.006174 | WNK2    |
| 1523.71  | 12.4775  | -7068 | 7.16E-05 | 251  | 0.333333 | 0.002881 | NPPC    |
| 2439.089 | 7.625373 | -7068 | 7.27E-05 | 472  | 0.333333 | 0.006467 | SNRNP25 |
| 6859.177 | 9.068912 | -7068 | 7.42E-05 | 713  | 0.333333 | 0.010269 | SIL1    |
| 2909.01  | 7.127322 | -7068 | 7.32E-05 | 547  | 0.333333 | 0.007902 | HSPB8   |
| 5136.53  | 7.483211 | -7068 | 7.43E-05 | 729  | 0.333333 | 0.011545 | TTC19   |
| 2355.409 | 8.287357 | -7068 | 7.28E-05 | 453  | 0.25     | 0.006928 | SLC39A9 |
| 2455.16  | 7.449535 | -7068 | 7.30E-05 | 499  | 0.333333 | 0.007973 | TMEM38B |
| 2401.348 | 8.027923 | -7068 | 7.29E-05 | 472  | 0.333333 | 0.007262 | VPS53   |
| 8359.566 | 7.252494 | -7068 | 7.54E-05 | 942  | 0.333333 | 0.014643 | SLC40A1 |
| 13844.1  | 9.621101 | -7068 | 7.58E-05 | 983  | 0.333333 | 0.014823 | ZNF703  |
| 5913.855 | 11.93091 | -7068 | 7.30E-05 | 505  | 0.333333 | 0.006203 | TPSD1   |
| 15768.23 | 6.569452 | -7068 | 7.80E-05 | 1401 | 0.333333 | 0.022482 | CREB5   |
| 7843.425 | 6.793594 | -7068 | 7.55E-05 | 968  | 0.333333 | 0.01534  | RERG    |
| 9345.447 | 6.677512 | -7068 | 7.60E-05 | 1063 | 0.333333 | 0.016642 | XPO5    |
| 1061.93  | 10.90912 | -7068 | 7.15E-05 | 238  | 0.333333 | 0.003078 | FAM222B |
| 3682.763 | 7.504339 | -7068 | 7.36E-05 | 615  | 0.333333 | 0.009416 | MID1IP1 |
| 5415.363 | 6.710405 | -7068 | 7.48E-05 | 819  | 0.333333 | 0.013717 | CA8     |
| 8991.55  | 7.130679 | -7068 | 7.56E-05 | 992  | 0.333333 | 0.01548  | RSRC1   |
| 12742.77 | 6.934692 | -7068 | 7.67E-05 | 1195 | 0.333333 | 0.018287 | CYP51A1 |
| 5669.553 | 8.864502 | -7068 | 7.38E-05 | 637  | 0.333333 | 0.009027 | LRRC59  |
| 1233.854 | 7.598716 | -7068 | 7.20E-05 | 339  | 0.333333 | 0.004906 | NOA1    |
| 534.2415 | 7.456718 | -7068 | 7.14E-05 | 222  | 0.333333 | 0.003441 | CCDC117 |
| 6400.717 | 7.536228 | -7068 | 7.46E-05 | 798  | 0.333333 | 0.013153 | KLHL12  |
| 6879.055 | 7.328657 | -7068 | 7.47E-05 | 836  | 0.333333 | 0.012168 | SLC47A1 |
| 5023.225 | 7.642582 | -7068 | 7.38E-05 | 678  | 0.333333 | 0.009636 | TMC5    |



|          |          |       |          |      |          |          |          |
|----------|----------|-------|----------|------|----------|----------|----------|
| 3738.172 | 8.190354 | -7068 | 7.34E-05 | 571  | 0.333333 | 0.008609 | TMEM132A |
| 9393.859 | 6.972013 | -7068 | 7.56E-05 | 1000 | 0.333333 | 0.01474  | AGXT2    |
| 1899.1   | 10.41261 | -7068 | 7.21E-05 | 337  | 0.333333 | 0.004575 | KERA     |
| 2415.733 | 10.09919 | -7068 | 7.19E-05 | 335  | 0.333333 | 0.003248 | NDUFA3   |
| 4512.728 | 8.123248 | -7068 | 7.36E-05 | 615  | 0.333333 | 0.007872 | G6PD     |
| 11293.09 | 6.039862 | -7068 | 7.65E-05 | 1224 | 0.333333 | 0.018197 | PAH      |
| 3129.719 | 6.926855 | -7068 | 7.34E-05 | 590  | 0.333333 | 0.008928 | CLDN1    |
| 2492.171 | 7.889444 | -7068 | 7.29E-05 | 475  | 0.333333 | 0.007136 | NFU1     |
| 1037.109 | 9.585868 | -7068 | 7.17E-05 | 264  | 0.333333 | 0.003447 | ABHD11   |
| 1056.399 | 8.009442 | -7068 | 7.19E-05 | 298  | 0.333333 | 0.004145 | SLC35C2  |
| 4594.518 | 7.206361 | -7068 | 7.41E-05 | 701  | 0.333333 | 0.010995 | SURF4    |
| 5592.296 | 6.668026 | -7068 | 7.39E-05 | 761  | 0.333333 | 0.009617 | C3       |
| 699.8032 | 10.91496 | -7068 | 7.11E-05 | 182  | 0.333333 | 0.00215  | SNTG2    |
| 969.6827 | 10.17675 | -7068 | 7.16E-05 | 242  | 0.25     | 0.003371 | TEX15    |
| 1081.317 | 11.22086 | -7068 | 7.15E-05 | 218  | 0.333333 | 0.002445 | HOXB9    |
| 2870.518 | 8.860821 | -7068 | 7.28E-05 | 472  | 0.333333 | 0.006851 | OSBP2    |
| 1037.3   | 13.16386 | -7068 | 7.13E-05 | 184  | 0.333333 | 0.001923 | GPX5     |
| 9167.186 | 6.804288 | -7068 | 7.60E-05 | 1041 | 0.333333 | 0.016803 | FAR1     |
| 1361.688 | 7.512972 | -7068 | 7.21E-05 | 365  | 0.333333 | 0.005155 | SNIP1    |
| 3622.925 | 9.280694 | -7068 | 7.31E-05 | 506  | 0.333333 | 0.006913 | AVPI1    |
| 3700.874 | 8.476249 | -7068 | 7.33E-05 | 546  | 0.333333 | 0.007833 | SLC34A2  |
| 11326.85 | 8.831982 | -7068 | 7.55E-05 | 934  | 0.333333 | 0.013854 | THSD4    |
| 3611.042 | 8.935422 | -7068 | 7.30E-05 | 498  | 0.333333 | 0.00637  | RDH5     |
| 2227.4   | 9.021683 | -7068 | 7.25E-05 | 406  | 0.333333 | 0.006084 | USP53    |
| 733.0088 | 10.82461 | -7068 | 7.13E-05 | 194  | 0.333333 | 0.002618 | SDR9C7   |
| 1643.398 | 30.23898 | -7068 | 6.92E-05 | 88   | 0.333333 | 6.22E-04 | OR4C46   |
| 2327.735 | 9.888982 | -7068 | 7.25E-05 | 388  | 0.333333 | 0.00573  | FOXP3    |
| 7523.408 | 6.958479 | -7068 | 7.50E-05 | 897  | 0.333333 | 0.013189 | NUP35    |
| 4326.182 | 10.47239 | -7068 | 7.31E-05 | 509  | 0.333333 | 0.007389 | GSDMB    |
| 4836.251 | 7.783603 | -7068 | 7.36E-05 | 648  | 0.333333 | 0.00826  | ECI2     |
| 1492.598 | 9.477913 | -7068 | 7.21E-05 | 314  | 0.333333 | 0.004549 | CLDN11   |
| 1416.113 | 8.724393 | -7068 | 7.22E-05 | 337  | 0.333333 | 0.00512  | NHLRC2   |
| 1643.539 | 6.52327  | -7068 | 7.25E-05 | 410  | 0.333333 | 0.005223 | SLAMF8   |
| 9923.279 | 7.460173 | -7068 | 7.59E-05 | 1018 | 0.333333 | 0.016138 | SCO1     |
| 4926.15  | 7.127983 | -7068 | 7.39E-05 | 699  | 0.333333 | 0.009545 | C1QA     |
| 3582.544 | 6.945934 | -7068 | 7.35E-05 | 605  | 0.333333 | 0.008433 | TREM1    |
| 3133.56  | 7.871257 | -7068 | 7.31E-05 | 526  | 0.333333 | 0.007363 | MRPL27   |
| 4712.477 | 7.981862 | -7068 | 7.38E-05 | 651  | 0.333333 | 0.010313 | COX16    |
| 2987.567 | 7.735405 | -7068 | 7.32E-05 | 531  | 0.333333 | 0.007689 | NPLOC4   |
| 3895.992 | 9.243533 | -7068 | 7.31E-05 | 512  | 0.333333 | 0.007273 | BEX3     |
| 1631.895 | 6.538497 | -7068 | 7.24E-05 | 431  | 0.333333 | 0.006181 | WDR36    |

|          |          |       |          |      |          |          |          |
|----------|----------|-------|----------|------|----------|----------|----------|
| 1191.57  | 8.598618 | -7068 | 7.20E-05 | 314  | 0.333333 | 0.004836 | EIF5A2   |
| 10119.05 | 6.287877 | -7068 | 7.60E-05 | 1114 | 0.333333 | 0.01606  | NUF2     |
| 6564.906 | 6.859245 | -7068 | 7.42E-05 | 808  | 0.333333 | 0.010494 | ORM1     |
| 4216.05  | 10.63941 | -7068 | 7.29E-05 | 485  | 0.333333 | 0.006262 | LIME1    |
| 1827.048 | 7.89657  | -7068 | 7.26E-05 | 418  | 0.333333 | 0.006613 | GNPNAT1  |
| 3189.359 | 6.191817 | -7068 | 7.34E-05 | 617  | 0.333333 | 0.008519 | MS4A7    |
| 3365.388 | 11.01587 | -7068 | 7.28E-05 | 461  | 0.333333 | 0.007477 | FBXO11   |
| 4871.03  | 5.904116 | -7068 | 7.40E-05 | 774  | 0.333333 | 0.009839 | APOA2    |
| 6506.428 | 8.469073 | -7068 | 7.44E-05 | 741  | 0.333333 | 0.011431 | SLC13A4  |
| 2843.405 | 7.067089 | -7068 | 7.33E-05 | 551  | 0.333333 | 0.008088 | MRPS18A  |
| 5472.465 | 8.632884 | -7068 | 7.38E-05 | 647  | 0.333333 | 0.008372 | CIDEB    |
| 3814.82  | 8.213395 | -7068 | 7.35E-05 | 574  | 0.333333 | 0.008507 | PDXP     |
| 312.7923 | 10.82774 | -7068 | 7.05E-05 | 130  | 0.333333 | 0.001612 | TMEM107  |
| 2931.157 | 10.14427 | -7068 | 7.29E-05 | 446  | 0.333333 | 0.006312 | REEP4    |
| 1659.452 | 8.155716 | -7068 | 7.23E-05 | 373  | 0.333333 | 0.005175 | AKT1S1   |
| 4433.806 | 6.025757 | -7068 | 7.41E-05 | 760  | 0.333333 | 0.011041 | CKAP2    |
| 12577.68 | 7.082272 | -7068 | 7.65E-05 | 1166 | 0.333333 | 0.017653 | NNMT     |
| 1972.585 | 8.396859 | -7068 | 7.25E-05 | 410  | 0.333333 | 0.005933 | PRR13    |
| 8897.943 | 6.684971 | -7068 | 7.57E-05 | 1029 | 0.333333 | 0.015563 | DEPDC1   |
| 8568.883 | 7.480567 | -7068 | 7.56E-05 | 942  | 0.333333 | 0.015005 | PRDM16   |
| 8078.864 | 7.036331 | -7068 | 7.52E-05 | 924  | 0.333333 | 0.014412 | SYT7     |
| 3328.451 | 7.130718 | -7068 | 7.36E-05 | 609  | 0.333333 | 0.009553 | VMP1     |
| 4110.002 | 7.249201 | -7068 | 7.36E-05 | 651  | 0.333333 | 0.009694 | NOD1     |
| 4164.395 | 7.034021 | -7068 | 7.40E-05 | 685  | 0.333333 | 0.010927 | ATP8B4   |
| 1799.878 | 4.856345 | -7068 | 7.28E-05 | 555  | 0.333333 | 0.007362 | RBMX     |
| 3654.962 | 7.765992 | -7068 | 7.33E-05 | 579  | 0.333333 | 0.008044 | TRIP6    |
| 2849.629 | 8.59218  | -7068 | 7.30E-05 | 489  | 0.333333 | 0.007358 | SLC25A19 |
| 44.96907 | 8.248968 | -7068 | 6.95E-05 | 63   | 0.333333 | 9.77E-04 | SNURF    |
| 1325.233 | 6.779902 | -7068 | 7.24E-05 | 393  | 0.333333 | 0.005998 | NSMCE4A  |
| 2696.328 | 9.282103 | -7068 | 7.27E-05 | 437  | 0.333333 | 0.006116 | FOXRED2  |
| 2582.693 | 7.09691  | -7068 | 7.32E-05 | 528  | 0.333333 | 0.00829  | NKAP     |
| 1432.073 | 8.220432 | -7068 | 7.22E-05 | 358  | 0.333333 | 0.005391 | DCAF10   |
| 815.2444 | 13.59926 | -7068 | 7.11E-05 | 165  | 0.333333 | 0.001974 | VAX2     |
| 2043.095 | 12.97326 | -7068 | 7.18E-05 | 267  | 0.333333 | 0.003126 | ASCL3    |
| 5959.966 | 7.640362 | -7068 | 7.42E-05 | 739  | 0.333333 | 0.010465 | RHCG     |
| 7849.712 | 6.923703 | -7068 | 7.55E-05 | 955  | 0.333333 | 0.015469 | SMG1     |
| 377.342  | 9.430768 | -7068 | 7.06E-05 | 146  | 0.333333 | 0.001658 | DEFB4A   |
| 4084.308 | 8.943429 | -7068 | 7.33E-05 | 555  | 0.333333 | 0.008011 | UPK3B    |
| 3592.919 | 7.486977 | -7068 | 7.36E-05 | 603  | 0.333333 | 0.009197 | PDCD1LG2 |
| 2799.985 | 7.066693 | -7068 | 7.32E-05 | 545  | 0.333333 | 0.008021 | PCOLCE2  |
| 4918.018 | 6.746001 | -7068 | 7.42E-05 | 756  | 0.333333 | 0.011358 | RAB10    |

|          |          |       |          |      |          |          |           |
|----------|----------|-------|----------|------|----------|----------|-----------|
| 1078.512 | 8.772492 | -7068 | 7.20E-05 | 297  | 0.333333 | 0.004492 | FBXL20    |
| 1429.251 | 8.421983 | -7068 | 7.19E-05 | 328  | 0.333333 | 0.004891 | RNF219    |
| 1612.763 | 6.855359 | -7068 | 7.27E-05 | 436  | 0.333333 | 0.006865 | UBE2V1    |
| 1620.368 | 6.555273 | -7068 | 7.27E-05 | 442  | 0.333333 | 0.006923 | WBP11     |
| 19953.22 | 7.02068  | -7068 | 7.88E-05 | 1500 | 0.333333 | 0.024289 | FMNL2     |
| 1910.653 | 10.72633 | -7068 | 7.20E-05 | 314  | 0.25     | 0.004358 | ENPP5     |
| 2264.024 | 7.872431 | -7068 | 7.28E-05 | 463  | 0.333333 | 0.007168 | YOD1      |
| 1416.673 | 9.167093 | -7068 | 7.20E-05 | 325  | 0.333333 | 0.004626 | NT5DC3    |
| 3977.947 | 8.060926 | -7068 | 7.34E-05 | 572  | 0.333333 | 0.008007 | AP1M2     |
| 3173.52  | 9.981102 | -7068 | 7.29E-05 | 461  | 0.333333 | 0.006739 | MARS2     |
| 1682.264 | 8.254363 | -7068 | 7.24E-05 | 385  | 0.333333 | 0.005879 | RAB2B     |
| 2527.194 | 8.961666 | -7068 | 7.27E-05 | 433  | 0.333333 | 0.006169 | BCAN      |
| 1417.152 | 9.382292 | -7068 | 7.19E-05 | 299  | 0.333333 | 0.003905 | NTM       |
| 7899.961 | 7.975035 | -7068 | 7.49E-05 | 849  | 0.333333 | 0.013272 | IL1RAPL1  |
| 2909.476 | 7.530134 | -7068 | 7.34E-05 | 547  | 0.333333 | 0.009048 | WNT10A    |
| 387.4317 | 7.140307 | -7068 | 7.13E-05 | 199  | 0.333333 | 0.002787 | EHBP1L1   |
| 3448.023 | 8.343204 | -7068 | 7.33E-05 | 545  | 0.333333 | 0.008138 | RTP4      |
| 9795.597 | 8.430985 | -7068 | 7.48E-05 | 894  | 0.333333 | 0.013006 | NDUFB4    |
| 8065.154 | 6.948726 | -7068 | 7.53E-05 | 954  | 0.333333 | 0.014556 | E2F8      |
| 2996.688 | 7.801964 | -7068 | 7.33E-05 | 535  | 0.333333 | 0.008172 | ILKAP     |
| 1308.835 | 9.52176  | -7068 | 7.19E-05 | 297  | 0.333333 | 0.004213 | PLPPR2    |
| 2359.468 | 7.715611 | -7068 | 7.28E-05 | 466  | 0.333333 | 0.006573 | TNFRSF12A |
| 9832.817 | 7.616209 | -7068 | 7.58E-05 | 986  | 0.333333 | 0.015828 | HRH4      |
| 9289.191 | 7.012216 | -7068 | 7.59E-05 | 1028 | 0.333333 | 0.015946 | MGST1     |
| 1811.913 | 6.424867 | -7068 | 7.28E-05 | 467  | 0.333333 | 0.007143 | MCOLN3    |
| 4329.161 | 8.050137 | -7068 | 7.37E-05 | 627  | 0.25     | 0.009696 | CRB1      |
| 630.815  | 8.097502 | -7068 | 7.13E-05 | 221  | 0.333333 | 0.003177 | CISD2     |
| 2748.248 | 7.900109 | -7068 | 7.30E-05 | 490  | 0.333333 | 0.007092 | TMX2      |
| 1246.317 | 7.835444 | -7068 | 7.19E-05 | 315  | 0.333333 | 0.003641 | XAB2      |
| 14597.33 | 6.921694 | -7068 | 7.76E-05 | 1295 | 0.333333 | 0.020952 | VPS13C    |
| 2769.043 | 7.165371 | -7068 | 7.32E-05 | 543  | 0.333333 | 0.008309 | PRMT6     |
| 3713.689 | 15.79487 | -7068 | 7.21E-05 | 345  | 0.333333 | 0.004293 | ZNF747    |
| 1801.394 | 13.76339 | -7068 | 7.17E-05 | 244  | 0.333333 | 0.00276  | TRIM17    |
| 1938.931 | 9.339177 | -7068 | 7.23E-05 | 363  | 0.333333 | 0.005043 | NYNRIN    |
| 4338.726 | 12.9705  | -7068 | 7.26E-05 | 394  | 0.333333 | 0.004587 | FXYP7     |
| 3003.97  | 9.151126 | -7068 | 7.26E-05 | 445  | 0.333333 | 0.005667 | TMPPRS3   |
| 6263.469 | 7.220007 | -7068 | 7.48E-05 | 833  | 0.333333 | 0.013223 | UCK2      |
| 2604.81  | 7.859635 | -7068 | 7.30E-05 | 495  | 0.333333 | 0.007453 | ESRP2     |
| 2798.732 | 8.023632 | -7068 | 7.31E-05 | 501  | 0.333333 | 0.007475 | ABHD6     |
| 2942.349 | 7.905362 | -7068 | 7.29E-05 | 496  | 0.333333 | 0.007451 | HEY2      |
| 1490.281 | 7.79978  | -7068 | 7.22E-05 | 362  | 0.333333 | 0.004769 | TRAPPC2L  |

|          |          |       |          |      |          |          |          |
|----------|----------|-------|----------|------|----------|----------|----------|
| 4270.481 | 7.923145 | -7068 | 7.36E-05 | 621  | 0.333333 | 0.00871  | LSM10    |
| 1893.678 | 8.577525 | -7068 | 7.24E-05 | 395  | 0.333333 | 0.005863 | SOX17    |
| 4393.549 | 8.530342 | -7068 | 7.35E-05 | 597  | 0.333333 | 0.008779 | RIPK4    |
| 6077.728 | 6.533141 | -7068 | 7.48E-05 | 861  | 0.333333 | 0.012912 | PABPC4   |
| 2523.966 | 7.049366 | -7068 | 7.33E-05 | 539  | 0.333333 | 0.008736 | NGLY1    |
| 4183.684 | 7.552002 | -7068 | 7.38E-05 | 645  | 0.333333 | 0.009808 | NT5C3A   |
| 4633.416 | 5.910071 | -7068 | 7.40E-05 | 763  | 0.333333 | 0.009987 | CDCA8    |
| 1610.11  | 7.816463 | -7068 | 7.22E-05 | 360  | 0.25     | 0.004375 | FTCD     |
| 2029.678 | 7.260654 | -7068 | 7.28E-05 | 459  | 0.333333 | 0.006713 | AP2A1    |
| 5045.673 | 7.393049 | -7068 | 7.42E-05 | 713  | 0.333333 | 0.011179 | KMT2C    |
| 5466.551 | 7.02821  | -7068 | 7.44E-05 | 774  | 0.333333 | 0.011779 | DLL1     |
| 4831.031 | 7.887412 | -7068 | 7.40E-05 | 667  | 0.333333 | 0.010307 | AMMECR1L |
| 3782.43  | 7.376847 | -7068 | 7.36E-05 | 629  | 0.333333 | 0.009481 | FIP1L1   |
| 2358.621 | 7.936664 | -7068 | 7.30E-05 | 478  | 0.333333 | 0.007986 | POLN     |
| 2199.028 | 15.20178 | -7068 | 7.18E-05 | 259  | 0.333333 | 0.003463 | TAF7L    |
| 2995.866 | 6.259312 | -7068 | 7.33E-05 | 596  | 0.333333 | 0.008481 | HJURP    |
| 3041.948 | 7.250983 | -7068 | 7.34E-05 | 575  | 0.333333 | 0.009003 | GLYR1    |
| 2164.721 | 10.2166  | -7068 | 7.23E-05 | 361  | 0.333333 | 0.005033 | TNMD     |
| 1483.011 | 12.3804  | -7068 | 7.14E-05 | 221  | 0.25     | 0.002573 | LRRC46   |
| 2544.359 | 7.513343 | -7068 | 7.28E-05 | 493  | 0.25     | 0.007386 | SLC44A4  |
| 2395.161 | 10.09525 | -7068 | 7.26E-05 | 397  | 0.333333 | 0.005929 | TXNL4B   |
| 4337.858 | 7.603766 | -7068 | 7.37E-05 | 652  | 0.333333 | 0.009583 | TUBB6    |
| 3709.279 | 9.52335  | -7068 | 7.30E-05 | 506  | 0.333333 | 0.007113 | PSRC1    |
| 10899.8  | 6.723879 | -7068 | 7.63E-05 | 1128 | 0.333333 | 0.017333 | RACGAP1  |
| 8967.962 | 8.049528 | -7068 | 7.53E-05 | 905  | 0.333333 | 0.014246 | NOX5     |
| 7354.152 | 7.406223 | -7068 | 7.52E-05 | 888  | 0.333333 | 0.014416 | EVA1A    |
| 6255.028 | 8.158098 | -7068 | 7.44E-05 | 747  | 0.333333 | 0.011248 | STEAP3   |
| 3813.952 | 6.983246 | -7068 | 7.37E-05 | 639  | 0.333333 | 0.00955  | CEP55    |
| 8301.121 | 7.169655 | -7068 | 7.55E-05 | 952  | 0.333333 | 0.015227 | RSPO3    |
| 1825.887 | 11.05814 | -7068 | 7.20E-05 | 310  | 0.333333 | 0.00378  | FBRS     |
| 2932.676 | 7.448666 | -7068 | 7.34E-05 | 556  | 0.333333 | 0.008927 | AXIN2    |
| 4254.494 | 6.884479 | -7068 | 7.41E-05 | 708  | 0.333333 | 0.011196 | RCC2     |
| 3816.197 | 6.941034 | -7068 | 7.39E-05 | 661  | 0.333333 | 0.010433 | PKIB     |
| 4883.343 | 7.802828 | -7068 | 7.40E-05 | 681  | 0.333333 | 0.010182 | PAK6     |
| 1578.641 | 7.881212 | -7068 | 7.22E-05 | 370  | 0.333333 | 0.004749 | MCOLN1   |
| 3213.138 | 9.788928 | -7068 | 7.28E-05 | 464  | 0.333333 | 0.006922 | CHRA1    |
| 3472.203 | 6.162299 | -7068 | 7.38E-05 | 677  | 0.333333 | 0.010629 | TNS1     |
| 499.1774 | 8.324748 | -7068 | 7.11E-05 | 196  | 0.333333 | 0.002478 | MMP28    |
| 1039.999 | 11.12018 | -7068 | 7.15E-05 | 224  | 0.333333 | 0.002869 | PROK1    |
| 15074.05 | 6.89565  | -7068 | 7.71E-05 | 1284 | 0.333333 | 0.019253 | TLR4     |
| 1658.926 | 8.922299 | -7068 | 7.22E-05 | 356  | 0.333333 | 0.005329 | SNX24    |

|          |          |       |          |      |          |          |          |
|----------|----------|-------|----------|------|----------|----------|----------|
| 4199.232 | 8.459946 | -7068 | 7.34E-05 | 589  | 0.333333 | 0.008424 | RBM34    |
| 2044.912 | 8.543375 | -7068 | 7.26E-05 | 410  | 0.333333 | 0.00593  | STRA6    |
| 3321.575 | 6.024311 | -7068 | 7.39E-05 | 679  | 0.333333 | 0.010575 | ATAD2    |
| 8881.365 | 7.088301 | -7068 | 7.59E-05 | 1002 | 0.333333 | 0.016627 | NALCN    |
| 3836.703 | 14.01053 | -7068 | 7.25E-05 | 380  | 0.333333 | 0.005532 | NOX3     |
| 1267.865 | 11.15291 | -7068 | 7.18E-05 | 261  | 0.333333 | 0.003505 | ZSWIM3   |
| 2435.788 | 6.842715 | -7068 | 7.29E-05 | 513  | 0.333333 | 0.007344 | DDX47    |
| 1326.593 | 7.231997 | -7068 | 7.23E-05 | 376  | 0.25     | 0.005937 | NTN4     |
| 4209.409 | 8.712003 | -7068 | 7.32E-05 | 565  | 0.333333 | 0.007591 | RAB20    |
| 1774.014 | 9.980012 | -7068 | 7.21E-05 | 334  | 0.333333 | 0.004555 | ATP13A2  |
| 2417.733 | 12.12659 | -7068 | 7.20E-05 | 309  | 0.333333 | 0.00337  | CCL24    |
| 3728.775 | 9.935185 | -7068 | 7.28E-05 | 478  | 0.333333 | 0.006525 | CLCF1    |
| 1051.972 | 9.238277 | -7068 | 7.17E-05 | 260  | 0.333333 | 0.003208 | USE1     |
| 2308.502 | 8.366725 | -7068 | 7.27E-05 | 439  | 0.333333 | 0.006225 | PPP1R13L |
| 2526.005 | 5.692603 | -7068 | 7.29E-05 | 558  | 0.333333 | 0.007113 | KIF18A   |
| 5049.316 | 8.67308  | -7068 | 7.38E-05 | 623  | 0.333333 | 0.009853 | ROPN1L   |
| 1709.463 | 9.12341  | -7068 | 7.23E-05 | 362  | 0.333333 | 0.005342 | PNPLA3   |
| 5760.493 | 8.28035  | -7068 | 7.40E-05 | 702  | 0.333333 | 0.01062  | TRPC4    |
| 3995.206 | 7.198385 | -7068 | 7.39E-05 | 660  | 0.333333 | 0.010259 | DEPTOR   |
| 1138.893 | 10.82404 | -7068 | 7.16E-05 | 240  | 0.333333 | 0.003447 | SIX5     |
| 3213.982 | 7.04324  | -7068 | 7.35E-05 | 603  | 0.333333 | 0.009714 | EPC1     |
| 4585.93  | 8.068429 | -7068 | 7.39E-05 | 651  | 0.333333 | 0.010135 | CYP2R1   |
| 3525.123 | 7.920596 | -7068 | 7.35E-05 | 574  | 0.333333 | 0.009089 | MAK      |
| 2971.034 | 8.669154 | -7068 | 7.30E-05 | 487  | 0.333333 | 0.007138 | PAQR5    |
| 1601.254 | 8.261806 | -7068 | 7.23E-05 | 378  | 0.333333 | 0.006081 | ZKSCAN2  |
| 1383.145 | 7.256461 | -7068 | 7.21E-05 | 365  | 0.333333 | 0.005356 | BRD7     |
| 2400.626 | 10.09388 | -7068 | 7.26E-05 | 408  | 0.333333 | 0.006029 | DBF4B    |
| 6949.998 | 6.726064 | -7068 | 7.53E-05 | 923  | 0.333333 | 0.014904 | PPHLN1   |
| 1892.501 | 7.827557 | -7068 | 7.24E-05 | 402  | 0.333333 | 0.005434 | SDHAF2   |
| 2811.649 | 7.790856 | -7068 | 7.31E-05 | 519  | 0.333333 | 0.007906 | ANO1     |
| 3686.289 | 8.73825  | -7068 | 7.31E-05 | 526  | 0.333333 | 0.007772 | HAUS1    |
| 995.3308 | 4.93857  | -7068 | 7.22E-05 | 403  | 0.333333 | 0.005175 | RPL28    |
| 3191.326 | 6.165039 | -7068 | 7.32E-05 | 624  | 0.333333 | 0.008389 | EEF1G    |
| 1851.908 | 10.43427 | -7068 | 7.20E-05 | 320  | 0.333333 | 0.004076 | TBX4     |
| 1190.199 | 13.8221  | -7068 | 7.13E-05 | 201  | 0.25     | 0.002489 | ZCWPW1   |
| 6799.583 | 6.900667 | -7068 | 7.50E-05 | 886  | 0.333333 | 0.013935 | ANTXR2   |
| 1189.44  | 8.352559 | -7068 | 7.19E-05 | 305  | 0.333333 | 0.004197 | PPP1R1B  |
| 2937.313 | 6.730134 | -7068 | 7.34E-05 | 593  | 0.333333 | 0.009038 | CD302    |
| 7285.41  | 6.748775 | -7068 | 7.54E-05 | 937  | 0.333333 | 0.015303 | STXBP6   |
| 195.0881 | 10.86053 | -7068 | 7.00E-05 | 93   | 0.333333 | 0.001321 | GXYLT1   |
| 103.3929 | 11.161   | -7068 | 6.98E-05 | 64   | 0.333333 | 8.88E-04 | B3GLCT   |

|          |          |       |          |      |          |          |           |
|----------|----------|-------|----------|------|----------|----------|-----------|
| 2178.774 | 7.889766 | -7068 | 7.27E-05 | 453  | 0.333333 | 0.006931 | RBM23     |
| 2589.901 | 8.103071 | -7068 | 7.29E-05 | 480  | 0.333333 | 0.007515 | ALG1      |
| 2428.351 | 8.635999 | -7068 | 7.27E-05 | 442  | 0.333333 | 0.006502 | TSPAN13   |
| 2180.342 | 7.641141 | -7068 | 7.24E-05 | 414  | 0.333333 | 0.004717 | RETN      |
| 2640.556 | 8.737885 | -7068 | 7.23E-05 | 401  | 0.333333 | 0.004112 | PRG3      |
| 3718.237 | 8.260785 | -7068 | 7.36E-05 | 577  | 0.333333 | 0.009132 | MAP1LC3C  |
| 3675.587 | 7.493026 | -7068 | 7.34E-05 | 599  | 0.333333 | 0.008711 | LIPG      |
| 1275.164 | 8.10194  | -7068 | 7.21E-05 | 324  | 0.333333 | 0.004428 | DGAT2     |
| 3273.326 | 7.746855 | -7068 | 7.33E-05 | 543  | 0.333333 | 0.007535 | SCPEP1    |
| 1786.087 | 7.540074 | -7068 | 7.26E-05 | 422  | 0.333333 | 0.006444 | CAB39L    |
| 8996.424 | 7.176374 | -7068 | 7.57E-05 | 986  | 0.333333 | 0.01605  | WDSUB1    |
| 3014.72  | 5.581611 | -7068 | 7.35E-05 | 644  | 0.333333 | 0.008838 | DTL       |
| 1494.251 | 7.605488 | -7068 | 7.23E-05 | 378  | 0.333333 | 0.005736 | NIPSNAP3B |
| 1359.068 | 6.977226 | -7068 | 7.11E-05 | 268  | 0.25     | 0.002041 | ZNF225    |
| 5601.337 | 7.309746 | -7068 | 7.45E-05 | 776  | 0.333333 | 0.012183 | GJB2      |
| 4153.393 | 8.026765 | -7068 | 7.32E-05 | 592  | 0.333333 | 0.007378 | PRR11     |
| 7252.227 | 7.809927 | -7068 | 7.48E-05 | 829  | 0.333333 | 0.012117 | ATPIF1    |
| 3583.255 | 5.136315 | -7068 | 7.37E-05 | 726  | 0.333333 | 0.00942  | NUSAP1    |
| 2159.655 | 8.068607 | -7068 | 7.25E-05 | 431  | 0.25     | 0.006064 | RBKS      |
| 926.2656 | 6.14732  | -7068 | 7.18E-05 | 316  | 0.25     | 0.003864 | GSTA2     |
| 338.051  | 8.380142 | -7068 | 7.09E-05 | 166  | 0.333333 | 0.002406 | PTPMT1    |
| 3200.427 | 8.456363 | -7068 | 7.28E-05 | 483  | 0.333333 | 0.006365 | NAA20     |
| 1652.387 | 8.306831 | -7068 | 7.23E-05 | 368  | 0.333333 | 0.005323 | DMKN      |
| 10359.46 | 7.225066 | -7068 | 7.61E-05 | 1058 | 0.333333 | 0.01681  | STT3B     |
| 3905.167 | 9.726651 | -7068 | 7.31E-05 | 497  | 0.333333 | 0.00722  | TRPM4     |
| 3547.306 | 6.749711 | -7068 | 7.36E-05 | 638  | 0.333333 | 0.009746 | RGCC      |
| 2084.575 | 7.378883 | -7068 | 7.28E-05 | 456  | 0.333333 | 0.006975 | RAB33B    |
| 1226.151 | 7.761807 | -7068 | 7.20E-05 | 331  | 0.333333 | 0.004613 | TRUB2     |
| 2255.341 | 8.602144 | -7068 | 7.26E-05 | 402  | 0.333333 | 0.005311 | CALML5    |
| 2572.128 | 9.298326 | -7068 | 7.26E-05 | 419  | 0.333333 | 0.006256 | CCDC170   |
| 2382.392 | 6.931435 | -7068 | 7.30E-05 | 517  | 0.333333 | 0.007843 | ARL5A     |
| 770.5503 | 7.348816 | -7068 | 7.18E-05 | 284  | 0.333333 | 0.004211 | ALG9      |
| 983.4469 | 12.61367 | -7068 | 7.13E-05 | 202  | 0.333333 | 0.002285 | ESPN      |
| 4578.283 | 8.368774 | -7068 | 7.32E-05 | 566  | 0.333333 | 0.006672 | CRYL1     |
| 3268.795 | 7.889515 | -7068 | 7.32E-05 | 538  | 0.333333 | 0.007703 | LYVE1     |
| 4977.636 | 9.969278 | -7068 | 7.34E-05 | 559  | 0.333333 | 0.008144 | CHRM1     |
| 8333.579 | 7.513334 | -7068 | 7.51E-05 | 908  | 0.333333 | 0.013786 | LNX1      |
| 652.3467 | 7.857739 | -7068 | 7.16E-05 | 247  | 0.333333 | 0.00394  | STEAP2    |
| 560.7469 | 7.19139  | -7068 | 7.13E-05 | 222  | 0.333333 | 0.002862 | ZC3H12A   |
| 2669.645 | 6.835901 | -7068 | 7.28E-05 | 522  | 0.333333 | 0.007072 | EHF       |
| 7488.161 | 6.770064 | -7068 | 7.55E-05 | 947  | 0.333333 | 0.015225 | SPATS2L   |

|          |          |       |          |      |          |          |          |
|----------|----------|-------|----------|------|----------|----------|----------|
| 2044.129 | 7.90341  | -7068 | 7.27E-05 | 438  | 0.333333 | 0.006732 | HKDC1    |
| 2637.008 | 7.643028 | -7068 | 7.31E-05 | 510  | 0.333333 | 0.007896 | BRI3BP   |
| 2981.618 | 12.36504 | -7068 | 7.23E-05 | 374  | 0.25     | 0.005353 | FAXDC2   |
| 4635.858 | 7.164542 | -7068 | 7.42E-05 | 711  | 0.333333 | 0.01128  | EPB41L4A |
| 4402.941 | 8.431297 | -7068 | 7.38E-05 | 616  | 0.333333 | 0.009398 | TBC1D2   |
| 284.7679 | 9.048195 | -7068 | 7.08E-05 | 143  | 0.25     | 0.001956 | SLC25A27 |
| 2947.435 | 9.532109 | -7068 | 7.20E-05 | 368  | 0.333333 | 0.003905 | ZFP14    |
| 5282.628 | 11.22704 | -7068 | 7.24E-05 | 451  | 0.333333 | 0.004203 | ZNF611   |
| 1969.335 | 8.537291 | -7068 | 7.26E-05 | 397  | 0.333333 | 0.00595  | CTRB1    |
| 1555.68  | 11.00624 | -7068 | 7.17E-05 | 273  | 0.333333 | 0.003052 | WDR24    |
| 24501.02 | 7.263183 | -7068 | 7.98E-05 | 1639 | 0.333333 | 0.027113 | HS3ST4   |
| 1755.969 | 8.338037 | -7068 | 7.24E-05 | 389  | 0.25     | 0.005644 | C3orf52  |
| 182.7004 | 6.732438 | -7068 | 7.08E-05 | 149  | 0.25     | 0.002438 | CA13     |
| 7106.608 | 10.45782 | -7068 | 7.38E-05 | 651  | 0.333333 | 0.009627 | RBP2     |
| 1520.973 | 8.58307  | -7068 | 7.23E-05 | 361  | 0.333333 | 0.005424 | ADCK2    |
| 12948.84 | 7.199854 | -7068 | 7.69E-05 | 1188 | 0.333333 | 0.019163 | MTHFD1L  |
| 5091.081 | 9.328934 | -7068 | 7.32E-05 | 554  | 0.333333 | 0.006609 | GPR87    |
| 1078.137 | 11.65267 | -7068 | 7.13E-05 | 202  | 0.25     | 0.002124 | GSC2     |
| 3024.48  | 10.04783 | -7068 | 7.26E-05 | 420  | 0.333333 | 0.005111 | SIGIRR   |
| 2063.358 | 11.38228 | -7068 | 7.21E-05 | 321  | 0.333333 | 0.004381 | ADAP1    |
| 2080.317 | 8.339949 | -7068 | 7.24E-05 | 407  | 0.333333 | 0.00548  | NOX4     |
| 5060.954 | 7.545074 | -7068 | 7.38E-05 | 679  | 0.333333 | 0.009199 | ABCG5    |
| 2862.801 | 9.688825 | -7068 | 7.24E-05 | 419  | 0.333333 | 0.005539 | PILRA    |
| 13871.49 | 6.641133 | -7068 | 7.74E-05 | 1297 | 0.333333 | 0.020919 | TMEM135  |
| 3614.549 | 7.94569  | -7068 | 7.33E-05 | 576  | 0.333333 | 0.008449 | COX17    |
| 2681.534 | 11.18576 | -7068 | 7.22E-05 | 357  | 0.333333 | 0.00466  | MAGIX    |
| 2902.369 | 8.522199 | -7068 | 7.28E-05 | 484  | 0.333333 | 0.006408 | MSRB1    |
| 7436.201 | 7.290967 | -7068 | 7.52E-05 | 884  | 0.333333 | 0.014521 | HERC3    |
| 6772.062 | 7.601966 | -7068 | 7.47E-05 | 813  | 0.333333 | 0.012519 | SEMA6D   |
| 2930.173 | 9.368886 | -7068 | 7.27E-05 | 450  | 0.333333 | 0.006561 | DCP1B    |
| 5271.872 | 8.063271 | -7068 | 7.41E-05 | 689  | 0.333333 | 0.011298 | SPTSSB   |
| 1998.164 | 10.38915 | -7068 | 7.21E-05 | 335  | 0.333333 | 0.004366 | PIGZ     |
| 591.9717 | 7.91592  | -7068 | 7.16E-05 | 236  | 0.333333 | 0.003755 | ADIG     |
| 2020.927 | 10.99732 | -7068 | 7.21E-05 | 322  | 0.333333 | 0.004447 | INSRR    |
| 5760.349 | 9.412423 | -7068 | 7.35E-05 | 634  | 0.333333 | 0.008921 | NDUFS8   |
| 1275.001 | 7.984957 | -7068 | 7.18E-05 | 313  | 0.333333 | 0.003818 | HSH2D    |
| 5296.597 | 8.275863 | -7068 | 7.41E-05 | 692  | 0.333333 | 0.01078  | NABP1    |
| 5663.722 | 7.286759 | -7068 | 7.44E-05 | 765  | 0.333333 | 0.011519 | PSTPIP2  |
| 3047.12  | 8.682075 | -7068 | 7.30E-05 | 492  | 0.333333 | 0.007001 | ZDHC5    |
| 3562.262 | 8.120754 | -7068 | 7.25E-05 | 466  | 0.333333 | 0.005255 | ZNF675   |
| 3315.343 | 6.672882 | -7068 | 7.35E-05 | 621  | 0.25     | 0.009205 | DRAM1    |

|          |          |       |          |      |          |          |          |
|----------|----------|-------|----------|------|----------|----------|----------|
| 2153.106 | 10.60058 | -7068 | 7.22E-05 | 356  | 0.333333 | 0.00526  | HOXA3    |
| 4041.99  | 7.788224 | -7068 | 7.36E-05 | 620  | 0.333333 | 0.009792 | CRISPLD1 |
| 9906.201 | 9.436387 | -7068 | 7.48E-05 | 855  | 0.333333 | 0.012723 | NDUFA10  |
| 1429.168 | 12.62365 | -7068 | 7.17E-05 | 245  | 0.333333 | 0.00325  | PRSS50   |
| 6192.501 | 6.881419 | -7068 | 7.46E-05 | 828  | 0.333333 | 0.012592 | GRHL1    |
| 2650.051 | 9.682939 | -7068 | 7.24E-05 | 400  | 0.333333 | 0.005279 | HEMGN    |
| 1456.202 | 8.591576 | -7068 | 7.21E-05 | 348  | 0.333333 | 0.005198 | NCOA5    |
| 2916.781 | 10.74498 | -7068 | 7.26E-05 | 394  | 0.333333 | 0.005315 | RASAL1   |
| 5049.235 | 7.36169  | -7068 | 7.40E-05 | 711  | 0.333333 | 0.010447 | RNF128   |
| 6044.17  | 8.231536 | -7068 | 7.41E-05 | 710  | 0.333333 | 0.010831 | TMEM45B  |
| 836.395  | 9.869204 | -7068 | 7.14E-05 | 232  | 0.333333 | 0.003183 | ELP5     |
| 76.46297 | 8.143088 | -7068 | 7.02E-05 | 80   | 0.333333 | 0.001192 | AMOTL1   |
| 5901.533 | 7.017354 | -7068 | 7.46E-05 | 802  | 0.333333 | 0.012551 | COLEC12  |
| 4050.028 | 7.195405 | -7068 | 7.37E-05 | 654  | 0.333333 | 0.009726 | F11R     |
| 82.23272 | 6.956552 | -7068 | 7.00E-05 | 93   | 0.25     | 0.001451 | SPIN4    |
| 6518.049 | 7.937137 | -7068 | 7.44E-05 | 763  | 0.333333 | 0.011877 | LRRC1    |
| 1492.585 | 6.673868 | -7068 | 7.25E-05 | 428  | 0.333333 | 0.006537 | STK26    |
| 12499.63 | 34.24511 | -7068 | 7.22E-05 | 332  | 0.333333 | 0.003898 | OR10J1   |
| 4923.48  | 5.455817 | -7068 | 7.43E-05 | 828  | 0.333333 | 0.011141 | UBE2T    |
| 2649.49  | 7.891384 | -7068 | 7.30E-05 | 491  | 0.333333 | 0.007398 | GNPTG    |
| 1877.802 | 8.660895 | -7068 | 7.23E-05 | 380  | 0.333333 | 0.005174 | ATP5E    |
| 2867.337 | 10.732   | -7068 | 7.24E-05 | 386  | 0.333333 | 0.004831 | KRT24    |
| 16498.46 | 7.85526  | -7068 | 7.73E-05 | 1258 | 0.333333 | 0.019922 | TRPM3    |
| 2902.135 | 9.237233 | -7068 | 7.28E-05 | 452  | 0.333333 | 0.006243 | MAP1LC3A |
| 1780.659 | 7.160914 | -7068 | 7.26E-05 | 429  | 0.333333 | 0.006495 | CDCA4    |
| 1811.704 | 7.456956 | -7068 | 7.27E-05 | 433  | 0.333333 | 0.006835 | ATPAF1   |
| 7569.632 | 6.954469 | -7068 | 7.53E-05 | 924  | 0.333333 | 0.014784 | RAB18    |
| 643.7224 | 11.83332 | -7068 | 7.13E-05 | 169  | 0.333333 | 0.001962 | FN3K     |
| 5996.196 | 7.391827 | -7068 | 7.46E-05 | 787  | 0.333333 | 0.012767 | CCDC113  |
| 5638.753 | 7.577258 | -7068 | 7.43E-05 | 750  | 0.333333 | 0.011322 | EMILIN2  |
| 1354.413 | 8.465711 | -7068 | 7.20E-05 | 331  | 0.333333 | 0.004466 | IRAK4    |
| 1139.433 | 6.764252 | -7068 | 7.21E-05 | 349  | 0.333333 | 0.005153 | DNAAF5   |
| 4282.705 | 7.389514 | -7068 | 7.37E-05 | 660  | 0.333333 | 0.009823 | DDX58    |
| 1695.605 | 9.424548 | -7068 | 7.22E-05 | 338  | 0.333333 | 0.004438 | PGPEP1   |
| 6395.364 | 5.596002 | -7068 | 7.52E-05 | 973  | 0.333333 | 0.014799 | COL12A1  |
| 2655.777 | 10.47478 | -7068 | 7.23E-05 | 372  | 0.333333 | 0.004746 | FOXL2    |
| 3885.124 | 8.110559 | -7068 | 7.35E-05 | 581  | 0.333333 | 0.008487 | SNAI1    |
| 247.3002 | 10.63524 | -7068 | 7.08E-05 | 117  | 0.333333 | 0.001654 | TRABD2A  |
| 3119.736 | 8.861644 | -7068 | 7.29E-05 | 477  | 0.333333 | 0.006733 | CES3     |
| 81.22014 | 11.14371 | -7068 | 6.65E-05 | 53   | 0.25     | 4.51E-04 | WFDC13   |
| 15936.57 | 30.11043 | -7068 | 7.26E-05 | 409  | 0.333333 | 0.00428  | OR3A1    |



|          |          |       |          |      |          |          |         |
|----------|----------|-------|----------|------|----------|----------|---------|
| 2699.585 | 6.826404 | -7068 | 7.31E-05 | 544  | 0.333333 | 0.007919 | COL5A3  |
| 2681.074 | 5.150601 | -7068 | 7.35E-05 | 644  | 0.333333 | 0.009105 | GINS2   |
| 3093.269 | 10.20912 | -7068 | 7.28E-05 | 444  | 0.333333 | 0.006937 | GKAP1   |
| 2905.706 | 8.100208 | -7068 | 7.31E-05 | 516  | 0.333333 | 0.00786  | GRAMD1A |
| 5248.625 | 9.741766 | -7068 | 7.36E-05 | 599  | 0.333333 | 0.009377 | DCAKD   |
| 1319.476 | 10.24172 | -7068 | 7.18E-05 | 286  | 0.333333 | 0.004087 | BHLHB9  |
| 9058.123 | 7.557911 | -7068 | 7.54E-05 | 947  | 0.333333 | 0.014245 | HIBADH  |
| 3739.285 | 9.573031 | -7068 | 7.31E-05 | 505  | 0.333333 | 0.007616 | IRF2BPL |
| 1697.619 | 7.837598 | -7068 | 7.25E-05 | 402  | 0.333333 | 0.006401 | STRBP   |
| 318.1972 | 9.653771 | -7068 | 7.09E-05 | 142  | 0.333333 | 0.001719 | PGP     |
| 2020.853 | 10.25088 | -7068 | 7.21E-05 | 335  | 0.333333 | 0.00423  | B4GALT7 |
| 1478.957 | 8.290106 | -7068 | 7.21E-05 | 344  | 0.333333 | 0.004852 | TLR10   |
| 1648.444 | 7.340776 | -7068 | 7.25E-05 | 418  | 0.333333 | 0.006627 | CHMP3   |
| 1314.519 | 10.81818 | -7068 | 7.19E-05 | 271  | 0.333333 | 0.003417 | SLC35F6 |
| 1018.755 | 8.624957 | -7068 | 7.20E-05 | 292  | 0.333333 | 0.004545 | ARMC9   |
| 11812.03 | 6.681915 | -7068 | 7.68E-05 | 1189 | 0.333333 | 0.018857 | CRIM1   |
| 2842.894 | 8.829537 | -7068 | 7.29E-05 | 466  | 0.333333 | 0.006938 | ELMO3   |
| 906.9234 | 9.224699 | -7068 | 7.17E-05 | 247  | 0.333333 | 0.003178 | LRAT    |
| 3207.643 | 11.36242 | -7068 | 7.24E-05 | 381  | 0.333333 | 0.004919 | GPR27   |
| 2665.216 | 7.572634 | -7068 | 7.31E-05 | 521  | 0.333333 | 0.008007 | CCNK    |
| 2058.908 | 6.609145 | -7068 | 7.29E-05 | 502  | 0.333333 | 0.007672 | FADS1   |
| 3302.237 | 7.155881 | -7068 | 7.36E-05 | 604  | 0.333333 | 0.009768 | STARD4  |
| 1871.68  | 7.716461 | -7068 | 7.26E-05 | 419  | 0.333333 | 0.006462 | CCPG1   |
| 4459.284 | 6.448452 | -7068 | 7.43E-05 | 755  | 0.333333 | 0.012269 | FBXO30  |
| 600.6708 | 7.33459  | -7068 | 7.16E-05 | 239  | 0.333333 | 0.003471 | KRT6C   |
| 2355.352 | 6.125611 | -7068 | 7.28E-05 | 506  | 0.333333 | 0.006196 | KRT6B   |
| 1194.853 | 8.665001 | -7068 | 7.20E-05 | 311  | 0.333333 | 0.004608 | CCDC97  |
| 3653.403 | 7.626211 | -7068 | 7.37E-05 | 616  | 0.333333 | 0.009764 | HPS6    |
| 5334.64  | 8.158787 | -7068 | 7.39E-05 | 669  | 0.333333 | 0.010224 | OTX2    |
| 855.7083 | 7.09097  | -7068 | 7.18E-05 | 300  | 0.333333 | 0.004453 | KCTD10  |
| 1401.738 | 9.129126 | -7068 | 7.21E-05 | 330  | 0.333333 | 0.005055 | ZBTB2   |
| 5607.68  | 8.818958 | -7068 | 7.39E-05 | 659  | 0.25     | 0.009738 | ADGRF1  |
| 1302.646 | 10.60613 | -7068 | 7.19E-05 | 271  | 0.333333 | 0.003673 | SEC14L4 |
| 2888.002 | 8.864511 | -7068 | 7.30E-05 | 477  | 0.333333 | 0.007561 | CHRNA9  |
| 97.45671 | 8.152905 | -7068 | 6.96E-05 | 81   | 0.25     | 9.75E-04 | HBG2    |
| 721.362  | 6.498526 | -7068 | 7.16E-05 | 277  | 0.25     | 0.003752 | KLRK1   |
| 1899.961 | 6.948117 | -7068 | 7.29E-05 | 473  | 0.333333 | 0.008037 | LCLAT1  |
| 1615.119 | 9.086307 | -7068 | 7.21E-05 | 341  | 0.333333 | 0.004536 | SIRT6   |
| 6063.56  | 7.689778 | -7068 | 7.45E-05 | 771  | 0.333333 | 0.011518 | ATG7    |
| 2234.034 | 7.731155 | -7068 | 7.28E-05 | 459  | 0.333333 | 0.006993 | SEC11C  |
| 6405.904 | 6.760638 | -7068 | 7.49E-05 | 865  | 0.333333 | 0.013692 | CLEC3B  |

|          |          |       |          |      |          |          |           |
|----------|----------|-------|----------|------|----------|----------|-----------|
| 3329.359 | 5.912469 | -7068 | 7.37E-05 | 654  | 0.333333 | 0.009324 | KIF4A     |
| 2684.826 | 7.890311 | -7068 | 7.30E-05 | 502  | 0.333333 | 0.007736 | DNAJC27   |
| 2392.856 | 7.485309 | -7068 | 7.29E-05 | 475  | 0.333333 | 0.006517 | MAP7D1    |
| 800.0123 | 7.705124 | -7068 | 7.17E-05 | 265  | 0.333333 | 0.003919 | KANK2     |
| 1331.227 | 12.67941 | -7068 | 7.15E-05 | 224  | 0.333333 | 0.002606 | VSX1      |
| 1756.241 | 10.72372 | -7068 | 7.21E-05 | 316  | 0.333333 | 0.004088 | ACAD10    |
| 860.9461 | 8.362039 | -7068 | 7.14E-05 | 242  | 0.333333 | 0.002925 | ARL6IP4   |
| 2965.584 | 7.53389  | -7068 | 7.34E-05 | 559  | 0.333333 | 0.009158 | NTPCR     |
| 3671.446 | 8.629958 | -7068 | 7.33E-05 | 549  | 0.333333 | 0.0082   | SYAP1     |
| 4051.041 | 6.890631 | -7068 | 7.40E-05 | 690  | 0.333333 | 0.010652 | DIAPH3    |
| 8017.983 | 7.689237 | -7068 | 7.52E-05 | 887  | 0.333333 | 0.014039 | PALMD     |
| 1896.602 | 7.485995 | -7068 | 7.27E-05 | 439  | 0.333333 | 0.006589 | C1orf115  |
| 3103.293 | 7.374475 | -7068 | 7.34E-05 | 575  | 0.333333 | 0.009455 | SCN3A     |
| 2059.756 | 7.343047 | -7068 | 7.27E-05 | 460  | 0.333333 | 0.006985 | DERL1     |
| 1962.511 | 8.058389 | -7068 | 7.25E-05 | 407  | 0.333333 | 0.005583 | STEAP4    |
| 1850.656 | 9.548387 | -7068 | 7.23E-05 | 363  | 0.333333 | 0.005227 | HILPDA    |
| 7144.9   | 7.010112 | -7068 | 7.52E-05 | 898  | 0.333333 | 0.014406 | ARRDC3    |
| 823.3722 | 7.863437 | -7068 | 7.18E-05 | 280  | 0.333333 | 0.004204 | NDUFAF7   |
| 1816.742 | 9.195367 | -7068 | 7.20E-05 | 316  | 0.333333 | 0.003287 | NPHS2     |
| 2050.428 | 9.016573 | -7068 | 7.24E-05 | 388  | 0.333333 | 0.005648 | UNK       |
| 1709.391 | 6.974625 | -7068 | 7.25E-05 | 426  | 0.333333 | 0.006093 | VPS35     |
| 2467.438 | 9.838404 | -7068 | 7.25E-05 | 398  | 0.333333 | 0.005302 | DPP7      |
| 573.304  | 9.485885 | -7068 | 7.14E-05 | 197  | 0.333333 | 0.003106 | SH3PXD2B  |
| 5368.025 | 6.968601 | -7068 | 7.46E-05 | 786  | 0.333333 | 0.012871 | CTTNBP2NL |
| 1602.038 | 8.575855 | -7068 | 7.23E-05 | 367  | 0.25     | 0.005588 | THEM4     |
| 263.5334 | 7.832609 | -7068 | 7.11E-05 | 160  | 0.333333 | 0.002494 | FITM2     |
| 5280.415 | 8.884398 | -7068 | 7.39E-05 | 639  | 0.333333 | 0.00912  | SLC25A10  |
| 373.7227 | 10.75475 | -7068 | 7.05E-05 | 122  | 0.25     | 0.001189 | KIR2DS1   |
| 3739.508 | 9.842989 | -7068 | 7.26E-05 | 421  | 0.333333 | 0.004273 | KIR2DS2   |
| 3092.559 | 5.850835 | -7068 | 7.34E-05 | 652  | 0.25     | 0.009122 | MCM8      |
| 8659.552 | 6.728845 | -7068 | 7.56E-05 | 1002 | 0.333333 | 0.015618 | GPAT3     |
| 3069.736 | 7.894492 | -7068 | 7.31E-05 | 526  | 0.333333 | 0.007828 | GDA       |
| 1601.978 | 8.500206 | -7068 | 7.22E-05 | 350  | 0.333333 | 0.004828 | ADGRE3    |
| 1961.995 | 12.77908 | -7068 | 7.20E-05 | 292  | 0.333333 | 0.003655 | TIGD5     |
| 3242.721 | 13.29748 | -7068 | 7.22E-05 | 334  | 0.333333 | 0.003704 | MEFV      |
| 1814.512 | 7.78978  | -7068 | 7.15E-05 | 304  | 0.333333 | 0.002513 | ZNF256    |
| 5086.295 | 8.253136 | -7068 | 7.40E-05 | 673  | 0.333333 | 0.01061  | ZFP91     |
| 11365.38 | 7.534873 | -7068 | 7.63E-05 | 1074 | 0.333333 | 0.01742  | LRRN1     |
| 1986.524 | 9.808483 | -7068 | 7.23E-05 | 366  | 0.25     | 0.005533 | TRIM35    |
| 1764.783 | 6.751605 | -7068 | 7.28E-05 | 458  | 0.333333 | 0.007253 | PBDC1     |
| 331.2128 | 8.0033   | -7068 | 7.11E-05 | 171  | 0.333333 | 0.002674 | ZDHC2     |

|          |          |       |          |      |          |          |           |
|----------|----------|-------|----------|------|----------|----------|-----------|
| 11117.57 | 7.789956 | -7068 | 7.61E-05 | 1041 | 0.333333 | 0.016502 | ATE1      |
| 7946.86  | 7.037032 | -7068 | 7.55E-05 | 948  | 0.333333 | 0.0151   | ARID1B    |
| 3477.477 | 9.123672 | -7068 | 7.29E-05 | 492  | 0.333333 | 0.006508 | TAPBPL    |
| 1792.389 | 7.104276 | -7068 | 7.26E-05 | 432  | 0.333333 | 0.00645  | AP3M1     |
| 319.5726 | 8.133471 | -7068 | 7.10E-05 | 164  | 0.333333 | 0.002384 | KANSL1L   |
| 5414.801 | 9.011372 | -7068 | 7.33E-05 | 593  | 0.333333 | 0.008114 | ZNF44     |
| 4981.854 | 6.881805 | -7068 | 7.44E-05 | 759  | 0.333333 | 0.012017 | CARD11    |
| 4219.997 | 7.629215 | -7068 | 7.39E-05 | 649  | 0.333333 | 0.010607 | GALNT13   |
| 3989.007 | 8.356803 | -7068 | 7.34E-05 | 577  | 0.333333 | 0.008253 | ANGPTL4   |
| 1774.366 | 6.541682 | -7068 | 7.25E-05 | 456  | 0.333333 | 0.006461 | TNFRSF10A |
| 3287.95  | 7.874065 | -7068 | 7.34E-05 | 562  | 0.333333 | 0.008905 | WWC2      |
| 6201.017 | 6.938886 | -7068 | 7.49E-05 | 849  | 0.333333 | 0.013713 | CYYR1     |
| 775.777  | 8.29007  | -7068 | 7.16E-05 | 254  | 0.333333 | 0.003672 | PAGR1     |
| 45.78407 | 6.718994 | -7068 | 6.87E-05 | 61   | 0.25     | 6.74E-04 | CGB3      |
| 1930.968 | 8.83121  | -7068 | 7.20E-05 | 336  | 0.333333 | 0.003847 | LHB       |
| 793.6178 | 10.71879 | -7068 | 7.15E-05 | 212  | 0.333333 | 0.002957 | SLC30A6   |
| 795.1546 | 7.383355 | -7068 | 7.18E-05 | 287  | 0.333333 | 0.00429  | PCSK6     |
| 2430.203 | 7.793973 | -7068 | 7.28E-05 | 468  | 0.333333 | 0.006676 | CYP21A2   |
| 749.8226 | 10.02365 | -7068 | 7.15E-05 | 206  | 0.333333 | 0.002323 | SCT       |
| 1011.946 | 10.95071 | -7068 | 7.17E-05 | 241  | 0.333333 | 0.003285 | KCNK12    |
| 1451.774 | 6.038787 | -7068 | 7.24E-05 | 414  | 0.333333 | 0.005558 | IFI30     |
| 1179.178 | 6.940573 | -7068 | 7.20E-05 | 339  | 0.333333 | 0.004207 | DHRS4     |
| 1683.623 | 8.898281 | -7068 | 7.22E-05 | 358  | 0.333333 | 0.004974 | COX14     |
| 3553.242 | 9.279977 | -7068 | 7.31E-05 | 508  | 0.333333 | 0.007446 | PPP1R16A  |
| 849.2936 | 11.61891 | -7068 | 7.14E-05 | 196  | 0.333333 | 0.002244 | EDDM3B    |
| 6073.508 | 7.372539 | -7068 | 7.47E-05 | 804  | 0.333333 | 0.012776 | FGD3      |
| 16.32049 | 10.39624 | -7068 | 6.35E-05 | 26   | 0.25     | 2.54E-04 | RESP18    |
| 81.67584 | 10.75515 | -7068 | 6.97E-05 | 66   | 0.25     | 8.24E-04 | HS6ST2    |
| 1309.234 | 13.92888 | -7068 | 7.15E-05 | 206  | 0.333333 | 0.00242  | ULBP1     |
| 6396.658 | 7.422435 | -7068 | 7.48E-05 | 820  | 0.333333 | 0.013284 | UACA      |
| 343.9415 | 7.465819 | -7068 | 7.12E-05 | 183  | 0.25     | 0.002924 | SYTL5     |
| 12137.91 | 6.441873 | -7068 | 7.69E-05 | 1231 | 0.333333 | 0.019576 | FLRT2     |
| 1961.522 | 8.564787 | -7068 | 7.25E-05 | 401  | 0.333333 | 0.005765 | RCC1L     |
| 574.9582 | 9.695206 | -7068 | 7.13E-05 | 195  | 0.333333 | 0.002684 | VPS18     |
| 1484.149 | 7.491401 | -7068 | 7.21E-05 | 369  | 0.333333 | 0.004594 | SLC25A37  |
| 1238.982 | 11.36263 | -7068 | 7.17E-05 | 259  | 0.333333 | 0.003371 | PRR7      |
| 16305.43 | 25.59612 | -7068 | 7.31E-05 | 502  | 0.333333 | 0.007724 | INTS6L    |
| 3947.909 | 7.773459 | -7068 | 7.37E-05 | 624  | 0.333333 | 0.009915 | POMGNT2   |
| 653.7402 | 7.708762 | -7068 | 7.16E-05 | 251  | 0.333333 | 0.003711 | TOMM7     |
| 394.33   | 9.282045 | -7068 | 7.10E-05 | 167  | 0.25     | 0.002518 | CYGB      |
| 3692.694 | 8.79429  | -7068 | 7.31E-05 | 520  | 0.333333 | 0.007733 | VIT       |

|          |          |       |          |      |          |          |         |
|----------|----------|-------|----------|------|----------|----------|---------|
| 3749.259 | 9.587787 | -7068 | 7.31E-05 | 503  | 0.333333 | 0.007003 | SPHK1   |
| 726.2334 | 7.99359  | -7068 | 7.17E-05 | 261  | 0.333333 | 0.004041 | HMG5    |
| 2391.041 | 8.068802 | -7068 | 7.29E-05 | 470  | 0.333333 | 0.007064 | FOXRED1 |
| 1657.298 | 8.811418 | -7068 | 7.24E-05 | 367  | 0.333333 | 0.005538 | SLC26A1 |
| 1087.474 | 7.548673 | -7068 | 7.21E-05 | 326  | 0.333333 | 0.004794 | UBA7    |
| 4821.152 | 6.309948 | -7068 | 7.46E-05 | 799  | 0.333333 | 0.012857 | NR1D1   |
| 1696.427 | 8.512978 | -7068 | 7.23E-05 | 380  | 0.333333 | 0.005647 | SRXN1   |
| 2016.096 | 8.791419 | -7068 | 7.25E-05 | 395  | 0.333333 | 0.005653 | GKN1    |
| 4726.709 | 6.147635 | -7068 | 7.42E-05 | 770  | 0.333333 | 0.010883 | NCAPG   |
| 1006.28  | 5.716422 | -7068 | 7.11E-05 | 269  | 0.333333 | 0.002368 | ZNF430  |
| 1206.165 | 9.960467 | -7068 | 7.18E-05 | 270  | 0.333333 | 0.003337 | SIRT3   |
| 8182.968 | 7.204784 | -7068 | 7.55E-05 | 957  | 0.25     | 0.015784 | CYP26B1 |
| 5741.687 | 6.824597 | -7068 | 7.46E-05 | 807  | 0.333333 | 0.012019 | SKA1    |
| 3341.989 | 6.752851 | -7068 | 7.38E-05 | 640  | 0.333333 | 0.010329 | RPRD1B  |
| 1795.162 | 10.04413 | -7068 | 7.21E-05 | 327  | 0.333333 | 0.004141 | UQCC2   |
| 11530.39 | 7.969859 | -7068 | 7.61E-05 | 1029 | 0.333333 | 0.016515 | INTU    |
| 1345.638 | 6.909901 | -7068 | 7.24E-05 | 396  | 0.333333 | 0.006208 | MAGOHB  |
| 1191.031 | 7.689693 | -7068 | 7.19E-05 | 333  | 0.25     | 0.004634 | COLEC11 |
| 8493.304 | 7.761608 | -7068 | 7.54E-05 | 919  | 0.333333 | 0.01459  | FGGY    |
| 10529.13 | 7.194485 | -7068 | 7.61E-05 | 1063 | 0.333333 | 0.016933 | GPAM    |
| 2762.832 | 8.296037 | -7068 | 7.30E-05 | 489  | 0.333333 | 0.007885 | IL17D   |
| 1491.181 | 7.812911 | -7068 | 7.20E-05 | 341  | 0.333333 | 0.004382 | NLRC5   |
| 1627.465 | 8.803748 | -7068 | 7.23E-05 | 355  | 0.333333 | 0.004853 | DHDDS   |
| 2899.463 | 7.745405 | -7068 | 7.32E-05 | 532  | 0.333333 | 0.008087 | SUFU    |
| 3611.868 | 8.350064 | -7068 | 7.33E-05 | 550  | 0.333333 | 0.008848 | KLHL7   |
| 810.0434 | 6.572017 | -7068 | 7.17E-05 | 288  | 0.25     | 0.003887 | HBA2    |
| 3462.473 | 8.58673  | -7068 | 7.31E-05 | 520  | 0.333333 | 0.007179 | HINT2   |
| 1342.939 | 11.10933 | -7068 | 7.19E-05 | 286  | 0.333333 | 0.004224 | INTS4   |
| 663.6664 | 8.942495 | -7068 | 7.15E-05 | 217  | 0.333333 | 0.002782 | ETV7    |
| 2740.465 | 7.043307 | -7068 | 7.30E-05 | 514  | 0.333333 | 0.006756 | SLC15A3 |
| 8130.826 | 7.628197 | -7068 | 7.50E-05 | 887  | 0.333333 | 0.013414 | NFKBIZ  |
| 1760.051 | 6.958866 | -7068 | 7.24E-05 | 418  | 0.333333 | 0.005855 | RPF2    |
| 2168.177 | 8.543501 | -7068 | 7.25E-05 | 418  | 0.333333 | 0.005884 | DAPK3   |
| 953.7988 | 7.905281 | -7068 | 7.18E-05 | 291  | 0.333333 | 0.004271 | MED29   |
| 541.0233 | 10.32064 | -7068 | 7.12E-05 | 188  | 0.333333 | 0.002675 | RPAIN   |
| 5681.86  | 14.04419 | -7068 | 7.26E-05 | 409  | 0.333333 | 0.004576 | NXNL1   |
| 322.2611 | 9.762125 | -7068 | 7.10E-05 | 144  | 0.333333 | 0.002054 | WDR17   |
| 934.4806 | 10.18651 | -7068 | 7.16E-05 | 237  | 0.333333 | 0.003159 | NGB     |
| 4462.832 | 7.16666  | -7068 | 7.36E-05 | 671  | 0.333333 | 0.009303 | BCL3    |
| 3667.754 | 6.501289 | -7068 | 7.40E-05 | 685  | 0.333333 | 0.011373 | XPR1    |
| 1600.153 | 7.349691 | -7068 | 7.24E-05 | 401  | 0.333333 | 0.006053 | PITHD1  |

|          |          |       |          |      |          |          |          |
|----------|----------|-------|----------|------|----------|----------|----------|
| 1085.839 | 11.49182 | -7068 | 7.15E-05 | 222  | 0.25     | 0.002892 | MROH9    |
| 1638.531 | 7.808499 | -7068 | 7.23E-05 | 381  | 0.333333 | 0.005523 | NTMT1    |
| 747.3537 | 10.74713 | -7068 | 7.14E-05 | 204  | 0.333333 | 0.002835 | ZNHIT2   |
| 960.0116 | 8.317235 | -7068 | 7.17E-05 | 275  | 0.333333 | 0.003746 | CHPF2    |
| 1858.664 | 12.45935 | -7068 | 7.18E-05 | 280  | 0.333333 | 0.003636 | NUDT16L1 |
| 5074.691 | 7.29057  | -7068 | 7.42E-05 | 719  | 0.333333 | 0.011207 | SHPRH    |
| 10983.04 | 6.748789 | -7068 | 7.65E-05 | 1130 | 0.333333 | 0.018118 | PPIL4    |
| 735.5804 | 13.37491 | -7068 | 7.10E-05 | 158  | 0.333333 | 0.001976 | DMRT1    |
| 19121.92 | 6.995633 | -7068 | 7.85E-05 | 1467 | 0.333333 | 0.023344 | GPC6     |
| 891.824  | 9.512951 | -7068 | 7.15E-05 | 240  | 0.333333 | 0.003232 | USP36    |
| 6968.928 | 7.83976  | -7068 | 7.49E-05 | 825  | 0.333333 | 0.013458 | PNKD     |
| 1757.376 | 8.766425 | -7068 | 7.23E-05 | 376  | 0.333333 | 0.005572 | BMF      |
| 4815.111 | 6.822959 | -7068 | 7.43E-05 | 745  | 0.333333 | 0.011665 | PRRG4    |
| 3085.993 | 7.666299 | -7068 | 7.31E-05 | 528  | 0.333333 | 0.007508 | NOD2     |
| 3017.048 | 6.797387 | -7068 | 7.35E-05 | 600  | 0.333333 | 0.009681 | IFT43    |
| 1923.886 | 15.53934 | -7068 | 7.18E-05 | 242  | 0.333333 | 0.003147 | BCO1     |
| 3962.609 | 7.688085 | -7068 | 7.38E-05 | 631  | 0.333333 | 0.010164 | MTHFD2L  |
| 10348.5  | 8.399008 | -7068 | 7.47E-05 | 875  | 0.333333 | 0.012467 | ZNF700   |
| 1352.482 | 8.48305  | -7068 | 7.20E-05 | 337  | 0.333333 | 0.004589 | TTPAL    |
| 1264.437 | 6.547451 | -7068 | 7.20E-05 | 354  | 0.333333 | 0.003936 | CFHR5    |
| 634.8173 | 10.19824 | -7068 | 7.13E-05 | 201  | 0.333333 | 0.002865 | C1orf56  |
| 1248.297 | 9.411215 | -7068 | 7.16E-05 | 253  | 0.333333 | 0.002538 | RDH8     |
| 1532.941 | 7.176232 | -7068 | 7.25E-05 | 411  | 0.333333 | 0.006426 | TMEM70   |
| 8682.549 | 6.869554 | -7068 | 7.59E-05 | 1012 | 0.333333 | 0.016772 | SSH2     |
| 1776.287 | 8.80513  | -7068 | 7.22E-05 | 360  | 0.25     | 0.005199 | WHRN     |
| 1611.952 | 9.413228 | -7068 | 7.22E-05 | 336  | 0.333333 | 0.004995 | KCNE2    |
| 1335.943 | 8.630849 | -7068 | 7.20E-05 | 323  | 0.333333 | 0.004557 | PSMG3    |
| 6216.513 | 7.324433 | -7068 | 7.48E-05 | 821  | 0.333333 | 0.013131 | AGTRAP   |
| 5391.107 | 7.273396 | -7068 | 7.45E-05 | 759  | 0.333333 | 0.012181 | CNEP1R1  |
| 804.6129 | 8.448016 | -7068 | 7.16E-05 | 252  | 0.25     | 0.003472 | RBM48    |
| 1076.128 | 5.837414 | -7068 | 7.19E-05 | 348  | 0.333333 | 0.004351 | TIMM10   |
| 1507.499 | 8.956011 | -7068 | 7.21E-05 | 327  | 0.333333 | 0.004196 | EMC9     |
| 707.9477 | 7.802395 | -7068 | 7.15E-05 | 249  | 0.333333 | 0.003415 | VPS26B   |
| 793.9291 | 7.257401 | -7068 | 7.18E-05 | 279  | 0.333333 | 0.004304 | EXOC8    |
| 4732.731 | 6.983341 | -7068 | 7.41E-05 | 705  | 0.333333 | 0.010001 | C1QC     |
| 529.2212 | 11.43019 | -7068 | 7.04E-05 | 125  | 0.25     | 0.001222 | ADGB     |
| 1558.678 | 7.881138 | -7068 | 7.20E-05 | 352  | 0.333333 | 0.004188 | KRI1     |
| 1159.461 | 6.108496 | -7068 | 7.23E-05 | 393  | 0.333333 | 0.005574 | TPT1     |
| 2205.302 | 8.147665 | -7068 | 7.27E-05 | 430  | 0.333333 | 0.006267 | COA6     |
| 1453.389 | 9.821036 | -7068 | 7.21E-05 | 310  | 0.333333 | 0.004493 | SEC14L3  |
| 1776.956 | 7.438174 | -7068 | 7.28E-05 | 433  | 0.333333 | 0.007122 | SDK2     |

|          |          |       |          |      |          |          |          |
|----------|----------|-------|----------|------|----------|----------|----------|
| 4433.868 | 6.874945 | -7068 | 7.42E-05 | 725  | 0.333333 | 0.011657 | ANAPC1   |
| 2260.14  | 7.241906 | -7068 | 7.31E-05 | 503  | 0.333333 | 0.008106 | KMT5A    |
| 1472.031 | 10.65269 | -7068 | 7.16E-05 | 281  | 0.333333 | 0.003664 | MCEE     |
| 2082.169 | 9.879038 | -7068 | 7.23E-05 | 363  | 0.333333 | 0.00533  | UBE2D4   |
| 1722.536 | 9.697333 | -7068 | 7.23E-05 | 347  | 0.333333 | 0.004958 | CHAC1    |
| 3958.382 | 8.577124 | -7068 | 7.34E-05 | 570  | 0.333333 | 0.00833  | SLCO4A1  |
| 1370.175 | 10.04591 | -7068 | 7.18E-05 | 276  | 0.333333 | 0.003341 | RHBG     |
| 1233.827 | 9.626582 | -7068 | 7.17E-05 | 277  | 0.333333 | 0.00332  | MAVS     |
| 1865.22  | 7.493094 | -7068 | 7.26E-05 | 428  | 0.333333 | 0.006358 | RASIP1   |
| 4885.722 | 7.781391 | -7068 | 7.41E-05 | 690  | 0.333333 | 0.01113  | ADAMTSL1 |
| 3084.935 | 10.9939  | -7068 | 7.26E-05 | 404  | 0.333333 | 0.005328 | OSGIN1   |
| 921.3593 | 8.30733  | -7068 | 7.17E-05 | 277  | 0.333333 | 0.004088 | ZDHC9    |
| 4316.531 | 8.568362 | -7068 | 7.36E-05 | 596  | 0.333333 | 0.008813 | GALM     |
| 3661.273 | 7.132956 | -7068 | 7.36E-05 | 627  | 0.333333 | 0.010029 | SLF1     |
| 1033.583 | 5.316821 | -7068 | 7.21E-05 | 369  | 0.333333 | 0.004311 | ANGPTL3  |
| 1931.499 | 6.646225 | -7068 | 7.25E-05 | 444  | 0.333333 | 0.005778 | MRPL12   |
| 3004.133 | 7.150573 | -7068 | 7.36E-05 | 586  | 0.333333 | 0.010073 | GPR89B   |
| 2921.395 | 10.00165 | -7068 | 7.26E-05 | 424  | 0.333333 | 0.005927 | USF1     |
| 12177.87 | 7.01985  | -7068 | 7.69E-05 | 1179 | 0.333333 | 0.019459 | ZCCHC7   |
| 7168.143 | 12.02205 | -7068 | 7.28E-05 | 504  | 0.333333 | 0.006608 | MPC1     |
| 8279.868 | 6.969757 | -7068 | 7.58E-05 | 986  | 0.333333 | 0.016283 | SLC41A2  |
| 2497.283 | 10.17296 | -7068 | 7.25E-05 | 397  | 0.333333 | 0.005705 | SLC27A4  |
| 1793.318 | 8.718644 | -7068 | 7.23E-05 | 372  | 0.333333 | 0.005734 | RGS17    |
| 3056.055 | 8.071489 | -7068 | 7.31E-05 | 515  | 0.333333 | 0.007801 | SH3BGRL2 |
| 1743.296 | 9.717049 | -7068 | 7.21E-05 | 349  | 0.333333 | 0.005136 | SRD5A3   |
| 494.5543 | 8.849317 | -7068 | 7.12E-05 | 191  | 0.25     | 0.002781 | CPT1B    |
| 1945.12  | 9.979391 | -7068 | 7.21E-05 | 332  | 0.333333 | 0.004164 | FBXW5    |
| 2120.359 | 11.44743 | -7068 | 7.21E-05 | 307  | 0.333333 | 0.003717 | RNF39    |
| 3422.827 | 9.437235 | -7068 | 7.26E-05 | 446  | 0.333333 | 0.00618  | AK6      |
| 761.4795 | 7.769168 | -7068 | 7.18E-05 | 271  | 0.333333 | 0.004091 | BCL9L    |
| 529.3003 | 8.476667 | -7068 | 7.13E-05 | 202  | 0.333333 | 0.003061 | SLC2A14  |
| 2140.7   | 7.784025 | -7068 | 7.27E-05 | 451  | 0.333333 | 0.006822 | SEMA4C   |
| 853.2804 | 9.282307 | -7068 | 7.16E-05 | 240  | 0.333333 | 0.0031   | SLC25A23 |
| 1253.824 | 8.192867 | -7068 | 7.20E-05 | 328  | 0.25     | 0.004772 | TMSB15A  |
| 3564.42  | 6.821792 | -7068 | 7.39E-05 | 659  | 0.333333 | 0.01108  | HM13     |
| 2945.87  | 7.257273 | -7068 | 7.32E-05 | 552  | 0.333333 | 0.008245 | RPTOR    |
| 1145.053 | 12.55145 | -7068 | 7.13E-05 | 217  | 0.25     | 0.002603 | PAOX     |
| 2243.362 | 7.366313 | -7068 | 7.28E-05 | 468  | 0.333333 | 0.007139 | TAX1BP3  |
| 3822.385 | 7.17144  | -7068 | 7.38E-05 | 652  | 0.333333 | 0.010319 | LEPR     |
| 1049.23  | 8.223852 | -7068 | 7.19E-05 | 308  | 0.333333 | 0.004809 | TRPM7    |
| 11525.88 | 7.379055 | -7068 | 7.63E-05 | 1090 | 0.333333 | 0.01712  | KMT2E    |

|          |          |       |          |      |          |          |           |
|----------|----------|-------|----------|------|----------|----------|-----------|
| 1767.609 | 7.167074 | -7068 | 7.27E-05 | 439  | 0.333333 | 0.006831 | VPS29     |
| 3027.84  | 8.378183 | -7068 | 7.32E-05 | 513  | 0.333333 | 0.007665 | HS1BP3    |
| 2820.914 | 6.644488 | -7068 | 7.32E-05 | 567  | 0.333333 | 0.008228 | CASC5     |
| 3053.332 | 7.970141 | -7068 | 7.31E-05 | 527  | 0.333333 | 0.007955 | CD209     |
| 3875.364 | 7.893902 | -7068 | 7.36E-05 | 602  | 0.333333 | 0.00931  | RELT      |
| 760.0174 | 8.109306 | -7068 | 7.17E-05 | 259  | 0.333333 | 0.003979 | ANAPC16   |
| 6533.084 | 6.608322 | -7068 | 7.51E-05 | 894  | 0.333333 | 0.014151 | SBF2      |
| 2860.435 | 7.30859  | -7068 | 7.32E-05 | 548  | 0.333333 | 0.00874  | SERTAD4   |
| 3804.993 | 7.446303 | -7068 | 7.35E-05 | 617  | 0.333333 | 0.008822 | CDCA3     |
| 1330.526 | 5.478916 | -7068 | 7.24E-05 | 434  | 0.333333 | 0.00618  | CRISPLD2  |
| 2218.082 | 13.4327  | -7068 | 7.19E-05 | 282  | 0.333333 | 0.003437 | ZNF496    |
| 1275.752 | 12.93358 | -7068 | 7.15E-05 | 220  | 0.333333 | 0.002768 | ARMC5     |
| 3473.138 | 9.312793 | -7068 | 7.30E-05 | 497  | 0.333333 | 0.006874 | ZGPAT     |
| 765.4014 | 14.23063 | -7068 | 7.11E-05 | 161  | 0.25     | 0.001958 | NUDT7     |
| 15480.13 | 7.075455 | -7068 | 7.76E-05 | 1317 | 0.333333 | 0.021222 | RDH14     |
| 3501.398 | 7.338978 | -7068 | 7.37E-05 | 613  | 0.333333 | 0.009763 | NCOA7     |
| 1384.194 | 9.626456 | -7068 | 7.19E-05 | 292  | 0.333333 | 0.003837 | HRH3      |
| 1388.988 | 7.380533 | -7068 | 7.23E-05 | 377  | 0.333333 | 0.00584  | EXOC6     |
| 4927.128 | 7.114908 | -7068 | 7.45E-05 | 749  | 0.333333 | 0.012619 | SLC15A4   |
| 1192.913 | 6.864904 | -7068 | 7.12E-05 | 271  | 0.333333 | 0.002422 | ZNF791    |
| 1163.946 | 7.256048 | -7068 | 7.22E-05 | 357  | 0.333333 | 0.006042 | CNST      |
| 824.2198 | 7.120474 | -7068 | 7.20E-05 | 308  | 0.333333 | 0.005288 | NEIL2     |
| 1070.704 | 7.291124 | -7068 | 7.21E-05 | 334  | 0.333333 | 0.005494 | NSRP1     |
| 491.1406 | 8.574868 | -7068 | 7.13E-05 | 195  | 0.333333 | 0.003    | SGK3      |
| 2177.532 | 7.921257 | -7068 | 7.28E-05 | 456  | 0.333333 | 0.007241 | C18orf8   |
| 1339.769 | 7.618067 | -7068 | 7.24E-05 | 366  | 0.333333 | 0.005889 | TSEN15    |
| 2033.042 | 8.486738 | -7068 | 7.25E-05 | 407  | 0.333333 | 0.005813 | PLXNA1    |
| 1485.932 | 11.74657 | -7068 | 7.17E-05 | 268  | 0.333333 | 0.003897 | C7orf31   |
| 834.2886 | 9.362535 | -7068 | 7.16E-05 | 243  | 0.333333 | 0.003354 | AFTPH     |
| 7288.588 | 8.40181  | -7068 | 7.46E-05 | 776  | 0.333333 | 0.012329 | PGAM5     |
| 1669.685 | 9.681628 | -7068 | 7.21E-05 | 324  | 0.333333 | 0.004298 | TACO1     |
| 1529.329 | 8.661301 | -7068 | 7.23E-05 | 354  | 0.25     | 0.005533 | NXPE3     |
| 13671.79 | 7.829748 | -7068 | 7.67E-05 | 1144 | 0.25     | 0.018229 | FSTL5     |
| 4615.01  | 7.785759 | -7068 | 7.37E-05 | 624  | 0.333333 | 0.008627 | S100A14   |
| 11391.82 | 6.854003 | -7068 | 7.66E-05 | 1152 | 0.333333 | 0.018206 | MSI2      |
| 991.3938 | 7.225505 | -7068 | 7.20E-05 | 323  | 0.333333 | 0.004968 | ATL3      |
| 3635.635 | 7.915408 | -7068 | 7.35E-05 | 581  | 0.333333 | 0.009618 | MAMDC2    |
| 13761.65 | 7.440898 | -7068 | 7.67E-05 | 1178 | 0.333333 | 0.018474 | JAZF1     |
| 3550.95  | 7.94879  | -7068 | 7.33E-05 | 562  | 0.333333 | 0.008005 | S100A6    |
| 2718.329 | 7.570459 | -7068 | 7.30E-05 | 525  | 0.333333 | 0.007527 | SLC25A15  |
| 1681.811 | 8.42123  | -7068 | 7.23E-05 | 361  | 0.333333 | 0.00531  | NIPSNAP3A |

|          |          |       |          |      |          |          |          |
|----------|----------|-------|----------|------|----------|----------|----------|
| 4862.302 | 7.245916 | -7068 | 7.45E-05 | 739  | 0.333333 | 0.012444 | RHBDD1   |
| 1602.092 | 9.81129  | -7068 | 7.22E-05 | 322  | 0.333333 | 0.004225 | ADAMTSL4 |
| 543.0526 | 9.420046 | -7068 | 7.13E-05 | 191  | 0.333333 | 0.002557 | TMED4    |
| 4096.678 | 7.307955 | -7068 | 7.39E-05 | 665  | 0.333333 | 0.010247 | ATP6V1F  |
| 3256.853 | 9.535799 | -7068 | 7.28E-05 | 458  | 0.333333 | 0.006153 | DUOX2    |
| 2118.387 | 8.871933 | -7068 | 7.23E-05 | 402  | 0.25     | 0.005298 | C15orf48 |
| 4016.288 | 7.759008 | -7068 | 7.36E-05 | 618  | 0.333333 | 0.009416 | OSBPL5   |
| 1853.841 | 6.63928  | -7068 | 7.25E-05 | 463  | 0.25     | 0.006007 | VTN      |
| 1310.736 | 6.718705 | -7068 | 7.21E-05 | 368  | 0.333333 | 0.004627 | APOC4    |
| 1386.214 | 6.875955 | -7068 | 7.23E-05 | 382  | 0.333333 | 0.005399 | RBM4     |
| 1991.767 | 7.616786 | -7068 | 7.26E-05 | 421  | 0.333333 | 0.006032 | TLR8     |
| 1178.071 | 8.026473 | -7068 | 7.19E-05 | 305  | 0.333333 | 0.003551 | TTC38    |
| 3034.381 | 7.894279 | -7068 | 7.32E-05 | 536  | 0.333333 | 0.008186 | IFT80    |
| 1337.035 | 11.06674 | -7068 | 7.18E-05 | 259  | 0.333333 | 0.003028 | RNF208   |
| 1186.327 | 5.790728 | -7068 | 7.23E-05 | 392  | 0.333333 | 0.005264 | HLA-DRB5 |
| 8459.288 | 7.234774 | -7068 | 7.55E-05 | 951  | 0.333333 | 0.015288 | JAML     |
| 1649.094 | 9.952749 | -7068 | 7.19E-05 | 315  | 0.333333 | 0.004132 | MIF4GD   |
| 2475.684 | 12.56438 | -7068 | 7.21E-05 | 325  | 0.333333 | 0.004456 | TGM7     |
| 679.9135 | 7.168486 | -7068 | 7.16E-05 | 267  | 0.333333 | 0.004124 | NUCKS1   |
| 3609.374 | 10.205   | -7068 | 7.22E-05 | 419  | 0.333333 | 0.004773 | ZNF552   |
| 2101.685 | 9.813285 | -7068 | 7.23E-05 | 363  | 0.25     | 0.00491  | KLF15    |
| 1865.113 | 7.912635 | -7068 | 7.27E-05 | 427  | 0.333333 | 0.006988 | IRF2BP2  |
| 4802.729 | 8.440097 | -7068 | 7.38E-05 | 637  | 0.333333 | 0.010034 | GNPDA2   |
| 948.0629 | 7.41484  | -7068 | 7.19E-05 | 301  | 0.333333 | 0.004085 | NABP2    |
| 1418.316 | 3.893886 | -7068 | 7.26E-05 | 540  | 0.333333 | 0.006418 | RPL4     |
| 720.3765 | 9.894938 | -7068 | 7.15E-05 | 218  | 0.333333 | 0.00293  | CD200R1  |
| 13191.96 | 7.323995 | -7068 | 7.69E-05 | 1182 | 0.333333 | 0.019138 | ARHGAP20 |
| 2733.191 | 14.05025 | -7068 | 7.19E-05 | 300  | 0.333333 | 0.003326 | TMEM79   |
| 429.0966 | 11.46959 | -7068 | 7.08E-05 | 131  | 0.333333 | 0.001803 | KLHL29   |
| 2214.168 | 9.591142 | -7068 | 7.24E-05 | 387  | 0.333333 | 0.005707 | TMEM263  |
| 1284.393 | 8.583906 | -7068 | 7.22E-05 | 339  | 0.333333 | 0.005315 | EDARADD  |
| 3264.585 | 8.107291 | -7068 | 7.32E-05 | 541  | 0.333333 | 0.007979 | NRM      |
| 3283.318 | 6.773673 | -7068 | 7.34E-05 | 611  | 0.333333 | 0.008946 | ECHDC3   |
| 1484.568 | 9.907009 | -7068 | 7.20E-05 | 309  | 0.333333 | 0.004214 | TRIM41   |
| 3016.704 | 8.506211 | -7068 | 7.31E-05 | 516  | 0.333333 | 0.00835  | H3F3B    |
| 3385.623 | 7.956869 | -7068 | 7.35E-05 | 566  | 0.333333 | 0.009062 | PPP1R14C |
| 2705.732 | 8.853176 | -7068 | 7.28E-05 | 457  | 0.333333 | 0.007014 | AJUBA    |
| 1938.61  | 12.16767 | -7068 | 7.19E-05 | 295  | 0.25     | 0.00438  | SPZ1     |
| 4963.839 | 10.94338 | -7068 | 7.33E-05 | 533  | 0.333333 | 0.008378 | UBE2U    |
| 3854.54  | 7.507745 | -7068 | 7.38E-05 | 626  | 0.333333 | 0.010039 | TMEM167A |
| 1633.639 | 9.883607 | -7068 | 7.21E-05 | 315  | 0.333333 | 0.004369 | CASP14   |



|          |          |       |          |     |          |          |          |
|----------|----------|-------|----------|-----|----------|----------|----------|
| 3340.601 | 7.700329 | -7068 | 7.33E-05 | 562 | 0.333333 | 0.0085   | CD274    |
| 1568.97  | 8.132833 | -7068 | 7.23E-05 | 370 | 0.333333 | 0.00531  | CERS2    |
| 547.5305 | 9.225589 | -7068 | 7.11E-05 | 189 | 0.333333 | 0.002282 | UCK1     |
| 2827.672 | 7.902804 | -7068 | 7.31E-05 | 511 | 0.333333 | 0.007918 | GPAT4    |
| 698.6109 | 12.94817 | -7068 | 7.11E-05 | 169 | 0.333333 | 0.002565 | BBS5     |
| 1862.231 | 13.29333 | -7068 | 7.17E-05 | 238 | 0.333333 | 0.003245 | IFT172   |
| 975.7682 | 8.374044 | -7068 | 7.19E-05 | 292 | 0.333333 | 0.004472 | ZCCHC17  |
| 1241.599 | 7.542715 | -7068 | 7.19E-05 | 324 | 0.333333 | 0.004325 | PDCD2L   |
| 4525.598 | 7.63118  | -7068 | 7.41E-05 | 679 | 0.333333 | 0.011138 | RNF185   |
| 1555.174 | 7.869431 | -7068 | 7.23E-05 | 370 | 0.333333 | 0.005411 | WNT3A    |
| 3217.858 | 7.546983 | -7068 | 7.33E-05 | 552 | 0.333333 | 0.008206 | FZD10    |
| 1694.398 | 6.635532 | -7068 | 7.19E-05 | 351 | 0.333333 | 0.003965 | ZNF493   |
| 2098.283 | 7.456429 | -7068 | 7.29E-05 | 463 | 0.333333 | 0.007358 | FAM76B   |
| 1335.245 | 8.234683 | -7068 | 7.20E-05 | 320 | 0.25     | 0.00436  | SCIN     |
| 2942.99  | 8.517064 | -7068 | 7.30E-05 | 497 | 0.333333 | 0.007826 | OMA1     |
| 2168.067 | 4.520761 | -7068 | 7.29E-05 | 600 | 0.333333 | 0.007186 | SF3B6    |
| 4000.189 | 7.183575 | -7068 | 7.39E-05 | 664 | 0.333333 | 0.010953 | FRMD6    |
| 365.9516 | 9.00189  | -7068 | 7.12E-05 | 166 | 0.333333 | 0.002486 | LOXL4    |
| 1624.451 | 10.13465 | -7068 | 7.19E-05 | 319 | 0.333333 | 0.004646 | BTBD6    |
| 3320.049 | 10.50143 | -7068 | 7.27E-05 | 443 | 0.333333 | 0.006295 | EGLN2    |
| 1399.768 | 9.815349 | -7068 | 7.19E-05 | 294 | 0.333333 | 0.003593 | THEM6    |
| 283.9848 | 3.62145  | -7068 | 7.10E-05 | 249 | 0.333333 | 0.002809 | RPS26    |
| 1162.821 | 4.985795 | -7068 | 7.21E-05 | 396 | 0.333333 | 0.00491  | TIMM8B   |
| 2596.408 | 7.910847 | -7068 | 7.30E-05 | 494 | 0.333333 | 0.007393 | PHF6     |
| 211.1904 | 6.805157 | -7068 | 7.05E-05 | 141 | 0.333333 | 0.001882 | COL6A6   |
| 7765.569 | 8.124347 | -7068 | 7.48E-05 | 828 | 0.333333 | 0.012802 | LRRK2    |
| 5955.688 | 7.206409 | -7068 | 7.46E-05 | 800 | 0.333333 | 0.012889 | ZNRF2    |
| 3139.707 | 7.749505 | -7068 | 7.33E-05 | 548 | 0.333333 | 0.008657 | DZANK1   |
| 1539.702 | 6.102255 | -7068 | 7.26E-05 | 444 | 0.25     | 0.00673  | COL8A2   |
| 1198.574 | 13.55119 | -7068 | 7.15E-05 | 212 | 0.333333 | 0.002792 | SIRT4    |
| 1713.795 | 7.971426 | -7068 | 7.22E-05 | 369 | 0.333333 | 0.004774 | ARHGAP9  |
| 2863.03  | 7.172606 | -7068 | 7.31E-05 | 539 | 0.333333 | 0.007842 | C1orf112 |
| 1778.605 | 9.220665 | -7068 | 7.21E-05 | 347 | 0.25     | 0.004894 | SLC19A3  |
| 3522.801 | 6.849469 | -7068 | 7.37E-05 | 636 | 0.333333 | 0.010068 | MATN2    |
| 1089.372 | 7.279064 | -7068 | 7.21E-05 | 342 | 0.333333 | 0.005396 | MMGT1    |
| 1950.492 | 8.872483 | -7068 | 7.24E-05 | 385 | 0.333333 | 0.005823 | IMMP1L   |
| 3139.081 | 8.428038 | -7068 | 7.32E-05 | 514 | 0.333333 | 0.007786 | TNFSF15  |
| 4756.473 | 14.89425 | -7068 | 7.23E-05 | 365 | 0.333333 | 0.004561 | ZSCAN1   |
| 891.0182 | 8.268941 | -7068 | 7.18E-05 | 278 | 0.333333 | 0.004404 | KCTD14   |
| 3569.552 | 7.922274 | -7068 | 7.34E-05 | 575 | 0.333333 | 0.008673 | CSNK1A1L |
| 797.3052 | 4.29663  | -7068 | 7.20E-05 | 386 | 0.333333 | 0.005454 | PHF5A    |

|          |          |       |          |      |          |          |          |
|----------|----------|-------|----------|------|----------|----------|----------|
| 1521.31  | 9.437317 | -7068 | 7.18E-05 | 314  | 0.333333 | 0.004332 | GMPPB    |
| 2470.489 | 10.31872 | -7068 | 7.24E-05 | 389  | 0.333333 | 0.005229 | CRELD2   |
| 978.5857 | 8.077171 | -7068 | 7.17E-05 | 282  | 0.333333 | 0.003785 | DUS2     |
| 2436.408 | 7.983418 | -7068 | 7.28E-05 | 461  | 0.333333 | 0.006561 | SLC6A14  |
| 2741.079 | 6.831082 | -7068 | 7.30E-05 | 540  | 0.333333 | 0.007384 | RAD18    |
| 671.4556 | 12.65757 | -7068 | 7.11E-05 | 154  | 0.333333 | 0.001893 | LDHAL6B  |
| 2445.066 | 7.323527 | -7068 | 7.31E-05 | 515  | 0.333333 | 0.008535 | RAPH1    |
| 2315.985 | 9.215453 | -7068 | 7.25E-05 | 406  | 0.333333 | 0.005756 | SEMA4B   |
| 2311.42  | 8.262375 | -7068 | 7.28E-05 | 446  | 0.333333 | 0.006981 | PHLDB2   |
| 12207.03 | 7.503892 | -7068 | 7.62E-05 | 1093 | 0.333333 | 0.016896 | TSHZ3    |
| 1225.351 | 8.783173 | -7068 | 7.19E-05 | 302  | 0.333333 | 0.004115 | NMRAL1   |
| 964.41   | 8.735508 | -7068 | 7.18E-05 | 275  | 0.333333 | 0.0039   | TMEM209  |
| 1693.66  | 8.666697 | -7068 | 7.23E-05 | 367  | 0.333333 | 0.005172 | NT5DC2   |
| 4153.25  | 6.13377  | -7068 | 7.39E-05 | 717  | 0.333333 | 0.010242 | KIF15    |
| 3223.675 | 7.630112 | -7068 | 7.34E-05 | 566  | 0.333333 | 0.008704 | SUSD1    |
| 766.5951 | 8.490789 | -7068 | 7.16E-05 | 252  | 0.333333 | 0.00397  | MACC1    |
| 2454.172 | 8.25     | -7068 | 7.27E-05 | 447  | 0.333333 | 0.006482 | GRHL3    |
| 1461.772 | 7.141568 | -7068 | 7.25E-05 | 409  | 0.25     | 0.006738 | C15orf57 |
| 1785.927 | 8.643307 | -7068 | 7.23E-05 | 372  | 0.25     | 0.005166 | PHF11    |
| 1142.213 | 9.657084 | -7068 | 7.18E-05 | 279  | 0.333333 | 0.00396  | APLN     |
| 2113.975 | 9.91646  | -7068 | 7.24E-05 | 362  | 0.333333 | 0.004786 | REEP6    |
| 1470.249 | 6.225187 | -7068 | 7.24E-05 | 418  | 0.333333 | 0.005844 | DSCC1    |
| 4871.057 | 6.837999 | -7068 | 7.45E-05 | 760  | 0.333333 | 0.012579 | DDIT4L   |
| 3076.921 | 8.196471 | -7068 | 7.32E-05 | 523  | 0.333333 | 0.008098 | AIF1L    |
| 1090.677 | 6.422463 | -7068 | 7.22E-05 | 370  | 0.333333 | 0.00583  | GINS3    |
| 1357.848 | 9.968924 | -7068 | 7.17E-05 | 279  | 0.25     | 0.003723 | NEIL1    |
| 11837.69 | 10.33129 | -7068 | 7.50E-05 | 835  | 0.333333 | 0.011973 | FBLN7    |
| 4188.516 | 7.281978 | -7068 | 7.40E-05 | 673  | 0.333333 | 0.010919 | CREB3L4  |
| 761.1859 | 7.633251 | -7068 | 7.18E-05 | 278  | 0.333333 | 0.0044   | ITLN1    |
| 4663.628 | 8.966574 | -7068 | 7.35E-05 | 593  | 0.333333 | 0.008851 | AGR3     |
| 1501.062 | 8.532765 | -7068 | 7.21E-05 | 352  | 0.333333 | 0.005146 | FOXA3    |
| 2073.266 | 9.039981 | -7068 | 7.24E-05 | 387  | 0.333333 | 0.005614 | CIB3     |
| 1486.241 | 7.45487  | -7068 | 7.23E-05 | 378  | 0.333333 | 0.005629 | MITD1    |
| 1093.766 | 10.16351 | -7068 | 7.17E-05 | 250  | 0.333333 | 0.003128 | IL17RC   |
| 696.8247 | 11.21105 | -7068 | 7.14E-05 | 190  | 0.333333 | 0.002634 | PLD4     |
| 287.9806 | 8.901862 | -7068 | 7.09E-05 | 153  | 0.25     | 0.002261 | ZFAND2A  |
| 7176.053 | 7.432183 | -7068 | 7.51E-05 | 870  | 0.333333 | 0.014191 | ALG14    |
| 9016.181 | 7.067185 | -7068 | 7.59E-05 | 1006 | 0.333333 | 0.016309 | RAB3C    |
| 5118.26  | 11.09981 | -7068 | 7.34E-05 | 550  | 0.333333 | 0.009173 | TMCO5A   |
| 2752.347 | 10.87665 | -7068 | 7.24E-05 | 384  | 0.333333 | 0.00591  | ACTRT2   |
| 2325.591 | 7.220059 | -7068 | 7.32E-05 | 508  | 0.333333 | 0.008266 | FCHO2    |

|          |          |       |          |      |          |          |          |
|----------|----------|-------|----------|------|----------|----------|----------|
| 3093.244 | 11.36736 | -7068 | 7.26E-05 | 401  | 0.25     | 0.005985 | OPN4     |
| 9322.137 | 7.056855 | -7068 | 7.56E-05 | 1008 | 0.333333 | 0.015183 | ANLN     |
| 5493.542 | 8.71176  | -7068 | 7.39E-05 | 659  | 0.333333 | 0.010093 | MTPN     |
| 2443.885 | 8.021509 | -7068 | 7.29E-05 | 471  | 0.333333 | 0.007362 | KIAA1524 |
| 11591.79 | 7.994739 | -7068 | 7.56E-05 | 1014 | 0.333333 | 0.014832 | PARPBP   |
| 880.8094 | 11.44777 | -7068 | 7.12E-05 | 190  | 0.333333 | 0.002022 | KIR2DS4  |
| 4019.271 | 7.070348 | -7068 | 7.39E-05 | 671  | 0.333333 | 0.010646 | HELLS    |
| 3268.439 | 7.441025 | -7068 | 7.33E-05 | 572  | 0.333333 | 0.008151 | CES1     |
| 3044.426 | 8.329294 | -7068 | 7.31E-05 | 517  | 0.333333 | 0.007848 | RNF135   |
| 1112.086 | 7.662791 | -7068 | 7.20E-05 | 319  | 0.333333 | 0.004781 | PIM3     |
| 2541.5   | 7.858907 | -7068 | 7.29E-05 | 487  | 0.25     | 0.007681 | SMIM3    |
| 2392.007 | 6.275877 | -7068 | 7.31E-05 | 540  | 0.333333 | 0.007856 | CLEC7A   |
| 424.908  | 10.90771 | -7068 | 7.07E-05 | 140  | 0.333333 | 0.001549 | CRYGB    |
| 162.1513 | 8.473014 | -7068 | 7.06E-05 | 114  | 0.333333 | 0.001552 | BBC3     |
| 1596.128 | 10.35137 | -7068 | 7.19E-05 | 299  | 0.333333 | 0.003733 | RPUSD1   |
| 4741.455 | 7.152146 | -7068 | 7.44E-05 | 731  | 0.333333 | 0.012141 | NUDCD2   |
| 477.4222 | 10.24871 | -7068 | 7.11E-05 | 166  | 0.333333 | 0.001983 | WNT7B    |
| 1078.613 | 8.685363 | -7068 | 7.20E-05 | 300  | 0.333333 | 0.004388 | PITPNC1  |
| 1803.02  | 10.60183 | -7068 | 7.20E-05 | 309  | 0.333333 | 0.003976 | CLEC3A   |
| 3538.24  | 7.220946 | -7068 | 7.35E-05 | 609  | 0.333333 | 0.009156 | CDH23    |
| 3687.912 | 6.941915 | -7068 | 7.38E-05 | 653  | 0.333333 | 0.010659 | ARFGF3   |
| 2430.922 | 10.43849 | -7068 | 7.22E-05 | 360  | 0.25     | 0.005142 | CHST6    |
| 5840.804 | 6.545613 | -7068 | 7.50E-05 | 866  | 0.25     | 0.014568 | GAS2L3   |
| 612.5814 | 8.269201 | -7068 | 7.16E-05 | 234  | 0.333333 | 0.003717 | ALKBH2   |
| 414.6743 | 5.068247 | -7068 | 7.13E-05 | 249  | 0.333333 | 0.003725 | UHRF1    |
| 8211.113 | 6.929306 | -7068 | 7.56E-05 | 978  | 0.333333 | 0.015866 | E2F7     |
| 434.6273 | 11.82257 | -7068 | 7.05E-05 | 123  | 0.25     | 0.001311 | CFAP45   |
| 1722.885 | 10.90865 | -7068 | 7.19E-05 | 295  | 0.333333 | 0.004369 | LRRTM4   |
| 332.3522 | 7.600661 | -7068 | 7.12E-05 | 183  | 0.333333 | 0.00288  | RP9      |
| 7052.029 | 8.218145 | -7068 | 7.48E-05 | 801  | 0.333333 | 0.01276  | PDCD7    |
| 9651.915 | 7.24719  | -7068 | 7.61E-05 | 1032 | 0.333333 | 0.017238 | PPM1L    |
| 5026.901 | 7.44147  | -7068 | 7.42E-05 | 724  | 0.333333 | 0.011477 | RBM33    |
| 907.1563 | 9.389915 | -7068 | 7.16E-05 | 248  | 0.333333 | 0.003125 | UNC93B1  |
| 4284.128 | 7.113015 | -7068 | 7.40E-05 | 686  | 0.25     | 0.011363 | FMN2     |
| 482.993  | 10.59968 | -7068 | 7.09E-05 | 167  | 0.333333 | 0.002269 | FAM111B  |
| 5102.634 | 6.336822 | -7068 | 7.46E-05 | 811  | 0.333333 | 0.01246  | MCM10    |
| 4626.196 | 13.76866 | -7068 | 7.24E-05 | 374  | 0.333333 | 0.004259 | TBATA    |
| 1632.518 | 7.55095  | -7068 | 7.24E-05 | 394  | 0.333333 | 0.005655 | DLL4     |
| 1552.887 | 8.991082 | -7068 | 7.21E-05 | 346  | 0.333333 | 0.005397 | TTLL3    |
| 966.4453 | 10.58026 | -7068 | 7.16E-05 | 238  | 0.333333 | 0.003351 | TIGD7    |
| 1377.31  | 7.661385 | -7068 | 7.12E-05 | 269  | 0.333333 | 0.002123 | ZNF234   |

|          |          |       |          |      |          |          |         |
|----------|----------|-------|----------|------|----------|----------|---------|
| 9371.354 | 7.181993 | -7068 | 7.60E-05 | 1016 | 0.333333 | 0.016779 | C9orf72 |
| 750.3719 | 7.61026  | -7068 | 7.16E-05 | 267  | 0.333333 | 0.003886 | DBNL    |
| 1241.338 | 4.124975 | -7068 | 7.24E-05 | 483  | 0.333333 | 0.005928 | NOP56   |
| 1997.091 | 6.032718 | -7068 | 7.19E-05 | 429  | 0.333333 | 0.004342 | NDUFB9  |
| 1508.86  | 8.849301 | -7068 | 7.21E-05 | 337  | 0.333333 | 0.004937 | NKD2    |
| 2184.816 | 7.287024 | -7068 | 7.29E-05 | 483  | 0.333333 | 0.007204 | ATP5SL  |
| 663.3907 | 10.79586 | -7068 | 7.15E-05 | 203  | 0.333333 | 0.002923 | MRI1    |
| 1183.8   | 11.07864 | -7068 | 7.15E-05 | 227  | 0.333333 | 0.00262  | CELA1   |
| 1147.705 | 12.29272 | -7068 | 7.15E-05 | 223  | 0.25     | 0.003447 | LRRC34  |
| 1717.343 | 11.29997 | -7068 | 7.19E-05 | 295  | 0.333333 | 0.004325 | ACTRT3  |
| 4879.697 | 10.24249 | -7068 | 7.33E-05 | 536  | 0.333333 | 0.008453 | FBXO15  |
| 10714.35 | 7.089194 | -7068 | 7.65E-05 | 1093 | 0.333333 | 0.01809  | CPNE8   |
| 1276.908 | 8.898255 | -7068 | 7.20E-05 | 313  | 0.25     | 0.004673 | B3GNT5  |
| 861.9379 | 9.192859 | -7068 | 7.16E-05 | 251  | 0.333333 | 0.003641 | SNX22   |
| 442.6566 | 11.89651 | -7068 | 7.09E-05 | 138  | 0.333333 | 0.001694 | TCP10L  |
| 1354.283 | 8.678433 | -7068 | 7.20E-05 | 322  | 0.333333 | 0.004533 | STBD1   |
| 3970.294 | 7.664405 | -7068 | 7.39E-05 | 638  | 0.333333 | 0.010518 | ALKBH3  |
| 4637.284 | 7.768423 | -7068 | 7.41E-05 | 674  | 0.333333 | 0.011019 | CLRN1   |
| 3630.384 | 7.05479  | -7068 | 7.38E-05 | 644  | 0.333333 | 0.010658 | FBXO32  |
| 4639.121 | 7.71454  | -7068 | 7.40E-05 | 670  | 0.333333 | 0.01021  | ITGA11  |
| 7274.969 | 7.220418 | -7068 | 7.51E-05 | 877  | 0.333333 | 0.013996 | TMCC3   |
| 10886.74 | 7.73897  | -7068 | 7.61E-05 | 1027 | 0.333333 | 0.016368 | AGBL4   |
| 6436.732 | 8.517977 | -7068 | 7.44E-05 | 741  | 0.333333 | 0.011672 | RBM24   |
| 1875.043 | 10.14291 | -7068 | 7.21E-05 | 337  | 0.25     | 0.004761 | ZBTB4   |
| 405.7011 | 7.875817 | -7068 | 7.11E-05 | 186  | 0.333333 | 0.0025   | CCDC88B |
| 935.5122 | 10.82098 | -7068 | 7.15E-05 | 218  | 0.25     | 0.003026 | KLHDC7B |
| 1323.096 | 7.828477 | -7068 | 7.18E-05 | 307  | 0.333333 | 0.004066 | RASAL3  |
| 786.3036 | 11.15638 | -7068 | 7.09E-05 | 173  | 0.333333 | 0.001703 | KIR2DL2 |
| 615.9573 | 9.183586 | -7068 | 7.12E-05 | 195  | 0.333333 | 0.002704 | GOPC    |
| 2532.877 | 8.813742 | -7068 | 7.28E-05 | 445  | 0.333333 | 0.006965 | LCA5    |
| 1329.271 | 8.965297 | -7068 | 7.20E-05 | 318  | 0.333333 | 0.004622 | DGCR6   |
| 1147.749 | 9.005482 | -7068 | 7.17E-05 | 276  | 0.25     | 0.003578 | SEMA3G  |
| 1571.839 | 11.12033 | -7068 | 7.17E-05 | 273  | 0.333333 | 0.003616 | RBP7    |
| 6294.767 | 7.39007  | -7068 | 7.49E-05 | 818  | 0.333333 | 0.013323 | ST3GAL3 |
| 2839.526 | 8.041857 | -7068 | 7.29E-05 | 485  | 0.333333 | 0.007551 | TC2N    |
| 705.389  | 6.949059 | -7068 | 7.15E-05 | 262  | 0.333333 | 0.00364  | HAVCR2  |
| 4756.478 | 8.1521   | -7068 | 7.38E-05 | 648  | 0.333333 | 0.010324 | MFSD4A  |
| 1706.352 | 6.521802 | -7068 | 7.25E-05 | 434  | 0.333333 | 0.00576  | ALYREF  |
| 4618.375 | 12.58943 | -7068 | 7.24E-05 | 391  | 0.333333 | 0.004517 | OPTC    |
| 893.858  | 7.73705  | -7068 | 7.19E-05 | 297  | 0.333333 | 0.004721 | DENND2C |
| 3301.523 | 7.282363 | -7068 | 7.35E-05 | 586  | 0.333333 | 0.009573 | FGF10   |

|          |          |       |          |      |          |          |         |
|----------|----------|-------|----------|------|----------|----------|---------|
| 32.00165 | 4.690494 | -7068 | 6.86E-05 | 75   | 0.25     | 0.001249 | SMN2    |
| 1401.497 | 4.944796 | -7068 | 7.27E-05 | 492  | 0.333333 | 0.007102 | TCP1    |
| 4380.707 | 7.689733 | -7068 | 7.40E-05 | 656  | 0.333333 | 0.010918 | RNF144B |
| 1843.013 | 7.732566 | -7068 | 7.24E-05 | 404  | 0.333333 | 0.005413 | GNGT2   |
| 7464.297 | 6.937326 | -7068 | 7.55E-05 | 937  | 0.333333 | 0.015464 | PDCL3   |
| 7516.687 | 7.066675 | -7068 | 7.53E-05 | 911  | 0.333333 | 0.014675 | NT5DC1  |
| 1586.659 | 8.067482 | -7068 | 7.24E-05 | 390  | 0.333333 | 0.00623  | PELO    |
| 1386.974 | 9.278951 | -7068 | 7.18E-05 | 299  | 0.333333 | 0.003724 | FGF21   |
| 8090.23  | 7.91651  | -7068 | 7.53E-05 | 885  | 0.333333 | 0.014836 | AGBL1   |
| 1297.743 | 8.143368 | -7068 | 7.22E-05 | 340  | 0.333333 | 0.004897 | APOL2   |
| 1990.285 | 10.47584 | -7068 | 7.22E-05 | 337  | 0.333333 | 0.004933 | PELI3   |
| 3120.648 | 8.044723 | -7068 | 7.33E-05 | 539  | 0.333333 | 0.008484 | SES2    |
| 2673.121 | 6.984829 | -7068 | 7.30E-05 | 535  | 0.333333 | 0.008145 | ACAD11  |
| 1514.332 | 7.109592 | -7068 | 7.24E-05 | 406  | 0.333333 | 0.00592  | SGO1    |
| 1162.959 | 7.986205 | -7068 | 7.20E-05 | 318  | 0.333333 | 0.004794 | MYO1G   |
| 1049.799 | 11.30382 | -7068 | 7.14E-05 | 216  | 0.333333 | 0.002451 | SPSB3   |
| 1021.265 | 7.207831 | -7068 | 7.22E-05 | 336  | 0.333333 | 0.005466 | LRP12   |
| 2304.112 | 8.363945 | -7068 | 7.27E-05 | 439  | 0.333333 | 0.006561 | CIDEA   |
| 1275.09  | 9.182431 | -7068 | 7.20E-05 | 302  | 0.333333 | 0.004248 | LZTS2   |
| 2875.17  | 7.320822 | -7068 | 7.33E-05 | 554  | 0.333333 | 0.00895  | NOM1    |
| 800.3195 | 8.36366  | -7068 | 7.17E-05 | 261  | 0.333333 | 0.003917 | RNF170  |
| 5099.577 | 7.001052 | -7068 | 7.47E-05 | 772  | 0.333333 | 0.013083 | RFFL    |
| 1552.548 | 9.373408 | -7068 | 7.19E-05 | 310  | 0.333333 | 0.003934 | COA3    |
| 5595.306 | 8.945265 | -7068 | 7.33E-05 | 596  | 0.333333 | 0.008286 | ZNF709  |
| 1912.711 | 8.186191 | -7068 | 7.16E-05 | 308  | 0.333333 | 0.002781 | ZNF443  |
| 1113.775 | 9.176783 | -7068 | 7.17E-05 | 274  | 0.333333 | 0.00369  | YPEL3   |
| 6046.012 | 6.996344 | -7068 | 7.47E-05 | 825  | 0.333333 | 0.012633 | CDCA7   |
| 6836.073 | 9.763166 | -7068 | 7.40E-05 | 672  | 0.333333 | 0.009844 | RXFP2   |
| 400.0284 | 8.920428 | -7068 | 7.12E-05 | 180  | 0.333333 | 0.002633 | NELFA   |
| 1238.276 | 11.58576 | -7068 | 7.14E-05 | 234  | 0.333333 | 0.003058 | ZMYND19 |
| 147.5307 | 5.581085 | -7068 | 7.05E-05 | 139  | 0.333333 | 0.002111 | TMED7   |
| 3030.961 | 7.843619 | -7068 | 7.32E-05 | 535  | 0.333333 | 0.008684 | NADK2   |
| 10385.02 | 7.205889 | -7068 | 7.62E-05 | 1065 | 0.333333 | 0.017624 | PLEKHA7 |
| 420.8985 | 8.143884 | -7068 | 7.14E-05 | 194  | 0.25     | 0.003115 | CIART   |
| 1934.288 | 9.563867 | -7068 | 7.22E-05 | 354  | 0.333333 | 0.004903 | SEMA5B  |
| 1186.498 | 9.18518  | -7068 | 7.17E-05 | 286  | 0.333333 | 0.003571 | PIDD1   |
| 1724.435 | 12.67576 | -7068 | 7.17E-05 | 284  | 0.333333 | 0.003998 | OPN3    |
| 2591.499 | 9.203221 | -7068 | 7.28E-05 | 437  | 0.333333 | 0.006874 | CRYGN   |
| 597.5994 | 6.671151 | -7068 | 7.14E-05 | 246  | 0.333333 | 0.00362  | CTHRC1  |
| 5977.799 | 7.197794 | -7068 | 7.47E-05 | 804  | 0.333333 | 0.012916 | TMEM154 |
| 345.7515 | 9.156812 | -7068 | 7.11E-05 | 161  | 0.333333 | 0.002407 | C7orf25 |

|          |          |       |          |      |          |          |          |
|----------|----------|-------|----------|------|----------|----------|----------|
| 458.6843 | 6.943935 | -7068 | 7.14E-05 | 226  | 0.25     | 0.003802 | THAP6    |
| 5898.128 | 7.96662  | -7068 | 7.44E-05 | 724  | 0.333333 | 0.011703 | TTC8     |
| 822.7993 | 8.203257 | -7068 | 7.16E-05 | 253  | 0.333333 | 0.003499 | ADCY4    |
| 410.2877 | 8.186504 | -7068 | 7.09E-05 | 174  | 0.333333 | 0.002666 | ANKIB1   |
| 7733.128 | 8.45368  | -7068 | 7.45E-05 | 797  | 0.333333 | 0.012033 | SGO2     |
| 1048.452 | 10.58817 | -7068 | 7.16E-05 | 239  | 0.333333 | 0.003495 | ZFHx4    |
| 237.7396 | 8.31417  | -7068 | 7.10E-05 | 143  | 0.333333 | 0.002287 | MGAT5B   |
| 3963.903 | 8.845185 | -7068 | 7.33E-05 | 556  | 0.333333 | 0.008729 | HES6     |
| 4171.047 | 7.653772 | -7068 | 7.38E-05 | 640  | 0.333333 | 0.010112 | SLC4A11  |
| 10589.35 | 6.792858 | -7068 | 7.62E-05 | 1117 | 0.333333 | 0.017808 | MYO18A   |
| 584.0195 | 8.300417 | -7068 | 7.11E-05 | 202  | 0.333333 | 0.002393 | TNxB     |
| 1261.055 | 7.964389 | -7068 | 7.19E-05 | 316  | 0.333333 | 0.004147 | ABCC6    |
| 1726.502 | 8.601083 | -7068 | 7.23E-05 | 376  | 0.333333 | 0.005682 | MTFP1    |
| 2339.575 | 9.122135 | -7068 | 7.26E-05 | 418  | 0.25     | 0.006212 | SUSD3    |
| 1801.9   | 6.402866 | -7068 | 7.26E-05 | 464  | 0.333333 | 0.006651 | SERTAD1  |
| 11.9084  | 2.791106 | -7068 | 6.73E-05 | 60   | 0.333333 | 8.97E-04 | PPIAL4A  |
| 17485.48 | 17.90282 | -7068 | 7.34E-05 | 561  | 0.333333 | 0.009093 | UQCRH    |
| 2817.156 | 6.140311 | -7068 | 7.34E-05 | 607  | 0.333333 | 0.008911 | FANCD2   |
| 1872.291 | 8.096243 | -7068 | 7.26E-05 | 416  | 0.333333 | 0.00644  | DGCR8    |
| 3503.791 | 6.934848 | -7068 | 7.38E-05 | 636  | 0.333333 | 0.010336 | GLB1     |
| 8969.335 | 6.874674 | -7068 | 7.60E-05 | 1023 | 0.333333 | 0.017156 | TMTC2    |
| 5455.082 | 7.904082 | -7068 | 7.43E-05 | 722  | 0.333333 | 0.01119  | DEPDC1B  |
| 3133.708 | 10.99026 | -7068 | 7.24E-05 | 391  | 0.333333 | 0.004698 | IRAK2    |
| 662.1632 | 5.468468 | -7068 | 7.08E-05 | 216  | 0.333333 | 0.001631 | ZNF138   |
| 2294.38  | 8.776935 | -7068 | 7.18E-05 | 348  | 0.333333 | 0.003573 | ZNF649   |
| 2095.314 | 8.16678  | -7068 | 7.27E-05 | 429  | 0.333333 | 0.006611 | CKAP2L   |
| 862.4829 | 5.213437 | -7068 | 7.20E-05 | 361  | 0.333333 | 0.0049   | DDX39B   |
| 2807.708 | 6.282867 | -7068 | 7.33E-05 | 581  | 0.333333 | 0.008388 | KIF20A   |
| 3340.461 | 8.217968 | -7068 | 7.33E-05 | 544  | 0.333333 | 0.00833  | HFE2     |
| 1644.219 | 8.648608 | -7068 | 7.23E-05 | 359  | 0.333333 | 0.005299 | PCDH15   |
| 745.0331 | 8.023467 | -7068 | 7.16E-05 | 260  | 0.333333 | 0.003941 | NMNAT1   |
| 2120.778 | 7.764103 | -7068 | 7.26E-05 | 442  | 0.333333 | 0.006667 | CENPL    |
| 588.2952 | 7.157921 | -7068 | 7.14E-05 | 232  | 0.25     | 0.003437 | HBA1     |
| 2559.026 | 7.760623 | -7068 | 7.32E-05 | 504  | 0.333333 | 0.008498 | GRID1    |
| 9712.026 | 7.29402  | -7068 | 7.60E-05 | 1018 | 0.333333 | 0.016448 | DSCAML1  |
| 1968.687 | 7.297772 | -7068 | 7.28E-05 | 448  | 0.333333 | 0.007081 | EID2     |
| 199.7318 | 7.697072 | -7068 | 7.08E-05 | 132  | 0.333333 | 0.002024 | UBE2QL1  |
| 75.19834 | 12.34973 | -7068 | 6.82E-05 | 49   | 0.25     | 5.12E-04 | RGS9BP   |
| 1124.294 | 8.629552 | -7068 | 7.17E-05 | 276  | 0.333333 | 0.003447 | TRIM63   |
| 447.8529 | 8.377149 | -7068 | 7.07E-05 | 168  | 0.333333 | 0.001831 | UQCC3    |
| 80.54984 | 6.770958 | -7068 | 6.90E-05 | 85   | 0.25     | 0.001013 | C22orf39 |

|          |          |       |          |     |          |          |         |
|----------|----------|-------|----------|-----|----------|----------|---------|
| 2198.852 | 7.83313  | -7068 | 7.28E-05 | 456 | 0.333333 | 0.007283 | NDUFAF2 |
| 1032.239 | 8.781267 | -7068 | 7.17E-05 | 263 | 0.333333 | 0.003405 | GUCA1C  |
| 443.8398 | 12.22908 | -7068 | 7.09E-05 | 141 | 0.333333 | 0.002033 | DYNC2H1 |
| 100.6008 | 4.952058 | -7068 | 7.07E-05 | 103 | 0.333333 | 0.001339 | ZNF740  |
| 1127.864 | 11.64478 | -7068 | 7.14E-05 | 205 | 0.333333 | 0.002645 | HES7    |
| 4469.352 | 8.328716 | -7068 | 7.38E-05 | 631 | 0.333333 | 0.009843 | TMEM60  |
| 403.9176 | 11.36254 | -7068 | 7.08E-05 | 131 | 0.333333 | 0.001489 | RGSL1   |
| 1502.815 | 8.062857 | -7068 | 7.22E-05 | 360 | 0.333333 | 0.005482 | UBE2E2  |
| 102.3549 | 8.896455 | -7068 | 7.00E-05 | 84  | 0.25     | 0.001262 | TMEM237 |
| 68.36997 | 10.4161  | -7068 | 6.98E-05 | 65  | 0.25     | 9.44E-04 | FAM117B |
| 1818.612 | 11.02412 | -7068 | 7.20E-05 | 310 | 0.25     | 0.004174 | UNC119B |
| 1499.033 | 10.38015 | -7068 | 7.18E-05 | 288 | 0.333333 | 0.003447 | DLK2    |
| 15371.48 | 69.98879 | -7068 | 7.16E-05 | 245 | 0.333333 | 0.002956 | SPDYE2  |
| 1258.627 | 9.177349 | -7068 | 7.19E-05 | 306 | 0.333333 | 0.004497 | ADHFE1  |
| 4053.455 | 6.590276 | -7068 | 7.42E-05 | 713 | 0.333333 | 0.012023 | YPEL2   |
| 601.3609 | 7.621786 | -7068 | 7.16E-05 | 242 | 0.333333 | 0.003874 | TMTC3   |
| 1066.144 | 7.99764  | -7068 | 7.20E-05 | 317 | 0.333333 | 0.005105 | SARNP   |
| 1634.245 | 7.284085 | -7068 | 7.25E-05 | 418 | 0.333333 | 0.006712 | PYROXD2 |
| 811.8412 | 12.09765 | -7068 | 7.13E-05 | 179 | 0.333333 | 0.002146 | RAX2    |
| 5757.866 | 7.783506 | -7068 | 7.43E-05 | 742 | 0.333333 | 0.011732 | ZNF831  |
| 728.2296 | 8.890427 | -7068 | 7.14E-05 | 221 | 0.333333 | 0.002795 | RHBDD2  |
| 657.7617 | 7.482323 | -7068 | 7.15E-05 | 243 | 0.333333 | 0.003234 | APOL6   |
| 595.5097 | 11.08883 | -7068 | 7.11E-05 | 169 | 0.333333 | 0.002098 | COX4I2  |
| 2764.81  | 11.07114 | -7068 | 7.24E-05 | 382 | 0.333333 | 0.005042 | USHBP1  |
| 9133.281 | 7.949985 | -7068 | 7.54E-05 | 923 | 0.333333 | 0.014602 | KCNH8   |
| 946.5322 | 7.877571 | -7068 | 7.19E-05 | 293 | 0.25     | 0.004534 | MSANTD4 |
| 824.8753 | 8.617514 | -7068 | 7.17E-05 | 259 | 0.333333 | 0.003834 | SIRT5   |
| 2778.435 | 7.037666 | -7068 | 7.33E-05 | 556 | 0.333333 | 0.008756 | KNSTRN  |
| 754.9754 | 7.7049   | -7068 | 7.15E-05 | 262 | 0.333333 | 0.003815 | MASTL   |
| 1439.432 | 4.880818 | -7068 | 7.26E-05 | 471 | 0.333333 | 0.00649  | ERCC6L  |
| 2128.654 | 7.536666 | -7068 | 7.29E-05 | 472 | 0.25     | 0.007526 | PCBD2   |
| 1365.084 | 8.720885 | -7068 | 7.22E-05 | 335 | 0.333333 | 0.00528  | TTC9C   |
| 2682.412 | 8.589942 | -7068 | 7.21E-05 | 383 | 0.333333 | 0.004222 | ZNF558  |
| 456.3921 | 8.813654 | -7068 | 7.10E-05 | 183 | 0.25     | 0.002783 | GLCCI1  |
| 981.2244 | 7.557911 | -7068 | 7.15E-05 | 275 | 0.333333 | 0.003116 | MIOX    |
| 2816.843 | 13.62998 | -7068 | 7.22E-05 | 339 | 0.333333 | 0.005132 | ULBP3   |
| 2663.603 | 7.060364 | -7068 | 7.32E-05 | 546 | 0.333333 | 0.008459 | RHNO1   |
| 1843.833 | 8.875394 | -7068 | 7.23E-05 | 373 | 0.333333 | 0.00578  | ZSWIM6  |
| 2407.045 | 8.681107 | -7068 | 7.24E-05 | 398 | 0.25     | 0.005184 | PDZK1   |
| 448.9266 | 11.53587 | -7068 | 7.03E-05 | 123 | 0.25     | 0.001298 | C9orf24 |
| 507.5262 | 11.26964 | -7068 | 7.09E-05 | 156 | 0.333333 | 0.002205 | C5orf51 |

|          |          |       |          |      |          |          |          |
|----------|----------|-------|----------|------|----------|----------|----------|
| 941.5217 | 7.466839 | -7068 | 7.18E-05 | 310  | 0.333333 | 0.004474 | DCLRE1B  |
| 771.1207 | 9.582512 | -7068 | 7.16E-05 | 234  | 0.333333 | 0.003593 | EMB      |
| 2073.125 | 8.170499 | -7068 | 7.23E-05 | 396  | 0.25     | 0.005086 | MAL2     |
| 1348.145 | 7.623828 | -7068 | 7.20E-05 | 340  | 0.333333 | 0.004129 | SPC24    |
| 367.686  | 8.420171 | -7068 | 7.10E-05 | 167  | 0.333333 | 0.002213 | GHRL     |
| 1788.499 | 7.370207 | -7068 | 7.25E-05 | 419  | 0.333333 | 0.006012 | BOP1     |
| 437.332  | 7.348474 | -7068 | 7.12E-05 | 196  | 0.333333 | 0.002656 | CRTC2    |
| 1125.082 | 8.745495 | -7068 | 7.19E-05 | 299  | 0.333333 | 0.00453  | SSBP4    |
| 1168.256 | 11.31937 | -7068 | 7.16E-05 | 247  | 0.333333 | 0.003293 | USP18    |
| 2589.726 | 7.024625 | -7068 | 7.32E-05 | 537  | 0.333333 | 0.008612 | LNK2     |
| 13745.08 | 6.896313 | -7068 | 7.75E-05 | 1273 | 0.333333 | 0.021417 | KCTD1    |
| 10536.9  | 6.881318 | -7068 | 7.66E-05 | 1118 | 0.333333 | 0.018702 | MAML2    |
| 1450.294 | 6.773518 | -7068 | 7.23E-05 | 390  | 0.333333 | 0.005487 | RAB34    |
| 1826.836 | 8.725648 | -7068 | 7.24E-05 | 368  | 0.333333 | 0.005304 | SDR16C5  |
| 1608.498 | 11.61736 | -7068 | 7.16E-05 | 253  | 0.333333 | 0.002766 | P2RX2    |
| 882.4322 | 8.837153 | -7068 | 7.18E-05 | 267  | 0.333333 | 0.004071 | ACSS1    |
| 154.8521 | 19.88988 | -7068 | 6.67E-05 | 43   | 0.25     | 3.54E-04 | SYCE3    |
| 1809.675 | 10.67203 | -7068 | 7.20E-05 | 317  | 0.333333 | 0.004643 | TSSK6    |
| 2228.755 | 8.40582  | -7068 | 7.26E-05 | 433  | 0.333333 | 0.006324 | NES      |
| 1701.726 | 7.477509 | -7068 | 7.25E-05 | 409  | 0.333333 | 0.00643  | C1orf131 |
| 1944.059 | 8.591886 | -7068 | 7.25E-05 | 399  | 0.333333 | 0.006217 | MRPS6    |
| 650.4419 | 7.991742 | -7068 | 7.16E-05 | 245  | 0.333333 | 0.003875 | SFR1     |
| 3245.766 | 9.140224 | -7068 | 7.31E-05 | 500  | 0.333333 | 0.008155 | MIPOL1   |
| 175.6805 | 9.08263  | -7068 | 7.01E-05 | 104  | 0.25     | 0.001338 | HSBP1L1  |
| 1183.095 | 8.544374 | -7068 | 7.20E-05 | 313  | 0.333333 | 0.004408 | MAP3K6   |
| 892.6693 | 9.486212 | -7068 | 7.16E-05 | 250  | 0.333333 | 0.003513 | PIGU     |
| 2223.826 | 8.213745 | -7068 | 7.27E-05 | 441  | 0.333333 | 0.00704  | SAMD11   |
| 4627.392 | 7.982471 | -7068 | 7.39E-05 | 651  | 0.333333 | 0.010587 | USP31    |
| 2035.996 | 10.11333 | -7068 | 7.21E-05 | 343  | 0.333333 | 0.004633 | TPRG1L   |
| 1231.628 | 7.888916 | -7068 | 7.22E-05 | 345  | 0.25     | 0.005563 | TP53INP1 |
| 897.6411 | 16.28177 | -7068 | 7.10E-05 | 147  | 0.333333 | 0.001472 | CHAT     |
| 13690.88 | 7.320004 | -7068 | 7.72E-05 | 1217 | 0.333333 | 0.020274 | KLRG2    |
| 1430.65  | 5.001636 | -7068 | 7.24E-05 | 437  | 0.333333 | 0.004983 | ADH4     |
| 20999.85 | 8.057114 | -7068 | 7.83E-05 | 1411 | 0.333333 | 0.022825 | CNTN4    |
| 1520.04  | 9.401623 | -7068 | 7.22E-05 | 333  | 0.333333 | 0.005083 | MYOCD    |
| 1783.217 | 8.135459 | -7068 | 7.24E-05 | 390  | 0.333333 | 0.005415 | DUS3L    |
| 2679.466 | 8.208128 | -7068 | 7.31E-05 | 496  | 0.333333 | 0.007829 | DIS3L    |
| 9076.711 | 7.270576 | -7068 | 7.58E-05 | 982  | 0.333333 | 0.015855 | SESN3    |
| 3238.004 | 6.649775 | -7068 | 7.37E-05 | 628  | 0.333333 | 0.010484 | LRIG3    |
| 9638.817 | 7.126905 | -7068 | 7.60E-05 | 1033 | 0.333333 | 0.016813 | PRICKLE1 |
| 2714.533 | 7.572135 | -7068 | 7.31E-05 | 513  | 0.333333 | 0.007919 | SFRP2    |



|          |          |       |          |     |          |          |          |
|----------|----------|-------|----------|-----|----------|----------|----------|
| 5613.133 | 9.129082 | -7068 | 7.41E-05 | 657 | 0.333333 | 0.010501 | TMEM252  |
| 2734.571 | 7.202971 | -7068 | 7.33E-05 | 550 | 0.333333 | 0.009162 | GRPEL2   |
| 710.7261 | 9.742969 | -7068 | 7.13E-05 | 197 | 0.333333 | 0.002271 | SCAF1    |
| 2542.618 | 9.648472 | -7068 | 7.26E-05 | 425 | 0.333333 | 0.006534 | CDK15    |
| 399.5951 | 7.720285 | -7068 | 7.11E-05 | 192 | 0.333333 | 0.00288  | MRPL10   |
| 571.2945 | 8.211591 | -7068 | 7.16E-05 | 226 | 0.333333 | 0.003642 | ING5     |
| 1206.7   | 8.635922 | -7068 | 7.20E-05 | 314 | 0.333333 | 0.004738 | RNF26    |
| 3020.874 | 11.4175  | -7068 | 7.24E-05 | 374 | 0.333333 | 0.005002 | NMRK2    |
| 747.2589 | 6.549326 | -7068 | 7.19E-05 | 306 | 0.333333 | 0.004879 | GLIPR2   |
| 8598.658 | 7.079564 | -7068 | 7.58E-05 | 976 | 0.333333 | 0.016108 | HHIP     |
| 1434.442 | 10.051   | -7068 | 7.19E-05 | 293 | 0.333333 | 0.004171 | ZNF341   |
| 1980.633 | 11.47492 | -7068 | 7.18E-05 | 281 | 0.333333 | 0.003268 | SLC22A12 |
| 2022.064 | 8.064596 | -7068 | 7.26E-05 | 422 | 0.333333 | 0.006618 | ZNF462   |
| 2194.531 | 8.114151 | -7068 | 7.28E-05 | 450 | 0.333333 | 0.006962 | ACOT9    |
| 1747.043 | 7.903016 | -7068 | 7.24E-05 | 407 | 0.333333 | 0.006225 | PINX1    |
| 1033.205 | 9.20546  | -7068 | 7.19E-05 | 274 | 0.333333 | 0.004156 | FKBP7    |
| 955.0069 | 11.22933 | -7068 | 7.14E-05 | 203 | 0.333333 | 0.002803 | HES5     |
| 5483.652 | 6.909494 | -7068 | 7.47E-05 | 795 | 0.333333 | 0.01325  | NAV1     |
| 1658.082 | 7.184077 | -7068 | 7.26E-05 | 418 | 0.25     | 0.006765 | CCDC80   |
| 1546.456 | 10.36334 | -7068 | 7.19E-05 | 293 | 0.333333 | 0.003607 | ZNF503   |
| 732.4514 | 78.2501  | -7068 | 5.82E-05 | 20  | 0.25     | 1.25E-04 | SPDYE3   |
| 1569.431 | 15.55113 | -7068 | 7.15E-05 | 201 | 0.333333 | 0.002556 | NXF5     |
| 362.3504 | 10.37539 | -7068 | 7.09E-05 | 142 | 0.333333 | 0.002015 | ABCC11   |
| 1280.477 | 12.0191  | -7068 | 7.16E-05 | 242 | 0.25     | 0.0035   | TSPAN16  |
| 1510.985 | 6.668448 | -7068 | 7.25E-05 | 418 | 0.25     | 0.006594 | MEDAG    |
| 1199.361 | 9.157624 | -7068 | 7.19E-05 | 292 | 0.333333 | 0.004379 | TCEAL7   |
| 4470.296 | 6.643876 | -7068 | 7.43E-05 | 747 | 0.333333 | 0.012284 | PIK3AP1  |
| 1359.543 | 7.240228 | -7068 | 7.24E-05 | 389 | 0.333333 | 0.006528 | GPR155   |
| 8916.421 | 9.823237 | -7068 | 7.44E-05 | 761 | 0.333333 | 0.011043 | SUCNR1   |
| 4040.84  | 8.52463  | -7068 | 7.35E-05 | 581 | 0.333333 | 0.009502 | NUDT12   |
| 1111.291 | 7.397439 | -7068 | 7.21E-05 | 333 | 0.333333 | 0.005456 | SLC38A9  |
| 831.4838 | 6.364733 | -7068 | 7.19E-05 | 317 | 0.333333 | 0.004802 | SPON2    |
| 1546.449 | 9.516048 | -7068 | 7.21E-05 | 318 | 0.333333 | 0.00452  | DCD      |
| 6199.062 | 8.203326 | -7068 | 7.45E-05 | 743 | 0.333333 | 0.011795 | CPO      |
| 928.8418 | 5.589661 | -7068 | 7.19E-05 | 341 | 0.333333 | 0.004193 | KRT17    |
| 382.3862 | 7.954937 | -7068 | 7.10E-05 | 180 | 0.25     | 0.002563 | DEFA3    |
| 6616.377 | 8.227298 | -7068 | 7.45E-05 | 758 | 0.333333 | 0.012133 | GKN2     |
| 3776.703 | 7.145275 | -7068 | 7.40E-05 | 660 | 0.333333 | 0.011484 | ABCA10   |
| 464.8628 | 6.761733 | -7068 | 7.14E-05 | 226 | 0.333333 | 0.003472 | ARL13B   |
| 811.2582 | 8.960728 | -7068 | 7.15E-05 | 239 | 0.25     | 0.003421 | MICU3    |
| 2403.385 | 8.570422 | -7068 | 7.20E-05 | 373 | 0.333333 | 0.004487 | ZNF624   |

|          |          |       |          |     |          |          |          |
|----------|----------|-------|----------|-----|----------|----------|----------|
| 2394.192 | 8.914225 | -7068 | 7.27E-05 | 427 | 0.333333 | 0.006321 | RPS19BP1 |
| 1205.08  | 12.26256 | -7068 | 7.16E-05 | 226 | 0.333333 | 0.003153 | PGLYRP3  |
| 3596.577 | 7.850992 | -7068 | 7.34E-05 | 578 | 0.333333 | 0.00892  | ACMSD    |
| 2102.475 | 7.991766 | -7068 | 7.27E-05 | 445 | 0.333333 | 0.007046 | BGLAP    |
| 1055.239 | 9.72101  | -7068 | 7.16E-05 | 257 | 0.333333 | 0.003198 | PYGO2    |
| 600.8101 | 9.503555 | -7068 | 7.13E-05 | 203 | 0.25     | 0.003053 | MRAP2    |
| 829.0723 | 7.872561 | -7068 | 7.16E-05 | 270 | 0.333333 | 0.003987 | MPLKIP   |
| 3392.084 | 11.97512 | -7068 | 7.25E-05 | 386 | 0.333333 | 0.005252 | SP7      |
| 6286.362 | 7.47976  | -7068 | 7.48E-05 | 808 | 0.333333 | 0.013032 | TMEM161B |
| 2001.122 | 8.836194 | -7068 | 7.26E-05 | 404 | 0.333333 | 0.006677 | MMD2     |
| 1798.573 | 9.677928 | -7068 | 7.23E-05 | 341 | 0.333333 | 0.005455 | LYPD6    |
| 1203.12  | 8.922562 | -7068 | 7.19E-05 | 292 | 0.333333 | 0.003936 | CCDC12   |
| 1843.702 | 11.19575 | -7068 | 7.20E-05 | 313 | 0.25     | 0.004761 | PHOSPHO1 |
| 145.722  | 5.867514 | -7068 | 6.91E-05 | 88  | 0.333333 | 5.98E-04 | ZNF714   |
| 3596.607 | 7.268444 | -7068 | 7.38E-05 | 622 | 0.333333 | 0.010161 | COX18    |
| 271.4843 | 8.246977 | -7068 | 7.07E-05 | 142 | 0.333333 | 0.001658 | MYH4     |
| 9239.918 | 7.419794 | -7068 | 7.59E-05 | 988 | 0.333333 | 0.01633  | RASEF    |
| 3154.042 | 8.784489 | -7068 | 7.23E-05 | 438 | 0.333333 | 0.005507 | ZNF382   |
| 44.58652 | 8.080314 | -7068 | 6.95E-05 | 60  | 0.333333 | 7.55E-04 | FAM20C   |
| 2566.34  | 7.733977 | -7068 | 7.31E-05 | 501 | 0.333333 | 0.007972 | CD109    |
| 1085.339 | 9.925665 | -7068 | 7.17E-05 | 262 | 0.333333 | 0.00409  | FAM83A   |
| 2188.737 | 7.093856 | -7068 | 7.30E-05 | 495 | 0.333333 | 0.008268 | GDF6     |
| 122.0284 | 10.47669 | -7068 | 6.99E-05 | 80  | 0.25     | 0.001078 | PLPP4    |
| 4145.756 | 7.38637  | -7068 | 7.39E-05 | 658 | 0.333333 | 0.010465 | SULF2    |
| 2946.957 | 7.183449 | -7068 | 7.35E-05 | 575 | 0.333333 | 0.009453 | FIGNL1   |
| 1192.753 | 11.29095 | -7068 | 7.15E-05 | 230 | 0.333333 | 0.002913 | HOXC9    |
| 2798.372 | 8.073307 | -7068 | 7.31E-05 | 506 | 0.333333 | 0.008087 | HOXA9    |
| 8170.792 | 7.538532 | -7068 | 7.53E-05 | 915 | 0.333333 | 0.014519 | SEC16B   |
| 662.7344 | 9.625114 | -7068 | 7.14E-05 | 211 | 0.333333 | 0.003024 | AMDHD2   |
| 1278.43  | 10.43972 | -7068 | 7.17E-05 | 256 | 0.333333 | 0.002942 | SEMA4G   |
| 3285.295 | 8.00455  | -7068 | 7.32E-05 | 528 | 0.333333 | 0.007494 | S100A16  |
| 1416.087 | 8.592836 | -7068 | 7.20E-05 | 329 | 0.333333 | 0.004748 | TMEM125  |
| 3512.317 | 7.664026 | -7068 | 7.35E-05 | 584 | 0.333333 | 0.009008 | KCNE3    |
| 536.293  | 6.046996 | -7068 | 7.12E-05 | 233 | 0.333333 | 0.002537 | SLC22A7  |
| 2135.335 | 8.673402 | -7068 | 7.26E-05 | 416 | 0.333333 | 0.006884 | ZCCHC12  |
| 172.541  | 10.80613 | -7068 | 7.06E-05 | 95  | 0.333333 | 0.001366 | ARHGAP23 |
| 1635.727 | 10.97827 | -7068 | 7.19E-05 | 288 | 0.333333 | 0.003961 | NPM2     |
| 6947.884 | 7.294285 | -7068 | 7.51E-05 | 865 | 0.333333 | 0.014341 | FAT3     |
| 7379.414 | 8.376036 | -7068 | 7.42E-05 | 720 | 0.333333 | 0.011758 | SLFN5    |
| 985.0125 | 9.139775 | -7068 | 7.18E-05 | 275 | 0.333333 | 0.00424  | PIWIL4   |
| 9161.86  | 7.605804 | -7068 | 7.58E-05 | 961 | 0.333333 | 0.015839 | MPP7     |

|          |          |       |          |      |          |          |          |
|----------|----------|-------|----------|------|----------|----------|----------|
| 181.9308 | 14.62139 | -7068 | 7.00E-05 | 74   | 0.333333 | 8.10E-04 | LURAP1   |
| 101.2871 | 5.702999 | -7068 | 7.05E-05 | 111  | 0.333333 | 0.001674 | TCEAL6   |
| 4095.01  | 8.0227   | -7068 | 7.36E-05 | 609  | 0.333333 | 0.009475 | NMNAT3   |
| 1249.958 | 6.830498 | -7068 | 7.22E-05 | 358  | 0.333333 | 0.004959 | CYP8B1   |
| 1547.85  | 8.652889 | -7068 | 7.23E-05 | 349  | 0.333333 | 0.005475 | PHOSPHO2 |
| 818.8926 | 7.428881 | -7068 | 7.18E-05 | 289  | 0.25     | 0.004722 | C2orf69  |
| 3024.489 | 8.752933 | -7068 | 7.30E-05 | 496  | 0.333333 | 0.007585 | COMTD1   |
| 513.668  | 7.784845 | -7068 | 7.12E-05 | 210  | 0.333333 | 0.003331 | MESDC2   |
| 1758.657 | 8.215432 | -7068 | 7.24E-05 | 379  | 0.333333 | 0.006024 | CENPW    |
| 1044.674 | 9.286489 | -7068 | 7.16E-05 | 268  | 0.333333 | 0.003551 | BCL2L12  |
| 4796.341 | 7.839551 | -7068 | 7.39E-05 | 668  | 0.333333 | 0.010459 | NIM1K    |
| 1025.369 | 11.25183 | -7068 | 7.14E-05 | 211  | 0.333333 | 0.002672 | CERCAM   |
| 3558.619 | 6.688555 | -7068 | 7.39E-05 | 659  | 0.333333 | 0.010682 | JDP2     |
| 1693.919 | 7.204717 | -7068 | 7.24E-05 | 409  | 0.333333 | 0.005553 | C4B      |
| 2602.494 | 12.46724 | -7068 | 7.22E-05 | 328  | 0.333333 | 0.004538 | GRIN3B   |
| 6008.709 | 7.240875 | -7068 | 7.48E-05 | 815  | 0.333333 | 0.013326 | CIT      |
| 231.2008 | 8.640865 | -7068 | 7.07E-05 | 135  | 0.333333 | 0.002086 | TRNP1    |
| 1559.532 | 8.015556 | -7068 | 7.23E-05 | 370  | 0.333333 | 0.005501 | RTN4IP1  |
| 1159.667 | 8.390706 | -7068 | 7.20E-05 | 313  | 0.333333 | 0.004643 | BSCL2    |
| 953.8348 | 10.45674 | -7068 | 7.13E-05 | 216  | 0.333333 | 0.002278 | TP53I13  |
| 1089.385 | 13.87535 | -7068 | 7.13E-05 | 193  | 0.333333 | 0.002469 | MAFA     |
| 390.0755 | 12.36516 | -7068 | 7.04E-05 | 114  | 0.333333 | 0.001127 | KISS1R   |
| 1628.873 | 9.065829 | -7068 | 7.21E-05 | 330  | 0.333333 | 0.004769 | CAPSL    |
| 5767.245 | 7.187471 | -7068 | 7.47E-05 | 800  | 0.333333 | 0.013285 | COL22A1  |
| 381.0552 | 8.215039 | -7068 | 7.10E-05 | 174  | 0.25     | 0.002248 | BCO2     |
| 5830.58  | 7.156791 | -7068 | 7.45E-05 | 798  | 0.333333 | 0.012736 | COL23A1  |
| 728.8178 | 8.578558 | -7068 | 7.18E-05 | 256  | 0.333333 | 0.004297 | STON2    |
| 1342.639 | 9.047751 | -7068 | 7.18E-05 | 299  | 0.25     | 0.00388  | GSTA1    |
| 137.0159 | 9.363436 | -7068 | 7.03E-05 | 95   | 0.25     | 0.00125  | RBFOX3   |
| 17379.33 | 7.386871 | -7068 | 7.80E-05 | 1350 | 0.333333 | 0.022    | NEGR1    |
| 409.8961 | 9.043555 | -7068 | 7.12E-05 | 172  | 0.333333 | 0.002471 | U2AF1L4  |
| 2888.906 | 12.78906 | -7068 | 7.22E-05 | 334  | 0.333333 | 0.003941 | RAB4B    |
| 3636.906 | 8.211316 | -7068 | 7.34E-05 | 564  | 0.333333 | 0.009067 | STAC2    |
| 861.042  | 5.518403 | -7068 | 7.19E-05 | 339  | 0.333333 | 0.004618 | NELFE    |
| 746.2327 | 10.46403 | -7068 | 7.13E-05 | 203  | 0.25     | 0.002757 | COX7B2   |
| 2403.055 | 8.088406 | -7068 | 7.28E-05 | 462  | 0.25     | 0.007401 | NXPE2    |
| 215.1817 | 9.411558 | -7068 | 7.04E-05 | 115  | 0.333333 | 0.001509 | ABCA13   |
| 2360.696 | 8.979115 | -7068 | 7.27E-05 | 425  | 0.333333 | 0.006644 | C20orf85 |
| 4078.169 | 8.265439 | -7068 | 7.37E-05 | 599  | 0.333333 | 0.00997  | BHLHE22  |
| 257.3969 | 21.94583 | -7068 | 6.92E-05 | 54   | 0.25     | 7.22E-04 | FAM47E   |
| 13251.77 | 7.300238 | -7068 | 7.69E-05 | 1189 | 0.333333 | 0.019456 | ZNF385B  |

|          |          |       |          |     |          |          |           |
|----------|----------|-------|----------|-----|----------|----------|-----------|
| 786.5189 | 7.583938 | -7068 | 7.19E-05 | 282 | 0.333333 | 0.004693 | GBA       |
| 609.7125 | 8.71307  | -7068 | 7.14E-05 | 215 | 0.333333 | 0.002975 | ELOVL1    |
| 4944.122 | 7.56647  | -7068 | 7.42E-05 | 710 | 0.333333 | 0.011698 | CLYBL     |
| 412.8953 | 6.102809 | -7068 | 7.15E-05 | 237 | 0.333333 | 0.003877 | HNRNPA1L2 |
| 3207.132 | 8.41806  | -7068 | 7.24E-05 | 435 | 0.333333 | 0.005012 | ZNF567    |
| 1290.329 | 8.256479 | -7068 | 7.21E-05 | 339 | 0.333333 | 0.005214 | SFXN2     |
| 5113.428 | 8.287206 | -7068 | 7.40E-05 | 677 | 0.333333 | 0.0105   | THRSP     |
| 3516.97  | 7.430291 | -7068 | 7.36E-05 | 605 | 0.333333 | 0.00986  | TRERF1    |
| 2274.492 | 7.899878 | -7068 | 7.28E-05 | 466 | 0.333333 | 0.007606 | TRAM1L1   |
| 306.5265 | 6.910251 | -7068 | 7.10E-05 | 161 | 0.333333 | 0.002013 | KRT80     |
| 893.2697 | 9.298422 | -7068 | 7.17E-05 | 254 | 0.333333 | 0.003954 | SLC30A8   |
| 934.5619 | 7.786483 | -7068 | 7.17E-05 | 275 | 0.25     | 0.003563 | P2RY13    |
| 339.9951 | 6.648524 | -7068 | 7.10E-05 | 187 | 0.333333 | 0.002498 | CARD16    |
| 1709.842 | 8.752268 | -7068 | 7.25E-05 | 378 | 0.333333 | 0.006405 | TMEM229B  |
| 1417.055 | 8.759899 | -7068 | 7.21E-05 | 334 | 0.333333 | 0.005178 | CCNYL1    |
| 2029.749 | 10.01804 | -7068 | 7.23E-05 | 360 | 0.333333 | 0.005438 | RHEBL1    |
| 1466.395 | 11.34282 | -7068 | 7.18E-05 | 277 | 0.25     | 0.00407  | CRYGS     |
| 2510.077 | 7.915944 | -7068 | 7.30E-05 | 485 | 0.333333 | 0.007778 | WBSCR17   |
| 6571.684 | 7.816418 | -7068 | 7.48E-05 | 801 | 0.333333 | 0.013312 | B3GNT7    |
| 3097.105 | 8.980986 | -7068 | 7.31E-05 | 499 | 0.25     | 0.007951 | CACNA2D4  |
| 3772.617 | 7.999745 | -7068 | 7.35E-05 | 585 | 0.333333 | 0.009152 | BTNL9     |
| 1944.64  | 9.486915 | -7068 | 7.21E-05 | 327 | 0.333333 | 0.003798 | SULT1A2   |
| 711.7685 | 10.23223 | -7068 | 7.15E-05 | 207 | 0.333333 | 0.002915 | HERC6     |
| 895.6742 | 10.87033 | -7068 | 7.13E-05 | 203 | 0.333333 | 0.00219  | MIB2      |
| 2775.767 | 8.429533 | -7068 | 7.31E-05 | 496 | 0.25     | 0.008016 | KLC3      |
| 1412.754 | 7.491478 | -7068 | 7.24E-05 | 380 | 0.333333 | 0.006198 | PYCR2     |
| 2991.042 | 8.383661 | -7068 | 7.31E-05 | 515 | 0.333333 | 0.008261 | FOXQ1     |
| 276.1481 | 8.401789 | -7068 | 6.99E-05 | 114 | 0.333333 | 0.001158 | ZNF720    |
| 846.0055 | 7.20178  | -7068 | 7.18E-05 | 291 | 0.333333 | 0.004415 | CTDSPL2   |
| 3742.855 | 8.617322 | -7068 | 7.34E-05 | 555 | 0.333333 | 0.008423 | TIMM23    |
| 2065.716 | 9.0813   | -7068 | 7.26E-05 | 406 | 0.333333 | 0.006681 | SNRNP48   |
| 729.7522 | 9.464245 | -7068 | 7.15E-05 | 224 | 0.333333 | 0.003167 | PKN3      |
| 1521.159 | 7.463104 | -7068 | 7.22E-05 | 377 | 0.25     | 0.005668 | SAMD9L    |
| 2559.187 | 8.879643 | -7068 | 7.28E-05 | 443 | 0.333333 | 0.007421 | ATOH7     |
| 4942.162 | 30.05923 | -7068 | 7.09E-05 | 182 | 0.25     | 0.001513 | OR1D5     |
| 1067.225 | 12.74929 | -7068 | 7.14E-05 | 199 | 0.333333 | 0.00251  | TREML1    |
| 2626.54  | 14.46605 | -7068 | 7.18E-05 | 278 | 0.333333 | 0.003108 | ATXN1L    |
| 2696.145 | 7.096521 | -7068 | 7.33E-05 | 550 | 0.25     | 0.00907  | SLITRK6   |
| 6593.181 | 7.262871 | -7068 | 7.50E-05 | 844 | 0.333333 | 0.014035 | RASGEF1B  |
| 1202.7   | 8.20307  | -7068 | 7.20E-05 | 318 | 0.333333 | 0.004686 | ABCG8     |
| 1141.186 | 8.503709 | -7068 | 7.19E-05 | 295 | 0.333333 | 0.004068 | ADGRG7    |

|          |          |       |          |      |          |          |          |
|----------|----------|-------|----------|------|----------|----------|----------|
| 1517.976 | 8.397358 | -7068 | 7.21E-05 | 339  | 0.333333 | 0.004521 | DUOX1    |
| 563.9083 | 8.917428 | -7068 | 7.14E-05 | 206  | 0.333333 | 0.002857 | ASPHD2   |
| 7266.833 | 6.97788  | -7068 | 7.55E-05 | 921  | 0.333333 | 0.015172 | TMEM199  |
| 815.4612 | 12.42933 | -7068 | 7.13E-05 | 181  | 0.333333 | 0.002491 | CFAP161  |
| 136.5334 | 12.1367  | -7068 | 6.97E-05 | 76   | 0.25     | 0.001038 | C4orf46  |
| 1105.739 | 3.894841 | -7068 | 7.21E-05 | 453  | 0.333333 | 0.005503 | CENPH    |
| 2456.761 | 9.279296 | -7068 | 7.18E-05 | 344  | 0.333333 | 0.003677 | ZNF25    |
| 3297.57  | 7.045422 | -7068 | 7.36E-05 | 609  | 0.333333 | 0.009997 | CMTM4    |
| 1195.459 | 9.340191 | -7068 | 7.18E-05 | 288  | 0.25     | 0.004356 | NXPH1    |
| 531.3886 | 10.62858 | -7068 | 7.13E-05 | 177  | 0.333333 | 0.002497 | MEX3D    |
| 4440.324 | 9.185023 | -7068 | 7.34E-05 | 566  | 0.25     | 0.008698 | ANKRD22  |
| 3427.961 | 8.52369  | -7068 | 7.33E-05 | 535  | 0.333333 | 0.008331 | LRRC25   |
| 10799.09 | 7.467288 | -7068 | 7.62E-05 | 1051 | 0.333333 | 0.017075 | GLIS3    |
| 3555.423 | 11.15006 | -7068 | 7.23E-05 | 388  | 0.333333 | 0.004802 | ZIM3     |
| 744.6425 | 10.37296 | -7068 | 7.13E-05 | 201  | 0.333333 | 0.00297  | PCDHB5   |
| 5372.719 | 7.401509 | -7068 | 7.45E-05 | 751  | 0.333333 | 0.012099 | ELOVL7   |
| 747.8384 | 9.241487 | -7068 | 7.16E-05 | 231  | 0.333333 | 0.003558 | ANKRD18A |
| 12157.47 | 327.0743 | -7068 | 6.91E-05 | 41   | 0.333333 | 4.83E-04 | PRAMEF1  |
| 1613.087 | 14.93668 | -7068 | 7.14E-05 | 205  | 0.333333 | 0.002369 | EVI5L    |
| 411.4974 | 5.283482 | -7068 | 7.12E-05 | 229  | 0.25     | 0.003039 | MPEG1    |
| 636.5238 | 6.671209 | -7068 | 7.15E-05 | 256  | 0.333333 | 0.003465 | NLRC4    |
| 657.2944 | 9.875845 | -7068 | 7.13E-05 | 190  | 0.333333 | 0.002598 | ATP6V1G3 |
| 1248.141 | 12.29005 | -7068 | 7.12E-05 | 214  | 0.25     | 0.002138 | ZNF697   |
| 4193.506 | 7.052166 | -7068 | 7.41E-05 | 688  | 0.333333 | 0.011167 | SPECC1   |
| 2131.368 | 8.300871 | -7068 | 7.22E-05 | 374  | 0.333333 | 0.003887 | PRAM1    |
| 1638.458 | 8.840939 | -7068 | 7.20E-05 | 341  | 0.333333 | 0.00447  | TXNDC17  |
| 2574.663 | 11.71261 | -7068 | 7.23E-05 | 349  | 0.333333 | 0.005326 | TEX19    |
| 1267.746 | 8.48174  | -7068 | 7.20E-05 | 322  | 0.333333 | 0.004662 | AIFM2    |
| 459.2125 | 9.469554 | -7068 | 7.09E-05 | 167  | 0.25     | 0.001981 | TRAPPC5  |
| 525.917  | 7.390057 | -7068 | 7.11E-05 | 209  | 0.333333 | 0.002777 | MRPL54   |
| 2059.439 | 10.1732  | -7068 | 7.24E-05 | 365  | 0.333333 | 0.005641 | OTOS     |
| 1972.718 | 10.65473 | -7068 | 7.19E-05 | 313  | 0.25     | 0.003895 | LDHD     |
| 1906.778 | 6.647229 | -7068 | 7.28E-05 | 473  | 0.333333 | 0.007652 | SKA2     |
| 6534.168 | 7.189765 | -7068 | 7.50E-05 | 847  | 0.333333 | 0.014263 | CPEB2    |
| 7189.2   | 34.93667 | -7068 | 7.15E-05 | 221  | 0.333333 | 0.002145 | OR8B8    |
| 1196.633 | 7.211812 | -7068 | 7.20E-05 | 340  | 0.333333 | 0.004722 | TIRAP    |
| 911.6438 | 12.12612 | -7068 | 7.13E-05 | 200  | 0.25     | 0.002989 | CATSPERD |
| 1456.143 | 8.107684 | -7068 | 7.23E-05 | 362  | 0.333333 | 0.005502 | SGTB     |
| 649.6778 | 8.106289 | -7068 | 7.15E-05 | 240  | 0.333333 | 0.003749 | SCNM1    |
| 998.7566 | 7.523083 | -7068 | 7.17E-05 | 299  | 0.25     | 0.004419 | GTF3C6   |
| 830.5892 | 10.79013 | -7068 | 7.15E-05 | 211  | 0.333333 | 0.002693 | MYH14    |

|          |          |       |          |     |          |          |          |
|----------|----------|-------|----------|-----|----------|----------|----------|
| 66.03063 | 9.157003 | -7068 | 6.93E-05 | 63  | 0.25     | 8.51E-04 | SLC2A13  |
| 1173.163 | 9.808836 | -7068 | 7.18E-05 | 273 | 0.333333 | 0.0042   | SLC26A11 |
| 2228.13  | 7.917961 | -7068 | 7.27E-05 | 451 | 0.333333 | 0.00702  | GALNT15  |
| 596.705  | 8.712867 | -7068 | 7.11E-05 | 198 | 0.333333 | 0.002647 | ZXDA     |
| 388.5448 | 10.84963 | -7068 | 7.09E-05 | 145 | 0.25     | 0.00202  | P4HA3    |
| 112.3218 | 11.69623 | -7068 | 6.97E-05 | 70  | 0.25     | 8.43E-04 | KCNRG    |
| 714.8726 | 8.682394 | -7068 | 7.14E-05 | 220 | 0.333333 | 0.003094 | SYTL4    |
| 77.29416 | 11.22036 | -7068 | 6.64E-05 | 43  | 0.25     | 4.10E-04 | FABP12   |
| 1350.621 | 17.83891 | -7068 | 7.08E-05 | 122 | 0.25     | 0.001478 | MAGEB18  |
| 530.7619 | 10.17959 | -7068 | 7.10E-05 | 169 | 0.333333 | 0.002216 | BMP8B    |
| 4468.803 | 8.773887 | -7068 | 7.36E-05 | 597 | 0.333333 | 0.009617 | IRX2     |
| 3019.157 | 8.580554 | -7068 | 7.28E-05 | 474 | 0.333333 | 0.006669 | HOGA1    |
| 825.2001 | 8.410618 | -7068 | 7.15E-05 | 242 | 0.333333 | 0.003482 | NOG      |
| 1715.598 | 7.514437 | -7068 | 7.25E-05 | 417 | 0.333333 | 0.006731 | SLC16A3  |
| 757.9245 | 8.853318 | -7068 | 7.16E-05 | 239 | 0.333333 | 0.003616 | ABCA9    |
| 957.6127 | 8.298876 | -7068 | 7.17E-05 | 275 | 0.333333 | 0.003885 | HTRA3    |
| 1098.928 | 9.636323 | -7068 | 7.18E-05 | 270 | 0.333333 | 0.004022 | TRIM49   |
| 1524.389 | 12.33749 | -7068 | 7.15E-05 | 236 | 0.333333 | 0.002663 | HES4     |
| 5028.153 | 9.093125 | -7068 | 7.35E-05 | 600 | 0.333333 | 0.009218 | ANKRD37  |
| 409.7303 | 12.19399 | -7068 | 7.05E-05 | 119 | 0.25     | 0.001418 | LRRC39   |
| 111.089  | 9.266118 | -7068 | 6.99E-05 | 85  | 0.25     | 0.001147 | DOK7     |
| 1404.923 | 11.20896 | -7068 | 7.17E-05 | 256 | 0.25     | 0.003937 | KBTBD12  |
| 1279.079 | 10.42702 | -7068 | 7.18E-05 | 279 | 0.333333 | 0.004085 | TRIM59   |
| 202.1971 | 7.785529 | -7068 | 7.06E-05 | 137 | 0.25     | 0.002034 | DUSP8    |
| 3282.547 | 6.32952  | -7068 | 7.38E-05 | 652 | 0.333333 | 0.01077  | DBNDD2   |
| 5300.403 | 8.577276 | -7068 | 7.41E-05 | 666 | 0.333333 | 0.011142 | SPEF2    |
| 2889.226 | 12.55757 | -7068 | 7.18E-05 | 290 | 0.333333 | 0.002873 | IL17C    |
| 305.8051 | 8.582291 | -7068 | 7.07E-05 | 155 | 0.333333 | 0.002416 | FAM102B  |
| 1254.825 | 5.934871 | -7068 | 7.25E-05 | 410 | 0.333333 | 0.006512 | MTRF2    |
| 866.056  | 9.244399 | -7068 | 7.16E-05 | 247 | 0.333333 | 0.003322 | EXOSC6   |
| 619.4014 | 8.603801 | -7068 | 7.14E-05 | 224 | 0.333333 | 0.003504 | MTIF3    |
| 321.0856 | 7.535852 | -7068 | 7.10E-05 | 172 | 0.333333 | 0.002637 | COMMD6   |
| 4083.291 | 6.865732 | -7068 | 7.42E-05 | 700 | 0.333333 | 0.011793 | CLIC6    |
| 4553.409 | 7.092763 | -7068 | 7.44E-05 | 723 | 0.333333 | 0.012185 | DIS3L2   |
| 1904.251 | 7.046818 | -7068 | 7.29E-05 | 464 | 0.333333 | 0.00768  | FAM171B  |
| 1305.166 | 8.377948 | -7068 | 7.19E-05 | 314 | 0.25     | 0.00462  | VSIG2    |
| 484.2714 | 7.186689 | -7068 | 7.13E-05 | 217 | 0.25     | 0.003088 | CD163L1  |
| 4456.161 | 7.168012 | -7068 | 7.41E-05 | 701 | 0.333333 | 0.011289 | FAM43A   |
| 2186.641 | 7.745176 | -7068 | 7.29E-05 | 460 | 0.333333 | 0.007332 | ARRDC2   |
| 452.7894 | 11.04969 | -7068 | 7.10E-05 | 149 | 0.333333 | 0.002033 | IQCD     |
| 6258.924 | 7.553734 | -7068 | 7.48E-05 | 802 | 0.333333 | 0.01305  | CLDN2    |

|          |          |       |          |     |          |          |          |
|----------|----------|-------|----------|-----|----------|----------|----------|
| 3540.815 | 11.88286 | -7068 | 7.22E-05 | 346 | 0.333333 | 0.003964 | GPR142   |
| 905.7055 | 3.660893 | -7068 | 7.21E-05 | 425 | 0.333333 | 0.005311 | CENPK    |
| 6584.683 | 8.020178 | -7068 | 7.46E-05 | 775 | 0.333333 | 0.01271  | WSCD1    |
| 330.2083 | 9.060977 | -7068 | 7.09E-05 | 153 | 0.333333 | 0.002038 | GLMP     |
| 811.2598 | 9.018856 | -7068 | 7.15E-05 | 238 | 0.333333 | 0.003115 | RAB3D    |
| 956.5084 | 8.092883 | -7068 | 7.19E-05 | 298 | 0.333333 | 0.004839 | VKORC1L1 |
| 2362.15  | 7.849523 | -7068 | 7.29E-05 | 476 | 0.333333 | 0.007794 | NANOS1   |
| 808.0469 | 11.10071 | -7068 | 7.14E-05 | 197 | 0.333333 | 0.003128 | JPH1     |
| 613.7533 | 11.42191 | -7068 | 7.11E-05 | 165 | 0.333333 | 0.002132 | STAC3    |
| 1664.052 | 6.338092 | -7068 | 7.26E-05 | 442 | 0.333333 | 0.006742 | ASPM     |
| 925.1149 | 6.414059 | -7068 | 7.18E-05 | 308 | 0.333333 | 0.004043 | FCGR1B   |
| 1473.499 | 7.779357 | -7068 | 7.24E-05 | 381 | 0.333333 | 0.005939 | PCSK9    |
| 889.1242 | 6.465624 | -7068 | 7.20E-05 | 324 | 0.333333 | 0.004772 | AKR1C1   |
| 1168.376 | 4.80639  | -7068 | 7.23E-05 | 425 | 0.333333 | 0.00537  | DSN1     |
| 1516.233 | 9.540482 | -7068 | 7.21E-05 | 323 | 0.333333 | 0.004642 | CCL26    |
| 1839.814 | 7.16692  | -7068 | 7.27E-05 | 447 | 0.333333 | 0.00724  | RDH10    |
| 932.3642 | 8.121146 | -7068 | 7.18E-05 | 291 | 0.25     | 0.004781 | SLC16A12 |
| 1279.353 | 7.620504 | -7068 | 7.21E-05 | 342 | 0.333333 | 0.004687 | NAT8     |
| 856.6535 | 9.790152 | -7068 | 7.14E-05 | 224 | 0.333333 | 0.003138 | BEX5     |
| 1184.618 | 8.904017 | -7068 | 7.19E-05 | 300 | 0.25     | 0.004537 | RXFP1    |
| 5167.523 | 11.3286  | -7068 | 7.31E-05 | 506 | 0.333333 | 0.007186 | GPR26    |
| 436.9075 | 9.179435 | -7068 | 7.10E-05 | 169 | 0.333333 | 0.002381 | LEFTY2   |
| 380.6493 | 9.525784 | -7068 | 7.06E-05 | 144 | 0.25     | 0.001676 | RAET1E   |
| 2274.083 | 21.35966 | -7068 | 7.11E-05 | 197 | 0.333333 | 0.00167  | SSX2     |
| 594.72   | 12.07337 | -7068 | 7.11E-05 | 160 | 0.333333 | 0.002221 | CCDC96   |
| 735.9267 | 7.317259 | -7068 | 7.16E-05 | 264 | 0.333333 | 0.003723 | EPB41L4B |
| 1411.043 | 7.859572 | -7068 | 7.23E-05 | 369 | 0.25     | 0.005914 | GP1BB    |
| 983.5222 | 7.497931 | -7068 | 7.20E-05 | 301 | 0.333333 | 0.004544 | KCNIP3   |
| 2538.005 | 9.204369 | -7068 | 7.29E-05 | 457 | 0.333333 | 0.007684 | SYNE3    |
| 2335.939 | 10.57797 | -7068 | 7.22E-05 | 365 | 0.333333 | 0.005374 | NFKBID   |
| 651.4521 | 8.174583 | -7068 | 7.15E-05 | 240 | 0.333333 | 0.003853 | SDHAF4   |
| 771.6766 | 8.709059 | -7068 | 7.15E-05 | 238 | 0.333333 | 0.003419 | NTF4     |
| 396.9065 | 7.780552 | -7068 | 7.11E-05 | 185 | 0.333333 | 0.002576 | SURF6    |
| 2035.036 | 6.627245 | -7068 | 7.28E-05 | 475 | 0.333333 | 0.007148 | CDCA5    |
| 2006.065 | 15.13486 | -7068 | 7.16E-05 | 219 | 0.333333 | 0.002244 | TRIM16L  |
| 4016.749 | 7.621575 | -7068 | 7.38E-05 | 637 | 0.333333 | 0.010296 | HMCN1    |
| 1887.426 | 9.580014 | -7068 | 7.23E-05 | 364 | 0.333333 | 0.005946 | IRX3     |
| 885.7459 | 8.025352 | -7068 | 7.16E-05 | 278 | 0.333333 | 0.003416 | CLSPN    |
| 1753.563 | 11.79175 | -7068 | 7.20E-05 | 296 | 0.333333 | 0.004746 | LDHAL6A  |
| 598.7132 | 8.708532 | -7068 | 7.16E-05 | 223 | 0.333333 | 0.003585 | TCP11L2  |
| 2730.012 | 7.67168  | -7068 | 7.30E-05 | 509 | 0.25     | 0.007927 | METRNL   |

|          |          |       |          |     |          |          |          |
|----------|----------|-------|----------|-----|----------|----------|----------|
| 1017.115 | 8.204078 | -7068 | 7.19E-05 | 299 | 0.333333 | 0.005011 | DACT2    |
| 1242.653 | 8.703621 | -7068 | 7.21E-05 | 318 | 0.333333 | 0.005119 | CPLX4    |
| 619.8406 | 11.93729 | -7068 | 7.10E-05 | 149 | 0.25     | 0.001708 | GJA10    |
| 1143.673 | 7.941234 | -7068 | 7.20E-05 | 306 | 0.333333 | 0.004162 | C5AR1    |
| 5784.365 | 8.014261 | -7068 | 7.45E-05 | 742 | 0.333333 | 0.011984 | EYS      |
| 953.4374 | 10.93952 | -7068 | 7.16E-05 | 220 | 0.333333 | 0.002917 | MFRP     |
| 2544.552 | 6.852345 | -7068 | 7.33E-05 | 553 | 0.333333 | 0.00911  | RMI2     |
| 2568.437 | 7.162105 | -7068 | 7.33E-05 | 527 | 0.333333 | 0.008307 | SKA3     |
| 1163.94  | 11.10413 | -7068 | 7.16E-05 | 245 | 0.333333 | 0.003545 | SLC30A2  |
| 963.1526 | 10.71391 | -7068 | 7.15E-05 | 230 | 0.333333 | 0.003201 | SYNE4    |
| 787.8485 | 11.74091 | -7068 | 7.14E-05 | 197 | 0.333333 | 0.002862 | IL23R    |
| 592.5009 | 9.791092 | -7068 | 7.12E-05 | 191 | 0.333333 | 0.00241  | TMEM256  |
| 2831.547 | 7.158725 | -7068 | 7.33E-05 | 560 | 0.333333 | 0.009082 | TMEM92   |
| 386.0698 | 9.235455 | -7068 | 7.10E-05 | 162 | 0.333333 | 0.00206  | FAM86C1  |
| 2402.003 | 8.537653 | -7068 | 7.27E-05 | 437 | 0.333333 | 0.006838 | GLIS1    |
| 1429.399 | 8.788348 | -7068 | 7.23E-05 | 347 | 0.333333 | 0.0058   | TMEM26   |
| 2857.867 | 7.353653 | -7068 | 7.34E-05 | 551 | 0.333333 | 0.009177 | FTMT     |
| 2787.092 | 11.32362 | -7068 | 7.23E-05 | 361 | 0.333333 | 0.004493 | CXCL16   |
| 3422.821 | 6.844026 | -7068 | 7.39E-05 | 645 | 0.333333 | 0.010978 | CEP128   |
| 1110.144 | 8.060103 | -7068 | 7.19E-05 | 312 | 0.333333 | 0.004641 | HAUS8    |
| 469.5612 | 10.29025 | -7068 | 7.05E-05 | 142 | 0.333333 | 0.001424 | KLK4     |
| 1839.67  | 8.938564 | -7068 | 7.22E-05 | 362 | 0.333333 | 0.004839 | LAMC3    |
| 1070.524 | 10.75241 | -7068 | 7.16E-05 | 248 | 0.25     | 0.003729 | NUDT16   |
| 142.0223 | 9.558272 | -7068 | 7.04E-05 | 94  | 0.333333 | 0.001208 | BCL2L15  |
| 166.3714 | 11.776   | -7068 | 6.99E-05 | 80  | 0.333333 | 9.49E-04 | FNDC9    |
| 6184.495 | 36.74561 | -7068 | 7.12E-05 | 194 | 0.333333 | 0.00214  | OR10P1   |
| 172.6884 | 2.396015 | -7068 | 6.96E-05 | 153 | 0.333333 | 7.32E-04 | ZNF568   |
| 881.3267 | 6.000873 | -7068 | 7.09E-05 | 242 | 0.25     | 0.001973 | ZNF585A  |
| 384.0405 | 7.851193 | -7068 | 7.12E-05 | 188 | 0.333333 | 0.002909 | EPN2     |
| 483.9706 | 11.04186 | -7068 | 7.08E-05 | 154 | 0.333333 | 0.001796 | SPRYD4   |
| 1088.79  | 9.413111 | -7068 | 7.18E-05 | 270 | 0.333333 | 0.003958 | ZDHHC23  |
| 2678.747 | 8.184111 | -7068 | 7.30E-05 | 490 | 0.333333 | 0.007537 | ACOT4    |
| 384.3251 | 11.60779 | -7068 | 7.07E-05 | 136 | 0.25     | 0.001736 | PILRB    |
| 186.1185 | 13.46777 | -7068 | 7.00E-05 | 77  | 0.333333 | 8.49E-04 | TMEM31   |
| 640.9602 | 12.68202 | -7068 | 7.10E-05 | 157 | 0.25     | 0.002158 | SLCO6A1  |
| 680.5442 | 15.34878 | -7068 | 7.09E-05 | 144 | 0.333333 | 0.001924 | TDRD9    |
| 1134.15  | 7.771938 | -7068 | 7.22E-05 | 335 | 0.333333 | 0.005547 | TMEM86A  |
| 832.6156 | 12.11126 | -7068 | 7.11E-05 | 177 | 0.333333 | 0.002035 | SLC16A11 |
| 598.6395 | 10.09833 | -7068 | 7.12E-05 | 187 | 0.333333 | 0.002558 | PKDCC    |
| 3223.341 | 7.106314 | -7068 | 7.36E-05 | 598 | 0.333333 | 0.009879 | SHISA2   |
| 351.0474 | 10.83706 | -7068 | 7.07E-05 | 133 | 0.25     | 0.001698 | CEP126   |



|          |          |       |          |     |          |          |           |
|----------|----------|-------|----------|-----|----------|----------|-----------|
| 77.39301 | 10.94784 | -7068 | 6.91E-05 | 61  | 0.25     | 8.05E-04 | C15orf65  |
| 3.630486 | 6.545139 | -7068 | 6.16E-05 | 15  | 0.25     | 1.82E-04 | RSPH10B   |
| 1298.488 | 10.0738  | -7068 | 7.16E-05 | 241 | 0.25     | 0.003673 | MORN2     |
| 533.5736 | 8.125332 | -7068 | 7.13E-05 | 214 | 0.25     | 0.003226 | SIAE      |
| 2129.728 | 8.447986 | -7068 | 7.27E-05 | 420 | 0.333333 | 0.006996 | NUP210L   |
| 1652.646 | 4.487147 | -7068 | 7.21E-05 | 472 | 0.333333 | 0.004626 | ORM2      |
| 1205.125 | 10.9583  | -7068 | 7.15E-05 | 242 | 0.333333 | 0.003175 | ABHD15    |
| 746.4125 | 7.052804 | -7068 | 7.17E-05 | 277 | 0.333333 | 0.004092 | ACOT2     |
| 403.628  | 11.42877 | -7068 | 7.06E-05 | 129 | 0.333333 | 0.001378 | SLC45A1   |
| 3452.71  | 7.421622 | -7068 | 7.36E-05 | 604 | 0.333333 | 0.0103   | SAMD12    |
| 196.2622 | 12.32455 | -7068 | 7.00E-05 | 82  | 0.333333 | 8.82E-04 | NYAP1     |
| 581.7106 | 11.34466 | -7068 | 7.13E-05 | 161 | 0.333333 | 0.002262 | SERPINA12 |
| 359.2555 | 10.61615 | -7068 | 7.09E-05 | 144 | 0.333333 | 0.00206  | ELOVL3    |
| 363.1737 | 12.4527  | -7068 | 7.08E-05 | 115 | 0.333333 | 0.001526 | LETM2     |
| 612.566  | 7.065551 | -7068 | 7.14E-05 | 242 | 0.333333 | 0.003222 | ZC3H18    |
| 794.9988 | 9.947913 | -7068 | 7.15E-05 | 225 | 0.333333 | 0.003032 | HNRNPUL2  |
| 496.4276 | 4.484372 | -7068 | 7.02E-05 | 199 | 0.25     | 0.001234 | ZNF404    |
| 612.8086 | 5.248737 | -7068 | 7.05E-05 | 206 | 0.25     | 0.0013   | ZNF177    |
| 781.0505 | 9.301522 | -7068 | 7.16E-05 | 235 | 0.333333 | 0.003429 | CLDN19    |
| 1429.064 | 9.833716 | -7068 | 7.20E-05 | 310 | 0.333333 | 0.004455 | RNF183    |
| 604.9597 | 7.86876  | -7068 | 7.14E-05 | 237 | 0.25     | 0.003426 | NDUFA4L2  |
| 1932.586 | 9.337426 | -7068 | 7.22E-05 | 350 | 0.333333 | 0.004726 | RHOV      |
| 860.1896 | 9.93704  | -7068 | 7.14E-05 | 231 | 0.333333 | 0.003384 | CHMP4C    |
| 1465.849 | 7.44581  | -7068 | 7.25E-05 | 393 | 0.333333 | 0.00647  | RAB3IP    |
| 1379.18  | 8.558378 | -7068 | 7.22E-05 | 343 | 0.333333 | 0.005455 | GPRIN1    |
| 913.2377 | 9.40318  | -7068 | 7.17E-05 | 254 | 0.333333 | 0.003807 | HYKK      |
| 984.3709 | 8.98153  | -7068 | 7.18E-05 | 267 | 0.333333 | 0.004015 | GRK7      |
| 985.0857 | 9.398856 | -7068 | 7.17E-05 | 262 | 0.25     | 0.004028 | PROM2     |
| 1840.365 | 7.1413   | -7068 | 7.29E-05 | 461 | 0.333333 | 0.00785  | UBE3D     |
| 549.4732 | 7.7019   | -7068 | 7.14E-05 | 223 | 0.333333 | 0.003479 | VEGFD     |
| 835.5862 | 8.75683  | -7068 | 7.16E-05 | 252 | 0.333333 | 0.003632 | GPIHBP1   |
| 2029.565 | 7.194745 | -7068 | 7.29E-05 | 473 | 0.333333 | 0.007876 | CDCA2     |
| 1340.273 | 10.80598 | -7068 | 7.18E-05 | 275 | 0.333333 | 0.003613 | GSG2      |
| 1921.54  | 8.688517 | -7068 | 7.25E-05 | 395 | 0.333333 | 0.006471 | IL31RA    |
| 383.5721 | 11.09802 | -7068 | 7.07E-05 | 129 | 0.25     | 0.001455 | EFCAB12   |
| 1877.936 | 8.399281 | -7068 | 7.25E-05 | 395 | 0.333333 | 0.006064 | SCARA5    |
| 644.2526 | 14.03092 | -7068 | 7.03E-05 | 110 | 0.333333 | 0.001214 | TBC1D3F   |
| 145.1091 | 8.831151 | -7068 | 7.00E-05 | 95  | 0.25     | 0.00116  | DAPL1     |
| 2170.869 | 9.279344 | -7068 | 7.23E-05 | 382 | 0.25     | 0.005496 | IL20RB    |
| 1489.991 | 10.10211 | -7068 | 7.15E-05 | 259 | 0.333333 | 0.003066 | GPR34     |
| 1110.715 | 8.011433 | -7068 | 7.17E-05 | 287 | 0.333333 | 0.003524 | P2RY12    |

|          |          |       |          |     |          |          |          |
|----------|----------|-------|----------|-----|----------|----------|----------|
| 315.2685 | 9.813451 | -7068 | 7.10E-05 | 140 | 0.333333 | 0.001943 | HAPLN4   |
| 320.9556 | 10.0775  | -7068 | 7.07E-05 | 133 | 0.333333 | 0.001751 | SLC35F1  |
| 436.5465 | 11.89245 | -7068 | 7.08E-05 | 135 | 0.333333 | 0.00168  | PRRT3    |
| 630.069  | 8.480972 | -7068 | 7.15E-05 | 222 | 0.333333 | 0.003121 | EPPK1    |
| 1606.848 | 9.858944 | -7068 | 7.19E-05 | 302 | 0.25     | 0.004205 | ANKRD35  |
| 528.1886 | 11.17741 | -7068 | 7.11E-05 | 160 | 0.333333 | 0.002114 | RDH12    |
| 1397.226 | 7.777815 | -7068 | 7.23E-05 | 364 | 0.333333 | 0.005783 | ZFYVE28  |
| 1746.257 | 7.07501  | -7068 | 7.27E-05 | 445 | 0.333333 | 0.007475 | EPDR1    |
| 4030.3   | 7.961145 | -7068 | 7.37E-05 | 619 | 0.333333 | 0.010356 | MAB21L3  |
| 249.7822 | 12.86169 | -7068 | 7.05E-05 | 97  | 0.333333 | 0.001198 | MAB21L2  |
| 1648.35  | 7.731376 | -7068 | 7.25E-05 | 405 | 0.333333 | 0.006887 | ADAMTS18 |
| 1445.112 | 8.552305 | -7068 | 7.22E-05 | 340 | 0.333333 | 0.005254 | KANK4    |
| 1399.415 | 14.46673 | -7068 | 7.12E-05 | 180 | 0.333333 | 0.001734 | SPSB4    |
| 519.8557 | 13.0654  | -7068 | 7.06E-05 | 130 | 0.333333 | 0.001427 | CLEC4F   |
| 384.8908 | 9.582789 | -7068 | 7.03E-05 | 121 | 0.333333 | 0.001072 | OPN1LW   |
| 235.5962 | 14.23786 | -7068 | 7.06E-05 | 88  | 0.333333 | 0.001088 | SMCR8    |
| 229.5998 | 8.030183 | -7068 | 7.05E-05 | 135 | 0.25     | 0.002076 | FNDC1    |
| 1167.959 | 7.388742 | -7068 | 7.21E-05 | 336 | 0.333333 | 0.004892 | RASD1    |
| 2180.593 | 12.46597 | -7068 | 7.22E-05 | 326 | 0.333333 | 0.004973 | APLF     |
| 3064.169 | 9.870518 | -7068 | 7.22E-05 | 384 | 0.333333 | 0.004403 | ZFP62    |
| 342.3378 | 11.79371 | -7068 | 7.08E-05 | 118 | 0.333333 | 0.00147  | CERS1    |
| 234.628  | 9.431384 | -7068 | 7.09E-05 | 124 | 0.333333 | 0.001985 | MAP7D2   |
| 171.7626 | 10.1854  | -7068 | 7.04E-05 | 99  | 0.333333 | 0.001299 | LYPD6B   |
| 2253.355 | 9.005682 | -7068 | 7.26E-05 | 414 | 0.333333 | 0.006632 | FAM83B   |
| 661.292  | 7.128404 | -7068 | 7.15E-05 | 257 | 0.333333 | 0.003869 | FNDC3B   |
| 772.1514 | 9.86406  | -7068 | 7.14E-05 | 215 | 0.333333 | 0.002909 | RAB43    |
| 268.5136 | 8.863857 | -7068 | 7.06E-05 | 136 | 0.333333 | 0.001637 | SDHAF1   |
| 158.3195 | 9.77112  | -7068 | 6.97E-05 | 91  | 0.25     | 0.001038 | MUC20    |
| 31.26654 | 12.75656 | -7068 | 6.63E-05 | 35  | 0.25     | 3.72E-04 | GLOD5    |
| 1304.505 | 9.961748 | -7068 | 7.17E-05 | 264 | 0.333333 | 0.003449 | TMC4     |
| 1486.716 | 10.06405 | -7068 | 7.19E-05 | 296 | 0.333333 | 0.004499 | LRR1     |
| 173.8496 | 10.89627 | -7068 | 7.04E-05 | 92  | 0.333333 | 9.96E-04 | AGBL3    |
| 201.7339 | 14.69405 | -7068 | 6.99E-05 | 80  | 0.333333 | 9.66E-04 | GTPBP10  |
| 2399.689 | 8.374165 | -7068 | 7.29E-05 | 456 | 0.333333 | 0.007448 | CEP57L1  |
| 971.2817 | 8.544664 | -7068 | 7.17E-05 | 282 | 0.333333 | 0.004105 | PHF19    |
| 1021.684 | 4.787028 | -7068 | 7.22E-05 | 394 | 0.333333 | 0.00548  | KIF18B   |
| 4855.457 | 8.231558 | -7068 | 7.39E-05 | 659 | 0.333333 | 0.010224 | ZNF367   |
| 272.5543 | 10.63627 | -7068 | 7.08E-05 | 120 | 0.333333 | 0.001651 | SLC35D3  |
| 717.3768 | 8.398379 | -7068 | 7.12E-05 | 224 | 0.333333 | 0.002757 | CCDC137  |
| 493.493  | 5.8005   | -7068 | 7.15E-05 | 250 | 0.333333 | 0.00332  | PPAN     |
| 624.0233 | 9.116176 | -7068 | 7.15E-05 | 208 | 0.333333 | 0.002825 | ADAMTS4  |

|          |          |       |          |     |          |          |           |
|----------|----------|-------|----------|-----|----------|----------|-----------|
| 728.6383 | 7.752155 | -7068 | 7.13E-05 | 236 | 0.25     | 0.003016 | SLC39A5   |
| 741.3062 | 6.060461 | -7068 | 7.19E-05 | 318 | 0.333333 | 0.004954 | CYP4V2    |
| 75.87516 | 8.187944 | -7068 | 6.97E-05 | 78  | 0.25     | 0.001111 | ACER2     |
| 1177.876 | 7.502483 | -7068 | 7.12E-05 | 249 | 0.333333 | 0.002184 | ZNF616    |
| 629.1312 | 7.530069 | -7068 | 7.14E-05 | 244 | 0.333333 | 0.003731 | CDCA7L    |
| 544.907  | 8.983575 | -7068 | 7.13E-05 | 200 | 0.333333 | 0.003112 | ATP6V1C2  |
| 1006.671 | 18.29038 | -7068 | 7.05E-05 | 123 | 0.333333 | 0.001084 | C20orf144 |
| 450.7442 | 9.092077 | -7068 | 7.08E-05 | 161 | 0.333333 | 0.00218  | APITD1    |
| 257.8555 | 9.351915 | -7068 | 7.08E-05 | 134 | 0.333333 | 0.002048 | LIN54     |
| 643.6349 | 10.62005 | -7068 | 7.11E-05 | 186 | 0.333333 | 0.002516 | TSPAN33   |
| 2714.197 | 9.68379  | -7068 | 7.20E-05 | 362 | 0.333333 | 0.003992 | ZIK1      |
| 317.8743 | 7.592769 | -7068 | 7.08E-05 | 159 | 0.25     | 0.001993 | TMEM37    |
| 428.7747 | 8.891701 | -7068 | 7.09E-05 | 160 | 0.25     | 0.001982 | SLC23A3   |
| 446.6606 | 7.389966 | -7068 | 7.12E-05 | 199 | 0.25     | 0.002762 | GSTA5     |
| 2423.942 | 8.318323 | -7068 | 7.28E-05 | 455 | 0.333333 | 0.007218 | ADGRD1    |
| 814.4079 | 9.449277 | -7068 | 7.15E-05 | 233 | 0.333333 | 0.003491 | MEIOB     |
| 36.43923 | 12.28904 | -7068 | 6.81E-05 | 40  | 0.25     | 5.18E-04 | CCSAP     |
| 453.6809 | 10.27429 | -7068 | 7.11E-05 | 163 | 0.333333 | 0.00233  | HTRA4     |
| 598.2087 | 10.09794 | -7068 | 7.15E-05 | 195 | 0.333333 | 0.002946 | TRPV3     |
| 1106.233 | 9.476747 | -7068 | 7.18E-05 | 267 | 0.333333 | 0.003843 | COL6A5    |
| 973.7681 | 8.565418 | -7068 | 7.18E-05 | 276 | 0.333333 | 0.004249 | MARVELD2  |
| 185.778  | 12.86039 | -7068 | 7.03E-05 | 79  | 0.333333 | 9.24E-04 | SLC46A1   |
| 857.0718 | 9.316258 | -7068 | 7.16E-05 | 245 | 0.333333 | 0.003509 | METTL7B   |
| 557.9474 | 12.1549  | -7068 | 7.10E-05 | 151 | 0.333333 | 0.001785 | CMBL      |
| 152.5097 | 10.94429 | -7068 | 6.98E-05 | 86  | 0.25     | 0.001079 | TPRN      |
| 650.1159 | 8.36798  | -7068 | 7.14E-05 | 225 | 0.333333 | 0.003014 | FAHD1     |
| 997.9857 | 14.24999 | -7068 | 7.09E-05 | 161 | 0.333333 | 0.001538 | PNPLA5    |
| 7877.123 | 50.59077 | -7068 | 7.15E-05 | 211 | 0.333333 | 0.003105 | OR4D5     |
| 3484.441 | 33.05491 | -7068 | 7.08E-05 | 122 | 0.25     | 0.00183  | PAGE2     |
| 1266.726 | 9.149384 | -7068 | 7.20E-05 | 304 | 0.25     | 0.004774 | C1QL2     |
| 850.827  | 8.392421 | -7068 | 7.17E-05 | 264 | 0.25     | 0.004084 | C1QL3     |
| 395.6848 | 8.950606 | -7068 | 7.13E-05 | 174 | 0.333333 | 0.002915 | LY6K      |
| 5979.457 | 18.60125 | -7068 | 7.22E-05 | 366 | 0.333333 | 0.00556  | UGT1A8    |
| 302.2863 | 9.544544 | -7068 | 7.10E-05 | 147 | 0.25     | 0.002316 | TCEANC2   |
| 15.831   | 7.706122 | -7068 | 6.56E-05 | 32  | 0.25     | 3.32E-04 | C6orf223  |
| 393.6987 | 13.25273 | -7068 | 7.08E-05 | 112 | 0.333333 | 0.001237 | TRIM51    |
| 32.83326 | 7.645904 | -7068 | 6.70E-05 | 43  | 0.333333 | 4.20E-04 | PRCD      |
| 720.0141 | 11.38862 | -7068 | 7.11E-05 | 166 | 0.333333 | 0.001868 | S1PR3     |
| 401.1546 | 12.99695 | -7068 | 7.09E-05 | 129 | 0.333333 | 0.001469 | D2HGDH    |
| 702.9348 | 9.163671 | -7068 | 7.08E-05 | 176 | 0.333333 | 0.001685 | OPN1MW    |
| 7752.343 | 46.26417 | -7068 | 7.11E-05 | 176 | 0.333333 | 0.001686 | KRTAP2-1  |

|          |          |       |          |     |          |          |          |
|----------|----------|-------|----------|-----|----------|----------|----------|
| 419.1705 | 8.185326 | -7068 | 7.11E-05 | 178 | 0.333333 | 0.002376 | PER1     |
| 1007.956 | 9.868928 | -7068 | 7.12E-05 | 193 | 0.333333 | 0.001855 | GPR119   |
| 408.2379 | 12.56148 | -7068 | 7.08E-05 | 129 | 0.333333 | 0.001439 | ASB16    |
| 465.1902 | 9.323125 | -7068 | 7.11E-05 | 180 | 0.333333 | 0.002578 | ATP6V0D2 |
| 716.6798 | 14.87161 | -7068 | 7.10E-05 | 151 | 0.25     | 0.002391 | SYCE1    |
| 697.8442 | 8.646471 | -7068 | 7.11E-05 | 222 | 0.333333 | 0.00306  | CHAC2    |
| 615.9857 | 8.111181 | -7068 | 7.11E-05 | 216 | 0.25     | 0.002961 | CHCHD4   |
| 118.8819 | 6.77302  | -7068 | 7.05E-05 | 115 | 0.25     | 0.001865 | FRMD3    |
| 232.0305 | 9.386022 | -7068 | 7.06E-05 | 119 | 0.333333 | 0.001624 | TMEM139  |
| 848.4986 | 10.67452 | -7068 | 7.13E-05 | 204 | 0.333333 | 0.002288 | FCAMR    |
| 47.58327 | 11.88717 | -7068 | 6.78E-05 | 44  | 0.25     | 5.40E-04 | LGALS16  |
| 841.3657 | 9.940762 | -7068 | 7.12E-05 | 208 | 0.333333 | 0.002374 | NECTIN4  |
| 217.5841 | 10.40971 | -7068 | 7.06E-05 | 114 | 0.25     | 0.001697 | DCANP1   |
| 205.7367 | 14.70092 | -7068 | 6.95E-05 | 75  | 0.25     | 8.50E-04 | TMEM99   |
| 518.5918 | 7.250174 | -7068 | 7.08E-05 | 197 | 0.333333 | 0.002125 | NAA38    |
| 364.6877 | 11.48762 | -7068 | 7.06E-05 | 125 | 0.25     | 0.001518 | KIR3DL2  |
| 270.0307 | 8.367423 | -7068 | 7.05E-05 | 130 | 0.25     | 0.001528 | SLC47A2  |
| 310.5287 | 3.647472 | -7068 | 7.02E-05 | 173 | 0.333333 | 0.001084 | ZNF845   |
| 1129.903 | 6.964971 | -7068 | 7.12E-05 | 263 | 0.333333 | 0.002444 | ZNF416   |
| 600.8492 | 10.49825 | -7068 | 7.12E-05 | 186 | 0.333333 | 0.002558 | CEP78    |
| 155.9626 | 8.975836 | -7068 | 7.06E-05 | 108 | 0.25     | 0.001504 | MPV17L   |
| 325.5967 | 9.635297 | -7068 | 7.05E-05 | 138 | 0.333333 | 0.001712 | RAB42    |
| 494.9829 | 11.77925 | -7068 | 7.12E-05 | 154 | 0.333333 | 0.00216  | MB21D1   |
| 664.7947 | 16.70692 | -7068 | 7.07E-05 | 119 | 0.25     | 0.001197 | CCDC155  |
| 3610.852 | 33.48099 | -7068 | 7.06E-05 | 131 | 0.25     | 0.001701 | CT45A5   |
| 256.0434 | 13.7732  | -7068 | 6.96E-05 | 81  | 0.333333 | 8.19E-04 | ADGRF2   |
| 646.6363 | 10.65609 | -7068 | 7.08E-05 | 166 | 0.333333 | 0.001669 | IL20     |
| 876.0843 | 12.35986 | -7068 | 7.12E-05 | 195 | 0.333333 | 0.002439 | TSTD1    |
| 145.3151 | 12.14262 | -7068 | 7.04E-05 | 81  | 0.333333 | 0.001099 | GDPD1    |
| 596.2155 | 8.893747 | -7068 | 7.12E-05 | 199 | 0.25     | 0.002841 | SRSF12   |
| 423.4637 | 9.888198 | -7068 | 7.08E-05 | 154 | 0.333333 | 0.002117 | HYLS1    |
| 1563.166 | 8.101782 | -7068 | 7.23E-05 | 374 | 0.333333 | 0.005779 | DDIAS    |
| 712.4945 | 13.26343 | -7068 | 7.13E-05 | 178 | 0.333333 | 0.00273  | PIWIL3   |
| 372.5258 | 12.90843 | -7068 | 7.05E-05 | 117 | 0.333333 | 0.001477 | RADIL    |
| 100.1202 | 11.1657  | -7068 | 6.86E-05 | 62  | 0.25     | 6.25E-04 | CSTL1    |
| 344.4168 | 15.43565 | -7068 | 6.98E-05 | 85  | 0.333333 | 7.55E-04 | COX6B2   |
| 602.8106 | 17.01813 | -7068 | 7.00E-05 | 99  | 0.25     | 9.17E-04 | C7orf61  |
| 252.5089 | 10.82595 | -7068 | 7.06E-05 | 111 | 0.333333 | 0.00151  | SPANXD   |
| 800.5522 | 13.81375 | -7068 | 7.06E-05 | 143 | 0.333333 | 0.001288 | TMEM114  |
| 1785.526 | 16.31044 | -7068 | 7.15E-05 | 213 | 0.333333 | 0.002351 | KRT40    |
| 2021.353 | 34.65442 | -7068 | 6.88E-05 | 91  | 0.25     | 6.30E-04 | OR51B4   |

|          |          |       |          |     |          |          |          |
|----------|----------|-------|----------|-----|----------|----------|----------|
| 373.6417 | 3.857488 | -7068 | 7.14E-05 | 268 | 0.333333 | 0.003593 | CENPN    |
| 378.6446 | 8.19132  | -7068 | 7.05E-05 | 160 | 0.333333 | 0.001932 | C1QTNF5  |
| 130.5495 | 15.0703  | -7068 | 6.88E-05 | 57  | 0.25     | 6.36E-04 | CCDC172  |
| 156.1957 | 12.30804 | -7068 | 6.96E-05 | 72  | 0.333333 | 8.27E-04 | CASKIN1  |
| 517.8602 | 11.42635 | -7068 | 7.04E-05 | 125 | 0.333333 | 0.00113  | NKX1-2   |
| 691.4035 | 3.601854 | -7068 | 7.18E-05 | 375 | 0.25     | 0.004224 | CFHR1    |
| 494.1365 | 10.52665 | -7068 | 7.09E-05 | 156 | 0.333333 | 0.001807 | VSIG10L  |
| 663.7233 | 15.41977 | -7068 | 7.07E-05 | 123 | 0.333333 | 0.00122  | IL27     |
| 259.2833 | 11.24594 | -7068 | 7.01E-05 | 102 | 0.333333 | 0.001127 | MUC12    |
| 63.7744  | 11.06517 | -7068 | 6.68E-05 | 45  | 0.333333 | 3.71E-04 | C11orf40 |
| 264.3151 | 12.04782 | -7068 | 7.05E-05 | 97  | 0.333333 | 0.001228 | ACP7     |
| 765.0445 | 9.130524 | -7068 | 7.15E-05 | 236 | 0.333333 | 0.003446 | SFTPA1   |
| 103.7342 | 14.5277  | -7068 | 6.58E-05 | 35  | 0.333333 | 3.06E-04 | TBC1D3B  |
| 489.5606 | 16.70066 | -7068 | 7.00E-05 | 98  | 0.25     | 8.94E-04 | BRICD5   |
| 689.7106 | 9.703636 | -7068 | 7.13E-05 | 206 | 0.333333 | 0.002663 | SBK1     |
| 441.1793 | 7.863027 | -7068 | 7.12E-05 | 191 | 0.333333 | 0.002579 | ARHGAP30 |
| 384.9787 | 8.197041 | -7068 | 7.09E-05 | 172 | 0.25     | 0.002209 | CLDN23   |
| 740.4065 | 12.01025 | -7068 | 7.10E-05 | 173 | 0.333333 | 0.001855 | CRB3     |
| 106.6831 | 13.65018 | -7068 | 6.97E-05 | 65  | 0.25     | 8.89E-04 | ALDH1L2  |
| 667.2257 | 7.91604  | -7068 | 7.14E-05 | 235 | 0.25     | 0.003378 | PPARGC1B |
| 372.3009 | 13.09383 | -7068 | 7.03E-05 | 109 | 0.333333 | 0.001197 | PRSS38   |
| 523.2903 | 17.25851 | -7068 | 7.03E-05 | 98  | 0.333333 | 9.34E-04 | TXNDC2   |
| 521.5008 | 6.1844   | -7068 | 7.12E-05 | 238 | 0.25     | 0.00319  | MT1M     |
| 289.1374 | 11.79921 | -7068 | 7.04E-05 | 112 | 0.333333 | 0.001324 | HDDC3    |
| 496.2435 | 7.371098 | -7068 | 7.12E-05 | 214 | 0.333333 | 0.003002 | TCF19    |
| 284.7606 | 9.766328 | -7068 | 7.07E-05 | 132 | 0.333333 | 0.001761 | RCCD1    |
| 227.8486 | 8.057743 | -7068 | 7.06E-05 | 129 | 0.333333 | 0.001634 | FAM110C  |
| 2687.392 | 14.46438 | -7068 | 7.10E-05 | 219 | 0.25     | 0.002616 | UGT1A6   |
| 324.7585 | 10.42135 | -7068 | 7.05E-05 | 130 | 0.333333 | 0.001783 | TMEM181  |
| 54.83711 | 12.77589 | -7068 | 6.86E-05 | 44  | 0.25     | 5.36E-04 | FAM161B  |
| 973.9043 | 15.13166 | -7068 | 7.10E-05 | 159 | 0.333333 | 0.001625 | SMIM1    |
| 683.3066 | 5.324706 | -7068 | 7.17E-05 | 303 | 0.333333 | 0.004251 | MND1     |
| 442.6414 | 6.640248 | -7068 | 7.09E-05 | 190 | 0.333333 | 0.002862 | MZT1     |
| 756.2685 | 6.778485 | -7068 | 7.15E-05 | 274 | 0.25     | 0.00399  | C11orf96 |
| 471.9493 | 10.21883 | -7068 | 7.07E-05 | 164 | 0.25     | 0.002032 | CCDC107  |
| 1405.321 | 11.40474 | -7068 | 7.10E-05 | 203 | 0.333333 | 0.00127  | ZNF90    |
| 284.21   | 22.17739 | -7068 | 6.83E-05 | 54  | 0.25     | 4.71E-04 | FAM209B  |
| 113.9625 | 6.975899 | -7068 | 7.00E-05 | 99  | 0.333333 | 0.001261 | PLXNA4   |
| 722.3755 | 11.34684 | -7068 | 7.13E-05 | 180 | 0.333333 | 0.002145 | PLIN4    |
| 464.6983 | 11.45365 | -7068 | 7.05E-05 | 133 | 0.333333 | 0.001415 | SNAI3    |
| 821.2671 | 11.80028 | -7068 | 7.10E-05 | 174 | 0.333333 | 0.00186  | ZNF296   |

|          |          |       |          |     |          |          |          |
|----------|----------|-------|----------|-----|----------|----------|----------|
| 100.4235 | 14.10173 | -7068 | 6.80E-05 | 47  | 0.25     | 4.56E-04 | ATP6AP1L |
| 170.176  | 14.27792 | -7068 | 6.98E-05 | 67  | 0.333333 | 7.20E-04 | COX19    |
| 237.6734 | 8.589642 | -7068 | 7.04E-05 | 133 | 0.25     | 0.001951 | ITPRIPL2 |
| 825.3158 | 9.346071 | -7068 | 7.13E-05 | 205 | 0.25     | 0.002824 | TWIST2   |
| 146.9101 | 14.14591 | -7068 | 6.82E-05 | 59  | 0.333333 | 5.53E-04 | RHOXF1   |
| 506.0456 | 11.60181 | -7068 | 7.09E-05 | 147 | 0.25     | 0.001883 | PPP3R2   |
| 281.7295 | 16.74718 | -7068 | 6.92E-05 | 70  | 0.333333 | 6.15E-04 | C17orf64 |
| 1007.488 | 8.925264 | -7068 | 7.15E-05 | 255 | 0.25     | 0.00348  | ZNF469   |
| 401.5761 | 8.711648 | -7068 | 7.10E-05 | 164 | 0.333333 | 0.002357 | SBK2     |
| 92.65055 | 10.26048 | -7068 | 6.99E-05 | 60  | 0.25     | 6.29E-04 | TSPAN10  |
| 491.21   | 8.840668 | -7068 | 7.08E-05 | 177 | 0.333333 | 0.002222 | MCEMP1   |
| 292.7217 | 8.015656 | -7068 | 7.10E-05 | 164 | 0.333333 | 0.002692 | LRRC8C   |
| 446.5704 | 6.477673 | -7068 | 7.12E-05 | 212 | 0.333333 | 0.002715 | A1BG     |
| 364.276  | 5.455511 | -7068 | 7.12E-05 | 211 | 0.333333 | 0.002538 | SAA2     |
| 711.4025 | 8.219525 | -7068 | 7.13E-05 | 232 | 0.25     | 0.002992 | LRG1     |
| 129.7815 | 16.76875 | -7068 | 6.85E-05 | 50  | 0.333333 | 5.09E-04 | B4GALNT4 |
| 371.964  | 11.51331 | -7068 | 7.09E-05 | 134 | 0.333333 | 0.001754 | KIF7     |
| 510.0533 | 15.3819  | -7068 | 7.06E-05 | 117 | 0.25     | 0.001297 | CATSPER1 |
| 160.6487 | 12.68286 | -7068 | 6.97E-05 | 79  | 0.333333 | 8.96E-04 | DERL3    |
| 524.7189 | 10.44818 | -7068 | 7.10E-05 | 168 | 0.333333 | 0.002068 | CCL28    |
| 223.9924 | 9.360432 | -7068 | 7.02E-05 | 106 | 0.25     | 0.001468 | AHRR     |
| 219.4566 | 12.62915 | -7068 | 7.00E-05 | 88  | 0.333333 | 9.80E-04 | ZP1      |
| 803.375  | 16.05318 | -7068 | 7.04E-05 | 131 | 0.333333 | 0.001086 | ZNF114   |
| 811.8271 | 16.40956 | -7068 | 7.05E-05 | 122 | 0.25     | 0.001298 | ANKRD30B |
| 394.1559 | 18.31966 | -7068 | 7.07E-05 | 91  | 0.333333 | 0.001007 | PLD6     |
| 1377.48  | 27.35362 | -7068 | 6.99E-05 | 78  | 0.333333 | 5.60E-04 | OR7G3    |
| 937.0885 | 20.461   | -7068 | 6.65E-05 | 73  | 0.333333 | 3.65E-04 | OR1L3    |
| 387.2804 | 8.68048  | -7068 | 7.10E-05 | 167 | 0.333333 | 0.002591 | GPX8     |
| 160.9029 | 7.803868 | -7068 | 7.00E-05 | 108 | 0.333333 | 0.00144  | ALG11    |
| 1746.605 | 31.89624 | -7068 | 6.88E-05 | 85  | 0.333333 | 6.48E-04 | OR4K1    |
| 98.59585 | 6.857726 | -7068 | 6.95E-05 | 89  | 0.25     | 0.00103  | SFTA2    |
| 183.596  | 12.01698 | -7068 | 6.96E-05 | 82  | 0.25     | 9.54E-04 | SFTA3    |
| 185.1818 | 16.87445 | -7068 | 6.89E-05 | 60  | 0.25     | 5.91E-04 | GPX6     |
| 96.93267 | 10.86593 | -7068 | 6.66E-05 | 52  | 0.25     | 4.39E-04 | NPSR1    |
| 226.4395 | 9.87587  | -7068 | 7.04E-05 | 115 | 0.25     | 0.001605 | SAMD5    |
| 319.389  | 6.985704 | -7068 | 7.09E-05 | 177 | 0.333333 | 0.002668 | PRDM6    |
| 60.58086 | 12.06913 | -7068 | 6.88E-05 | 50  | 0.25     | 6.38E-04 | TDRP     |
| 318.3011 | 16.93749 | -7068 | 7.05E-05 | 90  | 0.333333 | 0.001085 | NLRP7    |
| 54.81232 | 7.205307 | -7068 | 6.94E-05 | 68  | 0.25     | 9.90E-04 | C3orf80  |
| 480.8115 | 11.6587  | -7068 | 7.07E-05 | 138 | 0.333333 | 0.002044 | GXYLT2   |
| 102.1591 | 10.62698 | -7068 | 7.01E-05 | 78  | 0.25     | 0.001136 | FAM84B   |

|          |          |       |          |      |          |          |           |
|----------|----------|-------|----------|------|----------|----------|-----------|
| 113.2269 | 9.379545 | -7068 | 7.02E-05 | 87   | 0.333333 | 0.00123  | SYDE2     |
| 19.45059 | 17.01489 | -7068 | 6.48E-05 | 24   | 0.25     | 2.59E-04 | VMAC      |
| 392.2094 | 5.073373 | -7068 | 6.95E-05 | 148  | 0.333333 | 6.23E-04 | ZNF554    |
| 4.592059 | 7.514126 | -7068 | 6.40E-05 | 9    | 0.25     | 1.45E-04 | GOLGA6L10 |
| 74.87883 | 6.252512 | -7068 | 6.49E-05 | 37   | 0.25     | 3.53E-04 | GOLGA6L9  |
| 10609.2  | 5.87825  | -7068 | 7.58E-05 | 1172 | 0.333333 | 0.014432 | RPS23     |
| 26004.11 | 7.120217 | -7068 | 7.90E-05 | 1648 | 0.333333 | 0.023609 | CDH3      |
| 8281.717 | 6.464636 | -7068 | 7.51E-05 | 977  | 0.333333 | 0.013017 | HLA-DMB   |
| 6985.8   | 6.674182 | -7068 | 7.47E-05 | 887  | 0.333333 | 0.011464 | ALAS1     |
| 20813.57 | 6.364802 | -7068 | 7.87E-05 | 1625 | 0.333333 | 0.023429 | GOT2      |
| 18743.72 | 5.638628 | -7068 | 7.84E-05 | 1646 | 0.333333 | 0.022532 | SNW1      |
| 15326.45 | 7.076996 | -7068 | 7.69E-05 | 1269 | 0.333333 | 0.017707 | COL17A1   |
| 8784.651 | 6.219603 | -7068 | 7.51E-05 | 1023 | 0.333333 | 0.012636 | RPL27     |
| 7901.54  | 5.388437 | -7068 | 7.56E-05 | 1066 | 0.333333 | 0.014335 | C1QBP     |
| 19767.03 | 6.309147 | -7068 | 7.81E-05 | 1551 | 0.333333 | 0.0203   | PSMD2     |
| 12881.79 | 6.337211 | -7068 | 7.69E-05 | 1283 | 0.333333 | 0.018971 | CD9       |
| 14718.83 | 6.549157 | -7068 | 7.64E-05 | 1279 | 0.333333 | 0.016118 | RPL11     |
| 4182.538 | 5.274979 | -7068 | 7.42E-05 | 807  | 0.333333 | 0.01145  | CYR61     |
| 10091.72 | 6.029288 | -7068 | 7.54E-05 | 1114 | 0.333333 | 0.013378 | RPS16     |
| 9785.162 | 6.701306 | -7068 | 7.57E-05 | 1066 | 0.333333 | 0.015063 | PPIB      |
| 9944.653 | 6.466542 | -7068 | 7.58E-05 | 1080 | 0.333333 | 0.01489  | GBP2      |
| 14523.16 | 5.887521 | -7068 | 7.65E-05 | 1350 | 0.333333 | 0.016356 | RPS5      |
| 20029.73 | 6.005674 | -7068 | 7.87E-05 | 1635 | 0.333333 | 0.022602 | CCT7      |
| 23094.42 | 6.691056 | -7068 | 7.85E-05 | 1617 | 0.333333 | 0.022683 | ADSL      |
| 19102.6  | 5.846409 | -7068 | 7.79E-05 | 1589 | 0.333333 | 0.019961 | FBL       |
| 522169.9 | 9.843176 | -7068 | 1.06E-04 | 5253 | 0.333333 | 0.063788 | UBC       |
| 72974.44 | 7.665748 | -7068 | 8.35E-05 | 2564 | 0.333333 | 0.033334 | APP       |
| 29616.14 | 8.258898 | -7068 | 7.90E-05 | 1624 | 0.333333 | 0.022876 | NTRK1     |
| 31961.64 | 5.124484 | -7068 | 8.06E-05 | 2220 | 0.333333 | 0.027587 | XPO1      |
| 24455.46 | 6.037019 | -7068 | 7.85E-05 | 1750 | 0.333333 | 0.021506 | MCM2      |
| 22974.88 | 6.431118 | -7068 | 7.91E-05 | 1693 | 0.333333 | 0.024359 | VCAM1     |
| 16459.78 | 6.8856   | -7068 | 7.69E-05 | 1322 | 0.333333 | 0.018135 | CUL3      |
| 33208.44 | 5.405169 | -7068 | 8.09E-05 | 2249 | 0.333333 | 0.028979 | EGFR      |
| 21323.84 | 5.41242  | -7068 | 7.87E-05 | 1786 | 0.333333 | 0.023241 | SUMO1     |
| 23524.7  | 6.654551 | -7068 | 7.77E-05 | 1488 | 0.333333 | 0.019617 | COP55     |
| 7840.669 | 7.100063 | -7068 | 7.49E-05 | 909  | 0.333333 | 0.013004 | CLK1      |
| 45121.97 | 5.645794 | -7068 | 8.31E-05 | 2564 | 0.333333 | 0.03441  | FN1       |
| 25816.89 | 5.674051 | -7068 | 8.00E-05 | 1930 | 0.333333 | 0.02744  | EPS15     |
| 19968.61 | 6.214179 | -7068 | 7.80E-05 | 1597 | 0.333333 | 0.021349 | MYC       |
| 9039.161 | 6.601771 | -7068 | 7.57E-05 | 1039 | 0.333333 | 0.015394 | CUL5      |
| 24130.45 | 6.015461 | -7068 | 7.93E-05 | 1790 | 0.333333 | 0.024281 | RPA3      |

|          |          |       |          |      |          |          |        |
|----------|----------|-------|----------|------|----------|----------|--------|
| 10876.28 | 7.058381 | -7068 | 7.59E-05 | 1107 | 0.333333 | 0.015707 | ITGA4  |
| 13319.89 | 6.122345 | -7068 | 7.71E-05 | 1332 | 0.333333 | 0.019512 | FBXW11 |
| 9288.233 | 6.183067 | -7068 | 7.57E-05 | 1074 | 0.333333 | 0.01431  | NEDD8  |
| 12893.68 | 6.002411 | -7068 | 7.68E-05 | 1320 | 0.333333 | 0.018496 | CUL1   |
| 12495.58 | 5.78676  | -7068 | 7.66E-05 | 1308 | 0.333333 | 0.017236 | RPA2   |
| 40591.37 | 6.861624 | -7068 | 8.14E-05 | 2061 | 0.333333 | 0.030638 | CAND1  |
| 12803.09 | 7.096923 | -7068 | 7.60E-05 | 1146 | 0.333333 | 0.014699 | RPL32  |
| 11907.08 | 7.932622 | -7068 | 7.56E-05 | 1013 | 0.333333 | 0.012928 | IRF3   |
| 12226.46 | 8.761892 | -7068 | 7.53E-05 | 963  | 0.333333 | 0.013323 | TSC1   |
| 27698.75 | 6.946086 | -7068 | 7.84E-05 | 1626 | 0.333333 | 0.023112 | MDM2   |
| 15039.47 | 7.669608 | -7068 | 7.65E-05 | 1219 | 0.333333 | 0.018395 | KRAS   |
| 11462.82 | 7.159816 | -7068 | 7.57E-05 | 1076 | 0.333333 | 0.014233 | RPL37  |
| 9462.703 | 6.334901 | -7068 | 7.54E-05 | 1060 | 0.333333 | 0.013211 | EEF2   |
| 7980.843 | 7.066097 | -7068 | 7.45E-05 | 888  | 0.333333 | 0.011064 | DLG4   |
| 12268.03 | 5.38332  | -7068 | 7.70E-05 | 1369 | 0.333333 | 0.018993 | HDAC2  |
| 19019.18 | 6.970971 | -7068 | 7.77E-05 | 1413 | 0.333333 | 0.020117 | CTR9   |
| 8520.746 | 6.775558 | -7068 | 7.49E-05 | 950  | 0.333333 | 0.011516 | RPL19  |
| 10473.95 | 8.223945 | -7068 | 7.54E-05 | 944  | 0.333333 | 0.012668 | BCAP31 |
| 18446.22 | 8.128996 | -7068 | 7.73E-05 | 1282 | 0.333333 | 0.018436 | GBF1   |
| 9607.088 | 4.999587 | -7068 | 7.60E-05 | 1243 | 0.333333 | 0.01585  | FUS    |
| 21827.55 | 7.679697 | -7068 | 7.80E-05 | 1450 | 0.333333 | 0.020708 | IREB2  |
| 24174.74 | 5.846031 | -7068 | 7.95E-05 | 1825 | 0.333333 | 0.025704 | MAP3K7 |
| 11294.69 | 6.525479 | -7068 | 7.63E-05 | 1164 | 0.333333 | 0.016663 | TSG101 |
| 19037.97 | 7.302758 | -7068 | 7.76E-05 | 1399 | 0.333333 | 0.019809 | HTT    |
| 10312.08 | 6.698106 | -7068 | 7.55E-05 | 1059 | 0.333333 | 0.013284 | IL2RG  |
| 11966.26 | 4.82698  | -7068 | 7.65E-05 | 1430 | 0.333333 | 0.017313 | CDK2   |
| 8242.385 | 7.09005  | -7068 | 7.50E-05 | 911  | 0.333333 | 0.012135 | ERCC3  |
| 22477.7  | 6.43538  | -7068 | 7.84E-05 | 1637 | 0.333333 | 0.022198 | ABL1   |
| 5336.794 | 5.980389 | -7068 | 7.42E-05 | 812  | 0.333333 | 0.010198 | CD3D   |
| 13057.92 | 5.703088 | -7068 | 7.65E-05 | 1328 | 0.333333 | 0.016123 | AKT1   |
| 7734.851 | 7.205895 | -7068 | 7.51E-05 | 909  | 0.333333 | 0.013466 | MAML1  |
| 13437.11 | 6.832775 | -7068 | 7.69E-05 | 1241 | 0.333333 | 0.018976 | UBE4A  |
| 12999.83 | 8.037562 | -7068 | 7.58E-05 | 1057 | 0.333333 | 0.014366 | CLK2   |
| 24950.03 | 6.446833 | -7068 | 7.94E-05 | 1746 | 0.333333 | 0.025269 | ACVR1  |
| 24931.02 | 5.894108 | -7068 | 7.96E-05 | 1858 | 0.333333 | 0.026265 | PPP2CA |
| 25922.17 | 5.43507  | -7068 | 8.03E-05 | 1987 | 0.333333 | 0.027938 | POLR2B |
| 9022.793 | 5.617325 | -7068 | 7.58E-05 | 1132 | 0.333333 | 0.01501  | APEX1  |
| 12301.81 | 7.050479 | -7068 | 7.62E-05 | 1148 | 0.333333 | 0.016389 | PAXIP1 |
| 20631.64 | 6.938218 | -7068 | 7.83E-05 | 1521 | 0.333333 | 0.022193 | ZHX2   |
| 19302    | 5.878762 | -7068 | 7.78E-05 | 1615 | 0.333333 | 0.020335 | ESR1   |
| 19578.74 | 5.993888 | -7068 | 7.84E-05 | 1618 | 0.333333 | 0.022802 | FLI1   |



|          |          |       |          |      |          |          |           |
|----------|----------|-------|----------|------|----------|----------|-----------|
| 13405.18 | 5.286549 | -7068 | 7.73E-05 | 1473 | 0.333333 | 0.020485 | YWHAZ     |
| 28613.65 | 6.820889 | -7068 | 7.97E-05 | 1786 | 0.333333 | 0.024391 | TRIM28    |
| 10251.62 | 7.253044 | -7068 | 7.52E-05 | 980  | 0.333333 | 0.012751 | CD27      |
| 26566.51 | 6.389029 | -7068 | 7.99E-05 | 1822 | 0.333333 | 0.027028 | ATXN1     |
| 10366.74 | 5.001129 | -7068 | 7.61E-05 | 1296 | 0.333333 | 0.01636  | RPA1      |
| 20369.98 | 9.453199 | -7068 | 7.65E-05 | 1159 | 0.333333 | 0.014932 | MAP3K10   |
| 20447.03 | 5.113505 | -7068 | 7.88E-05 | 1814 | 0.333333 | 0.023942 | FYN       |
| 31375.54 | 16.02092 | -7068 | 7.63E-05 | 1159 | 0.333333 | 0.016186 | GNB1      |
| 20602.45 | 6.599772 | -7068 | 7.85E-05 | 1576 | 0.333333 | 0.022667 | IRF2      |
| 17959.54 | 5.588634 | -7068 | 7.80E-05 | 1611 | 0.333333 | 0.021418 | BARD1     |
| 14231.72 | 6.294678 | -7068 | 7.71E-05 | 1335 | 0.333333 | 0.019211 | BIRC2     |
| 14845.76 | 5.104033 | -7068 | 7.73E-05 | 1505 | 0.333333 | 0.019267 | DHX15     |
| 9986.275 | 5.731355 | -7068 | 7.56E-05 | 1148 | 0.333333 | 0.013647 | RPLP0     |
| 14041.59 | 5.938833 | -7068 | 7.73E-05 | 1404 | 0.333333 | 0.020033 | KIT       |
| 12815.83 | 6.040166 | -7068 | 7.68E-05 | 1296 | 0.333333 | 0.018055 | CHUK      |
| 16596.4  | 6.113044 | -7068 | 7.77E-05 | 1473 | 0.333333 | 0.020651 | VCP       |
| 10483.04 | 7.035287 | -7068 | 7.59E-05 | 1045 | 0.333333 | 0.015288 | EMC2      |
| 8766.156 | 7.647565 | -7068 | 7.52E-05 | 918  | 0.333333 | 0.013324 | OPRK1     |
| 11030.44 | 5.928781 | -7068 | 7.64E-05 | 1225 | 0.333333 | 0.017472 | PIK3CA    |
| 13257.56 | 7.257303 | -7068 | 7.65E-05 | 1191 | 0.333333 | 0.017314 | PFKM      |
| 6724.93  | 5.655387 | -7068 | 7.52E-05 | 990  | 0.333333 | 0.014431 | DARS      |
| 8087.121 | 7.210419 | -7068 | 7.49E-05 | 899  | 0.333333 | 0.011612 | MAP4K1    |
| 10421.24 | 6.558682 | -7068 | 7.59E-05 | 1118 | 0.333333 | 0.01532  | DDB1      |
| 7308.775 | 5.711372 | -7068 | 7.52E-05 | 1018 | 0.333333 | 0.01404  | EED       |
| 18609.7  | 5.762072 | -7068 | 7.82E-05 | 1599 | 0.333333 | 0.021844 | CD53      |
| 7543.614 | 4.541415 | -7068 | 7.52E-05 | 1142 | 0.333333 | 0.013272 | HNRNPA1   |
| 6129.333 | 5.409369 | -7068 | 7.50E-05 | 957  | 0.333333 | 0.013365 | SUZ12     |
| 20395.87 | 5.41731  | -7068 | 7.81E-05 | 1724 | 0.333333 | 0.021143 | HDAC1     |
| 10486.93 | 7.420651 | -7068 | 7.55E-05 | 1010 | 0.333333 | 0.013699 | RAB5B     |
| 7323.586 | 6.794778 | -7068 | 7.46E-05 | 886  | 0.333333 | 0.011092 | RPS17     |
| 11067.73 | 7.035219 | -7068 | 7.59E-05 | 1071 | 0.333333 | 0.01423  | CDC37     |
| 9329.996 | 7.103743 | -7068 | 7.53E-05 | 991  | 0.333333 | 0.013055 | HDAC3     |
| 13800.16 | 5.934856 | -7068 | 7.72E-05 | 1360 | 0.333333 | 0.018579 | PRMT1     |
| 7959.401 | 7.108143 | -7068 | 7.51E-05 | 925  | 0.333333 | 0.012988 | HDAC5     |
| 7198.523 | 7.35995  | -7068 | 7.46E-05 | 834  | 0.333333 | 0.010869 | DGKA      |
| 7588.648 | 5.424892 | -7068 | 7.51E-05 | 1043 | 0.333333 | 0.01318  | RPL6      |
| 9135.76  | 5.951541 | -7068 | 7.56E-05 | 1070 | 0.333333 | 0.013829 | EIF3B     |
| 17077.94 | 5.283417 | -7068 | 7.80E-05 | 1625 | 0.333333 | 0.021546 | HNRNPA2B1 |
| 25445.68 | 5.652628 | -7068 | 7.99E-05 | 1912 | 0.333333 | 0.026366 | PPP1CC    |
| 11768.88 | 8.544456 | -7068 | 7.53E-05 | 948  | 0.333333 | 0.011891 | GDI1      |
| 8064.644 | 7.71963  | -7068 | 7.50E-05 | 869  | 0.333333 | 0.012903 | RNF139    |

|          |          |       |          |      |          |          |          |
|----------|----------|-------|----------|------|----------|----------|----------|
| 10666.66 | 6.752594 | -7068 | 7.58E-05 | 1086 | 0.333333 | 0.014278 | EIF3I    |
| 4352.307 | 5.652093 | -7068 | 7.37E-05 | 758  | 0.333333 | 0.00886  | RPS15    |
| 22765.99 | 6.466839 | -7068 | 7.88E-05 | 1652 | 0.333333 | 0.023465 | CPE      |
| 12963.73 | 6.253702 | -7068 | 7.69E-05 | 1306 | 0.333333 | 0.019197 | SMURF2   |
| 31727.48 | 5.273587 | -7068 | 8.08E-05 | 2213 | 0.333333 | 0.02906  | CTNNB1   |
| 29764.58 | 6.369688 | -7068 | 8.03E-05 | 1930 | 0.333333 | 0.026824 | CLIC1    |
| 35579.22 | 5.983953 | -7068 | 8.16E-05 | 2180 | 0.333333 | 0.031096 | PPP3CA   |
| 18155.57 | 5.627967 | -7068 | 7.80E-05 | 1588 | 0.333333 | 0.020058 | CDK4     |
| 7383.537 | 6.773933 | -7068 | 7.48E-05 | 910  | 0.333333 | 0.012038 | ATF4     |
| 8569.05  | 8.12596  | -7068 | 7.48E-05 | 845  | 0.333333 | 0.011569 | CHGB     |
| 15263.2  | 6.641671 | -7068 | 7.68E-05 | 1324 | 0.333333 | 0.017991 | CSNK2A2  |
| 14091.39 | 7.394052 | -7068 | 7.68E-05 | 1212 | 0.333333 | 0.018064 | CCNG1    |
| 14861.72 | 8.121477 | -7068 | 7.63E-05 | 1098 | 0.333333 | 0.014348 | KRT2     |
| 22598.55 | 6.344585 | -7068 | 7.90E-05 | 1679 | 0.333333 | 0.024137 | CTNND2   |
| 11994    | 6.833411 | -7068 | 7.61E-05 | 1117 | 0.333333 | 0.016308 | DPM1     |
| 11865.07 | 6.907213 | -7068 | 7.66E-05 | 1181 | 0.333333 | 0.017593 | HDGF     |
| 14946.76 | 9.615473 | -7068 | 7.57E-05 | 985  | 0.333333 | 0.012602 | SMO      |
| 7749.825 | 7.140372 | -7068 | 7.48E-05 | 883  | 0.333333 | 0.011498 | APRT     |
| 6750.14  | 9.553082 | -7068 | 7.39E-05 | 660  | 0.333333 | 0.008698 | CPA1     |
| 10836.97 | 6.338629 | -7068 | 7.64E-05 | 1178 | 0.333333 | 0.017508 | DCK      |
| 12898.37 | 5.497713 | -7068 | 7.73E-05 | 1398 | 0.333333 | 0.020085 | NUP153   |
| 18211.08 | 5.602975 | -7068 | 7.80E-05 | 1619 | 0.333333 | 0.021897 | HSP90AA1 |
| 22986.29 | 4.963556 | -7068 | 7.97E-05 | 1994 | 0.333333 | 0.026988 | CSNK2A1  |
| 15328.5  | 6.162701 | -7068 | 7.72E-05 | 1407 | 0.333333 | 0.018902 | CDK7     |
| 12371.77 | 6.9529   | -7068 | 7.64E-05 | 1174 | 0.333333 | 0.017252 | HIVEP1   |
| 10882.21 | 8.893915 | -7068 | 7.51E-05 | 910  | 0.333333 | 0.012442 | KAT2A    |
| 9223.764 | 7.965436 | -7068 | 7.51E-05 | 887  | 0.333333 | 0.011667 | CLPTM1   |
| 8929.874 | 9.055235 | -7068 | 7.46E-05 | 819  | 0.333333 | 0.011975 | LIG4     |
| 8521.247 | 5.976154 | -7068 | 7.53E-05 | 1047 | 0.333333 | 0.013606 | IL2RB    |
| 12543.52 | 6.516486 | -7068 | 7.63E-05 | 1217 | 0.333333 | 0.016526 | KAT2B    |
| 13890.89 | 7.843001 | -7068 | 7.65E-05 | 1137 | 0.333333 | 0.015995 | ASCC2    |
| 14190.08 | 5.481732 | -7068 | 7.77E-05 | 1482 | 0.333333 | 0.021661 | RAD21    |
| 11816.7  | 7.333004 | -7068 | 7.61E-05 | 1114 | 0.333333 | 0.016299 | TERF2    |
| 9531.928 | 7.80879  | -7068 | 7.54E-05 | 948  | 0.333333 | 0.013893 | ZCCHC11  |
| 11083.5  | 6.332976 | -7068 | 7.60E-05 | 1143 | 0.333333 | 0.015224 | SELL     |
| 21976.45 | 6.571417 | -7068 | 7.88E-05 | 1624 | 0.333333 | 0.023208 | ATP5J    |
| 12505.76 | 5.716706 | -7068 | 7.67E-05 | 1338 | 0.333333 | 0.018642 | SMAD2    |
| 13466.11 | 5.565631 | -7068 | 7.73E-05 | 1398 | 0.333333 | 0.019589 | PSMC6    |
| 8837.682 | 8.056987 | -7068 | 7.50E-05 | 884  | 0.333333 | 0.012032 | TBCB     |
| 12575.8  | 5.325897 | -7068 | 7.69E-05 | 1382 | 0.333333 | 0.01841  | MSH2     |
| 6431.286 | 7.13641  | -7068 | 7.48E-05 | 829  | 0.333333 | 0.012724 | FMR1     |

|          |          |       |          |      |          |          |         |
|----------|----------|-------|----------|------|----------|----------|---------|
| 10827.32 | 8.109245 | -7068 | 7.50E-05 | 939  | 0.333333 | 0.012131 | PAX6    |
| 11052.77 | 5.895971 | -7068 | 7.60E-05 | 1207 | 0.333333 | 0.015605 | EEF1A1  |
| 9535.161 | 5.749269 | -7068 | 7.59E-05 | 1160 | 0.333333 | 0.016326 | SMAD4   |
| 5761.675 | 6.841364 | -7068 | 7.47E-05 | 814  | 0.333333 | 0.012458 | TSNAX   |
| 15767.97 | 6.643175 | -7068 | 7.71E-05 | 1327 | 0.333333 | 0.018599 | USP1    |
| 12937.27 | 7.122108 | -7068 | 7.63E-05 | 1153 | 0.333333 | 0.015057 | HRAS    |
| 8857.116 | 5.172697 | -7068 | 7.55E-05 | 1133 | 0.333333 | 0.013346 | SNRPD2  |
| 10369.32 | 6.037675 | -7068 | 7.61E-05 | 1169 | 0.333333 | 0.016489 | ATR     |
| 7313.053 | 7.040525 | -7068 | 7.45E-05 | 870  | 0.333333 | 0.011634 | RPS12   |
| 9756.922 | 7.864916 | -7068 | 7.53E-05 | 953  | 0.333333 | 0.013399 | ALOX12  |
| 13926.84 | 8.458187 | -7068 | 7.61E-05 | 1053 | 0.333333 | 0.01416  | XDH     |
| 11235.51 | 7.169228 | -7068 | 7.59E-05 | 1085 | 0.333333 | 0.015153 | TUBB2A  |
| 8201.075 | 5.641424 | -7068 | 7.54E-05 | 1072 | 0.333333 | 0.014171 | TRAF6   |
| 12513.93 | 5.386178 | -7068 | 7.69E-05 | 1353 | 0.333333 | 0.018229 | DLD     |
| 7465.73  | 6.316338 | -7068 | 7.52E-05 | 959  | 0.333333 | 0.014123 | TOP2B   |
| 15150.96 | 7.593028 | -7068 | 7.66E-05 | 1205 | 0.333333 | 0.016309 | RPS6KA1 |
| 7141.2   | 6.897196 | -7068 | 7.47E-05 | 867  | 0.333333 | 0.012357 | MS4A1   |
| 24711.41 | 6.416134 | -7068 | 7.92E-05 | 1743 | 0.333333 | 0.023765 | ACTN4   |
| 7968.205 | 8.233278 | -7068 | 7.46E-05 | 828  | 0.333333 | 0.011308 | POU2F1  |
| 16017.45 | 6.182462 | -7068 | 7.74E-05 | 1395 | 0.333333 | 0.018511 | NME1    |
| 7701.143 | 6.447565 | -7068 | 7.53E-05 | 959  | 0.333333 | 0.014012 | UBR5    |
| 25954.84 | 7.54595  | -7068 | 7.85E-05 | 1602 | 0.333333 | 0.022579 | SNCA    |
| 6376.161 | 8.566284 | -7068 | 7.41E-05 | 702  | 0.333333 | 0.009415 | MADD    |
| 24450.74 | 7.286175 | -7068 | 7.87E-05 | 1580 | 0.333333 | 0.023081 | BMPRI1B |
| 8648.941 | 6.60394  | -7068 | 7.57E-05 | 1005 | 0.333333 | 0.015455 | MORC3   |
| 5223.51  | 6.328043 | -7068 | 7.45E-05 | 826  | 0.333333 | 0.012447 | CUL4A   |
| 13415.48 | 10.07443 | -7068 | 7.53E-05 | 910  | 0.333333 | 0.012488 | LZTR1   |
| 10094.26 | 6.888044 | -7068 | 7.60E-05 | 1064 | 0.333333 | 0.016339 | ZMYM4   |
| 11050.63 | 6.606335 | -7068 | 7.62E-05 | 1145 | 0.333333 | 0.016656 | MAP3K4  |
| 9534.118 | 7.668241 | -7068 | 7.54E-05 | 954  | 0.333333 | 0.01331  | OS9     |
| 18813.99 | 6.566406 | -7068 | 7.78E-05 | 1462 | 0.333333 | 0.02088  | DEK     |
| 6741.162 | 7.265261 | -7068 | 7.48E-05 | 831  | 0.333333 | 0.012576 | ZDHHC17 |
| 21719.65 | 6.395005 | -7068 | 7.93E-05 | 1675 | 0.333333 | 0.025685 | BZW1    |
| 17037.82 | 6.447475 | -7068 | 7.79E-05 | 1452 | 0.333333 | 0.021534 | ADD3    |
| 24343.44 | 7.183971 | -7068 | 7.88E-05 | 1619 | 0.333333 | 0.023475 | TUBA1A  |
| 14828.46 | 5.901026 | -7068 | 7.75E-05 | 1413 | 0.333333 | 0.020167 | MRPL3   |
| 15003.92 | 6.184305 | -7068 | 7.72E-05 | 1363 | 0.333333 | 0.019052 | DDX21   |
| 10288.52 | 7.581766 | -7068 | 7.55E-05 | 1007 | 0.333333 | 0.013943 | CD81    |
| 38414.18 | 6.839398 | -7068 | 8.16E-05 | 2075 | 0.333333 | 0.030442 | DLG2    |
| 12532.15 | 6.559962 | -7068 | 7.64E-05 | 1216 | 0.333333 | 0.017397 | SP3     |
| 22934.38 | 6.867958 | -7068 | 7.82E-05 | 1558 | 0.333333 | 0.021449 | SH3GL2  |

|          |          |       |          |      |          |          |        |
|----------|----------|-------|----------|------|----------|----------|--------|
| 9989.817 | 7.081027 | -7068 | 7.56E-05 | 1025 | 0.333333 | 0.014709 | THOC1  |
| 7796.568 | 7.885349 | -7068 | 7.47E-05 | 847  | 0.333333 | 0.011992 | XPA    |
| 15262.89 | 6.769567 | -7068 | 7.69E-05 | 1308 | 0.333333 | 0.01804  | RPL34  |
| 15139.12 | 5.51296  | -7068 | 7.69E-05 | 1482 | 0.333333 | 0.01831  | GRB2   |
| 7385.375 | 7.678553 | -7068 | 7.49E-05 | 852  | 0.333333 | 0.012642 | CAMLG  |
| 4594.301 | 7.358426 | -7068 | 7.38E-05 | 680  | 0.333333 | 0.009898 | PMS1   |
| 11542.85 | 6.754887 | -7068 | 7.63E-05 | 1160 | 0.333333 | 0.01725  | PCF11  |
| 10288.85 | 6.41176  | -7068 | 7.62E-05 | 1122 | 0.333333 | 0.017002 | RB1CC1 |
| 20310.63 | 6.870658 | -7068 | 7.84E-05 | 1511 | 0.333333 | 0.022781 | STAM   |
| 32048.15 | 6.002176 | -7068 | 8.08E-05 | 2085 | 0.333333 | 0.028859 | HNRNPD |
| 13629.13 | 6.238042 | -7068 | 7.67E-05 | 1307 | 0.333333 | 0.017478 | ILK    |
| 15637.56 | 6.15841  | -7068 | 7.74E-05 | 1413 | 0.333333 | 0.02015  | RBM39  |
| 24951.62 | 6.710666 | -7068 | 7.92E-05 | 1700 | 0.333333 | 0.024415 | LSM6   |
| 21008.86 | 5.831625 | -7068 | 7.83E-05 | 1645 | 0.333333 | 0.021362 | CDC20  |
| 10125.03 | 6.351873 | -7068 | 7.60E-05 | 1118 | 0.333333 | 0.015693 | IL4R   |
| 18742.22 | 5.268632 | -7068 | 7.81E-05 | 1665 | 0.333333 | 0.021317 | PSMD14 |
| 5908.304 | 8.67017  | -7068 | 7.40E-05 | 685  | 0.333333 | 0.010014 | ATXN2  |
| 5519.374 | 6.902491 | -7068 | 7.40E-05 | 754  | 0.333333 | 0.009322 | CD3G   |
| 12158.42 | 5.746429 | -7068 | 7.68E-05 | 1311 | 0.333333 | 0.018387 | SSB    |
| 7817.196 | 7.763565 | -7068 | 7.50E-05 | 855  | 0.333333 | 0.012042 | EDC4   |
| 10710.25 | 8.50387  | -7068 | 7.54E-05 | 913  | 0.333333 | 0.012155 | SCAP   |
| 12093.45 | 5.385379 | -7068 | 7.64E-05 | 1321 | 0.333333 | 0.01637  | FLNA   |
| 8007.942 | 7.332769 | -7068 | 7.51E-05 | 920  | 0.333333 | 0.013432 | NVL    |
| 23318.7  | 7.68672  | -7068 | 7.84E-05 | 1499 | 0.333333 | 0.021716 | PTPRU  |
| 4208.725 | 8.235913 | -7068 | 7.36E-05 | 601  | 0.333333 | 0.008801 | SPG11  |
| 8515.873 | 6.821102 | -7068 | 7.54E-05 | 993  | 0.333333 | 0.014783 | PRKACB |
| 8995.422 | 6.125499 | -7068 | 7.56E-05 | 1067 | 0.333333 | 0.01525  | CDK8   |
| 14186.08 | 7.808505 | -7068 | 7.63E-05 | 1145 | 0.333333 | 0.015758 | TRIP10 |
| 13173.45 | 8.970264 | -7068 | 7.57E-05 | 1000 | 0.333333 | 0.013498 | MRAS   |
| 9452.837 | 8.532694 | -7068 | 7.50E-05 | 870  | 0.333333 | 0.012335 | KCNJ10 |
| 11510.69 | 5.561146 | -7068 | 7.61E-05 | 1277 | 0.333333 | 0.016106 | BRCA1  |
| 12838.28 | 8.818423 | -7068 | 7.56E-05 | 973  | 0.333333 | 0.012671 | MPP3   |
| 10361.76 | 9.224443 | -7068 | 7.49E-05 | 833  | 0.333333 | 0.010087 | PDE6G  |
| 12822.4  | 5.979658 | -7068 | 7.72E-05 | 1344 | 0.333333 | 0.019746 | GTF2F2 |
| 6375.939 | 8.181088 | -7068 | 7.41E-05 | 718  | 0.333333 | 0.009346 | DHX16  |
| 6248.789 | 7.428798 | -7068 | 7.39E-05 | 740  | 0.333333 | 0.008955 | CD79A  |
| 8570.534 | 7.590176 | -7068 | 7.50E-05 | 886  | 0.333333 | 0.011743 | SART1  |
| 7456.636 | 8.660652 | -7068 | 7.44E-05 | 759  | 0.333333 | 0.01029  | TSHB   |
| 12031.5  | 7.016917 | -7068 | 7.65E-05 | 1152 | 0.333333 | 0.017338 | MYCBP2 |
| 32573.39 | 5.69542  | -7068 | 8.11E-05 | 2161 | 0.333333 | 0.029566 | SRPK1  |
| 6068.781 | 6.535507 | -7068 | 7.48E-05 | 853  | 0.333333 | 0.012815 | RNF11  |

|          |          |       |          |      |          |          |          |
|----------|----------|-------|----------|------|----------|----------|----------|
| 7236.576 | 7.858402 | -7068 | 7.45E-05 | 801  | 0.333333 | 0.010122 | ACADVL   |
| 9708.806 | 6.460237 | -7068 | 7.59E-05 | 1083 | 0.333333 | 0.016134 | CLASP2   |
| 18762.02 | 6.31314  | -7068 | 7.86E-05 | 1567 | 0.333333 | 0.023927 | LBR      |
| 31593.47 | 21.12715 | -7068 | 7.50E-05 | 928  | 0.333333 | 0.011717 | ARRB2    |
| 10058.94 | 6.701401 | -7068 | 7.58E-05 | 1072 | 0.333333 | 0.014684 | TNFRSF1B |
| 9222.323 | 7.658299 | -7068 | 7.51E-05 | 913  | 0.333333 | 0.012012 | BAG6     |
| 7447.505 | 7.073704 | -7068 | 7.50E-05 | 902  | 0.333333 | 0.012613 | GYS1     |
| 15872.33 | 7.526193 | -7068 | 7.63E-05 | 1182 | 0.333333 | 0.015215 | TUBG1    |
| 12737.3  | 6.715794 | -7068 | 7.62E-05 | 1179 | 0.333333 | 0.015187 | IRAK1    |
| 12580.65 | 6.1756   | -7068 | 7.69E-05 | 1268 | 0.333333 | 0.019332 | SMNDC1   |
| 12609.92 | 8.406627 | -7068 | 7.56E-05 | 1014 | 0.333333 | 0.013537 | ACIN1    |
| 17426.82 | 6.285387 | -7068 | 7.80E-05 | 1485 | 0.333333 | 0.021723 | CDC123   |
| 8959.424 | 5.005997 | -7068 | 7.58E-05 | 1191 | 0.333333 | 0.014783 | MCM5     |
| 13602.45 | 7.756236 | -7068 | 7.62E-05 | 1122 | 0.333333 | 0.015519 | ENO2     |
| 7651.799 | 6.222627 | -7068 | 7.53E-05 | 994  | 0.333333 | 0.014471 | CDKN1B   |
| 14772.03 | 7.505517 | -7068 | 7.65E-05 | 1204 | 0.333333 | 0.016714 | FOXA1    |
| 11164.2  | 7.146995 | -7068 | 7.57E-05 | 1055 | 0.333333 | 0.013504 | ARAF     |
| 6820.018 | 5.840057 | -7068 | 7.51E-05 | 980  | 0.333333 | 0.013976 | CREB1    |
| 16896.26 | 6.488819 | -7068 | 7.76E-05 | 1414 | 0.333333 | 0.019561 | CD34     |
| 10797.5  | 6.161852 | -7068 | 7.61E-05 | 1173 | 0.333333 | 0.016129 | IRF8     |
| 12777.8  | 6.744803 | -7068 | 7.65E-05 | 1209 | 0.333333 | 0.017109 | SPTAN1   |
| 5845.151 | 9.464719 | -7068 | 7.38E-05 | 639  | 0.333333 | 0.008215 | SH2B2    |
| 13279.14 | 7.448223 | -7068 | 7.63E-05 | 1142 | 0.25     | 0.016614 | TSPAN7   |
| 10526.53 | 9.999657 | -7068 | 7.45E-05 | 772  | 0.333333 | 0.009407 | WNT1     |
| 5690.721 | 8.493031 | -7068 | 7.38E-05 | 668  | 0.333333 | 0.008723 | SST      |
| 16130.72 | 8.152762 | -7068 | 7.69E-05 | 1204 | 0.333333 | 0.018196 | SCRN1    |
| 15952.01 | 8.706747 | -7068 | 7.58E-05 | 1045 | 0.333333 | 0.013049 | HGS      |
| 5401.566 | 7.113258 | -7068 | 7.38E-05 | 718  | 0.333333 | 0.008919 | MYL2     |
| 12134.93 | 5.83841  | -7068 | 7.67E-05 | 1312 | 0.333333 | 0.018349 | YWHAE    |
| 18533.45 | 6.51718  | -7068 | 7.84E-05 | 1524 | 0.333333 | 0.022988 | SLC16A1  |
| 11805.82 | 6.491719 | -7068 | 7.62E-05 | 1174 | 0.333333 | 0.015068 | CSNK2B   |
| 8689.214 | 5.97441  | -7068 | 7.53E-05 | 1042 | 0.333333 | 0.013029 | ARHGDIB  |
| 11045.45 | 6.911245 | -7068 | 7.60E-05 | 1094 | 0.333333 | 0.014743 | UBA1     |
| 10778.65 | 7.223263 | -7068 | 7.57E-05 | 1027 | 0.333333 | 0.013579 | ATP4A    |
| 9358.516 | 5.541349 | -7068 | 7.60E-05 | 1180 | 0.333333 | 0.016472 | GSK3B    |
| 14318.96 | 7.099314 | -7068 | 7.70E-05 | 1258 | 0.333333 | 0.018986 | SOX2     |
| 8475.397 | 8.771885 | -7068 | 7.46E-05 | 801  | 0.333333 | 0.010469 | RING1    |
| 4397.435 | 7.839547 | -7068 | 7.37E-05 | 647  | 0.333333 | 0.009433 | TERF1    |
| 5991.547 | 7.275561 | -7068 | 7.45E-05 | 781  | 0.333333 | 0.011043 | BAP1     |
| 3375.925 | 7.385447 | -7068 | 7.34E-05 | 577  | 0.333333 | 0.008891 | PNISR    |
| 7646.281 | 7.100963 | -7068 | 7.52E-05 | 914  | 0.333333 | 0.013853 | CSRNP2   |

|          |          |       |          |      |          |          |          |
|----------|----------|-------|----------|------|----------|----------|----------|
| 13075.34 | 5.634452 | -7068 | 7.70E-05 | 1373 | 0.333333 | 0.019216 | MAP3K5   |
| 19428.32 | 7.612376 | -7068 | 7.75E-05 | 1373 | 0.333333 | 0.019254 | GSK3A    |
| 6223.365 | 6.530826 | -7068 | 7.45E-05 | 847  | 0.333333 | 0.011653 | MDC1     |
| 14995.02 | 4.77875  | -7068 | 7.68E-05 | 1578 | 0.333333 | 0.017628 | TP53     |
| 10211.05 | 7.99269  | -7068 | 7.55E-05 | 967  | 0.333333 | 0.014386 | CPOX     |
| 7086.796 | 6.279378 | -7068 | 7.51E-05 | 941  | 0.333333 | 0.013788 | ATF1     |
| 8490.634 | 7.287381 | -7068 | 7.49E-05 | 890  | 0.333333 | 0.01144  | CORO1A   |
| 6756.239 | 6.036111 | -7068 | 7.48E-05 | 920  | 0.333333 | 0.011921 | ITGAL    |
| 8025.531 | 11.42063 | -7068 | 7.36E-05 | 603  | 0.333333 | 0.007107 | CLPS     |
| 6889.171 | 8.601121 | -7068 | 7.41E-05 | 723  | 0.333333 | 0.009257 | CSRP3    |
| 4348.181 | 6.882508 | -7068 | 7.38E-05 | 697  | 0.333333 | 0.009654 | BMX      |
| 19125.36 | 6.545151 | -7068 | 7.82E-05 | 1530 | 0.333333 | 0.022339 | MAPK7    |
| 14925.99 | 6.542997 | -7068 | 7.72E-05 | 1338 | 0.333333 | 0.019575 | ATM      |
| 9784.033 | 5.87047  | -7068 | 7.63E-05 | 1188 | 0.333333 | 0.017609 | YWHAQ    |
| 15592.13 | 7.615888 | -7068 | 7.65E-05 | 1217 | 0.333333 | 0.016474 | PRKCZ    |
| 14872.08 | 6.147563 | -7068 | 7.66E-05 | 1302 | 0.333333 | 0.015996 | SLC2A2   |
| 7378.845 | 7.940991 | -7068 | 7.45E-05 | 807  | 0.333333 | 0.011348 | DCX      |
| 14663.37 | 6.165283 | -7068 | 7.71E-05 | 1356 | 0.333333 | 0.018576 | HLA-DRA  |
| 12159.09 | 7.317232 | -7068 | 7.60E-05 | 1095 | 0.333333 | 0.01545  | CDH17    |
| 7827.765 | 6.299324 | -7068 | 7.46E-05 | 922  | 0.333333 | 0.010879 | PTPN6    |
| 9094.928 | 7.83788  | -7068 | 7.54E-05 | 942  | 0.333333 | 0.013978 | CHD2     |
| 8838.529 | 6.042107 | -7068 | 7.54E-05 | 1042 | 0.333333 | 0.0136   | IL10RA   |
| 8005.547 | 6.194927 | -7068 | 7.47E-05 | 961  | 0.333333 | 0.01119  | RPS19    |
| 6663.761 | 6.832591 | -7068 | 7.49E-05 | 845  | 0.333333 | 0.011497 | CLPP     |
| 12462.98 | 8.422921 | -7068 | 7.56E-05 | 1026 | 0.333333 | 0.014099 | CDK9     |
| 7090.582 | 8.380783 | -7068 | 7.46E-05 | 781  | 0.333333 | 0.011509 | IQCB1    |
| 9625.691 | 7.049087 | -7068 | 7.58E-05 | 1040 | 0.333333 | 0.014894 | HMGN2    |
| 17964.47 | 6.623527 | -7068 | 7.80E-05 | 1462 | 0.333333 | 0.021791 | GTF2E1   |
| 7808.063 | 6.794456 | -7068 | 7.53E-05 | 949  | 0.333333 | 0.014168 | TBCA     |
| 10670.8  | 9.028444 | -7068 | 7.52E-05 | 882  | 0.333333 | 0.011535 | PLOD3    |
| 20919.84 | 6.774286 | -7068 | 7.81E-05 | 1525 | 0.333333 | 0.021688 | GAP43    |
| 7023.218 | 10.46606 | -7068 | 7.36E-05 | 626  | 0.333333 | 0.00758  | LTA      |
| 8901.787 | 5.868336 | -7068 | 7.54E-05 | 1060 | 0.333333 | 0.013248 | PRPF8    |
| 11988.77 | 7.322079 | -7068 | 7.63E-05 | 1129 | 0.333333 | 0.016759 | COX10    |
| 9798.789 | 7.738484 | -7068 | 7.56E-05 | 974  | 0.333333 | 0.014394 | TOR1B    |
| 13671.02 | 5.912037 | -7068 | 7.70E-05 | 1356 | 0.333333 | 0.018133 | TNFRSF1A |
| 18308.99 | 6.221849 | -7068 | 7.75E-05 | 1493 | 0.333333 | 0.019941 | SRSF11   |
| 11364.14 | 6.856443 | -7068 | 7.61E-05 | 1129 | 0.333333 | 0.016709 | RPS6KA5  |
| 17179.15 | 6.025134 | -7068 | 7.83E-05 | 1556 | 0.333333 | 0.023445 | MAPK6    |
| 12664.99 | 9.46379  | -7068 | 7.54E-05 | 924  | 0.333333 | 0.012065 | IPO13    |
| 13660.44 | 5.715154 | -7068 | 7.72E-05 | 1381 | 0.333333 | 0.019822 | SMC3     |

|          |          |       |          |      |          |          |          |
|----------|----------|-------|----------|------|----------|----------|----------|
| 6057.185 | 7.657147 | -7068 | 7.42E-05 | 747  | 0.333333 | 0.010276 | CCK      |
| 30730.13 | 6.59594  | -7068 | 8.00E-05 | 1894 | 0.333333 | 0.026697 | APC      |
| 8933.839 | 7.526609 | -7068 | 7.51E-05 | 926  | 0.333333 | 0.012974 | SLC4A1   |
| 17966.69 | 5.790383 | -7068 | 7.81E-05 | 1563 | 0.333333 | 0.021509 | NCBP1    |
| 12006.73 | 7.127534 | -7068 | 7.56E-05 | 1083 | 0.333333 | 0.01432  | PLP1     |
| 12801.78 | 7.605657 | -7068 | 7.60E-05 | 1088 | 0.333333 | 0.014721 | FMO4     |
| 10055.28 | 6.149477 | -7068 | 7.61E-05 | 1143 | 0.333333 | 0.016303 | HADHB    |
| 22231.11 | 7.583178 | -7068 | 7.79E-05 | 1455 | 0.333333 | 0.020862 | ISL1     |
| 11801.09 | 8.452974 | -7068 | 7.55E-05 | 976  | 0.333333 | 0.013417 | KRT9     |
| 12220.53 | 8.451643 | -7068 | 7.57E-05 | 1008 | 0.333333 | 0.014046 | TAB1     |
| 9814.191 | 6.100921 | -7068 | 7.63E-05 | 1159 | 0.333333 | 0.01771  | PPP1R12A |
| 28272.71 | 6.88317  | -7068 | 7.99E-05 | 1787 | 0.333333 | 0.026145 | GATA3    |
| 25303.04 | 6.43662  | -7068 | 7.91E-05 | 1748 | 0.333333 | 0.023436 | SOD1     |
| 9894.057 | 6.793839 | -7068 | 7.60E-05 | 1068 | 0.333333 | 0.016545 | ATP2C1   |
| 5633.917 | 6.767028 | -7068 | 7.42E-05 | 792  | 0.333333 | 0.011015 | USP7     |
| 8362.013 | 6.387327 | -7068 | 7.53E-05 | 1016 | 0.333333 | 0.013929 | CRK      |
| 10534.22 | 4.852237 | -7068 | 7.60E-05 | 1322 | 0.333333 | 0.015995 | EP300    |
| 7319.464 | 7.710683 | -7068 | 7.45E-05 | 826  | 0.333333 | 0.011368 | RBM5     |
| 25100.3  | 7.723673 | -7068 | 7.85E-05 | 1525 | 0.333333 | 0.021609 | SOD3     |
| 8568.532 | 7.443594 | -7068 | 7.48E-05 | 894  | 0.333333 | 0.011636 | CSF2RB   |
| 11682.06 | 6.95115  | -7068 | 7.60E-05 | 1098 | 0.333333 | 0.015109 | CYTIP    |
| 9111.687 | 6.952181 | -7068 | 7.57E-05 | 1018 | 0.333333 | 0.015388 | NEDD4    |
| 13997.81 | 6.151292 | -7068 | 7.71E-05 | 1335 | 0.333333 | 0.018477 | CTPS1    |
| 11086.49 | 9.493655 | -7068 | 7.51E-05 | 879  | 0.333333 | 0.012041 | DRAP1    |
| 8666.355 | 7.98147  | -7068 | 7.47E-05 | 851  | 0.333333 | 0.010895 | PRKCG    |
| 19653.86 | 6.739628 | -7068 | 7.82E-05 | 1503 | 0.333333 | 0.022191 | EPS8     |
| 8237.915 | 7.095465 | -7068 | 7.52E-05 | 928  | 0.333333 | 0.012552 | GRN      |
| 6757.292 | 9.520662 | -7068 | 7.40E-05 | 684  | 0.333333 | 0.009685 | CDKN2D   |
| 12190.03 | 5.60603  | -7068 | 7.72E-05 | 1345 | 0.333333 | 0.019298 | CCT5     |
| 14535.12 | 5.529044 | -7068 | 7.72E-05 | 1461 | 0.333333 | 0.019782 | PSMA3    |
| 5831.569 | 5.98176  | -7068 | 7.48E-05 | 868  | 0.333333 | 0.012699 | DDX1     |
| 13047.33 | 5.936028 | -7068 | 7.72E-05 | 1351 | 0.333333 | 0.019961 | NRAS     |
| 9529.233 | 6.680787 | -7068 | 7.58E-05 | 1075 | 0.333333 | 0.015987 | SMURF1   |
| 11305.92 | 8.749129 | -7068 | 7.53E-05 | 950  | 0.333333 | 0.013365 | MED24    |
| 11260.31 | 10.68593 | -7068 | 7.45E-05 | 774  | 0.333333 | 0.009658 | CTF1     |
| 11063.42 | 6.083419 | -7068 | 7.65E-05 | 1224 | 0.333333 | 0.017718 | PPP2CB   |
| 15871.8  | 7.373807 | -7068 | 7.71E-05 | 1254 | 0.333333 | 0.016912 | CAPNS1   |
| 15334.11 | 6.430479 | -7068 | 7.69E-05 | 1330 | 0.333333 | 0.017806 | MGP      |
| 7806.19  | 5.430011 | -7068 | 7.57E-05 | 1092 | 0.333333 | 0.015129 | GART     |
| 16955.25 | 7.883473 | -7068 | 7.69E-05 | 1240 | 0.333333 | 0.016656 | FOSL1    |
| 9701.9   | 7.237654 | -7068 | 7.55E-05 | 996  | 0.333333 | 0.014103 | ACADM    |

|          |          |       |          |      |          |          |           |
|----------|----------|-------|----------|------|----------|----------|-----------|
| 20288.59 | 6.888378 | -7068 | 7.83E-05 | 1511 | 0.333333 | 0.022499 | RIT2      |
| 6899.49  | 7.333946 | -7068 | 7.46E-05 | 830  | 0.333333 | 0.011626 | GABARAPL2 |
| 4963.272 | 6.735253 | -7068 | 7.38E-05 | 711  | 0.333333 | 0.008745 | GZMK      |
| 21330.55 | 6.224291 | -7068 | 7.82E-05 | 1596 | 0.333333 | 0.022392 | SYT1      |
| 20938.86 | 7.270937 | -7068 | 7.79E-05 | 1446 | 0.333333 | 0.020086 | HCLS1     |
| 10463.91 | 5.894061 | -7068 | 7.63E-05 | 1206 | 0.333333 | 0.017039 | POLA1     |
| 7219.776 | 8.092439 | -7068 | 7.44E-05 | 789  | 0.333333 | 0.010317 | ICAM3     |
| 9712.368 | 6.811635 | -7068 | 7.57E-05 | 1032 | 0.333333 | 0.014727 | GABRA1    |
| 15955.45 | 6.546136 | -7068 | 7.72E-05 | 1347 | 0.333333 | 0.017608 | SNRPA     |
| 5264.422 | 8.463221 | -7068 | 7.38E-05 | 660  | 0.333333 | 0.009262 | NDP       |
| 3644.569 | 9.366326 | -7068 | 7.32E-05 | 523  | 0.333333 | 0.008045 | HIST1H2BK |
| 25631    | 6.502169 | -7068 | 7.97E-05 | 1768 | 0.333333 | 0.026254 | PIK3C3    |
| 15522.61 | 7.044166 | -7068 | 7.69E-05 | 1280 | 0.333333 | 0.018088 | PCSK1     |
| 13097.55 | 10.14461 | -7068 | 7.51E-05 | 887  | 0.333333 | 0.011991 | MMP17     |
| 9360.66  | 6.274012 | -7068 | 7.55E-05 | 1078 | 0.333333 | 0.014413 | HSP90AB1  |
| 12177.66 | 5.497235 | -7068 | 7.69E-05 | 1344 | 0.333333 | 0.018779 | CSE1L     |
| 17231.03 | 7.499015 | -7068 | 7.69E-05 | 1284 | 0.333333 | 0.016561 | ASGR1     |
| 15073.62 | 6.079462 | -7068 | 7.75E-05 | 1420 | 0.333333 | 0.020109 | PARP1     |
| 14147.23 | 5.828973 | -7068 | 7.75E-05 | 1409 | 0.333333 | 0.020633 | PTGES3    |
| 13575.68 | 6.7466   | -7068 | 7.66E-05 | 1236 | 0.333333 | 0.017449 | AMPH      |
| 15429.51 | 8.033757 | -7068 | 7.65E-05 | 1161 | 0.333333 | 0.016677 | ATP12A    |
| 11978.35 | 6.691143 | -7068 | 7.64E-05 | 1174 | 0.333333 | 0.017894 | SIAH1     |
| 6915.948 | 5.065471 | -7068 | 7.54E-05 | 1057 | 0.333333 | 0.014429 | TOPBP1    |
| 8948.978 | 9.003704 | -7068 | 7.49E-05 | 834  | 0.333333 | 0.012412 | MUTYH     |
| 11420.55 | 5.011061 | -7068 | 7.67E-05 | 1381 | 0.333333 | 0.018104 | LYN       |
| 16818.69 | 6.318575 | -7068 | 7.77E-05 | 1452 | 0.333333 | 0.020889 | SCP2      |
| 12794.2  | 6.367679 | -7068 | 7.66E-05 | 1266 | 0.333333 | 0.017719 | PTK2B     |
| 8731.802 | 8.639006 | -7068 | 7.46E-05 | 824  | 0.333333 | 0.010827 | S100A1    |
| 5845.7   | 8.480735 | -7068 | 7.41E-05 | 701  | 0.333333 | 0.009693 | NOS2      |
| 12076.91 | 5.782207 | -7068 | 7.67E-05 | 1309 | 0.333333 | 0.018508 | NR3C1     |
| 8149.287 | 8.392081 | -7068 | 7.44E-05 | 805  | 0.333333 | 0.010167 | MYH7      |
| 12884.51 | 8.466215 | -7068 | 7.56E-05 | 1001 | 0.333333 | 0.012656 | PIGR      |
| 15283.77 | 6.914903 | -7068 | 7.70E-05 | 1285 | 0.333333 | 0.017523 | TOMM40    |
| 6589.077 | 7.013496 | -7068 | 7.46E-05 | 841  | 0.333333 | 0.011885 | DYNLL1    |
| 10629.25 | 5.646166 | -7068 | 7.62E-05 | 1236 | 0.333333 | 0.016898 | CASP3     |
| 6000.396 | 7.521879 | -7068 | 7.40E-05 | 753  | 0.333333 | 0.009373 | WAS       |
| 11172.46 | 6.522794 | -7068 | 7.61E-05 | 1164 | 0.333333 | 0.016735 | FOXO1     |
| 16420.27 | 4.910729 | -7068 | 7.79E-05 | 1683 | 0.333333 | 0.021699 | MAPK1     |
| 4954.363 | 8.123845 | -7068 | 7.39E-05 | 663  | 0.333333 | 0.009779 | METTL18   |
| 5737.072 | 7.57297  | -7068 | 7.42E-05 | 732  | 0.333333 | 0.00986  | AES       |
| 24594.14 | 6.01753  | -7068 | 7.94E-05 | 1806 | 0.333333 | 0.025621 | AHR       |



|          |          |       |          |      |          |          |         |
|----------|----------|-------|----------|------|----------|----------|---------|
| 7008.704 | 7.572915 | -7068 | 7.45E-05 | 802  | 0.333333 | 0.010491 | GPX2    |
| 18635.24 | 7.058926 | -7068 | 7.77E-05 | 1401 | 0.333333 | 0.01972  | CSF3R   |
| 9596.141 | 7.48012  | -7068 | 7.54E-05 | 981  | 0.333333 | 0.013922 | QDPR    |
| 13292.45 | 7.033541 | -7068 | 7.61E-05 | 1169 | 0.333333 | 0.015026 | SNRNP70 |
| 5468.094 | 8.500374 | -7068 | 7.37E-05 | 645  | 0.333333 | 0.008319 | CD19    |
| 34756.39 | 7.384477 | -7068 | 8.05E-05 | 1873 | 0.333333 | 0.02711  | PRL     |
| 12824.75 | 6.2073   | -7068 | 7.66E-05 | 1261 | 0.333333 | 0.016841 | HCK     |
| 14545.3  | 8.433792 | -7068 | 7.56E-05 | 1048 | 0.333333 | 0.013031 | CYP11A1 |
| 7368.891 | 6.737039 | -7068 | 7.47E-05 | 898  | 0.333333 | 0.01149  | PRPF4   |
| 9632.952 | 9.658973 | -7068 | 7.47E-05 | 806  | 0.333333 | 0.010309 | CD70    |
| 21790.71 | 6.603518 | -7068 | 7.86E-05 | 1592 | 0.333333 | 0.022558 | FMOD    |
| 12011.43 | 7.010879 | -7068 | 7.66E-05 | 1161 | 0.333333 | 0.018133 | ZFC3H1  |
| 15795.94 | 7.473152 | -7068 | 7.71E-05 | 1270 | 0.333333 | 0.019416 | SORL1   |
| 1999.768 | 6.865165 | -7068 | 7.28E-05 | 476  | 0.333333 | 0.007241 | PEX1    |
| 14012.11 | 6.921113 | -7068 | 7.69E-05 | 1249 | 0.333333 | 0.018607 | STT3A   |
| 6544.739 | 6.767401 | -7068 | 7.43E-05 | 837  | 0.333333 | 0.010306 | SPI1    |
| 11304.04 | 6.061338 | -7068 | 7.67E-05 | 1241 | 0.333333 | 0.018814 | SMARCA5 |
| 33526.95 | 6.919294 | -7068 | 8.07E-05 | 1946 | 0.333333 | 0.028739 | PARK2   |
| 19577.01 | 5.502003 | -7068 | 7.89E-05 | 1716 | 0.333333 | 0.024151 | CCT2    |
| 14463.43 | 7.544392 | -7068 | 7.63E-05 | 1150 | 0.333333 | 0.01509  | SLC17A3 |
| 10118.39 | 5.853816 | -7068 | 7.60E-05 | 1165 | 0.333333 | 0.015667 | DNMT1   |
| 13134.34 | 5.558652 | -7068 | 7.71E-05 | 1360 | 0.333333 | 0.018264 | ILF2    |
| 11247.93 | 5.886114 | -7068 | 7.66E-05 | 1243 | 0.333333 | 0.017767 | PTPRC   |
| 8403.797 | 8.125258 | -7068 | 7.49E-05 | 860  | 0.333333 | 0.011756 | XRCC1   |
| 8640.651 | 7.128451 | -7068 | 7.51E-05 | 945  | 0.333333 | 0.012442 | GSTZ1   |
| 6165.43  | 7.114984 | -7068 | 7.43E-05 | 783  | 0.333333 | 0.010378 | NXF1    |
| 5638.13  | 7.27393  | -7068 | 7.43E-05 | 772  | 0.333333 | 0.011544 | AKAP9   |
| 8186.295 | 8.746896 | -7068 | 7.45E-05 | 793  | 0.333333 | 0.011093 | DRD1    |
| 12721.72 | 6.26416  | -7068 | 7.65E-05 | 1269 | 0.333333 | 0.01738  | PAK1    |
| 11524.43 | 10.33969 | -7068 | 7.47E-05 | 804  | 0.333333 | 0.010292 | SLC5A5  |
| 6234.581 | 7.465927 | -7068 | 7.43E-05 | 761  | 0.333333 | 0.010161 | LSP1    |
| 5320.334 | 6.518063 | -7068 | 7.45E-05 | 794  | 0.333333 | 0.011437 | SRP19   |
| 6802.648 | 6.294861 | -7068 | 7.52E-05 | 944  | 0.333333 | 0.014022 | ADCY7   |
| 12405.54 | 6.449036 | -7068 | 7.64E-05 | 1211 | 0.333333 | 0.015928 | EIF6    |
| 8497.986 | 5.949441 | -7068 | 7.60E-05 | 1091 | 0.333333 | 0.016612 | TRIP12  |
| 5618.572 | 8.077999 | -7068 | 7.41E-05 | 695  | 0.333333 | 0.009229 | AAMP    |
| 18602.98 | 7.996539 | -7068 | 7.71E-05 | 1295 | 0.333333 | 0.018671 | CAMK4   |
| 14320.7  | 9.211096 | -7068 | 7.59E-05 | 1018 | 0.333333 | 0.014158 | COX6A2  |
| 18371.82 | 7.164472 | -7068 | 7.74E-05 | 1388 | 0.333333 | 0.018706 | MAP3K3  |
| 7326.946 | 9.436787 | -7068 | 7.42E-05 | 707  | 0.333333 | 0.009466 | PALM    |
| 23995.24 | 5.498298 | -7068 | 7.94E-05 | 1916 | 0.333333 | 0.02545  | MAPK14  |

|          |          |       |          |      |          |          |        |
|----------|----------|-------|----------|------|----------|----------|--------|
| 7224.028 | 6.547086 | -7068 | 7.54E-05 | 960  | 0.333333 | 0.015322 | RCOR1  |
| 7830.784 | 6.921969 | -7068 | 7.53E-05 | 960  | 0.333333 | 0.013653 | DLST   |
| 22278.5  | 6.36129  | -7068 | 7.89E-05 | 1665 | 0.333333 | 0.024264 | TGFBR3 |
| 5155.529 | 10.72647 | -7068 | 7.32E-05 | 532  | 0.333333 | 0.007081 | CSN2   |
| 11630.17 | 8.020948 | -7068 | 7.48E-05 | 913  | 0.25     | 0.011675 | ZNF140 |
| 11094.5  | 7.083072 | -7068 | 7.62E-05 | 1112 | 0.333333 | 0.016642 | BTG1   |
| 9081.378 | 6.212812 | -7068 | 7.60E-05 | 1087 | 0.333333 | 0.016315 | PUM1   |
| 8428.617 | 8.016721 | -7068 | 7.50E-05 | 872  | 0.333333 | 0.012861 | RRAGA  |
| 15331.42 | 8.951285 | -7068 | 7.60E-05 | 1089 | 0.333333 | 0.01568  | TFAP4  |
| 5792.515 | 7.911508 | -7068 | 7.42E-05 | 711  | 0.333333 | 0.009347 | GPS2   |
| 5944.577 | 5.498296 | -7068 | 7.49E-05 | 949  | 0.333333 | 0.013334 | E2F3   |
| 6924.889 | 7.734775 | -7068 | 7.47E-05 | 815  | 0.333333 | 0.012194 | CGRRF1 |
| 7185.186 | 5.935501 | -7068 | 7.54E-05 | 1000 | 0.333333 | 0.01517  | TRAM1  |
| 24732.14 | 6.392598 | -7068 | 7.94E-05 | 1751 | 0.333333 | 0.02538  | PRKCQ  |
| 18772.07 | 7.288313 | -7068 | 7.75E-05 | 1410 | 0.333333 | 0.019633 | IKBKE  |
| 8634.079 | 5.840195 | -7068 | 7.54E-05 | 1072 | 0.333333 | 0.013865 | BTB    |
| 5487.515 | 7.896486 | -7068 | 7.39E-05 | 702  | 0.333333 | 0.009245 | APBB1  |
| 6596.907 | 6.195312 | -7068 | 7.46E-05 | 886  | 0.333333 | 0.011679 | TBP    |
| 6956.768 | 8.594554 | -7068 | 7.42E-05 | 728  | 0.333333 | 0.009432 | REG1B  |
| 25242.12 | 5.946124 | -7068 | 8.01E-05 | 1889 | 0.333333 | 0.027723 | TOP1   |
| 17330.23 | 6.240491 | -7068 | 7.74E-05 | 1435 | 0.333333 | 0.01838  | CPB2   |
| 10459.07 | 6.955684 | -7068 | 7.61E-05 | 1092 | 0.333333 | 0.016429 | PNRC1  |
| 7403.827 | 6.546854 | -7068 | 7.49E-05 | 912  | 0.333333 | 0.012565 | MAK16  |
| 6763.085 | 7.436014 | -7068 | 7.44E-05 | 792  | 0.333333 | 0.010542 | ABCC8  |
| 7374.323 | 6.534303 | -7068 | 7.55E-05 | 954  | 0.333333 | 0.015081 | VPS26A |
| 10974.18 | 7.005697 | -7068 | 7.60E-05 | 1087 | 0.333333 | 0.015844 | AQP4   |
| 10855.74 | 6.555422 | -7068 | 7.62E-05 | 1129 | 0.333333 | 0.016773 | EYA1   |
| 20241.33 | 6.573564 | -7068 | 7.86E-05 | 1565 | 0.333333 | 0.023349 | SATB1  |
| 6480.171 | 8.141262 | -7068 | 7.42E-05 | 733  | 0.333333 | 0.009824 | CD40LG |
| 16630.99 | 5.868693 | -7068 | 7.83E-05 | 1545 | 0.333333 | 0.023126 | ARPC5  |
| 6846.522 | 7.539333 | -7068 | 7.43E-05 | 795  | 0.333333 | 0.010598 | FLNC   |
| 9745.138 | 7.501565 | -7068 | 7.52E-05 | 964  | 0.333333 | 0.013384 | MPO    |
| 36607.28 | 6.411216 | -7068 | 8.14E-05 | 2099 | 0.333333 | 0.030526 | RDX    |
| 10177.92 | 11.75992 | -7068 | 7.38E-05 | 646  | 0.333333 | 0.007242 | ARR3   |
| 12084.72 | 6.689633 | -7068 | 7.61E-05 | 1161 | 0.333333 | 0.015579 | C5     |
| 6997.392 | 7.993909 | -7068 | 7.45E-05 | 790  | 0.333333 | 0.011164 | CELSR2 |
| 9491.04  | 8.292389 | -7068 | 7.52E-05 | 904  | 0.333333 | 0.013171 | ABCA3  |
| 6079.23  | 6.480422 | -7068 | 7.47E-05 | 845  | 0.333333 | 0.011995 | TRIM22 |
| 9632.227 | 8.951784 | -7068 | 7.49E-05 | 847  | 0.333333 | 0.011126 | FUT1   |
| 7894.328 | 7.043622 | -7068 | 7.49E-05 | 886  | 0.333333 | 0.011724 | WDR46  |
| 24315.05 | 6.998062 | -7068 | 7.89E-05 | 1640 | 0.333333 | 0.023257 | GSTP1  |

|          |          |       |          |      |          |          |          |
|----------|----------|-------|----------|------|----------|----------|----------|
| 8270.936 | 7.180346 | -7068 | 7.51E-05 | 934  | 0.333333 | 0.013593 | RAP2A    |
| 6186.906 | 6.186595 | -7068 | 7.50E-05 | 906  | 0.333333 | 0.01371  | CNBP     |
| 8011.584 | 6.518575 | -7068 | 7.53E-05 | 975  | 0.333333 | 0.013386 | FGR      |
| 11049.86 | 6.82909  | -7068 | 7.61E-05 | 1102 | 0.333333 | 0.015974 | NUP155   |
| 13211.58 | 6.93175  | -7068 | 7.66E-05 | 1209 | 0.333333 | 0.017214 | CD38     |
| 7006.687 | 6.716098 | -7068 | 7.49E-05 | 909  | 0.333333 | 0.013128 | PIK3CG   |
| 5720.931 | 5.488881 | -7068 | 7.43E-05 | 902  | 0.333333 | 0.011221 | LCK      |
| 12430.88 | 5.198016 | -7068 | 7.68E-05 | 1382 | 0.333333 | 0.018693 | KPNB1    |
| 14351.59 | 6.230784 | -7068 | 7.71E-05 | 1359 | 0.333333 | 0.018981 | GAPDH    |
| 10058.51 | 6.068522 | -7068 | 7.62E-05 | 1167 | 0.333333 | 0.01754  | ZEB1     |
| 8283.353 | 6.066311 | -7068 | 7.57E-05 | 1057 | 0.333333 | 0.015876 | RAP1A    |
| 11953.88 | 7.077744 | -7068 | 7.61E-05 | 1148 | 0.333333 | 0.015919 | TAT      |
| 13134.56 | 5.976698 | -7068 | 7.67E-05 | 1291 | 0.333333 | 0.016747 | PSMC4    |
| 14939.34 | 6.13904  | -7068 | 7.71E-05 | 1382 | 0.333333 | 0.018876 | BIRC3    |
| 11851.24 | 8.102938 | -7068 | 7.58E-05 | 1027 | 0.333333 | 0.015055 | FICD     |
| 10318.19 | 5.518851 | -7068 | 7.63E-05 | 1244 | 0.333333 | 0.017187 | RHOA     |
| 10045.1  | 7.01275  | -7068 | 7.56E-05 | 1031 | 0.333333 | 0.013985 | DHX38    |
| 9624.95  | 6.670449 | -7068 | 7.58E-05 | 1069 | 0.333333 | 0.015866 | KMT2A    |
| 18998.75 | 7.372194 | -7068 | 7.72E-05 | 1358 | 0.333333 | 0.018629 | SRPK2    |
| 10305.71 | 7.443061 | -7068 | 7.56E-05 | 1017 | 0.333333 | 0.014385 | FURIN    |
| 7431.336 | 9.124778 | -7068 | 7.43E-05 | 738  | 0.333333 | 0.009933 | POMC     |
| 28364.17 | 5.332935 | -7068 | 8.03E-05 | 2103 | 0.333333 | 0.027915 | PIK3R1   |
| 6445.631 | 6.236333 | -7068 | 7.48E-05 | 886  | 0.333333 | 0.012537 | CBX1     |
| 16728.96 | 6.49814  | -7068 | 7.77E-05 | 1421 | 0.333333 | 0.020761 | F3       |
| 7674.867 | 6.220975 | -7068 | 7.53E-05 | 973  | 0.333333 | 0.014133 | SUCLA2   |
| 4530.308 | 7.055446 | -7068 | 7.37E-05 | 670  | 0.333333 | 0.008623 | TNNT3    |
| 2475.86  | 5.499593 | -7068 | 7.30E-05 | 589  | 0.333333 | 0.007186 | RPS21    |
| 10172.26 | 8.522008 | -7068 | 7.51E-05 | 891  | 0.333333 | 0.012044 | HSD11B2  |
| 9423.941 | 6.304899 | -7068 | 7.56E-05 | 1090 | 0.333333 | 0.014821 | PLCG2    |
| 14921.91 | 6.414896 | -7068 | 7.74E-05 | 1357 | 0.333333 | 0.019901 | SEC61G   |
| 6166.468 | 8.562446 | -7068 | 7.42E-05 | 711  | 0.333333 | 0.010265 | CLASRP   |
| 11176.17 | 7.779005 | -7068 | 7.53E-05 | 995  | 0.333333 | 0.013269 | STAR     |
| 10992.79 | 8.106034 | -7068 | 7.56E-05 | 988  | 0.333333 | 0.01421  | CALCOCO1 |
| 10178.12 | 7.755005 | -7068 | 7.54E-05 | 978  | 0.333333 | 0.013274 | MB       |
| 10137.72 | 6.761955 | -7068 | 7.61E-05 | 1103 | 0.333333 | 0.016946 | TP53BP2  |
| 5899.053 | 7.940321 | -7068 | 7.41E-05 | 709  | 0.333333 | 0.010198 | FANCL    |
| 13050.64 | 10.21039 | -7068 | 7.49E-05 | 858  | 0.333333 | 0.011036 | MYOG     |
| 20733.9  | 6.794736 | -7068 | 7.82E-05 | 1534 | 0.333333 | 0.021227 | ITGA3    |
| 16047.86 | 5.977581 | -7068 | 7.77E-05 | 1479 | 0.333333 | 0.020559 | AHCY     |
| 16276.24 | 6.715483 | -7068 | 7.70E-05 | 1323 | 0.333333 | 0.017556 | MTTP     |
| 14109.15 | 6.928318 | -7068 | 7.67E-05 | 1243 | 0.333333 | 0.017464 | CD8A     |

|          |          |       |          |      |          |          |          |
|----------|----------|-------|----------|------|----------|----------|----------|
| 4620.682 | 6.372993 | -7068 | 7.42E-05 | 760  | 0.333333 | 0.011235 | ROCK1    |
| 28191.92 | 6.91307  | -7068 | 7.97E-05 | 1772 | 0.333333 | 0.025598 | KDM1A    |
| 21000.28 | 10.22529 | -7068 | 7.62E-05 | 1067 | 0.333333 | 0.012686 | CRYBB3   |
| 14736.76 | 5.723751 | -7068 | 7.76E-05 | 1462 | 0.333333 | 0.020833 | EIF4E    |
| 6774.268 | 8.580607 | -7068 | 7.42E-05 | 733  | 0.333333 | 0.009037 | RPL41    |
| 8109.455 | 4.681017 | -7068 | 7.53E-05 | 1182 | 0.333333 | 0.014264 | CREBBP   |
| 6271.662 | 8.741933 | -7068 | 7.40E-05 | 676  | 0.333333 | 0.00821  | SKIV2L   |
| 20315.52 | 6.063661 | -7068 | 7.86E-05 | 1656 | 0.333333 | 0.023402 | DUT      |
| 5970.922 | 7.392189 | -7068 | 7.42E-05 | 753  | 0.333333 | 0.010045 | GFAP     |
| 16447.1  | 6.162077 | -7068 | 7.79E-05 | 1481 | 0.333333 | 0.021921 | PRNP     |
| 7911.031 | 8.361426 | -7068 | 7.46E-05 | 805  | 0.333333 | 0.011759 | GLRA1    |
| 7331.752 | 7.047981 | -7068 | 7.48E-05 | 888  | 0.333333 | 0.012356 | STK11    |
| 13969.26 | 6.280012 | -7068 | 7.76E-05 | 1357 | 0.333333 | 0.021243 | DYNLT3   |
| 4985.861 | 7.054324 | -7068 | 7.43E-05 | 749  | 0.333333 | 0.011677 | SETD2    |
| 19617.62 | 5.935621 | -7068 | 7.90E-05 | 1660 | 0.333333 | 0.0251   | UBE3A    |
| 9255.857 | 6.638712 | -7068 | 7.56E-05 | 1040 | 0.333333 | 0.014909 | GPN1     |
| 5389.536 | 7.357446 | -7068 | 7.43E-05 | 745  | 0.333333 | 0.011089 | SLC26A2  |
| 8605.353 | 7.449894 | -7068 | 7.49E-05 | 910  | 0.333333 | 0.011608 | GTF2F1   |
| 8949.426 | 7.067167 | -7068 | 7.53E-05 | 980  | 0.333333 | 0.013656 | ATP6V1B2 |
| 6922.373 | 7.364057 | -7068 | 7.40E-05 | 748  | 0.333333 | 0.009627 | ZNF43    |
| 15947.2  | 6.538525 | -7068 | 7.76E-05 | 1384 | 0.333333 | 0.020949 | PKN2     |
| 12720.02 | 6.543022 | -7068 | 7.67E-05 | 1249 | 0.333333 | 0.018398 | UMPS     |
| 9560.694 | 7.209551 | -7068 | 7.54E-05 | 965  | 0.333333 | 0.01287  | POLD2    |
| 7286.521 | 6.394297 | -7068 | 7.51E-05 | 942  | 0.333333 | 0.013463 | BLNK     |
| 17224.94 | 6.874235 | -7068 | 7.76E-05 | 1393 | 0.333333 | 0.020426 | MME      |
| 9465.583 | 6.349849 | -7068 | 7.56E-05 | 1070 | 0.333333 | 0.014505 | IL7R     |
| 19199.99 | 6.109761 | -7068 | 7.81E-05 | 1583 | 0.333333 | 0.021297 | CDKN1A   |
| 4630.351 | 4.952555 | -7068 | 7.41E-05 | 848  | 0.333333 | 0.010437 | RPL10A   |
| 16837.92 | 8.058019 | -7068 | 7.69E-05 | 1222 | 0.333333 | 0.017593 | VPS52    |
| 18590.5  | 5.877185 | -7068 | 7.85E-05 | 1606 | 0.333333 | 0.022883 | PSMA5    |
| 10213.16 | 4.49896  | -7068 | 7.62E-05 | 1350 | 0.333333 | 0.016304 | PRIM1    |
| 11659.96 | 6.484374 | -7068 | 7.65E-05 | 1187 | 0.333333 | 0.016807 | AATF     |
| 13613.88 | 6.755691 | -7068 | 7.69E-05 | 1255 | 0.333333 | 0.01859  | TXNL1    |
| 13663    | 6.751508 | -7068 | 7.68E-05 | 1258 | 0.333333 | 0.017872 | ICAM2    |
| 9488.23  | 7.238496 | -7068 | 7.54E-05 | 997  | 0.333333 | 0.013631 | CDC25B   |
| 11208.86 | 6.506778 | -7068 | 7.64E-05 | 1178 | 0.333333 | 0.018019 | SNAP23   |
| 13772.98 | 5.142542 | -7068 | 7.74E-05 | 1489 | 0.333333 | 0.020343 | HNRNPR   |
| 15607.05 | 6.636002 | -7068 | 7.76E-05 | 1376 | 0.333333 | 0.021018 | RNF4     |
| 3332.775 | 5.871916 | -7068 | 7.34E-05 | 650  | 0.333333 | 0.008431 | RPS27A   |
| 7735.181 | 7.001003 | -7068 | 7.50E-05 | 905  | 0.333333 | 0.012389 | CD69     |
| 15218.4  | 5.397899 | -7068 | 7.75E-05 | 1527 | 0.333333 | 0.019873 | NFKB1    |

|          |          |       |          |      |          |          |          |
|----------|----------|-------|----------|------|----------|----------|----------|
| 11283.08 | 6.140392 | -7068 | 7.67E-05 | 1232 | 0.333333 | 0.018371 | CLIP1    |
| 10524.01 | 6.407182 | -7068 | 7.61E-05 | 1142 | 0.333333 | 0.016579 | PIK3CB   |
| 14497.15 | 6.417289 | -7068 | 7.74E-05 | 1347 | 0.333333 | 0.020308 | KIF5B    |
| 5702.256 | 7.547257 | -7068 | 7.41E-05 | 718  | 0.333333 | 0.00929  | PKN1     |
| 10574.06 | 7.851315 | -7068 | 7.55E-05 | 963  | 0.333333 | 0.013051 | FSHB     |
| 13563.68 | 6.536774 | -7068 | 7.69E-05 | 1275 | 0.333333 | 0.018726 | PPP2R3A  |
| 5533.35  | 7.160287 | -7068 | 7.43E-05 | 769  | 0.333333 | 0.010484 | PSMB10   |
| 10557.08 | 10.14154 | -7068 | 7.46E-05 | 796  | 0.333333 | 0.010258 | MAPK8IP2 |
| 9450.817 | 8.698847 | -7068 | 7.48E-05 | 851  | 0.333333 | 0.011332 | SNTA1    |
| 9098.193 | 8.30535  | -7068 | 7.50E-05 | 869  | 0.333333 | 0.012197 | GSTM5    |
| 11253.69 | 6.641555 | -7068 | 7.65E-05 | 1154 | 0.333333 | 0.017655 | C1D      |
| 16699.45 | 6.60376  | -7068 | 7.76E-05 | 1403 | 0.333333 | 0.020176 | LDB2     |
| 9205.685 | 7.672452 | -7068 | 7.51E-05 | 894  | 0.333333 | 0.012811 | DRG1     |
| 11776.9  | 10.27693 | -7068 | 7.47E-05 | 804  | 0.333333 | 0.009978 | OPN1SW   |
| 11325.93 | 7.418152 | -7068 | 7.55E-05 | 1039 | 0.333333 | 0.013296 | CDK5     |
| 33902.03 | 6.244874 | -7068 | 8.07E-05 | 2025 | 0.333333 | 0.028111 | UQCRRF51 |
| 7950.238 | 8.652612 | -7068 | 7.47E-05 | 793  | 0.333333 | 0.010781 | ARFIP2   |
| 7646.482 | 7.153197 | -7068 | 7.49E-05 | 897  | 0.333333 | 0.012385 | DECR1    |
| 6077.662 | 6.344521 | -7068 | 7.46E-05 | 874  | 0.333333 | 0.012443 | GAB1     |
| 26374.47 | 7.059712 | -7068 | 7.88E-05 | 1649 | 0.333333 | 0.023012 | GLI3     |
| 17943.1  | 6.108965 | -7068 | 7.82E-05 | 1548 | 0.333333 | 0.02219  | CCT4     |
| 14330.78 | 5.708887 | -7068 | 7.76E-05 | 1459 | 0.333333 | 0.021792 | PTPN12   |
| 7387.777 | 6.318638 | -7068 | 7.51E-05 | 959  | 0.333333 | 0.013219 | GTF2B    |
| 17205.13 | 7.028345 | -7068 | 7.77E-05 | 1395 | 0.333333 | 0.020359 | FTL      |
| 8678.391 | 6.976709 | -7068 | 7.55E-05 | 976  | 0.333333 | 0.014376 | AUH      |
| 6473.108 | 8.861209 | -7068 | 7.38E-05 | 682  | 0.333333 | 0.008576 | RXRB     |
| 6336.949 | 7.079746 | -7068 | 7.47E-05 | 828  | 0.333333 | 0.012519 | PPIG     |
| 14975.78 | 5.845349 | -7068 | 7.71E-05 | 1422 | 0.333333 | 0.019196 | SRSF5    |
| 5341.24  | 6.588316 | -7068 | 7.46E-05 | 799  | 0.333333 | 0.012536 | VAMP7    |
| 8427.679 | 6.267637 | -7068 | 7.56E-05 | 1055 | 0.333333 | 0.015646 | PTEN     |
| 12794.13 | 7.348091 | -7068 | 7.61E-05 | 1118 | 0.333333 | 0.015366 | FOXF2    |
| 15025.05 | 5.657305 | -7068 | 7.75E-05 | 1487 | 0.333333 | 0.020849 | PTK2     |
| 12158.7  | 6.893479 | -7068 | 7.64E-05 | 1181 | 0.333333 | 0.017687 | TXNIP    |
| 14002.23 | 7.099563 | -7068 | 7.69E-05 | 1238 | 0.333333 | 0.018859 | DCTN6    |
| 11820.93 | 5.882993 | -7068 | 7.71E-05 | 1308 | 0.333333 | 0.020239 | CAPRIN1  |
| 9335.966 | 7.240411 | -7068 | 7.54E-05 | 983  | 0.333333 | 0.013639 | KAT5     |
| 8878.829 | 5.520155 | -7068 | 7.60E-05 | 1164 | 0.333333 | 0.01682  | SRRM1    |
| 4182.808 | 8.466681 | -7068 | 7.35E-05 | 594  | 0.333333 | 0.008525 | ZC3H13   |
| 9673.56  | 8.175575 | -7068 | 7.49E-05 | 878  | 0.333333 | 0.012309 | TSC2     |
| 16891.6  | 7.948961 | -7068 | 7.69E-05 | 1242 | 0.333333 | 0.018134 | ERCC6    |
| 14698.23 | 7.772911 | -7068 | 7.63E-05 | 1146 | 0.333333 | 0.015224 | EGF      |

|          |          |       |          |      |          |          |         |
|----------|----------|-------|----------|------|----------|----------|---------|
| 7302.414 | 5.045714 | -7068 | 7.55E-05 | 1099 | 0.333333 | 0.014658 | HNRNPK  |
| 15850.69 | 6.788574 | -7068 | 7.72E-05 | 1346 | 0.333333 | 0.019604 | GRIN2B  |
| 8407.105 | 9.485593 | -7068 | 7.43E-05 | 756  | 0.333333 | 0.010333 | HSD17B3 |
| 15851.8  | 7.623569 | -7068 | 7.65E-05 | 1194 | 0.333333 | 0.016351 | ISLR    |
| 4597.638 | 7.544693 | -7068 | 7.39E-05 | 673  | 0.333333 | 0.0101   | TBPL1   |
| 4236.695 | 6.488774 | -7068 | 7.39E-05 | 701  | 0.333333 | 0.009369 | CD52    |
| 18855.49 | 6.338766 | -7068 | 7.83E-05 | 1527 | 0.333333 | 0.021721 | HNRNPAB |
| 9222.298 | 7.343008 | -7068 | 7.57E-05 | 995  | 0.333333 | 0.015599 | HMG3    |
| 8317.722 | 6.755168 | -7068 | 7.52E-05 | 960  | 0.333333 | 0.013542 | GSTA4   |
| 14765.9  | 6.754592 | -7068 | 7.68E-05 | 1283 | 0.333333 | 0.017848 | ABCB1   |
| 33451.14 | 6.813487 | -7068 | 8.03E-05 | 1912 | 0.333333 | 0.027479 | TCF4    |
| 11772.13 | 7.364508 | -7068 | 7.62E-05 | 1114 | 0.333333 | 0.015931 | DDB2    |
| 10556.91 | 9.85629  | -7068 | 7.47E-05 | 796  | 0.333333 | 0.010478 | SLC9A3  |
| 17179.91 | 10.10267 | -7068 | 7.58E-05 | 1033 | 0.333333 | 0.013463 | GP1R    |
| 7268.134 | 7.386588 | -7068 | 7.46E-05 | 828  | 0.333333 | 0.010622 | NR0B2   |
| 8999.734 | 6.588303 | -7068 | 7.58E-05 | 1043 | 0.333333 | 0.015867 | CCNG2   |
| 14488.5  | 6.473204 | -7068 | 7.73E-05 | 1331 | 0.333333 | 0.0203   | ATP2B1  |
| 4836.277 | 7.520293 | -7068 | 7.38E-05 | 674  | 0.333333 | 0.00895  | ALAS2   |
| 6541.203 | 8.261526 | -7068 | 7.43E-05 | 738  | 0.333333 | 0.010011 | CDIPT   |
| 6841.466 | 8.031749 | -7068 | 7.44E-05 | 771  | 0.333333 | 0.010488 | ALDH3B2 |
| 12537.39 | 7.083621 | -7068 | 7.65E-05 | 1168 | 0.333333 | 0.017582 | SSBP2   |
| 5838.58  | 6.696882 | -7068 | 7.47E-05 | 824  | 0.333333 | 0.012673 | RSBN1   |
| 7524.009 | 6.698812 | -7068 | 7.51E-05 | 923  | 0.333333 | 0.01339  | EIF1B   |
| 11117.26 | 7.137337 | -7068 | 7.55E-05 | 1050 | 0.333333 | 0.014016 | STXBP1  |
| 8345.953 | 7.129144 | -7068 | 7.53E-05 | 954  | 0.333333 | 0.014177 | NELL2   |
| 5963.826 | 9.736359 | -7068 | 7.35E-05 | 591  | 0.333333 | 0.007451 | CLCN7   |
| 8009.156 | 5.587225 | -7068 | 7.57E-05 | 1092 | 0.333333 | 0.015565 | CDC5L   |
| 10643.59 | 6.334226 | -7068 | 7.63E-05 | 1172 | 0.333333 | 0.01752  | CANX    |
| 8632.405 | 7.904521 | -7068 | 7.50E-05 | 888  | 0.333333 | 0.012216 | SUOX    |
| 8746.242 | 9.253241 | -7068 | 7.47E-05 | 794  | 0.333333 | 0.010732 | MYEF2   |
| 10578.83 | 8.19277  | -7068 | 7.52E-05 | 959  | 0.333333 | 0.012768 | HSPB1   |
| 13861.01 | 6.239188 | -7068 | 7.71E-05 | 1343 | 0.333333 | 0.019248 | ITGA6   |
| 17391.02 | 6.58719  | -7068 | 7.79E-05 | 1455 | 0.333333 | 0.021757 | AP2B1   |
| 10795.25 | 6.219848 | -7068 | 7.63E-05 | 1182 | 0.333333 | 0.017393 | GTF2E2  |
| 7022.469 | 6.146896 | -7068 | 7.55E-05 | 981  | 0.333333 | 0.01552  | STRN3   |
| 8908.562 | 8.452289 | -7068 | 7.47E-05 | 850  | 0.333333 | 0.011432 | FMO1    |
| 3418.836 | 9.31339  | -7068 | 7.30E-05 | 484  | 0.333333 | 0.006438 | KCNS1   |
| 11763.64 | 7.429207 | -7068 | 7.58E-05 | 1044 | 0.333333 | 0.013655 | SLC17A1 |
| 8728.248 | 6.828001 | -7068 | 7.57E-05 | 1017 | 0.333333 | 0.015209 | GNAS    |
| 10950.76 | 7.985595 | -7068 | 7.55E-05 | 986  | 0.333333 | 0.014017 | NUCB2   |
| 14130.89 | 6.790766 | -7068 | 7.70E-05 | 1276 | 0.333333 | 0.018914 | ALCAM   |

|          |          |       |          |      |          |          |          |
|----------|----------|-------|----------|------|----------|----------|----------|
| 13938.05 | 6.855975 | -7068 | 7.68E-05 | 1254 | 0.333333 | 0.018339 | AMFR     |
| 15415.34 | 8.151782 | -7068 | 7.63E-05 | 1140 | 0.333333 | 0.015545 | ITGA10   |
| 6739.168 | 7.649737 | -7068 | 7.47E-05 | 810  | 0.333333 | 0.011731 | TMEM11   |
| 15121.04 | 5.653512 | -7068 | 7.75E-05 | 1468 | 0.333333 | 0.019916 | KDR      |
| 8770.164 | 6.531799 | -7068 | 7.51E-05 | 997  | 0.333333 | 0.012533 | VAV1     |
| 16650.2  | 6.925297 | -7068 | 7.74E-05 | 1358 | 0.333333 | 0.020345 | TCF12    |
| 20584.8  | 6.090797 | -7068 | 7.87E-05 | 1642 | 0.333333 | 0.023399 | VIM      |
| 25268.71 | 6.577504 | -7068 | 7.94E-05 | 1734 | 0.333333 | 0.025378 | ANK3     |
| 9031.626 | 6.95027  | -7068 | 7.56E-05 | 1015 | 0.333333 | 0.015087 | IGF2R    |
| 5178.74  | 9.694109 | -7068 | 7.36E-05 | 592  | 0.333333 | 0.008584 | ABCA5    |
| 6151.542 | 5.411564 | -7068 | 7.50E-05 | 980  | 0.333333 | 0.014059 | VCL      |
| 7752.906 | 6.800148 | -7068 | 7.52E-05 | 936  | 0.333333 | 0.013834 | PEX2     |
| 9852.336 | 7.2557   | -7068 | 7.58E-05 | 1033 | 0.333333 | 0.015639 | NCOA4    |
| 6144.974 | 6.352524 | -7068 | 7.49E-05 | 884  | 0.333333 | 0.013694 | MRPL19   |
| 7941.889 | 6.538097 | -7068 | 7.54E-05 | 974  | 0.333333 | 0.014136 | ODC1     |
| 8265.4   | 6.768609 | -7068 | 7.54E-05 | 981  | 0.333333 | 0.014339 | DHX8     |
| 6980.782 | 7.047296 | -7068 | 7.50E-05 | 882  | 0.333333 | 0.013059 | DCAF8    |
| 13326.21 | 5.685251 | -7068 | 7.74E-05 | 1407 | 0.333333 | 0.020747 | RAP1B    |
| 6015.758 | 9.982091 | -7068 | 7.35E-05 | 601  | 0.333333 | 0.007459 | CDX1     |
| 7386.813 | 6.890105 | -7068 | 7.49E-05 | 894  | 0.333333 | 0.012062 | ACTA1    |
| 23545.16 | 5.876688 | -7068 | 7.96E-05 | 1815 | 0.333333 | 0.026369 | ACTR3    |
| 12781.98 | 6.360474 | -7068 | 7.66E-05 | 1251 | 0.333333 | 0.017924 | NCOA3    |
| 7492.065 | 7.171455 | -7068 | 7.52E-05 | 912  | 0.333333 | 0.014044 | MAD2L1BP |
| 5226.458 | 8.068047 | -7068 | 7.38E-05 | 649  | 0.333333 | 0.008331 | CNGA3    |
| 4525.545 | 7.597568 | -7068 | 7.37E-05 | 660  | 0.333333 | 0.008595 | MAP3K14  |
| 7248.749 | 7.931821 | -7068 | 7.47E-05 | 810  | 0.333333 | 0.011862 | PNLIP    |
| 10344.73 | 7.083316 | -7068 | 7.60E-05 | 1079 | 0.333333 | 0.015853 | GLRX     |
| 7173.836 | 6.84938  | -7068 | 7.49E-05 | 897  | 0.333333 | 0.01288  | SF1      |
| 5799.967 | 6.997765 | -7068 | 7.43E-05 | 778  | 0.333333 | 0.010407 | DDX49    |
| 11389.29 | 7.469059 | -7068 | 7.60E-05 | 1071 | 0.333333 | 0.015557 | WWOX     |
| 16448.69 | 5.846624 | -7068 | 7.79E-05 | 1520 | 0.333333 | 0.022024 | SMAD1    |
| 18278.4  | 5.837133 | -7068 | 7.83E-05 | 1602 | 0.333333 | 0.022451 | SYK      |
| 5374.041 | 5.395045 | -7068 | 7.43E-05 | 878  | 0.333333 | 0.011124 | RPL7     |
| 3281.597 | 5.319312 | -7068 | 7.36E-05 | 694  | 0.333333 | 0.00933  | WRN      |
| 22755.06 | 5.595581 | -7068 | 7.94E-05 | 1824 | 0.333333 | 0.025465 | SNRPB2   |
| 7591.478 | 6.460995 | -7068 | 7.50E-05 | 945  | 0.333333 | 0.013463 | TTN      |
| 19522.49 | 7.022892 | -7068 | 7.82E-05 | 1487 | 0.333333 | 0.021821 | ADRB2    |
| 8148.557 | 6.233676 | -7068 | 7.54E-05 | 1024 | 0.333333 | 0.013931 | HMGA1    |
| 10901.72 | 7.045422 | -7068 | 7.60E-05 | 1097 | 0.333333 | 0.015305 | TUBA4A   |
| 16022.09 | 6.989988 | -7068 | 7.77E-05 | 1349 | 0.333333 | 0.021029 | AFF3     |
| 9397.507 | 6.328007 | -7068 | 7.60E-05 | 1092 | 0.333333 | 0.016701 | PIK3C2A  |

|          |          |       |          |      |          |          |           |
|----------|----------|-------|----------|------|----------|----------|-----------|
| 10179.92 | 8.396977 | -7068 | 7.51E-05 | 899  | 0.333333 | 0.0133   | TSPYL4    |
| 5148.647 | 6.338145 | -7068 | 7.45E-05 | 793  | 0.333333 | 0.011657 | PDHX      |
| 13493.52 | 6.41419  | -7068 | 7.63E-05 | 1235 | 0.333333 | 0.015774 | ITIH2     |
| 12433.28 | 6.652814 | -7068 | 7.67E-05 | 1217 | 0.333333 | 0.018127 | PRKAR2B   |
| 16290.37 | 7.146132 | -7068 | 7.72E-05 | 1318 | 0.333333 | 0.019303 | TSPAN8    |
| 7463.481 | 8.244515 | -7068 | 7.45E-05 | 796  | 0.333333 | 0.010739 | ABCF1     |
| 27277.5  | 7.037321 | -7068 | 7.94E-05 | 1715 | 0.333333 | 0.024228 | NCOR2     |
| 8541.922 | 6.811956 | -7068 | 7.54E-05 | 978  | 0.333333 | 0.014283 | CA3       |
| 5902.935 | 6.615262 | -7068 | 7.46E-05 | 831  | 0.333333 | 0.012386 | MPHOSPH10 |
| 3899.977 | 6.789748 | -7068 | 7.38E-05 | 670  | 0.333333 | 0.010278 | SH3GLB1   |
| 17505.38 | 6.413183 | -7068 | 7.77E-05 | 1458 | 0.333333 | 0.020559 | CXCR4     |
| 5171.347 | 6.935106 | -7068 | 7.39E-05 | 711  | 0.333333 | 0.008953 | KRT14     |
| 5974.362 | 7.513589 | -7068 | 7.43E-05 | 770  | 0.333333 | 0.010859 | MTA1      |
| 8375.535 | 7.026285 | -7068 | 7.52E-05 | 953  | 0.333333 | 0.01375  | BIN1      |
| 9690.531 | 6.047066 | -7068 | 7.62E-05 | 1128 | 0.333333 | 0.016857 | SLBP      |
| 13001.36 | 7.04631  | -7068 | 7.64E-05 | 1161 | 0.333333 | 0.016972 | TOMM70    |
| 5693.773 | 8.654199 | -7068 | 7.39E-05 | 679  | 0.333333 | 0.010027 | FAN1      |
| 10585.47 | 7.151927 | -7068 | 7.58E-05 | 1063 | 0.333333 | 0.015129 | CASP6     |
| 11321.86 | 4.745233 | -7068 | 7.67E-05 | 1393 | 0.333333 | 0.017757 | MCM3      |
| 9863.112 | 6.767944 | -7068 | 7.58E-05 | 1077 | 0.333333 | 0.01594  | STK3      |
| 12201.53 | 6.905067 | -7068 | 7.66E-05 | 1181 | 0.333333 | 0.017613 | DOCK2     |
| 10168.89 | 6.803547 | -7068 | 7.62E-05 | 1100 | 0.333333 | 0.01676  | IFNGR2    |
| 24518.53 | 6.454329 | -7068 | 7.96E-05 | 1744 | 0.333333 | 0.026272 | PAPSS1    |
| 5595.803 | 7.762691 | -7068 | 7.43E-05 | 741  | 0.333333 | 0.010983 | SRRM2     |
| 10111.53 | 6.347525 | -7068 | 7.65E-05 | 1147 | 0.333333 | 0.017899 | SNRNP27   |
| 11953.52 | 7.070581 | -7068 | 7.62E-05 | 1134 | 0.333333 | 0.016151 | TRIP13    |
| 14517.12 | 7.364128 | -7068 | 7.69E-05 | 1223 | 0.333333 | 0.018011 | FOXC1     |
| 15176.53 | 9.299994 | -7068 | 7.57E-05 | 1024 | 0.333333 | 0.013444 | KLK6      |
| 10303.77 | 6.677803 | -7068 | 7.63E-05 | 1126 | 0.333333 | 0.017308 | IK        |
| 12284.6  | 7.118856 | -7068 | 7.65E-05 | 1169 | 0.333333 | 0.01723  | CALCOCO2  |
| 9915.249 | 8.906428 | -7068 | 7.51E-05 | 866  | 0.333333 | 0.012072 | T         |
| 3889.741 | 8.937955 | -7068 | 7.31E-05 | 520  | 0.333333 | 0.006376 | AMPD1     |
| 16162.94 | 7.708172 | -7068 | 7.67E-05 | 1225 | 0.333333 | 0.017286 | TPO       |
| 12271.11 | 6.314914 | -7068 | 7.69E-05 | 1261 | 0.333333 | 0.019145 | MAN2A1    |
| 11822.05 | 5.511961 | -7068 | 7.70E-05 | 1351 | 0.333333 | 0.019593 | CBFB      |
| 10418.8  | 6.849725 | -7068 | 7.60E-05 | 1090 | 0.333333 | 0.015715 | PCBP1     |
| 11810.14 | 6.772319 | -7068 | 7.66E-05 | 1186 | 0.333333 | 0.017964 | ADD1      |
| 5642.665 | 7.703924 | -7068 | 7.41E-05 | 721  | 0.333333 | 0.01066  | COX7A2L   |
| 10054.52 | 5.695252 | -7068 | 7.62E-05 | 1208 | 0.333333 | 0.017509 | CDC27     |
| 9571.748 | 8.259347 | -7068 | 7.53E-05 | 928  | 0.333333 | 0.013751 | ADORA2B   |
| 17699.08 | 6.70634  | -7068 | 7.79E-05 | 1443 | 0.333333 | 0.021839 | AMOTL2    |



|          |          |       |          |      |          |          |         |
|----------|----------|-------|----------|------|----------|----------|---------|
| 12716.28 | 5.711472 | -7068 | 7.64E-05 | 1324 | 0.333333 | 0.016438 | RELA    |
| 12433.38 | 9.068947 | -7068 | 7.54E-05 | 942  | 0.333333 | 0.013245 | SLC10A2 |
| 7984.352 | 7.203539 | -7068 | 7.52E-05 | 918  | 0.333333 | 0.013239 | FMNL1   |
| 5339.192 | 9.086261 | -7068 | 7.37E-05 | 622  | 0.333333 | 0.008254 | MFSD10  |
| 9019.032 | 8.47966  | -7068 | 7.50E-05 | 858  | 0.333333 | 0.011798 | ALPI    |
| 13803.55 | 6.978935 | -7068 | 7.65E-05 | 1215 | 0.333333 | 0.017087 | ABCC2   |
| 9626.065 | 7.56767  | -7068 | 7.52E-05 | 943  | 0.333333 | 0.012466 | PIN1    |
| 15340.04 | 5.890911 | -7068 | 7.73E-05 | 1441 | 0.333333 | 0.019542 | MYH9    |
| 6487.695 | 7.113383 | -7068 | 7.47E-05 | 833  | 0.333333 | 0.012353 | SEC23B  |
| 8132.476 | 9.865371 | -7068 | 7.42E-05 | 723  | 0.333333 | 0.008963 | RAC3    |
| 6983.807 | 6.749413 | -7068 | 7.45E-05 | 871  | 0.333333 | 0.011629 | ACTN2   |
| 5827.662 | 6.246702 | -7068 | 7.45E-05 | 823  | 0.333333 | 0.010909 | BYSL    |
| 6101.231 | 6.987681 | -7068 | 7.45E-05 | 778  | 0.333333 | 0.011442 | BCAS2   |
| 6183.17  | 6.902949 | -7068 | 7.47E-05 | 831  | 0.333333 | 0.01264  | UBE2J1  |
| 6573.311 | 7.682437 | -7068 | 7.45E-05 | 768  | 0.333333 | 0.010482 | PRRC2A  |
| 17523.25 | 6.35356  | -7068 | 7.79E-05 | 1476 | 0.333333 | 0.02154  | PMP22   |
| 10320.86 | 6.674804 | -7068 | 7.58E-05 | 1094 | 0.333333 | 0.015133 | HSD17B4 |
| 15933.26 | 5.633437 | -7068 | 7.82E-05 | 1549 | 0.333333 | 0.023175 | NOLC1   |
| 7421.117 | 7.861241 | -7068 | 7.45E-05 | 823  | 0.333333 | 0.010455 | RPL39   |
| 9118.267 | 6.748879 | -7068 | 7.56E-05 | 1019 | 0.333333 | 0.014259 | PPP2R5D |
| 16814.42 | 6.640072 | -7068 | 7.76E-05 | 1404 | 0.333333 | 0.020774 | MAP1B   |
| 5446.113 | 8.917385 | -7068 | 7.39E-05 | 648  | 0.333333 | 0.008841 | PLCB3   |
| 5508.364 | 7.419491 | -7068 | 7.42E-05 | 738  | 0.333333 | 0.010534 | BDNF    |
| 22109.95 | 5.893488 | -7068 | 7.88E-05 | 1719 | 0.333333 | 0.02314  | CDH1    |
| 8741.795 | 5.843034 | -7068 | 7.55E-05 | 1073 | 0.333333 | 0.014162 | ACADSB  |
| 11718.01 | 6.323429 | -7068 | 7.64E-05 | 1218 | 0.333333 | 0.017731 | NCOA1   |
| 28930.16 | 6.911741 | -7068 | 8.04E-05 | 1816 | 0.333333 | 0.027958 | CADPS   |
| 18252.18 | 7.386721 | -7068 | 7.76E-05 | 1355 | 0.333333 | 0.019737 | TYRP1   |
| 5172.991 | 10.01921 | -7068 | 7.32E-05 | 537  | 0.333333 | 0.006356 | LY6G6C  |
| 19969.17 | 7.917957 | -7068 | 7.77E-05 | 1374 | 0.333333 | 0.02109  | TBC1D5  |
| 17320.27 | 9.167993 | -7068 | 7.62E-05 | 1102 | 0.333333 | 0.015092 | OPRD1   |
| 6486.634 | 7.755512 | -7068 | 7.44E-05 | 775  | 0.333333 | 0.010865 | CYP24A1 |
| 16428.25 | 7.223151 | -7068 | 7.71E-05 | 1296 | 0.333333 | 0.017344 | CYP27A1 |
| 11000.55 | 7.17658  | -7068 | 7.60E-05 | 1080 | 0.333333 | 0.015209 | TSPO    |
| 7987.785 | 8.324648 | -7068 | 7.46E-05 | 823  | 0.333333 | 0.011474 | ROS1    |
| 7137.087 | 12.3992  | -7068 | 7.34E-05 | 584  | 0.333333 | 0.007495 | ZNF35   |
| 10258.5  | 6.545213 | -7068 | 7.58E-05 | 1075 | 0.333333 | 0.01481  | EEF1E1  |
| 6018.82  | 7.714666 | -7068 | 7.41E-05 | 728  | 0.333333 | 0.009824 | TCN1    |
| 11328.72 | 6.334089 | -7068 | 7.63E-05 | 1189 | 0.333333 | 0.017533 | ARF4    |
| 5954.047 | 8.267661 | -7068 | 7.40E-05 | 698  | 0.333333 | 0.009193 | CRYAA   |
| 7659.83  | 7.232513 | -7068 | 7.50E-05 | 904  | 0.333333 | 0.013129 | PSEN2   |

|          |          |       |          |      |          |          |          |
|----------|----------|-------|----------|------|----------|----------|----------|
| 18723.88 | 6.896671 | -7068 | 7.77E-05 | 1429 | 0.333333 | 0.020594 | ID4      |
| 6269.486 | 8.078001 | -7068 | 7.37E-05 | 702  | 0.25     | 0.008489 | FABP1    |
| 6945.934 | 10.13462 | -7068 | 7.38E-05 | 655  | 0.333333 | 0.008847 | RFX2     |
| 9493.709 | 6.446886 | -7068 | 7.61E-05 | 1084 | 0.333333 | 0.01595  | COPS3    |
| 7989.464 | 7.239231 | -7068 | 7.50E-05 | 906  | 0.333333 | 0.01279  | HAX1     |
| 8967.684 | 9.245278 | -7068 | 7.45E-05 | 786  | 0.333333 | 0.010991 | CRYBA1   |
| 7504.086 | 6.440863 | -7068 | 7.50E-05 | 935  | 0.333333 | 0.012259 | CAD      |
| 12746.35 | 7.615841 | -7068 | 7.63E-05 | 1119 | 0.333333 | 0.016685 | DGKG     |
| 6799.992 | 6.591092 | -7068 | 7.52E-05 | 909  | 0.333333 | 0.014118 | BBX      |
| 9280.998 | 8.169764 | -7068 | 7.51E-05 | 900  | 0.333333 | 0.012718 | PPP2R5B  |
| 4994.259 | 8.474905 | -7068 | 7.36E-05 | 626  | 0.333333 | 0.008379 | CHGA     |
| 4257.956 | 8.511346 | -7068 | 7.33E-05 | 571  | 0.333333 | 0.007348 | GABRD    |
| 6522.995 | 6.338863 | -7068 | 7.51E-05 | 913  | 0.333333 | 0.014259 | BNIP2    |
| 20903.03 | 7.050972 | -7068 | 7.85E-05 | 1520 | 0.333333 | 0.023145 | STAC     |
| 8098.843 | 7.987918 | -7068 | 7.50E-05 | 850  | 0.333333 | 0.012301 | EVI2A    |
| 8781.652 | 8.882033 | -7068 | 7.46E-05 | 813  | 0.333333 | 0.011643 | ZNF146   |
| 20209.62 | 5.928254 | -7068 | 7.86E-05 | 1673 | 0.333333 | 0.02412  | TGFBR2   |
| 6025.591 | 5.619442 | -7068 | 7.48E-05 | 933  | 0.333333 | 0.012672 | PSMB7    |
| 7973.543 | 7.686204 | -7068 | 7.49E-05 | 875  | 0.333333 | 0.011972 | GPX1     |
| 5349.648 | 9.871654 | -7068 | 7.34E-05 | 577  | 0.333333 | 0.007707 | IL5      |
| 6695.701 | 5.265301 | -7068 | 7.50E-05 | 997  | 0.333333 | 0.01268  | PSMB5    |
| 7909.661 | 5.152324 | -7068 | 7.55E-05 | 1118 | 0.333333 | 0.014547 | RNPS1    |
| 11296.72 | 9.651595 | -7068 | 7.47E-05 | 830  | 0.333333 | 0.010282 | SLC5A2   |
| 7879.987 | 5.191397 | -7068 | 7.58E-05 | 1118 | 0.333333 | 0.016104 | DDX18    |
| 5707.977 | 10.99768 | -7068 | 7.33E-05 | 530  | 0.333333 | 0.00642  | TULP1    |
| 8193.888 | 7.26929  | -7068 | 7.54E-05 | 941  | 0.333333 | 0.014176 | SLC7A6   |
| 6305.138 | 6.737381 | -7068 | 7.45E-05 | 840  | 0.333333 | 0.011399 | FANCG    |
| 10278.44 | 6.742752 | -7068 | 7.60E-05 | 1101 | 0.333333 | 0.016451 | UNG      |
| 7240.876 | 5.230463 | -7068 | 7.51E-05 | 1013 | 0.333333 | 0.012927 | CASP1    |
| 12537.09 | 6.605157 | -7068 | 7.69E-05 | 1239 | 0.333333 | 0.018941 | MORF4L2  |
| 16399.51 | 6.582405 | -7068 | 7.70E-05 | 1354 | 0.333333 | 0.017492 | PROC     |
| 10337.19 | 6.681912 | -7068 | 7.61E-05 | 1116 | 0.333333 | 0.016401 | CEBPG    |
| 8089.425 | 6.206203 | -7068 | 7.54E-05 | 1014 | 0.333333 | 0.014773 | BMPR2    |
| 6866.527 | 8.208756 | -7068 | 7.43E-05 | 761  | 0.333333 | 0.009966 | EMD      |
| 14851.21 | 6.392197 | -7068 | 7.74E-05 | 1370 | 0.333333 | 0.020399 | SOX9     |
| 14266.74 | 5.733813 | -7068 | 7.72E-05 | 1409 | 0.333333 | 0.018958 | CDC7     |
| 8681.303 | 6.934581 | -7068 | 7.55E-05 | 989  | 0.333333 | 0.014757 | NEO1     |
| 10928.78 | 6.021408 | -7068 | 7.63E-05 | 1215 | 0.333333 | 0.017314 | ITGAV    |
| 7053.049 | 6.340238 | -7068 | 7.49E-05 | 901  | 0.333333 | 0.011899 | HLA-DPB1 |
| 7300.681 | 6.912279 | -7068 | 7.49E-05 | 885  | 0.333333 | 0.012408 | KNTC1    |
| 11879.51 | 7.889497 | -7068 | 7.55E-05 | 1046 | 0.333333 | 0.014486 | CCNH     |

|          |          |       |          |      |          |          |          |
|----------|----------|-------|----------|------|----------|----------|----------|
| 5851.751 | 8.634928 | -7068 | 7.37E-05 | 644  | 0.333333 | 0.0079   | LGALS4   |
| 6780.027 | 6.949862 | -7068 | 7.45E-05 | 842  | 0.333333 | 0.010698 | TRAF1    |
| 16717.16 | 7.15244  | -7068 | 7.72E-05 | 1335 | 0.333333 | 0.019516 | GRK5     |
| 9063.843 | 5.832841 | -7068 | 7.56E-05 | 1109 | 0.333333 | 0.014567 | BLM      |
| 5866.257 | 6.42219  | -7068 | 7.43E-05 | 819  | 0.333333 | 0.010817 | PRPF3    |
| 8147.89  | 5.376706 | -7068 | 7.59E-05 | 1132 | 0.333333 | 0.016631 | PSMD12   |
| 12709.31 | 5.516792 | -7068 | 7.71E-05 | 1387 | 0.333333 | 0.019459 | ACTN1    |
| 12343.39 | 6.104208 | -7068 | 7.68E-05 | 1291 | 0.333333 | 0.018623 | YWHAH    |
| 12975.48 | 7.583617 | -7068 | 7.59E-05 | 1101 | 0.333333 | 0.015783 | PSMD10   |
| 8732.368 | 8.28118  | -7068 | 7.49E-05 | 851  | 0.333333 | 0.012319 | IMPDH2   |
| 6641.435 | 7.847553 | -7068 | 7.44E-05 | 749  | 0.333333 | 0.009702 | NELFB    |
| 3902.324 | 5.575027 | -7068 | 7.42E-05 | 761  | 0.333333 | 0.011428 | GSPT1    |
| 24672.92 | 6.291128 | -7068 | 7.97E-05 | 1761 | 0.333333 | 0.026297 | XYLT1    |
| 13223.79 | 6.893859 | -7068 | 7.68E-05 | 1225 | 0.333333 | 0.01814  | RELN     |
| 10394.04 | 6.478308 | -7068 | 7.58E-05 | 1086 | 0.333333 | 0.014188 | POLR2E   |
| 8016.249 | 6.827836 | -7068 | 7.50E-05 | 950  | 0.333333 | 0.012616 | TNF      |
| 8031.116 | 8.498995 | -7068 | 7.45E-05 | 789  | 0.333333 | 0.010126 | GABARAP  |
| 7059.945 | 6.842841 | -7068 | 7.45E-05 | 866  | 0.333333 | 0.011008 | CD3E     |
| 13177.83 | 5.401417 | -7068 | 7.71E-05 | 1429 | 0.333333 | 0.019379 | ITGB1    |
| 21071.05 | 6.167218 | -7068 | 7.86E-05 | 1638 | 0.333333 | 0.022469 | SNRPB    |
| 11281.83 | 5.873777 | -7068 | 7.65E-05 | 1260 | 0.333333 | 0.018224 | IRS1     |
| 5114.414 | 7.017713 | -7068 | 7.42E-05 | 752  | 0.333333 | 0.01089  | UROD     |
| 11171.29 | 6.814613 | -7068 | 7.64E-05 | 1140 | 0.333333 | 0.017377 | LNPEP    |
| 5015.055 | 7.566795 | -7068 | 7.39E-05 | 677  | 0.333333 | 0.008621 | ARF5     |
| 7705.102 | 7.322489 | -7068 | 7.52E-05 | 902  | 0.333333 | 0.01311  | LASP1    |
| 5665.77  | 5.894588 | -7068 | 7.45E-05 | 848  | 0.333333 | 0.011352 | CCR1     |
| 10806.58 | 9.751606 | -7068 | 7.45E-05 | 789  | 0.333333 | 0.009545 | CRYBB1   |
| 6968.762 | 7.153816 | -7068 | 7.49E-05 | 864  | 0.333333 | 0.012988 | TRIP4    |
| 3099.024 | 7.115244 | -7068 | 7.34E-05 | 588  | 0.333333 | 0.008765 | SLC25A12 |
| 17528.82 | 7.13717  | -7068 | 7.77E-05 | 1377 | 0.333333 | 0.020357 | TFAP2C   |
| 8723.097 | 8.214149 | -7068 | 7.51E-05 | 882  | 0.333333 | 0.012803 | SUN2     |
| 15059.45 | 6.733289 | -7068 | 7.68E-05 | 1290 | 0.333333 | 0.017684 | CAMK2A   |
| 8052.743 | 11.93793 | -7068 | 7.35E-05 | 582  | 0.333333 | 0.006873 | CRYGC    |
| 5888.012 | 8.670495 | -7068 | 7.41E-05 | 695  | 0.333333 | 0.009941 | PRKAB2   |
| 34067.61 | 6.380749 | -7068 | 8.10E-05 | 2056 | 0.333333 | 0.029188 | DAPK1    |
| 10021.33 | 8.505043 | -7068 | 7.51E-05 | 898  | 0.333333 | 0.01235  | IMPDH1   |
| 13346.57 | 6.026062 | -7068 | 7.74E-05 | 1357 | 0.333333 | 0.02053  | TLK2     |
| 10860.47 | 9.103486 | -7068 | 7.50E-05 | 877  | 0.333333 | 0.011925 | PDE6A    |
| 9920.209 | 6.876113 | -7068 | 7.59E-05 | 1065 | 0.333333 | 0.016284 | TSC22D1  |
| 10494.88 | 6.449489 | -7068 | 7.64E-05 | 1153 | 0.333333 | 0.017447 | TXNRD1   |
| 19249.74 | 6.536625 | -7068 | 7.82E-05 | 1523 | 0.333333 | 0.021587 | YARS     |

|          |          |       |          |      |          |          |         |
|----------|----------|-------|----------|------|----------|----------|---------|
| 9777.271 | 7.063624 | -7068 | 7.57E-05 | 1031 | 0.333333 | 0.014753 | HINT1   |
| 5522.328 | 7.291489 | -7068 | 7.45E-05 | 769  | 0.333333 | 0.01198  | SACS    |
| 4097.202 | 7.068233 | -7068 | 7.37E-05 | 646  | 0.333333 | 0.008762 | ZNF593  |
| 4915.649 | 7.833867 | -7068 | 7.40E-05 | 684  | 0.333333 | 0.010446 | MFN1    |
| 8138.537 | 6.619185 | -7068 | 7.51E-05 | 967  | 0.333333 | 0.012985 | EIF5A   |
| 13767.96 | 6.255419 | -7068 | 7.72E-05 | 1352 | 0.333333 | 0.0199   | ACLY    |
| 23348.82 | 6.871935 | -7068 | 7.89E-05 | 1620 | 0.333333 | 0.024136 | SGMS1   |
| 7477.556 | 5.883763 | -7068 | 7.53E-05 | 1003 | 0.333333 | 0.013338 | IRF1    |
| 12673.8  | 6.301198 | -7068 | 7.69E-05 | 1282 | 0.333333 | 0.019211 | MEF2C   |
| 10165.53 | 6.916137 | -7068 | 7.58E-05 | 1073 | 0.333333 | 0.015422 | NFATC1  |
| 10857.78 | 6.088668 | -7068 | 7.65E-05 | 1201 | 0.333333 | 0.017089 | LAPTM5  |
| 10371.65 | 10.03459 | -7068 | 7.47E-05 | 805  | 0.333333 | 0.011501 | POU4F2  |
| 11018.29 | 7.518669 | -7068 | 7.59E-05 | 1060 | 0.333333 | 0.015766 | SIAH2   |
| 12528.17 | 6.571872 | -7068 | 7.68E-05 | 1238 | 0.333333 | 0.018818 | GNS     |
| 11177.03 | 6.994646 | -7068 | 7.59E-05 | 1096 | 0.333333 | 0.015576 | MNAT1   |
| 15114.49 | 6.487518 | -7068 | 7.74E-05 | 1358 | 0.333333 | 0.020528 | DYRK1A  |
| 7521.49  | 7.06274  | -7068 | 7.48E-05 | 872  | 0.333333 | 0.011313 | CTSA    |
| 28994.68 | 7.519309 | -7068 | 7.95E-05 | 1689 | 0.333333 | 0.02505  | MAML3   |
| 25146.83 | 7.569477 | -7068 | 7.87E-05 | 1563 | 0.333333 | 0.02343  | ANKS1A  |
| 8867.151 | 5.670205 | -7068 | 7.54E-05 | 1077 | 0.333333 | 0.013473 | SNRNP40 |
| 7330.128 | 6.746708 | -7068 | 7.49E-05 | 878  | 0.333333 | 0.011686 | PUF60   |
| 13592.06 | 6.478495 | -7068 | 7.70E-05 | 1297 | 0.333333 | 0.019461 | IL7     |
| 7744.831 | 8.818151 | -7068 | 7.45E-05 | 775  | 0.333333 | 0.010928 | PTH     |
| 5177.566 | 8.509428 | -7068 | 7.40E-05 | 670  | 0.333333 | 0.009853 | EYA3    |
| 8552.175 | 6.561939 | -7068 | 7.54E-05 | 1004 | 0.333333 | 0.01433  | HSPE1   |
| 5249.171 | 6.762906 | -7068 | 7.43E-05 | 777  | 0.333333 | 0.011576 | ATRX    |
| 3062.068 | 6.642845 | -7068 | 7.32E-05 | 588  | 0.333333 | 0.008524 | SMAD5   |
| 5572.806 | 8.625478 | -7068 | 7.39E-05 | 660  | 0.333333 | 0.009024 | CRMP1   |
| 8458.789 | 7.965525 | -7068 | 7.51E-05 | 883  | 0.333333 | 0.013007 | CFTR    |
| 4415.471 | 5.406973 | -7068 | 7.42E-05 | 785  | 0.333333 | 0.010279 | CD74    |
| 8067.625 | 6.270292 | -7068 | 7.55E-05 | 1011 | 0.333333 | 0.015205 | WWP1    |
| 15284.59 | 7.684141 | -7068 | 7.66E-05 | 1189 | 0.333333 | 0.016875 | CACNG3  |
| 5468.375 | 7.466313 | -7068 | 7.34E-05 | 640  | 0.333333 | 0.008002 | ZNF84   |
| 13552.92 | 6.279062 | -7068 | 7.68E-05 | 1305 | 0.333333 | 0.018732 | MAP2K4  |
| 9546.953 | 8.275223 | -7068 | 7.51E-05 | 902  | 0.333333 | 0.01211  | NR1H3   |
| 5978.412 | 6.555976 | -7068 | 7.49E-05 | 867  | 0.333333 | 0.013374 | ELF1    |
| 6189.619 | 7.701084 | -7068 | 7.44E-05 | 757  | 0.333333 | 0.010386 | REN     |
| 6948.895 | 8.775531 | -7068 | 7.42E-05 | 725  | 0.333333 | 0.009635 | PIK3R2  |
| 16863.57 | 6.546008 | -7068 | 7.79E-05 | 1440 | 0.333333 | 0.022079 | ROBO1   |
| 19399.8  | 7.231711 | -7068 | 7.79E-05 | 1430 | 0.333333 | 0.0206   | PINK1   |
| 13354.46 | 8.228211 | -7068 | 7.61E-05 | 1060 | 0.333333 | 0.014781 | SPINT2  |

|          |          |       |          |      |          |          |          |
|----------|----------|-------|----------|------|----------|----------|----------|
| 6864.525 | 8.551817 | -7068 | 7.42E-05 | 712  | 0.333333 | 0.008714 | CYP4F12  |
| 19380.56 | 7.434387 | -7068 | 7.78E-05 | 1398 | 0.333333 | 0.02061  | TIMP4    |
| 3762.361 | 4.953497 | -7068 | 7.38E-05 | 780  | 0.333333 | 0.010177 | RPS6     |
| 4180.485 | 7.010561 | -7068 | 7.39E-05 | 673  | 0.333333 | 0.010056 | BPTF     |
| 8440.808 | 8.303421 | -7068 | 7.47E-05 | 835  | 0.333333 | 0.011713 | GABRA6   |
| 10658.59 | 6.401913 | -7068 | 7.61E-05 | 1153 | 0.333333 | 0.015917 | FES      |
| 7598.914 | 7.303666 | -7068 | 7.51E-05 | 898  | 0.333333 | 0.013534 | P2RX5    |
| 18147.11 | 6.692857 | -7068 | 7.79E-05 | 1440 | 0.333333 | 0.020996 | BMP4     |
| 7595.445 | 7.457347 | -7068 | 7.48E-05 | 861  | 0.333333 | 0.011896 | ATP6V0A1 |
| 5740.769 | 7.947148 | -7068 | 7.40E-05 | 701  | 0.333333 | 0.009146 | ARL2     |
| 11077.87 | 6.357406 | -7068 | 7.66E-05 | 1195 | 0.333333 | 0.018731 | CHMP2B   |
| 10649.78 | 7.620443 | -7068 | 7.55E-05 | 1003 | 0.333333 | 0.01382  | SERPINA5 |
| 5825.526 | 5.997698 | -7068 | 7.45E-05 | 885  | 0.333333 | 0.011734 | ERBB2    |
| 18068.3  | 6.783421 | -7068 | 7.78E-05 | 1432 | 0.333333 | 0.02039  | NGFR     |
| 8933.481 | 7.553421 | -7068 | 7.52E-05 | 942  | 0.333333 | 0.013045 | FGFR4    |
| 8490.183 | 7.715942 | -7068 | 7.48E-05 | 880  | 0.333333 | 0.012427 | SCG2     |
| 8223.86  | 7.58617  | -7068 | 7.50E-05 | 892  | 0.333333 | 0.012347 | GSS      |
| 3061.507 | 7.140691 | -7068 | 7.33E-05 | 567  | 0.333333 | 0.007976 | TCF7     |
| 19436.33 | 6.592527 | -7068 | 7.83E-05 | 1514 | 0.333333 | 0.022318 | GPM6A    |
| 6356.927 | 9.829064 | -7068 | 7.35E-05 | 588  | 0.333333 | 0.006465 | CACNA1F  |
| 12915.71 | 6.810526 | -7068 | 7.62E-05 | 1181 | 0.333333 | 0.015458 | HSD17B10 |
| 6435.902 | 8.713026 | -7068 | 7.41E-05 | 719  | 0.333333 | 0.010897 | WSB1     |
| 9340.84  | 6.110539 | -7068 | 7.57E-05 | 1108 | 0.333333 | 0.015062 | STAT5A   |
| 20943.25 | 6.454786 | -7068 | 7.84E-05 | 1590 | 0.333333 | 0.022328 | NNT      |
| 26771.99 | 6.096664 | -7068 | 7.98E-05 | 1884 | 0.333333 | 0.02607  | HMGB1    |
| 8451.524 | 7.014433 | -7068 | 7.54E-05 | 957  | 0.333333 | 0.014335 | LUC7L3   |
| 4838.759 | 7.517152 | -7068 | 7.41E-05 | 703  | 0.333333 | 0.010159 | ALDH5A1  |
| 4553.365 | 6.8726   | -7068 | 7.40E-05 | 713  | 0.333333 | 0.010322 | IFIT1    |
| 24794.42 | 6.264514 | -7068 | 7.94E-05 | 1765 | 0.333333 | 0.025364 | SPARC    |
| 8135.333 | 7.863845 | -7068 | 7.48E-05 | 855  | 0.333333 | 0.01177  | CCKAR    |
| 3938.096 | 8.33653  | -7068 | 7.34E-05 | 566  | 0.333333 | 0.007522 | NUMA1    |
| 8221.562 | 7.782828 | -7068 | 7.48E-05 | 861  | 0.333333 | 0.011438 | MAG      |
| 9893.085 | 6.138674 | -7068 | 7.64E-05 | 1153 | 0.333333 | 0.017695 | RAB21    |
| 12278.73 | 6.14945  | -7068 | 7.63E-05 | 1251 | 0.333333 | 0.016712 | CASP8    |
| 3544.572 | 11.21677 | -7068 | 7.27E-05 | 435  | 0.333333 | 0.005632 | MC1R     |
| 8982.469 | 6.788628 | -7068 | 7.57E-05 | 1023 | 0.333333 | 0.01516  | RTN4     |
| 19061.19 | 6.792225 | -7068 | 7.75E-05 | 1474 | 0.333333 | 0.020087 | SP1      |
| 10009    | 7.150594 | -7068 | 7.51E-05 | 956  | 0.333333 | 0.010974 | APOC3    |
| 5671.14  | 6.331831 | -7068 | 7.45E-05 | 835  | 0.333333 | 0.011694 | POLR2K   |
| 14789.4  | 5.937599 | -7068 | 7.72E-05 | 1431 | 0.333333 | 0.020023 | YWHAB    |
| 5344.766 | 7.292547 | -7068 | 7.43E-05 | 737  | 0.333333 | 0.011248 | ZMYM2    |

|          |          |       |          |      |          |          |          |
|----------|----------|-------|----------|------|----------|----------|----------|
| 4378.985 | 7.433142 | -7068 | 7.36E-05 | 645  | 0.333333 | 0.008473 | COPS6    |
| 23061.35 | 8.412039 | -7068 | 7.78E-05 | 1369 | 0.333333 | 0.019082 | NOS1AP   |
| 9921.917 | 5.820187 | -7068 | 7.56E-05 | 1160 | 0.333333 | 0.014709 | AR       |
| 10864.08 | 6.496002 | -7068 | 7.59E-05 | 1110 | 0.333333 | 0.01507  | MNDA     |
| 12029.16 | 5.06584  | -7068 | 7.67E-05 | 1380 | 0.333333 | 0.01778  | RRM1     |
| 5237.538 | 6.637484 | -7068 | 7.44E-05 | 790  | 0.333333 | 0.01194  | RABEP1   |
| 9459.88  | 7.965677 | -7068 | 7.51E-05 | 917  | 0.333333 | 0.012991 | HSD3B1   |
| 6008.433 | 6.284043 | -7068 | 7.48E-05 | 889  | 0.333333 | 0.012382 | CCND3    |
| 5965.162 | 5.36346  | -7068 | 7.50E-05 | 960  | 0.333333 | 0.013791 | EIF2S1   |
| 6878.276 | 7.885728 | -7068 | 7.44E-05 | 790  | 0.333333 | 0.010776 | IL12B    |
| 18484.3  | 7.380961 | -7068 | 7.73E-05 | 1348 | 0.333333 | 0.017934 | BLVRB    |
| 15578.17 | 6.856245 | -7068 | 7.75E-05 | 1345 | 0.333333 | 0.020444 | ANXA4    |
| 6837.009 | 9.053178 | -7068 | 7.41E-05 | 705  | 0.333333 | 0.009234 | ACTR1B   |
| 10100.3  | 6.773033 | -7068 | 7.58E-05 | 1080 | 0.333333 | 0.015581 | SMAD7    |
| 6138.755 | 6.756134 | -7068 | 7.45E-05 | 828  | 0.333333 | 0.011846 | ISG15    |
| 8655.405 | 7.979046 | -7068 | 7.51E-05 | 900  | 0.333333 | 0.012904 | SLC3A2   |
| 7570.535 | 6.631262 | -7068 | 7.51E-05 | 938  | 0.333333 | 0.013226 | ADGRE5   |
| 13380.79 | 7.64592  | -7068 | 7.65E-05 | 1145 | 0.333333 | 0.017368 | UAP1     |
| 8144.729 | 7.253839 | -7068 | 7.49E-05 | 898  | 0.333333 | 0.01228  | TAF12    |
| 23869.57 | 6.516404 | -7068 | 7.86E-05 | 1648 | 0.333333 | 0.022161 | C8A      |
| 7311.783 | 6.477851 | -7068 | 7.54E-05 | 958  | 0.333333 | 0.014987 | TRIB2    |
| 18636.54 | 6.884751 | -7068 | 7.81E-05 | 1447 | 0.333333 | 0.021809 | FGF12    |
| 10454.61 | 8.649682 | -7068 | 7.51E-05 | 897  | 0.333333 | 0.012237 | PRPH     |
| 13580.55 | 6.059645 | -7068 | 7.70E-05 | 1345 | 0.333333 | 0.019236 | CLTC     |
| 10461.97 | 6.534525 | -7068 | 7.63E-05 | 1139 | 0.333333 | 0.017731 | LPGAT1   |
| 14624.59 | 7.559475 | -7068 | 7.67E-05 | 1199 | 0.333333 | 0.017989 | EZH1     |
| 5267.673 | 5.79597  | -7068 | 7.48E-05 | 869  | 0.333333 | 0.013055 | DDX46    |
| 7982.702 | 8.013613 | -7068 | 7.48E-05 | 844  | 0.333333 | 0.012246 | USP4     |
| 7498.443 | 5.099023 | -7068 | 7.54E-05 | 1081 | 0.333333 | 0.01358  | ITGB2    |
| 19609.44 | 6.713988 | -7068 | 7.84E-05 | 1533 | 0.333333 | 0.022442 | GCH1     |
| 10788.19 | 7.918828 | -7068 | 7.55E-05 | 976  | 0.333333 | 0.012886 | ATP6V0D1 |
| 25124.3  | 6.72067  | -7068 | 7.92E-05 | 1702 | 0.333333 | 0.024622 | VEGFC    |
| 5900.861 | 5.986875 | -7068 | 7.43E-05 | 847  | 0.333333 | 0.010569 | G6PC     |
| 16137.01 | 7.617764 | -7068 | 7.69E-05 | 1249 | 0.333333 | 0.018196 | MGLL     |
| 12201.36 | 7.460066 | -7068 | 7.62E-05 | 1121 | 0.333333 | 0.016663 | LDHB     |
| 3816.304 | 6.585607 | -7068 | 7.37E-05 | 665  | 0.333333 | 0.009451 | DDX42    |
| 5048.654 | 6.22986  | -7068 | 7.44E-05 | 812  | 0.333333 | 0.011875 | GTF2H1   |
| 8823.408 | 6.768808 | -7068 | 7.48E-05 | 922  | 0.333333 | 0.011608 | COX6B1   |
| 9539.571 | 7.230582 | -7068 | 7.55E-05 | 999  | 0.333333 | 0.01434  | FHL1     |
| 5562.441 | 7.349976 | -7068 | 7.42E-05 | 746  | 0.333333 | 0.010155 | GTF2H4   |
| 5533.635 | 7.370448 | -7068 | 7.41E-05 | 725  | 0.333333 | 0.009439 | ATP6V0B  |

|          |          |       |          |      |          |          |          |
|----------|----------|-------|----------|------|----------|----------|----------|
| 7453.865 | 7.646434 | -7068 | 7.49E-05 | 853  | 0.333333 | 0.012776 | SNAPC1   |
| 13030.75 | 8.028774 | -7068 | 7.61E-05 | 1088 | 0.333333 | 0.015816 | EDN2     |
| 15035.89 | 6.08148  | -7068 | 7.71E-05 | 1396 | 0.333333 | 0.019156 | ATP5O    |
| 4698.8   | 7.59662  | -7068 | 7.38E-05 | 659  | 0.333333 | 0.009674 | BET1     |
| 6273.744 | 8.032078 | -7068 | 7.41E-05 | 730  | 0.333333 | 0.009637 | PLXNB1   |
| 4892.533 | 8.546675 | -7068 | 7.37E-05 | 624  | 0.333333 | 0.008296 | ELAVL3   |
| 9350.311 | 7.281368 | -7068 | 7.55E-05 | 970  | 0.333333 | 0.013539 | SELP     |
| 13789.73 | 6.28013  | -7068 | 7.73E-05 | 1338 | 0.333333 | 0.020045 | IPO7     |
| 16396.24 | 5.5376   | -7068 | 7.73E-05 | 1511 | 0.333333 | 0.018486 | PLK1     |
| 16626.3  | 6.990822 | -7068 | 7.74E-05 | 1351 | 0.333333 | 0.019529 | TGFA     |
| 11286.76 | 6.328583 | -7068 | 7.66E-05 | 1199 | 0.333333 | 0.017906 | IFNGR1   |
| 7151.044 | 7.787858 | -7068 | 7.45E-05 | 792  | 0.333333 | 0.010448 | KRT1     |
| 16976.82 | 6.57326  | -7068 | 7.79E-05 | 1447 | 0.333333 | 0.022276 | SEL1L    |
| 12416.2  | 7.123756 | -7068 | 7.65E-05 | 1165 | 0.333333 | 0.017446 | NGF      |
| 6829.001 | 10.61493 | -7068 | 7.34E-05 | 603  | 0.333333 | 0.008028 | FABP2    |
| 9990.081 | 6.973172 | -7068 | 7.59E-05 | 1044 | 0.333333 | 0.015932 | DNAJB9   |
| 16512.21 | 6.630582 | -7068 | 7.75E-05 | 1400 | 0.333333 | 0.019679 | CTH      |
| 17856.44 | 6.259563 | -7068 | 7.82E-05 | 1525 | 0.333333 | 0.022551 | ITGA2    |
| 2882.316 | 6.833126 | -7068 | 7.33E-05 | 572  | 0.333333 | 0.0086   | CCP110   |
| 7060.958 | 9.466633 | -7068 | 7.42E-05 | 701  | 0.333333 | 0.009688 | CD1A     |
| 9330.67  | 8.852212 | -7068 | 7.49E-05 | 832  | 0.333333 | 0.010864 | RABGGTA  |
| 12675    | 7.184889 | -7068 | 7.65E-05 | 1157 | 0.333333 | 0.017359 | MED7     |
| 9740.799 | 8.621144 | -7068 | 7.50E-05 | 879  | 0.333333 | 0.012547 | SAG      |
| 6698.096 | 6.169765 | -7068 | 7.48E-05 | 907  | 0.333333 | 0.012213 | DDX23    |
| 5254.195 | 7.067355 | -7068 | 7.43E-05 | 751  | 0.333333 | 0.010731 | WNT2     |
| 7452.674 | 9.243626 | -7068 | 7.40E-05 | 708  | 0.333333 | 0.009273 | DUSP9    |
| 9934.622 | 8.716457 | -7068 | 7.50E-05 | 869  | 0.333333 | 0.011776 | ADH7     |
| 11647.61 | 7.218303 | -7068 | 7.61E-05 | 1111 | 0.333333 | 0.016014 | SEC13    |
| 9055.374 | 8.858783 | -7068 | 7.48E-05 | 832  | 0.333333 | 0.011681 | ZNF507   |
| 9590.531 | 7.072378 | -7068 | 7.55E-05 | 1023 | 0.333333 | 0.014035 | SMARCD1  |
| 4742.924 | 6.698877 | -7068 | 7.43E-05 | 747  | 0.333333 | 0.011597 | ATP6V1G1 |
| 5409.065 | 6.094915 | -7068 | 7.42E-05 | 841  | 0.333333 | 0.010601 | U2AF2    |
| 8406.263 | 6.823374 | -7068 | 7.53E-05 | 976  | 0.333333 | 0.014069 | CRYZ     |
| 15233.55 | 8.42961  | -7068 | 7.64E-05 | 1121 | 0.333333 | 0.015554 | EMP3     |
| 13911.45 | 7.00999  | -7068 | 7.67E-05 | 1233 | 0.333333 | 0.017329 | PTTG1    |
| 4095.709 | 5.193301 | -7068 | 7.42E-05 | 813  | 0.333333 | 0.011692 | EIF3A    |
| 6745.166 | 6.648105 | -7068 | 7.50E-05 | 896  | 0.333333 | 0.013345 | APBA2    |
| 10914.58 | 7.852106 | -7068 | 7.56E-05 | 996  | 0.333333 | 0.014089 | INHBB    |
| 10693.43 | 6.591882 | -7068 | 7.63E-05 | 1143 | 0.333333 | 0.017445 | MARCKS   |
| 8044.445 | 6.6857   | -7068 | 7.49E-05 | 896  | 0.333333 | 0.011343 | TYROBP   |
| 8265.098 | 7.201572 | -7068 | 7.52E-05 | 938  | 0.333333 | 0.013674 | HEXA     |

|          |          |       |          |      |          |          |          |
|----------|----------|-------|----------|------|----------|----------|----------|
| 10025.48 | 7.226197 | -7068 | 7.50E-05 | 981  | 0.333333 | 0.012298 | CD4      |
| 7608.853 | 8.379337 | -7068 | 7.45E-05 | 787  | 0.333333 | 0.010967 | SLC9A3R2 |
| 28769.22 | 6.582903 | -7068 | 7.97E-05 | 1839 | 0.333333 | 0.02587  | ID2      |
| 13671.22 | 6.514981 | -7068 | 7.69E-05 | 1281 | 0.333333 | 0.018664 | MAPK9    |
| 7716.777 | 7.304777 | -7068 | 7.48E-05 | 878  | 0.333333 | 0.011301 | ECH1     |
| 6263.992 | 7.856787 | -7068 | 7.41E-05 | 744  | 0.333333 | 0.009932 | PWP2     |
| 8149.569 | 7.006133 | -7068 | 7.54E-05 | 956  | 0.333333 | 0.014346 | PTPRA    |
| 27631.82 | 7.012318 | -7068 | 7.97E-05 | 1744 | 0.333333 | 0.025452 | CYP19A1  |
| 7795.911 | 7.471571 | -7068 | 7.48E-05 | 874  | 0.333333 | 0.012416 | NLRP1    |
| 17278.25 | 7.886532 | -7068 | 7.69E-05 | 1251 | 0.333333 | 0.017261 | FCGRT    |
| 3791.244 | 6.256316 | -7068 | 7.36E-05 | 684  | 0.333333 | 0.008862 | CASP9    |
| 6504.984 | 6.818153 | -7068 | 7.44E-05 | 820  | 0.333333 | 0.010206 | ATP5D    |
| 13496.9  | 6.341377 | -7068 | 7.61E-05 | 1219 | 0.333333 | 0.014804 | SERPINC1 |
| 18924.55 | 10.08354 | -7068 | 7.59E-05 | 1052 | 0.333333 | 0.014217 | ADRA1D   |
| 16410.69 | 4.804452 | -7068 | 7.79E-05 | 1694 | 0.333333 | 0.021832 | STAT3    |
| 9163.971 | 6.213471 | -7068 | 7.57E-05 | 1076 | 0.333333 | 0.015517 | SRP72    |
| 8230.846 | 6.521164 | -7068 | 7.53E-05 | 975  | 0.333333 | 0.013619 | CXCL9    |
| 16023.3  | 6.874641 | -7068 | 7.68E-05 | 1296 | 0.333333 | 0.016512 | APCS     |
| 7530.019 | 6.778674 | -7068 | 7.43E-05 | 843  | 0.333333 | 0.00956  | SERPINA7 |
| 20859.08 | 7.704413 | -7068 | 7.78E-05 | 1416 | 0.333333 | 0.021655 | RABGAP1L |
| 6145.252 | 7.903559 | -7068 | 7.44E-05 | 755  | 0.333333 | 0.010954 | RAMP1    |
| 11540.86 | 6.716427 | -7068 | 7.66E-05 | 1169 | 0.333333 | 0.017588 | GABRB3   |
| 9471.696 | 6.729391 | -7068 | 7.59E-05 | 1069 | 0.333333 | 0.016199 | PIP5K1A  |
| 11489.58 | 6.84566  | -7068 | 7.64E-05 | 1149 | 0.333333 | 0.01716  | LIPA     |
| 9525.311 | 6.451777 | -7068 | 7.60E-05 | 1089 | 0.333333 | 0.015866 | CSRP1    |
| 6249.603 | 6.091147 | -7068 | 7.48E-05 | 872  | 0.333333 | 0.012673 | EXOSC8   |
| 11241.71 | 8.202224 | -7068 | 7.56E-05 | 963  | 0.333333 | 0.013068 | SLC25A1  |
| 6800.74  | 6.043618 | -7068 | 7.54E-05 | 959  | 0.333333 | 0.014807 | CNIH1    |
| 7326.863 | 9.633347 | -7068 | 7.40E-05 | 677  | 0.333333 | 0.008994 | SIX6     |
| 8652.67  | 7.453762 | -7068 | 7.50E-05 | 925  | 0.333333 | 0.012925 | CALM1    |
| 8211.952 | 6.813415 | -7068 | 7.52E-05 | 951  | 0.333333 | 0.013047 | RANGAP1  |
| 19822.4  | 6.279811 | -7068 | 7.89E-05 | 1609 | 0.333333 | 0.024569 | FOXN3    |
| 8565.944 | 6.775436 | -7068 | 7.51E-05 | 958  | 0.333333 | 0.012705 | POLR2H   |
| 11094.29 | 7.519915 | -7068 | 7.59E-05 | 1046 | 0.333333 | 0.015368 | RYR1     |
| 9464.79  | 6.389439 | -7068 | 7.58E-05 | 1087 | 0.333333 | 0.015032 | PRKCD    |
| 10329.27 | 8.495489 | -7068 | 7.50E-05 | 883  | 0.333333 | 0.011405 | PAX7     |
| 8705.325 | 9.020503 | -7068 | 7.46E-05 | 789  | 0.333333 | 0.010856 | RPE65    |
| 8916.437 | 6.511046 | -7068 | 7.57E-05 | 1043 | 0.333333 | 0.015917 | ADAM10   |
| 7883.506 | 5.932266 | -7068 | 7.59E-05 | 1062 | 0.333333 | 0.016549 | PRKAR1A  |
| 5515.627 | 5.568177 | -7068 | 7.45E-05 | 850  | 0.333333 | 0.011172 | ATP5F1   |
| 13374.14 | 6.491558 | -7068 | 7.65E-05 | 1258 | 0.333333 | 0.017585 | NCOA2    |



|          |          |       |          |      |          |          |          |
|----------|----------|-------|----------|------|----------|----------|----------|
| 10027.46 | 10.46863 | -7068 | 7.45E-05 | 774  | 0.333333 | 0.010509 | MAST1    |
| 9810.29  | 9.170971 | -7068 | 7.47E-05 | 794  | 0.333333 | 0.009403 | FOXN1    |
| 15395    | 6.338398 | -7068 | 7.75E-05 | 1412 | 0.333333 | 0.020073 | MAPKAPK3 |
| 4691.689 | 7.609093 | -7068 | 7.39E-05 | 668  | 0.333333 | 0.009215 | PIP5K1C  |
| 14462.1  | 6.746301 | -7068 | 7.72E-05 | 1304 | 0.333333 | 0.019678 | WASF2    |
| 18448.51 | 6.586003 | -7068 | 7.76E-05 | 1450 | 0.333333 | 0.019611 | ATP5B    |
| 5286.553 | 6.845363 | -7068 | 7.41E-05 | 736  | 0.333333 | 0.009334 | GYS2     |
| 12820.12 | 6.865709 | -7068 | 7.68E-05 | 1221 | 0.333333 | 0.018374 | CD58     |
| 7956.523 | 7.389344 | -7068 | 7.52E-05 | 909  | 0.333333 | 0.013929 | DEGS1    |
| 9199.534 | 7.703491 | -7068 | 7.53E-05 | 933  | 0.333333 | 0.012819 | ALPL     |
| 10633.41 | 11.4304  | -7068 | 7.41E-05 | 688  | 0.333333 | 0.007805 | CCL1     |
| 7701.384 | 7.687078 | -7068 | 7.49E-05 | 855  | 0.333333 | 0.01156  | NR1H2    |
| 9901.66  | 6.913465 | -7068 | 7.56E-05 | 1039 | 0.333333 | 0.015562 | ENC1     |
| 4707.452 | 9.287869 | -7068 | 7.35E-05 | 571  | 0.333333 | 0.007671 | GAL3ST1  |
| 29028.01 | 6.567059 | -7068 | 8.04E-05 | 1875 | 0.333333 | 0.028135 | PRKG1    |
| 8836.09  | 5.914102 | -7068 | 7.57E-05 | 1100 | 0.333333 | 0.015634 | IL6ST    |
| 11424.06 | 7.1887   | -7068 | 7.60E-05 | 1076 | 0.333333 | 0.01474  | SRM      |
| 7374.478 | 8.501866 | -7068 | 7.37E-05 | 707  | 0.333333 | 0.007638 | ELANE    |
| 4332.277 | 6.505144 | -7068 | 7.42E-05 | 742  | 0.333333 | 0.011731 | ST13     |
| 10936.07 | 6.309836 | -7068 | 7.60E-05 | 1157 | 0.333333 | 0.015635 | ITGA5    |
| 8605.303 | 6.048405 | -7068 | 7.57E-05 | 1055 | 0.333333 | 0.015481 | TMED10   |
| 5234.303 | 8.53239  | -7068 | 7.36E-05 | 628  | 0.333333 | 0.008061 | GPR37L1  |
| 7870.614 | 7.598761 | -7068 | 7.51E-05 | 878  | 0.333333 | 0.012724 | PLD3     |
| 17278.28 | 6.682012 | -7068 | 7.73E-05 | 1397 | 0.333333 | 0.018691 | LIPC     |
| 6735.134 | 6.39686  | -7068 | 7.48E-05 | 888  | 0.333333 | 0.012199 | FYB      |
| 14289.06 | 6.611262 | -7068 | 7.70E-05 | 1306 | 0.333333 | 0.018909 | ALOX5    |
| 5502.139 | 6.688522 | -7068 | 7.45E-05 | 804  | 0.333333 | 0.012478 | IBTK     |
| 12958.71 | 9.785697 | -7068 | 7.53E-05 | 925  | 0.333333 | 0.012417 | XRCC3    |
| 5941.953 | 8.433155 | -7068 | 7.40E-05 | 694  | 0.333333 | 0.009524 | ARHGEF16 |
| 7455.287 | 6.73131  | -7068 | 7.52E-05 | 927  | 0.333333 | 0.014146 | RNF6     |
| 13110.56 | 6.113148 | -7068 | 7.71E-05 | 1336 | 0.333333 | 0.019793 | PAK2     |
| 6624.735 | 7.574071 | -7068 | 7.46E-05 | 807  | 0.333333 | 0.012196 | TDP2     |
| 8421.472 | 7.251388 | -7068 | 7.52E-05 | 941  | 0.333333 | 0.013158 | CTSD     |
| 17866.45 | 6.336287 | -7068 | 7.83E-05 | 1504 | 0.333333 | 0.022841 | RAPGEF2  |
| 26106.03 | 8.069003 | -7068 | 7.86E-05 | 1519 | 0.333333 | 0.02292  | PDHA2    |
| 13694.26 | 6.601508 | -7068 | 7.64E-05 | 1231 | 0.333333 | 0.016073 | ITGAM    |
| 15579.6  | 6.224511 | -7068 | 7.79E-05 | 1434 | 0.333333 | 0.022028 | PRKD1    |
| 6717.481 | 9.080893 | -7068 | 7.41E-05 | 685  | 0.333333 | 0.009204 | KRT20    |
| 5453.822 | 7.123813 | -7068 | 7.42E-05 | 733  | 0.333333 | 0.00923  | MAN2B1   |
| 5224.684 | 7.434382 | -7068 | 7.40E-05 | 714  | 0.333333 | 0.009675 | LIG1     |
| 11222.68 | 10.67499 | -7068 | 7.42E-05 | 729  | 0.333333 | 0.008529 | RCVRN    |

|          |          |       |          |      |          |          |          |
|----------|----------|-------|----------|------|----------|----------|----------|
| 7840.255 | 8.229543 | -7068 | 7.47E-05 | 813  | 0.333333 | 0.011003 | CST3     |
| 6229.774 | 8.152567 | -7068 | 7.42E-05 | 732  | 0.333333 | 0.009938 | ERP29    |
| 9023.19  | 7.198628 | -7068 | 7.56E-05 | 984  | 0.333333 | 0.014077 | ARPC1B   |
| 1375.181 | 4.505423 | -7068 | 7.26E-05 | 499  | 0.333333 | 0.006662 | NACA     |
| 13842.52 | 6.357189 | -7068 | 7.72E-05 | 1331 | 0.333333 | 0.019344 | RBBP8    |
| 14567.06 | 7.581631 | -7068 | 7.67E-05 | 1205 | 0.333333 | 0.017486 | MCC      |
| 8007.215 | 6.191757 | -7068 | 7.49E-05 | 952  | 0.333333 | 0.011468 | CYP2C9   |
| 5758.116 | 5.739719 | -7068 | 7.46E-05 | 904  | 0.333333 | 0.011785 | RAF1     |
| 7185.821 | 7.573038 | -7068 | 7.46E-05 | 828  | 0.333333 | 0.011408 | MYO1C    |
| 9450.466 | 7.825052 | -7068 | 7.53E-05 | 939  | 0.333333 | 0.01385  | PRKAG1   |
| 10272.47 | 6.223813 | -7068 | 7.58E-05 | 1128 | 0.333333 | 0.015112 | H2AFX    |
| 11078.37 | 7.147697 | -7068 | 7.63E-05 | 1108 | 0.333333 | 0.017056 | CCDC86   |
| 4176.366 | 6.053847 | -7068 | 7.37E-05 | 713  | 0.333333 | 0.00904  | ITK      |
| 6182.652 | 6.850039 | -7068 | 7.48E-05 | 853  | 0.333333 | 0.013219 | FNTA     |
| 10315.68 | 5.76243  | -7068 | 7.61E-05 | 1181 | 0.333333 | 0.015994 | CDH5     |
| 15070.29 | 6.73031  | -7068 | 7.73E-05 | 1323 | 0.333333 | 0.019648 | AIMP2    |
| 6847.306 | 8.249369 | -7068 | 7.44E-05 | 765  | 0.333333 | 0.011468 | SERPINI1 |
| 8450.006 | 6.477944 | -7068 | 7.54E-05 | 1015 | 0.333333 | 0.014676 | RANBP2   |
| 7906.363 | 6.194774 | -7068 | 7.51E-05 | 982  | 0.333333 | 0.012903 | PSMC5    |
| 6929.146 | 6.460265 | -7068 | 7.50E-05 | 912  | 0.333333 | 0.013781 | ARL1     |
| 7795.124 | 7.899235 | -7068 | 7.46E-05 | 815  | 0.333333 | 0.010238 | ATP6V1B1 |
| 4840.099 | 8.718537 | -7068 | 7.36E-05 | 607  | 0.333333 | 0.008189 | PDYN     |
| 13210.44 | 7.573186 | -7068 | 7.67E-05 | 1165 | 0.333333 | 0.018389 | CACNA1E  |
| 5335.08  | 7.852294 | -7068 | 7.41E-05 | 703  | 0.333333 | 0.010412 | KCNH2    |
| 30266.19 | 6.093969 | -7068 | 8.08E-05 | 2009 | 0.333333 | 0.029324 | IQGAP2   |
| 8984.214 | 7.274391 | -7068 | 7.54E-05 | 968  | 0.333333 | 0.014228 | NMI      |
| 23405.9  | 6.946602 | -7068 | 7.84E-05 | 1577 | 0.333333 | 0.021687 | CTSK     |
| 6768.157 | 7.616245 | -7068 | 7.48E-05 | 831  | 0.333333 | 0.012918 | OXCT1    |
| 4107.195 | 9.415604 | -7068 | 7.32E-05 | 535  | 0.333333 | 0.00764  | ZSCAN26  |
| 6531.188 | 6.964027 | -7068 | 7.48E-05 | 848  | 0.333333 | 0.013    | KDM5B    |
| 6747.058 | 7.697796 | -7068 | 7.43E-05 | 789  | 0.333333 | 0.010607 | CYP4B1   |
| 3617.574 | 7.860721 | -7068 | 7.33E-05 | 571  | 0.333333 | 0.007558 | DFFA     |
| 4020.394 | 8.06942  | -7068 | 7.34E-05 | 579  | 0.333333 | 0.007438 | CDK2AP2  |
| 5580.706 | 6.440062 | -7068 | 7.45E-05 | 830  | 0.333333 | 0.012286 | ATP6V1A  |
| 14661.11 | 6.839351 | -7068 | 7.71E-05 | 1293 | 0.333333 | 0.019189 | BMP7     |
| 7279.514 | 8.37515  | -7068 | 7.43E-05 | 754  | 0.333333 | 0.00996  | TGM3     |
| 19205.34 | 7.237246 | -7068 | 7.78E-05 | 1427 | 0.333333 | 0.020407 | CRADD    |
| 13790.04 | 6.782217 | -7068 | 7.68E-05 | 1261 | 0.333333 | 0.018251 | VLDLR    |
| 8996.574 | 7.671614 | -7068 | 7.52E-05 | 926  | 0.333333 | 0.013355 | PDGFRL   |
| 7219.852 | 9.722353 | -7068 | 7.40E-05 | 692  | 0.333333 | 0.009077 | CCR9     |
| 8491.423 | 7.935038 | -7068 | 7.50E-05 | 875  | 0.333333 | 0.012441 | BHMT     |

|          |          |       |          |      |          |          |         |
|----------|----------|-------|----------|------|----------|----------|---------|
| 4929.915 | 7.387491 | -7068 | 7.41E-05 | 721  | 0.333333 | 0.010716 | ACE     |
| 8741.735 | 6.90762  | -7068 | 7.56E-05 | 1004 | 0.333333 | 0.015272 | F2R     |
| 4848.203 | 6.858792 | -7068 | 7.42E-05 | 736  | 0.333333 | 0.010922 | ALG8    |
| 16261.22 | 6.442413 | -7068 | 7.76E-05 | 1428 | 0.333333 | 0.020879 | ANXA5   |
| 12139.75 | 8.098136 | -7068 | 7.58E-05 | 1033 | 0.333333 | 0.01485  | THY1    |
| 3328.651 | 6.307008 | -7068 | 7.38E-05 | 650  | 0.333333 | 0.010396 | IMPA1   |
| 12619.27 | 8.198343 | -7068 | 7.59E-05 | 1044 | 0.333333 | 0.014541 | ONECUT1 |
| 22967.51 | 6.685597 | -7068 | 7.90E-05 | 1655 | 0.333333 | 0.024313 | TXN     |
| 6926.882 | 6.624699 | -7068 | 7.51E-05 | 921  | 0.333333 | 0.013878 | IDE     |
| 7446.74  | 10.24659 | -7068 | 7.38E-05 | 634  | 0.333333 | 0.008137 | FGF6    |
| 6032.292 | 7.892689 | -7068 | 7.39E-05 | 724  | 0.333333 | 0.008824 | ENO3    |
| 15049.51 | 7.763918 | -7068 | 7.63E-05 | 1166 | 0.333333 | 0.015617 | JUP     |
| 3853.358 | 8.644975 | -7068 | 7.33E-05 | 567  | 0.333333 | 0.008231 | GNRH1   |
| 8989.95  | 7.211194 | -7068 | 7.55E-05 | 980  | 0.333333 | 0.0142   | VASP    |
| 6811.038 | 7.66703  | -7068 | 7.44E-05 | 790  | 0.333333 | 0.010707 | DSG1    |
| 4103.221 | 7.555787 | -7068 | 7.36E-05 | 629  | 0.333333 | 0.008918 | GSTM3   |
| 9742.701 | 6.495807 | -7068 | 7.59E-05 | 1094 | 0.333333 | 0.016095 | CALU    |
| 11009.22 | 7.233708 | -7068 | 7.63E-05 | 1099 | 0.333333 | 0.016745 | OSTF1   |
| 4198.347 | 8.575397 | -7068 | 7.36E-05 | 605  | 0.333333 | 0.00933  | PPP3CC  |
| 33216.13 | 6.511006 | -7068 | 8.07E-05 | 1988 | 0.333333 | 0.028945 | PBX1    |
| 2989.677 | 6.719275 | -7068 | 7.34E-05 | 588  | 0.333333 | 0.008424 | ACYP1   |
| 13336.13 | 6.515533 | -7068 | 7.66E-05 | 1266 | 0.333333 | 0.018398 | HIF1A   |
| 10698.69 | 6.55478  | -7068 | 7.58E-05 | 1119 | 0.333333 | 0.014858 | PSMB8   |
| 10217.49 | 6.936874 | -7068 | 7.57E-05 | 1056 | 0.333333 | 0.014474 | CD63    |
| 8096.128 | 6.89621  | -7068 | 7.52E-05 | 940  | 0.333333 | 0.01382  | GBAS    |
| 5006.011 | 5.362536 | -7068 | 7.48E-05 | 896  | 0.333333 | 0.013688 | BCLAF1  |
| 4353.479 | 7.548532 | -7068 | 7.37E-05 | 649  | 0.25     | 0.009416 | ENPP4   |
| 5473.8   | 7.342571 | -7068 | 7.44E-05 | 751  | 0.333333 | 0.01102  | UBE2G2  |
| 9022.724 | 6.672629 | -7068 | 7.50E-05 | 977  | 0.333333 | 0.012854 | NDUFS4  |
| 8359.914 | 9.545179 | -7068 | 7.40E-05 | 716  | 0.333333 | 0.00852  | AGER    |
| 5529.094 | 8.028284 | -7068 | 7.40E-05 | 692  | 0.333333 | 0.009099 | DIO1    |
| 9805.441 | 7.31767  | -7068 | 7.58E-05 | 1022 | 0.333333 | 0.015206 | EDEM1   |
| 5236.863 | 9.40087  | -7068 | 7.35E-05 | 598  | 0.333333 | 0.007906 | POU1F1  |
| 5669.167 | 8.055753 | -7068 | 7.40E-05 | 702  | 0.333333 | 0.009443 | EHMT2   |
| 6575.368 | 7.114133 | -7068 | 7.44E-05 | 805  | 0.333333 | 0.010161 | CPN1    |
| 6203.577 | 9.920775 | -7068 | 7.36E-05 | 616  | 0.333333 | 0.008059 | NINL    |
| 23073.54 | 6.709706 | -7068 | 7.90E-05 | 1660 | 0.333333 | 0.024356 | ADK     |
| 3562.672 | 7.787351 | -7068 | 7.34E-05 | 573  | 0.333333 | 0.008139 | PAF1    |
| 7933.534 | 6.965042 | -7068 | 7.49E-05 | 913  | 0.333333 | 0.012086 | COX7A1  |
| 6641.35  | 8.664521 | -7068 | 7.41E-05 | 716  | 0.333333 | 0.009474 | SLC13A2 |
| 10307.39 | 8.005975 | -7068 | 7.55E-05 | 959  | 0.333333 | 0.013777 | ADTRP   |

|          |          |       |          |      |          |          |          |
|----------|----------|-------|----------|------|----------|----------|----------|
| 8727.451 | 8.490639 | -7068 | 7.49E-05 | 847  | 0.333333 | 0.012475 | MLLT11   |
| 3892.713 | 6.345818 | -7068 | 7.41E-05 | 720  | 0.333333 | 0.011241 | MAT2A    |
| 4229.612 | 7.170128 | -7068 | 7.38E-05 | 675  | 0.333333 | 0.009863 | ARHGEF2  |
| 5660.218 | 7.44055  | -7068 | 7.44E-05 | 761  | 0.25     | 0.011722 | CD200    |
| 9848.848 | 6.821221 | -7068 | 7.57E-05 | 1051 | 0.333333 | 0.015004 | SGCG     |
| 11567.79 | 9.090695 | -7068 | 7.52E-05 | 909  | 0.333333 | 0.012013 | SLC9A3R1 |
| 5180.954 | 6.293383 | -7068 | 7.43E-05 | 789  | 0.333333 | 0.010564 | DDOST    |
| 9103.4   | 6.439625 | -7068 | 7.58E-05 | 1066 | 0.333333 | 0.015971 | SPEN     |
| 10867.04 | 6.16782  | -7068 | 7.63E-05 | 1160 | 0.333333 | 0.016086 | FCER1G   |
| 6264.733 | 6.386694 | -7068 | 7.50E-05 | 904  | 0.333333 | 0.01337  | BTF3     |
| 8287.927 | 5.850909 | -7068 | 7.58E-05 | 1075 | 0.333333 | 0.015422 | SLC25A5  |
| 12626.82 | 6.492365 | -7068 | 7.63E-05 | 1203 | 0.333333 | 0.016267 | MYD88    |
| 9203.012 | 7.799372 | -7068 | 7.52E-05 | 927  | 0.333333 | 0.013454 | TSHR     |
| 10218.73 | 5.310747 | -7068 | 7.61E-05 | 1268 | 0.333333 | 0.017023 | RB1      |
| 6886.591 | 7.120404 | -7068 | 7.44E-05 | 807  | 0.333333 | 0.010209 | SERPINA6 |
| 8901.344 | 9.126983 | -7068 | 7.47E-05 | 819  | 0.333333 | 0.011333 | XRCC2    |
| 6160.401 | 7.320362 | -7068 | 7.45E-05 | 779  | 0.333333 | 0.011617 | TOPORS   |
| 8450.308 | 12.36128 | -7068 | 7.34E-05 | 556  | 0.333333 | 0.006211 | CHRND    |
| 24636.67 | 7.00618  | -7068 | 7.92E-05 | 1656 | 0.333333 | 0.024401 | RREB1    |
| 6281.935 | 6.280962 | -7068 | 7.46E-05 | 875  | 0.333333 | 0.011924 | DES      |
| 4234.937 | 8.880731 | -7068 | 7.33E-05 | 552  | 0.333333 | 0.006783 | GCK      |
| 7750.977 | 5.765732 | -7068 | 7.53E-05 | 1033 | 0.333333 | 0.01419  | HSPA5    |
| 7921.763 | 7.682273 | -7068 | 7.45E-05 | 804  | 0.333333 | 0.009578 | KRT13    |
| 3882.875 | 7.584722 | -7068 | 7.34E-05 | 586  | 0.333333 | 0.007796 | EIF2B4   |
| 9632.61  | 6.204744 | -7068 | 7.61E-05 | 1124 | 0.333333 | 0.017238 | DICER1   |
| 5999.998 | 7.895032 | -7068 | 7.43E-05 | 748  | 0.333333 | 0.01072  | GPKOW    |
| 4779.392 | 9.597654 | -7068 | 7.33E-05 | 552  | 0.333333 | 0.006996 | PMEL     |
| 9660.396 | 6.618619 | -7068 | 7.54E-05 | 1034 | 0.333333 | 0.013483 | ARG1     |
| 4481.985 | 8.319563 | -7068 | 7.36E-05 | 614  | 0.333333 | 0.00826  | GAA      |
| 6462.956 | 8.32688  | -7068 | 7.42E-05 | 723  | 0.333333 | 0.009673 | GPR143   |
| 3768.815 | 7.075786 | -7068 | 7.36E-05 | 612  | 0.333333 | 0.009061 | GABPA    |
| 8842.958 | 7.998832 | -7068 | 7.49E-05 | 893  | 0.333333 | 0.012956 | ID3      |
| 11352.45 | 6.986192 | -7068 | 7.63E-05 | 1135 | 0.333333 | 0.016947 | VAV2     |
| 13855.62 | 5.649014 | -7068 | 7.73E-05 | 1416 | 0.333333 | 0.020154 | SF3B1    |
| 10255.87 | 6.580109 | -7068 | 7.60E-05 | 1099 | 0.333333 | 0.015668 | CSF1R    |
| 11854.93 | 10.70658 | -7068 | 7.50E-05 | 872  | 0.333333 | 0.012753 | ASH2L    |
| 6569.218 | 7.02727  | -7068 | 7.48E-05 | 852  | 0.333333 | 0.012596 | PIK3C2B  |
| 22392.48 | 7.28767  | -7068 | 7.87E-05 | 1552 | 0.333333 | 0.023829 | CUX1     |
| 6616.2   | 8.947921 | -7068 | 7.40E-05 | 671  | 0.333333 | 0.008704 | KRT76    |
| 4101.478 | 7.249616 | -7068 | 7.38E-05 | 666  | 0.333333 | 0.009706 | BCAT2    |
| 26259.47 | 6.925699 | -7068 | 7.96E-05 | 1710 | 0.333333 | 0.0254   | DCLK1    |

|          |          |       |          |      |          |          |          |
|----------|----------|-------|----------|------|----------|----------|----------|
| 20300.54 | 9.252657 | -7068 | 7.68E-05 | 1234 | 0.333333 | 0.018423 | SDCBP    |
| 7754.621 | 5.672309 | -7068 | 7.55E-05 | 1044 | 0.333333 | 0.014989 | CNN1     |
| 2666.983 | 6.840989 | -7068 | 7.32E-05 | 543  | 0.333333 | 0.0081   | WDR43    |
| 15772.42 | 5.983963 | -7068 | 7.80E-05 | 1486 | 0.333333 | 0.022656 | PPP2R5C  |
| 9377.171 | 8.458964 | -7068 | 7.50E-05 | 880  | 0.333333 | 0.012075 | MVP      |
| 6952.303 | 3.415585 | -7068 | 7.55E-05 | 1268 | 0.333333 | 0.014167 | RFC4     |
| 4438.954 | 9.841634 | -7068 | 7.32E-05 | 524  | 0.333333 | 0.007061 | RRH      |
| 9589.413 | 9.024582 | -7068 | 7.45E-05 | 792  | 0.333333 | 0.010816 | NDUFB5   |
| 4664.518 | 7.060462 | -7068 | 7.41E-05 | 722  | 0.333333 | 0.01117  | IFRD1    |
| 12140.34 | 7.405495 | -7068 | 7.61E-05 | 1099 | 0.333333 | 0.015738 | CA2      |
| 4120.123 | 8.361183 | -7068 | 7.32E-05 | 556  | 0.333333 | 0.007246 | TFF1     |
| 12838.78 | 7.093352 | -7068 | 7.67E-05 | 1197 | 0.333333 | 0.018154 | CKAP4    |
| 8652.973 | 5.59993  | -7068 | 7.57E-05 | 1129 | 0.333333 | 0.01549  | JAK1     |
| 5882.031 | 5.77339  | -7068 | 7.50E-05 | 930  | 0.333333 | 0.014098 | G3BP1    |
| 6731.661 | 8.55738  | -7068 | 7.42E-05 | 742  | 0.333333 | 0.011194 | RSRP1    |
| 15470.03 | 7.248227 | -7068 | 7.73E-05 | 1288 | 0.333333 | 0.019619 | GPD1L    |
| 7680.276 | 8.301889 | -7068 | 7.46E-05 | 807  | 0.333333 | 0.011398 | ZNF592   |
| 6323.297 | 6.800548 | -7068 | 7.45E-05 | 836  | 0.333333 | 0.011292 | PLA2G2A  |
| 6918.254 | 6.804552 | -7068 | 7.44E-05 | 848  | 0.333333 | 0.010882 | B2M      |
| 13696.07 | 7.529843 | -7068 | 7.63E-05 | 1144 | 0.333333 | 0.015866 | IRF6     |
| 5828.349 | 7.140718 | -7068 | 7.44E-05 | 792  | 0.333333 | 0.011401 | CCNT1    |
| 5022.498 | 7.308607 | -7068 | 7.41E-05 | 709  | 0.333333 | 0.010165 | TRAF3IP3 |
| 3111.708 | 8.261743 | -7068 | 7.32E-05 | 531  | 0.333333 | 0.008035 | PCNX4    |
| 6674.021 | 7.144816 | -7068 | 7.49E-05 | 850  | 0.333333 | 0.012537 | TNPO3    |
| 4263.601 | 8.544215 | -7068 | 7.35E-05 | 579  | 0.333333 | 0.007575 | NDUFAF3  |
| 6851.505 | 9.070104 | -7068 | 7.43E-05 | 722  | 0.333333 | 0.010159 | LETMD1   |
| 7106.96  | 7.648966 | -7068 | 7.46E-05 | 816  | 0.333333 | 0.011479 | ATP7B    |
| 4312.099 | 7.589717 | -7068 | 7.37E-05 | 634  | 0.333333 | 0.008797 | DCTN3    |
| 6820.158 | 5.714223 | -7068 | 7.51E-05 | 986  | 0.333333 | 0.013506 | PRKCB    |
| 10689.17 | 8.434129 | -7068 | 7.52E-05 | 904  | 0.333333 | 0.011406 | TM4SF5   |
| 10432.91 | 9.601557 | -7068 | 7.49E-05 | 846  | 0.333333 | 0.012424 | KCNH1    |
| 7893.24  | 6.016316 | -7068 | 7.50E-05 | 979  | 0.333333 | 0.011663 | ITIH1    |
| 8700.46  | 7.320065 | -7068 | 7.54E-05 | 968  | 0.333333 | 0.014025 | PNP      |
| 10152.53 | 7.620229 | -7068 | 7.56E-05 | 989  | 0.333333 | 0.014682 | POGZ     |
| 9881.116 | 7.177896 | -7068 | 7.57E-05 | 1023 | 0.333333 | 0.014839 | COX7A2   |
| 6286.656 | 12.08444 | -7068 | 7.32E-05 | 498  | 0.333333 | 0.005439 | GNRH2    |
| 12679.02 | 11.75984 | -7068 | 7.43E-05 | 750  | 0.333333 | 0.009186 | CELA2B   |
| 22760.23 | 7.833242 | -7068 | 7.82E-05 | 1460 | 0.333333 | 0.021555 | OCA2     |
| 14296.74 | 6.564987 | -7068 | 7.72E-05 | 1318 | 0.333333 | 0.019851 | PIP5K1B  |
| 15493.2  | 8.185633 | -7068 | 7.66E-05 | 1153 | 0.333333 | 0.016674 | CALB2    |
| 5899.041 | 9.787211 | -7068 | 7.37E-05 | 624  | 0.333333 | 0.008515 | SCRIB    |

|          |          |       |          |      |          |          |          |
|----------|----------|-------|----------|------|----------|----------|----------|
| 3532.07  | 6.023004 | -7068 | 7.35E-05 | 658  | 0.333333 | 0.008305 | PRPF6    |
| 4423.167 | 5.990098 | -7068 | 7.41E-05 | 758  | 0.333333 | 0.010629 | RPN1     |
| 7071.285 | 6.22304  | -7068 | 7.50E-05 | 936  | 0.333333 | 0.01266  | ICAM1    |
| 9277.09  | 8.354131 | -7068 | 7.50E-05 | 866  | 0.333333 | 0.012368 | IGHMBP2  |
| 8340.458 | 5.260617 | -7068 | 7.61E-05 | 1165 | 0.333333 | 0.016814 | NCL      |
| 6861.523 | 6.663815 | -7068 | 7.45E-05 | 852  | 0.333333 | 0.010121 | F10      |
| 15199.45 | 4.594779 | -7068 | 7.77E-05 | 1652 | 0.333333 | 0.020793 | PCNA     |
| 19704.05 | 7.722731 | -7068 | 7.77E-05 | 1372 | 0.333333 | 0.020544 | FSTL4    |
| 3399.411 | 8.15433  | -7068 | 7.33E-05 | 553  | 0.333333 | 0.007856 | PPP1R1A  |
| 8611.223 | 7.611819 | -7068 | 7.53E-05 | 928  | 0.333333 | 0.013817 | UBAC1    |
| 4791.677 | 7.453982 | -7068 | 7.42E-05 | 707  | 0.333333 | 0.011187 | ARFGEF1  |
| 3730.667 | 8.716901 | -7068 | 7.33E-05 | 547  | 0.333333 | 0.007622 | TRH      |
| 8013.951 | 7.805015 | -7068 | 7.50E-05 | 876  | 0.333333 | 0.012728 | CBR1     |
| 13450.94 | 7.291101 | -7068 | 7.66E-05 | 1202 | 0.333333 | 0.018435 | UGP2     |
| 5524.29  | 6.018399 | -7068 | 7.47E-05 | 870  | 0.333333 | 0.012957 | PPP1CB   |
| 11346.59 | 7.307852 | -7068 | 7.61E-05 | 1081 | 0.333333 | 0.015726 | HYOU1    |
| 6944.043 | 6.919954 | -7068 | 7.49E-05 | 887  | 0.333333 | 0.012995 | XRCC4    |
| 7006.09  | 5.651162 | -7068 | 7.53E-05 | 1028 | 0.333333 | 0.014741 | INSR     |
| 14845.19 | 6.65011  | -7068 | 7.72E-05 | 1328 | 0.333333 | 0.019356 | CD55     |
| 5561.877 | 7.012281 | -7068 | 7.44E-05 | 781  | 0.333333 | 0.010991 | BAK1     |
| 9059.089 | 6.498524 | -7068 | 7.56E-05 | 1045 | 0.333333 | 0.015017 | TRAF3    |
| 6434.048 | 7.460354 | -7068 | 7.46E-05 | 804  | 0.333333 | 0.011658 | PRDX4    |
| 8336.202 | 7.464824 | -7068 | 7.50E-05 | 924  | 0.333333 | 0.012945 | VHL      |
| 5998.322 | 10.02922 | -7068 | 7.36E-05 | 605  | 0.333333 | 0.007988 | PRKACG   |
| 4533.583 | 7.803848 | -7068 | 7.38E-05 | 652  | 0.333333 | 0.009134 | CIRBP    |
| 8389.464 | 8.625763 | -7068 | 7.48E-05 | 828  | 0.333333 | 0.012015 | COL9A2   |
| 6203.883 | 7.585586 | -7068 | 7.44E-05 | 764  | 0.333333 | 0.010577 | CNGA1    |
| 5995.175 | 8.08257  | -7068 | 7.39E-05 | 696  | 0.333333 | 0.008808 | CSF3     |
| 16796.27 | 7.064782 | -7068 | 7.75E-05 | 1358 | 0.333333 | 0.020281 | MAP2K5   |
| 7673.026 | 7.900889 | -7068 | 7.46E-05 | 816  | 0.333333 | 0.010859 | NPY      |
| 6360.559 | 7.167733 | -7068 | 7.45E-05 | 815  | 0.333333 | 0.010849 | ALDOA    |
| 6684.071 | 6.231415 | -7068 | 7.49E-05 | 919  | 0.333333 | 0.013513 | PAM      |
| 12483.15 | 5.747609 | -7068 | 7.67E-05 | 1327 | 0.333333 | 0.01803  | HMGB2    |
| 4971.418 | 6.713534 | -7068 | 7.42E-05 | 760  | 0.333333 | 0.010744 | MAP3K1   |
| 5635.721 | 6.992514 | -7068 | 7.44E-05 | 765  | 0.333333 | 0.010322 | TRAP1    |
| 26172.71 | 6.307555 | -7068 | 7.99E-05 | 1831 | 0.333333 | 0.027095 | MAF      |
| 7929.56  | 6.723603 | -7068 | 7.51E-05 | 954  | 0.333333 | 0.013518 | CASP7    |
| 8911.076 | 7.518395 | -7068 | 7.53E-05 | 937  | 0.333333 | 0.013215 | ATP6VOC  |
| 17000.69 | 6.513721 | -7068 | 7.79E-05 | 1446 | 0.333333 | 0.021762 | PLPP3    |
| 7838.215 | 10.86592 | -7068 | 7.38E-05 | 645  | 0.333333 | 0.007918 | NKX2-5   |
| 6076.577 | 7.01686  | -7068 | 7.46E-05 | 798  | 0.333333 | 0.011972 | ZMPSTE24 |

|          |          |       |          |      |          |          |          |
|----------|----------|-------|----------|------|----------|----------|----------|
| 11401.78 | 6.177304 | -7068 | 7.66E-05 | 1243 | 0.333333 | 0.018379 | CCND2    |
| 6282.917 | 8.457058 | -7068 | 7.42E-05 | 720  | 0.333333 | 0.010056 | TNK2     |
| 9576.201 | 8.551935 | -7068 | 7.49E-05 | 881  | 0.333333 | 0.01143  | SLC2A4   |
| 10907.77 | 7.149929 | -7068 | 7.58E-05 | 1065 | 0.333333 | 0.015237 | SCN2A    |
| 9970.59  | 7.717567 | -7068 | 7.55E-05 | 978  | 0.333333 | 0.013868 | MMP15    |
| 8314.862 | 7.130785 | -7068 | 7.51E-05 | 936  | 0.333333 | 0.013291 | PRG4     |
| 14198.8  | 8.122316 | -7068 | 7.64E-05 | 1140 | 0.333333 | 0.017023 | CLASP1   |
| 6460.337 | 7.85283  | -7068 | 7.43E-05 | 749  | 0.333333 | 0.009991 | MALL     |
| 6184.988 | 7.664881 | -7068 | 7.44E-05 | 762  | 0.333333 | 0.010603 | PARK7    |
| 7220.986 | 7.536109 | -7068 | 7.46E-05 | 839  | 0.333333 | 0.012082 | MAX      |
| 9408.871 | 6.646657 | -7068 | 7.60E-05 | 1073 | 0.333333 | 0.016407 | PON2     |
| 6526.526 | 8.239633 | -7068 | 7.42E-05 | 731  | 0.333333 | 0.009771 | FGF4     |
| 6072.002 | 7.459147 | -7068 | 7.44E-05 | 759  | 0.333333 | 0.010596 | SNX17    |
| 4714.473 | 6.415609 | -7068 | 7.44E-05 | 783  | 0.333333 | 0.012303 | PPP3CB   |
| 3361.549 | 7.864667 | -7068 | 7.31E-05 | 543  | 0.333333 | 0.006864 | VAMP2    |
| 9615.63  | 9.544884 | -7068 | 7.46E-05 | 797  | 0.333333 | 0.010404 | DNASE1   |
| 8235.45  | 8.280296 | -7068 | 7.49E-05 | 853  | 0.25     | 0.012276 | SPOCK2   |
| 5836.274 | 6.282067 | -7068 | 7.46E-05 | 853  | 0.333333 | 0.01189  | EIF4B    |
| 9130.752 | 8.065644 | -7068 | 7.46E-05 | 851  | 0.333333 | 0.0105   | IKBKKG   |
| 10414.79 | 7.564429 | -7068 | 7.57E-05 | 1009 | 0.333333 | 0.014623 | CD226    |
| 6110.724 | 9.533122 | -7068 | 7.36E-05 | 633  | 0.333333 | 0.008527 | MYF5     |
| 4147.152 | 7.588951 | -7068 | 7.39E-05 | 653  | 0.333333 | 0.009993 | PPT1     |
| 8256.858 | 7.433593 | -7068 | 7.52E-05 | 920  | 0.333333 | 0.013728 | ABCC5    |
| 11314.14 | 7.282235 | -7068 | 7.59E-05 | 1074 | 0.333333 | 0.014998 | GRHPR    |
| 9309.798 | 8.019857 | -7068 | 7.51E-05 | 912  | 0.333333 | 0.012439 | ZRSR2    |
| 8746.224 | 8.230217 | -7068 | 7.49E-05 | 852  | 0.333333 | 0.012165 | KEAP1    |
| 11614.72 | 6.064407 | -7068 | 7.66E-05 | 1253 | 0.333333 | 0.01786  | PSMA1    |
| 5437.15  | 9.383351 | -7068 | 7.36E-05 | 606  | 0.333333 | 0.008017 | S1PR2    |
| 8843.245 | 6.324574 | -7068 | 7.53E-05 | 1026 | 0.333333 | 0.013674 | UQCRC2   |
| 2481.004 | 6.9875   | -7068 | 7.29E-05 | 504  | 0.333333 | 0.007003 | EXOSC10  |
| 10587.64 | 6.934756 | -7068 | 7.59E-05 | 1082 | 0.333333 | 0.015242 | MAOA     |
| 7630.685 | 8.359119 | -7068 | 7.46E-05 | 803  | 0.333333 | 0.011056 | KCNN4    |
| 10311.66 | 7.345295 | -7068 | 7.57E-05 | 1027 | 0.333333 | 0.015671 | UGCG     |
| 8184.32  | 7.296276 | -7068 | 7.50E-05 | 910  | 0.333333 | 0.012606 | PPP5C    |
| 6004.547 | 6.108938 | -7068 | 7.46E-05 | 873  | 0.333333 | 0.011824 | PDHA1    |
| 7582.693 | 6.495112 | -7068 | 7.52E-05 | 947  | 0.333333 | 0.01293  | EIF4G1   |
| 8964.95  | 7.314691 | -7068 | 7.52E-05 | 942  | 0.333333 | 0.012427 | FBP1     |
| 17131.55 | 7.74045  | -7068 | 7.72E-05 | 1276 | 0.333333 | 0.018422 | SELENBP1 |
| 14723.66 | 7.139825 | -7068 | 7.69E-05 | 1255 | 0.333333 | 0.018524 | SLC12A2  |
| 6738.217 | 8.598541 | -7068 | 7.43E-05 | 742  | 0.333333 | 0.010272 | CKB      |
| 6494.58  | 7.311076 | -7068 | 7.43E-05 | 794  | 0.333333 | 0.01013  | RELB     |

|          |          |       |          |      |          |          |          |
|----------|----------|-------|----------|------|----------|----------|----------|
| 10943.02 | 7.408495 | -7068 | 7.59E-05 | 1067 | 0.333333 | 0.015402 | DDX6     |
| 10007.66 | 8.838748 | -7068 | 7.49E-05 | 869  | 0.333333 | 0.012054 | SIM1     |
| 10996.03 | 7.24522  | -7068 | 7.60E-05 | 1096 | 0.333333 | 0.016079 | NF2      |
| 21059.06 | 31.47015 | -7068 | 7.31E-05 | 495  | 0.333333 | 0.005714 | OR10H3   |
| 2795.992 | 6.397064 | -7068 | 7.33E-05 | 582  | 0.333333 | 0.008852 | MED13    |
| 8523.119 | 6.90224  | -7068 | 7.54E-05 | 982  | 0.333333 | 0.014919 | TFCP2    |
| 5152.006 | 6.956036 | -7068 | 7.43E-05 | 761  | 0.333333 | 0.011447 | ZFP36L2  |
| 6816.563 | 8.683803 | -7068 | 7.40E-05 | 712  | 0.333333 | 0.008719 | GPT      |
| 13371.76 | 6.665054 | -7068 | 7.67E-05 | 1256 | 0.333333 | 0.017992 | IL1RAP   |
| 5680.402 | 8.337018 | -7068 | 7.40E-05 | 692  | 0.333333 | 0.00921  | XPC      |
| 13052.85 | 6.125293 | -7068 | 7.68E-05 | 1284 | 0.333333 | 0.017981 | F13A1    |
| 7183.803 | 6.816572 | -7068 | 7.51E-05 | 920  | 0.333333 | 0.013551 | GSR      |
| 8423.142 | 7.337927 | -7068 | 7.54E-05 | 943  | 0.333333 | 0.014468 | CTNNAL1  |
| 10297.15 | 7.204487 | -7068 | 7.57E-05 | 1029 | 0.333333 | 0.014663 | MMP7     |
| 11455.04 | 9.201863 | -7068 | 7.51E-05 | 900  | 0.333333 | 0.01196  | HSPB2    |
| 3615.616 | 7.398856 | -7068 | 7.36E-05 | 612  | 0.333333 | 0.009471 | MTMR4    |
| 9021.495 | 6.872747 | -7068 | 7.56E-05 | 1012 | 0.333333 | 0.014788 | SDC2     |
| 8978.864 | 6.353034 | -7068 | 7.54E-05 | 1027 | 0.333333 | 0.013591 | LSM2     |
| 9721.92  | 10.30017 | -7068 | 7.45E-05 | 776  | 0.333333 | 0.010993 | HOXA1    |
| 10560.52 | 7.905075 | -7068 | 7.56E-05 | 988  | 0.333333 | 0.01387  | LTBR     |
| 7734.355 | 5.474728 | -7068 | 7.53E-05 | 1070 | 0.333333 | 0.014213 | MAPK8    |
| 11019.62 | 7.049978 | -7068 | 7.60E-05 | 1098 | 0.333333 | 0.015452 | EPHA2    |
| 8395.189 | 7.403333 | -7068 | 7.51E-05 | 925  | 0.333333 | 0.012917 | IDH2     |
| 6886.764 | 7.369043 | -7068 | 7.47E-05 | 829  | 0.333333 | 0.011674 | YIF1A    |
| 8349.337 | 4.857092 | -7068 | 7.57E-05 | 1167 | 0.333333 | 0.01474  | EZH2     |
| 16854.3  | 6.251023 | -7068 | 7.77E-05 | 1459 | 0.333333 | 0.020866 | GHR      |
| 10070.56 | 7.098945 | -7068 | 7.59E-05 | 1043 | 0.333333 | 0.015736 | PTPRR    |
| 7958.944 | 7.410466 | -7068 | 7.49E-05 | 887  | 0.333333 | 0.012567 | TNFRSF25 |
| 8136.823 | 6.090092 | -7068 | 7.59E-05 | 1056 | 0.333333 | 0.016586 | SPAG9    |
| 5601.52  | 6.304139 | -7068 | 7.47E-05 | 849  | 0.333333 | 0.012917 | PRKCI    |
| 11645.35 | 8.224474 | -7068 | 7.56E-05 | 990  | 0.333333 | 0.014017 | SPINK2   |
| 9435.395 | 6.557266 | -7068 | 7.61E-05 | 1084 | 0.333333 | 0.016791 | UBE2H    |
| 7467.376 | 7.624732 | -7068 | 7.47E-05 | 834  | 0.333333 | 0.011416 | ALDH3A1  |
| 12464.09 | 6.503779 | -7068 | 7.64E-05 | 1197 | 0.333333 | 0.016032 | FOXO1    |
| 4039.269 | 9.257763 | -7068 | 7.32E-05 | 524  | 0.333333 | 0.00665  | SMG5     |
| 5008.265 | 6.322388 | -7068 | 7.43E-05 | 780  | 0.333333 | 0.011415 | RAB11A   |
| 10520.56 | 6.606306 | -7068 | 7.62E-05 | 1122 | 0.333333 | 0.016792 | MAPK10   |
| 6140.574 | 8.742347 | -7068 | 7.40E-05 | 670  | 0.333333 | 0.009249 | ACP2     |
| 6974.116 | 7.766639 | -7068 | 7.46E-05 | 805  | 0.333333 | 0.01161  | PDE2A    |
| 8207.015 | 6.019703 | -7068 | 7.56E-05 | 1072 | 0.333333 | 0.01542  | MAP2K1   |
| 7340.068 | 7.156666 | -7068 | 7.49E-05 | 889  | 0.333333 | 0.01299  | AKT2     |



|          |          |       |          |      |          |          |         |
|----------|----------|-------|----------|------|----------|----------|---------|
| 7805.703 | 6.855738 | -7068 | 7.49E-05 | 934  | 0.333333 | 0.012585 | PLCG1   |
| 5906.382 | 5.320439 | -7068 | 7.50E-05 | 948  | 0.333333 | 0.013233 | PSMD6   |
| 15771.94 | 6.885304 | -7068 | 7.68E-05 | 1299 | 0.333333 | 0.017529 | APOB    |
| 12766.06 | 7.063858 | -7068 | 7.66E-05 | 1195 | 0.333333 | 0.01793  | KRT10   |
| 5519.144 | 7.745759 | -7068 | 7.42E-05 | 726  | 0.333333 | 0.010976 | NAP1L3  |
| 14387.65 | 5.993038 | -7068 | 7.73E-05 | 1392 | 0.333333 | 0.020324 | PALLD   |
| 12581.74 | 6.554642 | -7068 | 7.68E-05 | 1249 | 0.333333 | 0.019009 | SEC31A  |
| 7432.091 | 8.277412 | -7068 | 7.45E-05 | 787  | 0.333333 | 0.011739 | FEM1B   |
| 5921.505 | 7.418658 | -7068 | 7.44E-05 | 765  | 0.333333 | 0.010486 | GPI     |
| 5424.838 | 7.774419 | -7068 | 7.39E-05 | 705  | 0.333333 | 0.009875 | NCOA6   |
| 8097.155 | 7.073214 | -7068 | 7.53E-05 | 944  | 0.333333 | 0.014108 | CENPC   |
| 7768.711 | 6.477108 | -7068 | 7.53E-05 | 984  | 0.333333 | 0.014802 | PDIA3   |
| 8223.59  | 5.304037 | -7068 | 7.56E-05 | 1134 | 0.333333 | 0.014575 | SHC1    |
| 6700.779 | 6.253281 | -7068 | 7.46E-05 | 870  | 0.333333 | 0.011922 | GNL2    |
| 16371.34 | 6.372408 | -7068 | 7.76E-05 | 1417 | 0.333333 | 0.020826 | MAP7    |
| 6241.114 | 6.976897 | -7068 | 7.45E-05 | 818  | 0.333333 | 0.011407 | CEACAM1 |
| 14104.62 | 7.859124 | -7068 | 7.62E-05 | 1137 | 0.333333 | 0.015728 | SFN     |
| 12491.97 | 6.872479 | -7068 | 7.67E-05 | 1206 | 0.333333 | 0.018424 | CTBP2   |
| 6705.126 | 8.018425 | -7068 | 7.37E-05 | 687  | 0.333333 | 0.008585 | ZNF529  |
| 8332.083 | 8.042578 | -7068 | 7.49E-05 | 860  | 0.333333 | 0.012086 | SCN8A   |
| 11019.43 | 8.063664 | -7068 | 7.55E-05 | 978  | 0.333333 | 0.013975 | EPHX2   |
| 12021.96 | 4.967172 | -7068 | 7.66E-05 | 1406 | 0.333333 | 0.018222 | CDC6    |
| 9009.301 | 7.110929 | -7068 | 7.54E-05 | 975  | 0.333333 | 0.014249 | SRPX    |
| 7778.933 | 6.499592 | -7068 | 7.50E-05 | 967  | 0.333333 | 0.013218 | SQSTM1  |
| 8025.559 | 8.387374 | -7068 | 7.47E-05 | 803  | 0.333333 | 0.011034 | CFP     |
| 14232.23 | 7.083838 | -7068 | 7.68E-05 | 1239 | 0.333333 | 0.017272 | CAPN1   |
| 6975.807 | 4.510004 | -7068 | 7.55E-05 | 1143 | 0.333333 | 0.01515  | DHX9    |
| 8198.003 | 6.685604 | -7068 | 7.51E-05 | 958  | 0.333333 | 0.01275  | IGFBP1  |
| 12181.87 | 7.08916  | -7068 | 7.60E-05 | 1121 | 0.333333 | 0.015133 | C4BPB   |
| 7762.417 | 5.42466  | -7068 | 7.57E-05 | 1089 | 0.333333 | 0.015622 | RAN     |
| 7502.563 | 6.587976 | -7068 | 7.53E-05 | 951  | 0.333333 | 0.014827 | MAP4K5  |
| 16035.86 | 5.288672 | -7068 | 7.77E-05 | 1568 | 0.333333 | 0.020316 | CKS2    |
| 466.911  | 12.08988 | -7068 | 7.07E-05 | 136  | 0.25     | 0.001626 | FAM161A |
| 6699.5   | 7.71584  | -7068 | 7.46E-05 | 793  | 0.333333 | 0.011297 | KCNA5   |
| 2364.342 | 8.245875 | -7068 | 7.27E-05 | 446  | 0.333333 | 0.006033 | STARD3  |
| 15037.97 | 5.75458  | -7068 | 7.75E-05 | 1456 | 0.333333 | 0.020694 | COL15A1 |
| 6292.13  | 5.842773 | -7068 | 7.50E-05 | 939  | 0.333333 | 0.013206 | EWSR1   |
| 11848.83 | 7.161702 | -7068 | 7.63E-05 | 1129 | 0.333333 | 0.016379 | ECE1    |
| 16450.1  | 7.324354 | -7068 | 7.70E-05 | 1297 | 0.333333 | 0.017651 | ASS1    |
| 7714.889 | 6.956079 | -7068 | 7.49E-05 | 910  | 0.333333 | 0.012356 | LAMA5   |
| 7724.659 | 7.949672 | -7068 | 7.44E-05 | 805  | 0.333333 | 0.010206 | CCL7    |

|          |          |       |          |      |          |          |         |
|----------|----------|-------|----------|------|----------|----------|---------|
| 3324.538 | 7.712331 | -7068 | 7.33E-05 | 574  | 0.333333 | 0.008182 | UROS    |
| 12137.12 | 8.474937 | -7068 | 7.56E-05 | 971  | 0.333333 | 0.012614 | PRSS8   |
| 7198.334 | 6.742629 | -7068 | 7.48E-05 | 895  | 0.333333 | 0.012148 | CRYAB   |
| 17730.22 | 6.880083 | -7068 | 7.80E-05 | 1440 | 0.333333 | 0.021737 | SLC20A1 |
| 9065.97  | 6.585056 | -7068 | 7.57E-05 | 1046 | 0.333333 | 0.015441 | PTPRF   |
| 6987.706 | 7.960018 | -7068 | 7.43E-05 | 782  | 0.333333 | 0.010863 | CAV3    |
| 2738.195 | 6.453774 | -7068 | 7.30E-05 | 553  | 0.333333 | 0.00697  | IRF7    |
| 4872.642 | 7.328986 | -7068 | 7.42E-05 | 718  | 0.333333 | 0.010897 | TAF1B   |
| 5851.388 | 8.507277 | -7068 | 7.39E-05 | 665  | 0.333333 | 0.008163 | SHBG    |
| 7731.8   | 7.821543 | -7068 | 7.50E-05 | 852  | 0.333333 | 0.012837 | PPP1R7  |
| 15719.71 | 6.495584 | -7068 | 7.71E-05 | 1338 | 0.333333 | 0.018376 | LRRC32  |
| 17225.42 | 7.094137 | -7068 | 7.77E-05 | 1376 | 0.333333 | 0.020774 | SYN3    |
| 8372.951 | 8.128599 | -7068 | 7.47E-05 | 823  | 0.333333 | 0.010957 | GPX4    |
| 30638.09 | 5.76643  | -7068 | 8.03E-05 | 2054 | 0.333333 | 0.027375 | RFC3    |
| 11521.55 | 7.441495 | -7068 | 7.60E-05 | 1063 | 0.333333 | 0.015832 | BPGM    |
| 5536.041 | 7.253287 | -7068 | 7.43E-05 | 763  | 0.333333 | 0.011168 | FECH    |
| 4722.424 | 8.032999 | -7068 | 7.36E-05 | 631  | 0.333333 | 0.008216 | FCMR    |
| 8466.241 | 6.787518 | -7068 | 7.52E-05 | 973  | 0.333333 | 0.013759 | ALDH3A2 |
| 9073.404 | 5.661957 | -7068 | 7.57E-05 | 1098 | 0.333333 | 0.014499 | AHSA1   |
| 8664.628 | 9.124997 | -7068 | 7.46E-05 | 790  | 0.333333 | 0.011059 | POU6F2  |
| 6914.374 | 7.609719 | -7068 | 7.47E-05 | 830  | 0.333333 | 0.012613 | SH3YL1  |
| 6186.624 | 9.389635 | -7068 | 7.31E-05 | 598  | 0.333333 | 0.007105 | ZNF415  |
| 13553.13 | 6.503508 | -7068 | 7.71E-05 | 1295 | 0.333333 | 0.019222 | TGFBI   |
| 10156.16 | 6.663814 | -7068 | 7.59E-05 | 1102 | 0.333333 | 0.015585 | PTPN1   |
| 4986.157 | 7.536487 | -7068 | 7.40E-05 | 674  | 0.333333 | 0.009137 | IFRD2   |
| 8374.136 | 6.196627 | -7068 | 7.55E-05 | 1025 | 0.333333 | 0.013955 | BGN     |
| 3155.744 | 9.174243 | -7068 | 7.30E-05 | 466  | 0.333333 | 0.006151 | KRT12   |
| 4504.587 | 8.338138 | -7068 | 7.37E-05 | 617  | 0.333333 | 0.008373 | NME4    |
| 7249.383 | 7.079525 | -7068 | 7.51E-05 | 893  | 0.333333 | 0.013697 | ZFYVE26 |
| 20738.73 | 9.914919 | -7068 | 7.64E-05 | 1153 | 0.333333 | 0.017713 | NDN     |
| 5567.683 | 7.069268 | -7068 | 7.44E-05 | 779  | 0.333333 | 0.01148  | MLC1    |
| 10421.16 | 7.136968 | -7068 | 7.54E-05 | 1011 | 0.333333 | 0.012779 | F11     |
| 30372.31 | 6.423645 | -7068 | 8.09E-05 | 1946 | 0.333333 | 0.029331 | PLXDC2  |
| 5639.123 | 6.663969 | -7068 | 7.45E-05 | 808  | 0.333333 | 0.011524 | CDO1    |
| 8680.507 | 4.395018 | -7068 | 7.58E-05 | 1247 | 0.333333 | 0.015183 | SNRPE   |
| 3653.205 | 10.30508 | -7068 | 7.29E-05 | 461  | 0.333333 | 0.005796 | SNPH    |
| 3175.063 | 9.324959 | -7068 | 7.30E-05 | 482  | 0.333333 | 0.006519 | RNF113A |
| 5847.909 | 7.320735 | -7068 | 7.46E-05 | 791  | 0.333333 | 0.012078 | ARHGEF6 |
| 5800.302 | 7.502193 | -7068 | 7.44E-05 | 767  | 0.333333 | 0.0115   | RGS13   |
| 8783.634 | 6.995919 | -7068 | 7.53E-05 | 964  | 0.333333 | 0.012736 | POLD1   |
| 19801.11 | 7.439159 | -7068 | 7.78E-05 | 1415 | 0.333333 | 0.020196 | RBM15B  |

|          |          |       |          |      |          |          |           |
|----------|----------|-------|----------|------|----------|----------|-----------|
| 8440.912 | 9.052503 | -7068 | 7.47E-05 | 803  | 0.333333 | 0.011232 | LSR       |
| 7877.477 | 6.681068 | -7068 | 7.51E-05 | 940  | 0.333333 | 0.012922 | FCGR2B    |
| 13020.56 | 6.671176 | -7068 | 7.69E-05 | 1254 | 0.333333 | 0.018525 | OGDH      |
| 2866.826 | 9.458335 | -7068 | 7.27E-05 | 442  | 0.333333 | 0.00604  | NPHP1     |
| 7003.035 | 5.47463  | -7068 | 7.52E-05 | 1035 | 0.333333 | 0.014116 | PXN       |
| 5337.607 | 8.190264 | -7068 | 7.39E-05 | 662  | 0.333333 | 0.008707 | ECI1      |
| 8497.736 | 9.223638 | -7068 | 7.45E-05 | 774  | 0.333333 | 0.010497 | BCS1L     |
| 10130.72 | 7.570418 | -7068 | 7.57E-05 | 1005 | 0.333333 | 0.015136 | ZMYND8    |
| 13132.46 | 6.26194  | -7068 | 7.71E-05 | 1307 | 0.333333 | 0.019426 | CD59      |
| 12632.69 | 6.650836 | -7068 | 7.67E-05 | 1228 | 0.333333 | 0.018367 | SGCD      |
| 8519.043 | 6.995493 | -7068 | 7.51E-05 | 951  | 0.333333 | 0.012839 | TTR       |
| 6174.814 | 4.730784 | -7068 | 7.54E-05 | 1071 | 0.333333 | 0.014868 | HNRNPC    |
| 10668.03 | 7.062719 | -7068 | 7.60E-05 | 1086 | 0.333333 | 0.016038 | TOX       |
| 15124.5  | 6.766006 | -7068 | 7.70E-05 | 1318 | 0.333333 | 0.018813 | TGFBR1    |
| 11580.42 | 5.544376 | -7068 | 7.65E-05 | 1283 | 0.333333 | 0.017264 | PDGFRB    |
| 6107.496 | 7.43572  | -7068 | 7.46E-05 | 797  | 0.333333 | 0.012103 | DGUOK     |
| 6434.104 | 9.316033 | -7068 | 7.40E-05 | 686  | 0.333333 | 0.009555 | CLSTN3    |
| 5548.788 | 8.764412 | -7068 | 7.40E-05 | 665  | 0.333333 | 0.009197 | TNFRSF10D |
| 6837.966 | 5.778185 | -7068 | 7.50E-05 | 959  | 0.333333 | 0.013061 | SREK1     |
| 5399.646 | 6.259245 | -7068 | 7.47E-05 | 843  | 0.333333 | 0.0133   | TLK1      |
| 17941.22 | 6.711184 | -7068 | 7.81E-05 | 1452 | 0.333333 | 0.021924 | ABLM1     |
| 8281.649 | 6.76993  | -7068 | 7.56E-05 | 992  | 0.333333 | 0.015708 | STK38L    |
| 9202.59  | 6.584085 | -7068 | 7.58E-05 | 1054 | 0.333333 | 0.015536 | DDX10     |
| 13123.16 | 7.010911 | -7068 | 7.68E-05 | 1217 | 0.333333 | 0.017879 | WARS      |
| 9179.719 | 7.275526 | -7068 | 7.56E-05 | 986  | 0.333333 | 0.014976 | ITM2B     |
| 13994.06 | 6.279474 | -7068 | 7.70E-05 | 1325 | 0.333333 | 0.018875 | NFIL3     |
| 17269.99 | 4.647724 | -7068 | 7.80E-05 | 1740 | 0.333333 | 0.021559 | CHEK1     |
| 4439.643 | 6.253463 | -7068 | 7.37E-05 | 729  | 0.333333 | 0.008813 | POLR2A    |
| 7577.492 | 7.472245 | -7068 | 7.50E-05 | 868  | 0.333333 | 0.01288  | HAPLN1    |
| 12862.43 | 6.709143 | -7068 | 7.67E-05 | 1231 | 0.333333 | 0.018176 | NCK2      |
| 7081.291 | 6.875908 | -7068 | 7.47E-05 | 857  | 0.333333 | 0.011495 | LST1      |
| 6497.908 | 6.668905 | -7068 | 7.48E-05 | 883  | 0.333333 | 0.013148 | BCR       |
| 4842.766 | 7.415021 | -7068 | 7.40E-05 | 696  | 0.333333 | 0.010395 | NEK1      |
| 3638.199 | 5.337847 | -7068 | 7.41E-05 | 743  | 0.333333 | 0.010707 | PWP1      |
| 29332.95 | 6.596454 | -7068 | 8.02E-05 | 1865 | 0.333333 | 0.027105 | SPOCK1    |
| 3693.75  | 7.337961 | -7068 | 7.34E-05 | 588  | 0.333333 | 0.007677 | PMPCA     |
| 7932.454 | 8.447444 | -7068 | 7.47E-05 | 812  | 0.333333 | 0.01142  | SPTBN2    |
| 5543.587 | 9.416216 | -7068 | 7.36E-05 | 618  | 0.333333 | 0.00781  | UNC119    |
| 5461.694 | 7.870002 | -7068 | 7.41E-05 | 705  | 0.333333 | 0.010232 | PHF14     |
| 5159.95  | 7.433736 | -7068 | 7.39E-05 | 700  | 0.333333 | 0.009322 | WFDC2     |
| 13787.38 | 5.830641 | -7068 | 7.70E-05 | 1384 | 0.333333 | 0.019275 | FAS       |

|          |          |       |          |      |          |          |          |
|----------|----------|-------|----------|------|----------|----------|----------|
| 6923.586 | 6.591885 | -7068 | 7.52E-05 | 930  | 0.333333 | 0.014171 | PPP2R5A  |
| 4647.958 | 8.289868 | -7068 | 7.36E-05 | 626  | 0.333333 | 0.008389 | ADGRE1   |
| 11496.64 | 6.714185 | -7068 | 7.61E-05 | 1146 | 0.333333 | 0.016707 | ARNT     |
| 12803.45 | 7.249405 | -7068 | 7.63E-05 | 1150 | 0.333333 | 0.016501 | KCNJ3    |
| 16465.11 | 7.338599 | -7068 | 7.73E-05 | 1318 | 0.333333 | 0.019482 | PIM1     |
| 7015.856 | 6.251832 | -7068 | 7.52E-05 | 955  | 0.333333 | 0.01422  | FGF2     |
| 10491.86 | 7.720114 | -7068 | 7.58E-05 | 1011 | 0.333333 | 0.015752 | CCDC28A  |
| 4578.599 | 9.061288 | -7068 | 7.35E-05 | 585  | 0.333333 | 0.007877 | ERN1     |
| 7959.947 | 5.144171 | -7068 | 7.54E-05 | 1097 | 0.333333 | 0.014083 | SNRPF    |
| 12540.01 | 6.750033 | -7068 | 7.68E-05 | 1223 | 0.333333 | 0.018937 | ATXN10   |
| 8560.926 | 6.655785 | -7068 | 7.56E-05 | 1010 | 0.333333 | 0.015092 | HEXB     |
| 9528.386 | 5.620303 | -7068 | 7.59E-05 | 1165 | 0.333333 | 0.015912 | TEK      |
| 10850.92 | 5.784225 | -7068 | 7.65E-05 | 1238 | 0.333333 | 0.017663 | HSPA9    |
| 4055.989 | 5.388096 | -7068 | 7.40E-05 | 775  | 0.333333 | 0.010901 | RAB5A    |
| 4975.324 | 7.36531  | -7068 | 7.41E-05 | 719  | 0.333333 | 0.011179 | TNRC6B   |
| 8903.123 | 7.87886  | -7068 | 7.50E-05 | 895  | 0.333333 | 0.012293 | RHOD     |
| 8027.582 | 6.82781  | -7068 | 7.55E-05 | 974  | 0.333333 | 0.014754 | RASA2    |
| 12177.56 | 6.447775 | -7068 | 7.61E-05 | 1177 | 0.333333 | 0.01479  | C4BPA    |
| 10329.02 | 5.772866 | -7068 | 7.64E-05 | 1223 | 0.333333 | 0.017837 | SF3A1    |
| 5636.295 | 6.573503 | -7068 | 7.43E-05 | 781  | 0.333333 | 0.010314 | HLA-A    |
| 8142.066 | 6.989087 | -7068 | 7.54E-05 | 961  | 0.333333 | 0.014676 | PFN2     |
| 10333.73 | 6.818899 | -7068 | 7.56E-05 | 1023 | 0.333333 | 0.012547 | F7       |
| 8247.131 | 6.729636 | -7068 | 7.53E-05 | 975  | 0.333333 | 0.013838 | BCL2A1   |
| 4799.222 | 8.01341  | -7068 | 7.40E-05 | 675  | 0.333333 | 0.009802 | PPP1R11  |
| 6121.787 | 8.121814 | -7068 | 7.42E-05 | 727  | 0.333333 | 0.00959  | ZNHIT1   |
| 4831.869 | 7.099661 | -7068 | 7.42E-05 | 731  | 0.333333 | 0.011108 | TAX1BP1  |
| 6503.645 | 8.975927 | -7068 | 7.42E-05 | 705  | 0.333333 | 0.009676 | NPPA     |
| 9993.106 | 7.433052 | -7068 | 7.57E-05 | 1011 | 0.333333 | 0.015232 | SNAI2    |
| 4227.746 | 8.185595 | -7068 | 7.34E-05 | 598  | 0.333333 | 0.008465 | COL4A4   |
| 9694.556 | 9.247078 | -7068 | 7.45E-05 | 794  | 0.333333 | 0.01066  | SLC22A2  |
| 5142.364 | 8.290142 | -7068 | 7.36E-05 | 638  | 0.333333 | 0.007744 | FCER2    |
| 7161.209 | 6.972031 | -7068 | 7.50E-05 | 897  | 0.333333 | 0.01307  | SLC31A1  |
| 5348.057 | 7.164299 | -7068 | 7.43E-05 | 743  | 0.333333 | 0.010173 | ARHGDI A |
| 9513.284 | 7.127812 | -7068 | 7.57E-05 | 1027 | 0.333333 | 0.015267 | RRBP1    |
| 28615.21 | 6.422098 | -7068 | 8.05E-05 | 1888 | 0.333333 | 0.028387 | ZEB2     |
| 9498.937 | 5.855608 | -7068 | 7.63E-05 | 1164 | 0.333333 | 0.017455 | HPRT1    |
| 13128.97 | 6.961372 | -7068 | 7.66E-05 | 1221 | 0.333333 | 0.017656 | PPIF     |
| 10104.07 | 7.031924 | -7068 | 7.58E-05 | 1057 | 0.333333 | 0.015219 | XBP1     |
| 16944.85 | 6.935032 | -7068 | 7.77E-05 | 1385 | 0.333333 | 0.021229 | IQSEC1   |
| 9047.587 | 7.445986 | -7068 | 7.50E-05 | 921  | 0.333333 | 0.011496 | HMGCL    |
| 8862.518 | 9.227013 | -7068 | 7.48E-05 | 841  | 0.333333 | 0.01279  | UBE4B    |

|          |          |       |          |      |          |          |          |
|----------|----------|-------|----------|------|----------|----------|----------|
| 6523.349 | 8.186489 | -7068 | 7.42E-05 | 737  | 0.333333 | 0.009936 | GNB3     |
| 18823.96 | 6.939206 | -7068 | 7.80E-05 | 1450 | 0.333333 | 0.022239 | NPAS3    |
| 7820.049 | 6.277016 | -7068 | 7.55E-05 | 1003 | 0.333333 | 0.015066 | ITGA8    |
| 11277.66 | 7.307075 | -7068 | 7.60E-05 | 1084 | 0.333333 | 0.015523 | BAD      |
| 6473.581 | 8.102868 | -7068 | 7.43E-05 | 737  | 0.333333 | 0.009638 | NUCB1    |
| 4417.924 | 7.588191 | -7068 | 7.38E-05 | 661  | 0.333333 | 0.009456 | DCTN2    |
| 4736.942 | 6.43997  | -7068 | 7.42E-05 | 745  | 0.333333 | 0.01035  | KCNMB1   |
| 9691.268 | 7.376778 | -7068 | 7.55E-05 | 997  | 0.333333 | 0.014843 | EGR3     |
| 6063.488 | 6.523353 | -7068 | 7.46E-05 | 866  | 0.333333 | 0.01199  | ERBB3    |
| 11237.42 | 6.24188  | -7068 | 7.61E-05 | 1170 | 0.333333 | 0.01566  | MMP9     |
| 7183.61  | 5.642954 | -7068 | 7.51E-05 | 1008 | 0.333333 | 0.012998 | BRCA2    |
| 5852.829 | 6.845454 | -7068 | 7.45E-05 | 806  | 0.333333 | 0.011756 | OPTN     |
| 5193.396 | 7.148786 | -7068 | 7.42E-05 | 741  | 0.333333 | 0.01074  | ALDH9A1  |
| 6640.18  | 7.83043  | -7068 | 7.45E-05 | 782  | 0.333333 | 0.011138 | NRGN     |
| 4615.659 | 6.841262 | -7068 | 7.42E-05 | 733  | 0.333333 | 0.011471 | PRRC2C   |
| 9400.092 | 7.268154 | -7068 | 7.54E-05 | 975  | 0.333333 | 0.013538 | SLC25A11 |
| 5139.019 | 7.153836 | -7068 | 7.43E-05 | 745  | 0.333333 | 0.011233 | MRPS27   |
| 8333.001 | 11.11537 | -7068 | 7.38E-05 | 626  | 0.333333 | 0.007526 | INS      |
| 6114.742 | 8.451667 | -7068 | 7.42E-05 | 705  | 0.333333 | 0.009731 | TELO2    |
| 10984.9  | 7.492609 | -7068 | 7.55E-05 | 1012 | 0.333333 | 0.013114 | CD14     |
| 6044.741 | 5.917435 | -7068 | 7.49E-05 | 919  | 0.333333 | 0.013486 | RAD23B   |
| 13230.38 | 7.64059  | -7068 | 7.57E-05 | 1085 | 0.333333 | 0.014163 | CYP17A1  |
| 12915.83 | 7.049574 | -7068 | 7.65E-05 | 1193 | 0.333333 | 0.017495 | EEF1A2   |
| 9578.909 | 6.459715 | -7068 | 7.60E-05 | 1092 | 0.333333 | 0.016497 | GATA6    |
| 2614.834 | 7.059338 | -7068 | 7.30E-05 | 510  | 0.333333 | 0.006391 | CCL21    |
| 6488.769 | 6.983777 | -7068 | 7.45E-05 | 826  | 0.25     | 0.011436 | IL18R1   |
| 8164.578 | 6.136687 | -7068 | 7.58E-05 | 1049 | 0.333333 | 0.015991 | UBE2E1   |
| 6934.279 | 6.280188 | -7068 | 7.50E-05 | 935  | 0.333333 | 0.013506 | PLAT     |
| 7903.988 | 4.315609 | -7068 | 7.56E-05 | 1206 | 0.333333 | 0.014037 | MCM7     |
| 7296.117 | 6.148939 | -7068 | 7.47E-05 | 916  | 0.333333 | 0.010893 | HRG      |
| 5788.675 | 7.592157 | -7068 | 7.41E-05 | 739  | 0.333333 | 0.009803 | FOLR3    |
| 3663.702 | 7.424834 | -7068 | 7.35E-05 | 608  | 0.333333 | 0.008584 | AKAP8    |
| 14096.68 | 7.776646 | -7068 | 7.65E-05 | 1156 | 0.333333 | 0.016819 | ABCG2    |
| 8288.264 | 7.257593 | -7068 | 7.52E-05 | 926  | 0.333333 | 0.013953 | TDRD3    |
| 6417.254 | 8.458878 | -7068 | 7.41E-05 | 727  | 0.333333 | 0.010145 | SH2D2A   |
| 8245.093 | 6.150431 | -7068 | 7.48E-05 | 904  | 0.333333 | 0.011226 | CYC1     |
| 9104.851 | 5.786229 | -7068 | 7.58E-05 | 1109 | 0.333333 | 0.014846 | PSMC3    |
| 10552.71 | 6.106438 | -7068 | 7.66E-05 | 1201 | 0.333333 | 0.018541 | MYLK     |
| 3983.031 | 8.441581 | -7068 | 7.35E-05 | 576  | 0.333333 | 0.008539 | ERC2     |
| 7693.519 | 7.832909 | -7068 | 7.48E-05 | 855  | 0.333333 | 0.012598 | REPS1    |
| 3017.316 | 6.659516 | -7068 | 7.35E-05 | 607  | 0.333333 | 0.009502 | EP400    |

|          |          |       |          |      |          |          |          |
|----------|----------|-------|----------|------|----------|----------|----------|
| 4443.593 | 9.164621 | -7068 | 7.33E-05 | 548  | 0.333333 | 0.007191 | PDC      |
| 12445.81 | 6.260295 | -7068 | 7.66E-05 | 1248 | 0.333333 | 0.017786 | PTGS2    |
| 3573.257 | 7.87669  | -7068 | 7.34E-05 | 569  | 0.333333 | 0.007782 | SLC39A7  |
| 2657.883 | 7.60712  | -7068 | 7.31E-05 | 512  | 0.333333 | 0.007744 | PRPSAP1  |
| 15331.1  | 6.429003 | -7068 | 7.77E-05 | 1389 | 0.333333 | 0.021348 | FAM13A   |
| 21581.46 | 5.938447 | -7068 | 7.87E-05 | 1680 | 0.333333 | 0.02317  | FBN1     |
| 4819.84  | 8.263992 | -7068 | 7.37E-05 | 641  | 0.333333 | 0.008995 | IFIH1    |
| 8812.943 | 7.772373 | -7068 | 7.54E-05 | 927  | 0.333333 | 0.014459 | PGRMC1   |
| 21325.06 | 6.412346 | -7068 | 7.87E-05 | 1629 | 0.333333 | 0.023605 | BCL6     |
| 15988.26 | 5.903856 | -7068 | 7.81E-05 | 1509 | 0.333333 | 0.022362 | DUSP3    |
| 14037.36 | 6.432487 | -7068 | 7.68E-05 | 1287 | 0.333333 | 0.017947 | ALOX5AP  |
| 5920.717 | 6.15138  | -7068 | 7.49E-05 | 887  | 0.333333 | 0.013557 | YTHDC2   |
| 19024.4  | 5.574835 | -7068 | 7.88E-05 | 1689 | 0.333333 | 0.024246 | CXCL12   |
| 5099.28  | 10.74864 | -7068 | 7.32E-05 | 518  | 0.333333 | 0.006812 | GUCY2D   |
| 3665.781 | 9.217444 | -7068 | 7.32E-05 | 518  | 0.333333 | 0.007273 | PTGES    |
| 4851.461 | 8.156912 | -7068 | 7.38E-05 | 650  | 0.333333 | 0.009388 | AMELX    |
| 12923.89 | 6.826461 | -7068 | 7.68E-05 | 1225 | 0.333333 | 0.018404 | BNIP3    |
| 8594.084 | 6.895997 | -7068 | 7.57E-05 | 1008 | 0.333333 | 0.015712 | SKI      |
| 15034.39 | 6.770177 | -7068 | 7.72E-05 | 1313 | 0.333333 | 0.019592 | ITPR1    |
| 9552.257 | 5.617981 | -7068 | 7.63E-05 | 1196 | 0.333333 | 0.017061 | PSMA4    |
| 4802.193 | 4.955998 | -7068 | 7.47E-05 | 913  | 0.333333 | 0.012958 | SRSF7    |
| 5597.187 | 6.309973 | -7068 | 7.45E-05 | 815  | 0.333333 | 0.011046 | NCF4     |
| 10331.49 | 6.741597 | -7068 | 7.61E-05 | 1097 | 0.333333 | 0.016853 | NRCAM    |
| 5739.95  | 9.486585 | -7068 | 7.36E-05 | 605  | 0.333333 | 0.007481 | SULT2B1  |
| 18323.16 | 6.669425 | -7068 | 7.82E-05 | 1468 | 0.333333 | 0.022289 | INSIG2   |
| 13688.94 | 6.324438 | -7068 | 7.69E-05 | 1324 | 0.333333 | 0.018909 | CBL      |
| 7703.171 | 8.506996 | -7068 | 7.42E-05 | 751  | 0.333333 | 0.00874  | GCGR     |
| 4643.067 | 6.028687 | -7068 | 7.44E-05 | 792  | 0.333333 | 0.012295 | ACBD3    |
| 10969.06 | 7.144625 | -7068 | 7.60E-05 | 1085 | 0.333333 | 0.015897 | RYR2     |
| 10816.5  | 7.614579 | -7068 | 7.56E-05 | 1016 | 0.333333 | 0.015125 | TYR      |
| 9137.694 | 7.343701 | -7068 | 7.53E-05 | 953  | 0.333333 | 0.014033 | GABBR2   |
| 13621.71 | 6.539838 | -7068 | 7.70E-05 | 1299 | 0.333333 | 0.018817 | RCC1     |
| 6477.497 | 8.518849 | -7068 | 7.41E-05 | 711  | 0.333333 | 0.009601 | BPHL     |
| 6369.824 | 6.909692 | -7068 | 7.48E-05 | 852  | 0.333333 | 0.012979 | RPE      |
| 4233.349 | 7.518778 | -7068 | 7.37E-05 | 642  | 0.333333 | 0.009194 | SSTR2    |
| 10031.32 | 7.892248 | -7068 | 7.53E-05 | 946  | 0.333333 | 0.01255  | ACADS    |
| 4571.119 | 7.964426 | -7068 | 7.37E-05 | 635  | 0.333333 | 0.008632 | GPSM3    |
| 12957.51 | 7.708973 | -7068 | 7.55E-05 | 1049 | 0.333333 | 0.013374 | FPR1     |
| 5250.78  | 8.129572 | -7068 | 7.38E-05 | 634  | 0.333333 | 0.007939 | GPAA1    |
| 16084.02 | 6.44333  | -7068 | 7.78E-05 | 1423 | 0.333333 | 0.021627 | PDE4D    |
| 6535.648 | 7.091376 | -7068 | 7.46E-05 | 830  | 0.333333 | 0.011523 | TNFRSF17 |

|          |          |       |          |      |          |          |          |
|----------|----------|-------|----------|------|----------|----------|----------|
| 3075.852 | 5.94541  | -7068 | 7.32E-05 | 609  | 0.333333 | 0.008015 | GEMIN2   |
| 7817.839 | 6.997625 | -7068 | 7.50E-05 | 929  | 0.333333 | 0.012985 | DDIT3    |
| 14395.24 | 7.548309 | -7068 | 7.66E-05 | 1194 | 0.333333 | 0.017787 | PTPRN2   |
| 4742.965 | 6.62744  | -7068 | 7.40E-05 | 720  | 0.333333 | 0.009272 | AFM      |
| 9892.477 | 7.046494 | -7068 | 7.59E-05 | 1048 | 0.333333 | 0.016094 | PKD2     |
| 21099.08 | 7.715633 | -7068 | 7.79E-05 | 1418 | 0.333333 | 0.020505 | SPR      |
| 5725.833 | 11.22159 | -7068 | 7.33E-05 | 542  | 0.333333 | 0.006709 | NFKBIL1  |
| 12603.85 | 6.888739 | -7068 | 7.66E-05 | 1197 | 0.333333 | 0.017733 | PTGS1    |
| 11094.48 | 11.3144  | -7068 | 7.44E-05 | 735  | 0.333333 | 0.009662 | MTNR1B   |
| 10342.49 | 6.313251 | -7068 | 7.57E-05 | 1094 | 0.333333 | 0.014433 | KRT5     |
| 5069.223 | 7.051726 | -7068 | 7.44E-05 | 748  | 0.333333 | 0.011808 | DIDO1    |
| 17781.77 | 7.553535 | -7068 | 7.65E-05 | 1256 | 0.333333 | 0.016548 | NDUFA9   |
| 10393.53 | 6.870485 | -7068 | 7.59E-05 | 1095 | 0.333333 | 0.016184 | IFNAR2   |
| 5608.902 | 6.721308 | -7068 | 7.39E-05 | 767  | 0.333333 | 0.008967 | TRAF2    |
| 9031.737 | 7.460892 | -7068 | 7.54E-05 | 957  | 0.333333 | 0.014263 | PTPN4    |
| 14809.35 | 5.955994 | -7068 | 7.77E-05 | 1446 | 0.333333 | 0.021621 | CTNNA1   |
| 6577.49  | 11.2745  | -7068 | 7.35E-05 | 588  | 0.333333 | 0.008267 | DAZL     |
| 6451.075 | 6.928347 | -7068 | 7.47E-05 | 864  | 0.333333 | 0.012614 | GADD45A  |
| 9370.621 | 6.629702 | -7068 | 7.58E-05 | 1049 | 0.333333 | 0.015319 | TNFAIP2  |
| 3216.048 | 6.517874 | -7068 | 7.35E-05 | 629  | 0.333333 | 0.0094   | DDX17    |
| 10720.35 | 7.400687 | -7068 | 7.56E-05 | 1034 | 0.333333 | 0.014931 | CYP7A1   |
| 7395.7   | 5.935174 | -7068 | 7.49E-05 | 983  | 0.333333 | 0.012731 | ACTB     |
| 12110.79 | 6.420857 | -7068 | 7.67E-05 | 1235 | 0.333333 | 0.018684 | NRIP1    |
| 12405.73 | 7.256188 | -7068 | 7.64E-05 | 1142 | 0.333333 | 0.01695  | TFAP2B   |
| 18720.69 | 6.469342 | -7068 | 7.82E-05 | 1517 | 0.333333 | 0.022162 | ATP6V1E1 |
| 6496.116 | 7.346592 | -7068 | 7.46E-05 | 813  | 0.333333 | 0.011063 | MIF      |
| 3579.267 | 8.11799  | -7068 | 7.32E-05 | 541  | 0.333333 | 0.007028 | ERGIC3   |
| 6667.884 | 6.413293 | -7068 | 7.50E-05 | 914  | 0.333333 | 0.013795 | SGCB     |
| 7252.54  | 6.971247 | -7068 | 7.50E-05 | 895  | 0.333333 | 0.013158 | NFE2L1   |
| 6901.463 | 8.209802 | -7068 | 7.44E-05 | 754  | 0.333333 | 0.009993 | IGFALS   |
| 7477.365 | 8.364288 | -7068 | 7.48E-05 | 800  | 0.25     | 0.01193  | IPCEF1   |
| 15942.85 | 6.521024 | -7068 | 7.76E-05 | 1386 | 0.333333 | 0.020651 | RND3     |
| 10807    | 6.195974 | -7068 | 7.64E-05 | 1183 | 0.333333 | 0.017535 | PIAS1    |
| 15943.94 | 6.454737 | -7068 | 7.75E-05 | 1403 | 0.333333 | 0.020596 | LEF1     |
| 23375.67 | 7.033174 | -7068 | 7.86E-05 | 1573 | 0.333333 | 0.022161 | SLC2A1   |
| 9332.388 | 6.158383 | -7068 | 7.55E-05 | 1083 | 0.333333 | 0.014936 | TRA2A    |
| 1329.776 | 7.613507 | -7068 | 7.22E-05 | 361  | 0.333333 | 0.005231 | MECP2    |
| 4473.682 | 7.09534  | -7068 | 7.39E-05 | 688  | 0.333333 | 0.010343 | SLC35A3  |
| 4890.423 | 10.03469 | -7068 | 7.33E-05 | 542  | 0.333333 | 0.007039 | SEMA6C   |
| 5669.106 | 6.944779 | -7068 | 7.43E-05 | 782  | 0.333333 | 0.010804 | STAT4    |
| 6077.24  | 9.505344 | -7068 | 7.39E-05 | 656  | 0.333333 | 0.009273 | SHH      |

|          |          |       |          |      |          |          |          |
|----------|----------|-------|----------|------|----------|----------|----------|
| 7490.597 | 7.211703 | -7068 | 7.51E-05 | 903  | 0.333333 | 0.013436 | TMEM109  |
| 7900.141 | 7.972352 | -7068 | 7.47E-05 | 842  | 0.333333 | 0.011613 | BSG      |
| 9366.995 | 7.210225 | -7068 | 7.55E-05 | 990  | 0.333333 | 0.014587 | FZD2     |
| 10099.84 | 5.819752 | -7068 | 7.62E-05 | 1173 | 0.333333 | 0.016273 | SSRP1    |
| 10106.59 | 7.277294 | -7068 | 7.58E-05 | 1034 | 0.333333 | 0.015771 | SH3BGR1  |
| 11987.1  | 6.725871 | -7068 | 7.62E-05 | 1168 | 0.333333 | 0.016514 | GLUD1    |
| 5395.422 | 9.081241 | -7068 | 7.36E-05 | 600  | 0.333333 | 0.007585 | MC2R     |
| 32225.73 | 5.171303 | -7068 | 8.11E-05 | 2268 | 0.333333 | 0.029489 | JUN      |
| 11298.29 | 7.260442 | -7068 | 7.63E-05 | 1104 | 0.333333 | 0.016988 | BTC      |
| 3888.853 | 7.431485 | -7068 | 7.38E-05 | 638  | 0.333333 | 0.009903 | TRIM13   |
| 4243.987 | 7.72651  | -7068 | 7.38E-05 | 642  | 0.333333 | 0.009223 | ANPEP    |
| 5144.381 | 7.741345 | -7068 | 7.40E-05 | 681  | 0.333333 | 0.009016 | ATP6AP1  |
| 14316.41 | 7.591432 | -7068 | 7.65E-05 | 1170 | 0.333333 | 0.016416 | DOK5     |
| 11564.09 | 7.815882 | -7068 | 7.57E-05 | 1013 | 0.333333 | 0.013908 | DMBT1    |
| 7738.789 | 6.143745 | -7068 | 7.51E-05 | 992  | 0.333333 | 0.01341  | CDC42    |
| 5895.865 | 8.144824 | -7068 | 7.40E-05 | 714  | 0.333333 | 0.010123 | MMP13    |
| 6627.242 | 8.488946 | -7068 | 7.43E-05 | 742  | 0.333333 | 0.010508 | ZBTB17   |
| 4239.091 | 5.943322 | -7068 | 7.44E-05 | 769  | 0.333333 | 0.012059 | LRPPRC   |
| 3188.013 | 6.767056 | -7068 | 7.35E-05 | 610  | 0.333333 | 0.009468 | MTMR9    |
| 2329.04  | 7.550499 | -7068 | 7.27E-05 | 463  | 0.333333 | 0.00582  | TNNT2    |
| 8623.98  | 8.073394 | -7068 | 7.50E-05 | 868  | 0.333333 | 0.012497 | EIF2B5   |
| 9769.987 | 6.799419 | -7068 | 7.61E-05 | 1090 | 0.333333 | 0.016882 | MYO1E    |
| 12515.7  | 7.71297  | -7068 | 7.61E-05 | 1101 | 0.333333 | 0.015747 | MKNK1    |
| 2806.313 | 8.785256 | -7068 | 7.28E-05 | 470  | 0.333333 | 0.006681 | BCL2L2   |
| 4286.586 | 8.35928  | -7068 | 7.35E-05 | 586  | 0.333333 | 0.007892 | SYN      |
| 7374.52  | 7.761144 | -7068 | 7.48E-05 | 842  | 0.333333 | 0.012409 | PPP1R16B |
| 7650.482 | 8.405186 | -7068 | 7.45E-05 | 796  | 0.333333 | 0.011164 | MAPK8IP3 |
| 4625.144 | 6.257327 | -7068 | 7.42E-05 | 765  | 0.333333 | 0.011063 | XCL1     |
| 9097.136 | 9.102948 | -7068 | 7.47E-05 | 822  | 0.333333 | 0.011659 | LHCGR    |
| 8953.453 | 8.801048 | -7068 | 7.46E-05 | 810  | 0.333333 | 0.012475 | SPAG6    |
| 7597.047 | 7.060457 | -7068 | 7.50E-05 | 897  | 0.333333 | 0.012749 | CXCL6    |
| 9346.771 | 7.222769 | -7068 | 7.56E-05 | 990  | 0.333333 | 0.014681 | DHRS7    |
| 6042.033 | 7.395699 | -7068 | 7.46E-05 | 804  | 0.333333 | 0.011956 | ETV4     |
| 5245.731 | 8.502924 | -7068 | 7.34E-05 | 608  | 0.333333 | 0.00695  | PRTN3    |
| 8009.484 | 7.112402 | -7068 | 7.50E-05 | 919  | 0.333333 | 0.012934 | IFIT3    |
| 4153.815 | 6.766857 | -7068 | 7.35E-05 | 651  | 0.25     | 0.008084 | AKR1D1   |
| 5243.7   | 6.793544 | -7068 | 7.41E-05 | 765  | 0.333333 | 0.010133 | TGFB1    |
| 20794.82 | 6.515044 | -7068 | 7.89E-05 | 1632 | 0.333333 | 0.024398 | PGD      |
| 10800.61 | 6.211125 | -7068 | 7.64E-05 | 1186 | 0.333333 | 0.017822 | TNPO1    |
| 8474.133 | 6.895956 | -7068 | 7.54E-05 | 970  | 0.333333 | 0.013868 | PHYH     |
| 6667.724 | 5.768464 | -7068 | 7.51E-05 | 957  | 0.333333 | 0.013353 | ETFA     |



|          |          |       |          |      |          |          |        |
|----------|----------|-------|----------|------|----------|----------|--------|
| 2624.405 | 7.122622 | -7068 | 7.30E-05 | 515  | 0.333333 | 0.007374 | MRPS31 |
| 6802.13  | 7.099484 | -7068 | 7.45E-05 | 811  | 0.333333 | 0.010473 | ATP5G1 |
| 11677.84 | 7.348107 | -7068 | 7.61E-05 | 1111 | 0.333333 | 0.016825 | AKAP1  |
| 7370.379 | 5.683841 | -7068 | 7.50E-05 | 1001 | 0.333333 | 0.013062 | RPL14  |
| 8205.114 | 6.704224 | -7068 | 7.54E-05 | 981  | 0.333333 | 0.014182 | BMP6   |
| 14702.9  | 6.496317 | -7068 | 7.72E-05 | 1328 | 0.333333 | 0.018669 | RAB5C  |
| 1395.345 | 8.187075 | -7068 | 7.20E-05 | 342  | 0.25     | 0.005057 | KRIT1  |
| 9418.023 | 6.104118 | -7068 | 7.57E-05 | 1122 | 0.333333 | 0.015564 | CDK6   |
| 12091.8  | 7.003996 | -7068 | 7.64E-05 | 1163 | 0.333333 | 0.016566 | ATP1A1 |
| 10877.23 | 6.676196 | -7068 | 7.63E-05 | 1140 | 0.333333 | 0.017788 | ACSL3  |
| 7615.124 | 7.451583 | -7068 | 7.49E-05 | 869  | 0.333333 | 0.01277  | HSPA4L |
| 10767.46 | 7.839857 | -7068 | 7.55E-05 | 983  | 0.333333 | 0.013931 | OSR2   |
| 7313.137 | 8.304428 | -7068 | 7.44E-05 | 783  | 0.333333 | 0.010813 | NFKBIE |
| 3550.621 | 9.625161 | -7068 | 7.28E-05 | 465  | 0.333333 | 0.005748 | PICK1  |
| 4400.485 | 5.711921 | -7068 | 7.45E-05 | 813  | 0.333333 | 0.012763 | NFE2L2 |
| 14040.33 | 7.080093 | -7068 | 7.67E-05 | 1222 | 0.333333 | 0.017686 | NEFH   |
| 4101.712 | 7.461683 | -7068 | 7.34E-05 | 609  | 0.333333 | 0.00779  | JAG2   |
| 10803.14 | 6.441094 | -7068 | 7.65E-05 | 1188 | 0.333333 | 0.018286 | TFRC   |
| 6812.651 | 6.018398 | -7068 | 7.42E-05 | 868  | 0.333333 | 0.009511 | APOA1  |
| 9692.567 | 7.080243 | -7068 | 7.58E-05 | 1043 | 0.333333 | 0.015542 | ANXA6  |
| 11347.17 | 5.946671 | -7068 | 7.65E-05 | 1246 | 0.333333 | 0.018267 | ATF2   |
| 4740.277 | 6.003927 | -7068 | 7.41E-05 | 790  | 0.333333 | 0.011065 | PSEN1  |
| 6372.637 | 9.78029  | -7068 | 7.37E-05 | 645  | 0.333333 | 0.008726 | FABP3  |
| 2099.604 | 5.961134 | -7068 | 7.28E-05 | 520  | 0.333333 | 0.007339 | DIS3   |
| 6210.192 | 6.685001 | -7068 | 7.49E-05 | 869  | 0.333333 | 0.013336 | MBD2   |
| 13932.32 | 7.288377 | -7068 | 7.68E-05 | 1216 | 0.333333 | 0.018094 | RFTN1  |
| 2415.792 | 5.342555 | -7068 | 7.34E-05 | 610  | 0.333333 | 0.009048 | PRPF4B |
| 9887.525 | 6.901929 | -7068 | 7.55E-05 | 1033 | 0.333333 | 0.013803 | PGM1   |
| 20282.92 | 5.821165 | -7068 | 7.85E-05 | 1664 | 0.333333 | 0.023423 | LAMC1  |
| 8710.377 | 10.63514 | -7068 | 7.40E-05 | 700  | 0.333333 | 0.0091   | ZNF134 |
| 11246.64 | 7.988218 | -7068 | 7.55E-05 | 1002 | 0.333333 | 0.014434 | PTCH1  |
| 7012.093 | 6.398669 | -7068 | 7.53E-05 | 953  | 0.333333 | 0.014983 | HBS1L  |
| 8916.615 | 6.69982  | -7068 | 7.57E-05 | 1028 | 0.333333 | 0.015025 | MYL12A |
| 8875.348 | 8.289687 | -7068 | 7.49E-05 | 873  | 0.333333 | 0.01256  | ZNF165 |
| 5766.202 | 6.296265 | -7068 | 7.46E-05 | 822  | 0.333333 | 0.010952 | TUFM   |
| 5961.645 | 7.291762 | -7068 | 7.42E-05 | 769  | 0.333333 | 0.009978 | ANG    |
| 8576.948 | 7.380388 | -7068 | 7.50E-05 | 898  | 0.333333 | 0.011333 | F2     |
| 12828.52 | 6.287176 | -7068 | 7.68E-05 | 1285 | 0.333333 | 0.018427 | CD36   |
| 6133.396 | 8.161256 | -7068 | 7.42E-05 | 746  | 0.333333 | 0.010668 | CHRNA5 |
| 3476.499 | 6.870992 | -7068 | 7.36E-05 | 623  | 0.333333 | 0.00972  | LYPLA1 |
| 15209.09 | 6.31139  | -7068 | 7.69E-05 | 1340 | 0.333333 | 0.017645 | GC     |

|          |          |       |          |      |          |          |          |
|----------|----------|-------|----------|------|----------|----------|----------|
| 4408.922 | 8.924846 | -7068 | 7.34E-05 | 581  | 0.333333 | 0.008151 | CTSF     |
| 7444.968 | 6.772954 | -7068 | 7.49E-05 | 910  | 0.333333 | 0.013408 | MYO6     |
| 4983.33  | 7.183514 | -7068 | 7.42E-05 | 737  | 0.333333 | 0.010845 | ATF7     |
| 6101.843 | 7.559817 | -7068 | 7.46E-05 | 777  | 0.333333 | 0.011279 | RNH1     |
| 10239.96 | 6.422892 | -7068 | 7.63E-05 | 1146 | 0.333333 | 0.017378 | CAP1     |
| 8739.806 | 6.285347 | -7068 | 7.57E-05 | 1062 | 0.333333 | 0.015902 | DUSP6    |
| 8773.771 | 5.820676 | -7068 | 7.61E-05 | 1132 | 0.333333 | 0.017104 | CNN3     |
| 2396.463 | 7.007699 | -7068 | 7.30E-05 | 508  | 0.333333 | 0.00778  | ARHGAP5  |
| 5705.605 | 10.11907 | -7068 | 7.34E-05 | 563  | 0.333333 | 0.006662 | DPEP1    |
| 3527.504 | 5.251061 | -7068 | 7.38E-05 | 735  | 0.333333 | 0.010175 | HNRNPH1  |
| 6980.921 | 6.458536 | -7068 | 7.52E-05 | 935  | 0.333333 | 0.014283 | BAZ1A    |
| 11491.46 | 6.664474 | -7068 | 7.63E-05 | 1165 | 0.333333 | 0.017227 | LPP      |
| 8389.992 | 5.705356 | -7068 | 7.53E-05 | 1084 | 0.333333 | 0.014326 | RAC1     |
| 7312.355 | 6.707775 | -7068 | 7.51E-05 | 926  | 0.333333 | 0.013942 | DSG2     |
| 4685.825 | 9.538762 | -7068 | 7.35E-05 | 579  | 0.333333 | 0.008759 | NUDT3    |
| 7744.586 | 8.204711 | -7068 | 7.46E-05 | 805  | 0.333333 | 0.011078 | DNM2     |
| 5199.679 | 7.184562 | -7068 | 7.42E-05 | 752  | 0.333333 | 0.01151  | EIF4G2   |
| 8974.619 | 6.49836  | -7068 | 7.56E-05 | 1057 | 0.333333 | 0.014962 | STAT5B   |
| 7498.265 | 7.103607 | -7068 | 7.48E-05 | 878  | 0.333333 | 0.011909 | SELE     |
| 5294.106 | 7.37036  | -7068 | 7.43E-05 | 751  | 0.333333 | 0.010847 | TCOF1    |
| 4305.236 | 7.142497 | -7068 | 7.38E-05 | 661  | 0.333333 | 0.009993 | UBQLN2   |
| 9095.206 | 6.45247  | -7068 | 7.59E-05 | 1074 | 0.333333 | 0.016277 | RIT1     |
| 9000.592 | 7.856748 | -7068 | 7.51E-05 | 927  | 0.333333 | 0.013525 | TEC      |
| 12600.11 | 6.745635 | -7068 | 7.67E-05 | 1219 | 0.333333 | 0.018099 | PRDM1    |
| 14257.01 | 6.511325 | -7068 | 7.72E-05 | 1317 | 0.333333 | 0.01975  | HSPH1    |
| 16719.71 | 7.677711 | -7068 | 7.72E-05 | 1282 | 0.333333 | 0.019008 | CTNNBIP1 |
| 25118.75 | 7.215496 | -7068 | 7.92E-05 | 1640 | 0.333333 | 0.024799 | RAPGEF1  |
| 18080.45 | 6.743831 | -7068 | 7.81E-05 | 1446 | 0.333333 | 0.022162 | GRIA1    |
| 8261.862 | 6.774763 | -7068 | 7.54E-05 | 985  | 0.333333 | 0.014307 | F5       |
| 1987.815 | 6.387254 | -7068 | 7.26E-05 | 472  | 0.333333 | 0.005885 | CD72     |
| 3772.662 | 5.614282 | -7068 | 7.40E-05 | 732  | 0.333333 | 0.010581 | CSTF1    |
| 6904.543 | 6.911887 | -7068 | 7.49E-05 | 873  | 0.333333 | 0.012607 | CYP3A5   |
| 6000.033 | 7.339915 | -7068 | 7.43E-05 | 768  | 0.333333 | 0.01058  | SLC6A4   |
| 6338.91  | 7.470985 | -7068 | 7.44E-05 | 784  | 0.333333 | 0.010523 | HMOX1    |
| 5349.419 | 6.888019 | -7068 | 7.41E-05 | 745  | 0.333333 | 0.009837 | CCL11    |
| 6221.836 | 7.390998 | -7068 | 7.44E-05 | 781  | 0.333333 | 0.010421 | IDO1     |
| 6241.014 | 8.425742 | -7068 | 7.42E-05 | 727  | 0.333333 | 0.01066  | FEZ1     |
| 10186.66 | 7.976196 | -7068 | 7.52E-05 | 939  | 0.333333 | 0.013346 | TMPRSS2  |
| 6890.628 | 6.53024  | -7068 | 7.51E-05 | 906  | 0.333333 | 0.013929 | TFAM     |
| 14202.26 | 7.010243 | -7068 | 7.70E-05 | 1251 | 0.333333 | 0.018562 | EFHD1    |
| 9205.503 | 8.000121 | -7068 | 7.51E-05 | 904  | 0.333333 | 0.012997 | COL9A1   |

|          |          |       |          |      |          |          |         |
|----------|----------|-------|----------|------|----------|----------|---------|
| 9902.646 | 6.419743 | -7068 | 7.64E-05 | 1146 | 0.333333 | 0.01818  | LRRFIP1 |
| 4223.184 | 7.838864 | -7068 | 7.37E-05 | 629  | 0.333333 | 0.009078 | VPS39   |
| 27042.55 | 6.423567 | -7068 | 8.01E-05 | 1838 | 0.333333 | 0.027363 | BMP2    |
| 7733.958 | 8.868004 | -7068 | 7.43E-05 | 755  | 0.333333 | 0.010307 | ANKRD1  |
| 10919.8  | 7.271602 | -7068 | 7.58E-05 | 1062 | 0.333333 | 0.01542  | ATP1B1  |
| 2681.3   | 9.539104 | -7068 | 7.27E-05 | 437  | 0.333333 | 0.006355 | MLH3    |
| 6563.959 | 6.82478  | -7068 | 7.45E-05 | 833  | 0.333333 | 0.010792 | C9      |
| 17658.8  | 7.434824 | -7068 | 7.75E-05 | 1339 | 0.333333 | 0.019962 | MTCL1   |
| 10640.75 | 8.024125 | -7068 | 7.56E-05 | 983  | 0.333333 | 0.013725 | PCK2    |
| 7268.048 | 7.718695 | -7068 | 7.47E-05 | 840  | 0.333333 | 0.012245 | CCNA1   |
| 31256.89 | 7.119482 | -7068 | 8.03E-05 | 1834 | 0.333333 | 0.027366 | GFRA1   |
| 8706.566 | 7.444642 | -7068 | 7.54E-05 | 954  | 0.333333 | 0.014235 | SLC7A5  |
| 12449.89 | 5.889316 | -7068 | 7.64E-05 | 1261 | 0.333333 | 0.016656 | ATP5A1  |
| 5997.057 | 6.487214 | -7068 | 7.49E-05 | 866  | 0.333333 | 0.013513 | TMEM47  |
| 7039.144 | 7.821302 | -7068 | 7.47E-05 | 827  | 0.333333 | 0.011973 | AFP     |
| 3360.331 | 9.622236 | -7068 | 7.30E-05 | 483  | 0.333333 | 0.006425 | BRF1    |
| 2985.226 | 7.179429 | -7068 | 7.31E-05 | 541  | 0.333333 | 0.00705  | RAB11B  |
| 10251.59 | 8.46859  | -7068 | 7.46E-05 | 862  | 0.333333 | 0.010328 | NDUFV1  |
| 5755.491 | 7.549823 | -7068 | 7.45E-05 | 760  | 0.333333 | 0.010964 | CRIP2   |
| 17443.88 | 7.456143 | -7068 | 7.73E-05 | 1317 | 0.333333 | 0.018957 | TG      |
| 9395.422 | 6.225087 | -7068 | 7.60E-05 | 1113 | 0.333333 | 0.016912 | RBM25   |
| 2828.706 | 9.974937 | -7068 | 7.25E-05 | 406  | 0.25     | 0.005429 | DNALI1  |
| 5859.313 | 9.874131 | -7068 | 7.36E-05 | 612  | 0.333333 | 0.007907 | DNASE2  |
| 6641.314 | 5.832087 | -7068 | 7.48E-05 | 909  | 0.333333 | 0.011696 | NCF2    |
| 3117.131 | 7.474663 | -7068 | 7.32E-05 | 542  | 0.333333 | 0.007464 | CRH     |
| 4905.142 | 7.815578 | -7068 | 7.41E-05 | 685  | 0.333333 | 0.009893 | LRPAP1  |
| 4647.899 | 7.943183 | -7068 | 7.37E-05 | 648  | 0.333333 | 0.009015 | P2RX7   |
| 6712.225 | 6.610609 | -7068 | 7.49E-05 | 893  | 0.333333 | 0.013062 | RAD51C  |
| 4242.047 | 9.195035 | -7068 | 7.32E-05 | 530  | 0.333333 | 0.00675  | RLBP1   |
| 13155.88 | 6.582076 | -7068 | 7.68E-05 | 1256 | 0.333333 | 0.018225 | ACO1    |
| 6294.484 | 7.833637 | -7068 | 7.46E-05 | 784  | 0.333333 | 0.011957 | SCML2   |
| 8979.523 | 6.168654 | -7068 | 7.56E-05 | 1073 | 0.333333 | 0.014871 | CAT     |
| 7831.509 | 6.235974 | -7068 | 7.53E-05 | 984  | 0.333333 | 0.014176 | GEM     |
| 5920.122 | 8.628054 | -7068 | 7.42E-05 | 695  | 0.333333 | 0.010345 | NAT1    |
| 40550.08 | 7.085244 | -7068 | 8.17E-05 | 2078 | 0.333333 | 0.030558 | MUC1    |
| 5372.4   | 7.441295 | -7068 | 7.42E-05 | 738  | 0.333333 | 0.0104   | PAX5    |
| 14155.49 | 5.091291 | -7068 | 7.73E-05 | 1492 | 0.333333 | 0.019653 | MCM6    |
| 12569.19 | 6.092408 | -7068 | 7.71E-05 | 1315 | 0.333333 | 0.019804 | PAICS   |
| 5504.371 | 6.44283  | -7068 | 7.42E-05 | 791  | 0.333333 | 0.010333 | ALB     |
| 6213.4   | 7.832324 | -7068 | 7.45E-05 | 783  | 0.333333 | 0.011809 | OAZ2    |
| 2817.235 | 6.928601 | -7068 | 7.32E-05 | 552  | 0.333333 | 0.0074   | ERCC1   |

|          |          |       |          |      |          |          |          |
|----------|----------|-------|----------|------|----------|----------|----------|
| 9307.043 | 8.123101 | -7068 | 7.53E-05 | 915  | 0.333333 | 0.013425 | ACSM3    |
| 10973.83 | 7.581588 | -7068 | 7.58E-05 | 1032 | 0.333333 | 0.014859 | CACNA2D1 |
| 4731.137 | 8.807864 | -7068 | 7.35E-05 | 599  | 0.333333 | 0.00807  | PRSS16   |
| 24805.72 | 6.557055 | -7068 | 7.96E-05 | 1735 | 0.333333 | 0.025899 | SUCLG2   |
| 8349.044 | 7.167291 | -7068 | 7.51E-05 | 949  | 0.333333 | 0.013105 | MAPK13   |
| 6061.487 | 7.736337 | -7068 | 7.44E-05 | 771  | 0.333333 | 0.011384 | ATP6V0A2 |
| 7187.58  | 5.652867 | -7068 | 7.54E-05 | 1019 | 0.333333 | 0.014422 | VWF      |
| 3191.725 | 5.74305  | -7068 | 7.37E-05 | 674  | 0.333333 | 0.009974 | PNN      |
| 8081.053 | 4.949369 | -7068 | 7.56E-05 | 1145 | 0.333333 | 0.01499  | SRSF3    |
| 6328.76  | 6.24112  | -7068 | 7.46E-05 | 862  | 0.333333 | 0.011703 | AEBP1    |
| 5902.176 | 7.254243 | -7068 | 7.44E-05 | 794  | 0.333333 | 0.011578 | EEF1D    |
| 5230.773 | 6.232973 | -7068 | 7.44E-05 | 820  | 0.333333 | 0.012081 | COL4A5   |
| 16333.43 | 6.557072 | -7068 | 7.77E-05 | 1412 | 0.333333 | 0.021072 | TRIO     |
| 5198.875 | 5.45487  | -7068 | 7.41E-05 | 817  | 0.333333 | 0.009867 | CCL5     |
| 7784.367 | 6.396944 | -7068 | 7.53E-05 | 987  | 0.333333 | 0.013687 | ACAT1    |
| 6273.256 | 8.855252 | -7068 | 7.38E-05 | 665  | 0.333333 | 0.008327 | APOA4    |
| 7346.405 | 7.839878 | -7068 | 7.48E-05 | 847  | 0.333333 | 0.012071 | FXN      |
| 5425.168 | 7.502043 | -7068 | 7.39E-05 | 695  | 0.333333 | 0.008951 | SPRR1B   |
| 4809.189 | 9.030404 | -7068 | 7.36E-05 | 586  | 0.333333 | 0.007689 | PNPLA2   |
| 12045.86 | 6.457592 | -7068 | 7.66E-05 | 1217 | 0.333333 | 0.018216 | CDK14    |
| 6609.769 | 6.536518 | -7068 | 7.48E-05 | 876  | 0.333333 | 0.012542 | LSM3     |
| 5829.015 | 8.787993 | -7068 | 7.39E-05 | 679  | 0.333333 | 0.010034 | PCP4     |
| 8124.371 | 6.721582 | -7068 | 7.51E-05 | 958  | 0.333333 | 0.012912 | GPX3     |
| 13607.52 | 7.333065 | -7068 | 7.68E-05 | 1202 | 0.333333 | 0.017519 | LMNB2    |
| 6671.676 | 8.553798 | -7068 | 7.39E-05 | 699  | 0.333333 | 0.008878 | NDUFA7   |
| 5702.418 | 6.452052 | -7068 | 7.49E-05 | 856  | 0.333333 | 0.013735 | NAB1     |
| 3989.005 | 8.098051 | -7068 | 7.36E-05 | 600  | 0.333333 | 0.008559 | MGAT3    |
| 5215.84  | 7.141582 | -7068 | 7.42E-05 | 749  | 0.333333 | 0.010755 | CDK13    |
| 4539.675 | 6.669417 | -7068 | 7.42E-05 | 723  | 0.333333 | 0.010538 | LYZ      |
| 4829.03  | 7.440788 | -7068 | 7.39E-05 | 693  | 0.333333 | 0.010063 | L1CAM    |
| 9213.565 | 9.452858 | -7068 | 7.44E-05 | 778  | 0.333333 | 0.010518 | PITX2    |
| 6844.545 | 6.392215 | -7068 | 7.54E-05 | 941  | 0.333333 | 0.015032 | WAPL     |
| 6912.648 | 7.794788 | -7068 | 7.46E-05 | 795  | 0.333333 | 0.01122  | ISG20    |
| 10466.91 | 6.947432 | -7068 | 7.59E-05 | 1064 | 0.333333 | 0.01532  | TGFB3    |
| 17248.43 | 5.626165 | -7068 | 7.78E-05 | 1547 | 0.333333 | 0.021064 | MAD2L1   |
| 8046.374 | 8.066681 | -7068 | 7.48E-05 | 846  | 0.333333 | 0.012303 | SH3GL3   |
| 10303.53 | 5.76049  | -7068 | 7.63E-05 | 1212 | 0.333333 | 0.017922 | CSNK1A1  |
| 13348.22 | 6.232759 | -7068 | 7.65E-05 | 1269 | 0.333333 | 0.016451 | F9       |
| 3875.105 | 10.04282 | -7068 | 7.30E-05 | 488  | 0.333333 | 0.00675  | HAS1     |
| 5457.916 | 7.18599  | -7068 | 7.45E-05 | 770  | 0.333333 | 0.011752 | DCTN5    |
| 6945.643 | 7.980398 | -7068 | 7.45E-05 | 779  | 0.333333 | 0.010959 | REG3A    |

|          |          |       |          |      |          |          |         |
|----------|----------|-------|----------|------|----------|----------|---------|
| 8055.273 | 7.732059 | -7068 | 7.46E-05 | 821  | 0.333333 | 0.010612 | SLC22A6 |
| 10190.17 | 5.564876 | -7068 | 7.64E-05 | 1234 | 0.333333 | 0.01787  | TNFAIP3 |
| 9964.831 | 7.31858  | -7068 | 7.55E-05 | 1011 | 0.333333 | 0.014367 | CYP26A1 |
| 5149.146 | 10.55236 | -7068 | 7.33E-05 | 535  | 0.333333 | 0.006807 | DRD4    |
| 5595.55  | 6.98086  | -7068 | 7.42E-05 | 781  | 0.333333 | 0.011192 | CR1     |
| 6929.604 | 8.776843 | -7068 | 7.41E-05 | 705  | 0.333333 | 0.008994 | NPPB    |
| 14514.22 | 6.037829 | -7068 | 7.75E-05 | 1412 | 0.333333 | 0.02154  | CDH2    |
| 3133.139 | 6.225996 | -7068 | 7.31E-05 | 581  | 0.333333 | 0.006893 | TTPA    |
| 4149.754 | 7.486457 | -7068 | 7.38E-05 | 645  | 0.333333 | 0.009387 | BTG2    |
| 9090.521 | 7.307536 | -7068 | 7.56E-05 | 984  | 0.333333 | 0.01492  | CHRM3   |
| 7556.155 | 6.970854 | -7068 | 7.50E-05 | 905  | 0.333333 | 0.01314  | PDK4    |
| 11169.29 | 6.051854 | -7068 | 7.67E-05 | 1241 | 0.333333 | 0.019281 | PICALM  |
| 8484.278 | 5.680127 | -7068 | 7.57E-05 | 1093 | 0.333333 | 0.015688 | LAMB1   |
| 4054.461 | 7.267379 | -7068 | 7.38E-05 | 658  | 0.333333 | 0.009994 | PHTF1   |
| 8318.766 | 6.584731 | -7068 | 7.54E-05 | 995  | 0.333333 | 0.014528 | STK17B  |
| 6887.608 | 6.024826 | -7068 | 7.54E-05 | 972  | 0.333333 | 0.014944 | DLAT    |
| 11359.59 | 7.510181 | -7068 | 7.59E-05 | 1055 | 0.333333 | 0.014383 | CDA     |
| 10771.96 | 6.305709 | -7068 | 7.62E-05 | 1178 | 0.333333 | 0.016922 | MET     |
| 14888.08 | 5.854383 | -7068 | 7.75E-05 | 1450 | 0.333333 | 0.020792 | IQGAP1  |
| 4897.59  | 6.467751 | -7068 | 7.43E-05 | 787  | 0.333333 | 0.011813 | ADH5    |
| 5491.164 | 6.034608 | -7068 | 7.49E-05 | 879  | 0.333333 | 0.013556 | SON     |
| 2718.115 | 8.916042 | -7068 | 7.27E-05 | 441  | 0.333333 | 0.005611 | GTPBP6  |
| 3539.973 | 8.8551   | -7068 | 7.30E-05 | 501  | 0.333333 | 0.006036 | NPHS1   |
| 5076.075 | 6.282663 | -7068 | 7.47E-05 | 827  | 0.333333 | 0.013232 | ACP1    |
| 13843.73 | 7.074781 | -7068 | 7.67E-05 | 1223 | 0.333333 | 0.018189 | IL15    |
| 7008.105 | 12.2501  | -7068 | 7.32E-05 | 528  | 0.333333 | 0.006107 | VGF     |
| 8784.023 | 7.291303 | -7068 | 7.53E-05 | 956  | 0.333333 | 0.01389  | DUSP4   |
| 9884.435 | 7.839361 | -7068 | 7.55E-05 | 961  | 0.333333 | 0.013947 | TMED3   |
| 17533.74 | 6.124411 | -7068 | 7.85E-05 | 1547 | 0.333333 | 0.024068 | MAN1A1  |
| 3839.699 | 6.351002 | -7068 | 7.34E-05 | 633  | 0.333333 | 0.007681 | COX7C   |
| 7772.224 | 7.123719 | -7068 | 7.44E-05 | 785  | 0.333333 | 0.011829 | MPPED2  |
| 8048.685 | 7.109802 | -7068 | 7.52E-05 | 929  | 0.333333 | 0.013211 | ENG     |
| 4274.651 | 6.29658  | -7068 | 7.44E-05 | 754  | 0.333333 | 0.011918 | TOMM20  |
| 3551.023 | 8.7081   | -7068 | 7.33E-05 | 539  | 0.333333 | 0.00781  | ATN1    |
| 5343.252 | 6.506578 | -7068 | 7.46E-05 | 814  | 0.333333 | 0.01192  | SHMT2   |
| 4132.357 | 9.839227 | -7068 | 7.32E-05 | 521  | 0.333333 | 0.007054 | SLC6A8  |
| 3578.12  | 6.431098 | -7068 | 7.35E-05 | 625  | 0.333333 | 0.008035 | IDH3G   |
| 5473.041 | 7.342584 | -7068 | 7.41E-05 | 738  | 0.333333 | 0.010301 | MYOC    |
| 7689.762 | 7.062973 | -7068 | 7.47E-05 | 868  | 0.333333 | 0.011429 | DSG3    |
| 6983.586 | 5.792903 | -7068 | 7.47E-05 | 942  | 0.333333 | 0.011605 | CYP2C8  |
| 7305.09  | 7.467522 | -7068 | 7.50E-05 | 876  | 0.333333 | 0.012496 | GLA     |

|          |          |       |          |      |          |          |          |
|----------|----------|-------|----------|------|----------|----------|----------|
| 8736.823 | 8.027084 | -7068 | 7.50E-05 | 883  | 0.333333 | 0.012832 | CARTPT   |
| 16639.93 | 6.042285 | -7068 | 7.79E-05 | 1508 | 0.333333 | 0.021672 | FLNB     |
| 4396.583 | 7.423789 | -7068 | 7.39E-05 | 676  | 0.333333 | 0.010176 | SLC11A2  |
| 6578.47  | 7.190232 | -7068 | 7.48E-05 | 850  | 0.333333 | 0.012997 | LIG3     |
| 20851.99 | 6.257288 | -7068 | 7.83E-05 | 1603 | 0.333333 | 0.021916 | SERPINA1 |
| 44526.54 | 6.933492 | -7068 | 8.30E-05 | 2241 | 0.333333 | 0.034412 | AUTS2    |
| 10255.09 | 6.779907 | -7068 | 7.63E-05 | 1110 | 0.333333 | 0.017136 | RASGRP1  |
| 7094.71  | 7.986742 | -7068 | 7.46E-05 | 800  | 0.333333 | 0.01127  | SEMA4D   |
| 6103.921 | 7.268652 | -7068 | 7.44E-05 | 786  | 0.333333 | 0.011106 | C14orf2  |
| 16035.28 | 6.692499 | -7068 | 7.76E-05 | 1386 | 0.333333 | 0.020574 | DNAJA1   |
| 12863.05 | 6.230971 | -7068 | 7.64E-05 | 1250 | 0.333333 | 0.016814 | MBL2     |
| 3876.139 | 6.277896 | -7068 | 7.40E-05 | 712  | 0.333333 | 0.010695 | PTPN22   |
| 5674.612 | 7.454053 | -7068 | 7.43E-05 | 760  | 0.333333 | 0.011861 | ZKSCAN1  |
| 10349.62 | 5.984765 | -7068 | 7.64E-05 | 1198 | 0.333333 | 0.01775  | MAPRE1   |
| 7457.005 | 8.573889 | -7068 | 7.45E-05 | 768  | 0.333333 | 0.010901 | DRD2     |
| 7211.916 | 7.84547  | -7068 | 7.47E-05 | 821  | 0.333333 | 0.012218 | MRPS14   |
| 6262.688 | 8.436231 | -7068 | 7.41E-05 | 705  | 0.25     | 0.009735 | SLC5A1   |
| 3603.327 | 7.808394 | -7068 | 7.32E-05 | 551  | 0.333333 | 0.007313 | BSN      |
| 3928.048 | 7.943279 | -7068 | 7.36E-05 | 605  | 0.333333 | 0.009176 | RPGR     |
| 15343.19 | 7.116809 | -7068 | 7.71E-05 | 1274 | 0.333333 | 0.018681 | LOXL1    |
| 3582.949 | 6.43772  | -7068 | 7.36E-05 | 661  | 0.333333 | 0.009266 | CTBP1    |
| 4943.661 | 9.391658 | -7068 | 7.35E-05 | 576  | 0.333333 | 0.00768  | RUNDC3A  |
| 10571.89 | 6.183059 | -7068 | 7.64E-05 | 1177 | 0.333333 | 0.017698 | CAPZA2   |
| 4795.216 | 6.916692 | -7068 | 7.42E-05 | 732  | 0.333333 | 0.010976 | OAS1     |
| 9112.033 | 7.017695 | -7068 | 7.56E-05 | 1010 | 0.333333 | 0.014947 | CDKL5    |
| 10850.61 | 7.012021 | -7068 | 7.56E-05 | 1042 | 0.333333 | 0.013585 | UQCRC1   |
| 12137.1  | 6.918635 | -7068 | 7.66E-05 | 1172 | 0.333333 | 0.018096 | ATP8A2   |
| 7070.616 | 10.94598 | -7068 | 7.37E-05 | 613  | 0.333333 | 0.00806  | PLA2G6   |
| 7607.826 | 8.456822 | -7068 | 7.43E-05 | 779  | 0.333333 | 0.010047 | FDXR     |
| 5482.885 | 9.427899 | -7068 | 7.37E-05 | 610  | 0.333333 | 0.008656 | MAS1     |
| 11860.02 | 6.162806 | -7068 | 7.70E-05 | 1261 | 0.333333 | 0.019424 | SCARB2   |
| 13781.8  | 6.931247 | -7068 | 7.70E-05 | 1255 | 0.333333 | 0.019557 | OTUD4    |
| 4038.328 | 8.514542 | -7068 | 7.35E-05 | 593  | 0.333333 | 0.008536 | PATZ1    |
| 3495.605 | 7.568286 | -7068 | 7.34E-05 | 595  | 0.333333 | 0.008512 | BCL2L11  |
| 12438.66 | 5.020071 | -7068 | 7.73E-05 | 1458 | 0.333333 | 0.020143 | HNRNPM   |
| 6659.103 | 6.995482 | -7068 | 7.49E-05 | 856  | 0.333333 | 0.013449 | REEP1    |
| 7994.934 | 8.298193 | -7068 | 7.45E-05 | 806  | 0.333333 | 0.01051  | LEP      |
| 7103.183 | 7.119541 | -7068 | 7.50E-05 | 887  | 0.333333 | 0.013347 | PPP3R1   |
| 2900.655 | 5.731048 | -7068 | 7.34E-05 | 626  | 0.333333 | 0.008983 | ASF1A    |
| 7397.914 | 6.787689 | -7068 | 7.52E-05 | 924  | 0.333333 | 0.013511 | MAOB     |
| 2485.869 | 6.258055 | -7068 | 7.31E-05 | 563  | 0.333333 | 0.008401 | KRR1     |

|          |          |       |          |      |          |          |         |
|----------|----------|-------|----------|------|----------|----------|---------|
| 6359.023 | 6.054159 | -7068 | 7.46E-05 | 878  | 0.333333 | 0.011703 | TAGLN   |
| 2492.886 | 9.109665 | -7068 | 7.27E-05 | 432  | 0.333333 | 0.005935 | ACHE    |
| 8592.01  | 7.514484 | -7068 | 7.53E-05 | 943  | 0.333333 | 0.013808 | AMMECR1 |
| 11923.09 | 7.397767 | -7068 | 7.55E-05 | 1056 | 0.333333 | 0.013432 | TK1     |
| 23761.51 | 6.976844 | -7068 | 7.92E-05 | 1631 | 0.333333 | 0.025013 | ADGRL3  |
| 9280.032 | 6.445937 | -7068 | 7.58E-05 | 1066 | 0.333333 | 0.015013 | TUBA1B  |
| 4097.692 | 8.980657 | -7068 | 7.33E-05 | 548  | 0.25     | 0.007066 | DGAT1   |
| 6271.164 | 7.112698 | -7068 | 7.46E-05 | 823  | 0.333333 | 0.012096 | PTK7    |
| 5699.573 | 8.734217 | -7068 | 7.39E-05 | 655  | 0.333333 | 0.00922  | DNAH9   |
| 7900.334 | 5.832021 | -7068 | 7.50E-05 | 1030 | 0.333333 | 0.012973 | STAT1   |
| 15610.93 | 8.444462 | -7068 | 7.60E-05 | 1113 | 0.333333 | 0.014238 | COX8A   |
| 17055.24 | 7.711075 | -7068 | 7.71E-05 | 1266 | 0.333333 | 0.018647 | GREM1   |
| 7614.041 | 6.869795 | -7068 | 7.52E-05 | 926  | 0.333333 | 0.014217 | ZFR     |
| 6720.723 | 8.140745 | -7068 | 7.46E-05 | 789  | 0.333333 | 0.012026 | GGH     |
| 7966.415 | 7.463823 | -7068 | 7.50E-05 | 885  | 0.333333 | 0.01233  | CIB1    |
| 9981.203 | 7.15791  | -7068 | 7.55E-05 | 1016 | 0.333333 | 0.013416 | ETFB    |
| 5857.019 | 8.46724  | -7068 | 7.41E-05 | 712  | 0.333333 | 0.010574 | DCLRE1A |
| 3140.083 | 9.464079 | -7068 | 7.29E-05 | 469  | 0.333333 | 0.006579 | ZNF142  |
| 5048.736 | 7.12949  | -7068 | 7.41E-05 | 725  | 0.333333 | 0.01041  | LAMTOR5 |
| 3080.827 | 8.592538 | -7068 | 7.31E-05 | 505  | 0.333333 | 0.006874 | ZMYM3   |
| 6586.901 | 5.763916 | -7068 | 7.52E-05 | 971  | 0.333333 | 0.014175 | TMX1    |
| 4513.144 | 7.766509 | -7068 | 7.40E-05 | 664  | 0.333333 | 0.010117 | JADE3   |
| 3858.327 | 9.076251 | -7068 | 7.32E-05 | 531  | 0.333333 | 0.007022 | SNRNP35 |
| 5470.866 | 7.146312 | -7068 | 7.42E-05 | 779  | 0.333333 | 0.010644 | CDKN2A  |
| 5730.176 | 9.251087 | -7068 | 7.36E-05 | 620  | 0.333333 | 0.007585 | NR5A1   |
| 8417.912 | 6.41823  | -7068 | 7.56E-05 | 1027 | 0.333333 | 0.015045 | AXL     |
| 8747.173 | 6.195259 | -7068 | 7.58E-05 | 1061 | 0.333333 | 0.015561 | LTBP2   |
| 9923.549 | 9.980723 | -7068 | 7.46E-05 | 775  | 0.333333 | 0.01003  | MDFI    |
| 8202.762 | 7.349755 | -7068 | 7.50E-05 | 900  | 0.333333 | 0.012015 | MAP2K2  |
| 2661.523 | 8.252301 | -7068 | 7.26E-05 | 446  | 0.333333 | 0.005199 | TGM1    |
| 7091.688 | 6.842146 | -7068 | 7.49E-05 | 892  | 0.333333 | 0.012735 | PRKAA2  |
| 7309.129 | 6.632308 | -7068 | 7.52E-05 | 954  | 0.333333 | 0.013798 | CCND1   |
| 5218.181 | 6.829035 | -7068 | 7.42E-05 | 770  | 0.333333 | 0.010929 | FGFR3   |
| 5471.069 | 8.69038  | -7068 | 7.40E-05 | 674  | 0.333333 | 0.010117 | PADI2   |
| 3028.552 | 6.812027 | -7068 | 7.32E-05 | 565  | 0.333333 | 0.007584 | AIM2    |
| 3720.722 | 10.34521 | -7068 | 7.30E-05 | 470  | 0.333333 | 0.005784 | SNAPC2  |
| 4897.12  | 8.823405 | -7068 | 7.38E-05 | 625  | 0.333333 | 0.008444 | TERT    |
| 2837.153 | 9.030104 | -7068 | 7.29E-05 | 461  | 0.333333 | 0.006221 | COG7    |
| 23822.89 | 5.971585 | -7068 | 7.95E-05 | 1797 | 0.333333 | 0.025874 | TPM1    |
| 12175.95 | 7.144494 | -7068 | 7.60E-05 | 1110 | 0.333333 | 0.015337 | CSTA    |
| 10751.23 | 6.213941 | -7068 | 7.65E-05 | 1199 | 0.333333 | 0.018184 | APLP2   |

|          |          |       |          |      |          |          |          |
|----------|----------|-------|----------|------|----------|----------|----------|
| 6076.4   | 7.772781 | -7068 | 7.44E-05 | 764  | 0.333333 | 0.010895 | IGFBP2   |
| 7274.084 | 5.979684 | -7068 | 7.54E-05 | 1004 | 0.333333 | 0.014569 | AK2      |
| 5485.092 | 9.583386 | -7068 | 7.36E-05 | 606  | 0.333333 | 0.007758 | SAC3D1   |
| 5088.69  | 6.219389 | -7068 | 7.40E-05 | 793  | 0.333333 | 0.010625 | RIPK1    |
| 2903.746 | 9.599145 | -7068 | 7.28E-05 | 441  | 0.333333 | 0.006332 | B4GALNT1 |
| 10462.79 | 7.816895 | -7068 | 7.56E-05 | 988  | 0.333333 | 0.014558 | NTF3     |
| 15529.11 | 7.03111  | -7068 | 7.73E-05 | 1320 | 0.333333 | 0.019657 | ANXA1    |
| 4611.865 | 7.605595 | -7068 | 7.38E-05 | 667  | 0.333333 | 0.009352 | PDCD11   |
| 8495.4   | 7.686354 | -7068 | 7.53E-05 | 919  | 0.333333 | 0.01421  | CREG1    |
| 7342.681 | 8.929626 | -7068 | 7.43E-05 | 743  | 0.333333 | 0.010052 | LLGL2    |
| 11291.04 | 7.491507 | -7068 | 7.61E-05 | 1065 | 0.333333 | 0.016384 | EPCAM    |
| 5838.165 | 6.760273 | -7068 | 7.45E-05 | 814  | 0.333333 | 0.011648 | HIBCH    |
| 8823.772 | 7.625605 | -7068 | 7.54E-05 | 939  | 0.333333 | 0.014042 | P2RX4    |
| 2958.309 | 8.170959 | -7068 | 7.28E-05 | 481  | 0.333333 | 0.006021 | CLCA1    |
| 13744.01 | 6.289464 | -7068 | 7.73E-05 | 1344 | 0.333333 | 0.020338 | NREP     |
| 4187.669 | 7.335157 | -7068 | 7.39E-05 | 668  | 0.333333 | 0.010224 | MBTPS1   |
| 11023.09 | 5.691007 | -7068 | 7.65E-05 | 1254 | 0.333333 | 0.017856 | CTGF     |
| 8442.077 | 8.590733 | -7068 | 7.48E-05 | 831  | 0.333333 | 0.011959 | NTHL1    |
| 10397.86 | 7.686483 | -7068 | 7.58E-05 | 1006 | 0.333333 | 0.014795 | NPC2     |
| 3406.394 | 7.180998 | -7068 | 7.34E-05 | 594  | 0.333333 | 0.008617 | CHM      |
| 4180.431 | 6.672489 | -7068 | 7.41E-05 | 710  | 0.333333 | 0.01125  | DNAJB6   |
| 9219.425 | 7.048658 | -7068 | 7.51E-05 | 950  | 0.333333 | 0.011763 | ECHS1    |
| 6994.502 | 8.304734 | -7068 | 7.45E-05 | 773  | 0.333333 | 0.012007 | ARMCX2   |
| 2608.86  | 8.642137 | -7068 | 7.27E-05 | 445  | 0.333333 | 0.005665 | SDR39U1  |
| 4886.151 | 6.87858  | -7068 | 7.41E-05 | 740  | 0.333333 | 0.010577 | XIAP     |
| 10482.03 | 5.747991 | -7068 | 7.58E-05 | 1176 | 0.333333 | 0.014663 | BUB1B    |
| 3855.521 | 9.231809 | -7068 | 7.31E-05 | 520  | 0.333333 | 0.006992 | SLC6A1   |
| 5368.198 | 8.176382 | -7068 | 7.41E-05 | 694  | 0.333333 | 0.010186 | CBFA2T3  |
| 5178.434 | 6.652338 | -7068 | 7.45E-05 | 798  | 0.333333 | 0.012065 | SOCS2    |
| 9740.14  | 5.799389 | -7068 | 7.58E-05 | 1149 | 0.333333 | 0.015473 | SRSF6    |
| 4000.28  | 7.284245 | -7068 | 7.35E-05 | 623  | 0.333333 | 0.008812 | DAP3     |
| 4836.218 | 6.74838  | -7068 | 7.39E-05 | 716  | 0.333333 | 0.009432 | MRPL23   |
| 14148.69 | 8.788252 | -7068 | 7.57E-05 | 1032 | 0.333333 | 0.014202 | PGF      |
| 8036.252 | 7.039089 | -7068 | 7.52E-05 | 935  | 0.333333 | 0.013922 | NOTCH2   |
| 5363.665 | 8.487048 | -7068 | 7.38E-05 | 663  | 0.333333 | 0.009406 | HOXB2    |
| 26911.1  | 6.867392 | -7068 | 7.93E-05 | 1729 | 0.333333 | 0.024794 | BHLHE40  |
| 15320.71 | 6.088356 | -7068 | 7.78E-05 | 1436 | 0.333333 | 0.021834 | DLG1     |
| 7160.88  | 9.753317 | -7068 | 7.37E-05 | 664  | 0.25     | 0.008367 | LCN2     |
| 12589.41 | 7.562574 | -7068 | 7.62E-05 | 1108 | 0.333333 | 0.015871 | FGL1     |
| 30989.14 | 7.741705 | -7068 | 7.95E-05 | 1761 | 0.333333 | 0.025808 | PRKCE    |
| 5301.7   | 6.679595 | -7068 | 7.45E-05 | 795  | 0.333333 | 0.012174 | PSIP1    |



|          |          |       |          |      |          |          |           |
|----------|----------|-------|----------|------|----------|----------|-----------|
| 7382.014 | 6.921401 | -7068 | 7.50E-05 | 895  | 0.333333 | 0.012921 | GABARAPL1 |
| 7318.381 | 6.848535 | -7068 | 7.50E-05 | 895  | 0.333333 | 0.012281 | RGN       |
| 3011.725 | 7.86016  | -7068 | 7.31E-05 | 530  | 0.333333 | 0.007609 | CACNB3    |
| 5143.7   | 7.867179 | -7068 | 7.40E-05 | 683  | 0.333333 | 0.010442 | MRFAP1L1  |
| 12927.44 | 7.375854 | -7068 | 7.63E-05 | 1146 | 0.333333 | 0.016945 | VSNL1     |
| 5704.004 | 6.753543 | -7068 | 7.44E-05 | 793  | 0.333333 | 0.010796 | AIFM1     |
| 6513.687 | 7.631637 | -7068 | 7.46E-05 | 796  | 0.333333 | 0.011329 | CCR6      |
| 5482.75  | 8.530769 | -7068 | 7.40E-05 | 672  | 0.333333 | 0.009407 | TST       |
| 4937.765 | 6.522433 | -7068 | 7.39E-05 | 744  | 0.333333 | 0.009542 | BCL2L1    |
| 11752.26 | 7.841965 | -7068 | 7.60E-05 | 1067 | 0.333333 | 0.015754 | UBB       |
| 5240.933 | 7.5667   | -7068 | 7.36E-05 | 655  | 0.333333 | 0.007482 | S100A12   |
| 7491.54  | 6.769628 | -7068 | 7.53E-05 | 942  | 0.333333 | 0.014447 | GLS       |
| 12709.25 | 6.682937 | -7068 | 7.68E-05 | 1228 | 0.333333 | 0.018411 | PDHB      |
| 6614.835 | 9.720085 | -7068 | 7.38E-05 | 638  | 0.333333 | 0.008303 | FUT5      |
| 14373.98 | 6.406584 | -7068 | 7.70E-05 | 1327 | 0.333333 | 0.019223 | SNRPA1    |
| 5273.467 | 6.831572 | -7068 | 7.42E-05 | 769  | 0.333333 | 0.011099 | BCL10     |
| 4567.931 | 7.915425 | -7068 | 7.38E-05 | 654  | 0.333333 | 0.009462 | POLB      |
| 16942.78 | 6.029611 | -7068 | 7.77E-05 | 1505 | 0.333333 | 0.020908 | PRKCA     |
| 8807.46  | 6.825792 | -7068 | 7.53E-05 | 1000 | 0.333333 | 0.014219 | FHL2      |
| 4361.606 | 8.560522 | -7068 | 7.36E-05 | 593  | 0.333333 | 0.008124 | TSC22D4   |
| 4030.752 | 6.286901 | -7068 | 7.39E-05 | 693  | 0.333333 | 0.010035 | UFD1L     |
| 8198.635 | 8.109854 | -7068 | 7.48E-05 | 849  | 0.333333 | 0.011715 | TRIM21    |
| 14836.66 | 6.669422 | -7068 | 7.69E-05 | 1300 | 0.333333 | 0.018627 | COL11A1   |
| 4600.777 | 7.09558  | -7068 | 7.34E-05 | 645  | 0.333333 | 0.007406 | CTSG      |
| 11103.15 | 6.078089 | -7068 | 7.62E-05 | 1191 | 0.333333 | 0.016136 | STIP1     |
| 6188.899 | 10.26957 | -7068 | 7.33E-05 | 576  | 0.333333 | 0.006697 | MYOD1     |
| 5676.309 | 6.519815 | -7068 | 7.44E-05 | 837  | 0.333333 | 0.01196  | CRKL      |
| 7870.981 | 6.774992 | -7068 | 7.49E-05 | 919  | 0.333333 | 0.011985 | PPP1CA    |
| 7744.482 | 6.239825 | -7068 | 7.55E-05 | 1011 | 0.333333 | 0.01569  | CDC42BPA  |
| 6819.083 | 7.466609 | -7068 | 7.46E-05 | 807  | 0.333333 | 0.010962 | TIMM44    |
| 22947.98 | 7.017548 | -7068 | 7.88E-05 | 1584 | 0.333333 | 0.023436 | PAPPA     |
| 5902.743 | 9.251854 | -7068 | 7.36E-05 | 625  | 0.333333 | 0.008464 | APOD      |
| 10364.7  | 7.713686 | -7068 | 7.54E-05 | 971  | 0.333333 | 0.013691 | BBOX1     |
| 15746.43 | 7.764205 | -7068 | 7.67E-05 | 1213 | 0.333333 | 0.017381 | GRB14     |
| 5933.23  | 8.671261 | -7068 | 7.39E-05 | 682  | 0.333333 | 0.009085 | SGTA      |
| 2302.163 | 7.403851 | -7068 | 7.30E-05 | 489  | 0.333333 | 0.007352 | RIOK3     |
| 6453.886 | 6.399802 | -7068 | 7.50E-05 | 905  | 0.333333 | 0.013835 | HMGCR     |
| 36930.8  | 6.696533 | -7068 | 8.17E-05 | 2084 | 0.333333 | 0.030854 | NTRK2     |
| 3883.595 | 7.823091 | -7068 | 7.35E-05 | 598  | 0.333333 | 0.008127 | UCP2      |
| 8565.275 | 6.990407 | -7068 | 7.54E-05 | 980  | 0.333333 | 0.014499 | BAG2      |
| 10530.4  | 7.290663 | -7068 | 7.58E-05 | 1041 | 0.333333 | 0.015187 | DUSP5     |

|          |          |       |          |      |          |          |          |
|----------|----------|-------|----------|------|----------|----------|----------|
| 4711.814 | 7.393791 | -7068 | 7.39E-05 | 676  | 0.333333 | 0.009482 | ZPR1     |
| 8582.267 | 6.974437 | -7068 | 7.53E-05 | 947  | 0.333333 | 0.013109 | TIMP1    |
| 10704.32 | 6.745717 | -7068 | 7.63E-05 | 1122 | 0.333333 | 0.017334 | TMEM87A  |
| 5247.986 | 7.543797 | -7068 | 7.40E-05 | 714  | 0.333333 | 0.01039  | CSPG4    |
| 7559.844 | 7.862241 | -7068 | 7.49E-05 | 855  | 0.333333 | 0.011979 | GSTO1    |
| 2484.896 | 9.747878 | -7068 | 7.24E-05 | 386  | 0.333333 | 0.005222 | AHSA2    |
| 24450.49 | 6.478266 | -7068 | 7.97E-05 | 1752 | 0.333333 | 0.02676  | NT5E     |
| 7744.303 | 7.480378 | -7068 | 7.50E-05 | 879  | 0.333333 | 0.012968 | PAX2     |
| 7099.495 | 4.690414 | -7068 | 7.55E-05 | 1127 | 0.333333 | 0.015226 | TRA2B    |
| 15876.64 | 7.167342 | -7068 | 7.73E-05 | 1314 | 0.333333 | 0.019257 | PYGL     |
| 5940.686 | 6.937388 | -7068 | 7.45E-05 | 808  | 0.333333 | 0.011803 | SEC11A   |
| 4907.673 | 5.969847 | -7068 | 7.41E-05 | 783  | 0.333333 | 0.010153 | PON1     |
| 13001.07 | 6.7363   | -7068 | 7.69E-05 | 1238 | 0.333333 | 0.018782 | STK39    |
| 5093.664 | 5.45241  | -7068 | 7.43E-05 | 845  | 0.333333 | 0.010899 | POLR2G   |
| 7729.928 | 7.098545 | -7068 | 7.48E-05 | 875  | 0.333333 | 0.012235 | COL16A1  |
| 2836.023 | 6.035416 | -7068 | 7.36E-05 | 628  | 0.333333 | 0.010016 | RTCA     |
| 5810.541 | 7.53086  | -7068 | 7.45E-05 | 776  | 0.333333 | 0.012107 | NPY1R    |
| 4495.36  | 10.80185 | -7068 | 7.29E-05 | 480  | 0.333333 | 0.006159 | IL9      |
| 6098.52  | 7.758697 | -7068 | 7.44E-05 | 759  | 0.333333 | 0.010538 | CLN3     |
| 13444.57 | 5.199248 | -7068 | 7.71E-05 | 1459 | 0.333333 | 0.019548 | CAV1     |
| 4034.843 | 8.3809   | -7068 | 7.34E-05 | 576  | 0.333333 | 0.007917 | CLC      |
| 7273.597 | 6.252264 | -7068 | 7.53E-05 | 960  | 0.333333 | 0.014419 | NID2     |
| 3440.547 | 9.666242 | -7068 | 7.28E-05 | 463  | 0.333333 | 0.005832 | ROM1     |
| 2282.794 | 5.561749 | -7068 | 7.32E-05 | 579  | 0.333333 | 0.008773 | ABI1     |
| 8503.346 | 7.814533 | -7068 | 7.49E-05 | 864  | 0.333333 | 0.01169  | FXYD3    |
| 9463.546 | 7.354913 | -7068 | 7.56E-05 | 991  | 0.333333 | 0.015533 | CFDP1    |
| 8971.502 | 8.242676 | -7068 | 7.50E-05 | 869  | 0.333333 | 0.01173  | KRT19    |
| 3188.433 | 8.506732 | -7068 | 7.30E-05 | 504  | 0.333333 | 0.007063 | GGA3     |
| 9482.359 | 7.763728 | -7068 | 7.54E-05 | 948  | 0.333333 | 0.013801 | WFS1     |
| 5819.292 | 8.47728  | -7068 | 7.37E-05 | 666  | 0.333333 | 0.00905  | NDUFC1   |
| 6940.459 | 8.351887 | -7068 | 7.45E-05 | 768  | 0.333333 | 0.011035 | SLC1A5   |
| 3748.238 | 10.26731 | -7068 | 7.30E-05 | 477  | 0.333333 | 0.00614  | INPP5K   |
| 4204.138 | 6.798159 | -7068 | 7.36E-05 | 642  | 0.25     | 0.007905 | SERPINA4 |
| 4898.789 | 11.05233 | -7068 | 7.31E-05 | 514  | 0.333333 | 0.007    | IFNB1    |
| 5481.735 | 6.265491 | -7068 | 7.47E-05 | 837  | 0.333333 | 0.012934 | CASK     |
| 16969.65 | 7.661634 | -7068 | 7.72E-05 | 1282 | 0.333333 | 0.018743 | KIFC3    |
| 15933.71 | 6.713736 | -7068 | 7.73E-05 | 1376 | 0.333333 | 0.020254 | SOS1     |
| 23680.23 | 6.290101 | -7068 | 7.96E-05 | 1745 | 0.333333 | 0.026137 | TCF7L2   |
| 5214.842 | 8.144032 | -7068 | 7.38E-05 | 673  | 0.333333 | 0.009052 | MKNK2    |
| 9328.459 | 6.427662 | -7068 | 7.57E-05 | 1067 | 0.333333 | 0.0152   | MMP3     |
| 11526.75 | 7.740627 | -7068 | 7.60E-05 | 1064 | 0.333333 | 0.016385 | POU4F1   |

|          |          |       |          |      |          |          |          |
|----------|----------|-------|----------|------|----------|----------|----------|
| 2414.063 | 9.184046 | -7068 | 7.26E-05 | 403  | 0.333333 | 0.004831 | PIGQ     |
| 9166.693 | 7.708745 | -7068 | 7.53E-05 | 932  | 0.333333 | 0.013562 | INSM1    |
| 5205.324 | 7.672046 | -7068 | 7.36E-05 | 665  | 0.333333 | 0.007964 | TNNC1    |
| 7013.936 | 6.504981 | -7068 | 7.49E-05 | 925  | 0.333333 | 0.013312 | SMARCE1  |
| 12114.92 | 7.608036 | -7068 | 7.63E-05 | 1110 | 0.333333 | 0.016611 | TMSB10   |
| 5231.262 | 7.342197 | -7068 | 7.40E-05 | 725  | 0.333333 | 0.009847 | BATF     |
| 17894.37 | 5.465507 | -7068 | 7.81E-05 | 1622 | 0.333333 | 0.021965 | VRK1     |
| 7876.95  | 7.369742 | -7068 | 7.49E-05 | 872  | 0.333333 | 0.012027 | LAMB2    |
| 7711.491 | 6.775255 | -7068 | 7.53E-05 | 948  | 0.333333 | 0.014201 | SRI      |
| 7814.503 | 6.198112 | -7068 | 7.57E-05 | 1035 | 0.333333 | 0.015885 | PPP2R2A  |
| 2963.109 | 8.351398 | -7068 | 7.30E-05 | 499  | 0.333333 | 0.006786 | DEXI     |
| 11358.6  | 6.36593  | -7068 | 7.62E-05 | 1172 | 0.333333 | 0.016656 | INHBA    |
| 6988.316 | 6.903708 | -7068 | 7.48E-05 | 859  | 0.333333 | 0.013207 | SCAF11   |
| 8154.751 | 5.852487 | -7068 | 7.59E-05 | 1089 | 0.333333 | 0.016643 | ACTR2    |
| 4845.147 | 10.05203 | -7068 | 7.34E-05 | 559  | 0.333333 | 0.007182 | GALK1    |
| 5847.507 | 8.37748  | -7068 | 7.39E-05 | 693  | 0.333333 | 0.009519 | ZIC1     |
| 9893.959 | 6.405985 | -7068 | 7.62E-05 | 1121 | 0.333333 | 0.017475 | GLIPR1   |
| 3618.28  | 7.042328 | -7068 | 7.37E-05 | 643  | 0.333333 | 0.00993  | NFATC3   |
| 7721.78  | 7.582215 | -7068 | 7.46E-05 | 839  | 0.333333 | 0.011467 | CCR3     |
| 7887.555 | 7.201625 | -7068 | 7.51E-05 | 923  | 0.333333 | 0.013298 | PDK1     |
| 8045.207 | 7.847666 | -7068 | 7.50E-05 | 861  | 0.333333 | 0.012071 | AZGP1    |
| 7956.448 | 5.603743 | -7068 | 7.58E-05 | 1105 | 0.333333 | 0.016569 | RPS6KB1  |
| 6033.879 | 6.484475 | -7068 | 7.42E-05 | 799  | 0.333333 | 0.009666 | SERPIND1 |
| 6990.537 | 7.562931 | -7068 | 7.47E-05 | 836  | 0.333333 | 0.012231 | TFAP2A   |
| 10322.26 | 6.760567 | -7068 | 7.61E-05 | 1097 | 0.333333 | 0.016513 | PECAM1   |
| 3868.759 | 8.00526  | -7068 | 7.35E-05 | 595  | 0.333333 | 0.009026 | ZC3H14   |
| 10740.7  | 6.910771 | -7068 | 7.60E-05 | 1090 | 0.333333 | 0.015984 | SERPINB1 |
| 6114.866 | 8.027556 | -7068 | 7.43E-05 | 741  | 0.333333 | 0.010473 | ATP2A3   |
| 9831.717 | 7.584356 | -7068 | 7.57E-05 | 997  | 0.333333 | 0.015185 | CXCR5    |
| 12060.14 | 6.428683 | -7068 | 7.67E-05 | 1224 | 0.333333 | 0.017995 | ABAT     |
| 16075.21 | 7.518194 | -7068 | 7.71E-05 | 1271 | 0.333333 | 0.018995 | MSX1     |
| 14918.43 | 7.596622 | -7068 | 7.66E-05 | 1217 | 0.333333 | 0.017773 | CBS      |
| 5664.377 | 5.89608  | -7068 | 7.43E-05 | 846  | 0.333333 | 0.011069 | EXOSC9   |
| 8453.615 | 7.784311 | -7068 | 7.52E-05 | 907  | 0.333333 | 0.013949 | CNR1     |
| 2702.359 | 9.509438 | -7068 | 7.27E-05 | 424  | 0.333333 | 0.005442 | WNT6     |
| 8514.828 | 6.420852 | -7068 | 7.57E-05 | 1039 | 0.333333 | 0.015866 | EFNB2    |
| 8038.42  | 6.911512 | -7068 | 7.54E-05 | 958  | 0.333333 | 0.014803 | PRDM2    |
| 2851.119 | 5.424352 | -7068 | 7.36E-05 | 664  | 0.333333 | 0.009886 | TPR      |
| 4552.18  | 10.29389 | -7068 | 7.32E-05 | 512  | 0.25     | 0.006233 | OCEL1    |
| 5622.856 | 5.941729 | -7068 | 7.42E-05 | 830  | 0.333333 | 0.010026 | ITIH3    |
| 7554.268 | 9.276371 | -7068 | 7.43E-05 | 730  | 0.333333 | 0.010338 | SP4      |

|          |          |       |          |      |          |          |          |
|----------|----------|-------|----------|------|----------|----------|----------|
| 17578.82 | 7.587445 | -7068 | 7.73E-05 | 1294 | 0.333333 | 0.019379 | DZIP1    |
| 9121.378 | 6.602911 | -7068 | 7.58E-05 | 1049 | 0.333333 | 0.015328 | FBN2     |
| 5333.788 | 7.530509 | -7068 | 7.43E-05 | 735  | 0.333333 | 0.0109   | PLA2G5   |
| 10015.9  | 7.041449 | -7068 | 7.60E-05 | 1051 | 0.333333 | 0.015962 | PGRMC2   |
| 11961.13 | 6.459463 | -7068 | 7.68E-05 | 1233 | 0.333333 | 0.019278 | ADAM9    |
| 3164.588 | 7.108262 | -7068 | 7.33E-05 | 577  | 0.333333 | 0.008382 | PMPCB    |
| 6175.56  | 8.469343 | -7068 | 7.41E-05 | 709  | 0.333333 | 0.009263 | GCHFR    |
| 7984.281 | 7.442468 | -7068 | 7.51E-05 | 919  | 0.333333 | 0.013477 | ABL2     |
| 9595.738 | 6.64965  | -7068 | 7.53E-05 | 1026 | 0.333333 | 0.013148 | NFKBIA   |
| 3137.445 | 6.421622 | -7068 | 7.36E-05 | 629  | 0.333333 | 0.009405 | EIF2A    |
| 5456.07  | 7.565046 | -7068 | 7.41E-05 | 721  | 0.333333 | 0.010016 | IL18     |
| 7637.404 | 6.91625  | -7068 | 7.50E-05 | 919  | 0.333333 | 0.012676 | MYBL2    |
| 3846.165 | 7.976583 | -7068 | 7.36E-05 | 599  | 0.333333 | 0.009066 | RASGRF1  |
| 716.0178 | 9.15342  | -7068 | 7.14E-05 | 215  | 0.333333 | 0.00261  | MUC5AC   |
| 3949.374 | 10.13871 | -7068 | 7.30E-05 | 470  | 0.333333 | 0.005877 | UPK2     |
| 17173.15 | 7.053397 | -7068 | 7.75E-05 | 1371 | 0.333333 | 0.021151 | IVNS1ABP |
| 10662.58 | 6.230028 | -7068 | 7.65E-05 | 1189 | 0.333333 | 0.018657 | PTPRG    |
| 13657.38 | 6.728656 | -7068 | 7.67E-05 | 1239 | 0.333333 | 0.018    | GNAO1    |
| 4651.799 | 8.679014 | -7068 | 7.35E-05 | 599  | 0.333333 | 0.007957 | VEGFB    |
| 5507.362 | 7.893854 | -7068 | 7.40E-05 | 717  | 0.333333 | 0.009833 | HDAC6    |
| 22656.13 | 6.69912  | -7068 | 7.87E-05 | 1617 | 0.333333 | 0.023232 | FGFR2    |
| 9844.175 | 6.372522 | -7068 | 7.59E-05 | 1104 | 0.333333 | 0.016176 | CAPN2    |
| 6003.634 | 6.869185 | -7068 | 7.44E-05 | 804  | 0.333333 | 0.010432 | LBP      |
| 16295.35 | 6.524813 | -7068 | 7.79E-05 | 1427 | 0.333333 | 0.022229 | PIP4K2A  |
| 5516.374 | 7.309717 | -7068 | 7.42E-05 | 763  | 0.333333 | 0.010864 | SMARCB1  |
| 17908.82 | 6.980299 | -7068 | 7.78E-05 | 1404 | 0.333333 | 0.021054 | MYRIP    |
| 6288.922 | 6.725985 | -7068 | 7.46E-05 | 853  | 0.333333 | 0.011535 | P4HB     |
| 4856.524 | 8.238242 | -7068 | 7.39E-05 | 646  | 0.333333 | 0.009384 | WNT11    |
| 6456.175 | 6.955667 | -7068 | 7.48E-05 | 853  | 0.333333 | 0.013123 | ROCK2    |
| 5640.848 | 6.303184 | -7068 | 7.46E-05 | 848  | 0.333333 | 0.012042 | TIE1     |
| 6879.856 | 6.686478 | -7068 | 7.51E-05 | 909  | 0.333333 | 0.01387  | LCOR     |
| 9233.481 | 7.783071 | -7068 | 7.53E-05 | 940  | 0.333333 | 0.013716 | PEX5     |
| 6222.58  | 7.942631 | -7068 | 7.44E-05 | 755  | 0.333333 | 0.011111 | PPP1R10  |
| 7020.806 | 7.720013 | -7068 | 7.44E-05 | 805  | 0.333333 | 0.011259 | ID1      |
| 7907.236 | 5.422846 | -7068 | 7.55E-05 | 1115 | 0.333333 | 0.01578  | PTPN11   |
| 3908.139 | 6.273289 | -7068 | 7.36E-05 | 695  | 0.333333 | 0.008951 | DAXX     |
| 11625.71 | 6.345585 | -7068 | 7.63E-05 | 1179 | 0.25     | 0.016359 | TNFSF10  |
| 11853.35 | 6.413395 | -7068 | 7.66E-05 | 1223 | 0.333333 | 0.017592 | CD40     |
| 3358.156 | 12.10327 | -7068 | 7.24E-05 | 368  | 0.333333 | 0.004065 | AGRP     |
| 7063.449 | 6.79455  | -7068 | 7.42E-05 | 831  | 0.333333 | 0.009406 | KLKB1    |
| 9715.776 | 6.013889 | -7068 | 7.60E-05 | 1143 | 0.333333 | 0.016102 | CTSB     |

|          |          |       |          |      |          |          |         |
|----------|----------|-------|----------|------|----------|----------|---------|
| 5720.087 | 6.77099  | -7068 | 7.47E-05 | 826  | 0.333333 | 0.012548 | ATF6    |
| 6077.451 | 5.847868 | -7068 | 7.49E-05 | 910  | 0.333333 | 0.012615 | VDAC2   |
| 10679.76 | 6.941558 | -7068 | 7.62E-05 | 1098 | 0.333333 | 0.017088 | DCT     |
| 9393.918 | 7.033873 | -7068 | 7.57E-05 | 1023 | 0.333333 | 0.014975 | PDLIM1  |
| 9355.844 | 6.217443 | -7068 | 7.57E-05 | 1091 | 0.333333 | 0.01517  | RFC2    |
| 5343.376 | 7.829855 | -7068 | 7.40E-05 | 701  | 0.333333 | 0.010213 | RAB9A   |
| 5984.076 | 9.989431 | -7068 | 7.36E-05 | 616  | 0.333333 | 0.008381 | PTGDS   |
| 5482.892 | 8.402507 | -7068 | 7.39E-05 | 666  | 0.333333 | 0.009368 | RBCK1   |
| 4103.796 | 8.009532 | -7068 | 7.35E-05 | 585  | 0.333333 | 0.007537 | PRKCSH  |
| 4106.507 | 8.175978 | -7068 | 7.37E-05 | 610  | 0.333333 | 0.00926  | FZD6    |
| 11792.86 | 6.7715   | -7068 | 7.64E-05 | 1169 | 0.333333 | 0.017705 | POSTN   |
| 9098.058 | 7.018697 | -7068 | 7.56E-05 | 1012 | 0.333333 | 0.015517 | UST     |
| 7171.987 | 8.643866 | -7068 | 7.42E-05 | 740  | 0.333333 | 0.010138 | MXD1    |
| 4010.995 | 7.27677  | -7068 | 7.37E-05 | 641  | 0.333333 | 0.009799 | ATMIN   |
| 5305.365 | 6.583238 | -7068 | 7.42E-05 | 761  | 0.333333 | 0.010139 | TAP1    |
| 3171.018 | 7.381495 | -7068 | 7.31E-05 | 545  | 0.333333 | 0.006731 | STX1A   |
| 7617.091 | 7.0829   | -7068 | 7.48E-05 | 891  | 0.333333 | 0.012174 | AGT     |
| 5582.673 | 6.243494 | -7068 | 7.43E-05 | 805  | 0.333333 | 0.010692 | COX7B   |
| 3844.123 | 8.33854  | -7068 | 7.33E-05 | 562  | 0.333333 | 0.007757 | ADORA1  |
| 8379.087 | 7.852822 | -7068 | 7.49E-05 | 876  | 0.333333 | 0.01265  | IBSP    |
| 8137.706 | 6.541449 | -7068 | 7.54E-05 | 984  | 0.333333 | 0.014007 | LGALS1  |
| 9645.476 | 6.250445 | -7068 | 7.56E-05 | 1094 | 0.333333 | 0.015123 | BCL2    |
| 9896.198 | 6.23386  | -7068 | 7.62E-05 | 1142 | 0.333333 | 0.01684  | MAP3K8  |
| 6366.667 | 8.090351 | -7068 | 7.39E-05 | 713  | 0.333333 | 0.008783 | CXCR3   |
| 14566.88 | 6.495074 | -7068 | 7.74E-05 | 1346 | 0.333333 | 0.020277 | BMP2K   |
| 17133.82 | 6.833465 | -7068 | 7.81E-05 | 1434 | 0.333333 | 0.022332 | CLTA    |
| 7263.307 | 6.80477  | -7068 | 7.51E-05 | 916  | 0.333333 | 0.013107 | PCCB    |
| 3382.816 | 6.806497 | -7068 | 7.33E-05 | 580  | 0.333333 | 0.007443 | MRPL40  |
| 6898.737 | 7.518632 | -7068 | 7.47E-05 | 816  | 0.333333 | 0.011393 | PLXNB2  |
| 13661.47 | 7.152859 | -7068 | 7.69E-05 | 1200 | 0.333333 | 0.01872  | PDZD2   |
| 6192.571 | 7.866201 | -7068 | 7.45E-05 | 763  | 0.333333 | 0.011942 | BEX4    |
| 4395.336 | 7.329703 | -7068 | 7.38E-05 | 670  | 0.333333 | 0.009285 | F8      |
| 4507.158 | 8.944142 | -7068 | 7.36E-05 | 592  | 0.333333 | 0.008417 | FCHO1   |
| 5326.591 | 8.458245 | -7068 | 7.40E-05 | 670  | 0.333333 | 0.009237 | TIMM17B |
| 9764.292 | 7.871975 | -7068 | 7.53E-05 | 934  | 0.333333 | 0.013152 | MEP1A   |
| 6737.092 | 5.967649 | -7068 | 7.54E-05 | 968  | 0.333333 | 0.014825 | CYP1B1  |
| 9017.291 | 7.505934 | -7068 | 7.55E-05 | 956  | 0.333333 | 0.014234 | MBOAT7  |
| 3264.031 | 8.342663 | -7068 | 7.31E-05 | 514  | 0.333333 | 0.00678  | IL3     |
| 14987.55 | 7.002773 | -7068 | 7.72E-05 | 1290 | 0.333333 | 0.019672 | EPB41L3 |
| 4999.02  | 8.710452 | -7068 | 7.37E-05 | 630  | 0.333333 | 0.008961 | ABCD2   |
| 11999.13 | 7.083555 | -7068 | 7.65E-05 | 1153 | 0.333333 | 0.017852 | BCAR3   |

|          |          |       |          |      |          |          |          |
|----------|----------|-------|----------|------|----------|----------|----------|
| 7768.259 | 6.125034 | -7068 | 7.56E-05 | 1029 | 0.333333 | 0.015863 | DNM1L    |
| 3644.765 | 8.209553 | -7068 | 7.33E-05 | 557  | 0.333333 | 0.007799 | LY9      |
| 20666.77 | 6.700362 | -7068 | 7.86E-05 | 1562 | 0.333333 | 0.023066 | PROX1    |
| 6201.806 | 5.706084 | -7068 | 7.43E-05 | 880  | 0.333333 | 0.010568 | KNG1     |
| 3438.362 | 6.368673 | -7068 | 7.36E-05 | 636  | 0.333333 | 0.008643 | SDHC     |
| 7399.398 | 6.062537 | -7068 | 7.54E-05 | 1005 | 0.333333 | 0.014968 | PSME4    |
| 6225.496 | 8.257679 | -7068 | 7.40E-05 | 707  | 0.333333 | 0.009845 | BCAS1    |
| 8045.691 | 6.14024  | -7068 | 7.56E-05 | 1030 | 0.333333 | 0.015519 | EDNRA    |
| 12311.6  | 7.373034 | -7068 | 7.63E-05 | 1131 | 0.333333 | 0.016118 | SDC1     |
| 6590.875 | 8.696492 | -7068 | 7.42E-05 | 721  | 0.333333 | 0.009883 | IL24     |
| 5238.483 | 7.963991 | -7068 | 7.38E-05 | 675  | 0.333333 | 0.008977 | LIF      |
| 7324.933 | 7.052507 | -7068 | 7.49E-05 | 891  | 0.333333 | 0.012976 | HERPUD1  |
| 5407.446 | 7.318718 | -7068 | 7.42E-05 | 741  | 0.333333 | 0.01041  | FUCA1    |
| 3751.049 | 7.063609 | -7068 | 7.32E-05 | 607  | 0.333333 | 0.007602 | LRP2     |
| 5264.752 | 5.71226  | -7068 | 7.45E-05 | 839  | 0.333333 | 0.011543 | GBP1     |
| 3944.412 | 6.991971 | -7068 | 7.35E-05 | 628  | 0.333333 | 0.007768 | PKLR     |
| 4616.341 | 6.277632 | -7068 | 7.45E-05 | 791  | 0.333333 | 0.012688 | WTAP     |
| 8011.049 | 9.098097 | -7068 | 7.44E-05 | 781  | 0.333333 | 0.010982 | CDKN2C   |
| 6694.793 | 6.463614 | -7068 | 7.50E-05 | 916  | 0.333333 | 0.014188 | AKT3     |
| 13379.17 | 6.803926 | -7068 | 7.67E-05 | 1237 | 0.333333 | 0.017831 | ACVRL1   |
| 8274.334 | 7.102096 | -7068 | 7.54E-05 | 957  | 0.333333 | 0.014275 | LGMN     |
| 18855.66 | 6.830536 | -7068 | 7.82E-05 | 1476 | 0.333333 | 0.022219 | KANK1    |
| 8590.045 | 9.238275 | -7068 | 7.45E-05 | 793  | 0.333333 | 0.010944 | SCGB1A1  |
| 12455.72 | 6.337166 | -7068 | 7.69E-05 | 1258 | 0.333333 | 0.019124 | SYNE2    |
| 4993.613 | 6.528803 | -7068 | 7.42E-05 | 737  | 0.333333 | 0.00988  | STOML2   |
| 6240.46  | 7.705577 | -7068 | 7.43E-05 | 778  | 0.333333 | 0.011167 | IL1A     |
| 16026.47 | 7.02005  | -7068 | 7.74E-05 | 1334 | 0.333333 | 0.020159 | LMO7     |
| 3544.29  | 9.629263 | -7068 | 7.29E-05 | 482  | 0.333333 | 0.006591 | DLX5     |
| 13181.92 | 6.548861 | -7068 | 7.69E-05 | 1260 | 0.333333 | 0.018819 | PLSCR1   |
| 7897.44  | 7.506164 | -7068 | 7.51E-05 | 897  | 0.333333 | 0.013723 | PMAIP1   |
| 9753.506 | 6.502968 | -7068 | 7.61E-05 | 1129 | 0.333333 | 0.017051 | PPP2R1B  |
| 5217.242 | 6.446236 | -7068 | 7.42E-05 | 794  | 0.333333 | 0.010753 | FADD     |
| 2749.379 | 7.623435 | -7068 | 7.31E-05 | 510  | 0.333333 | 0.007448 | APPBP2   |
| 9953.407 | 6.281559 | -7068 | 7.60E-05 | 1133 | 0.333333 | 0.01628  | REL      |
| 4208.143 | 6.995146 | -7068 | 7.39E-05 | 677  | 0.333333 | 0.009884 | MAP1LC3B |
| 3890.859 | 9.284616 | -7068 | 7.31E-05 | 518  | 0.333333 | 0.007152 | CLUL1    |
| 10002.48 | 6.49731  | -7068 | 7.63E-05 | 1122 | 0.333333 | 0.017727 | CDYL     |
| 5629.547 | 6.298679 | -7068 | 7.41E-05 | 787  | 0.333333 | 0.009489 | CCR5     |
| 8927.857 | 6.441096 | -7068 | 7.54E-05 | 1032 | 0.333333 | 0.01406  | EGR1     |
| 4503.946 | 8.789108 | -7068 | 7.35E-05 | 599  | 0.333333 | 0.008356 | PIAS3    |
| 3438.782 | 7.176007 | -7068 | 7.35E-05 | 604  | 0.333333 | 0.009003 | ENTPD3   |

|          |          |       |          |      |          |          |          |
|----------|----------|-------|----------|------|----------|----------|----------|
| 3721.598 | 7.561209 | -7068 | 7.36E-05 | 606  | 0.333333 | 0.008866 | DISC1    |
| 16469.44 | 6.636848 | -7068 | 7.71E-05 | 1377 | 0.333333 | 0.019215 | TTK      |
| 5720.764 | 6.894082 | -7068 | 7.44E-05 | 786  | 0.333333 | 0.011222 | NPR3     |
| 5195.894 | 6.662035 | -7068 | 7.45E-05 | 792  | 0.333333 | 0.011975 | LYST     |
| 12738.62 | 6.839731 | -7068 | 7.70E-05 | 1227 | 0.333333 | 0.019264 | OSBPL3   |
| 7536.136 | 6.710899 | -7068 | 7.53E-05 | 960  | 0.333333 | 0.014889 | VAPA     |
| 5396.877 | 7.096173 | -7068 | 7.45E-05 | 772  | 0.333333 | 0.011911 | BAMBI    |
| 7360.692 | 5.803169 | -7068 | 7.54E-05 | 1026 | 0.333333 | 0.014683 | SFPQ     |
| 8841.842 | 7.786586 | -7068 | 7.51E-05 | 910  | 0.333333 | 0.012842 | EPHA1    |
| 7877.266 | 5.169617 | -7068 | 7.55E-05 | 1102 | 0.333333 | 0.014433 | AURKB    |
| 6122.261 | 8.771649 | -7068 | 7.40E-05 | 686  | 0.25     | 0.009727 | CALB1    |
| 5957.404 | 6.91096  | -7068 | 7.48E-05 | 829  | 0.333333 | 0.013316 | GAPVD1   |
| 4323.345 | 6.865781 | -7068 | 7.40E-05 | 717  | 0.333333 | 0.010612 | PRKAR2A  |
| 5740.382 | 6.616618 | -7068 | 7.48E-05 | 840  | 0.333333 | 0.012841 | AGPS     |
| 3998.883 | 7.702012 | -7068 | 7.36E-05 | 630  | 0.333333 | 0.008783 | ELK1     |
| 3225.607 | 7.327575 | -7068 | 7.34E-05 | 570  | 0.333333 | 0.008332 | EXOC3    |
| 16531.99 | 6.818977 | -7068 | 7.75E-05 | 1368 | 0.333333 | 0.02011  | PDE5A    |
| 14695.36 | 7.423131 | -7068 | 7.64E-05 | 1221 | 0.333333 | 0.017181 | NDUFS1   |
| 11718.63 | 10.03789 | -7068 | 7.50E-05 | 859  | 0.333333 | 0.012174 | CRABP2   |
| 7718.794 | 7.500128 | -7068 | 7.50E-05 | 884  | 0.333333 | 0.013379 | APAF1    |
| 8884.391 | 6.571281 | -7068 | 7.53E-05 | 1027 | 0.333333 | 0.013641 | RARA     |
| 7156.975 | 9.01473  | -7068 | 7.43E-05 | 722  | 0.333333 | 0.009802 | SCN5A    |
| 16745.41 | 6.379275 | -7068 | 7.74E-05 | 1408 | 0.333333 | 0.018834 | SERPING1 |
| 7041.791 | 6.770959 | -7068 | 7.50E-05 | 912  | 0.333333 | 0.013853 | CREM     |
| 15678.61 | 6.312299 | -7068 | 7.77E-05 | 1418 | 0.333333 | 0.021267 | NEDD4L   |
| 8417.207 | 7.362965 | -7068 | 7.54E-05 | 942  | 0.333333 | 0.013699 | TPMT     |
| 9269.296 | 6.500199 | -7068 | 7.60E-05 | 1079 | 0.333333 | 0.016705 | EPB41L2  |
| 4559.432 | 8.971764 | -7068 | 7.36E-05 | 595  | 0.333333 | 0.008566 | INTS3    |
| 6090.739 | 6.360441 | -7068 | 7.49E-05 | 872  | 0.333333 | 0.012397 | PRDX1    |
| 12990.67 | 5.913265 | -7068 | 7.73E-05 | 1361 | 0.333333 | 0.020947 | SC5D     |
| 6669.648 | 5.100647 | -7068 | 7.50E-05 | 999  | 0.333333 | 0.012967 | ITGB3BP  |
| 5153.679 | 6.539819 | -7068 | 7.43E-05 | 787  | 0.333333 | 0.01136  | STK17A   |
| 2849.06  | 8.390701 | -7068 | 7.28E-05 | 474  | 0.333333 | 0.006826 | ZNF148   |
| 6575.002 | 9.146518 | -7068 | 7.41E-05 | 676  | 0.333333 | 0.008933 | P2RX6    |
| 6555.171 | 5.736073 | -7068 | 7.47E-05 | 936  | 0.25     | 0.012574 | CFH      |
| 5509.552 | 9.184758 | -7068 | 7.35E-05 | 592  | 0.333333 | 0.006846 | SLURP1   |
| 10599.05 | 6.839269 | -7068 | 7.57E-05 | 1068 | 0.333333 | 0.014184 | C6       |
| 1801.466 | 6.596279 | -7068 | 7.28E-05 | 469  | 0.333333 | 0.007313 | RNMT     |
| 4688.6   | 6.144767 | -7068 | 7.40E-05 | 760  | 0.333333 | 0.009908 | CD247    |
| 7667.504 | 7.845283 | -7068 | 7.48E-05 | 853  | 0.333333 | 0.012072 | MDK      |
| 6518.627 | 8.562383 | -7068 | 7.41E-05 | 722  | 0.333333 | 0.010547 | NDUFA5   |

|          |          |       |          |      |          |          |          |
|----------|----------|-------|----------|------|----------|----------|----------|
| 5983.217 | 6.291123 | -7068 | 7.51E-05 | 893  | 0.333333 | 0.014424 | TMED5    |
| 7952.878 | 8.995892 | -7068 | 7.44E-05 | 763  | 0.333333 | 0.010897 | CADM3    |
| 6511.894 | 7.948972 | -7068 | 7.44E-05 | 771  | 0.333333 | 0.01105  | FCER1A   |
| 3622.183 | 7.442166 | -7068 | 7.35E-05 | 577  | 0.333333 | 0.007748 | WDR18    |
| 6306.593 | 8.540942 | -7068 | 7.43E-05 | 721  | 0.333333 | 0.009681 | POR      |
| 6168.856 | 6.190696 | -7068 | 7.51E-05 | 915  | 0.333333 | 0.014158 | RRP1B    |
| 11863.19 | 6.28159  | -7068 | 7.67E-05 | 1246 | 0.333333 | 0.018331 | CTSC     |
| 5379.039 | 6.35514  | -7068 | 7.41E-05 | 783  | 0.333333 | 0.010177 | HLA-G    |
| 5347.154 | 6.918612 | -7068 | 7.44E-05 | 784  | 0.333333 | 0.011651 | HIRA     |
| 4401.226 | 7.253254 | -7068 | 7.40E-05 | 692  | 0.333333 | 0.010412 | ARHGAP35 |
| 9485.046 | 7.691601 | -7068 | 7.53E-05 | 930  | 0.333333 | 0.013776 | TUBGCP4  |
| 3139.445 | 5.834163 | -7068 | 7.36E-05 | 637  | 0.333333 | 0.008558 | FARSA    |
| 5154.505 | 8.793665 | -7068 | 7.36E-05 | 613  | 0.333333 | 0.008127 | PIP      |
| 7743.112 | 6.781962 | -7068 | 7.55E-05 | 958  | 0.333333 | 0.015112 | OPA1     |
| 8719.608 | 7.111969 | -7068 | 7.53E-05 | 964  | 0.333333 | 0.013793 | ABCB4    |
| 4649.155 | 9.701364 | -7068 | 7.33E-05 | 553  | 0.333333 | 0.007276 | OVGP1    |
| 11225.57 | 6.744254 | -7068 | 7.66E-05 | 1165 | 0.333333 | 0.018137 | MPRIP    |
| 12814.76 | 5.740179 | -7068 | 7.72E-05 | 1364 | 0.333333 | 0.020046 | CALD1    |
| 3376.437 | 8.69513  | -7068 | 7.31E-05 | 497  | 0.333333 | 0.006501 | GHRH     |
| 3674.891 | 10.07007 | -7068 | 7.30E-05 | 473  | 0.333333 | 0.005905 | SLC6A3   |
| 5230.172 | 7.986727 | -7068 | 7.40E-05 | 694  | 0.333333 | 0.010016 | EFNB1    |
| 6536.686 | 7.34422  | -7068 | 7.47E-05 | 830  | 0.333333 | 0.012127 | BAG1     |
| 3609.674 | 11.93399 | -7068 | 7.24E-05 | 391  | 0.333333 | 0.004913 | KCNV2    |
| 2562.47  | 4.524671 | -7068 | 7.35E-05 | 674  | 0.333333 | 0.009359 | SRSF10   |
| 9007.788 | 4.013698 | -7068 | 7.62E-05 | 1355 | 0.333333 | 0.016331 | CCNB1    |
| 4882.291 | 7.94126  | -7068 | 7.39E-05 | 677  | 0.333333 | 0.009431 | GPC1     |
| 11177.15 | 6.261611 | -7068 | 7.68E-05 | 1219 | 0.333333 | 0.01887  | TSN      |
| 6379.868 | 10.72045 | -7068 | 7.36E-05 | 595  | 0.333333 | 0.008293 | SGSM3    |
| 3490.37  | 6.591183 | -7068 | 7.35E-05 | 647  | 0.333333 | 0.008664 | STAT6    |
| 4021.339 | 9.316803 | -7068 | 7.31E-05 | 526  | 0.333333 | 0.006962 | TSPAN1   |
| 9789.056 | 6.524052 | -7068 | 7.60E-05 | 1102 | 0.333333 | 0.016691 | USP10    |
| 6921.717 | 8.628693 | -7068 | 7.41E-05 | 725  | 0.333333 | 0.010005 | ZIC3     |
| 11411.58 | 6.48246  | -7068 | 7.66E-05 | 1194 | 0.333333 | 0.018448 | ACSL4    |
| 3635.347 | 7.456216 | -7068 | 7.36E-05 | 586  | 0.333333 | 0.008615 | YARS2    |
| 4793.152 | 10.66198 | -7068 | 7.31E-05 | 498  | 0.333333 | 0.007047 | RPGRIP1  |
| 5378.509 | 8.015763 | -7068 | 7.41E-05 | 708  | 0.333333 | 0.010605 | MFN2     |
| 7014.858 | 7.90016  | -7068 | 7.45E-05 | 791  | 0.333333 | 0.011339 | RXRG     |
| 4729.9   | 9.213608 | -7068 | 7.35E-05 | 596  | 0.333333 | 0.008149 | KYAT1    |
| 13150.55 | 7.901838 | -7068 | 7.65E-05 | 1122 | 0.333333 | 0.016232 | TALDO1   |
| 3208.398 | 7.733096 | -7068 | 7.33E-05 | 560  | 0.333333 | 0.008505 | PIP4K2B  |
| 4630.366 | 8.990435 | -7068 | 7.35E-05 | 585  | 0.333333 | 0.008314 | DEFA6    |



|          |          |       |          |      |          |          |         |
|----------|----------|-------|----------|------|----------|----------|---------|
| 11176.8  | 7.305096 | -7068 | 7.59E-05 | 1062 | 0.333333 | 0.01544  | HNFB    |
| 15902.12 | 6.809059 | -7068 | 7.75E-05 | 1346 | 0.333333 | 0.02074  | RNF144A |
| 4890.419 | 9.951629 | -7068 | 7.34E-05 | 551  | 0.333333 | 0.007233 | PTMS    |
| 6541.573 | 6.919081 | -7068 | 7.49E-05 | 876  | 0.333333 | 0.013509 | GLO1    |
| 5375.609 | 9.670539 | -7068 | 7.35E-05 | 581  | 0.333333 | 0.007282 | MYLPF   |
| 7679.029 | 7.029577 | -7068 | 7.52E-05 | 935  | 0.333333 | 0.014062 | PIR     |
| 9938.648 | 6.535122 | -7068 | 7.61E-05 | 1111 | 0.333333 | 0.016653 | SGK1    |
| 7371.733 | 6.81254  | -7068 | 7.51E-05 | 923  | 0.333333 | 0.013356 | CTSL    |
| 9741.47  | 6.805072 | -7068 | 7.59E-05 | 1070 | 0.333333 | 0.015854 | CLU     |
| 10011.56 | 7.143094 | -7068 | 7.56E-05 | 1020 | 0.333333 | 0.013877 | FAH     |
| 8295.737 | 5.83309  | -7068 | 7.57E-05 | 1079 | 0.333333 | 0.015458 | ATP5G3  |
| 6309.015 | 6.030355 | -7068 | 7.48E-05 | 896  | 0.333333 | 0.012369 | PRELP   |
| 6679.66  | 6.13059  | -7068 | 7.48E-05 | 910  | 0.333333 | 0.012699 | AOC3    |
| 4520.152 | 8.487386 | -7068 | 7.36E-05 | 614  | 0.333333 | 0.00863  | FADS3   |
| 4972.724 | 10.24716 | -7068 | 7.33E-05 | 555  | 0.333333 | 0.007024 | LTB4R   |
| 4143.782 | 8.666449 | -7068 | 7.33E-05 | 567  | 0.333333 | 0.008041 | ULK1    |
| 7754.222 | 6.300065 | -7068 | 7.51E-05 | 991  | 0.333333 | 0.013345 | UBE2I   |
| 2837.507 | 7.70558  | -7068 | 7.31E-05 | 521  | 0.333333 | 0.007689 | IFIT5   |
| 5243.498 | 7.008351 | -7068 | 7.44E-05 | 757  | 0.333333 | 0.011739 | FBXL5   |
| 4739.041 | 6.720768 | -7068 | 7.42E-05 | 730  | 0.333333 | 0.010481 | TIMP2   |
| 9722.271 | 7.097788 | -7068 | 7.56E-05 | 1024 | 0.333333 | 0.015377 | CAP2    |
| 10836.29 | 6.138195 | -7068 | 7.59E-05 | 1154 | 0.333333 | 0.015231 | APOH    |
| 1814.295 | 7.191242 | -7068 | 7.26E-05 | 431  | 0.333333 | 0.006163 | ATG13   |
| 4083.355 | 7.622292 | -7068 | 7.37E-05 | 619  | 0.333333 | 0.008284 | PFKL    |
| 2786.119 | 6.775976 | -7068 | 7.30E-05 | 552  | 0.333333 | 0.007872 | RAD50   |
| 11487.98 | 6.264611 | -7068 | 7.66E-05 | 1230 | 0.333333 | 0.018213 | TFDP1   |
| 5821.623 | 6.263685 | -7068 | 7.48E-05 | 881  | 0.333333 | 0.013286 | EIF5    |
| 10911.31 | 7.167106 | -7068 | 7.58E-05 | 1069 | 0.333333 | 0.01503  | TRIM27  |
| 10177.78 | 6.609589 | -7068 | 7.61E-05 | 1109 | 0.333333 | 0.016962 | LIFR    |
| 6749.01  | 7.74062  | -7068 | 7.44E-05 | 802  | 0.333333 | 0.011564 | PPARD   |
| 7443.649 | 5.180883 | -7068 | 7.52E-05 | 1058 | 0.333333 | 0.013561 | MMP2    |
| 36210.73 | 20.05036 | -7068 | 7.53E-05 | 905  | 0.333333 | 0.01362  | PIWIL1  |
| 3324.042 | 8.244256 | -7068 | 7.32E-05 | 535  | 0.333333 | 0.007433 | ALOX15  |
| 17325.46 | 11.82626 | -7068 | 7.50E-05 | 865  | 0.333333 | 0.012386 | MPC2    |
| 14055.62 | 7.125743 | -7068 | 7.69E-05 | 1235 | 0.333333 | 0.018686 | DCBLD2  |
| 3155.524 | 9.240444 | -7068 | 7.30E-05 | 477  | 0.333333 | 0.006379 | CAMP    |
| 20654.87 | 6.011194 | -7068 | 7.89E-05 | 1669 | 0.333333 | 0.023982 | JAG1    |
| 9971.871 | 6.782996 | -7068 | 7.59E-05 | 1066 | 0.333333 | 0.016049 | PCSK5   |
| 9633.858 | 6.589158 | -7068 | 7.61E-05 | 1099 | 0.333333 | 0.017088 | CD47    |
| 4134.165 | 9.413728 | -7068 | 7.31E-05 | 518  | 0.333333 | 0.006538 | NRTN    |
| 3084.565 | 7.825924 | -7068 | 7.30E-05 | 510  | 0.333333 | 0.00629  | MYBPC2  |

|          |          |       |          |      |          |          |          |
|----------|----------|-------|----------|------|----------|----------|----------|
| 7525.316 | 7.026295 | -7068 | 7.50E-05 | 899  | 0.333333 | 0.012657 | ALDH2    |
| 13236.31 | 6.771113 | -7068 | 7.71E-05 | 1263 | 0.333333 | 0.019763 | MMD      |
| 13102.99 | 6.715901 | -7068 | 7.70E-05 | 1252 | 0.333333 | 0.019095 | TNFRSF21 |
| 2982.432 | 10.30367 | -7068 | 7.25E-05 | 391  | 0.333333 | 0.00468  | PDE6H    |
| 9289.646 | 6.260113 | -7068 | 7.61E-05 | 1107 | 0.333333 | 0.016708 | GCLC     |
| 5196.777 | 7.812063 | -7068 | 7.38E-05 | 682  | 0.333333 | 0.009244 | PAX8     |
| 7467.804 | 6.649109 | -7068 | 7.51E-05 | 934  | 0.333333 | 0.013643 | MTHFD2   |
| 4233.544 | 9.905651 | -7068 | 7.30E-05 | 498  | 0.333333 | 0.006587 | FABP7    |
| 6092.398 | 5.949449 | -7068 | 7.47E-05 | 899  | 0.333333 | 0.012908 | VDAC3    |
| 5287.693 | 7.470941 | -7068 | 7.43E-05 | 739  | 0.333333 | 0.011106 | SRD5A1   |
| 6971.742 | 8.007064 | -7068 | 7.46E-05 | 810  | 0.333333 | 0.011722 | PC       |
| 7231.481 | 6.670069 | -7068 | 7.51E-05 | 929  | 0.333333 | 0.013433 | LMNA     |
| 13956.12 | 7.709005 | -7068 | 7.67E-05 | 1178 | 0.333333 | 0.017675 | MGMT     |
| 9267.746 | 6.403963 | -7068 | 7.60E-05 | 1088 | 0.333333 | 0.016715 | PRPS2    |
| 4623.033 | 6.946536 | -7068 | 7.40E-05 | 713  | 0.333333 | 0.010536 | AHCTF1   |
| 3539.973 | 7.228929 | -7068 | 7.35E-05 | 614  | 0.333333 | 0.0093   | SPOP     |
| 2311.784 | 6.435939 | -7068 | 7.32E-05 | 541  | 0.333333 | 0.008557 | RYBP     |
| 1979.661 | 7.206486 | -7068 | 7.26E-05 | 444  | 0.333333 | 0.005825 | CD22     |
| 7423.648 | 8.367678 | -7068 | 7.44E-05 | 774  | 0.333333 | 0.011244 | CFAP20   |
| 7434.296 | 8.228888 | -7068 | 7.48E-05 | 826  | 0.333333 | 0.012302 | TMSB4X   |
| 10156.9  | 7.225327 | -7068 | 7.59E-05 | 1048 | 0.333333 | 0.01644  | LPIN1    |
| 3850.368 | 11.77582 | -7068 | 7.26E-05 | 419  | 0.333333 | 0.005498 | PDE6C    |
| 2869.504 | 8.76507  | -7068 | 7.29E-05 | 468  | 0.333333 | 0.006355 | TPPP     |
| 2931.65  | 8.17462  | -7068 | 7.31E-05 | 508  | 0.333333 | 0.00684  | HMOX2    |
| 11626.59 | 6.983249 | -7068 | 7.63E-05 | 1135 | 0.25     | 0.016935 | BCHE     |
| 21558.19 | 6.967857 | -7068 | 7.81E-05 | 1525 | 0.333333 | 0.021096 | PPARG    |
| 12203.26 | 7.848887 | -7068 | 7.60E-05 | 1068 | 0.333333 | 0.016223 | COX6C    |
| 4235.513 | 7.961086 | -7068 | 7.37E-05 | 624  | 0.333333 | 0.009218 | P2RY1    |
| 7492.002 | 8.245536 | -7068 | 7.46E-05 | 799  | 0.333333 | 0.011451 | ADIPOQ   |
| 3446.848 | 7.451156 | -7068 | 7.35E-05 | 599  | 0.333333 | 0.00895  | SLC23A2  |
| 4289.476 | 6.321056 | -7068 | 7.37E-05 | 692  | 0.333333 | 0.008527 | POLR2I   |
| 8336.249 | 7.654101 | -7068 | 7.51E-05 | 911  | 0.333333 | 0.013639 | NOS1     |
| 14357.84 | 7.066954 | -7068 | 7.72E-05 | 1274 | 0.333333 | 0.01966  | UCHL1    |
| 10969.55 | 6.302496 | -7068 | 7.60E-05 | 1146 | 0.333333 | 0.016028 | COL6A3   |
| 5625.994 | 5.950156 | -7068 | 7.45E-05 | 852  | 0.333333 | 0.011578 | CYP2A6   |
| 3459.92  | 7.796805 | -7068 | 7.31E-05 | 557  | 0.333333 | 0.007105 | GRAP2    |
| 4778.265 | 7.267121 | -7068 | 7.41E-05 | 709  | 0.333333 | 0.010467 | ADIPOR2  |
| 16641.59 | 7.378181 | -7068 | 7.71E-05 | 1295 | 0.333333 | 0.018204 | PCK1     |
| 8952.578 | 7.653861 | -7068 | 7.53E-05 | 932  | 0.333333 | 0.013583 | RORB     |
| 10573.71 | 7.279313 | -7068 | 7.60E-05 | 1064 | 0.333333 | 0.015893 | PLP2     |
| 7135.229 | 7.275338 | -7068 | 7.48E-05 | 865  | 0.333333 | 0.012468 | CAMKK2   |

|          |          |       |          |      |          |          |         |
|----------|----------|-------|----------|------|----------|----------|---------|
| 9763.012 | 8.403122 | -7068 | 7.54E-05 | 921  | 0.333333 | 0.013842 | UPP1    |
| 6690.22  | 6.49266  | -7068 | 7.52E-05 | 918  | 0.333333 | 0.014396 | PPM1A   |
| 4698.073 | 7.000496 | -7068 | 7.42E-05 | 731  | 0.333333 | 0.011136 | SEC14L1 |
| 6406.963 | 8.089489 | -7068 | 7.41E-05 | 723  | 0.333333 | 0.009449 | DDC     |
| 8404.441 | 8.064936 | -7068 | 7.50E-05 | 862  | 0.333333 | 0.01273  | SCTR    |
| 6439.392 | 7.247083 | -7068 | 7.44E-05 | 812  | 0.333333 | 0.010899 | MAPK11  |
| 9349.833 | 5.202356 | -7068 | 7.60E-05 | 1216 | 0.333333 | 0.016279 | TOP2A   |
| 8017.566 | 6.823627 | -7068 | 7.52E-05 | 946  | 0.333333 | 0.013444 | SDHB    |
| 5601.854 | 10.58835 | -7068 | 7.34E-05 | 554  | 0.333333 | 0.008327 | SPAG1   |
| 3291.468 | 8.077691 | -7068 | 7.32E-05 | 546  | 0.333333 | 0.007699 | LIMK1   |
| 5374.531 | 6.4082   | -7068 | 7.44E-05 | 806  | 0.333333 | 0.011943 | UBE2N   |
| 3728.078 | 10.4097  | -7068 | 7.27E-05 | 438  | 0.333333 | 0.004758 | CTRL    |
| 2606.992 | 7.646318 | -7068 | 7.28E-05 | 490  | 0.333333 | 0.006697 | IL23A   |
| 5169.978 | 7.605129 | -7068 | 7.41E-05 | 698  | 0.333333 | 0.009807 | CCR7    |
| 2367.979 | 9.192179 | -7068 | 7.25E-05 | 405  | 0.333333 | 0.005272 | SLC30A4 |
| 5779.89  | 8.327479 | -7068 | 7.37E-05 | 660  | 0.333333 | 0.00833  | SULT1A1 |
| 12330.06 | 6.974402 | -7068 | 7.64E-05 | 1156 | 0.333333 | 0.016474 | SPP2    |
| 4075.346 | 8.827244 | -7068 | 7.34E-05 | 571  | 0.333333 | 0.008361 | SLC14A1 |
| 9458.108 | 6.253072 | -7068 | 7.59E-05 | 1104 | 0.333333 | 0.016362 | ATP2A2  |
| 4262.4   | 7.5259   | -7068 | 7.38E-05 | 653  | 0.333333 | 0.009684 | REST    |
| 8278.933 | 5.424689 | -7068 | 7.55E-05 | 1102 | 0.333333 | 0.014923 | IL1R1   |
| 2058.315 | 8.753182 | -7068 | 7.24E-05 | 393  | 0.333333 | 0.005035 | FLT3LG  |
| 2336.397 | 5.882151 | -7068 | 7.33E-05 | 548  | 0.333333 | 0.008747 | YTHDF3  |
| 5852.578 | 6.688184 | -7068 | 7.45E-05 | 830  | 0.333333 | 0.01204  | FOXO3   |
| 3571.462 | 7.377976 | -7068 | 7.36E-05 | 601  | 0.333333 | 0.008755 | RNASE6  |
| 6022.766 | 7.695527 | -7068 | 7.44E-05 | 754  | 0.333333 | 0.010687 | C3AR1   |
| 8294.887 | 7.17179  | -7068 | 7.53E-05 | 949  | 0.333333 | 0.013986 | MEF2D   |
| 3241.277 | 8.252217 | -7068 | 7.30E-05 | 511  | 0.333333 | 0.006661 | CUBN    |
| 6363.145 | 7.910127 | -7068 | 7.44E-05 | 763  | 0.333333 | 0.010665 | VAT1    |
| 4906.787 | 8.134427 | -7068 | 7.38E-05 | 654  | 0.333333 | 0.008811 | CETP    |
| 4356.335 | 7.495761 | -7068 | 7.38E-05 | 662  | 0.333333 | 0.009659 | BRAP    |
| 6434.336 | 7.676141 | -7068 | 7.44E-05 | 785  | 0.333333 | 0.010976 | GSTT1   |
| 8221.048 | 6.69093  | -7068 | 7.57E-05 | 1001 | 0.333333 | 0.015444 | TPD52   |
| 6100.687 | 6.922697 | -7068 | 7.40E-05 | 761  | 0.333333 | 0.009009 | UQCRQ   |
| 3843.172 | 7.687789 | -7068 | 7.36E-05 | 608  | 0.333333 | 0.009316 | ARID4A  |
| 7038.741 | 7.248262 | -7068 | 7.48E-05 | 848  | 0.333333 | 0.01221  | ALDH1A1 |
| 4017.587 | 6.852137 | -7068 | 7.36E-05 | 659  | 0.333333 | 0.008743 | SLC25A6 |
| 14553.43 | 6.999501 | -7068 | 7.70E-05 | 1271 | 0.333333 | 0.019482 | TUSC3   |
| 6751.085 | 9.611161 | -7068 | 7.40E-05 | 666  | 0.333333 | 0.008695 | PLCD1   |
| 6344.732 | 7.205977 | -7068 | 7.41E-05 | 774  | 0.333333 | 0.009861 | PF4     |
| 6058.449 | 6.028138 | -7068 | 7.48E-05 | 885  | 0.333333 | 0.012281 | CASP4   |

|          |          |       |          |      |          |          |          |
|----------|----------|-------|----------|------|----------|----------|----------|
| 17813.57 | 6.786718 | -7068 | 7.77E-05 | 1442 | 0.333333 | 0.020403 | CEBPA    |
| 3565.007 | 7.809894 | -7068 | 7.34E-05 | 578  | 0.333333 | 0.008246 | TLE2     |
| 11862.59 | 5.943068 | -7068 | 7.68E-05 | 1278 | 0.333333 | 0.018646 | PTGIS    |
| 9021.364 | 9.18927  | -7068 | 7.46E-05 | 803  | 0.333333 | 0.011033 | NKX2-2   |
| 3776.858 | 8.915106 | -7068 | 7.31E-05 | 529  | 0.333333 | 0.006752 | MVD      |
| 5970.707 | 7.819988 | -7068 | 7.42E-05 | 745  | 0.333333 | 0.010478 | CD80     |
| 9912.258 | 7.002742 | -7068 | 7.55E-05 | 1044 | 0.333333 | 0.014102 | ORC1     |
| 10971.81 | 6.305272 | -7068 | 7.66E-05 | 1204 | 0.333333 | 0.018627 | GJA1     |
| 4227.659 | 6.329324 | -7068 | 7.36E-05 | 673  | 0.333333 | 0.008189 | SLC22A1  |
| 3876.363 | 7.757768 | -7068 | 7.33E-05 | 584  | 0.333333 | 0.008156 | RHAG     |
| 19666.2  | 6.740057 | -7068 | 7.82E-05 | 1516 | 0.333333 | 0.02236  | IRS2     |
| 10951.16 | 6.717355 | -7068 | 7.58E-05 | 1100 | 0.333333 | 0.014558 | AHSG     |
| 6670.929 | 7.031982 | -7068 | 7.46E-05 | 830  | 0.333333 | 0.011297 | S100B    |
| 6343.589 | 6.187959 | -7068 | 7.50E-05 | 919  | 0.333333 | 0.013378 | MSN      |
| 5431.795 | 8.160742 | -7068 | 7.39E-05 | 699  | 0.333333 | 0.009676 | GADD45G  |
| 7046.689 | 7.375986 | -7068 | 7.46E-05 | 833  | 0.333333 | 0.012088 | RAB27A   |
| 3687.39  | 8.324164 | -7068 | 7.31E-05 | 529  | 0.333333 | 0.00661  | HOXD10   |
| 15249.55 | 6.229551 | -7068 | 7.74E-05 | 1393 | 0.333333 | 0.01984  | FEN1     |
| 4130.8   | 9.711262 | -7068 | 7.30E-05 | 501  | 0.333333 | 0.006234 | IL13     |
| 9202.613 | 5.718028 | -7068 | 7.61E-05 | 1157 | 0.333333 | 0.016919 | CD44     |
| 8109.288 | 6.412966 | -7068 | 7.53E-05 | 994  | 0.333333 | 0.013953 | VDR      |
| 6505.671 | 8.044305 | -7068 | 7.42E-05 | 736  | 0.333333 | 0.010067 | PRF1     |
| 9879.416 | 6.653636 | -7068 | 7.60E-05 | 1089 | 0.333333 | 0.016645 | CCNT2    |
| 2483.699 | 9.603792 | -7068 | 7.26E-05 | 411  | 0.333333 | 0.005726 | ADPRH    |
| 5251.017 | 7.844742 | -7068 | 7.41E-05 | 706  | 0.333333 | 0.010073 | CRIP1    |
| 4397.221 | 7.161133 | -7068 | 7.40E-05 | 696  | 0.333333 | 0.010696 | ERC1     |
| 3501.213 | 8.998004 | -7068 | 7.32E-05 | 519  | 0.333333 | 0.007431 | MTMR11   |
| 4887.556 | 8.555711 | -7068 | 7.36E-05 | 617  | 0.333333 | 0.008384 | CA4      |
| 4272.273 | 7.970601 | -7068 | 7.36E-05 | 619  | 0.333333 | 0.008403 | TNIP1    |
| 7916.768 | 7.071818 | -7068 | 7.53E-05 | 944  | 0.333333 | 0.014793 | HDAC9    |
| 6076.199 | 6.622314 | -7068 | 7.43E-05 | 793  | 0.333333 | 0.01074  | CGA      |
| 14035.1  | 7.905571 | -7068 | 7.65E-05 | 1142 | 0.333333 | 0.017385 | CHST2    |
| 11178.24 | 6.789512 | -7068 | 7.65E-05 | 1157 | 0.333333 | 0.018112 | ZMIZ1    |
| 4448.492 | 7.297518 | -7068 | 7.36E-05 | 645  | 0.333333 | 0.00841  | FCN1     |
| 12123.32 | 8.843917 | -7068 | 7.57E-05 | 974  | 0.333333 | 0.013565 | ATP6V0E2 |
| 3754.694 | 8.168803 | -7068 | 7.35E-05 | 582  | 0.333333 | 0.008353 | ERF      |
| 10886.45 | 6.406435 | -7068 | 7.64E-05 | 1158 | 0.333333 | 0.017083 | KPNA2    |
| 4264.737 | 11.60461 | -7068 | 7.28E-05 | 447  | 0.333333 | 0.005441 | IL1RL2   |
| 13588.86 | 6.544806 | -7068 | 7.71E-05 | 1297 | 0.333333 | 0.019499 | SCD      |
| 5488.174 | 7.485356 | -7068 | 7.42E-05 | 741  | 0.333333 | 0.010979 | FGF5     |
| 4303.007 | 7.270673 | -7068 | 7.39E-05 | 679  | 0.333333 | 0.010664 | CD46     |

|          |          |       |          |      |          |          |          |
|----------|----------|-------|----------|------|----------|----------|----------|
| 18780.16 | 6.37462  | -7068 | 7.86E-05 | 1562 | 0.333333 | 0.024192 | SLC1A1   |
| 6725.534 | 8.066075 | -7068 | 7.45E-05 | 791  | 0.333333 | 0.011794 | MEST     |
| 6387.09  | 7.20579  | -7068 | 7.45E-05 | 806  | 0.333333 | 0.010884 | EPHX1    |
| 7938.353 | 6.699031 | -7068 | 7.55E-05 | 984  | 0.333333 | 0.01547  | PDE4B    |
| 2431.884 | 8.534926 | -7068 | 7.26E-05 | 440  | 0.333333 | 0.006374 | BAG5     |
| 17446.24 | 6.876472 | -7068 | 7.76E-05 | 1403 | 0.333333 | 0.020196 | SMAD6    |
| 8507.105 | 5.831417 | -7068 | 7.57E-05 | 1088 | 0.333333 | 0.015941 | FGF7     |
| 3118.817 | 7.29529  | -7068 | 7.34E-05 | 577  | 0.333333 | 0.008479 | FBXO7    |
| 13748.53 | 6.454042 | -7068 | 7.73E-05 | 1313 | 0.333333 | 0.020191 | RAB31    |
| 7956.324 | 6.462403 | -7068 | 7.55E-05 | 995  | 0.25     | 0.015311 | RGS5     |
| 5141.738 | 7.841529 | -7068 | 7.41E-05 | 700  | 0.333333 | 0.010497 | RBM19    |
| 5850.493 | 7.424495 | -7068 | 7.46E-05 | 780  | 0.333333 | 0.012275 | COX20    |
| 7347.61  | 7.175989 | -7068 | 7.51E-05 | 899  | 0.333333 | 0.013449 | DBT      |
| 4739.837 | 9.16892  | -7068 | 7.35E-05 | 578  | 0.333333 | 0.007866 | MYBPH    |
| 5292.584 | 8.02167  | -7068 | 7.39E-05 | 691  | 0.333333 | 0.009383 | CYP1A1   |
| 6523.961 | 7.103533 | -7068 | 7.49E-05 | 849  | 0.333333 | 0.012873 | PEA15    |
| 13149.59 | 6.90253  | -7068 | 7.68E-05 | 1231 | 0.333333 | 0.019051 | RAD51B   |
| 3434.779 | 8.408954 | -7068 | 7.31E-05 | 524  | 0.333333 | 0.006969 | METTL1   |
| 7718.366 | 7.323806 | -7068 | 7.49E-05 | 889  | 0.333333 | 0.012438 | KRT18    |
| 14509.71 | 7.688445 | -7068 | 7.66E-05 | 1182 | 0.333333 | 0.017463 | MARCKSL1 |
| 2518.674 | 7.962515 | -7068 | 7.28E-05 | 480  | 0.333333 | 0.006733 | WASL     |
| 22269.22 | 6.684516 | -7068 | 7.91E-05 | 1626 | 0.333333 | 0.024471 | ERBB4    |
| 11216.65 | 7.450387 | -7068 | 7.59E-05 | 1047 | 0.333333 | 0.014875 | CD93     |
| 16162.27 | 6.377069 | -7068 | 7.81E-05 | 1445 | 0.333333 | 0.02284  | ESRRG    |
| 3470.918 | 5.997405 | -7068 | 7.39E-05 | 683  | 0.333333 | 0.010599 | PCMT1    |
| 10788.62 | 6.128728 | -7068 | 7.63E-05 | 1180 | 0.333333 | 0.016736 | KIF23    |
| 6246.386 | 7.529749 | -7068 | 7.45E-05 | 783  | 0.333333 | 0.011279 | PLK3     |
| 29305.42 | 6.439395 | -7068 | 8.03E-05 | 1892 | 0.333333 | 0.027438 | ANXA3    |
| 4896.813 | 7.475419 | -7068 | 7.41E-05 | 715  | 0.333333 | 0.010936 | RPP38    |
| 7641.823 | 12.52245 | -7068 | 7.34E-05 | 553  | 0.333333 | 0.006283 | LMF2     |
| 5632.504 | 9.280877 | -7068 | 7.38E-05 | 641  | 0.333333 | 0.008989 | GDPD5    |
| 7250.426 | 7.504361 | -7068 | 7.49E-05 | 855  | 0.333333 | 0.012811 | DYNC1I1  |
| 11693.81 | 6.930932 | -7068 | 7.62E-05 | 1136 | 0.333333 | 0.016385 | SLCO2A1  |
| 6033.572 | 6.311403 | -7068 | 7.47E-05 | 868  | 0.333333 | 0.012656 | UBE2D3   |
| 2644.222 | 9.063926 | -7068 | 7.27E-05 | 443  | 0.333333 | 0.005867 | TH       |
| 3503.241 | 7.786962 | -7068 | 7.34E-05 | 579  | 0.333333 | 0.008711 | GREB1    |
| 8782.998 | 7.461287 | -7068 | 7.52E-05 | 933  | 0.333333 | 0.013257 | SERPINA3 |
| 4233.511 | 9.124785 | -7068 | 7.31E-05 | 539  | 0.333333 | 0.007302 | NKX2-1   |
| 2775.835 | 7.629544 | -7068 | 7.30E-05 | 508  | 0.333333 | 0.007993 | MGAT2    |
| 5333.611 | 6.137911 | -7068 | 7.42E-05 | 823  | 0.333333 | 0.011044 | IKBKB    |
| 8945.572 | 6.731957 | -7068 | 7.58E-05 | 1024 | 0.333333 | 0.015711 | SFRP1    |

|          |          |       |          |      |          |          |         |
|----------|----------|-------|----------|------|----------|----------|---------|
| 2818.53  | 8.773983 | -7068 | 7.28E-05 | 470  | 0.333333 | 0.006335 | FCGBP   |
| 6902.73  | 8.097681 | -7068 | 7.44E-05 | 783  | 0.333333 | 0.010902 | ITPR3   |
| 9339.047 | 7.489834 | -7068 | 7.53E-05 | 955  | 0.333333 | 0.01393  | IL33    |
| 6580.732 | 7.341593 | -7068 | 7.45E-05 | 791  | 0.333333 | 0.010216 | HMGCS2  |
| 15684.91 | 6.584257 | -7068 | 7.77E-05 | 1384 | 0.333333 | 0.021744 | DLC1    |
| 6819.238 | 9.383057 | -7068 | 7.40E-05 | 667  | 0.333333 | 0.008453 | UPK1A   |
| 13009.94 | 6.463165 | -7068 | 7.68E-05 | 1259 | 0.333333 | 0.018592 | CALCRL  |
| 3913.705 | 7.214531 | -7068 | 7.36E-05 | 648  | 0.333333 | 0.009485 | TADA2A  |
| 5807.379 | 5.775928 | -7068 | 7.47E-05 | 892  | 0.333333 | 0.012519 | PSMA2   |
| 7623.675 | 5.942896 | -7068 | 7.53E-05 | 1003 | 0.333333 | 0.013697 | NCAPD2  |
| 5787.802 | 6.683107 | -7068 | 7.44E-05 | 801  | 0.25     | 0.010817 | C7      |
| 7298.786 | 10.5866  | -7068 | 7.37E-05 | 617  | 0.333333 | 0.00757  | PMVK    |
| 6962.96  | 7.226857 | -7068 | 7.48E-05 | 855  | 0.333333 | 0.012191 | STX4    |
| 3846.592 | 8.053699 | -7068 | 7.35E-05 | 580  | 0.333333 | 0.007843 | MRPL49  |
| 14083.43 | 5.512711 | -7068 | 7.76E-05 | 1458 | 0.333333 | 0.020802 | MCM4    |
| 6507.426 | 5.191948 | -7068 | 7.48E-05 | 975  | 0.333333 | 0.012355 | COL6A2  |
| 5362.61  | 8.691821 | -7068 | 7.39E-05 | 645  | 0.333333 | 0.008763 | GJB3    |
| 3983.939 | 5.76339  | -7068 | 7.36E-05 | 711  | 0.333333 | 0.008152 | CYP2E1  |
| 4016.922 | 6.977023 | -7068 | 7.37E-05 | 653  | 0.333333 | 0.009603 | PAK3    |
| 4276.805 | 5.103373 | -7068 | 7.40E-05 | 815  | 0.333333 | 0.010325 | RACK1   |
| 15383.43 | 6.660924 | -7068 | 7.76E-05 | 1370 | 0.333333 | 0.020795 | WDR1    |
| 4950.188 | 7.558908 | -7068 | 7.42E-05 | 705  | 0.333333 | 0.010151 | PLEKHG3 |
| 4957.366 | 6.992782 | -7068 | 7.40E-05 | 733  | 0.333333 | 0.009785 | JUND    |
| 10966.05 | 6.866274 | -7068 | 7.58E-05 | 1096 | 0.333333 | 0.015249 | MTOR    |
| 9944.679 | 6.825959 | -7068 | 7.60E-05 | 1094 | 0.333333 | 0.016432 | IGF2BP3 |
| 2615.036 | 6.255337 | -7068 | 7.31E-05 | 574  | 0.333333 | 0.007744 | SRF     |
| 12542.33 | 5.870434 | -7068 | 7.63E-05 | 1270 | 0.333333 | 0.015493 | PLG     |
| 6269.987 | 6.364284 | -7068 | 7.50E-05 | 892  | 0.333333 | 0.013382 | PTPRE   |
| 9711.932 | 6.460873 | -7068 | 7.60E-05 | 1105 | 0.333333 | 0.016855 | TRIM24  |
| 6258.385 | 11.57678 | -7068 | 7.33E-05 | 568  | 0.333333 | 0.007546 | ZNF239  |
| 5942.247 | 7.847158 | -7068 | 7.44E-05 | 751  | 0.333333 | 0.011432 | TRPA1   |
| 3461.832 | 9.078808 | -7068 | 7.30E-05 | 502  | 0.333333 | 0.006634 | RORC    |
| 9940.508 | 6.655817 | -7068 | 7.60E-05 | 1087 | 0.333333 | 0.016643 | SEMA3C  |
| 9182.528 | 7.040437 | -7068 | 7.56E-05 | 1009 | 0.333333 | 0.015481 | TSC22D2 |
| 6156.409 | 6.671603 | -7068 | 7.49E-05 | 870  | 0.333333 | 0.013636 | API5    |
| 16373.48 | 5.737689 | -7068 | 7.81E-05 | 1548 | 0.333333 | 0.022541 | PDGFRA  |
| 5156.848 | 6.908242 | -7068 | 7.41E-05 | 746  | 0.333333 | 0.010514 | NDUFAF1 |
| 4014.936 | 6.625588 | -7068 | 7.39E-05 | 695  | 0.333333 | 0.010253 | EIF2AK2 |
| 3137.691 | 7.387803 | -7068 | 7.35E-05 | 578  | 0.333333 | 0.009006 | TNFAIP1 |
| 2806.87  | 6.867549 | -7068 | 7.31E-05 | 545  | 0.333333 | 0.007088 | CYP2D6  |
| 5942.567 | 9.171516 | -7068 | 7.39E-05 | 655  | 0.333333 | 0.009311 | SLC18A2 |

|          |          |       |          |      |          |          |           |
|----------|----------|-------|----------|------|----------|----------|-----------|
| 8595.905 | 7.070746 | -7068 | 7.53E-05 | 955  | 0.333333 | 0.013818 | ZFP36     |
| 5461.831 | 6.791187 | -7068 | 7.40E-05 | 755  | 0.333333 | 0.009291 | RAC2      |
| 5459.619 | 9.243758 | -7068 | 7.37E-05 | 625  | 0.333333 | 0.008307 | TRAPPC6A  |
| 10267.66 | 6.578229 | -7068 | 7.60E-05 | 1102 | 0.333333 | 0.01644  | IDS       |
| 15288.46 | 8.082387 | -7068 | 7.66E-05 | 1173 | 0.333333 | 0.017447 | LRIG1     |
| 14862.43 | 6.642066 | -7068 | 7.71E-05 | 1325 | 0.333333 | 0.019165 | IGF1R     |
| 2905.534 | 8.740747 | -7068 | 7.28E-05 | 459  | 0.333333 | 0.006316 | SYT17     |
| 12720.96 | 6.310795 | -7068 | 7.70E-05 | 1276 | 0.333333 | 0.018995 | CEBPD     |
| 8536.36  | 7.15415  | -7068 | 7.52E-05 | 946  | 0.333333 | 0.013656 | ZBTB16    |
| 8587.308 | 8.154809 | -7068 | 7.50E-05 | 866  | 0.333333 | 0.011993 | H6PD      |
| 4534.545 | 4.728641 | -7068 | 7.44E-05 | 887  | 0.333333 | 0.011659 | U2AF1     |
| 4919.584 | 7.610626 | -7068 | 7.39E-05 | 684  | 0.333333 | 0.009859 | EGR2      |
| 5383.1   | 6.703746 | -7068 | 7.45E-05 | 813  | 0.333333 | 0.012795 | MPHOSPH9  |
| 7213.409 | 7.379722 | -7068 | 7.49E-05 | 858  | 0.333333 | 0.012273 | ACP5      |
| 3059.266 | 8.016596 | -7068 | 7.29E-05 | 507  | 0.333333 | 0.006685 | KLK3      |
| 7580.317 | 5.21902  | -7068 | 7.53E-05 | 1085 | 0.333333 | 0.014166 | LMNB1     |
| 8337.795 | 11.66533 | -7068 | 7.36E-05 | 606  | 0.333333 | 0.007265 | MOS       |
| 4561.845 | 7.064765 | -7068 | 7.40E-05 | 705  | 0.333333 | 0.010257 | C21orf33  |
| 6170.16  | 6.743058 | -7068 | 7.47E-05 | 850  | 0.25     | 0.01279  | FRK       |
| 5306.616 | 6.733027 | -7068 | 7.40E-05 | 748  | 0.333333 | 0.008995 | ITIH4     |
| 6260.025 | 7.498059 | -7068 | 7.46E-05 | 806  | 0.25     | 0.012313 | VGLL4     |
| 5899.043 | 6.680207 | -7068 | 7.46E-05 | 832  | 0.333333 | 0.012309 | TNFRSF11A |
| 11766.41 | 6.774112 | -7068 | 7.64E-05 | 1161 | 0.333333 | 0.017212 | NEBL      |
| 4757.088 | 7.113419 | -7068 | 7.39E-05 | 677  | 0.333333 | 0.008979 | VAR5      |
| 6303.057 | 8.571424 | -7068 | 7.39E-05 | 691  | 0.333333 | 0.009559 | LGALS3BP  |
| 7902.117 | 8.4993   | -7068 | 7.46E-05 | 797  | 0.333333 | 0.010545 | KRT8      |
| 2985.425 | 8.011613 | -7068 | 7.31E-05 | 511  | 0.333333 | 0.007632 | KCNC1     |
| 5207.033 | 6.570274 | -7068 | 7.43E-05 | 791  | 0.333333 | 0.011064 | FKBP4     |
| 6726.818 | 7.783325 | -7068 | 7.46E-05 | 807  | 0.333333 | 0.012156 | STX8      |
| 13432.27 | 6.445372 | -7068 | 7.69E-05 | 1285 | 0.333333 | 0.018955 | TGFB2     |
| 5418.622 | 9.616707 | -7068 | 7.37E-05 | 596  | 0.333333 | 0.009069 | ANKRD46   |
| 2218.94  | 7.298674 | -7068 | 7.28E-05 | 468  | 0.333333 | 0.007185 | TM2D1     |
| 6531.586 | 8.666346 | -7068 | 7.43E-05 | 736  | 0.333333 | 0.009993 | EIF4EBP1  |
| 8637.291 | 6.755364 | -7068 | 7.57E-05 | 1019 | 0.333333 | 0.016099 | GSE1      |
| 4415.803 | 7.14025  | -7068 | 7.41E-05 | 702  | 0.333333 | 0.010556 | EI24      |
| 3769.301 | 6.216173 | -7068 | 7.39E-05 | 697  | 0.333333 | 0.010308 | ACTG2     |
| 13776.81 | 6.268259 | -7068 | 7.77E-05 | 1362 | 0.333333 | 0.02185  | QKI       |
| 2361.411 | 5.915153 | -7068 | 7.31E-05 | 548  | 0.333333 | 0.007571 | SLA       |
| 5262.203 | 6.576907 | -7068 | 7.43E-05 | 778  | 0.333333 | 0.011619 | RGS4      |
| 6193.998 | 6.36627  | -7068 | 7.45E-05 | 857  | 0.333333 | 0.011644 | CD28      |
| 8877.205 | 6.698491 | -7068 | 7.54E-05 | 991  | 0.333333 | 0.013231 | LAMB3     |

|          |          |       |          |      |          |          |          |
|----------|----------|-------|----------|------|----------|----------|----------|
| 3588.989 | 7.724889 | -7068 | 7.33E-05 | 573  | 0.333333 | 0.008054 | TUSC2    |
| 4029.128 | 6.020089 | -7068 | 7.41E-05 | 740  | 0.333333 | 0.011037 | METAP2   |
| 17694.22 | 6.566149 | -7068 | 7.77E-05 | 1443 | 0.333333 | 0.020357 | KLF5     |
| 5877.219 | 6.982878 | -7068 | 7.44E-05 | 802  | 0.333333 | 0.011247 | FANCA    |
| 9054.322 | 7.566193 | -7068 | 7.51E-05 | 918  | 0.333333 | 0.012984 | EMILIN1  |
| 5722.572 | 9.005042 | -7068 | 7.40E-05 | 661  | 0.333333 | 0.009006 | MPST     |
| 7562.041 | 6.980015 | -7068 | 7.52E-05 | 920  | 0.333333 | 0.014074 | GGA2     |
| 12138.05 | 6.646767 | -7068 | 7.64E-05 | 1180 | 0.333333 | 0.017042 | CLEC2B   |
| 7743.093 | 6.818732 | -7068 | 7.50E-05 | 904  | 0.333333 | 0.012078 | LY96     |
| 4614.488 | 4.77313  | -7068 | 7.43E-05 | 863  | 0.333333 | 0.010954 | SNRPD3   |
| 16008.73 | 7.159382 | -7068 | 7.74E-05 | 1311 | 0.333333 | 0.020024 | ICOS     |
| 10753.88 | 6.862257 | -7068 | 7.60E-05 | 1100 | 0.333333 | 0.016319 | ENPP1    |
| 10637.67 | 6.814176 | -7068 | 7.64E-05 | 1125 | 0.333333 | 0.017194 | RNASE4   |
| 8170.856 | 6.327608 | -7068 | 7.56E-05 | 1020 | 0.333333 | 0.015005 | PTP4A1   |
| 3409.779 | 8.160048 | -7068 | 7.32E-05 | 540  | 0.333333 | 0.007616 | TRAPPC3  |
| 5736.487 | 7.004007 | -7068 | 7.46E-05 | 812  | 0.333333 | 0.012743 | ARHGAP19 |
| 3332.796 | 7.423355 | -7068 | 7.34E-05 | 581  | 0.333333 | 0.008731 | ATP7A    |
| 9102.574 | 6.806007 | -7068 | 7.53E-05 | 998  | 0.25     | 0.01349  | AOX1     |
| 8092.065 | 6.482106 | -7068 | 7.51E-05 | 973  | 0.333333 | 0.013106 | IGFBP4   |
| 4904.569 | 9.199459 | -7068 | 7.35E-05 | 579  | 0.333333 | 0.00779  | PFKFB4   |
| 1338.095 | 7.530675 | -7068 | 7.22E-05 | 354  | 0.333333 | 0.005157 | NGDN     |
| 7135.776 | 5.98046  | -7068 | 7.54E-05 | 1008 | 0.333333 | 0.014883 | ELAVL1   |
| 1760.3   | 10.66521 | -7068 | 7.20E-05 | 311  | 0.333333 | 0.004048 | ZSCAN9   |
| 5766.76  | 6.581242 | -7068 | 7.45E-05 | 824  | 0.333333 | 0.011576 | FOSB     |
| 11400.56 | 5.999109 | -7068 | 7.63E-05 | 1220 | 0.333333 | 0.016897 | ADH1B    |
| 9791.862 | 7.111    | -7068 | 7.58E-05 | 1042 | 0.333333 | 0.015398 | FKBP5    |
| 3978.289 | 7.087963 | -7068 | 7.38E-05 | 657  | 0.333333 | 0.009356 | PQBP1    |
| 10427.69 | 6.972157 | -7068 | 7.60E-05 | 1078 | 0.333333 | 0.015597 | CXCL13   |
| 2012.527 | 6.232252 | -7068 | 7.30E-05 | 514  | 0.333333 | 0.008264 | AMD1     |
| 5149.624 | 7.062073 | -7068 | 7.43E-05 | 751  | 0.333333 | 0.011351 | PLOD2    |
| 4382.2   | 8.49137  | -7068 | 7.35E-05 | 598  | 0.333333 | 0.008599 | CROT     |
| 3296.436 | 5.986982 | -7068 | 7.32E-05 | 606  | 0.333333 | 0.00787  | UQCRB    |
| 3685.888 | 8.410517 | -7068 | 7.32E-05 | 549  | 0.333333 | 0.007284 | DNTT     |
| 2260.584 | 7.687785 | -7068 | 7.27E-05 | 448  | 0.333333 | 0.006646 | ZNF292   |
| 2521.545 | 7.155314 | -7068 | 7.30E-05 | 506  | 0.333333 | 0.007108 | MX1      |
| 20572.9  | 6.818914 | -7068 | 7.85E-05 | 1529 | 0.333333 | 0.022809 | RORA     |
| 5667.777 | 7.956669 | -7068 | 7.42E-05 | 729  | 0.333333 | 0.011062 | GCNT2    |
| 2250.308 | 7.11316  | -7068 | 7.28E-05 | 479  | 0.333333 | 0.006424 | MED12    |
| 4117.223 | 7.397552 | -7068 | 7.36E-05 | 647  | 0.333333 | 0.008727 | GCDH     |
| 13987.22 | 7.540842 | -7068 | 7.67E-05 | 1187 | 0.333333 | 0.017448 | NDRG1    |
| 3811.692 | 9.497939 | -7068 | 7.29E-05 | 491  | 0.333333 | 0.006105 | CREB3L1  |



|          |          |       |          |      |          |          |          |
|----------|----------|-------|----------|------|----------|----------|----------|
| 5007.617 | 5.563284 | -7068 | 7.43E-05 | 837  | 0.333333 | 0.011242 | CTSS     |
| 15101.87 | 6.962267 | -7068 | 7.71E-05 | 1281 | 0.333333 | 0.019599 | PATJ     |
| 3271.825 | 10.06926 | -7068 | 7.28E-05 | 451  | 0.333333 | 0.006285 | PBX2     |
| 6395.414 | 8.434154 | -7068 | 7.41E-05 | 717  | 0.333333 | 0.010505 | TWIST1   |
| 7569.237 | 7.421957 | -7068 | 7.52E-05 | 899  | 0.333333 | 0.014153 | VPS45    |
| 7936.197 | 6.860547 | -7068 | 7.51E-05 | 942  | 0.333333 | 0.013336 | SLC25A4  |
| 12479.27 | 7.462232 | -7068 | 7.63E-05 | 1096 | 0.333333 | 0.01524  | S100A11  |
| 12907.27 | 6.909394 | -7068 | 7.63E-05 | 1171 | 0.333333 | 0.016097 | HSD17B2  |
| 2405.762 | 8.302245 | -7068 | 7.28E-05 | 451  | 0.333333 | 0.006503 | UBR4     |
| 7917.116 | 7.5642   | -7068 | 7.52E-05 | 909  | 0.333333 | 0.014156 | HMGA2    |
| 5597.369 | 8.173209 | -7068 | 7.42E-05 | 704  | 0.333333 | 0.010075 | SOX3     |
| 11745.82 | 6.944216 | -7068 | 7.65E-05 | 1153 | 0.333333 | 0.017514 | EYA2     |
| 7857.742 | 6.698342 | -7068 | 7.52E-05 | 949  | 0.333333 | 0.013554 | CD86     |
| 7982.427 | 7.226883 | -7068 | 7.53E-05 | 930  | 0.333333 | 0.013883 | WWP2     |
| 1118.413 | 11.21535 | -7068 | 7.14E-05 | 212  | 0.333333 | 0.002615 | LRRC37A3 |
| 4452.671 | 8.622867 | -7068 | 7.35E-05 | 592  | 0.333333 | 0.007951 | VILL     |
| 3180.24  | 9.80056  | -7068 | 7.26E-05 | 438  | 0.333333 | 0.005522 | CRYBB2   |
| 5185.924 | 6.386194 | -7068 | 7.43E-05 | 801  | 0.333333 | 0.010727 | CSTF2    |
| 11379.19 | 8.615667 | -7068 | 7.54E-05 | 946  | 0.333333 | 0.013357 | GUCA1A   |
| 13730.38 | 9.012926 | -7068 | 7.59E-05 | 1062 | 0.333333 | 0.015872 | FABP5    |
| 6639.687 | 5.893079 | -7068 | 7.51E-05 | 963  | 0.333333 | 0.013848 | IGF1     |
| 2021.481 | 8.823908 | -7068 | 7.24E-05 | 388  | 0.333333 | 0.005004 | NPRL2    |
| 5103.248 | 6.839731 | -7068 | 7.41E-05 | 740  | 0.25     | 0.010054 | NR1H4    |
| 8792.467 | 6.759494 | -7068 | 7.55E-05 | 1013 | 0.333333 | 0.014511 | MAP2K6   |
| 6522.972 | 7.029102 | -7068 | 7.48E-05 | 849  | 0.333333 | 0.013042 | COL21A1  |
| 4396.274 | 5.281101 | -7068 | 7.43E-05 | 824  | 0.333333 | 0.01164  | HNRNPA0  |
| 2553.561 | 8.901611 | -7068 | 7.27E-05 | 450  | 0.333333 | 0.006423 | BTN2A1   |
| 5335.95  | 9.541723 | -7068 | 7.34E-05 | 581  | 0.333333 | 0.007605 | NEUROD1  |
| 6815.755 | 5.997232 | -7068 | 7.53E-05 | 971  | 0.333333 | 0.015018 | SDHD     |
| 2349.652 | 11.75291 | -7068 | 7.21E-05 | 318  | 0.333333 | 0.003975 | MSH4     |
| 4487.825 | 7.706304 | -7068 | 7.37E-05 | 661  | 0.333333 | 0.009434 | ASNS     |
| 15170.26 | 6.919252 | -7068 | 7.71E-05 | 1291 | 0.333333 | 0.018961 | TRIM29   |
| 6595.845 | 6.920664 | -7068 | 7.49E-05 | 865  | 0.333333 | 0.012744 | FDFT1    |
| 4649.4   | 5.643862 | -7068 | 7.43E-05 | 811  | 0.333333 | 0.011406 | RAB1A    |
| 15341.51 | 6.57976  | -7068 | 7.75E-05 | 1366 | 0.333333 | 0.020743 | MITF     |
| 5308.224 | 7.504716 | -7068 | 7.38E-05 | 706  | 0.333333 | 0.009376 | LSM7     |
| 4125.291 | 7.731218 | -7068 | 7.35E-05 | 603  | 0.333333 | 0.008008 | PGC      |
| 11598.11 | 7.308689 | -7068 | 7.56E-05 | 1050 | 0.333333 | 0.014094 | KRT15    |
| 2752.556 | 8.163951 | -7068 | 7.30E-05 | 492  | 0.333333 | 0.006886 | PYGB     |
| 5587.648 | 8.307059 | -7068 | 7.41E-05 | 702  | 0.333333 | 0.00988  | TP53I3   |
| 6053.978 | 6.924201 | -7068 | 7.45E-05 | 819  | 0.333333 | 0.011922 | IL1R2    |

|          |          |       |          |      |          |          |          |
|----------|----------|-------|----------|------|----------|----------|----------|
| 7499.368 | 6.77977  | -7068 | 7.48E-05 | 892  | 0.333333 | 0.011727 | IL1B     |
| 4782.549 | 7.999333 | -7068 | 7.31E-05 | 567  | 0.333333 | 0.006989 | ZNF273   |
| 3918.118 | 7.853273 | -7068 | 7.35E-05 | 602  | 0.333333 | 0.008904 | SEMA3E   |
| 4554.27  | 8.64258  | -7068 | 7.34E-05 | 597  | 0.333333 | 0.007903 | MAFK     |
| 5206.606 | 9.132433 | -7068 | 7.37E-05 | 631  | 0.333333 | 0.009009 | NRL      |
| 3728.016 | 8.764383 | -7068 | 7.31E-05 | 533  | 0.333333 | 0.007137 | CHRNA4   |
| 11054.49 | 6.409639 | -7068 | 7.65E-05 | 1182 | 0.333333 | 0.018341 | TLE4     |
| 9633.052 | 6.085954 | -7068 | 7.61E-05 | 1127 | 0.333333 | 0.016841 | TJP1     |
| 13392.46 | 6.640032 | -7068 | 7.71E-05 | 1267 | 0.333333 | 0.019645 | CDH12    |
| 2611.916 | 8.039795 | -7068 | 7.28E-05 | 473  | 0.333333 | 0.006618 | PCDH8    |
| 3459     | 8.002004 | -7068 | 7.33E-05 | 564  | 0.333333 | 0.007977 | CAMK2G   |
| 5650.48  | 6.333516 | -7068 | 7.43E-05 | 821  | 0.333333 | 0.010837 | POLR2C   |
| 5505.731 | 9.552808 | -7068 | 7.36E-05 | 605  | 0.333333 | 0.007973 | NOS3     |
| 12733.51 | 6.25603  | -7068 | 7.71E-05 | 1303 | 0.333333 | 0.019953 | NUP98    |
| 3485.755 | 8.058316 | -7068 | 7.33E-05 | 548  | 0.333333 | 0.007478 | FXR2     |
| 2082.271 | 7.495714 | -7068 | 7.27E-05 | 450  | 0.333333 | 0.006464 | CDS1     |
| 7321.844 | 7.001587 | -7068 | 7.50E-05 | 899  | 0.333333 | 0.013498 | STX3     |
| 7410.296 | 9.129998 | -7068 | 7.44E-05 | 734  | 0.333333 | 0.010122 | CASP5    |
| 4965.703 | 7.348956 | -7068 | 7.42E-05 | 727  | 0.333333 | 0.011147 | SLC30A1  |
| 4357.462 | 10.01472 | -7068 | 7.33E-05 | 530  | 0.333333 | 0.007135 | P2RY2    |
| 6940.52  | 6.420985 | -7068 | 7.51E-05 | 913  | 0.333333 | 0.013201 | CDKN3    |
| 11582.78 | 7.113157 | -7068 | 7.61E-05 | 1123 | 0.333333 | 0.016428 | PRDX6    |
| 4819.628 | 7.451427 | -7068 | 7.40E-05 | 695  | 0.333333 | 0.00999  | CLK3     |
| 4619.745 | 8.469464 | -7068 | 7.36E-05 | 612  | 0.333333 | 0.008701 | ELAVL2   |
| 13122.96 | 6.277841 | -7068 | 7.70E-05 | 1298 | 0.25     | 0.019066 | SPP1     |
| 1659.916 | 8.020893 | -7068 | 7.23E-05 | 388  | 0.333333 | 0.005666 | BRD3     |
| 7654.482 | 6.120567 | -7068 | 7.54E-05 | 1011 | 0.333333 | 0.015055 | NR2F2    |
| 10733.64 | 8.417317 | -7068 | 7.53E-05 | 936  | 0.333333 | 0.014302 | RHOBTB1  |
| 14628.23 | 6.884675 | -7068 | 7.74E-05 | 1297 | 0.333333 | 0.020337 | LSAMP    |
| 6960.059 | 8.274638 | -7068 | 7.45E-05 | 783  | 0.333333 | 0.011769 | ADRB1    |
| 7092.352 | 7.08378  | -7068 | 7.50E-05 | 882  | 0.333333 | 0.013365 | WNT5A    |
| 5596.981 | 8.527279 | -7068 | 7.39E-05 | 667  | 0.333333 | 0.009145 | FSTL3    |
| 3376.131 | 10.19854 | -7068 | 7.28E-05 | 459  | 0.333333 | 0.006714 | CLGN     |
| 13010.63 | 7.137222 | -7068 | 7.66E-05 | 1186 | 0.333333 | 0.017666 | TYRO3    |
| 7328.789 | 6.321156 | -7068 | 7.54E-05 | 976  | 0.333333 | 0.015208 | AKAP12   |
| 9223.878 | 12.68313 | -7068 | 7.37E-05 | 605  | 0.333333 | 0.007888 | ATP6V1G2 |
| 2683.125 | 6.58249  | -7068 | 7.34E-05 | 577  | 0.333333 | 0.009385 | RSRC2    |
| 13504.41 | 6.64778  | -7068 | 7.71E-05 | 1284 | 0.333333 | 0.019684 | GAS7     |
| 4322.823 | 8.684603 | -7068 | 7.34E-05 | 565  | 0.333333 | 0.007182 | MTX1     |
| 2890.555 | 8.233376 | -7068 | 7.31E-05 | 495  | 0.333333 | 0.006635 | MBD3     |
| 9093.285 | 5.917025 | -7068 | 7.61E-05 | 1137 | 0.333333 | 0.01727  | RAB2A    |

|          |          |       |          |      |          |          |          |
|----------|----------|-------|----------|------|----------|----------|----------|
| 6751.145 | 6.918691 | -7068 | 7.48E-05 | 861  | 0.333333 | 0.012533 | LPL      |
| 5798.231 | 9.061006 | -7068 | 7.38E-05 | 647  | 0.333333 | 0.008637 | CRAT     |
| 7323.495 | 6.710672 | -7068 | 7.50E-05 | 926  | 0.333333 | 0.013713 | PDIA4    |
| 3010.564 | 9.151027 | -7068 | 7.28E-05 | 455  | 0.333333 | 0.006195 | MYL1     |
| 8434.515 | 5.696034 | -7068 | 7.58E-05 | 1102 | 0.333333 | 0.016174 | LTBP1    |
| 3612.722 | 5.477545 | -7068 | 7.35E-05 | 687  | 0.333333 | 0.00824  | C1QB     |
| 4559.484 | 7.362493 | -7068 | 7.39E-05 | 699  | 0.333333 | 0.010308 | PRKX     |
| 6135.265 | 7.310796 | -7068 | 7.45E-05 | 792  | 0.333333 | 0.01118  | SORD     |
| 4681.541 | 6.177486 | -7068 | 7.41E-05 | 762  | 0.333333 | 0.010645 | SMTN     |
| 2558.548 | 8.876547 | -7068 | 7.26E-05 | 424  | 0.333333 | 0.005413 | PSG11    |
| 3854.737 | 7.717957 | -7068 | 7.36E-05 | 604  | 0.333333 | 0.009166 | ARHGAP12 |
| 12656.63 | 6.097525 | -7068 | 7.71E-05 | 1304 | 0.333333 | 0.019829 | EPHA4    |
| 7265.272 | 6.52977  | -7068 | 7.49E-05 | 908  | 0.333333 | 0.012163 | IFITM2   |
| 3804.658 | 6.491298 | -7068 | 7.34E-05 | 641  | 0.25     | 0.007897 | F13B     |
| 7161.364 | 5.813389 | -7068 | 7.54E-05 | 1014 | 0.333333 | 0.014432 | XRCC6    |
| 1929.202 | 9.434311 | -7068 | 7.23E-05 | 363  | 0.333333 | 0.00478  | FAM155B  |
| 7339.162 | 8.071099 | -7068 | 7.49E-05 | 820  | 0.333333 | 0.012206 | SBF1     |
| 9556.612 | 7.240543 | -7068 | 7.56E-05 | 1007 | 0.333333 | 0.015135 | NECTIN3  |
| 3880.93  | 7.439056 | -7068 | 7.38E-05 | 636  | 0.333333 | 0.009621 | TRAK1    |
| 6273.736 | 6.435768 | -7068 | 7.45E-05 | 837  | 0.333333 | 0.01091  | ADH1A    |
| 13207.18 | 7.35186  | -7068 | 7.65E-05 | 1156 | 0.333333 | 0.017048 | STEAP1   |
| 2685.712 | 7.646738 | -7068 | 7.31E-05 | 512  | 0.25     | 0.007665 | PPM1E    |
| 6155.516 | 7.496354 | -7068 | 7.44E-05 | 779  | 0.333333 | 0.011302 | PRLR     |
| 6817.605 | 7.963238 | -7068 | 7.45E-05 | 784  | 0.333333 | 0.011783 | PDE10A   |
| 4353.826 | 6.492299 | -7068 | 7.39E-05 | 727  | 0.333333 | 0.009975 | CCNE1    |
| 12675.54 | 6.853649 | -7068 | 7.67E-05 | 1210 | 0.333333 | 0.018072 | PIK3CD   |
| 1814.38  | 9.409368 | -7068 | 7.23E-05 | 356  | 0.25     | 0.004832 | SLC9A8   |
| 13630.86 | 6.808619 | -7068 | 7.70E-05 | 1254 | 0.333333 | 0.019325 | CXADR    |
| 5142.26  | 6.252354 | -7068 | 7.44E-05 | 810  | 0.333333 | 0.011048 | FDPS     |
| 4296.527 | 6.803609 | -7068 | 7.40E-05 | 717  | 0.333333 | 0.010381 | BID      |
| 12757.09 | 6.878221 | -7068 | 7.67E-05 | 1205 | 0.333333 | 0.018151 | THRB     |
| 7171.237 | 5.106631 | -7068 | 7.53E-05 | 1082 | 0.333333 | 0.014434 | FOS      |
| 17561.7  | 6.854298 | -7068 | 7.80E-05 | 1427 | 0.333333 | 0.0217   | SEMA3A   |
| 5103.515 | 9.405521 | -7068 | 7.37E-05 | 615  | 0.333333 | 0.008906 | DOT1L    |
| 5500.264 | 8.602605 | -7068 | 7.39E-05 | 654  | 0.333333 | 0.009016 | ECM1     |
| 6271.753 | 6.763119 | -7068 | 7.50E-05 | 874  | 0.333333 | 0.013339 | ATP1B3   |
| 7911.39  | 6.351795 | -7068 | 7.55E-05 | 1017 | 0.333333 | 0.015262 | ALDH7A1  |
| 2551.864 | 8.169241 | -7068 | 7.28E-05 | 464  | 0.333333 | 0.005969 | EPO      |
| 3476.938 | 7.179098 | -7068 | 7.33E-05 | 586  | 0.333333 | 0.007995 | FOLR2    |
| 10432.58 | 7.616706 | -7068 | 7.58E-05 | 1013 | 0.333333 | 0.015368 | KCNK2    |
| 4829.652 | 7.176976 | -7068 | 7.40E-05 | 724  | 0.333333 | 0.010583 | TAF1     |

|          |          |       |          |      |          |          |         |
|----------|----------|-------|----------|------|----------|----------|---------|
| 3969.383 | 8.123313 | -7068 | 7.34E-05 | 588  | 0.333333 | 0.008001 | BIK     |
| 7382.597 | 6.252939 | -7068 | 7.52E-05 | 981  | 0.333333 | 0.014565 | DMD     |
| 4227.732 | 8.152831 | -7068 | 7.36E-05 | 610  | 0.333333 | 0.008547 | GALNS   |
| 3505.996 | 7.503794 | -7068 | 7.34E-05 | 593  | 0.333333 | 0.008488 | RNF8    |
| 5140.319 | 7.202168 | -7068 | 7.43E-05 | 755  | 0.25     | 0.012072 | CDC14A  |
| 3939.583 | 7.508971 | -7068 | 7.29E-05 | 547  | 0.333333 | 0.006276 | NDUFA1  |
| 6040.559 | 11.80507 | -7068 | 7.31E-05 | 500  | 0.333333 | 0.006061 | PROP1   |
| 3436.445 | 6.720201 | -7068 | 7.33E-05 | 607  | 0.333333 | 0.007882 | IRF9    |
| 6813.504 | 6.855812 | -7068 | 7.46E-05 | 852  | 0.333333 | 0.011339 | FDX1    |
| 4799.876 | 7.636303 | -7068 | 7.39E-05 | 688  | 0.333333 | 0.009856 | TNFSF11 |
| 6482.258 | 7.540109 | -7068 | 7.46E-05 | 816  | 0.333333 | 0.012009 | TXNRD2  |
| 3252.632 | 8.511048 | -7068 | 7.30E-05 | 480  | 0.333333 | 0.005676 | PRODH2  |
| 4383.439 | 6.91761  | -7068 | 7.40E-05 | 697  | 0.333333 | 0.009845 | ARF3    |
| 4576.347 | 5.857193 | -7068 | 7.44E-05 | 807  | 0.333333 | 0.012387 | TCEA1   |
| 6847.045 | 7.600914 | -7068 | 7.46E-05 | 811  | 0.333333 | 0.010745 | ASL     |
| 4668.573 | 6.69646  | -7068 | 7.42E-05 | 733  | 0.333333 | 0.011088 | TNFAIP6 |
| 7670.879 | 8.078046 | -7068 | 7.48E-05 | 838  | 0.333333 | 0.012502 | SLC2A5  |
| 9561.792 | 9.582631 | -7068 | 7.48E-05 | 824  | 0.333333 | 0.012188 | CRABP1  |
| 8179.321 | 4.126456 | -7068 | 7.57E-05 | 1263 | 0.333333 | 0.015222 | CCNA2   |
| 4162.841 | 6.756286 | -7068 | 7.41E-05 | 695  | 0.333333 | 0.011057 | ARL6IP1 |
| 9299.832 | 7.72378  | -7068 | 7.54E-05 | 953  | 0.333333 | 0.014637 | PAX3    |
| 1578.579 | 8.55834  | -7068 | 7.22E-05 | 345  | 0.333333 | 0.004659 | SFTPC   |
| 1314.24  | 9.203894 | -7068 | 7.20E-05 | 304  | 0.333333 | 0.004318 | DPYSL4  |
| 5979.457 | 9.364294 | -7068 | 7.37E-05 | 627  | 0.333333 | 0.008121 | TSSK2   |
| 10908.75 | 7.204351 | -7068 | 7.59E-05 | 1053 | 0.333333 | 0.015679 | INPP4B  |
| 6377.678 | 6.112351 | -7068 | 7.52E-05 | 943  | 0.333333 | 0.015018 | GCLM    |
| 5180.656 | 6.668336 | -7068 | 7.42E-05 | 765  | 0.333333 | 0.010932 | DSC2    |
| 5832.324 | 6.769774 | -7068 | 7.47E-05 | 825  | 0.333333 | 0.012688 | RAB14   |
| 5414.067 | 7.390492 | -7068 | 7.42E-05 | 737  | 0.333333 | 0.010738 | GAS6    |
| 19688.61 | 6.64766  | -7068 | 7.84E-05 | 1542 | 0.333333 | 0.023159 | VEGFA   |
| 2040.106 | 8.996693 | -7068 | 7.23E-05 | 379  | 0.333333 | 0.004743 | VPS11   |
| 7488.525 | 7.493788 | -7068 | 7.49E-05 | 866  | 0.333333 | 0.013078 | NFAT5   |
| 7688.107 | 6.241709 | -7068 | 7.53E-05 | 989  | 0.333333 | 0.014395 | UBE2D1  |
| 3509.951 | 9.733533 | -7068 | 7.29E-05 | 464  | 0.333333 | 0.005721 | ABCA2   |
| 7500.478 | 10.47477 | -7068 | 7.39E-05 | 664  | 0.333333 | 0.009381 | FABP6   |
| 14700.5  | 7.061851 | -7068 | 7.70E-05 | 1266 | 0.333333 | 0.018656 | MBP     |
| 9813.962 | 8.366085 | -7068 | 7.52E-05 | 915  | 0.333333 | 0.013272 | SREBF2  |
| 2875.537 | 7.562786 | -7068 | 7.31E-05 | 528  | 0.333333 | 0.007509 | AP3D1   |
| 4607.045 | 8.284952 | -7068 | 7.38E-05 | 637  | 0.333333 | 0.009098 | BNIP1   |
| 2523.032 | 7.839047 | -7068 | 7.30E-05 | 493  | 0.333333 | 0.007465 | GPR107  |
| 5020.184 | 7.175739 | -7068 | 7.40E-05 | 724  | 0.333333 | 0.010449 | EPOR    |

|          |          |       |          |      |          |          |          |
|----------|----------|-------|----------|------|----------|----------|----------|
| 4846.131 | 8.322404 | -7068 | 7.38E-05 | 633  | 0.333333 | 0.008861 | BCAM     |
| 1680.257 | 6.941777 | -7068 | 7.26E-05 | 432  | 0.333333 | 0.006621 | CREBZF   |
| 6975.121 | 7.626266 | -7068 | 7.46E-05 | 806  | 0.333333 | 0.011257 | SLC7A7   |
| 4247.841 | 6.79887  | -7068 | 7.40E-05 | 701  | 0.333333 | 0.010071 | ACADL    |
| 9147.668 | 7.334767 | -7068 | 7.55E-05 | 985  | 0.333333 | 0.01536  | GIT2     |
| 6874.78  | 7.358446 | -7068 | 7.49E-05 | 852  | 0.333333 | 0.012944 | AKIRIN2  |
| 5121.104 | 12.17115 | -7068 | 7.28E-05 | 453  | 0.333333 | 0.005313 | WNT10B   |
| 13359.79 | 6.379533 | -7068 | 7.71E-05 | 1318 | 0.333333 | 0.019853 | MYO1B    |
| 4100.023 | 6.726495 | -7068 | 7.40E-05 | 689  | 0.333333 | 0.010188 | MMP1     |
| 6580.167 | 14.05421 | -7068 | 7.32E-05 | 518  | 0.333333 | 0.006659 | ZNF282   |
| 5600.772 | 6.266781 | -7068 | 7.44E-05 | 825  | 0.333333 | 0.011341 | TPM2     |
| 4747.778 | 8.416102 | -7068 | 7.38E-05 | 642  | 0.333333 | 0.009749 | CX3CR1   |
| 3070.276 | 7.549281 | -7068 | 7.33E-05 | 565  | 0.333333 | 0.008873 | OSBP     |
| 13864.01 | 6.975154 | -7068 | 7.68E-05 | 1236 | 0.333333 | 0.018288 | MYOM2    |
| 7214.96  | 8.331475 | -7068 | 7.44E-05 | 787  | 0.333333 | 0.011328 | PDCD6    |
| 7392.208 | 8.002815 | -7068 | 7.46E-05 | 804  | 0.333333 | 0.01167  | SERPINB2 |
| 1380.325 | 9.720974 | -7068 | 7.20E-05 | 292  | 0.333333 | 0.003566 | GIPR     |
| 2379.178 | 8.890978 | -7068 | 7.27E-05 | 424  | 0.333333 | 0.005814 | ARC      |
| 4549.297 | 6.900289 | -7068 | 7.42E-05 | 707  | 0.333333 | 0.010181 | IFITM1   |
| 13921.65 | 6.463839 | -7068 | 7.69E-05 | 1296 | 0.333333 | 0.018956 | KLF9     |
| 4710.997 | 8.551536 | -7068 | 7.29E-05 | 546  | 0.333333 | 0.006559 | ZNF91    |
| 17493.69 | 6.618454 | -7068 | 7.80E-05 | 1447 | 0.333333 | 0.022017 | SNX7     |
| 6672.088 | 7.2988   | -7068 | 7.46E-05 | 809  | 0.333333 | 0.011711 | HBB      |
| 5224.353 | 7.355018 | -7068 | 7.42E-05 | 725  | 0.333333 | 0.010718 | JAKMIP2  |
| 3258.554 | 8.902887 | -7068 | 7.31E-05 | 495  | 0.333333 | 0.006716 | TRPV6    |
| 3059.678 | 5.782026 | -7068 | 7.34E-05 | 629  | 0.333333 | 0.008175 | POLR2J   |
| 7699.1   | 7.980078 | -7068 | 7.48E-05 | 842  | 0.333333 | 0.012516 | TACR1    |
| 6263.157 | 6.852489 | -7068 | 7.46E-05 | 829  | 0.333333 | 0.011975 | IL1RL1   |
| 5452.753 | 8.256373 | -7068 | 7.40E-05 | 681  | 0.333333 | 0.009701 | IL2      |
| 13252.86 | 6.091397 | -7068 | 7.72E-05 | 1344 | 0.333333 | 0.019697 | COL18A1  |
| 7393.01  | 7.215896 | -7068 | 7.48E-05 | 869  | 0.333333 | 0.011907 | IL1RN    |
| 3944.973 | 6.362769 | -7068 | 7.38E-05 | 698  | 0.333333 | 0.009865 | RAB8A    |
| 5641.352 | 6.90205  | -7068 | 7.46E-05 | 809  | 0.333333 | 0.012258 | ZC3HAV1  |
| 4997.956 | 8.505788 | -7068 | 7.37E-05 | 626  | 0.333333 | 0.008832 | SULT1C2  |
| 10421.51 | 6.451269 | -7068 | 7.62E-05 | 1133 | 0.333333 | 0.01686  | TFPI2    |
| 5474.804 | 8.069267 | -7068 | 7.41E-05 | 711  | 0.333333 | 0.010219 | ALDH1B1  |
| 2608.881 | 7.034042 | -7068 | 7.30E-05 | 520  | 0.333333 | 0.007409 | SNX1     |
| 8169.506 | 8.573257 | -7068 | 7.47E-05 | 825  | 0.333333 | 0.011953 | CDK5R1   |
| 6532.936 | 7.698284 | -7068 | 7.46E-05 | 801  | 0.333333 | 0.01207  | DEPDC5   |
| 7258.859 | 7.17138  | -7068 | 7.50E-05 | 882  | 0.333333 | 0.013602 | RAB28    |
| 7859.925 | 6.519642 | -7068 | 7.55E-05 | 990  | 0.333333 | 0.014977 | MCCC2    |

|          |          |       |          |      |          |          |           |
|----------|----------|-------|----------|------|----------|----------|-----------|
| 6343.015 | 9.47417  | -7068 | 7.39E-05 | 669  | 0.333333 | 0.009772 | LDHC      |
| 6233.91  | 8.700635 | -7068 | 7.39E-05 | 694  | 0.333333 | 0.009481 | IL10      |
| 11884.19 | 7.19352  | -7068 | 7.62E-05 | 1128 | 0.333333 | 0.016878 | NR5A2     |
| 6486.515 | 7.199185 | -7068 | 7.46E-05 | 820  | 0.333333 | 0.010964 | AKR1B1    |
| 5753.114 | 9.148036 | -7068 | 7.38E-05 | 647  | 0.333333 | 0.009089 | FGF8      |
| 5400.625 | 7.081514 | -7068 | 7.41E-05 | 733  | 0.333333 | 0.009714 | KRT6A     |
| 3021.199 | 6.908034 | -7068 | 7.34E-05 | 590  | 0.333333 | 0.008914 | NMT1      |
| 15914.38 | 6.458056 | -7068 | 7.77E-05 | 1409 | 0.333333 | 0.021583 | EDNRB     |
| 6567.174 | 6.561545 | -7068 | 7.50E-05 | 906  | 0.333333 | 0.013848 | TES       |
| 11053.33 | 6.691928 | -7068 | 7.65E-05 | 1158 | 0.333333 | 0.017886 | ST3GAL1   |
| 3935.718 | 7.899502 | -7068 | 7.36E-05 | 601  | 0.333333 | 0.008996 | LHX2      |
| 6132.792 | 7.658059 | -7068 | 7.45E-05 | 780  | 0.333333 | 0.011608 | UGDH      |
| 8762.538 | 5.615237 | -7068 | 7.56E-05 | 1104 | 0.333333 | 0.014899 | CENPE     |
| 14698.92 | 7.259003 | -7068 | 7.68E-05 | 1233 | 0.333333 | 0.017937 | MRC2      |
| 3293.195 | 6.81589  | -7068 | 7.34E-05 | 615  | 0.333333 | 0.009051 | TBL1X     |
| 1327.551 | 6.658476 | -7068 | 7.24E-05 | 392  | 0.333333 | 0.00598  | KDM6A     |
| 3739.339 | 7.751564 | -7068 | 7.36E-05 | 606  | 0.333333 | 0.008907 | NRF1      |
| 4874.316 | 5.968123 | -7068 | 7.42E-05 | 788  | 0.333333 | 0.010516 | MDH2      |
| 20914.19 | 7.453234 | -7068 | 7.82E-05 | 1455 | 0.333333 | 0.021946 | NTRK3     |
| 10529.87 | 6.840044 | -7068 | 7.60E-05 | 1095 | 0.333333 | 0.015933 | FGF1      |
| 2167.451 | 7.91975  | -7068 | 7.26E-05 | 439  | 0.333333 | 0.005982 | MAST2     |
| 3600.051 | 7.759434 | -7068 | 7.33E-05 | 573  | 0.333333 | 0.007314 | LCAT      |
| 6825.074 | 6.791555 | -7068 | 7.47E-05 | 865  | 0.333333 | 0.011856 | EXO1      |
| 9947.873 | 7.016103 | -7068 | 7.56E-05 | 1026 | 0.333333 | 0.014441 | IDH1      |
| 7266.395 | 5.636336 | -7068 | 7.50E-05 | 1011 | 0.333333 | 0.013232 | JAK2      |
| 20507.02 | 6.598095 | -7068 | 7.89E-05 | 1588 | 0.333333 | 0.024575 | TNIF      |
| 4895.208 | 6.815061 | -7068 | 7.44E-05 | 767  | 0.333333 | 0.012244 | CDV3      |
| 6153.175 | 8.528915 | -7068 | 7.39E-05 | 674  | 0.333333 | 0.008627 | CLDN4     |
| 4405.741 | 7.494268 | -7068 | 7.39E-05 | 670  | 0.333333 | 0.010161 | ERLIN2    |
| 8217.078 | 6.130584 | -7068 | 7.52E-05 | 1028 | 0.333333 | 0.013272 | E2F1      |
| 7785.045 | 7.163207 | -7068 | 7.47E-05 | 884  | 0.333333 | 0.011612 | ITGB4     |
| 10357.02 | 7.333831 | -7068 | 7.58E-05 | 1042 | 0.333333 | 0.015065 | GFPT2     |
| 7538.724 | 7.168264 | -7068 | 7.49E-05 | 890  | 0.333333 | 0.012282 | NQO2      |
| 7253.834 | 6.512039 | -7068 | 7.54E-05 | 953  | 0.333333 | 0.015251 | KIDINS220 |
| 3388.97  | 9.226194 | -7068 | 7.30E-05 | 494  | 0.333333 | 0.007073 | AIPL1     |
| 3951.477 | 7.504121 | -7068 | 7.37E-05 | 626  | 0.333333 | 0.009112 | DDAH2     |
| 3487.878 | 7.348894 | -7068 | 7.35E-05 | 596  | 0.333333 | 0.008178 | CYBA      |
| 5621.926 | 7.371756 | -7068 | 7.44E-05 | 767  | 0.333333 | 0.011465 | NFIX      |
| 8985.272 | 7.057164 | -7068 | 7.56E-05 | 996  | 0.333333 | 0.015323 | PIAS2     |
| 640.7708 | 8.634086 | -7068 | 7.15E-05 | 228  | 0.25     | 0.003178 | BBS9      |
| 2179.156 | 7.220849 | -7068 | 7.30E-05 | 482  | 0.333333 | 0.007452 | NEMF      |

|          |          |       |          |      |          |          |         |
|----------|----------|-------|----------|------|----------|----------|---------|
| 6074.498 | 6.388894 | -7068 | 7.51E-05 | 886  | 0.333333 | 0.014138 | NEMP1   |
| 15374.5  | 6.721223 | -7068 | 7.68E-05 | 1289 | 0.333333 | 0.017703 | C1S     |
| 7254.16  | 8.236033 | -7068 | 7.46E-05 | 784  | 0.333333 | 0.011015 | CLEC11A |
| 3863.407 | 6.578771 | -7068 | 7.35E-05 | 635  | 0.333333 | 0.008103 | CYP2C19 |
| 5888.243 | 6.223196 | -7068 | 7.49E-05 | 887  | 0.333333 | 0.013685 | BNIP3L  |
| 9782.98  | 7.254201 | -7068 | 7.56E-05 | 1014 | 0.333333 | 0.014617 | RHOB    |
| 4267.9   | 8.177825 | -7068 | 7.36E-05 | 618  | 0.333333 | 0.009214 | DYRK3   |
| 4094.988 | 6.44046  | -7068 | 7.40E-05 | 710  | 0.333333 | 0.01074  | PDCD2   |
| 12347.36 | 6.505208 | -7068 | 7.64E-05 | 1213 | 0.333333 | 0.017271 | IFNG    |
| 3001.337 | 9.647508 | -7068 | 7.26E-05 | 425  | 0.333333 | 0.005179 | PLA2G1B |
| 5665.081 | 5.934135 | -7068 | 7.46E-05 | 856  | 0.333333 | 0.011764 | IL6     |
| 9556.033 | 6.742424 | -7068 | 7.58E-05 | 1058 | 0.333333 | 0.015292 | EPHB2   |
| 4065.966 | 8.244653 | -7068 | 7.36E-05 | 602  | 0.333333 | 0.008641 | ARL3    |
| 10197.27 | 6.846008 | -7068 | 7.62E-05 | 1101 | 0.333333 | 0.017017 | CREB3L2 |
| 14280.96 | 6.962402 | -7068 | 7.68E-05 | 1246 | 0.333333 | 0.017857 | LOX     |
| 5126.771 | 7.780396 | -7068 | 7.42E-05 | 712  | 0.333333 | 0.010791 | THOC5   |
| 3924.89  | 7.311813 | -7068 | 7.35E-05 | 634  | 0.333333 | 0.008851 | MR1     |
| 2911.229 | 9.556894 | -7068 | 7.26E-05 | 420  | 0.333333 | 0.005175 | SEMA7A  |
| 6466.934 | 9.212862 | -7068 | 7.40E-05 | 674  | 0.333333 | 0.009631 | ARAP1   |
| 7587.341 | 6.062508 | -7068 | 7.54E-05 | 1025 | 0.333333 | 0.015073 | EZR     |
| 3700.963 | 7.375974 | -7068 | 7.35E-05 | 618  | 0.333333 | 0.009029 | IPO8    |
| 3466.754 | 8.703927 | -7068 | 7.30E-05 | 509  | 0.333333 | 0.006569 | PDK2    |
| 4198.096 | 6.219965 | -7068 | 7.43E-05 | 741  | 0.333333 | 0.011551 | NASP    |
| 4302.984 | 7.515855 | -7068 | 7.31E-05 | 585  | 0.333333 | 0.006772 | NDUFB7  |
| 6053.618 | 6.752698 | -7068 | 7.48E-05 | 846  | 0.333333 | 0.013003 | SLC1A2  |
| 3638.776 | 10.14577 | -7068 | 7.29E-05 | 470  | 0.333333 | 0.0061   | TMSB4Y  |
| 4109.576 | 7.897834 | -7068 | 7.37E-05 | 630  | 0.333333 | 0.009226 | MGST3   |
| 5576.133 | 11.26079 | -7068 | 7.32E-05 | 538  | 0.333333 | 0.00721  | MSI1    |
| 6721.079 | 7.269315 | -7068 | 7.46E-05 | 800  | 0.333333 | 0.011151 | DTYMK   |
| 5063.123 | 7.915721 | -7068 | 7.37E-05 | 667  | 0.333333 | 0.009652 | CLOCK   |
| 2721.21  | 7.355055 | -7068 | 7.32E-05 | 545  | 0.333333 | 0.008599 | MTMR1   |
| 5822.493 | 6.705646 | -7068 | 7.47E-05 | 832  | 0.333333 | 0.012461 | ALAD    |
| 8976.263 | 7.287389 | -7068 | 7.55E-05 | 979  | 0.333333 | 0.014688 | LRP8    |
| 2382.828 | 8.073703 | -7068 | 7.26E-05 | 428  | 0.333333 | 0.005196 | SURF1   |
| 13703.12 | 6.58958  | -7068 | 7.72E-05 | 1297 | 0.333333 | 0.019703 | TPD52L1 |
| 8380.813 | 6.686415 | -7068 | 7.57E-05 | 1005 | 0.333333 | 0.015452 | ADCY9   |
| 5759.028 | 6.505319 | -7068 | 7.47E-05 | 848  | 0.333333 | 0.012614 | LDHA    |
| 5914.708 | 8.482831 | -7068 | 7.41E-05 | 696  | 0.333333 | 0.009608 | CD5L    |
| 1086.226 | 11.39786 | -7068 | 7.16E-05 | 225  | 0.333333 | 0.002749 | FSCN2   |
| 3082.291 | 6.354626 | -7068 | 7.33E-05 | 595  | 0.333333 | 0.007618 | CYP3A4  |
| 4575.965 | 6.382525 | -7068 | 7.39E-05 | 729  | 0.333333 | 0.009442 | CYP1A2  |

|          |          |       |          |      |          |          |          |
|----------|----------|-------|----------|------|----------|----------|----------|
| 3109.775 | 6.358793 | -7068 | 7.35E-05 | 633  | 0.333333 | 0.009182 | EIF3F    |
| 3111.331 | 5.782804 | -7068 | 7.37E-05 | 663  | 0.333333 | 0.00957  | KHSRP    |
| 3370.49  | 6.529206 | -7068 | 7.37E-05 | 646  | 0.333333 | 0.00989  | PPP1R2   |
| 8164.914 | 7.773243 | -7068 | 7.50E-05 | 884  | 0.333333 | 0.012515 | GLDC     |
| 2950.159 | 6.089056 | -7068 | 7.32E-05 | 588  | 0.333333 | 0.007786 | MRPS18B  |
| 9127.007 | 5.905616 | -7068 | 7.61E-05 | 1141 | 0.333333 | 0.016322 | ENO1     |
| 7452.236 | 6.462137 | -7068 | 7.52E-05 | 960  | 0.333333 | 0.014646 | PLS3     |
| 3544.185 | 7.449739 | -7068 | 7.37E-05 | 613  | 0.333333 | 0.009485 | IER2     |
| 9520.796 | 7.635535 | -7068 | 7.56E-05 | 972  | 0.333333 | 0.014849 | WNT7A    |
| 7176.397 | 7.72686  | -7068 | 7.45E-05 | 805  | 0.333333 | 0.010665 | NAT2     |
| 3708.115 | 7.995091 | -7068 | 7.33E-05 | 561  | 0.333333 | 0.007688 | GJA4     |
| 5883.188 | 5.868386 | -7068 | 7.50E-05 | 903  | 0.333333 | 0.01331  | CKS1B    |
| 3341.017 | 9.369673 | -7068 | 7.28E-05 | 484  | 0.333333 | 0.006626 | HSPA1L   |
| 4135.935 | 8.464059 | -7068 | 7.35E-05 | 602  | 0.333333 | 0.008581 | GTF3A    |
| 6799.537 | 8.352674 | -7068 | 7.43E-05 | 749  | 0.333333 | 0.010848 | ASCL1    |
| 4729.758 | 6.862385 | -7068 | 7.43E-05 | 739  | 0.333333 | 0.011624 | NMT2     |
| 11513.32 | 6.605665 | -7068 | 7.61E-05 | 1132 | 0.333333 | 0.015858 | COL4A2   |
| 7689.427 | 6.997048 | -7068 | 7.52E-05 | 928  | 0.333333 | 0.013723 | PTPN21   |
| 6356.86  | 6.971846 | -7068 | 7.47E-05 | 836  | 0.333333 | 0.012289 | ADAM19   |
| 3656.341 | 8.015113 | -7068 | 7.34E-05 | 580  | 0.333333 | 0.008295 | IL17RA   |
| 5786.537 | 6.85486  | -7068 | 7.44E-05 | 792  | 0.333333 | 0.010628 | CYP4F2   |
| 6900.956 | 7.75182  | -7068 | 7.46E-05 | 814  | 0.333333 | 0.011664 | NECTIN2  |
| 7577.668 | 6.70414  | -7068 | 7.54E-05 | 966  | 0.333333 | 0.015029 | ETV5     |
| 4943.972 | 7.022527 | -7068 | 7.40E-05 | 717  | 0.333333 | 0.01023  | TLR1     |
| 6638.603 | 6.859354 | -7068 | 7.50E-05 | 876  | 0.333333 | 0.013473 | SLC25A24 |
| 7318.253 | 7.16894  | -7068 | 7.42E-05 | 828  | 0.333333 | 0.01011  | AMBP     |
| 19980.35 | 6.602454 | -7068 | 7.87E-05 | 1565 | 0.333333 | 0.023999 | RBMS1    |
| 4320.99  | 5.510558 | -7068 | 7.39E-05 | 750  | 0.333333 | 0.009152 | POLR2F   |
| 7877.247 | 7.348576 | -7068 | 7.51E-05 | 892  | 0.333333 | 0.012614 | NECTIN1  |
| 2618.043 | 9.458221 | -7068 | 7.25E-05 | 394  | 0.333333 | 0.004523 | GNAT1    |
| 22208.63 | 6.709225 | -7068 | 7.90E-05 | 1624 | 0.333333 | 0.024465 | NRG1     |
| 18042.51 | 5.78093  | -7068 | 7.82E-05 | 1578 | 0.333333 | 0.022439 | COL4A1   |
| 8139.874 | 6.730175 | -7068 | 7.54E-05 | 993  | 0.333333 | 0.014771 | PFKP     |
| 5839.99  | 6.80229  | -7068 | 7.44E-05 | 816  | 0.333333 | 0.010861 | PRKACA   |
| 7109.928 | 9.235995 | -7068 | 7.40E-05 | 696  | 0.333333 | 0.009444 | CCR4     |
| 3615.662 | 7.525969 | -7068 | 7.36E-05 | 608  | 0.333333 | 0.008842 | SIGMAR1  |
| 3871.239 | 6.309454 | -7068 | 7.38E-05 | 698  | 0.333333 | 0.010503 | DDR2     |
| 4625.766 | 7.099446 | -7068 | 7.41E-05 | 712  | 0.333333 | 0.010461 | MARK2    |
| 4686.927 | 7.953189 | -7068 | 7.37E-05 | 637  | 0.333333 | 0.008561 | GPD1     |
| 3512.793 | 7.782779 | -7068 | 7.35E-05 | 583  | 0.333333 | 0.008691 | ULK2     |
| 4292.167 | 6.791015 | -7068 | 7.41E-05 | 705  | 0.333333 | 0.010621 | SP100    |



|          |          |       |          |      |          |          |         |
|----------|----------|-------|----------|------|----------|----------|---------|
| 7966.484 | 7.571449 | -7068 | 7.51E-05 | 889  | 0.333333 | 0.013553 | SLC7A2  |
| 3046.87  | 7.594272 | -7068 | 7.32E-05 | 551  | 0.333333 | 0.00759  | IRF5    |
| 3142.643 | 8.955317 | -7068 | 7.30E-05 | 492  | 0.333333 | 0.006618 | P2RX1   |
| 5475.586 | 9.334278 | -7068 | 7.38E-05 | 629  | 0.333333 | 0.008848 | GRINA   |
| 4322.472 | 9.349447 | -7068 | 7.33E-05 | 549  | 0.333333 | 0.007703 | DRD3    |
| 4713.089 | 7.187441 | -7068 | 7.40E-05 | 705  | 0.333333 | 0.010761 | EDRF1   |
| 7200.765 | 5.929326 | -7068 | 7.50E-05 | 962  | 0.333333 | 0.013026 | POLR2D  |
| 7642.606 | 6.983144 | -7068 | 7.50E-05 | 905  | 0.333333 | 0.013078 | FAM107A |
| 10018.29 | 6.889361 | -7068 | 7.61E-05 | 1083 | 0.333333 | 0.016677 | HEBP2   |
| 3905.779 | 8.163828 | -7068 | 7.36E-05 | 595  | 0.333333 | 0.008669 | RANBP3  |
| 14666.9  | 7.089933 | -7068 | 7.70E-05 | 1269 | 0.333333 | 0.018521 | FGA     |
| 11646.03 | 6.408087 | -7068 | 7.69E-05 | 1228 | 0.333333 | 0.01966  | HACD2   |
| 1951.453 | 5.170885 | -7068 | 7.28E-05 | 541  | 0.333333 | 0.007457 | HNRNPDL |
| 7477.484 | 7.785453 | -7068 | 7.50E-05 | 865  | 0.333333 | 0.013395 | TOMM34  |
| 13864.81 | 6.491325 | -7068 | 7.74E-05 | 1332 | 0.333333 | 0.020418 | ERG     |
| 1322.616 | 6.712291 | -7068 | 7.20E-05 | 361  | 0.333333 | 0.004157 | MASP2   |
| 904.596  | 10.14826 | -7068 | 7.17E-05 | 238  | 0.333333 | 0.003311 | RBMXL2  |
| 3571.189 | 9.487981 | -7068 | 7.30E-05 | 484  | 0.333333 | 0.006301 | MUC3A   |
| 7207.436 | 7.800713 | -7068 | 7.46E-05 | 816  | 0.333333 | 0.011787 | DIO2    |
| 17326.65 | 7.226279 | -7068 | 7.77E-05 | 1357 | 0.333333 | 0.02057  | IL12A   |
| 8134.491 | 6.959059 | -7068 | 7.55E-05 | 963  | 0.333333 | 0.014801 | RAB30   |
| 8181.227 | 7.686116 | -7068 | 7.52E-05 | 910  | 0.333333 | 0.013771 | HLCS    |
| 11212.86 | 6.976637 | -7068 | 7.62E-05 | 1116 | 0.333333 | 0.016719 | PKP2    |
| 6161.219 | 6.70305  | -7068 | 7.46E-05 | 839  | 0.333333 | 0.01202  | GNG11   |
| 1903.22  | 7.224208 | -7068 | 7.27E-05 | 458  | 0.333333 | 0.006889 | NBR1    |
| 4350.714 | 6.231159 | -7068 | 7.42E-05 | 741  | 0.333333 | 0.011281 | CYBB    |
| 2481.011 | 8.283921 | -7068 | 7.29E-05 | 471  | 0.333333 | 0.006959 | TSPAN31 |
| 3731.261 | 7.635813 | -7068 | 7.34E-05 | 583  | 0.333333 | 0.007969 | ADGRE2  |
| 3227.576 | 6.779413 | -7068 | 7.36E-05 | 615  | 0.333333 | 0.008885 | ARPC4   |
| 11449.15 | 7.992173 | -7068 | 7.59E-05 | 1027 | 0.333333 | 0.015639 | USH2A   |
| 3678.367 | 5.437003 | -7068 | 7.38E-05 | 740  | 0.333333 | 0.009819 | JUNB    |
| 2538.35  | 7.384243 | -7068 | 7.31E-05 | 521  | 0.333333 | 0.007812 | EMC1    |
| 3864.413 | 9.489253 | -7068 | 7.32E-05 | 514  | 0.333333 | 0.007595 | FTO     |
| 4792.734 | 5.900578 | -7068 | 7.38E-05 | 757  | 0.333333 | 0.008805 | C2      |
| 7252.186 | 5.424015 | -7068 | 7.53E-05 | 1029 | 0.333333 | 0.014033 | TPX2    |
| 17373.98 | 6.789161 | -7068 | 7.64E-05 | 1227 | 0.333333 | 0.016803 | KIF2C   |
| 3212.658 | 6.829607 | -7068 | 7.37E-05 | 620  | 0.333333 | 0.010268 | TMX4    |
| 3587.648 | 8.089673 | -7068 | 7.33E-05 | 564  | 0.333333 | 0.007946 | COL9A3  |
| 7341.38  | 7.70048  | -7068 | 7.46E-05 | 812  | 0.333333 | 0.011178 | PI3     |
| 4099.95  | 6.770427 | -7068 | 7.37E-05 | 670  | 0.333333 | 0.008607 | NFKB2   |
| 11052.8  | 6.952788 | -7068 | 7.63E-05 | 1123 | 0.333333 | 0.017339 | KCNK1   |

|          |          |       |          |      |          |          |          |
|----------|----------|-------|----------|------|----------|----------|----------|
| 2639.684 | 7.210251 | -7068 | 7.30E-05 | 523  | 0.333333 | 0.00732  | SAFB     |
| 5918.823 | 7.610263 | -7068 | 7.43E-05 | 758  | 0.333333 | 0.010715 | TROAP    |
| 9665.848 | 6.979648 | -7068 | 7.57E-05 | 1040 | 0.333333 | 0.014878 | MTHFD1   |
| 16886.11 | 7.458345 | -7068 | 7.75E-05 | 1317 | 0.333333 | 0.020708 | LARGE1   |
| 12230.18 | 6.107694 | -7068 | 7.71E-05 | 1289 | 0.333333 | 0.020155 | HIPK1    |
| 4507.973 | 8.789843 | -7068 | 7.26E-05 | 501  | 0.25     | 0.005569 | ZNF33B   |
| 6018.94  | 5.995509 | -7068 | 7.45E-05 | 868  | 0.333333 | 0.01154  | MMP14    |
| 7032.236 | 7.716372 | -7068 | 7.46E-05 | 810  | 0.333333 | 0.011834 | SLC22A4  |
| 1083.584 | 7.703701 | -7068 | 7.20E-05 | 324  | 0.333333 | 0.004546 | EIF1AY   |
| 3898.422 | 6.258768 | -7068 | 7.37E-05 | 683  | 0.333333 | 0.008809 | CP       |
| 7200.195 | 7.033255 | -7068 | 7.49E-05 | 884  | 0.333333 | 0.013094 | ABI2     |
| 5308.955 | 7.009621 | -7068 | 7.41E-05 | 736  | 0.333333 | 0.009656 | LPA      |
| 7315.818 | 7.429575 | -7068 | 7.50E-05 | 864  | 0.333333 | 0.013208 | GPD2     |
| 13029.07 | 6.726202 | -7068 | 7.66E-05 | 1216 | 0.25     | 0.017564 | ENPP2    |
| 4439.226 | 6.976394 | -7068 | 7.39E-05 | 688  | 0.333333 | 0.009957 | LSM5     |
| 8647.921 | 5.784325 | -7068 | 7.55E-05 | 1098 | 0.333333 | 0.014617 | SMAD3    |
| 4150.115 | 7.053479 | -7068 | 7.39E-05 | 674  | 0.333333 | 0.01018  | YTHDC1   |
| 2509.376 | 7.203489 | -7068 | 7.30E-05 | 508  | 0.333333 | 0.007953 | SNX4     |
| 3972.312 | 6.851397 | -7068 | 7.40E-05 | 685  | 0.333333 | 0.010937 | KDM3A    |
| 13239.52 | 6.337782 | -7068 | 7.72E-05 | 1313 | 0.333333 | 0.020286 | SPTBN1   |
| 2960.097 | 8.444536 | -7068 | 7.30E-05 | 498  | 0.333333 | 0.007283 | SARM1    |
| 17906.25 | 7.406997 | -7068 | 7.77E-05 | 1355 | 0.333333 | 0.020992 | SRGAP3   |
| 3108.306 | 9.786202 | -7068 | 7.27E-05 | 437  | 0.333333 | 0.005948 | SULT4A1  |
| 5781.963 | 6.032543 | -7068 | 7.42E-05 | 824  | 0.333333 | 0.010343 | HLA-F    |
| 5644.579 | 7.364453 | -7068 | 7.45E-05 | 778  | 0.333333 | 0.011785 | CYB561   |
| 8626.183 | 6.866557 | -7068 | 7.54E-05 | 995  | 0.333333 | 0.014676 | PIK3R3   |
| 2725.634 | 8.138545 | -7068 | 7.29E-05 | 488  | 0.333333 | 0.006677 | CORO2A   |
| 4901.805 | 12.1258  | -7068 | 7.28E-05 | 449  | 0.333333 | 0.005367 | CNTF     |
| 17384.01 | 7.316941 | -7068 | 7.74E-05 | 1336 | 0.333333 | 0.01908  | DHRS3    |
| 14192.44 | 5.873813 | -7068 | 7.63E-05 | 1357 | 0.333333 | 0.01618  | SRC      |
| 4405.906 | 9.139777 | -7068 | 7.34E-05 | 559  | 0.333333 | 0.007808 | TGM5     |
| 4574.393 | 9.693535 | -7068 | 7.32E-05 | 538  | 0.333333 | 0.007402 | ARNT2    |
| 4262.05  | 7.700433 | -7068 | 7.39E-05 | 654  | 0.333333 | 0.0099   | NFATC2IP |
| 9956.863 | 7.0236   | -7068 | 7.55E-05 | 1039 | 0.333333 | 0.014107 | PML      |
| 3678.074 | 8.930725 | -7068 | 7.30E-05 | 517  | 0.333333 | 0.006669 | NFKBIB   |
| 9976.276 | 7.033314 | -7068 | 7.60E-05 | 1063 | 0.333333 | 0.016108 | POLD3    |
| 2743.419 | 7.031785 | -7068 | 7.32E-05 | 552  | 0.333333 | 0.008309 | ZFYVE9   |
| 3325.4   | 8.846681 | -7068 | 7.30E-05 | 504  | 0.333333 | 0.006503 | DNPH1    |
| 6140.833 | 7.278477 | -7068 | 7.46E-05 | 799  | 0.333333 | 0.011557 | MMP19    |
| 5148.688 | 4.617238 | -7068 | 7.47E-05 | 960  | 0.333333 | 0.012868 | COL3A1   |
| 2447.262 | 8.209303 | -7068 | 7.28E-05 | 467  | 0.333333 | 0.00685  | WIPI1    |

|          |          |       |          |      |          |          |          |
|----------|----------|-------|----------|------|----------|----------|----------|
| 5775.738 | 7.625041 | -7068 | 7.43E-05 | 743  | 0.333333 | 0.010957 | FKBP9    |
| 6453.793 | 6.863471 | -7068 | 7.48E-05 | 853  | 0.333333 | 0.012479 | IER3     |
| 4007.446 | 8.333733 | -7068 | 7.35E-05 | 577  | 0.333333 | 0.008187 | REG1A    |
| 5033.028 | 7.35178  | -7068 | 7.42E-05 | 731  | 0.333333 | 0.011101 | ZNF207   |
| 7348.143 | 7.608636 | -7068 | 7.48E-05 | 838  | 0.333333 | 0.012164 | ELF3     |
| 5158.968 | 6.582746 | -7068 | 7.45E-05 | 805  | 0.333333 | 0.012063 | YBX3     |
| 10633.74 | 8.320031 | -7068 | 7.55E-05 | 968  | 0.333333 | 0.014448 | RAB32    |
| 11700.25 | 6.673167 | -7068 | 7.68E-05 | 1201 | 0.333333 | 0.018556 | CTSH     |
| 5102.945 | 7.516952 | -7068 | 7.37E-05 | 672  | 0.333333 | 0.008515 | SLPI     |
| 13804.1  | 6.823181 | -7068 | 7.70E-05 | 1265 | 0.333333 | 0.018596 | SCARB1   |
| 4833.603 | 8.21495  | -7068 | 7.31E-05 | 574  | 0.333333 | 0.006385 | NDUFA2   |
| 15255.64 | 6.907127 | -7068 | 7.71E-05 | 1312 | 0.333333 | 0.019153 | HADH     |
| 3351.356 | 5.295166 | -7068 | 7.37E-05 | 705  | 0.333333 | 0.009269 | PSMD13   |
| 6936.56  | 6.77587  | -7068 | 7.52E-05 | 911  | 0.333333 | 0.014255 | CSRP2    |
| 6945.096 | 6.59933  | -7068 | 7.52E-05 | 934  | 0.333333 | 0.014396 | MAP4     |
| 8406.808 | 5.374204 | -7068 | 7.58E-05 | 1133 | 0.333333 | 0.01619  | RPL13    |
| 13458.29 | 6.876321 | -7068 | 7.72E-05 | 1259 | 0.333333 | 0.019811 | TP53I11  |
| 10929.03 | 7.502318 | -7068 | 7.58E-05 | 1041 | 0.333333 | 0.015112 | WNT4     |
| 6447.974 | 6.59874  | -7068 | 7.51E-05 | 895  | 0.333333 | 0.014069 | PDK3     |
| 5225.138 | 5.252686 | -7068 | 7.45E-05 | 886  | 0.333333 | 0.011832 | ACTA2    |
| 6796.844 | 6.294931 | -7068 | 7.48E-05 | 909  | 0.333333 | 0.012766 | NOV      |
| 7669.951 | 5.718821 | -7068 | 7.54E-05 | 1049 | 0.333333 | 0.014679 | LAMA3    |
| 4921.431 | 7.081823 | -7068 | 7.40E-05 | 711  | 0.333333 | 0.009826 | ACKR1    |
| 4480.785 | 6.527696 | -7068 | 7.41E-05 | 738  | 0.333333 | 0.0103   | IVD      |
| 6207.194 | 9.256168 | -7068 | 7.36E-05 | 645  | 0.333333 | 0.00833  | NKX3-1   |
| 11957.71 | 7.186761 | -7068 | 7.61E-05 | 1125 | 0.333333 | 0.016057 | KLF4     |
| 10194.18 | 8.341886 | -7068 | 7.53E-05 | 925  | 0.333333 | 0.013443 | SCEL     |
| 2295.597 | 9.15037  | -7068 | 7.25E-05 | 402  | 0.333333 | 0.005607 | UPK1B    |
| 9533.775 | 9.396839 | -7068 | 7.45E-05 | 788  | 0.333333 | 0.010176 | PPL      |
| 2714.889 | 10.49666 | -7068 | 7.26E-05 | 404  | 0.333333 | 0.00524  | TOP3B    |
| 5128.427 | 5.889848 | -7068 | 7.44E-05 | 834  | 0.333333 | 0.011386 | LRP1     |
| 18025.04 | 6.686494 | -7068 | 7.84E-05 | 1480 | 0.333333 | 0.023319 | SYNE1    |
| 2876.517 | 6.366521 | -7068 | 7.35E-05 | 617  | 0.333333 | 0.009577 | ADAM17   |
| 1748.934 | 6.823379 | -7068 | 7.26E-05 | 440  | 0.333333 | 0.006631 | ATG12    |
| 5388.532 | 6.824189 | -7068 | 7.43E-05 | 780  | 0.333333 | 0.011114 | RARB     |
| 7239.475 | 6.813042 | -7068 | 7.46E-05 | 871  | 0.333333 | 0.011277 | UQCR11   |
| 4520.029 | 8.745477 | -7068 | 7.34E-05 | 585  | 0.333333 | 0.008646 | CLCN5    |
| 7811.614 | 7.591834 | -7068 | 7.52E-05 | 887  | 0.333333 | 0.013811 | ATP9B    |
| 6293.493 | 8.252176 | -7068 | 7.38E-05 | 704  | 0.333333 | 0.009134 | MMP8     |
| 4706.993 | 7.971556 | -7068 | 7.36E-05 | 624  | 0.333333 | 0.008048 | MRPS12   |
| 3840.735 | 8.078849 | -7068 | 7.36E-05 | 595  | 0.333333 | 0.008907 | C1orf216 |

|          |          |       |          |      |          |          |         |
|----------|----------|-------|----------|------|----------|----------|---------|
| 6544.261 | 6.716692 | -7068 | 7.49E-05 | 878  | 0.333333 | 0.012797 | GAS2    |
| 4879.844 | 6.335524 | -7068 | 7.45E-05 | 799  | 0.333333 | 0.012387 | ANGPT1  |
| 5326.547 | 6.975446 | -7068 | 7.44E-05 | 778  | 0.333333 | 0.011723 | BST2    |
| 8787.162 | 6.727218 | -7068 | 7.58E-05 | 1035 | 0.333333 | 0.016165 | MTSS1   |
| 4391.515 | 6.679923 | -7068 | 7.43E-05 | 735  | 0.333333 | 0.011732 | DAZAP2  |
| 6124.124 | 7.137646 | -7068 | 7.47E-05 | 819  | 0.333333 | 0.012514 | GPM6B   |
| 7771.691 | 6.945671 | -7068 | 7.55E-05 | 955  | 0.333333 | 0.01539  | MDM1    |
| 3722.487 | 9.649459 | -7068 | 7.28E-05 | 481  | 0.333333 | 0.006124 | CCL22   |
| 4605.635 | 6.282124 | -7068 | 7.42E-05 | 763  | 0.333333 | 0.011121 | IL13RA1 |
| 4545.623 | 7.756024 | -7068 | 7.36E-05 | 632  | 0.333333 | 0.008593 | PPBP    |
| 5799.392 | 6.42058  | -7068 | 7.48E-05 | 855  | 0.333333 | 0.01319  | TIMM17A |
| 7606.954 | 5.354335 | -7068 | 7.56E-05 | 1093 | 0.333333 | 0.015262 | FH      |
| 12911.82 | 7.819899 | -7068 | 7.62E-05 | 1093 | 0.333333 | 0.016617 | TRPM1   |
| 3135.905 | 7.653397 | -7068 | 7.33E-05 | 553  | 0.333333 | 0.007558 | AP2A2   |
| 5883.879 | 5.899825 | -7068 | 7.48E-05 | 901  | 0.333333 | 0.012778 | ILF3    |
| 8877.909 | 7.308833 | -7068 | 7.54E-05 | 963  | 0.333333 | 0.01451  | ITGA9   |
| 2887.814 | 7.548438 | -7068 | 7.32E-05 | 540  | 0.333333 | 0.008093 | DBN1    |
| 15220.84 | 6.860322 | -7068 | 7.74E-05 | 1319 | 0.333333 | 0.019929 | SLC4A4  |
| 2234.429 | 9.831919 | -7068 | 7.25E-05 | 391  | 0.333333 | 0.005353 | CHRNB1  |
| 7663.103 | 6.795014 | -7068 | 7.54E-05 | 958  | 0.333333 | 0.014726 | ERCC4   |
| 3919.433 | 5.112538 | -7068 | 7.41E-05 | 803  | 0.333333 | 0.010763 | PSMB2   |
| 4801.11  | 7.649285 | -7068 | 7.38E-05 | 685  | 0.333333 | 0.009217 | MAPK12  |
| 13158.11 | 6.819792 | -7068 | 7.69E-05 | 1234 | 0.333333 | 0.018925 | DLGAP1  |
| 7208.511 | 6.54954  | -7068 | 7.48E-05 | 904  | 0.333333 | 0.01175  | APOE    |
| 1457.004 | 6.940028 | -7068 | 7.25E-05 | 405  | 0.333333 | 0.006249 | ZNF24   |
| 3895.504 | 10.92494 | -7068 | 7.28E-05 | 439  | 0.333333 | 0.005473 | IL17A   |
| 5748.3   | 7.377406 | -7068 | 7.44E-05 | 763  | 0.333333 | 0.011596 | PDE8B   |
| 6620.031 | 6.343825 | -7068 | 7.45E-05 | 866  | 0.333333 | 0.011969 | CYCS    |
| 5552.31  | 8.418785 | -7068 | 7.40E-05 | 684  | 0.333333 | 0.009752 | AQP3    |
| 5112.19  | 7.667634 | -7068 | 7.41E-05 | 692  | 0.333333 | 0.010479 | SYT11   |
| 6737.833 | 7.608603 | -7068 | 7.46E-05 | 808  | 0.333333 | 0.011258 | HYAL1   |
| 4517.63  | 6.875618 | -7068 | 7.39E-05 | 698  | 0.333333 | 0.00959  | CCL13   |
| 6700.294 | 6.177226 | -7068 | 7.47E-05 | 888  | 0.333333 | 0.011199 | CFI     |
| 5625.945 | 7.306481 | -7068 | 7.44E-05 | 765  | 0.25     | 0.011747 | ABCA6   |
| 16451.37 | 6.340227 | -7068 | 7.77E-05 | 1437 | 0.333333 | 0.021153 | NEDD9   |
| 5655.977 | 6.09637  | -7068 | 7.47E-05 | 871  | 0.333333 | 0.012872 | HSPA4   |
| 3514.839 | 6.821249 | -7068 | 7.36E-05 | 638  | 0.333333 | 0.009451 | MSH3    |
| 8386.132 | 7.425912 | -7068 | 7.49E-05 | 893  | 0.333333 | 0.01166  | PEBP1   |
| 8793.887 | 6.600362 | -7068 | 7.57E-05 | 1039 | 0.333333 | 0.015719 | BTRC    |
| 6276.541 | 6.390242 | -7068 | 7.46E-05 | 865  | 0.25     | 0.012515 | FSTL1   |
| 6181.682 | 7.715767 | -7068 | 7.46E-05 | 789  | 0.333333 | 0.011672 | DHCR24  |

|          |          |       |          |      |          |          |           |
|----------|----------|-------|----------|------|----------|----------|-----------|
| 2687.837 | 8.811845 | -7068 | 7.28E-05 | 455  | 0.333333 | 0.006075 | FOXO4     |
| 10307.56 | 7.405899 | -7068 | 7.56E-05 | 1016 | 0.333333 | 0.014745 | TLR3      |
| 2470.794 | 7.469646 | -7068 | 7.31E-05 | 513  | 0.333333 | 0.007928 | ZBTB1     |
| 5787.319 | 7.658583 | -7068 | 7.41E-05 | 731  | 0.333333 | 0.009561 | PKMYT1    |
| 6042.208 | 8.711563 | -7068 | 7.41E-05 | 698  | 0.333333 | 0.009902 | LRP5      |
| 4887.494 | 8.099212 | -7068 | 7.39E-05 | 667  | 0.333333 | 0.009785 | LRP6      |
| 6915.268 | 7.702721 | -7068 | 7.46E-05 | 818  | 0.333333 | 0.011994 | HHEX      |
| 3782.253 | 6.011303 | -7068 | 7.38E-05 | 689  | 0.333333 | 0.009186 | CCL4      |
| 5285.644 | 6.500193 | -7068 | 7.45E-05 | 810  | 0.333333 | 0.011893 | ANXA11    |
| 9733.991 | 6.607423 | -7068 | 7.61E-05 | 1105 | 0.333333 | 0.016945 | INSIG1    |
| 4236.014 | 8.738609 | -7068 | 7.35E-05 | 582  | 0.333333 | 0.0082   | APOBEC3C  |
| 3051.244 | 7.627069 | -7068 | 7.33E-05 | 550  | 0.333333 | 0.008164 | SFXN3     |
| 16431.44 | 7.090202 | -7068 | 7.75E-05 | 1338 | 0.333333 | 0.020436 | CTDSPL    |
| 5434.708 | 5.770038 | -7068 | 7.44E-05 | 865  | 0.333333 | 0.011011 | POLA2     |
| 9382.007 | 7.268163 | -7068 | 7.56E-05 | 991  | 0.333333 | 0.014659 | ENPEP     |
| 10848.49 | 6.466318 | -7068 | 7.64E-05 | 1186 | 0.333333 | 0.018313 | CBX5      |
| 10557.11 | 6.831374 | -7068 | 7.61E-05 | 1105 | 0.333333 | 0.016108 | ACSL1     |
| 4275.211 | 7.665438 | -7068 | 7.39E-05 | 654  | 0.333333 | 0.009732 | COA1      |
| 4057.637 | 7.05692  | -7068 | 7.38E-05 | 662  | 0.333333 | 0.009781 | PRKAA1    |
| 5470.07  | 6.350475 | -7068 | 7.43E-05 | 801  | 0.333333 | 0.010285 | SDHA      |
| 8843.891 | 6.151813 | -7068 | 7.57E-05 | 1066 | 0.333333 | 0.015519 | VCAN      |
| 4614.213 | 7.758635 | -7068 | 7.39E-05 | 670  | 0.333333 | 0.009631 | NQO1      |
| 7003.219 | 6.230107 | -7068 | 7.52E-05 | 958  | 0.333333 | 0.014343 | PTPRB     |
| 3034.287 | 8.131759 | -7068 | 7.30E-05 | 505  | 0.333333 | 0.006802 | CNGB1     |
| 5015.962 | 5.10775  | -7068 | 7.47E-05 | 894  | 0.333333 | 0.012582 | SMC4      |
| 3892.921 | 8.061332 | -7068 | 7.35E-05 | 590  | 0.333333 | 0.008376 | PYCR1     |
| 6560.808 | 5.448123 | -7068 | 7.52E-05 | 1002 | 0.333333 | 0.014135 | BUB3      |
| 4698.695 | 6.294538 | -7068 | 7.46E-05 | 802  | 0.333333 | 0.013178 | MAPK1IP1L |
| 9553.867 | 7.285029 | -7068 | 7.55E-05 | 991  | 0.333333 | 0.014431 | LGALS3    |
| 7337.224 | 8.476657 | -7068 | 7.46E-05 | 773  | 0.333333 | 0.012077 | ABTB2     |
| 2302.582 | 7.179845 | -7068 | 7.30E-05 | 491  | 0.333333 | 0.007625 | NXT2      |
| 7961.866 | 7.848911 | -7068 | 7.50E-05 | 870  | 0.333333 | 0.013231 | LPCAT3    |
| 8722.122 | 6.377379 | -7068 | 7.55E-05 | 1036 | 0.333333 | 0.014268 | GOT1      |
| 6315.862 | 7.158699 | -7068 | 7.43E-05 | 806  | 0.333333 | 0.010315 | F12       |
| 10469.76 | 6.498525 | -7068 | 7.63E-05 | 1141 | 0.333333 | 0.01765  | MOXD1     |
| 6069.451 | 6.837076 | -7068 | 7.47E-05 | 834  | 0.333333 | 0.012167 | TMBIM6    |
| 6563.731 | 7.866572 | -7068 | 7.44E-05 | 768  | 0.333333 | 0.011343 | SIX1      |
| 3613.639 | 6.587323 | -7068 | 7.34E-05 | 637  | 0.333333 | 0.008265 | TRADD     |
| 5619.756 | 8.570333 | -7068 | 7.39E-05 | 663  | 0.333333 | 0.009037 | CRTC1     |
| 7377.257 | 6.919836 | -7068 | 7.51E-05 | 916  | 0.333333 | 0.01377  | MYO5A     |
| 4788.904 | 6.182081 | -7068 | 7.44E-05 | 795  | 0.333333 | 0.011716 | UBE2L3    |

|          |          |       |          |      |          |          |         |
|----------|----------|-------|----------|------|----------|----------|---------|
| 7991.409 | 6.114777 | -7068 | 7.57E-05 | 1042 | 0.333333 | 0.015886 | ATP6V1H |
| 5672.421 | 9.203996 | -7068 | 7.37E-05 | 630  | 0.333333 | 0.008379 | OVOL2   |
| 2709.607 | 8.165259 | -7068 | 7.31E-05 | 506  | 0.333333 | 0.007556 | SGPL1   |
| 19821.58 | 7.039847 | -7068 | 7.83E-05 | 1481 | 0.333333 | 0.022589 | GALNT10 |
| 5773.528 | 7.030398 | -7068 | 7.44E-05 | 784  | 0.333333 | 0.011213 | LTF     |
| 5622     | 8.47614  | -7068 | 7.39E-05 | 672  | 0.333333 | 0.009486 | INHHA   |
| 2553.381 | 8.5529   | -7068 | 7.28E-05 | 457  | 0.333333 | 0.006672 | RAB40B  |
| 3356.351 | 7.659331 | -7068 | 7.31E-05 | 528  | 0.333333 | 0.006541 | S100A7  |
| 4126.666 | 6.733503 | -7068 | 7.39E-05 | 677  | 0.333333 | 0.009666 | MRPS11  |
| 3473.524 | 8.128232 | -7068 | 7.32E-05 | 547  | 0.333333 | 0.007235 | ATOX1   |
| 9082.365 | 7.499268 | -7068 | 7.54E-05 | 967  | 0.333333 | 0.014534 | POLDIP3 |
| 8462.464 | 7.066334 | -7068 | 7.54E-05 | 969  | 0.333333 | 0.014267 | KMO     |
| 5477.74  | 8.240214 | -7068 | 7.40E-05 | 692  | 0.333333 | 0.010004 | SPINK1  |
| 5439.422 | 7.324417 | -7068 | 7.44E-05 | 757  | 0.333333 | 0.011708 | ERP44   |
| 2072.288 | 8.741436 | -7068 | 7.21E-05 | 358  | 0.333333 | 0.004079 | CRX     |
| 3184.159 | 7.419427 | -7068 | 7.32E-05 | 557  | 0.333333 | 0.007734 | ELN     |
| 14505.47 | 7.965891 | -7068 | 7.57E-05 | 1091 | 0.333333 | 0.014279 | NDUFV2  |
| 6050.867 | 6.656932 | -7068 | 7.47E-05 | 834  | 0.333333 | 0.012269 | SLC2A3  |
| 6591.145 | 8.019543 | -7068 | 7.45E-05 | 783  | 0.333333 | 0.01191  | LPIN2   |
| 7733.279 | 8.874912 | -7068 | 7.44E-05 | 760  | 0.333333 | 0.010412 | CEL     |
| 7595.203 | 7.668046 | -7068 | 7.48E-05 | 848  | 0.333333 | 0.012122 | PTAFR   |
| 5856.013 | 6.908592 | -7068 | 7.48E-05 | 827  | 0.333333 | 0.013111 | DIP2C   |
| 4550.062 | 6.978337 | -7068 | 7.42E-05 | 731  | 0.333333 | 0.010982 | ST6GAL1 |
| 6853.101 | 6.679818 | -7068 | 7.47E-05 | 871  | 0.333333 | 0.011469 | CRP     |
| 5176.654 | 8.389856 | -7068 | 7.39E-05 | 660  | 0.333333 | 0.009704 | ABCA12  |
| 2659.522 | 9.725112 | -7068 | 7.26E-05 | 410  | 0.333333 | 0.00541  | GNAT2   |
| 2340.448 | 6.242967 | -7068 | 7.31E-05 | 542  | 0.333333 | 0.008127 | CEP57   |
| 5077.604 | 7.576556 | -7068 | 7.41E-05 | 700  | 0.333333 | 0.010472 | MXRA5   |
| 4282.749 | 8.247522 | -7068 | 7.35E-05 | 585  | 0.333333 | 0.007381 | TECR    |
| 3429.447 | 6.679327 | -7068 | 7.36E-05 | 641  | 0.333333 | 0.009668 | TGIF1   |
| 7654.538 | 7.694188 | -7068 | 7.49E-05 | 855  | 0.333333 | 0.012316 | ADGRG1  |
| 9714.583 | 6.47246  | -7068 | 7.62E-05 | 1104 | 0.333333 | 0.016934 | ZFAND5  |
| 6568.353 | 6.218536 | -7068 | 7.51E-05 | 931  | 0.333333 | 0.013851 | ETS2    |
| 8270.894 | 7.800672 | -7068 | 7.48E-05 | 857  | 0.333333 | 0.011995 | LIN7A   |
| 6128.145 | 8.033473 | -7068 | 7.38E-05 | 686  | 0.333333 | 0.008935 | NDUFS6  |
| 5465.425 | 12.86956 | -7068 | 7.27E-05 | 425  | 0.333333 | 0.004474 | P2RX3   |
| 3098.107 | 6.156287 | -7068 | 7.36E-05 | 655  | 0.333333 | 0.009981 | GRB10   |
| 3849.845 | 6.511774 | -7068 | 7.40E-05 | 698  | 0.333333 | 0.011301 | RTF1    |
| 2048.963 | 6.582848 | -7068 | 7.29E-05 | 496  | 0.333333 | 0.00758  | DNAJB4  |
| 4180.063 | 7.373282 | -7068 | 7.38E-05 | 658  | 0.333333 | 0.009572 | CSF1    |
| 4752.989 | 7.886278 | -7068 | 7.37E-05 | 649  | 0.333333 | 0.008583 | CSTB    |

|          |          |       |          |      |          |          |          |
|----------|----------|-------|----------|------|----------|----------|----------|
| 7473.793 | 7.061784 | -7068 | 7.52E-05 | 908  | 0.333333 | 0.013969 | PLEKHA6  |
| 4986.318 | 5.54074  | -7068 | 7.45E-05 | 844  | 0.333333 | 0.011673 | HMMR     |
| 7111.996 | 5.806287 | -7068 | 7.54E-05 | 1015 | 0.333333 | 0.014812 | SMARCA4  |
| 5591.575 | 6.739116 | -7068 | 7.47E-05 | 823  | 0.333333 | 0.012809 | AHCYL1   |
| 3855.677 | 7.797082 | -7068 | 7.30E-05 | 550  | 0.333333 | 0.006477 | APOM     |
| 3437.421 | 6.923066 | -7068 | 7.36E-05 | 623  | 0.333333 | 0.009643 | ABCA1    |
| 2707.062 | 10.21737 | -7068 | 7.24E-05 | 392  | 0.333333 | 0.005404 | GPR161   |
| 23880.64 | 6.638367 | -7068 | 7.94E-05 | 1693 | 0.333333 | 0.025319 | SLC7A11  |
| 3830.275 | 6.170721 | -7068 | 7.38E-05 | 710  | 0.333333 | 0.01041  | YY1      |
| 16260.82 | 6.121325 | -7068 | 7.78E-05 | 1484 | 0.333333 | 0.021838 | XRCC5    |
| 4101.54  | 6.904339 | -7068 | 7.39E-05 | 687  | 0.333333 | 0.010104 | PLIN2    |
| 5850.405 | 6.978048 | -7068 | 7.45E-05 | 799  | 0.333333 | 0.011852 | PARP2    |
| 13842.29 | 7.046658 | -7068 | 7.66E-05 | 1217 | 0.333333 | 0.018053 | HES1     |
| 12133.44 | 7.868852 | -7068 | 7.59E-05 | 1058 | 0.333333 | 0.015178 | BDH1     |
| 3040.112 | 7.815433 | -7068 | 7.31E-05 | 531  | 0.333333 | 0.007732 | BECN1    |
| 1494.034 | 8.106812 | -7068 | 7.22E-05 | 361  | 0.333333 | 0.004946 | NAIP     |
| 4658.097 | 8.027925 | -7068 | 7.38E-05 | 653  | 0.333333 | 0.009388 | CHMP7    |
| 6002.881 | 6.882325 | -7068 | 7.43E-05 | 796  | 0.333333 | 0.011369 | KL       |
| 13764.88 | 7.458806 | -7068 | 7.63E-05 | 1163 | 0.333333 | 0.016757 | SERPINH1 |
| 4238.498 | 9.569827 | -7068 | 7.32E-05 | 508  | 0.333333 | 0.0062   | GAST     |
| 9102.818 | 6.07448  | -7068 | 7.59E-05 | 1100 | 0.333333 | 0.01604  | NAMPT    |
| 2645.089 | 7.193875 | -7068 | 7.30E-05 | 523  | 0.333333 | 0.007667 | DSTN     |
| 5082.367 | 7.623838 | -7068 | 7.41E-05 | 701  | 0.333333 | 0.009947 | ACOT7    |
| 2944.107 | 9.342242 | -7068 | 7.28E-05 | 456  | 0.333333 | 0.006208 | HR       |
| 2415.145 | 7.829551 | -7068 | 7.27E-05 | 466  | 0.333333 | 0.006141 | CTDP1    |
| 8783.926 | 7.453396 | -7068 | 7.54E-05 | 942  | 0.333333 | 0.014464 | ZNF711   |
| 3031.493 | 8.276397 | -7068 | 7.29E-05 | 475  | 0.333333 | 0.005962 | KRT4     |
| 4617.025 | 8.006102 | -7068 | 7.37E-05 | 642  | 0.333333 | 0.008813 | LY6E     |
| 4915.91  | 7.235363 | -7068 | 7.41E-05 | 723  | 0.333333 | 0.010593 | P4HA1    |
| 2691.427 | 7.898681 | -7068 | 7.28E-05 | 480  | 0.333333 | 0.006097 | THPO     |
| 6564.375 | 8.82298  | -7068 | 7.41E-05 | 712  | 0.333333 | 0.010811 | KCTD20   |
| 7871.222 | 5.009965 | -7068 | 7.53E-05 | 1107 | 0.333333 | 0.013984 | SMC2     |
| 3757.165 | 6.920065 | -7068 | 7.38E-05 | 654  | 0.25     | 0.010117 | ADAMTS3  |
| 9057.48  | 7.052708 | -7068 | 7.57E-05 | 1009 | 0.333333 | 0.015993 | PANX1    |
| 5443.301 | 8.861871 | -7068 | 7.39E-05 | 654  | 0.333333 | 0.009491 | SBNO2    |
| 42695.56 | 7.112076 | -7068 | 8.26E-05 | 2153 | 0.333333 | 0.032829 | KCNIP4   |
| 6209.588 | 6.400736 | -7068 | 7.48E-05 | 880  | 0.333333 | 0.012787 | FOSL2    |
| 4320.088 | 8.7491   | -7068 | 7.36E-05 | 596  | 0.333333 | 0.00849  | MICB     |
| 10705.81 | 7.648916 | -7068 | 7.58E-05 | 1039 | 0.333333 | 0.015693 | IDI1     |
| 11149.35 | 6.942231 | -7068 | 7.61E-05 | 1109 | 0.333333 | 0.015747 | CYB5A    |
| 16537.33 | 7.185328 | -7068 | 7.71E-05 | 1304 | 0.333333 | 0.018932 | COX5A    |

|          |          |       |          |      |          |          |          |
|----------|----------|-------|----------|------|----------|----------|----------|
| 8199.903 | 6.702928 | -7068 | 7.56E-05 | 1000 | 0.333333 | 0.015492 | PPID     |
| 8213.554 | 5.637526 | -7068 | 7.57E-05 | 1101 | 0.333333 | 0.015497 | ITGB3    |
| 3152.64  | 7.29956  | -7068 | 7.32E-05 | 576  | 0.333333 | 0.008084 | TAF15    |
| 5086.981 | 9.379036 | -7068 | 7.34E-05 | 580  | 0.333333 | 0.007614 | GLI1     |
| 4295.787 | 8.242656 | -7068 | 7.36E-05 | 606  | 0.333333 | 0.008376 | CTSV     |
| 1575.77  | 7.453442 | -7068 | 7.23E-05 | 386  | 0.333333 | 0.00514  | NCAM1    |
| 3770.79  | 6.960263 | -7068 | 7.37E-05 | 652  | 0.333333 | 0.009717 | SLC25A40 |
| 4364.658 | 7.431143 | -7068 | 7.38E-05 | 662  | 0.333333 | 0.008984 | DHCR7    |
| 9882.02  | 7.178415 | -7068 | 7.59E-05 | 1042 | 0.333333 | 0.015737 | AGTR1    |
| 5177.759 | 7.328442 | -7068 | 7.42E-05 | 732  | 0.333333 | 0.010907 | MAP2     |
| 1980.258 | 8.403425 | -7068 | 7.24E-05 | 378  | 0.333333 | 0.00448  | MMP24    |
| 2660.467 | 9.410972 | -7068 | 7.26E-05 | 423  | 0.333333 | 0.005612 | SIX3     |
| 5190.468 | 7.525014 | -7068 | 7.41E-05 | 719  | 0.333333 | 0.010958 | NOVA1    |
| 4870.871 | 7.491027 | -7068 | 7.40E-05 | 704  | 0.333333 | 0.010571 | STX2     |
| 4453.24  | 7.886342 | -7068 | 7.38E-05 | 652  | 0.333333 | 0.009551 | HK2      |
| 4116.971 | 9.70686  | -7068 | 7.32E-05 | 526  | 0.333333 | 0.00708  | TNFSF9   |
| 11486.74 | 8.634412 | -7068 | 7.57E-05 | 986  | 0.333333 | 0.014564 | NMU      |
| 6537.549 | 5.379205 | -7068 | 7.52E-05 | 1009 | 0.333333 | 0.014195 | VDAC1    |
| 6076.477 | 7.011962 | -7068 | 7.46E-05 | 820  | 0.333333 | 0.012252 | MFGE8    |
| 3436.828 | 11.32293 | -7068 | 7.24E-05 | 394  | 0.333333 | 0.004754 | IFNA2    |
| 5210.682 | 7.172946 | -7068 | 7.43E-05 | 757  | 0.333333 | 0.01141  | NFE2L3   |
| 2355.474 | 9.504293 | -7068 | 7.25E-05 | 405  | 0.333333 | 0.005234 | RENBP    |
| 9419.316 | 6.482937 | -7068 | 7.61E-05 | 1086 | 0.333333 | 0.016733 | DNAJC9   |
| 9376.302 | 6.43152  | -7068 | 7.60E-05 | 1089 | 0.333333 | 0.016231 | TLE1     |
| 5525.28  | 6.729591 | -7068 | 7.39E-05 | 746  | 0.333333 | 0.008809 | CFB      |
| 4592.068 | 7.166736 | -7068 | 7.39E-05 | 693  | 0.333333 | 0.009996 | RGS16    |
| 2757.342 | 5.417042 | -7068 | 7.34E-05 | 630  | 0.25     | 0.008756 | MFAP5    |
| 4140.434 | 6.017615 | -7068 | 7.41E-05 | 734  | 0.333333 | 0.010935 | HTATSF1  |
| 2860.588 | 7.502524 | -7068 | 7.31E-05 | 531  | 0.333333 | 0.008093 | GRM8     |
| 2039.75  | 5.777424 | -7068 | 7.30E-05 | 526  | 0.333333 | 0.00768  | GHITM    |
| 3503.307 | 6.282882 | -7068 | 7.38E-05 | 667  | 0.333333 | 0.009717 | CAPZB    |
| 4726.768 | 6.656782 | -7068 | 7.41E-05 | 745  | 0.333333 | 0.010498 | NOTCH3   |
| 3407.344 | 6.066297 | -7068 | 7.35E-05 | 669  | 0.333333 | 0.009069 | ETS1     |
| 4076.71  | 6.466223 | -7068 | 7.37E-05 | 676  | 0.333333 | 0.009218 | TAF5     |
| 14836.27 | 6.489612 | -7068 | 7.73E-05 | 1349 | 0.333333 | 0.019989 | RET      |
| 6829.705 | 8.216782 | -7068 | 7.45E-05 | 779  | 0.333333 | 0.011952 | VWA5A    |
| 8557.801 | 13.24403 | -7068 | 7.33E-05 | 537  | 0.333333 | 0.006117 | OCM2     |
| 4328.375 | 8.063505 | -7068 | 7.35E-05 | 602  | 0.25     | 0.008111 | PZP      |
| 6074.924 | 5.584031 | -7068 | 7.49E-05 | 945  | 0.333333 | 0.013452 | NID1     |
| 8129.354 | 7.368573 | -7068 | 7.50E-05 | 896  | 0.333333 | 0.012824 | TRPC6    |
| 1400.166 | 9.138209 | -7068 | 7.19E-05 | 299  | 0.333333 | 0.003465 | PNLIPRP1 |



|          |          |       |          |      |          |          |          |
|----------|----------|-------|----------|------|----------|----------|----------|
| 5115.542 | 8.369253 | -7068 | 7.38E-05 | 651  | 0.333333 | 0.009288 | UCP3     |
| 10167.93 | 8.35525  | -7068 | 7.51E-05 | 926  | 0.333333 | 0.013494 | FABP4    |
| 6556.35  | 6.250007 | -7068 | 7.49E-05 | 915  | 0.333333 | 0.013107 | FGFR1    |
| 5511.298 | 7.292598 | -7068 | 7.42E-05 | 738  | 0.333333 | 0.010208 | RHOC     |
| 5625.706 | 6.6236   | -7068 | 7.47E-05 | 821  | 0.333333 | 0.012608 | STAM2    |
| 4034.263 | 6.258898 | -7068 | 7.42E-05 | 734  | 0.333333 | 0.011573 | LAMP2    |
| 3414.731 | 5.362884 | -7068 | 7.39E-05 | 742  | 0.333333 | 0.010514 | PGK1     |
| 1898.222 | 8.8273   | -7068 | 7.23E-05 | 380  | 0.333333 | 0.005347 | RPRD2    |
| 2382.193 | 6.452755 | -7068 | 7.30E-05 | 528  | 0.333333 | 0.007227 | LSM4     |
| 4557.72  | 8.11736  | -7068 | 7.33E-05 | 596  | 0.333333 | 0.007004 | NR1I3    |
| 6847.586 | 7.558776 | -7068 | 7.48E-05 | 849  | 0.333333 | 0.012989 | GLUL     |
| 1722.587 | 6.266495 | -7068 | 7.27E-05 | 460  | 0.333333 | 0.00625  | HSF1     |
| 3791.586 | 8.291827 | -7068 | 7.32E-05 | 543  | 0.333333 | 0.006831 | GH1      |
| 2843.283 | 8.230729 | -7068 | 7.28E-05 | 485  | 0.333333 | 0.006479 | SMAD9    |
| 4652.138 | 7.16836  | -7068 | 7.35E-05 | 658  | 0.333333 | 0.008259 | GZMB     |
| 3972.679 | 5.370006 | -7068 | 7.35E-05 | 712  | 0.333333 | 0.007421 | C8B      |
| 5573.622 | 7.209941 | -7068 | 7.45E-05 | 779  | 0.333333 | 0.012178 | ACKR3    |
| 9207.763 | 7.314695 | -7068 | 7.58E-05 | 1004 | 0.333333 | 0.015513 | SLC29A1  |
| 6008.282 | 8.756287 | -7068 | 7.41E-05 | 684  | 0.333333 | 0.009564 | HSPB6    |
| 2014.738 | 6.985122 | -7068 | 7.26E-05 | 459  | 0.333333 | 0.005759 | MAP2K7   |
| 5901.856 | 5.916881 | -7068 | 7.47E-05 | 885  | 0.333333 | 0.012222 | NEK2     |
| 5645.827 | 8.839541 | -7068 | 7.35E-05 | 623  | 0.333333 | 0.00801  | AGR2     |
| 7731.049 | 6.958397 | -7068 | 7.54E-05 | 941  | 0.333333 | 0.014686 | RGS2     |
| 12060.09 | 7.461403 | -7068 | 7.60E-05 | 1101 | 0.333333 | 0.016134 | SLC39A8  |
| 6898.165 | 8.555225 | -7068 | 7.41E-05 | 717  | 0.333333 | 0.009139 | ST14     |
| 2961.98  | 10.33279 | -7068 | 7.25E-05 | 405  | 0.333333 | 0.005183 | RGR      |
| 16801.65 | 5.300572 | -7068 | 7.79E-05 | 1588 | 0.333333 | 0.02148  | ZWINT    |
| 3737.382 | 11.5235  | -7068 | 7.28E-05 | 432  | 0.333333 | 0.005054 | RTEL1    |
| 6889.243 | 7.018735 | -7068 | 7.49E-05 | 874  | 0.333333 | 0.012812 | GM2A     |
| 10211.78 | 5.993759 | -7068 | 7.59E-05 | 1146 | 0.333333 | 0.01608  | ATP5C1   |
| 2944.548 | 6.723769 | -7068 | 7.34E-05 | 587  | 0.333333 | 0.008854 | ATP6V1C1 |
| 5433.416 | 9.030498 | -7068 | 7.39E-05 | 633  | 0.333333 | 0.00878  | SGSH     |
| 5804.941 | 7.465056 | -7068 | 7.43E-05 | 754  | 0.333333 | 0.011378 | ZCCHC24  |
| 9286.577 | 6.352234 | -7068 | 7.60E-05 | 1092 | 0.333333 | 0.016521 | WHSC1    |
| 4498.761 | 6.346264 | -7068 | 7.41E-05 | 758  | 0.333333 | 0.011225 | ACAA2    |
| 5941.122 | 6.126185 | -7068 | 7.49E-05 | 894  | 0.333333 | 0.013296 | ARF6     |
| 6276.567 | 8.802758 | -7068 | 7.41E-05 | 694  | 0.333333 | 0.009772 | SLC25A20 |
| 6362.1   | 7.125835 | -7068 | 7.49E-05 | 843  | 0.333333 | 0.012723 | SLC9A1   |
| 2344.231 | 7.861305 | -7068 | 7.28E-05 | 463  | 0.333333 | 0.006539 | SEMA3F   |
| 3907.301 | 12.53001 | -7068 | 7.26E-05 | 407  | 0.333333 | 0.005087 | RIBC2    |
| 2249.249 | 7.416454 | -7068 | 7.27E-05 | 474  | 0.333333 | 0.006547 | IRF4     |

|          |          |       |          |      |          |          |         |
|----------|----------|-------|----------|------|----------|----------|---------|
| 9959.387 | 6.705546 | -7068 | 7.60E-05 | 1073 | 0.333333 | 0.015903 | TBX5    |
| 3568.162 | 7.715918 | -7068 | 7.32E-05 | 567  | 0.333333 | 0.007535 | COL2A1  |
| 3059.121 | 9.777092 | -7068 | 7.28E-05 | 446  | 0.333333 | 0.005847 | GUCA1B  |
| 13604.85 | 6.236569 | -7068 | 7.71E-05 | 1326 | 0.333333 | 0.019608 | FLT1    |
| 3055.393 | 7.68566  | -7068 | 7.32E-05 | 539  | 0.333333 | 0.008006 | SNTB2   |
| 9484.577 | 6.358926 | -7068 | 7.60E-05 | 1112 | 0.333333 | 0.01667  | SKP2    |
| 8615.337 | 7.306936 | -7068 | 7.56E-05 | 957  | 0.333333 | 0.015134 | SCAPER  |
| 6051.348 | 7.546857 | -7068 | 7.46E-05 | 781  | 0.333333 | 0.012181 | DOCK10  |
| 1343.998 | 10.64806 | -7068 | 7.17E-05 | 257  | 0.333333 | 0.003413 | CLCNKA  |
| 3565.966 | 9.415749 | -7068 | 7.31E-05 | 494  | 0.333333 | 0.006338 | ZKSCAN3 |
| 3276.512 | 11.03149 | -7068 | 7.26E-05 | 416  | 0.333333 | 0.005667 | DOCK3   |
| 5526.974 | 7.262573 | -7068 | 7.44E-05 | 756  | 0.333333 | 0.011721 | SNX3    |
| 8429.583 | 8.183625 | -7068 | 7.50E-05 | 860  | 0.333333 | 0.012808 | LAD1    |
| 4305.542 | 8.768395 | -7068 | 7.31E-05 | 545  | 0.333333 | 0.006788 | LY6D    |
| 6804.86  | 6.14035  | -7068 | 7.52E-05 | 945  | 0.333333 | 0.013897 | KIF14   |
| 6958.694 | 6.885926 | -7068 | 7.49E-05 | 877  | 0.333333 | 0.012638 | IFI27   |
| 4488.426 | 6.030139 | -7068 | 7.38E-05 | 722  | 0.333333 | 0.008807 | CFHR2   |
| 4678.94  | 9.871704 | -7068 | 7.35E-05 | 566  | 0.333333 | 0.007918 | SYNGR3  |
| 4390.432 | 5.799421 | -7068 | 7.39E-05 | 744  | 0.25     | 0.009884 | FBLN2   |
| 5746.741 | 6.348927 | -7068 | 7.46E-05 | 847  | 0.333333 | 0.012027 | TTF2    |
| 4062.62  | 7.541809 | -7068 | 7.36E-05 | 621  | 0.333333 | 0.008735 | OLR1    |
| 2889.49  | 6.882229 | -7068 | 7.31E-05 | 549  | 0.333333 | 0.006861 | CASP10  |
| 9917.593 | 6.665232 | -7068 | 7.56E-05 | 1035 | 0.333333 | 0.014215 | TLR2    |
| 9840.955 | 8.395105 | -7068 | 7.52E-05 | 913  | 0.333333 | 0.013526 | RGS10   |
| 6972.781 | 7.552767 | -7068 | 7.47E-05 | 837  | 0.333333 | 0.012414 | GDF15   |
| 9769.875 | 5.751081 | -7068 | 7.60E-05 | 1155 | 0.333333 | 0.015857 | CXCL8   |
| 3019.383 | 9.192031 | -7068 | 7.28E-05 | 459  | 0.333333 | 0.005634 | GCAT    |
| 2538.475 | 8.602766 | -7068 | 7.28E-05 | 468  | 0.333333 | 0.00669  | DHODH   |
| 4010.644 | 6.502597 | -7068 | 7.35E-05 | 653  | 0.333333 | 0.008246 | COX4I1  |
| 1072.049 | 7.752478 | -7068 | 7.19E-05 | 320  | 0.333333 | 0.004797 | PIGC    |
| 5608.957 | 7.40079  | -7068 | 7.43E-05 | 744  | 0.333333 | 0.010355 | TUBB3   |
| 3025.286 | 6.865433 | -7068 | 7.34E-05 | 588  | 0.333333 | 0.008787 | KCNB1   |
| 4143.412 | 10.02315 | -7068 | 7.32E-05 | 518  | 0.333333 | 0.007208 | PTP4A3  |
| 6909.262 | 7.522411 | -7068 | 7.47E-05 | 836  | 0.333333 | 0.012261 | TRIM14  |
| 10826.41 | 6.565343 | -7068 | 7.63E-05 | 1141 | 0.333333 | 0.017636 | ST3GAL6 |
| 4213.411 | 5.210574 | -7068 | 7.41E-05 | 800  | 0.333333 | 0.010666 | FBLN1   |
| 8231.981 | 8.372624 | -7068 | 7.49E-05 | 840  | 0.333333 | 0.012178 | RASA3   |
| 5301.271 | 8.406428 | -7068 | 7.39E-05 | 663  | 0.333333 | 0.009763 | HRH1    |
| 2064.825 | 9.692293 | -7068 | 7.24E-05 | 376  | 0.333333 | 0.005558 | MGA     |
| 5034.54  | 7.668027 | -7068 | 7.40E-05 | 689  | 0.333333 | 0.010316 | INPP4A  |
| 7894.361 | 9.859403 | -7068 | 7.42E-05 | 725  | 0.333333 | 0.010229 | PITX1   |

|          |          |       |          |      |          |          |          |
|----------|----------|-------|----------|------|----------|----------|----------|
| 5742.999 | 7.516651 | -7068 | 7.44E-05 | 769  | 0.333333 | 0.011169 | LIMK2    |
| 6393.896 | 6.292605 | -7068 | 7.47E-05 | 886  | 0.333333 | 0.011723 | ACO2     |
| 4109.134 | 7.699587 | -7068 | 7.37E-05 | 635  | 0.333333 | 0.009704 | ABHD2    |
| 792.8647 | 10.51558 | -7068 | 7.15E-05 | 210  | 0.333333 | 0.002475 | CACTIN   |
| 4330.87  | 9.384746 | -7068 | 7.34E-05 | 546  | 0.333333 | 0.006986 | ARID3A   |
| 10366.07 | 6.978367 | -7068 | 7.61E-05 | 1086 | 0.333333 | 0.01682  | SLC1A3   |
| 8680.588 | 6.902903 | -7068 | 7.56E-05 | 1002 | 0.333333 | 0.015355 | STOM     |
| 2729.859 | 8.435356 | -7068 | 7.30E-05 | 484  | 0.333333 | 0.006988 | CAPN15   |
| 6241.09  | 7.144357 | -7068 | 7.48E-05 | 829  | 0.333333 | 0.013054 | SLC20A2  |
| 7344.401 | 5.923712 | -7068 | 7.53E-05 | 1015 | 0.333333 | 0.014297 | SF3B3    |
| 7581.007 | 7.521561 | -7068 | 7.47E-05 | 842  | 0.333333 | 0.011182 | PCOLCE   |
| 9141.679 | 6.884124 | -7068 | 7.56E-05 | 1017 | 0.333333 | 0.015123 | SORBS1   |
| 3742.876 | 6.080865 | -7068 | 7.38E-05 | 672  | 0.333333 | 0.009153 | PLEK     |
| 1538.665 | 8.55782  | -7068 | 7.23E-05 | 364  | 0.333333 | 0.0053   | ATXN7    |
| 4580.907 | 8.090025 | -7068 | 7.35E-05 | 606  | 0.333333 | 0.00782  | CLDN7    |
| 8944.429 | 7.83258  | -7068 | 7.53E-05 | 929  | 0.333333 | 0.014001 | ST3GAL4  |
| 12250.31 | 6.409475 | -7068 | 7.69E-05 | 1249 | 0.333333 | 0.019452 | MYH10    |
| 4269.759 | 7.40704  | -7068 | 7.38E-05 | 663  | 0.333333 | 0.009664 | IFI6     |
| 4111.261 | 5.914721 | -7068 | 7.39E-05 | 740  | 0.333333 | 0.01004  | ITGAX    |
| 4685.799 | 7.227733 | -7068 | 7.42E-05 | 716  | 0.333333 | 0.010985 | CDC42EP4 |
| 2564.618 | 9.787909 | -7068 | 7.26E-05 | 407  | 0.333333 | 0.005172 | SLC29A2  |
| 4526.957 | 6.879216 | -7068 | 7.42E-05 | 727  | 0.333333 | 0.011329 | BICD1    |
| 3030.362 | 7.538239 | -7068 | 7.27E-05 | 489  | 0.25     | 0.005537 | C8G      |
| 4341.973 | 7.025288 | -7068 | 7.40E-05 | 697  | 0.333333 | 0.010149 | CX3CL1   |
| 9173.216 | 7.187704 | -7068 | 7.56E-05 | 991  | 0.333333 | 0.015104 | NEFM     |
| 5171.361 | 8.551948 | -7068 | 7.39E-05 | 664  | 0.333333 | 0.009727 | HSD17B1  |
| 5072.195 | 10.93445 | -7068 | 7.30E-05 | 488  | 0.333333 | 0.005579 | CTRB2    |
| 5178.143 | 8.029576 | -7068 | 7.39E-05 | 676  | 0.333333 | 0.00952  | TFF3     |
| 2582.399 | 9.208197 | -7068 | 7.27E-05 | 432  | 0.333333 | 0.005885 | IFT27    |
| 3006.045 | 8.334861 | -7068 | 7.30E-05 | 504  | 0.333333 | 0.006769 | RASSF1   |
| 7132.289 | 7.026769 | -7068 | 7.51E-05 | 902  | 0.333333 | 0.014151 | ARIH2    |
| 2522.737 | 9.318855 | -7068 | 7.25E-05 | 417  | 0.333333 | 0.005492 | CST6     |
| 7436.909 | 7.064892 | -7068 | 7.49E-05 | 896  | 0.333333 | 0.01266  | IL2RA    |
| 1898.233 | 6.973153 | -7068 | 7.27E-05 | 453  | 0.333333 | 0.006609 | CHERP    |
| 6211.2   | 6.884118 | -7068 | 7.48E-05 | 844  | 0.333333 | 0.012821 | PLXNA2   |
| 2393.233 | 6.062587 | -7068 | 7.31E-05 | 569  | 0.333333 | 0.008685 | CTNND1   |
| 5027.313 | 6.939948 | -7068 | 7.43E-05 | 757  | 0.333333 | 0.01165  | CPEB3    |
| 6277.405 | 8.126765 | -7068 | 7.44E-05 | 753  | 0.333333 | 0.011053 | LUZP1    |
| 23796.53 | 7.02538  | -7068 | 7.92E-05 | 1627 | 0.333333 | 0.024837 | CACNA1C  |
| 3174.727 | 4.579033 | -7068 | 7.36E-05 | 748  | 0.333333 | 0.009065 | MRE11A   |
| 2492.995 | 4.235077 | -7068 | 7.33E-05 | 651  | 0.333333 | 0.007872 | SPC25    |

|          |          |       |          |      |          |          |          |
|----------|----------|-------|----------|------|----------|----------|----------|
| 16632.35 | 6.093743 | -7068 | 7.79E-05 | 1494 | 0.333333 | 0.021808 | MELK     |
| 5075.663 | 6.462304 | -7068 | 7.44E-05 | 799  | 0.333333 | 0.011614 | CTTN     |
| 3948.023 | 7.642823 | -7068 | 7.35E-05 | 614  | 0.333333 | 0.008309 | AKR1A1   |
| 5784.978 | 7.407806 | -7068 | 7.44E-05 | 769  | 0.333333 | 0.011558 | SERPINB8 |
| 5770.195 | 7.669493 | -7068 | 7.43E-05 | 743  | 0.333333 | 0.010598 | PPP1R15A |
| 6188.941 | 6.968432 | -7068 | 7.45E-05 | 811  | 0.333333 | 0.011653 | COL8A1   |
| 3335.849 | 8.079245 | -7068 | 7.34E-05 | 555  | 0.333333 | 0.008006 | OGG1     |
| 5637.147 | 4.969408 | -7068 | 7.46E-05 | 960  | 0.333333 | 0.012006 | AURKA    |
| 15604.53 | 6.534234 | -7068 | 7.77E-05 | 1393 | 0.333333 | 0.021093 | KLF6     |
| 9606.706 | 7.164942 | -7068 | 7.58E-05 | 1028 | 0.333333 | 0.015899 | PLA2G4A  |
| 1760.975 | 6.780186 | -7068 | 7.25E-05 | 432  | 0.333333 | 0.005741 | NOTCH4   |
| 4052.51  | 8.107553 | -7068 | 7.34E-05 | 581  | 0.333333 | 0.007938 | BUD31    |
| 2455.935 | 8.108158 | -7068 | 7.28E-05 | 459  | 0.333333 | 0.005985 | CDC34    |
| 6947.794 | 7.165007 | -7068 | 7.49E-05 | 867  | 0.333333 | 0.013453 | SEMA5A   |
| 2467.174 | 9.053243 | -7068 | 7.27E-05 | 420  | 0.333333 | 0.005732 | MYH6     |
| 6451.332 | 7.359989 | -7068 | 7.45E-05 | 811  | 0.333333 | 0.012037 | CLIC5    |
| 2029.843 | 8.276433 | -7068 | 7.23E-05 | 398  | 0.333333 | 0.004967 | HNF1A    |
| 14442.3  | 6.808283 | -7068 | 7.72E-05 | 1289 | 0.333333 | 0.019232 | SLC8A1   |
| 5077.396 | 6.337723 | -7068 | 7.47E-05 | 824  | 0.333333 | 0.01335  | N4BP1    |
| 5988.576 | 7.346873 | -7068 | 7.44E-05 | 788  | 0.333333 | 0.011723 | EDN3     |
| 5551.454 | 6.075719 | -7068 | 7.44E-05 | 820  | 0.333333 | 0.010893 | CXCL1    |
| 11125.02 | 6.479514 | -7068 | 7.64E-05 | 1175 | 0.333333 | 0.017267 | TF       |
| 8132.598 | 6.470783 | -7068 | 7.55E-05 | 1003 | 0.333333 | 0.015065 | DST      |
| 3517.574 | 8.826527 | -7068 | 7.32E-05 | 522  | 0.333333 | 0.007205 | INPP5J   |
| 7635.245 | 8.375354 | -7068 | 7.46E-05 | 797  | 0.333333 | 0.011693 | SLC16A4  |
| 3874.954 | 6.975719 | -7068 | 7.38E-05 | 671  | 0.333333 | 0.009945 | TMEM106C |
| 2792.194 | 6.399993 | -7068 | 7.35E-05 | 604  | 0.333333 | 0.009738 | VAMP4    |
| 1842.055 | 9.25667  | -7068 | 7.22E-05 | 351  | 0.333333 | 0.005339 | KLHL20   |
| 3533.195 | 9.916634 | -7068 | 7.30E-05 | 475  | 0.333333 | 0.006452 | LIPE     |
| 16745.25 | 6.089392 | -7068 | 7.83E-05 | 1530 | 0.333333 | 0.023549 | TMPO     |
| 8900.789 | 6.370044 | -7068 | 7.59E-05 | 1073 | 0.333333 | 0.016394 | MYO10    |
| 4890.173 | 7.460454 | -7068 | 7.42E-05 | 713  | 0.333333 | 0.010969 | MRPL33   |
| 4870.748 | 7.425319 | -7068 | 7.41E-05 | 713  | 0.333333 | 0.010772 | GATM     |
| 7583.578 | 6.854851 | -7068 | 7.50E-05 | 922  | 0.333333 | 0.013538 | HPGD     |
| 7781.159 | 9.075296 | -7068 | 7.46E-05 | 779  | 0.333333 | 0.010934 | SCO2     |
| 7787.41  | 6.921695 | -7068 | 7.52E-05 | 939  | 0.333333 | 0.013453 | PKM      |
| 6130.622 | 7.459074 | -7068 | 7.45E-05 | 798  | 0.333333 | 0.011696 | ELL      |
| 4637.311 | 7.550734 | -7068 | 7.40E-05 | 683  | 0.333333 | 0.010327 | INTS10   |
| 6655.836 | 7.457069 | -7068 | 7.44E-05 | 799  | 0.333333 | 0.010575 | HSD11B1  |
| 2860.821 | 7.277136 | -7068 | 7.30E-05 | 517  | 0.333333 | 0.006475 | APOF     |
| 4308.561 | 6.775722 | -7068 | 7.41E-05 | 708  | 0.333333 | 0.010412 | HCCS     |

|          |          |       |          |      |          |          |          |
|----------|----------|-------|----------|------|----------|----------|----------|
| 3589.014 | 5.122504 | -7068 | 7.41E-05 | 766  | 0.333333 | 0.010521 | YBX1     |
| 9276.224 | 3.636165 | -7068 | 7.62E-05 | 1463 | 0.333333 | 0.016435 | CDK1     |
| 2782.938 | 9.483628 | -7068 | 7.27E-05 | 428  | 0.333333 | 0.005397 | HAVCR1   |
| 2219.606 | 8.600227 | -7068 | 7.26E-05 | 426  | 0.333333 | 0.006113 | TMCC2    |
| 3158.359 | 7.54432  | -7068 | 7.31E-05 | 545  | 0.333333 | 0.00721  | ATP5G2   |
| 10657.57 | 7.215129 | -7068 | 7.60E-05 | 1065 | 0.333333 | 0.016115 | B3GALNT1 |
| 13475.94 | 6.378741 | -7068 | 7.72E-05 | 1314 | 0.333333 | 0.019888 | SPRY1    |
| 2496.293 | 8.092039 | -7068 | 7.26E-05 | 447  | 0.333333 | 0.005747 | VGLL1    |
| 6679.693 | 6.822146 | -7068 | 7.49E-05 | 883  | 0.333333 | 0.013129 | CACYBP   |
| 3936.231 | 8.218212 | -7068 | 7.36E-05 | 600  | 0.333333 | 0.008892 | DKK1     |
| 3130.161 | 4.946745 | -7068 | 7.37E-05 | 715  | 0.333333 | 0.009886 | TIMP3    |
| 15932.13 | 5.472963 | -7068 | 7.78E-05 | 1538 | 0.333333 | 0.021407 | COL1A2   |
| 2040.06  | 8.278304 | -7068 | 7.26E-05 | 398  | 0.333333 | 0.004808 | POLRMT   |
| 4489.62  | 9.572663 | -7068 | 7.34E-05 | 555  | 0.333333 | 0.007732 | MPI      |
| 3268.504 | 6.553879 | -7068 | 7.35E-05 | 622  | 0.333333 | 0.008718 | PRDX2    |
| 7384.238 | 8.839651 | -7068 | 7.44E-05 | 747  | 0.333333 | 0.010556 | SERPINF1 |
| 1912.959 | 7.49666  | -7068 | 7.25E-05 | 418  | 0.333333 | 0.005231 | SLC11A1  |
| 4143.304 | 8.674254 | -7068 | 7.36E-05 | 605  | 0.333333 | 0.009412 | YME1L1   |
| 3320.112 | 6.92862  | -7068 | 7.33E-05 | 580  | 0.333333 | 0.00757  | CXCL3    |
| 4808.873 | 9.956273 | -7068 | 7.31E-05 | 512  | 0.333333 | 0.006055 | KIR3DL3  |
| 8001.99  | 5.826457 | -7068 | 7.56E-05 | 1060 | 0.333333 | 0.015527 | MSH6     |
| 2284.57  | 7.90649  | -7068 | 7.26E-05 | 439  | 0.333333 | 0.005552 | ATP5I    |
| 1257.656 | 7.221568 | -7068 | 7.22E-05 | 352  | 0.333333 | 0.004711 | ARHGAP45 |
| 3665.301 | 7.024336 | -7068 | 7.36E-05 | 623  | 0.333333 | 0.008678 | MMP11    |
| 5570.769 | 9.267484 | -7068 | 7.38E-05 | 641  | 0.333333 | 0.0091   | MTF1     |
| 9856.167 | 8.645549 | -7068 | 7.52E-05 | 899  | 0.333333 | 0.013128 | NUDT1    |
| 5600.519 | 5.584757 | -7068 | 7.47E-05 | 887  | 0.333333 | 0.012445 | LUM      |
| 9283.292 | 6.783655 | -7068 | 7.60E-05 | 1052 | 0.333333 | 0.016263 | CHD1L    |
| 2291.134 | 7.076568 | -7068 | 7.29E-05 | 493  | 0.333333 | 0.007333 | SEC22B   |
| 6355.896 | 7.671715 | -7068 | 7.44E-05 | 763  | 0.333333 | 0.011318 | PFKFB3   |
| 5362.688 | 8.028269 | -7068 | 7.38E-05 | 666  | 0.333333 | 0.008832 | KLK8     |
| 3428.856 | 5.688595 | -7068 | 7.38E-05 | 699  | 0.333333 | 0.009585 | TPI1     |
| 1700.328 | 9.662983 | -7068 | 7.21E-05 | 324  | 0.333333 | 0.004383 | HOXC6    |
| 1851.642 | 7.340011 | -7068 | 7.27E-05 | 439  | 0.333333 | 0.006326 | MYDGF    |
| 3446.62  | 7.258121 | -7068 | 7.36E-05 | 605  | 0.333333 | 0.009272 | ALDH1A3  |
| 4052.269 | 4.91088  | -7068 | 7.41E-05 | 806  | 0.333333 | 0.010245 | COL1A1   |
| 7315.639 | 8.077232 | -7068 | 7.47E-05 | 820  | 0.333333 | 0.012262 | DBH      |
| 4974.019 | 7.915912 | -7068 | 7.41E-05 | 684  | 0.333333 | 0.010584 | SMPDL3A  |
| 4595.929 | 6.524433 | -7068 | 7.42E-05 | 747  | 0.333333 | 0.011135 | NR4A2    |
| 5697.094 | 7.88547  | -7068 | 7.42E-05 | 720  | 0.333333 | 0.010164 | MARCO    |
| 7315.692 | 7.53301  | -7068 | 7.47E-05 | 819  | 0.333333 | 0.011163 | S100A2   |

|          |          |       |          |      |          |          |         |
|----------|----------|-------|----------|------|----------|----------|---------|
| 6969.198 | 9.260402 | -7068 | 7.41E-05 | 717  | 0.333333 | 0.009795 | TUBB4A  |
| 3234.108 | 5.566068 | -7068 | 7.29E-05 | 595  | 0.333333 | 0.006923 | NDUFB3  |
| 3581.973 | 9.415839 | -7068 | 7.30E-05 | 491  | 0.333333 | 0.00649  | NFATC4  |
| 5248.724 | 5.591172 | -7068 | 7.45E-05 | 847  | 0.333333 | 0.011236 | CCL2    |
| 6437.201 | 7.18916  | -7068 | 7.46E-05 | 806  | 0.333333 | 0.011356 | S100A4  |
| 2788.149 | 7.304562 | -7068 | 7.30E-05 | 527  | 0.333333 | 0.007577 | LPAR1   |
| 5591.33  | 7.168623 | -7068 | 7.45E-05 | 772  | 0.333333 | 0.011928 | NMNAT2  |
| 5951.17  | 7.562507 | -7068 | 7.44E-05 | 759  | 0.333333 | 0.011102 | GPRC5B  |
| 4408.163 | 7.680912 | -7068 | 7.37E-05 | 648  | 0.333333 | 0.009145 | ESR2    |
| 1697.478 | 9.594314 | -7068 | 7.22E-05 | 338  | 0.333333 | 0.004804 | MTMR7   |
| 7723.347 | 7.356417 | -7068 | 7.52E-05 | 904  | 0.333333 | 0.013724 | ARG2    |
| 6569.269 | 6.807136 | -7068 | 7.46E-05 | 857  | 0.333333 | 0.012199 | FASLG   |
| 2611.078 | 6.00529  | -7068 | 7.34E-05 | 603  | 0.333333 | 0.009149 | DDX3X   |
| 3400.635 | 6.99593  | -7068 | 7.36E-05 | 621  | 0.333333 | 0.009398 | UTRN    |
| 4615.248 | 7.927524 | -7068 | 7.37E-05 | 640  | 0.333333 | 0.008884 | CAPN6   |
| 4702.296 | 6.804452 | -7068 | 7.40E-05 | 727  | 0.333333 | 0.010761 | GALNT3  |
| 2719.783 | 7.854952 | -7068 | 7.30E-05 | 505  | 0.333333 | 0.007449 | IKZF1   |
| 1160.905 | 6.098106 | -7068 | 7.13E-05 | 290  | 0.333333 | 0.002843 | ZNF92   |
| 3885.282 | 7.015787 | -7068 | 7.38E-05 | 650  | 0.333333 | 0.009894 | TSPYL1  |
| 15674.36 | 6.778109 | -7068 | 7.75E-05 | 1349 | 0.333333 | 0.020853 | DTNA    |
| 3756.944 | 6.586122 | -7068 | 7.38E-05 | 678  | 0.333333 | 0.00983  | HMGCS1  |
| 1209.874 | 5.531521 | -7068 | 7.25E-05 | 431  | 0.333333 | 0.00681  | SUB1    |
| 10637.95 | 5.197666 | -7068 | 7.65E-05 | 1306 | 0.333333 | 0.018342 | LAMA4   |
| 6296.88  | 4.099255 | -7068 | 7.52E-05 | 1138 | 0.333333 | 0.014165 | SRSF1   |
| 8577.25  | 7.813371 | -7068 | 7.50E-05 | 888  | 0.333333 | 0.01297  | GLI2    |
| 6997.019 | 9.507972 | -7068 | 7.40E-05 | 681  | 0.333333 | 0.00917  | P2RY6   |
| 2211.1   | 4.58485  | -7068 | 7.31E-05 | 639  | 0.333333 | 0.008247 | PRIM2   |
| 2733.178 | 8.214731 | -7068 | 7.29E-05 | 478  | 0.333333 | 0.006841 | FLG     |
| 8097.096 | 6.78222  | -7068 | 7.55E-05 | 985  | 0.333333 | 0.015012 | DUSP10  |
| 2692.882 | 7.469986 | -7068 | 7.30E-05 | 509  | 0.333333 | 0.007128 | MMP10   |
| 5960.828 | 6.892033 | -7068 | 7.46E-05 | 816  | 0.333333 | 0.012243 | MT1X    |
| 2682.982 | 6.016655 | -7068 | 7.33E-05 | 595  | 0.333333 | 0.008561 | COL4A6  |
| 17973.79 | 6.498487 | -7068 | 7.83E-05 | 1496 | 0.333333 | 0.023075 | PTHLH   |
| 2020.098 | 7.844335 | -7068 | 7.24E-05 | 418  | 0.333333 | 0.005183 | GRIN1   |
| 1963.712 | 6.977021 | -7068 | 7.28E-05 | 466  | 0.333333 | 0.007341 | TMCO1   |
| 7576.944 | 7.512749 | -7068 | 7.51E-05 | 879  | 0.333333 | 0.013209 | GPLD1   |
| 4055.724 | 6.601414 | -7068 | 7.38E-05 | 691  | 0.333333 | 0.010074 | RBM3    |
| 9581.598 | 6.35495  | -7068 | 7.60E-05 | 1103 | 0.333333 | 0.016763 | KITLG   |
| 5709.344 | 7.581336 | -7068 | 7.43E-05 | 760  | 0.333333 | 0.011516 | ENOX2   |
| 1932.769 | 9.590609 | -7068 | 7.23E-05 | 359  | 0.25     | 0.005083 | RUNDC3B |
| 2099.06  | 8.884428 | -7068 | 7.25E-05 | 390  | 0.333333 | 0.005374 | ADGRG2  |

|          |          |       |          |      |          |          |          |
|----------|----------|-------|----------|------|----------|----------|----------|
| 6954.044 | 6.58404  | -7068 | 7.51E-05 | 909  | 0.333333 | 0.013278 | DUSP1    |
| 9373.306 | 6.959496 | -7068 | 7.58E-05 | 1026 | 0.333333 | 0.015651 | PHLDA1   |
| 2831.721 | 8.110728 | -7068 | 7.27E-05 | 462  | 0.333333 | 0.005529 | GZMH     |
| 5175.711 | 8.412456 | -7068 | 7.38E-05 | 641  | 0.333333 | 0.008655 | CFD      |
| 5544.624 | 7.367491 | -7068 | 7.42E-05 | 738  | 0.333333 | 0.0108   | BMP5     |
| 7192.82  | 7.313678 | -7068 | 7.47E-05 | 858  | 0.333333 | 0.012198 | MASP1    |
| 2861.814 | 8.210227 | -7068 | 7.30E-05 | 498  | 0.333333 | 0.006649 | ESRRA    |
| 6711.811 | 6.777304 | -7068 | 7.49E-05 | 887  | 0.333333 | 0.012974 | DBI      |
| 9629.771 | 5.767922 | -7068 | 7.62E-05 | 1173 | 0.333333 | 0.01698  | MCL1     |
| 18812.39 | 6.430323 | -7068 | 7.85E-05 | 1534 | 0.333333 | 0.023389 | NRP2     |
| 7318.194 | 6.460378 | -7068 | 7.46E-05 | 886  | 0.333333 | 0.011392 | COX5B    |
| 1501.703 | 6.64093  | -7068 | 7.25E-05 | 423  | 0.333333 | 0.006446 | MIOS     |
| 5295.386 | 6.653114 | -7068 | 7.44E-05 | 786  | 0.25     | 0.011924 | HTRA1    |
| 5047.703 | 6.712198 | -7068 | 7.41E-05 | 755  | 0.333333 | 0.010501 | PGR      |
| 4728.753 | 7.682527 | -7068 | 7.40E-05 | 688  | 0.333333 | 0.010032 | ELL2     |
| 3541.991 | 8.236113 | -7068 | 7.30E-05 | 533  | 0.333333 | 0.007012 | CCL17    |
| 7434.526 | 6.031568 | -7068 | 7.51E-05 | 979  | 0.333333 | 0.012733 | UBE2C    |
| 2313.49  | 8.705309 | -7068 | 7.26E-05 | 432  | 0.333333 | 0.005933 | TEP1     |
| 6709.329 | 8.230985 | -7068 | 7.44E-05 | 760  | 0.333333 | 0.011489 | TNR      |
| 2697.624 | 6.200314 | -7068 | 7.29E-05 | 546  | 0.25     | 0.006528 | CFHR4    |
| 3865.043 | 5.513094 | -7068 | 7.39E-05 | 735  | 0.333333 | 0.009763 | STIL     |
| 5149.226 | 7.88742  | -7068 | 7.41E-05 | 704  | 0.333333 | 0.010801 | MBD1     |
| 2113.657 | 7.104532 | -7068 | 7.27E-05 | 467  | 0.333333 | 0.006527 | IFI44L   |
| 7048.269 | 6.927134 | -7068 | 7.47E-05 | 865  | 0.333333 | 0.011213 | CFL1     |
| 5404.081 | 7.847268 | -7068 | 7.42E-05 | 717  | 0.333333 | 0.010965 | PROCR    |
| 4275.578 | 7.498341 | -7068 | 7.37E-05 | 635  | 0.333333 | 0.008784 | SCNN1A   |
| 3673.368 | 6.101169 | -7068 | 7.40E-05 | 695  | 0.333333 | 0.010425 | STMN1    |
| 1917.682 | 6.178892 | -7068 | 7.29E-05 | 497  | 0.333333 | 0.007502 | RSL1D1   |
| 3907.93  | 7.687372 | -7068 | 7.34E-05 | 589  | 0.333333 | 0.007687 | ALDH6A1  |
| 8978.019 | 8.591966 | -7068 | 7.49E-05 | 863  | 0.333333 | 0.012618 | MTUS2    |
| 8418.008 | 6.866318 | -7068 | 7.54E-05 | 974  | 0.333333 | 0.014552 | CA12     |
| 3293.41  | 6.317572 | -7068 | 7.38E-05 | 650  | 0.333333 | 0.009814 | PROS1    |
| 3787.263 | 8.713321 | -7068 | 7.32E-05 | 535  | 0.333333 | 0.007731 | CASR     |
| 2275.113 | 6.835555 | -7068 | 7.28E-05 | 487  | 0.333333 | 0.006453 | PSG9     |
| 9554.062 | 7.175065 | -7068 | 7.57E-05 | 1011 | 0.333333 | 0.015718 | AHNAK    |
| 1610.472 | 7.813334 | -7068 | 7.24E-05 | 384  | 0.333333 | 0.005234 | TADA3    |
| 7060.633 | 6.378797 | -7068 | 7.49E-05 | 922  | 0.333333 | 0.012718 | SERPINE1 |
| 2316.928 | 6.055935 | -7068 | 7.33E-05 | 567  | 0.333333 | 0.008739 | VAMP3    |
| 4646.76  | 8.082713 | -7068 | 7.38E-05 | 643  | 0.333333 | 0.009368 | GOLIM4   |
| 5874.546 | 5.867146 | -7068 | 7.47E-05 | 891  | 0.333333 | 0.012608 | THBD     |
| 6368.405 | 6.46635  | -7068 | 7.50E-05 | 894  | 0.333333 | 0.014027 | OLFM1    |

|          |          |       |          |      |          |          |          |
|----------|----------|-------|----------|------|----------|----------|----------|
| 4980.462 | 5.867445 | -7068 | 7.42E-05 | 796  | 0.333333 | 0.010664 | POLE2    |
| 2415.93  | 6.927288 | -7068 | 7.30E-05 | 510  | 0.333333 | 0.007368 | TSFM     |
| 3982.009 | 10.51571 | -7068 | 7.29E-05 | 481  | 0.333333 | 0.006705 | MMP20    |
| 3930.799 | 8.05422  | -7068 | 7.36E-05 | 601  | 0.25     | 0.009229 | CCKBR    |
| 1492.583 | 9.353417 | -7068 | 7.21E-05 | 321  | 0.333333 | 0.004337 | SLC26A10 |
| 2063.775 | 8.821458 | -7068 | 7.24E-05 | 401  | 0.333333 | 0.005898 | B4GALT6  |
| 7429.941 | 7.389302 | -7068 | 7.51E-05 | 881  | 0.333333 | 0.013468 | CEP152   |
| 5834.659 | 6.670757 | -7068 | 7.43E-05 | 796  | 0.333333 | 0.010258 | HPX      |
| 5155.463 | 6.914382 | -7068 | 7.42E-05 | 761  | 0.333333 | 0.010832 | DNAJB1   |
| 8766.39  | 6.892195 | -7068 | 7.57E-05 | 1017 | 0.333333 | 0.015866 | RCAN1    |
| 4147.265 | 6.954051 | -7068 | 7.37E-05 | 674  | 0.333333 | 0.009463 | ACOX1    |
| 5086.303 | 8.927493 | -7068 | 7.37E-05 | 620  | 0.333333 | 0.008876 | HOMER2   |
| 5226.278 | 7.908823 | -7068 | 7.40E-05 | 701  | 0.333333 | 0.010791 | MYCN     |
| 5098.545 | 6.526879 | -7068 | 7.42E-05 | 755  | 0.333333 | 0.010746 | MAPKAPK5 |
| 3935.323 | 7.176336 | -7068 | 7.38E-05 | 644  | 0.333333 | 0.009025 | PLEC     |
| 3363.234 | 9.108528 | -7068 | 7.30E-05 | 487  | 0.333333 | 0.006476 | CRLF1    |
| 5408.665 | 7.043346 | -7068 | 7.45E-05 | 778  | 0.333333 | 0.012331 | SATB2    |
| 10174.6  | 6.587078 | -7068 | 7.59E-05 | 1089 | 0.333333 | 0.016065 | THBS2    |
| 3857.459 | 8.956585 | -7068 | 7.33E-05 | 539  | 0.333333 | 0.008203 | RHOBTB3  |
| 9469.3   | 6.536177 | -7068 | 7.62E-05 | 1087 | 0.333333 | 0.017096 | ABCC4    |
| 3761.659 | 9.251323 | -7068 | 7.32E-05 | 512  | 0.333333 | 0.006787 | HIC1     |
| 3271.276 | 6.5694   | -7068 | 7.35E-05 | 617  | 0.333333 | 0.008734 | CXCL10   |
| 10255.7  | 7.810949 | -7068 | 7.49E-05 | 928  | 0.333333 | 0.01197  | RBP4     |
| 4654.199 | 8.553588 | -7068 | 7.35E-05 | 605  | 0.333333 | 0.008647 | PTX3     |
| 5677.83  | 7.195166 | -7068 | 7.45E-05 | 780  | 0.333333 | 0.012023 | SSH1     |
| 16533.83 | 6.388601 | -7068 | 7.81E-05 | 1450 | 0.333333 | 0.022461 | SLIT3    |
| 5472.989 | 7.304852 | -7068 | 7.41E-05 | 737  | 0.333333 | 0.010123 | MSMO1    |
| 8959.323 | 7.001168 | -7068 | 7.57E-05 | 1008 | 0.333333 | 0.015307 | AQP1     |
| 3231.786 | 4.886704 | -7068 | 7.40E-05 | 744  | 0.333333 | 0.010888 | FILIP1L  |
| 5754.972 | 7.729828 | -7068 | 7.44E-05 | 748  | 0.333333 | 0.011026 | FLOT1    |
| 2931.627 | 5.973552 | -7068 | 7.35E-05 | 628  | 0.333333 | 0.008873 | MAP2K3   |
| 4227.283 | 6.917988 | -7068 | 7.38E-05 | 682  | 0.333333 | 0.009334 | ITGA7    |
| 3283.645 | 11.39426 | -7068 | 7.24E-05 | 377  | 0.333333 | 0.004308 | LCN1     |
| 7047.587 | 7.32966  | -7068 | 7.50E-05 | 862  | 0.333333 | 0.013213 | PARN     |
| 4890.193 | 7.689961 | -7068 | 7.39E-05 | 670  | 0.333333 | 0.009463 | LAMP3    |
| 13400.5  | 6.913987 | -7068 | 7.68E-05 | 1227 | 0.333333 | 0.018157 | RAB3B    |
| 3431.848 | 8.206864 | -7068 | 7.34E-05 | 555  | 0.333333 | 0.008549 | THAP3    |
| 2169.381 | 7.819022 | -7068 | 7.26E-05 | 432  | 0.333333 | 0.005612 | CLEC10A  |
| 1821.501 | 9.466024 | -7068 | 7.22E-05 | 355  | 0.333333 | 0.004713 | AMH      |
| 4789.716 | 9.718278 | -7068 | 7.34E-05 | 562  | 0.333333 | 0.007631 | PAK4     |
| 4102.32  | 8.001595 | -7068 | 7.37E-05 | 616  | 0.333333 | 0.008863 | NADK     |



|          |          |       |          |      |          |          |          |
|----------|----------|-------|----------|------|----------|----------|----------|
| 5562.537 | 7.727393 | -7068 | 7.42E-05 | 715  | 0.333333 | 0.009974 | RNASEH2A |
| 2180.74  | 9.817573 | -7068 | 7.23E-05 | 378  | 0.333333 | 0.00513  | MICA     |
| 5036.383 | 6.551791 | -7068 | 7.43E-05 | 756  | 0.333333 | 0.010366 | KIF22    |
| 2570.666 | 7.269764 | -7068 | 7.32E-05 | 526  | 0.333333 | 0.007979 | TLE3     |
| 7998.801 | 7.274498 | -7068 | 7.51E-05 | 919  | 0.333333 | 0.013861 | CELSR1   |
| 3194.505 | 8.64701  | -7068 | 7.31E-05 | 508  | 0.333333 | 0.007461 | RNF216   |
| 3670.085 | 11.07785 | -7068 | 7.26E-05 | 427  | 0.333333 | 0.005546 | TFEB     |
| 6405.652 | 21.93054 | -7068 | 7.24E-05 | 391  | 0.333333 | 0.005385 | UGT2B17  |
| 6582.21  | 18.53424 | -7068 | 7.25E-05 | 439  | 0.333333 | 0.005594 | UGT2B15  |
| 3962.832 | 5.829715 | -7068 | 7.41E-05 | 747  | 0.25     | 0.011071 | ITGA1    |
| 12968.21 | 7.055701 | -7068 | 7.68E-05 | 1203 | 0.333333 | 0.018975 | EFNA5    |
| 3251.848 | 7.836807 | -7068 | 7.33E-05 | 550  | 0.333333 | 0.008095 | VIP      |
| 7014.89  | 6.968605 | -7068 | 7.51E-05 | 895  | 0.333333 | 0.013986 | NET1     |
| 4672.929 | 5.406213 | -7068 | 7.45E-05 | 854  | 0.333333 | 0.012574 | HNRNPA3  |
| 3283.556 | 4.63705  | -7068 | 7.41E-05 | 794  | 0.333333 | 0.011531 | KHDRBS1  |
| 7102.175 | 8.05255  | -7068 | 7.46E-05 | 783  | 0.333333 | 0.01153  | CAPN9    |
| 6095.82  | 6.532891 | -7068 | 7.48E-05 | 874  | 0.333333 | 0.012966 | WEE1     |
| 6272.492 | 7.831893 | -7068 | 7.43E-05 | 750  | 0.333333 | 0.010633 | PDLIM4   |
| 19995.56 | 7.053701 | -7068 | 7.85E-05 | 1490 | 0.333333 | 0.023104 | ELOVL6   |
| 2949.094 | 9.162051 | -7068 | 7.30E-05 | 476  | 0.333333 | 0.006713 | GFER     |
| 6319.352 | 6.530112 | -7068 | 7.49E-05 | 882  | 0.25     | 0.013247 | ATP6V0E1 |
| 8096.537 | 7.817241 | -7068 | 7.50E-05 | 878  | 0.333333 | 0.012938 | UNC5B    |
| 5751.699 | 5.253453 | -7068 | 7.46E-05 | 942  | 0.333333 | 0.012781 | HSPA8    |
| 4558.613 | 5.882296 | -7068 | 7.45E-05 | 814  | 0.333333 | 0.012429 | NUP50    |
| 8361.895 | 6.033454 | -7068 | 7.58E-05 | 1081 | 0.333333 | 0.016585 | TPM4     |
| 10319.14 | 6.369694 | -7068 | 7.61E-05 | 1124 | 0.333333 | 0.016268 | LAMC2    |
| 4750.073 | 7.957583 | -7068 | 7.36E-05 | 646  | 0.333333 | 0.009047 | PF4V1    |
| 6403.608 | 5.640893 | -7068 | 7.52E-05 | 980  | 0.333333 | 0.014386 | IGFBP3   |
| 8791.469 | 6.709273 | -7068 | 7.55E-05 | 1010 | 0.333333 | 0.014742 | BAX      |
| 3451.448 | 11.06868 | -7068 | 7.25E-05 | 411  | 0.333333 | 0.004885 | B3GAT3   |
| 5278.204 | 6.612711 | -7068 | 7.43E-05 | 796  | 0.333333 | 0.011295 | NUP62    |
| 1301.52  | 11.01502 | -7068 | 7.18E-05 | 264  | 0.333333 | 0.003076 | CCDC57   |
| 3080.513 | 11.22755 | -7068 | 7.24E-05 | 382  | 0.333333 | 0.004264 | UCN      |
| 3488.489 | 6.940705 | -7068 | 7.36E-05 | 618  | 0.333333 | 0.009174 | PLXND1   |
| 6484.395 | 6.693691 | -7068 | 7.48E-05 | 868  | 0.333333 | 0.012842 | SKAP2    |
| 5974.511 | 8.79541  | -7068 | 7.40E-05 | 691  | 0.333333 | 0.010246 | LITAF    |
| 1585.305 | 5.353368 | -7068 | 7.27E-05 | 491  | 0.333333 | 0.007308 | PPAT     |
| 3133.347 | 6.724796 | -7068 | 7.35E-05 | 606  | 0.333333 | 0.009018 | CS       |
| 11064.56 | 7.260561 | -7068 | 7.61E-05 | 1075 | 0.333333 | 0.015693 | OLFM4    |
| 4155.88  | 6.116055 | -7068 | 7.39E-05 | 726  | 0.333333 | 0.010524 | UBE2D2   |
| 6161.054 | 7.31902  | -7068 | 7.46E-05 | 810  | 0.333333 | 0.012832 | CNIH3    |

|          |          |       |          |      |          |          |          |
|----------|----------|-------|----------|------|----------|----------|----------|
| 8472.938 | 12.24337 | -7068 | 7.35E-05 | 581  | 0.333333 | 0.008362 | TRO      |
| 6147.889 | 7.091937 | -7068 | 7.48E-05 | 835  | 0.333333 | 0.013108 | DIAPH2   |
| 8484.744 | 7.354057 | -7068 | 7.53E-05 | 940  | 0.333333 | 0.013319 | EBP      |
| 4771.482 | 4.757236 | -7068 | 7.43E-05 | 866  | 0.333333 | 0.01076  | DBF4     |
| 5005.615 | 10.77984 | -7068 | 7.32E-05 | 528  | 0.333333 | 0.007002 | CALCR    |
| 19330.21 | 6.789872 | -7068 | 7.82E-05 | 1496 | 0.333333 | 0.022717 | RSU1     |
| 2970.214 | 9.103383 | -7068 | 7.29E-05 | 470  | 0.333333 | 0.006458 | PTGER1   |
| 8385.26  | 7.99018  | -7068 | 7.47E-05 | 843  | 0.333333 | 0.011665 | SERPINB5 |
| 8795.413 | 6.432276 | -7068 | 7.58E-05 | 1053 | 0.333333 | 0.016381 | ETV1     |
| 2437.443 | 5.718567 | -7068 | 7.29E-05 | 547  | 0.25     | 0.006482 | ADH6     |
| 4215.04  | 8.199634 | -7068 | 7.35E-05 | 603  | 0.333333 | 0.008714 | HSPB3    |
| 2941.783 | 9.336696 | -7068 | 7.28E-05 | 462  | 0.333333 | 0.006634 | LDOC1    |
| 6278.492 | 6.421422 | -7068 | 7.47E-05 | 860  | 0.333333 | 0.011746 | CXCL2    |
| 4079.588 | 5.756477 | -7068 | 7.41E-05 | 759  | 0.333333 | 0.010758 | CHAF1A   |
| 11856.1  | 6.420428 | -7068 | 7.67E-05 | 1237 | 0.333333 | 0.018249 | ANXA2    |
| 5786.905 | 7.336907 | -7068 | 7.45E-05 | 792  | 0.333333 | 0.012055 | ABCC1    |
| 4038.37  | 9.762727 | -7068 | 7.30E-05 | 496  | 0.333333 | 0.006247 | RBP3     |
| 5160.331 | 7.7217   | -7068 | 7.42E-05 | 718  | 0.333333 | 0.010889 | SLC39A14 |
| 7471.127 | 6.685146 | -7068 | 7.53E-05 | 947  | 0.25     | 0.01473  | ABCA8    |
| 3686.469 | 6.613212 | -7068 | 7.37E-05 | 672  | 0.333333 | 0.0099   | CALR     |
| 11498.11 | 8.440075 | -7068 | 7.55E-05 | 970  | 0.333333 | 0.013643 | SDS      |
| 8977.598 | 6.080281 | -7068 | 7.59E-05 | 1101 | 0.333333 | 0.016396 | NRP1     |
| 1841.902 | 8.668849 | -7068 | 7.24E-05 | 380  | 0.333333 | 0.004907 | STK19    |
| 2731.337 | 7.991262 | -7068 | 7.31E-05 | 505  | 0.333333 | 0.007531 | CYB5R1   |
| 2165.258 | 7.388478 | -7068 | 7.27E-05 | 458  | 0.333333 | 0.006084 | SRRT     |
| 16438.87 | 7.644331 | -7068 | 7.71E-05 | 1264 | 0.333333 | 0.018935 | DHRS2    |
| 5212.755 | 8.44405  | -7068 | 7.34E-05 | 613  | 0.333333 | 0.008187 | DNA2     |
| 4099.054 | 9.627207 | -7068 | 7.30E-05 | 488  | 0.333333 | 0.006104 | RHO      |
| 3412.946 | 6.631214 | -7068 | 7.37E-05 | 640  | 0.333333 | 0.009931 | GNPMB    |
| 5383.224 | 6.482875 | -7068 | 7.48E-05 | 830  | 0.333333 | 0.013643 | MTUS1    |
| 2123.643 | 7.741262 | -7068 | 7.29E-05 | 456  | 0.333333 | 0.007216 | TUB      |
| 2940.932 | 8.106945 | -7068 | 7.29E-05 | 499  | 0.333333 | 0.006846 | SPDEF    |
| 3643.854 | 7.365633 | -7068 | 7.36E-05 | 624  | 0.333333 | 0.00947  | ENSA     |
| 983.1272 | 6.420334 | -7068 | 7.22E-05 | 356  | 0.333333 | 0.005633 | PLAA     |
| 4030.532 | 7.070969 | -7068 | 7.38E-05 | 668  | 0.333333 | 0.010119 | HUS1     |
| 13884.3  | 7.072089 | -7068 | 7.71E-05 | 1238 | 0.333333 | 0.019533 | PCLO     |
| 1713.342 | 5.132446 | -7068 | 7.27E-05 | 497  | 0.333333 | 0.006292 | NOP16    |
| 12584.11 | 6.387301 | -7068 | 7.67E-05 | 1266 | 0.333333 | 0.018568 | CHEK2    |
| 8721.656 | 7.36815  | -7068 | 7.53E-05 | 952  | 0.333333 | 0.014085 | PPP1R3C  |
| 9263.995 | 7.745406 | -7068 | 7.54E-05 | 948  | 0.333333 | 0.013137 | TKT      |
| 4555.376 | 7.276632 | -7068 | 7.42E-05 | 712  | 0.333333 | 0.011224 | PTGER4   |

|          |          |       |          |     |          |          |          |
|----------|----------|-------|----------|-----|----------|----------|----------|
| 5678.408 | 7.129961 | -7068 | 7.43E-05 | 767 | 0.333333 | 0.010802 | NR1I2    |
| 3965.472 | 7.480058 | -7068 | 7.38E-05 | 636 | 0.333333 | 0.009868 | ZC2HC1A  |
| 1101.121 | 9.84231  | -7068 | 7.18E-05 | 264 | 0.333333 | 0.003379 | GFRA2    |
| 3434.52  | 10.95685 | -7068 | 7.25E-05 | 405 | 0.333333 | 0.004741 | FOXC2    |
| 5021.28  | 7.689839 | -7068 | 7.42E-05 | 706 | 0.333333 | 0.011206 | SLITRK5  |
| 2729.718 | 9.731334 | -7068 | 7.27E-05 | 422 | 0.333333 | 0.006067 | MT4      |
| 3440.132 | 6.73477  | -7068 | 7.36E-05 | 633 | 0.333333 | 0.009301 | GK       |
| 2939.852 | 6.602926 | -7068 | 7.31E-05 | 585 | 0.333333 | 0.007764 | CASP2    |
| 966.8374 | 8.31431  | -7068 | 7.17E-05 | 276 | 0.333333 | 0.003638 | TLR6     |
| 1271.699 | 7.800399 | -7068 | 7.22E-05 | 348 | 0.333333 | 0.005257 | EIF2AK1  |
| 3615.095 | 7.314985 | -7068 | 7.35E-05 | 594 | 0.333333 | 0.007942 | CXCL5    |
| 3430.224 | 6.966257 | -7068 | 7.36E-05 | 627 | 0.333333 | 0.009162 | ITGA2B   |
| 4215.656 | 8.960375 | -7068 | 7.34E-05 | 568 | 0.333333 | 0.007767 | ALDOC    |
| 8559.622 | 7.680559 | -7068 | 7.54E-05 | 929 | 0.333333 | 0.014026 | BLVRA    |
| 6630.789 | 6.828163 | -7068 | 7.51E-05 | 887 | 0.333333 | 0.014012 | SBSPON   |
| 2473.61  | 8.554312 | -7068 | 7.28E-05 | 448 | 0.333333 | 0.0062   | RHBDF1   |
| 2526.547 | 5.76098  | -7068 | 7.30E-05 | 556 | 0.333333 | 0.006818 | NOC2L    |
| 3300.346 | 8.064557 | -7068 | 7.31E-05 | 533 | 0.333333 | 0.006907 | TNFRSF9  |
| 1559     | 8.771182 | -7068 | 7.22E-05 | 357 | 0.333333 | 0.005142 | PIN4     |
| 5314.46  | 9.345041 | -7068 | 7.37E-05 | 614 | 0.333333 | 0.008821 | SSX2IP   |
| 1969.412 | 8.378959 | -7068 | 7.24E-05 | 406 | 0.333333 | 0.005447 | RUNX2    |
| 3141.452 | 7.483946 | -7068 | 7.33E-05 | 561 | 0.333333 | 0.008465 | LAMB4    |
| 576.8927 | 9.410915 | -7068 | 7.13E-05 | 184 | 0.333333 | 0.002192 | POM121L2 |
| 1179.47  | 10.63795 | -7068 | 7.17E-05 | 254 | 0.333333 | 0.003055 | PDIA2    |
| 1335.547 | 6.006212 | -7068 | 7.26E-05 | 441 | 0.25     | 0.007437 | SLC24A5  |
| 6161.647 | 6.724064 | -7068 | 7.45E-05 | 834 | 0.333333 | 0.011589 | HNF4A    |
| 978.892  | 5.441593 | -7068 | 7.22E-05 | 383 | 0.333333 | 0.005976 | COX11    |
| 5273.615 | 8.879768 | -7068 | 7.37E-05 | 627 | 0.333333 | 0.008034 | ADAM15   |
| 3355.628 | 7.57141  | -7068 | 7.34E-05 | 577 | 0.333333 | 0.008711 | ELOVL2   |
| 2286.642 | 6.017121 | -7068 | 7.30E-05 | 537 | 0.333333 | 0.007401 | IDH3B    |
| 1626.596 | 8.403784 | -7068 | 7.23E-05 | 367 | 0.333333 | 0.004991 | CALCA    |
| 6074.551 | 6.744272 | -7068 | 7.48E-05 | 852 | 0.333333 | 0.012934 | ST8SIA4  |
| 1953.255 | 5.161916 | -7068 | 7.29E-05 | 551 | 0.333333 | 0.007386 | RPL22    |
| 6640.516 | 7.448517 | -7068 | 7.46E-05 | 833 | 0.333333 | 0.01212  | GGCX     |
| 5831.261 | 6.982606 | -7068 | 7.40E-05 | 744 | 0.333333 | 0.009776 | EFEMP2   |
| 1340.861 | 10.50161 | -7068 | 7.18E-05 | 271 | 0.333333 | 0.00337  | ASPHD1   |
| 2884.095 | 7.813493 | -7068 | 7.32E-05 | 524 | 0.333333 | 0.007715 | NTS      |
| 5866.149 | 8.329442 | -7068 | 7.38E-05 | 663 | 0.333333 | 0.008525 | KLK7     |
| 3308.797 | 8.324138 | -7068 | 7.31E-05 | 525 | 0.333333 | 0.007435 | MPZL2    |
| 5420.148 | 7.08103  | -7068 | 7.46E-05 | 780 | 0.333333 | 0.012183 | EPB41L1  |
| 8719.631 | 7.38218  | -7068 | 7.54E-05 | 949 | 0.333333 | 0.014671 | SERPINE2 |

|          |          |       |          |      |          |          |          |
|----------|----------|-------|----------|------|----------|----------|----------|
| 8990.292 | 7.853346 | -7068 | 7.53E-05 | 923  | 0.333333 | 0.013842 | JCHAIN   |
| 5902.538 | 7.600091 | -7068 | 7.44E-05 | 770  | 0.333333 | 0.011812 | SLC1A4   |
| 4078.975 | 5.659069 | -7068 | 7.41E-05 | 766  | 0.333333 | 0.010714 | CFLAR    |
| 7464.985 | 5.766638 | -7068 | 7.53E-05 | 1008 | 0.333333 | 0.014496 | FBLN5    |
| 6821.993 | 5.578057 | -7068 | 7.50E-05 | 976  | 0.333333 | 0.013173 | EXOSC2   |
| 7022.367 | 6.523576 | -7068 | 7.52E-05 | 929  | 0.333333 | 0.014107 | OSMR     |
| 1599.238 | 8.118197 | -7068 | 7.22E-05 | 346  | 0.333333 | 0.00406  | SLC12A3  |
| 3646.503 | 7.695215 | -7068 | 7.35E-05 | 593  | 0.333333 | 0.008439 | CBR3     |
| 3677.875 | 6.422182 | -7068 | 7.39E-05 | 679  | 0.333333 | 0.010403 | AREG     |
| 7519.68  | 7.015642 | -7068 | 7.52E-05 | 918  | 0.333333 | 0.013874 | CYP7B1   |
| 2980.965 | 8.625765 | -7068 | 7.29E-05 | 481  | 0.333333 | 0.00619  | TWF2     |
| 2224.496 | 9.026734 | -7068 | 7.24E-05 | 389  | 0.333333 | 0.005121 | IL11     |
| 2118.868 | 6.800734 | -7068 | 7.27E-05 | 473  | 0.333333 | 0.006238 | PRPF31   |
| 10301.62 | 5.63273  | -7068 | 7.64E-05 | 1232 | 0.333333 | 0.017624 | CENPF    |
| 2241.921 | 6.317363 | -7068 | 7.29E-05 | 517  | 0.25     | 0.007223 | PLN      |
| 2945.797 | 7.45059  | -7068 | 7.33E-05 | 550  | 0.333333 | 0.008242 | ERCC8    |
| 1855.422 | 7.624955 | -7068 | 7.25E-05 | 415  | 0.333333 | 0.006215 | KYAT3    |
| 883.8501 | 7.422438 | -7068 | 7.18E-05 | 284  | 0.333333 | 0.003702 | NPRL3    |
| 3348.653 | 7.284482 | -7068 | 7.34E-05 | 589  | 0.333333 | 0.008173 | IPO9     |
| 7218.645 | 6.456543 | -7068 | 7.52E-05 | 946  | 0.333333 | 0.013806 | SAT1     |
| 2600.843 | 7.427026 | -7068 | 7.31E-05 | 519  | 0.333333 | 0.007962 | ACSBG1   |
| 4005.472 | 9.199079 | -7068 | 7.33E-05 | 544  | 0.333333 | 0.008394 | SRR      |
| 9830.296 | 7.009347 | -7068 | 7.60E-05 | 1056 | 0.333333 | 0.016541 | HIP1     |
| 10196.7  | 22.20196 | -7068 | 7.32E-05 | 523  | 0.333333 | 0.007977 | UGT8     |
| 9509.587 | 7.588253 | -7068 | 7.50E-05 | 946  | 0.333333 | 0.013123 | RBPMS    |
| 7800.864 | 6.606498 | -7068 | 7.55E-05 | 973  | 0.333333 | 0.015295 | FAM110B  |
| 292.8149 | 10.29821 | -7068 | 7.09E-05 | 138  | 0.333333 | 0.001914 | FAM149B1 |
| 2397.652 | 6.653585 | -7068 | 7.27E-05 | 492  | 0.333333 | 0.00584  | SRD5A2   |
| 20756.25 | 6.749291 | -7068 | 7.86E-05 | 1549 | 0.333333 | 0.02356  | MSR1     |
| 6522.291 | 7.324109 | -7068 | 7.49E-05 | 841  | 0.333333 | 0.013349 | C11orf80 |
| 3717.631 | 6.626027 | -7068 | 7.39E-05 | 673  | 0.333333 | 0.010022 | TSC22D3  |
| 11730.97 | 6.782156 | -7068 | 7.65E-05 | 1183 | 0.333333 | 0.017508 | ACACA    |
| 3839.643 | 6.706605 | -7068 | 7.38E-05 | 659  | 0.333333 | 0.009449 | AIF1     |
| 3489.301 | 4.555476 | -7068 | 7.41E-05 | 817  | 0.333333 | 0.011385 | PRKDC    |
| 2485.085 | 10.98753 | -7068 | 7.22E-05 | 351  | 0.333333 | 0.004298 | OGFR     |
| 17547.72 | 6.653121 | -7068 | 7.79E-05 | 1449 | 0.333333 | 0.021488 | MKI67    |
| 3950.773 | 5.829084 | -7068 | 7.40E-05 | 756  | 0.333333 | 0.010928 | SMC1A    |
| 2366.686 | 7.020491 | -7068 | 7.32E-05 | 522  | 0.25     | 0.008336 | LGR5     |
| 3059.536 | 6.845867 | -7068 | 7.36E-05 | 609  | 0.333333 | 0.009978 | PHTF2    |
| 5929.028 | 7.054203 | -7068 | 7.45E-05 | 806  | 0.333333 | 0.012147 | LOXL2    |
| 3612.414 | 5.953635 | -7068 | 7.33E-05 | 668  | 0.333333 | 0.007793 | RXRA     |

|          |          |       |          |      |          |          |          |
|----------|----------|-------|----------|------|----------|----------|----------|
| 2096.806 | 8.698794 | -7068 | 7.26E-05 | 415  | 0.333333 | 0.005623 | ZBTB7A   |
| 2171.912 | 8.087532 | -7068 | 7.28E-05 | 448  | 0.333333 | 0.006658 | HIRIP3   |
| 8576.977 | 9.113887 | -7068 | 7.46E-05 | 800  | 0.333333 | 0.011588 | PDE6B    |
| 5057.648 | 9.555303 | -7068 | 7.34E-05 | 591  | 0.333333 | 0.008502 | RBP1     |
| 2140.151 | 6.539842 | -7068 | 7.30E-05 | 510  | 0.333333 | 0.008019 | CHTOP    |
| 4074.716 | 8.540028 | -7068 | 7.32E-05 | 554  | 0.333333 | 0.007201 | MT3      |
| 5038.124 | 6.523011 | -7068 | 7.44E-05 | 786  | 0.333333 | 0.011863 | IFI44    |
| 4478.415 | 4.886934 | -7068 | 7.43E-05 | 847  | 0.333333 | 0.010839 | GIN51    |
| 6335.02  | 7.384314 | -7068 | 7.47E-05 | 817  | 0.333333 | 0.012519 | RANBP9   |
| 3867.247 | 8.668735 | -7068 | 7.34E-05 | 565  | 0.333333 | 0.008224 | NPC1     |
| 16827.29 | 6.906079 | -7068 | 7.76E-05 | 1366 | 0.333333 | 0.020949 | ATP6AP2  |
| 2986.087 | 6.887252 | -7068 | 7.34E-05 | 587  | 0.333333 | 0.008789 | CDKN1C   |
| 4799.837 | 7.398413 | -7068 | 7.42E-05 | 706  | 0.333333 | 0.010758 | SLC12A4  |
| 2449.405 | 9.263035 | -7068 | 7.26E-05 | 417  | 0.333333 | 0.006289 | ARMCX4   |
| 1874.09  | 9.111224 | -7068 | 7.21E-05 | 330  | 0.333333 | 0.003771 | RS1      |
| 4759.357 | 7.904653 | -7068 | 7.38E-05 | 656  | 0.333333 | 0.00952  | CDHR1    |
| 6413.569 | 8.004843 | -7068 | 7.42E-05 | 727  | 0.333333 | 0.009766 | CCL20    |
| 2601.722 | 8.439872 | -7068 | 7.29E-05 | 462  | 0.333333 | 0.006107 | AATK     |
| 3736.332 | 7.906672 | -7068 | 7.34E-05 | 585  | 0.333333 | 0.008465 | SEMA4F   |
| 2323.586 | 8.922711 | -7068 | 7.27E-05 | 432  | 0.25     | 0.006582 | TRAF3IP1 |
| 11432.2  | 7.105818 | -7068 | 7.63E-05 | 1121 | 0.333333 | 0.017078 | PLD1     |
| 3573.35  | 7.173573 | -7068 | 7.35E-05 | 613  | 0.333333 | 0.008528 | LDLR     |
| 3439.407 | 8.453242 | -7068 | 7.31E-05 | 526  | 0.333333 | 0.007463 | SLC5A12  |
| 3442.271 | 6.187823 | -7068 | 7.35E-05 | 644  | 0.333333 | 0.008379 | POLR2L   |
| 1944.221 | 11.16398 | -7068 | 7.22E-05 | 336  | 0.25     | 0.004801 | ZSCAN12  |
| 3509.625 | 8.419048 | -7068 | 7.32E-05 | 546  | 0.333333 | 0.007474 | ABCF2    |
| 6252.093 | 6.904578 | -7068 | 7.44E-05 | 808  | 0.333333 | 0.010753 | MT1G     |
| 4628.13  | 8.974503 | -7068 | 7.36E-05 | 596  | 0.333333 | 0.008499 | SEPHS2   |
| 5551.271 | 7.644317 | -7068 | 7.41E-05 | 720  | 0.333333 | 0.010323 | KCNJ8    |
| 5672.408 | 7.343814 | -7068 | 7.42E-05 | 757  | 0.333333 | 0.010264 | CDT1     |
| 5226.65  | 6.990057 | -7068 | 7.45E-05 | 773  | 0.333333 | 0.011856 | COL4A3   |
| 15173.2  | 7.758911 | -7068 | 7.68E-05 | 1211 | 0.333333 | 0.017864 | GLRX3    |
| 89.14807 | 7.134292 | -7068 | 7.01E-05 | 96   | 0.25     | 0.001371 | HSPA1B   |
| 3559.08  | 7.705914 | -7068 | 7.33E-05 | 559  | 0.333333 | 0.007515 | COX6A1   |
| 5072.648 | 6.522445 | -7068 | 7.42E-05 | 778  | 0.333333 | 0.010994 | RIPK2    |
| 3867.902 | 6.682047 | -7068 | 7.38E-05 | 670  | 0.333333 | 0.009858 | RGS1     |
| 12940.51 | 9.531923 | -7068 | 7.53E-05 | 932  | 0.333333 | 0.014299 | MEOX2    |
| 1754.468 | 8.557981 | -7068 | 7.24E-05 | 376  | 0.333333 | 0.005016 | RASL10A  |
| 1081.126 | 6.329548 | -7068 | 7.20E-05 | 354  | 0.333333 | 0.005077 | KDM5A    |
| 1228.96  | 7.614206 | -7068 | 7.21E-05 | 351  | 0.25     | 0.005098 | TOB2     |
| 5750.702 | 8.327994 | -7068 | 7.42E-05 | 714  | 0.333333 | 0.010846 | ABCD4    |

|          |          |       |          |      |          |          |          |
|----------|----------|-------|----------|------|----------|----------|----------|
| 3187.819 | 7.975729 | -7068 | 7.33E-05 | 546  | 0.333333 | 0.008311 | CLMN     |
| 4149.198 | 6.485455 | -7068 | 7.40E-05 | 701  | 0.333333 | 0.01016  | SAMM50   |
| 2178.221 | 6.61577  | -7068 | 7.29E-05 | 510  | 0.333333 | 0.007265 | DAG1     |
| 7488.207 | 6.576652 | -7068 | 7.51E-05 | 938  | 0.333333 | 0.01313  | PLAUR    |
| 4860.009 | 8.816359 | -7068 | 7.36E-05 | 614  | 0.333333 | 0.008462 | LMAN2    |
| 1833.404 | 9.923641 | -7068 | 7.21E-05 | 324  | 0.333333 | 0.003765 | PDX1     |
| 6012.438 | 7.755413 | -7068 | 7.44E-05 | 763  | 0.333333 | 0.011109 | FADS2    |
| 2646.229 | 7.475317 | -7068 | 7.29E-05 | 501  | 0.333333 | 0.006419 | ERCC2    |
| 4509.578 | 7.350116 | -7068 | 7.39E-05 | 660  | 0.333333 | 0.009728 | PGAM1    |
| 10479.69 | 5.787067 | -7068 | 7.65E-05 | 1223 | 0.333333 | 0.018065 | KIF11    |
| 4064.473 | 8.257978 | -7068 | 7.35E-05 | 580  | 0.333333 | 0.008437 | CHRD1    |
| 12469.68 | 8.118096 | -7068 | 7.60E-05 | 1039 | 0.333333 | 0.014984 | PDZK1IP1 |
| 3863.134 | 8.07846  | -7068 | 7.36E-05 | 603  | 0.333333 | 0.009201 | RPL39L   |
| 3731.611 | 9.653754 | -7068 | 7.30E-05 | 502  | 0.333333 | 0.006261 | HTRA2    |
| 7912.983 | 7.419778 | -7068 | 7.51E-05 | 909  | 0.333333 | 0.013672 | ACACB    |
| 3581.647 | 7.508844 | -7068 | 7.35E-05 | 599  | 0.333333 | 0.008655 | CDC42EP2 |
| 4508.373 | 6.417169 | -7068 | 7.40E-05 | 718  | 0.333333 | 0.009673 | RAD54L   |
| 5262.091 | 8.204961 | -7068 | 7.39E-05 | 672  | 0.333333 | 0.009514 | TXN2     |
| 11150.22 | 6.773998 | -7068 | 7.63E-05 | 1132 | 0.333333 | 0.016544 | SLC27A2  |
| 8245.549 | 7.031004 | -7068 | 7.50E-05 | 908  | 0.333333 | 0.012216 | S100A8   |
| 8169.587 | 6.912426 | -7068 | 7.50E-05 | 930  | 0.333333 | 0.013155 | DSP      |
| 2667.11  | 7.737079 | -7068 | 7.29E-05 | 496  | 0.333333 | 0.006864 | HFE      |
| 12785.64 | 6.804803 | -7068 | 7.69E-05 | 1222 | 0.333333 | 0.018982 | WWC1     |
| 1675.283 | 7.755132 | -7068 | 7.25E-05 | 398  | 0.333333 | 0.006014 | RSAD2    |
| 12095.5  | 6.855542 | -7068 | 7.64E-05 | 1172 | 0.333333 | 0.017293 | LAMA1    |
| 5997.048 | 7.888517 | -7068 | 7.42E-05 | 716  | 0.333333 | 0.009357 | FCN3     |
| 3770.601 | 8.442099 | -7068 | 7.33E-05 | 567  | 0.333333 | 0.008338 | HRK      |
| 5834.362 | 6.090736 | -7068 | 7.49E-05 | 892  | 0.333333 | 0.013278 | RBM8A    |
| 4099.95  | 8.105421 | -7068 | 7.35E-05 | 592  | 0.333333 | 0.008158 | RRAD     |
| 13511.69 | 7.126091 | -7068 | 7.70E-05 | 1229 | 0.333333 | 0.019486 | SOX4     |
| 6700.396 | 6.893636 | -7068 | 7.49E-05 | 874  | 0.333333 | 0.013355 | TFPI     |
| 2149.42  | 8.009901 | -7068 | 7.26E-05 | 433  | 0.333333 | 0.006262 | PIGH     |
| 4251.94  | 7.218933 | -7068 | 7.40E-05 | 676  | 0.333333 | 0.009976 | MYL12B   |
| 6155.44  | 7.058561 | -7068 | 7.48E-05 | 836  | 0.333333 | 0.013227 | ABCG1    |
| 6981.413 | 8.114449 | -7068 | 7.45E-05 | 777  | 0.333333 | 0.011349 | SLC15A1  |
| 9881.433 | 7.05626  | -7068 | 7.59E-05 | 1062 | 0.333333 | 0.016067 | HGF      |
| 4446.058 | 6.055363 | -7068 | 7.44E-05 | 761  | 0.333333 | 0.01128  | NCAPH    |
| 6600.167 | 8.017948 | -7068 | 7.43E-05 | 748  | 0.333333 | 0.009913 | SOX10    |
| 2223.476 | 9.262213 | -7068 | 7.25E-05 | 410  | 0.333333 | 0.005945 | TGIF2    |
| 3676.972 | 9.775874 | -7068 | 7.23E-05 | 436  | 0.333333 | 0.004786 | ZNF135   |
| 4745.5   | 8.153356 | -7068 | 7.33E-05 | 598  | 0.333333 | 0.007274 | NDUFS7   |

|          |          |       |          |      |          |          |            |
|----------|----------|-------|----------|------|----------|----------|------------|
| 4033.456 | 8.47736  | -7068 | 7.34E-05 | 578  | 0.333333 | 0.008022 | PLPP2      |
| 899.8988 | 8.994193 | -7068 | 7.16E-05 | 261  | 0.25     | 0.003622 | TTC9       |
| 3310.243 | 8.47847  | -7068 | 7.32E-05 | 526  | 0.333333 | 0.007324 | ST6GALNAC2 |
| 2946.122 | 7.548807 | -7068 | 7.33E-05 | 546  | 0.333333 | 0.008449 | PRSS23     |
| 1512.219 | 6.651661 | -7068 | 7.27E-05 | 432  | 0.333333 | 0.006931 | ASAH1      |
| 3702.395 | 8.083017 | -7068 | 7.35E-05 | 584  | 0.333333 | 0.008465 | CPT1A      |
| 10452.02 | 6.727001 | -7068 | 7.61E-05 | 1111 | 0.333333 | 0.017051 | AKAP13     |
| 4543.735 | 4.892678 | -7068 | 7.44E-05 | 866  | 0.333333 | 0.011688 | THBS1      |
| 3399.312 | 9.486529 | -7068 | 7.30E-05 | 483  | 0.333333 | 0.006714 | RAB27B     |
| 13045.13 | 6.799203 | -7068 | 7.67E-05 | 1218 | 0.333333 | 0.017756 | TRIB1      |
| 2680.315 | 6.810848 | -7068 | 7.29E-05 | 519  | 0.333333 | 0.006791 | NEFL       |
| 3556.729 | 7.16024  | -7068 | 7.34E-05 | 598  | 0.333333 | 0.008401 | IL4        |
| 18185.29 | 6.418967 | -7068 | 7.88E-05 | 1536 | 0.333333 | 0.024558 | MECOM      |
| 2021.636 | 7.686793 | -7068 | 7.24E-05 | 400  | 0.333333 | 0.004755 | FCAR       |
| 2707.134 | 7.175923 | -7068 | 7.31E-05 | 537  | 0.333333 | 0.007696 | CDK12      |
| 3367.037 | 7.564663 | -7068 | 7.34E-05 | 580  | 0.333333 | 0.008625 | DDX52      |
| 1634.01  | 11.13915 | -7068 | 7.20E-05 | 290  | 0.333333 | 0.003882 | USP2       |
| 11059.77 | 7.078341 | -7068 | 7.63E-05 | 1113 | 0.333333 | 0.017557 | KPNA4      |
| 1338.261 | 7.930652 | -7068 | 7.21E-05 | 347  | 0.333333 | 0.004756 | BAIAP2     |
| 4323.883 | 8.410275 | -7068 | 7.37E-05 | 609  | 0.333333 | 0.00904  | MCF2L      |
| 6002.101 | 5.753556 | -7068 | 7.49E-05 | 930  | 0.333333 | 0.013184 | CDC25A     |
| 4687.851 | 11.98969 | -7068 | 7.27E-05 | 450  | 0.333333 | 0.005755 | P2RY10     |
| 3138.598 | 6.229985 | -7068 | 7.36E-05 | 635  | 0.333333 | 0.009634 | RAD1       |
| 9779.17  | 6.018886 | -7068 | 7.64E-05 | 1166 | 0.333333 | 0.017972 | MERTK      |
| 7936.429 | 7.499584 | -7068 | 7.49E-05 | 863  | 0.333333 | 0.011941 | VSIG4      |
| 9428.426 | 7.303427 | -7068 | 7.55E-05 | 993  | 0.333333 | 0.014613 | ABCC3      |
| 4655.013 | 9.006739 | -7068 | 7.35E-05 | 578  | 0.333333 | 0.007528 | DHRS1      |
| 6306.762 | 8.494589 | -7068 | 7.39E-05 | 707  | 0.333333 | 0.009618 | SREBF1     |
| 8373.018 | 5.692433 | -7068 | 7.58E-05 | 1107 | 0.333333 | 0.016326 | CPSF6      |
| 5363.253 | 7.752348 | -7068 | 7.41E-05 | 712  | 0.333333 | 0.010356 | EFNA1      |
| 5600.562 | 7.611592 | -7068 | 7.41E-05 | 723  | 0.333333 | 0.01003  | OASL       |
| 5881.256 | 6.921978 | -7068 | 7.47E-05 | 819  | 0.333333 | 0.012712 | SLC16A7    |
| 9235.768 | 6.674922 | -7068 | 7.54E-05 | 1036 | 0.333333 | 0.014213 | CEBPB      |
| 5463.363 | 6.216699 | -7068 | 7.44E-05 | 848  | 0.333333 | 0.011791 | ATF3       |
| 8151.113 | 7.889139 | -7068 | 7.47E-05 | 835  | 0.333333 | 0.011433 | CLCA2      |
| 1540.189 | 6.11884  | -7068 | 7.27E-05 | 455  | 0.333333 | 0.007465 | SMCHD1     |
| 4444.085 | 8.467828 | -7068 | 7.37E-05 | 625  | 0.333333 | 0.009565 | KIF1C      |
| 4163.488 | 9.194968 | -7068 | 7.34E-05 | 554  | 0.333333 | 0.007742 | CDKN2B     |
| 781.0953 | 8.856152 | -7068 | 7.17E-05 | 241  | 0.333333 | 0.003146 | BICDL1     |
| 3392.107 | 8.538796 | -7068 | 7.31E-05 | 522  | 0.333333 | 0.006955 | TNFRSF10C  |
| 2470.71  | 7.952602 | -7068 | 7.29E-05 | 482  | 0.333333 | 0.007322 | ATP5S      |

|          |          |       |          |      |          |          |           |
|----------|----------|-------|----------|------|----------|----------|-----------|
| 4615.802 | 8.890544 | -7068 | 7.36E-05 | 598  | 0.333333 | 0.008355 | ENDOG     |
| 7871.824 | 6.31716  | -7068 | 7.52E-05 | 959  | 0.333333 | 0.013391 | C1R       |
| 3721.474 | 7.74451  | -7068 | 7.35E-05 | 590  | 0.333333 | 0.008208 | CYB5R3    |
| 3828.407 | 6.897393 | -7068 | 7.36E-05 | 654  | 0.333333 | 0.009228 | TNFRSF10B |
| 1137.228 | 7.957092 | -7068 | 7.20E-05 | 321  | 0.25     | 0.004804 | FRMD4B    |
| 4951.771 | 7.36855  | -7068 | 7.41E-05 | 713  | 0.25     | 0.010701 | COBLL1    |
| 1618.293 | 6.506518 | -7068 | 7.26E-05 | 439  | 0.333333 | 0.006571 | CD300A    |
| 4962.036 | 6.585447 | -7068 | 7.40E-05 | 737  | 0.333333 | 0.010144 | FCGR3A    |
| 2004.342 | 8.349462 | -7068 | 7.27E-05 | 415  | 0.333333 | 0.00625  | RASGRP2   |
| 2494.985 | 7.151828 | -7068 | 7.28E-05 | 503  | 0.333333 | 0.006262 | TFR2      |
| 2663.212 | 7.860865 | -7068 | 7.27E-05 | 476  | 0.333333 | 0.005921 | ATP5J2    |
| 3490.079 | 6.387715 | -7068 | 7.37E-05 | 660  | 0.333333 | 0.009977 | CAV2      |
| 2100.839 | 8.737864 | -7068 | 7.26E-05 | 408  | 0.333333 | 0.006165 | DMXL2     |
| 3735.934 | 9.143429 | -7068 | 7.32E-05 | 528  | 0.333333 | 0.007688 | MPL       |
| 4489.325 | 7.293038 | -7068 | 7.38E-05 | 674  | 0.333333 | 0.009407 | TAPBP     |
| 3303.924 | 8.910238 | -7068 | 7.30E-05 | 508  | 0.333333 | 0.006953 | TAP2      |
| 5645.817 | 6.838636 | -7068 | 7.45E-05 | 804  | 0.333333 | 0.011743 | TAGLN2    |
| 1578.3   | 9.170658 | -7068 | 7.21E-05 | 336  | 0.333333 | 0.004538 | RAPGEF3   |
| 2959.285 | 7.193261 | -7068 | 7.31E-05 | 543  | 0.333333 | 0.007485 | ACOT13    |
| 3583.117 | 7.263437 | -7068 | 7.35E-05 | 613  | 0.333333 | 0.008899 | ABLIM3    |
| 2832.864 | 7.608916 | -7068 | 7.31E-05 | 521  | 0.333333 | 0.007541 | ARHGEF5   |
| 1884.713 | 8.913168 | -7068 | 7.25E-05 | 388  | 0.333333 | 0.005822 | PNMA2     |
| 19030.99 | 6.857749 | -7068 | 7.84E-05 | 1487 | 0.333333 | 0.023312 | SH3PXD2A  |
| 2862.794 | 9.492744 | -7068 | 7.28E-05 | 439  | 0.333333 | 0.005599 | CAPN5     |
| 1613.001 | 9.411685 | -7068 | 7.21E-05 | 327  | 0.333333 | 0.004223 | SURF2     |
| 11400.89 | 6.809941 | -7068 | 7.65E-05 | 1156 | 0.333333 | 0.018112 | TIPARP    |
| 5611.097 | 7.154376 | -7068 | 7.42E-05 | 764  | 0.333333 | 0.010991 | PDGFB     |
| 2632.966 | 9.483925 | -7068 | 7.24E-05 | 410  | 0.333333 | 0.004975 | ACAN      |
| 5457.715 | 6.837909 | -7068 | 7.42E-05 | 773  | 0.333333 | 0.011413 | ANP32E    |
| 2552.042 | 9.625697 | -7068 | 7.26E-05 | 412  | 0.25     | 0.005922 | PEG3      |
| 3824.118 | 8.736686 | -7068 | 7.30E-05 | 520  | 0.333333 | 0.006529 | PKP3      |
| 3071.783 | 8.886238 | -7068 | 7.30E-05 | 486  | 0.333333 | 0.006524 | SLC37A4   |
| 3514.859 | 10.49798 | -7068 | 7.28E-05 | 452  | 0.333333 | 0.006024 | OVOL1     |
| 4979.242 | 7.864132 | -7068 | 7.39E-05 | 669  | 0.333333 | 0.009395 | AKR1B10   |
| 2827.789 | 8.508378 | -7068 | 7.29E-05 | 469  | 0.333333 | 0.006167 | TMPRSS6   |
| 3678.016 | 7.819744 | -7068 | 7.37E-05 | 606  | 0.333333 | 0.009252 | FSCN1     |
| 4372.322 | 8.112898 | -7068 | 7.36E-05 | 614  | 0.333333 | 0.00885  | NPR2      |
| 6594.832 | 6.914055 | -7068 | 7.51E-05 | 878  | 0.333333 | 0.014035 | CPNE3     |
| 1726.162 | 7.773801 | -7068 | 7.26E-05 | 420  | 0.333333 | 0.006437 | ATXN3     |
| 1782.515 | 7.628832 | -7068 | 7.25E-05 | 419  | 0.333333 | 0.006402 | MACF1     |
| 2567.148 | 7.611934 | -7068 | 7.28E-05 | 484  | 0.333333 | 0.006836 | PDGFA     |



|          |          |       |          |      |          |          |          |
|----------|----------|-------|----------|------|----------|----------|----------|
| 7062.492 | 7.370942 | -7068 | 7.48E-05 | 852  | 0.333333 | 0.012723 | TP63     |
| 3463.062 | 6.945312 | -7068 | 7.34E-05 | 607  | 0.333333 | 0.00845  | CHI3L1   |
| 3408.536 | 6.413715 | -7068 | 7.36E-05 | 648  | 0.333333 | 0.00932  | ATP6V1D  |
| 535.3883 | 11.80169 | -7068 | 7.09E-05 | 151  | 0.333333 | 0.001655 | CCL15    |
| 4671.521 | 7.583291 | -7068 | 7.40E-05 | 687  | 0.333333 | 0.010337 | TPM3     |
| 2942.357 | 7.757625 | -7068 | 7.30E-05 | 522  | 0.333333 | 0.006765 | SHB      |
| 4766.566 | 6.906831 | -7068 | 7.43E-05 | 747  | 0.333333 | 0.012009 | RNF115   |
| 1369.721 | 7.162704 | -7068 | 7.24E-05 | 394  | 0.333333 | 0.006227 | GTF2H5   |
| 2620.369 | 8.191367 | -7068 | 7.30E-05 | 491  | 0.333333 | 0.007664 | AVIL     |
| 2531.793 | 7.411198 | -7068 | 7.31E-05 | 520  | 0.333333 | 0.007905 | SYNJ2    |
| 1192.536 | 7.779435 | -7068 | 7.21E-05 | 323  | 0.333333 | 0.00447  | PRRC2B   |
| 1952.285 | 6.627899 | -7068 | 7.27E-05 | 476  | 0.333333 | 0.006607 | LAMP1    |
| 6972.416 | 6.161212 | -7068 | 7.49E-05 | 915  | 0.333333 | 0.012177 | TUBB4B   |
| 2485.6   | 7.43044  | -7068 | 7.31E-05 | 508  | 0.333333 | 0.007681 | SLC7A8   |
| 4886.97  | 7.531265 | -7068 | 7.40E-05 | 697  | 0.333333 | 0.010503 | HSPA2    |
| 1658.038 | 6.790118 | -7068 | 7.27E-05 | 447  | 0.333333 | 0.007192 | EIF1     |
| 2302.849 | 8.196953 | -7068 | 7.26E-05 | 444  | 0.25     | 0.006174 | MATN3    |
| 3382.551 | 8.376673 | -7068 | 7.31E-05 | 532  | 0.333333 | 0.007271 | NUPR1    |
| 6530.257 | 6.059139 | -7068 | 7.49E-05 | 922  | 0.333333 | 0.013221 | IGFBP5   |
| 3916.155 | 9.125962 | -7068 | 7.31E-05 | 527  | 0.333333 | 0.007557 | MIA      |
| 4059.489 | 6.533766 | -7068 | 7.42E-05 | 717  | 0.333333 | 0.011355 | TM4SF1   |
| 4912.539 | 7.296002 | -7068 | 7.41E-05 | 728  | 0.333333 | 0.011055 | BCAT1    |
| 2392.316 | 8.251461 | -7068 | 7.27E-05 | 447  | 0.333333 | 0.006062 | FAM89B   |
| 6314.919 | 5.56777  | -7068 | 7.49E-05 | 942  | 0.333333 | 0.012962 | COL6A1   |
| 5354.144 | 6.542919 | -7068 | 7.42E-05 | 793  | 0.333333 | 0.010904 | SOCS1    |
| 1195.681 | 8.928397 | -7068 | 7.19E-05 | 289  | 0.333333 | 0.003735 | TMEM259  |
| 5992.43  | 7.573639 | -7068 | 7.46E-05 | 787  | 0.333333 | 0.012324 | SLC6A6   |
| 4368.116 | 7.648515 | -7068 | 7.36E-05 | 634  | 0.333333 | 0.008646 | DDX27    |
| 8296.554 | 7.149051 | -7068 | 7.54E-05 | 953  | 0.333333 | 0.014283 | STC1     |
| 1945.682 | 9.880504 | -7068 | 7.22E-05 | 355  | 0.333333 | 0.004657 | SCAMP5   |
| 1236.91  | 7.588173 | -7068 | 7.20E-05 | 335  | 0.25     | 0.004644 | SEMA6A   |
| 4071.245 | 7.242223 | -7068 | 7.39E-05 | 661  | 0.333333 | 0.010256 | CPM      |
| 2506.073 | 8.249477 | -7068 | 7.26E-05 | 433  | 0.333333 | 0.005276 | KLK2     |
| 13212.94 | 11.55153 | -7068 | 7.49E-05 | 847  | 0.333333 | 0.011359 | ZNF467   |
| 2923.49  | 8.75525  | -7068 | 7.29E-05 | 469  | 0.25     | 0.006709 | TNN      |
| 11701.23 | 6.905317 | -7068 | 7.62E-05 | 1142 | 0.333333 | 0.016748 | EPAS1    |
| 8337.894 | 6.40354  | -7068 | 7.56E-05 | 1016 | 0.333333 | 0.015373 | RHOQ     |
| 3155.546 | 7.429006 | -7068 | 7.34E-05 | 566  | 0.333333 | 0.008536 | TMEM97   |
| 1796.646 | 5.410782 | -7068 | 7.29E-05 | 529  | 0.333333 | 0.007765 | NBN      |
| 1964.782 | 6.373782 | -7068 | 7.28E-05 | 459  | 0.333333 | 0.006161 | HLA-DQB1 |
| 2368.579 | 7.493818 | -7068 | 7.28E-05 | 476  | 0.333333 | 0.006905 | P2RY14   |

|          |          |       |          |      |          |          |          |
|----------|----------|-------|----------|------|----------|----------|----------|
| 3531.297 | 6.642847 | -7068 | 7.35E-05 | 627  | 0.333333 | 0.00893  | IRAK3    |
| 3437.044 | 7.575042 | -7068 | 7.36E-05 | 605  | 0.333333 | 0.009803 | PLPP1    |
| 2893.871 | 4.905827 | -7068 | 7.35E-05 | 676  | 0.333333 | 0.00876  | CD68     |
| 3602.009 | 7.695086 | -7068 | 7.35E-05 | 587  | 0.333333 | 0.008211 | CAPG     |
| 4399.924 | 8.410963 | -7068 | 7.33E-05 | 585  | 0.333333 | 0.007521 | CALML3   |
| 2295.216 | 9.347619 | -7068 | 7.24E-05 | 391  | 0.333333 | 0.004836 | CYB561D2 |
| 7484.032 | 8.505727 | -7068 | 7.47E-05 | 812  | 0.333333 | 0.011932 | GUSB     |
| 2587.506 | 7.547095 | -7068 | 7.29E-05 | 499  | 0.333333 | 0.00724  | HEPH     |
| 3352.403 | 8.389883 | -7068 | 7.31E-05 | 517  | 0.333333 | 0.006906 | HPGDS    |
| 10304.58 | 7.143532 | -7068 | 7.58E-05 | 1063 | 0.333333 | 0.015344 | E2F2     |
| 4985.729 | 7.009212 | -7068 | 7.42E-05 | 749  | 0.333333 | 0.010988 | TGM2     |
| 17332.85 | 15.79693 | -7068 | 7.35E-05 | 614  | 0.333333 | 0.009091 | ATP5L    |
| 2974.7   | 8.224252 | -7068 | 7.30E-05 | 500  | 0.333333 | 0.007294 | PER2     |
| 7205.374 | 6.350473 | -7068 | 7.55E-05 | 965  | 0.333333 | 0.01535  | PENK     |
| 1457.088 | 9.90269  | -7068 | 7.21E-05 | 309  | 0.333333 | 0.004286 | RASSF8   |
| 13471.44 | 8.891403 | -7068 | 7.60E-05 | 1039 | 0.333333 | 0.015961 | GPR135   |
| 3826.433 | 8.751961 | -7068 | 7.34E-05 | 552  | 0.333333 | 0.008138 | RGS20    |
| 7836.85  | 6.719862 | -7068 | 7.53E-05 | 958  | 0.333333 | 0.014548 | EMP1     |
| 10604.54 | 6.176734 | -7068 | 7.63E-05 | 1176 | 0.333333 | 0.017569 | TNC      |
| 8442.049 | 7.743865 | -7068 | 7.50E-05 | 875  | 0.333333 | 0.012419 | SPINT1   |
| 1684.952 | 7.22805  | -7068 | 7.25E-05 | 401  | 0.333333 | 0.005288 | ILVBL    |
| 2498.961 | 7.315141 | -7068 | 7.31E-05 | 512  | 0.333333 | 0.0073   | COMT     |
| 7692.713 | 7.680832 | -7068 | 7.51E-05 | 874  | 0.333333 | 0.013708 | OLFML2A  |
| 3631.657 | 7.482524 | -7068 | 7.37E-05 | 605  | 0.333333 | 0.009118 | AKR1C3   |
| 2007.316 | 9.330668 | -7068 | 7.22E-05 | 377  | 0.333333 | 0.00504  | POU5F1   |
| 4603.86  | 8.549874 | -7068 | 7.38E-05 | 627  | 0.333333 | 0.009595 | TCF20    |
| 3144.726 | 8.765303 | -7068 | 7.28E-05 | 474  | 0.333333 | 0.005975 | ATP2C2   |
| 4124.378 | 8.427829 | -7068 | 7.35E-05 | 590  | 0.333333 | 0.0083   | QPR1     |
| 3621.857 | 6.710496 | -7068 | 7.36E-05 | 631  | 0.333333 | 0.009293 | SRSF8    |
| 1837.545 | 6.756042 | -7068 | 7.28E-05 | 454  | 0.333333 | 0.007066 | JMJD1C   |
| 3461.535 | 7.15793  | -7068 | 7.37E-05 | 629  | 0.333333 | 0.009963 | PAPSS2   |
| 6037.044 | 6.833759 | -7068 | 7.45E-05 | 817  | 0.333333 | 0.011281 | TDO2     |
| 4942.844 | 7.70567  | -7068 | 7.40E-05 | 696  | 0.333333 | 0.010346 | DDIT4    |
| 5044.251 | 7.337925 | -7068 | 7.43E-05 | 728  | 0.333333 | 0.011209 | EPM2A    |
| 2561.811 | 7.925131 | -7068 | 7.30E-05 | 488  | 0.333333 | 0.007231 | MYO7A    |
| 2731.794 | 5.848809 | -7068 | 7.31E-05 | 587  | 0.333333 | 0.007101 | SLCO1B1  |
| 3882.844 | 6.410681 | -7068 | 7.37E-05 | 689  | 0.333333 | 0.009958 | HBEGF    |
| 4887.475 | 6.965196 | -7068 | 7.40E-05 | 728  | 0.333333 | 0.010195 | PPARA    |
| 2905.309 | 7.268389 | -7068 | 7.31E-05 | 541  | 0.333333 | 0.007548 | THRA     |
| 3547.027 | 8.578051 | -7068 | 7.33E-05 | 542  | 0.333333 | 0.007614 | CHP1     |
| 2915.308 | 8.179649 | -7068 | 7.29E-05 | 494  | 0.333333 | 0.006893 | TIMM8A   |

|          |          |       |          |      |          |          |         |
|----------|----------|-------|----------|------|----------|----------|---------|
| 3996.389 | 5.883399 | -7068 | 7.42E-05 | 762  | 0.333333 | 0.011494 | IDH3A   |
| 2231.521 | 8.197451 | -7068 | 7.25E-05 | 423  | 0.25     | 0.005575 | SFTPB   |
| 3130.518 | 7.090209 | -7068 | 7.32E-05 | 561  | 0.333333 | 0.007645 | EXOSC7  |
| 2144.029 | 8.705064 | -7068 | 7.26E-05 | 417  | 0.333333 | 0.006042 | GAL     |
| 2340.284 | 9.32922  | -7068 | 7.25E-05 | 403  | 0.333333 | 0.005661 | HOXA5   |
| 6109.734 | 7.833377 | -7068 | 7.45E-05 | 769  | 0.333333 | 0.011951 | PHLPP1  |
| 1667.176 | 8.923947 | -7068 | 7.22E-05 | 370  | 0.333333 | 0.005616 | PSPH    |
| 1316.274 | 6.528932 | -7068 | 7.24E-05 | 401  | 0.333333 | 0.00626  | SAR1A   |
| 5164.473 | 4.898687 | -7068 | 7.48E-05 | 940  | 0.333333 | 0.012684 | CCNB2   |
| 5418.037 | 5.357501 | -7068 | 7.46E-05 | 900  | 0.333333 | 0.012099 | PLK4    |
| 2282.09  | 10.14718 | -7068 | 7.24E-05 | 378  | 0.333333 | 0.004919 | ATPAF2  |
| 2068.545 | 7.705597 | -7068 | 7.27E-05 | 432  | 0.333333 | 0.006114 | CLDN5   |
| 1589.896 | 8.24453  | -7068 | 7.23E-05 | 376  | 0.333333 | 0.005406 | SLC35A2 |
| 3697.24  | 4.463684 | -7068 | 7.33E-05 | 710  | 0.333333 | 0.007646 | NDUFS3  |
| 6046     | 8.266583 | -7068 | 7.40E-05 | 711  | 0.333333 | 0.010774 | NPAS2   |
| 2684.923 | 10.12037 | -7068 | 7.25E-05 | 393  | 0.333333 | 0.005439 | MUC7    |
| 3067.452 | 8.244338 | -7068 | 7.30E-05 | 497  | 0.333333 | 0.006743 | BDKRB2  |
| 5176.502 | 6.113791 | -7068 | 7.47E-05 | 816  | 0.333333 | 0.012555 | DLGAP5  |
| 5609.132 | 6.18063  | -7068 | 7.48E-05 | 862  | 0.333333 | 0.013212 | FANCI   |
| 2684.205 | 6.212885 | -7068 | 7.32E-05 | 588  | 0.333333 | 0.00824  | NR4A1   |
| 2406.794 | 4.501557 | -7068 | 7.35E-05 | 670  | 0.333333 | 0.00935  | DHFR    |
| 2868.855 | 5.96931  | -7068 | 7.35E-05 | 621  | 0.333333 | 0.009309 | CCNE2   |
| 3649.241 | 6.753808 | -7068 | 7.38E-05 | 664  | 0.333333 | 0.009988 | PARVB   |
| 5133.72  | 6.651637 | -7068 | 7.47E-05 | 812  | 0.333333 | 0.013563 | MDFIC   |
| 4157.189 | 6.983015 | -7068 | 7.40E-05 | 686  | 0.333333 | 0.010663 | MMP16   |
| 3033.953 | 7.294013 | -7068 | 7.32E-05 | 554  | 0.333333 | 0.007635 | HIPK2   |
| 1773.844 | 8.908163 | -7068 | 7.23E-05 | 373  | 0.25     | 0.005465 | CDR1    |
| 1453.611 | 9.483856 | -7068 | 7.22E-05 | 327  | 0.333333 | 0.004674 | RNF24   |
| 6513.031 | 5.536302 | -7068 | 7.49E-05 | 954  | 0.333333 | 0.012458 | NDC80   |
| 7369.394 | 5.971944 | -7068 | 7.54E-05 | 1001 | 0.333333 | 0.01454  | RRM2    |
| 24544.33 | 11.56645 | -7068 | 7.59E-05 | 1029 | 0.333333 | 0.015629 | VAC14   |
| 4018.65  | 9.193656 | -7068 | 7.30E-05 | 499  | 0.333333 | 0.006156 | PFKFB1  |
| 6316.52  | 6.677496 | -7068 | 7.47E-05 | 842  | 0.333333 | 0.012341 | MRC1    |
| 1720.998 | 9.389834 | -7068 | 7.22E-05 | 353  | 0.333333 | 0.005018 | NEK3    |
| 3241.569 | 7.989808 | -7068 | 7.33E-05 | 546  | 0.333333 | 0.008002 | HOMER3  |
| 9472.694 | 6.346874 | -7068 | 7.60E-05 | 1105 | 0.333333 | 0.016634 | MAPT    |
| 2029.871 | 12.1883  | -7068 | 7.18E-05 | 280  | 0.333333 | 0.003973 | R3HCC1L |
| 6435.208 | 6.988228 | -7068 | 7.49E-05 | 850  | 0.333333 | 0.013063 | SNTB1   |
| 18143.49 | 6.812065 | -7068 | 7.83E-05 | 1454 | 0.333333 | 0.022841 | MAGI1   |
| 3597.858 | 7.520852 | -7068 | 7.32E-05 | 564  | 0.333333 | 0.007169 | S100P   |
| 4912.446 | 7.623317 | -7068 | 7.41E-05 | 702  | 0.333333 | 0.010602 | PCYT1A  |

|          |          |       |          |      |          |          |          |
|----------|----------|-------|----------|------|----------|----------|----------|
| 4300.64  | 9.27057  | -7068 | 7.33E-05 | 550  | 0.333333 | 0.007763 | ZIC2     |
| 4887.151 | 7.669614 | -7068 | 7.40E-05 | 690  | 0.333333 | 0.010249 | CCR2     |
| 1728.993 | 8.177375 | -7068 | 7.25E-05 | 387  | 0.333333 | 0.005287 | VAMP5    |
| 3269.851 | 9.086272 | -7068 | 7.29E-05 | 482  | 0.333333 | 0.00612  | TNFSF14  |
| 2969.408 | 9.755104 | -7068 | 7.27E-05 | 444  | 0.333333 | 0.006265 | FOXO1    |
| 6732.534 | 6.341937 | -7068 | 7.50E-05 | 920  | 0.333333 | 0.013495 | RFC5     |
| 4825.897 | 9.471119 | -7068 | 7.36E-05 | 594  | 0.333333 | 0.008339 | ESPL1    |
| 3840.97  | 6.930179 | -7068 | 7.30E-05 | 586  | 0.333333 | 0.00702  | NDUFA6   |
| 2453.473 | 6.154738 | -7068 | 7.32E-05 | 565  | 0.333333 | 0.008734 | HMGXB4   |
| 714.17   | 9.689637 | -7068 | 7.15E-05 | 203  | 0.333333 | 0.002485 | TBX6     |
| 1532.979 | 9.835759 | -7068 | 7.20E-05 | 302  | 0.333333 | 0.003695 | KCNJ13   |
| 4591.844 | 5.247596 | -7068 | 7.39E-05 | 820  | 0.333333 | 0.009942 | RAD51    |
| 2295.02  | 9.481377 | -7068 | 7.26E-05 | 410  | 0.333333 | 0.005797 | DCAF4    |
| 9491.086 | 7.099098 | -7068 | 7.57E-05 | 1021 | 0.333333 | 0.015727 | PLXDC1   |
| 2400.534 | 6.869596 | -7068 | 7.28E-05 | 506  | 0.333333 | 0.006634 | SOCS3    |
| 5502.631 | 7.718837 | -7068 | 7.42E-05 | 732  | 0.333333 | 0.010758 | PVR      |
| 3785.713 | 7.20558  | -7068 | 7.37E-05 | 640  | 0.333333 | 0.009772 | COBL     |
| 7463.775 | 8.038778 | -7068 | 7.48E-05 | 827  | 0.333333 | 0.012438 | RNF19B   |
| 2402.468 | 8.375893 | -7068 | 7.25E-05 | 436  | 0.333333 | 0.006238 | GABPB1   |
| 15307.07 | 6.688148 | -7068 | 7.76E-05 | 1349 | 0.333333 | 0.020677 | OIP5     |
| 2123.997 | 6.274319 | -7068 | 7.30E-05 | 511  | 0.333333 | 0.007842 | SPON1    |
| 1868.426 | 7.242843 | -7068 | 7.28E-05 | 446  | 0.333333 | 0.007373 | ARMC8    |
| 838.0199 | 8.886252 | -7068 | 7.16E-05 | 252  | 0.333333 | 0.003682 | MIA3     |
| 1316.518 | 6.061935 | -7068 | 7.23E-05 | 400  | 0.333333 | 0.006097 | CSTF2T   |
| 1395.455 | 6.080363 | -7068 | 7.24E-05 | 421  | 0.333333 | 0.00595  | DNAJC8   |
| 1062.419 | 8.010348 | -7068 | 7.11E-05 | 224  | 0.333333 | 0.001656 | ZNF548   |
| 1318.616 | 8.703261 | -7068 | 7.20E-05 | 326  | 0.25     | 0.004668 | SLC25A14 |
| 3193.816 | 8.29486  | -7068 | 7.29E-05 | 495  | 0.333333 | 0.006283 | RECQL4   |
| 1359.48  | 9.070087 | -7068 | 7.20E-05 | 313  | 0.333333 | 0.00398  | CYHR1    |
| 13045.24 | 7.049476 | -7068 | 7.70E-05 | 1212 | 0.333333 | 0.019219 | PHACTR1  |
| 2256.903 | 6.48701  | -7068 | 7.29E-05 | 516  | 0.333333 | 0.007052 | CCNF     |
| 1817.35  | 9.68804  | -7068 | 7.22E-05 | 346  | 0.333333 | 0.004561 | ABCB9    |
| 2875.9   | 8.236789 | -7068 | 7.29E-05 | 491  | 0.333333 | 0.00683  | CSF2     |
| 1396.226 | 7.819976 | -7068 | 7.22E-05 | 345  | 0.333333 | 0.004385 | SIRPB1   |
| 9242.153 | 6.986796 | -7068 | 7.58E-05 | 1019 | 0.333333 | 0.015525 | SIRPA    |
| 4517.858 | 6.401727 | -7068 | 7.42E-05 | 753  | 0.333333 | 0.011164 | TYMS     |
| 1331.563 | 8.335548 | -7068 | 7.20E-05 | 324  | 0.333333 | 0.004358 | ANGPTL7  |
| 5294.917 | 6.248581 | -7068 | 7.44E-05 | 803  | 0.333333 | 0.011779 | IGFBP7   |
| 4136.048 | 5.26263  | -7068 | 7.40E-05 | 774  | 0.333333 | 0.009703 | CDC45    |
| 3893.245 | 8.660455 | -7068 | 7.31E-05 | 528  | 0.333333 | 0.006527 | PTK6     |
| 5142.383 | 7.352617 | -7068 | 7.43E-05 | 741  | 0.333333 | 0.011925 | CAMSAP1  |

|          |          |       |          |      |          |          |           |
|----------|----------|-------|----------|------|----------|----------|-----------|
| 2600.177 | 7.036472 | -7068 | 7.30E-05 | 528  | 0.333333 | 0.007793 | RARRES1   |
| 6118.751 | 6.866138 | -7068 | 7.47E-05 | 833  | 0.333333 | 0.01287  | GAS1      |
| 5862.63  | 7.439146 | -7068 | 7.46E-05 | 788  | 0.333333 | 0.012757 | C18orf25  |
| 3360.208 | 8.2012   | -7068 | 7.33E-05 | 547  | 0.333333 | 0.007613 | FASN      |
| 2905.957 | 6.689161 | -7068 | 7.33E-05 | 583  | 0.333333 | 0.008559 | ACAT2     |
| 2660.216 | 5.478866 | -7068 | 7.34E-05 | 612  | 0.333333 | 0.008456 | SPAG5     |
| 1675.348 | 5.045135 | -7068 | 7.29E-05 | 522  | 0.333333 | 0.007392 | TIMELESS  |
| 5677.732 | 5.181423 | -7068 | 7.47E-05 | 934  | 0.333333 | 0.012346 | BUB1      |
| 6618.514 | 12.96647 | -7068 | 7.29E-05 | 461  | 0.333333 | 0.006782 | SORT1     |
| 2089.304 | 7.108019 | -7068 | 7.27E-05 | 453  | 0.333333 | 0.005778 | FLT4      |
| 2824.081 | 7.954292 | -7068 | 7.31E-05 | 515  | 0.333333 | 0.007447 | NUP210    |
| 1374.671 | 7.411342 | -7068 | 7.19E-05 | 331  | 0.333333 | 0.00392  | SERPINB13 |
| 4803.623 | 7.745313 | -7068 | 7.39E-05 | 664  | 0.333333 | 0.009346 | FCN2      |
| 2343.163 | 6.707408 | -7068 | 7.23E-05 | 452  | 0.333333 | 0.005624 | NDUFS5    |
| 3243.86  | 7.361129 | -7068 | 7.27E-05 | 510  | 0.333333 | 0.006012 | NDUFB8    |
| 10243.23 | 6.676767 | -7068 | 7.64E-05 | 1123 | 0.333333 | 0.018068 | TOM1L1    |
| 4823.34  | 8.921526 | -7068 | 7.36E-05 | 605  | 0.333333 | 0.008339 | ETHE1     |
| 2180.452 | 7.015755 | -7068 | 7.30E-05 | 491  | 0.333333 | 0.007713 | YAF2      |
| 4341.715 | 6.470566 | -7068 | 7.40E-05 | 729  | 0.333333 | 0.01057  | FST       |
| 5398.789 | 7.306149 | -7068 | 7.43E-05 | 761  | 0.333333 | 0.011622 | COQ2      |
| 2074.947 | 9.408554 | -7068 | 7.25E-05 | 393  | 0.333333 | 0.005549 | RBMS2     |
| 3401.397 | 7.668941 | -7068 | 7.33E-05 | 571  | 0.333333 | 0.008178 | RDH11     |
| 1047.441 | 8.512066 | -7068 | 7.19E-05 | 299  | 0.333333 | 0.004301 | MAST4     |
| 1978.482 | 6.704039 | -7068 | 7.28E-05 | 467  | 0.333333 | 0.006237 | CYP4F11   |
| 2192.659 | 6.480059 | -7068 | 7.27E-05 | 488  | 0.333333 | 0.006371 | FCGR3B    |
| 10340.94 | 6.66844  | -7068 | 7.61E-05 | 1117 | 0.333333 | 0.016817 | KYNU      |
| 3093.341 | 7.995169 | -7068 | 7.32E-05 | 527  | 0.333333 | 0.00774  | TNFAIP8   |
| 13230    | 6.968779 | -7068 | 7.71E-05 | 1241 | 0.333333 | 0.019738 | PARM1     |
| 5309.3   | 7.16095  | -7068 | 7.43E-05 | 749  | 0.333333 | 0.010943 | ADM       |
| 2831.59  | 6.779346 | -7068 | 7.32E-05 | 543  | 0.333333 | 0.007338 | KRT16     |
| 2839.497 | 7.215523 | -7068 | 7.33E-05 | 556  | 0.333333 | 0.008302 | GPSM2     |
| 5413.947 | 6.940026 | -7068 | 7.44E-05 | 771  | 0.333333 | 0.011452 | MT2A      |
| 2357.048 | 8.799445 | -7068 | 7.27E-05 | 428  | 0.333333 | 0.005982 | GPR4      |
| 2205.448 | 8.339754 | -7068 | 7.28E-05 | 444  | 0.333333 | 0.006721 | RABL3     |
| 4931.808 | 10.12241 | -7068 | 7.32E-05 | 545  | 0.333333 | 0.007594 | ASCL2     |
| 3046.373 | 8.689777 | -7068 | 7.28E-05 | 481  | 0.333333 | 0.005914 | GLS2      |
| 802.0966 | 8.462099 | -7068 | 7.17E-05 | 259  | 0.333333 | 0.003765 | SUSD5     |
| 1439.52  | 9.290767 | -7068 | 7.18E-05 | 299  | 0.333333 | 0.003605 | NOX1      |
| 2688.436 | 7.087836 | -7068 | 7.31E-05 | 529  | 0.333333 | 0.008034 | IL27RA    |
| 2902.491 | 7.652837 | -7068 | 7.30E-05 | 519  | 0.333333 | 0.007368 | TNFRSF11B |
| 2517.075 | 7.892386 | -7068 | 7.27E-05 | 468  | 0.333333 | 0.006686 | PKP4      |

|          |          |       |          |     |          |          |          |
|----------|----------|-------|----------|-----|----------|----------|----------|
| 1516.391 | 8.424565 | -7068 | 7.21E-05 | 349 | 0.333333 | 0.004647 | TLR5     |
| 1629.846 | 5.352318 | -7068 | 7.27E-05 | 490 | 0.333333 | 0.006807 | MYH11    |
| 3919.982 | 7.495823 | -7068 | 7.35E-05 | 613 | 0.333333 | 0.008682 | TJP3     |
| 1256.445 | 8.983969 | -7068 | 7.21E-05 | 299 | 0.333333 | 0.003913 | PSCA     |
| 6766.111 | 8.106779 | -7068 | 7.45E-05 | 777 | 0.333333 | 0.011024 | ALDH4A1  |
| 2664.384 | 5.405412 | -7068 | 7.32E-05 | 598 | 0.333333 | 0.008176 | RAD51AP1 |
| 3965.985 | 7.014565 | -7068 | 7.39E-05 | 671 | 0.333333 | 0.009857 | FTH1     |
| 3705.511 | 7.312538 | -7068 | 7.34E-05 | 618 | 0.333333 | 0.008421 | ATF5     |
| 2259.588 | 8.636893 | -7068 | 7.26E-05 | 419 | 0.333333 | 0.005293 | PRKAR1B  |
| 3820.672 | 7.486078 | -7068 | 7.35E-05 | 609 | 0.333333 | 0.008893 | TACSTD2  |
| 3631.621 | 8.169457 | -7068 | 7.33E-05 | 554 | 0.333333 | 0.007781 | NLRP3    |
| 1509.971 | 9.782307 | -7068 | 7.20E-05 | 310 | 0.333333 | 0.004003 | GYPA     |
| 2562.11  | 6.668987 | -7068 | 7.30E-05 | 538 | 0.333333 | 0.007455 | IGF2     |
| 3161.336 | 7.290193 | -7068 | 7.33E-05 | 575 | 0.333333 | 0.008302 | ME1      |
| 6253.004 | 7.521726 | -7068 | 7.41E-05 | 746 | 0.333333 | 0.009376 | S100A9   |
| 1936.64  | 8.46352  | -7068 | 7.24E-05 | 386 | 0.333333 | 0.005199 | MINK1    |
| 2715.294 | 9.315399 | -7068 | 7.26E-05 | 429 | 0.333333 | 0.005393 | PELP1    |
| 3472.014 | 7.33152  | -7068 | 7.34E-05 | 598 | 0.333333 | 0.008703 | ANGPT2   |
| 2952.908 | 7.461285 | -7068 | 7.33E-05 | 540 | 0.333333 | 0.008479 | STON1    |
| 2015.65  | 7.062488 | -7068 | 7.27E-05 | 458 | 0.333333 | 0.006783 | MED20    |
| 4400.432 | 8.243708 | -7068 | 7.36E-05 | 621 | 0.333333 | 0.008843 | HSDL2    |
| 3507.644 | 6.513865 | -7068 | 7.32E-05 | 606 | 0.333333 | 0.007156 | ACAA1    |
| 2488.543 | 6.340546 | -7068 | 7.30E-05 | 528 | 0.333333 | 0.007039 | ATP5H    |
| 3458.917 | 6.167649 | -7068 | 7.36E-05 | 648 | 0.333333 | 0.009001 | MT1H     |
| 4559.053 | 6.785776 | -7068 | 7.41E-05 | 723 | 0.333333 | 0.010298 | GADD45B  |
| 3277.455 | 9.78953  | -7068 | 7.28E-05 | 450 | 0.333333 | 0.005491 | ACOT8    |
| 938.2778 | 6.979629 | -7068 | 7.21E-05 | 325 | 0.333333 | 0.005321 | VPS13B   |
| 3154.62  | 6.094708 | -7068 | 7.32E-05 | 612 | 0.25     | 0.007774 | HSPG2    |
| 2656.305 | 6.270016 | -7068 | 7.32E-05 | 559 | 0.333333 | 0.007882 | CD163    |
| 1930.349 | 8.885903 | -7068 | 7.23E-05 | 374 | 0.333333 | 0.004802 | MAP1A    |
| 2065.549 | 7.251576 | -7068 | 7.27E-05 | 449 | 0.333333 | 0.006056 | VNN1     |
| 1927.005 | 9.322665 | -7068 | 7.23E-05 | 368 | 0.333333 | 0.004899 | PAQR4    |
| 4715.196 | 7.546391 | -7068 | 7.39E-05 | 687 | 0.333333 | 0.010265 | EREG     |
| 4393.611 | 6.814213 | -7068 | 7.40E-05 | 692 | 0.333333 | 0.010051 | IFITM3   |
| 3142.428 | 7.702069 | -7068 | 7.34E-05 | 555 | 0.333333 | 0.008374 | IHH      |
| 1793.326 | 8.886077 | -7068 | 7.23E-05 | 371 | 0.333333 | 0.005209 | JMJD6    |
| 2778.769 | 8.075009 | -7068 | 7.30E-05 | 492 | 0.333333 | 0.006707 | RARG     |
| 4938.937 | 6.122209 | -7068 | 7.38E-05 | 754 | 0.333333 | 0.009352 | HP       |
| 2121.513 | 7.487455 | -7068 | 7.28E-05 | 461 | 0.333333 | 0.007008 | TRIL     |
| 6692.084 | 7.734952 | -7068 | 7.46E-05 | 797 | 0.333333 | 0.011888 | KRT7     |
| 2139.709 | 8.786042 | -7068 | 7.23E-05 | 388 | 0.333333 | 0.005237 | FUT3     |

|          |          |       |          |      |          |          |          |
|----------|----------|-------|----------|------|----------|----------|----------|
| 2433.309 | 7.50494  | -7068 | 7.26E-05 | 480  | 0.333333 | 0.00657  | PSMC3IP  |
| 1383.134 | 8.62472  | -7068 | 7.20E-05 | 328  | 0.333333 | 0.004707 | CEP290   |
| 1063.553 | 6.18945  | -7068 | 7.11E-05 | 269  | 0.25     | 0.002449 | ZNF780A  |
| 5167.829 | 7.477074 | -7068 | 7.42E-05 | 726  | 0.333333 | 0.011147 | PLRG1    |
| 1133.983 | 12.43937 | -7068 | 7.14E-05 | 215  | 0.333333 | 0.002544 | B3GAT2   |
| 978.7173 | 9.361557 | -7068 | 7.17E-05 | 251  | 0.333333 | 0.003129 | SLC1A7   |
| 1445.126 | 5.783282 | -7068 | 7.24E-05 | 430  | 0.333333 | 0.005604 | GTSE1    |
| 4764.608 | 6.22657  | -7068 | 7.43E-05 | 790  | 0.333333 | 0.011514 | TUBB     |
| 2391.333 | 9.354793 | -7068 | 7.26E-05 | 415  | 0.333333 | 0.006129 | ABCB6    |
| 2244.059 | 8.684119 | -7068 | 7.26E-05 | 418  | 0.333333 | 0.005688 | MCAT     |
| 2623.859 | 8.321562 | -7068 | 7.28E-05 | 468  | 0.333333 | 0.0068   | FOXA2    |
| 1894.333 | 7.429795 | -7068 | 7.27E-05 | 437  | 0.333333 | 0.006558 | OCLN     |
| 5788.51  | 6.95526  | -7068 | 7.46E-05 | 809  | 0.333333 | 0.012629 | CERS6    |
| 2226.303 | 8.257307 | -7068 | 7.28E-05 | 445  | 0.333333 | 0.006395 | MTHFR    |
| 2546.389 | 8.745113 | -7068 | 7.28E-05 | 449  | 0.333333 | 0.006554 | FOX E1   |
| 1916.025 | 9.186837 | -7068 | 7.23E-05 | 362  | 0.333333 | 0.004683 | LTC4S    |
| 1628.447 | 9.646092 | -7068 | 7.21E-05 | 334  | 0.25     | 0.004673 | ATXN7L3B |
| 1046.696 | 8.729176 | -7068 | 7.18E-05 | 281  | 0.25     | 0.003857 | TBX1     |
| 745.6736 | 7.106919 | -7068 | 7.16E-05 | 258  | 0.333333 | 0.002987 | NR2E3    |
| 1418.14  | 8.275843 | -7068 | 7.22E-05 | 337  | 0.25     | 0.004372 | MMP25    |
| 1292.797 | 7.40802  | -7068 | 7.22E-05 | 353  | 0.333333 | 0.004943 | OAS2     |
| 2577.587 | 8.343447 | -7068 | 7.25E-05 | 434  | 0.333333 | 0.005519 | KLK10    |
| 4573.592 | 7.21638  | -7068 | 7.41E-05 | 697  | 0.333333 | 0.010992 | EXPH5    |
| 2214.203 | 7.352859 | -7068 | 7.30E-05 | 485  | 0.333333 | 0.007893 | ENDOD1   |
| 4182.432 | 7.082741 | -7068 | 7.39E-05 | 683  | 0.333333 | 0.010502 | RECK     |
| 2078.101 | 8.640724 | -7068 | 7.24E-05 | 391  | 0.333333 | 0.005231 | ADORA3   |
| 3773.505 | 7.763886 | -7068 | 7.35E-05 | 598  | 0.333333 | 0.00883  | WISP1    |
| 16035.62 | 7.192329 | -7068 | 7.76E-05 | 1315 | 0.333333 | 0.021274 | IQCK     |
| 6007.102 | 7.566105 | -7068 | 7.46E-05 | 789  | 0.333333 | 0.012594 | COQ7     |
| 1389.627 | 9.243349 | -7068 | 7.20E-05 | 312  | 0.333333 | 0.004421 | MYCL     |
| 874.591  | 11.10447 | -7068 | 7.14E-05 | 214  | 0.333333 | 0.002669 | LYRM9    |
| 1689.581 | 7.74897  | -7068 | 7.25E-05 | 394  | 0.333333 | 0.005459 | IFNA1    |
| 1024.123 | 10.74867 | -7068 | 7.16E-05 | 240  | 0.333333 | 0.003283 | TMEM30B  |
| 3630.063 | 7.277123 | -7068 | 7.37E-05 | 631  | 0.333333 | 0.00982  | PAWR     |
| 3264.011 | 5.030088 | -7068 | 7.39E-05 | 742  | 0.333333 | 0.01057  | HSPD1    |
| 1871.055 | 12.08142 | -7068 | 7.20E-05 | 297  | 0.333333 | 0.004345 | SLC5A3   |
| 3206.413 | 7.7581   | -7068 | 7.31E-05 | 530  | 0.333333 | 0.00729  | HSPA6    |
| 2962.737 | 7.091947 | -7068 | 7.31E-05 | 548  | 0.333333 | 0.007389 | METTL7A  |
| 1952.519 | 8.622548 | -7068 | 7.24E-05 | 387  | 0.333333 | 0.004997 | TICAM1   |
| 5105.379 | 7.169754 | -7068 | 7.41E-05 | 722  | 0.333333 | 0.010285 | MAFF     |
| 3217.22  | 6.350582 | -7068 | 7.36E-05 | 632  | 0.333333 | 0.009498 | COL14A1  |

|          |          |       |          |     |          |          |          |
|----------|----------|-------|----------|-----|----------|----------|----------|
| 1031.101 | 6.192325 | -7068 | 7.22E-05 | 363 | 0.333333 | 0.005878 | TMEM41B  |
| 6028.662 | 7.281545 | -7068 | 7.47E-05 | 806 | 0.333333 | 0.013108 | SAMD4A   |
| 4508.986 | 6.693054 | -7068 | 7.43E-05 | 745 | 0.333333 | 0.011876 | SIK1     |
| 3410.708 | 7.096417 | -7068 | 7.37E-05 | 617 | 0.333333 | 0.009578 | CH25H    |
| 2345.741 | 7.080856 | -7068 | 7.29E-05 | 497 | 0.333333 | 0.00709  | APOL1    |
| 2610.207 | 7.8994   | -7068 | 7.31E-05 | 505 | 0.333333 | 0.007726 | STC2     |
| 1364.012 | 6.893877 | -7068 | 7.23E-05 | 386 | 0.333333 | 0.005521 | SVEP1    |
| 643.2079 | 8.486972 | -7068 | 7.16E-05 | 241 | 0.333333 | 0.003715 | SENP5    |
| 3377.967 | 4.617759 | -7068 | 7.38E-05 | 758 | 0.333333 | 0.009588 | BIRC5    |
| 5746.214 | 8.007757 | -7068 | 7.41E-05 | 724 | 0.333333 | 0.010812 | KLF11    |
| 1377.462 | 5.531158 | -7068 | 7.23E-05 | 427 | 0.333333 | 0.00563  | CCL3     |
| 3001.419 | 5.622566 | -7068 | 7.33E-05 | 621 | 0.333333 | 0.007466 | APOC1    |
| 1891.944 | 10.18808 | -7068 | 7.21E-05 | 324 | 0.333333 | 0.003806 | SOX15    |
| 2028.152 | 7.566671 | -7068 | 7.27E-05 | 447 | 0.333333 | 0.006694 | REEP5    |
| 1566.937 | 7.618911 | -7068 | 7.24E-05 | 391 | 0.333333 | 0.006059 | YIPF6    |
| 4786.981 | 7.533374 | -7068 | 7.41E-05 | 691 | 0.333333 | 0.010316 | CD24     |
| 3147.658 | 5.946884 | -7068 | 7.37E-05 | 665 | 0.333333 | 0.010224 | RHEB     |
| 1375.876 | 14.63023 | -7068 | 7.14E-05 | 201 | 0.333333 | 0.0027   | USP6     |
| 1942.882 | 6.745843 | -7068 | 7.28E-05 | 474 | 0.333333 | 0.007013 | SQLE     |
| 1817.458 | 8.156744 | -7068 | 7.25E-05 | 396 | 0.333333 | 0.005381 | RNF187   |
| 1664.584 | 9.616015 | -7068 | 7.21E-05 | 328 | 0.333333 | 0.00416  | SNCG     |
| 3279.52  | 8.032712 | -7068 | 7.34E-05 | 562 | 0.333333 | 0.008314 | APOBEC3B |
| 6089.205 | 7.493454 | -7068 | 7.46E-05 | 788 | 0.333333 | 0.011983 | GOS2     |
| 1726.313 | 8.2611   | -7068 | 7.22E-05 | 369 | 0.333333 | 0.004863 | WISP2    |
| 8111.288 | 6.633943 | -7068 | 7.52E-05 | 953 | 0.333333 | 0.013816 | GPRC5A   |
| 5488.221 | 7.636004 | -7068 | 7.43E-05 | 749 | 0.333333 | 0.011614 | RNFT2    |
| 5531.811 | 6.478011 | -7068 | 7.46E-05 | 814 | 0.333333 | 0.011639 | PLAU     |
| 2248.294 | 7.587149 | -7068 | 7.29E-05 | 476 | 0.333333 | 0.00714  | DLG3     |
| 1807.622 | 7.827987 | -7068 | 7.25E-05 | 412 | 0.333333 | 0.006016 | SOX13    |
| 2557.793 | 8.022048 | -7068 | 7.28E-05 | 464 | 0.333333 | 0.006418 | COL10A1  |
| 1109.073 | 9.589365 | -7068 | 7.18E-05 | 262 | 0.333333 | 0.003507 | SIPA1L3  |
| 2131.862 | 6.550197 | -7068 | 7.29E-05 | 502 | 0.25     | 0.007254 | PLTP     |
| 2688.934 | 7.659103 | -7068 | 7.32E-05 | 515 | 0.333333 | 0.007931 | SAMHD1   |
| 2462.598 | 5.30423  | -7068 | 7.33E-05 | 606 | 0.333333 | 0.009013 | COL5A2   |
| 2818.349 | 9.249466 | -7068 | 7.27E-05 | 440 | 0.333333 | 0.006407 | TEX30    |
| 1889.354 | 7.22794  | -7068 | 7.25E-05 | 430 | 0.333333 | 0.005753 | CXCL11   |
| 1422.519 | 10.19432 | -7068 | 7.20E-05 | 306 | 0.333333 | 0.004213 | IAH1     |
| 3364.055 | 8.196794 | -7068 | 7.33E-05 | 550 | 0.333333 | 0.008297 | F2RL1    |
| 1769.874 | 5.863179 | -7068 | 7.26E-05 | 453 | 0.333333 | 0.005768 | IGSF6    |
| 3143.393 | 6.551691 | -7068 | 7.35E-05 | 598 | 0.333333 | 0.008579 | FCGR2A   |
| 2759.99  | 6.922286 | -7068 | 7.32E-05 | 548 | 0.333333 | 0.008444 | PXDN     |



|          |          |       |          |     |          |          |          |
|----------|----------|-------|----------|-----|----------|----------|----------|
| 2169.581 | 8.613511 | -7068 | 7.26E-05 | 423 | 0.333333 | 0.006086 | SLC46A3  |
| 3772.246 | 5.549152 | -7068 | 7.37E-05 | 733 | 0.333333 | 0.00947  | WDHD1    |
| 3151.257 | 6.494543 | -7068 | 7.32E-05 | 603 | 0.333333 | 0.007824 | CDC25C   |
| 3723.59  | 9.391628 | -7068 | 7.32E-05 | 520 | 0.333333 | 0.007981 | OPRM1    |
| 2052.455 | 6.38922  | -7068 | 7.28E-05 | 495 | 0.333333 | 0.006838 | BMP1     |
| 1938.143 | 6.094012 | -7068 | 7.28E-05 | 489 | 0.333333 | 0.006684 | CCL8     |
| 2118.431 | 7.194108 | -7068 | 7.28E-05 | 472 | 0.333333 | 0.00688  | IFIT2    |
| 1630.563 | 8.071866 | -7068 | 7.23E-05 | 372 | 0.333333 | 0.005048 | DOK4     |
| 1061.756 | 8.803999 | -7068 | 7.17E-05 | 275 | 0.333333 | 0.003383 | FUT6     |
| 1218.306 | 9.019557 | -7068 | 7.20E-05 | 309 | 0.333333 | 0.004505 | MOCS1    |
| 2132.946 | 7.276204 | -7068 | 7.28E-05 | 473 | 0.333333 | 0.007073 | ELOVL5   |
| 1787.386 | 7.808937 | -7068 | 7.26E-05 | 414 | 0.333333 | 0.006344 | PDE1C    |
| 9029.184 | 8.031327 | -7068 | 7.53E-05 | 912 | 0.333333 | 0.013935 | SEMA3D   |
| 978.5977 | 10.67979 | -7068 | 7.16E-05 | 231 | 0.333333 | 0.002807 | ZSWIM8   |
| 807.6921 | 7.127558 | -7068 | 7.19E-05 | 298 | 0.333333 | 0.004594 | FEZ2     |
| 4509.306 | 6.586556 | -7068 | 7.42E-05 | 738 | 0.333333 | 0.011418 | MT1E     |
| 1027.219 | 7.718594 | -7068 | 7.18E-05 | 293 | 0.333333 | 0.003813 | ACSM2A   |
| 1617.083 | 7.268393 | -7068 | 7.24E-05 | 404 | 0.25     | 0.005916 | ABCC9    |
| 1859.353 | 6.697027 | -7068 | 7.27E-05 | 452 | 0.25     | 0.006979 | SULF1    |
| 2544.343 | 7.259865 | -7068 | 7.29E-05 | 489 | 0.25     | 0.007086 | ANGPTL2  |
| 1825.215 | 8.288773 | -7068 | 7.23E-05 | 381 | 0.333333 | 0.005205 | HOPX     |
| 3056.972 | 6.200967 | -7068 | 7.31E-05 | 590 | 0.333333 | 0.007434 | CFHR3    |
| 2034.122 | 6.40669  | -7068 | 7.28E-05 | 485 | 0.333333 | 0.006789 | EFEMP1   |
| 1973.198 | 5.038578 | -7068 | 7.30E-05 | 555 | 0.333333 | 0.007913 | LAMA2    |
| 3801.164 | 22.10573 | -7068 | 7.17E-05 | 296 | 0.25     | 0.004044 | UGT2B11  |
| 18158.25 | 16.18881 | -7068 | 7.49E-05 | 875 | 0.333333 | 0.013662 | UGT2B7   |
| 2205.052 | 6.361298 | -7068 | 7.28E-05 | 505 | 0.333333 | 0.006813 | SAA1     |
| 1389.193 | 6.36371  | -7068 | 7.21E-05 | 392 | 0.333333 | 0.005013 | SAA4     |
| 326.9074 | 8.570343 | -7068 | 7.10E-05 | 151 | 0.333333 | 0.001863 | PCDHGA12 |
| 635.514  | 8.292693 | -7068 | 7.15E-05 | 233 | 0.333333 | 0.003393 | KNOP1    |
| 1387.678 | 7.02676  | -7068 | 7.23E-05 | 376 | 0.333333 | 0.005349 | MT1F     |
| 184.2382 | 7.21481  | -7068 | 7.06E-05 | 130 | 0.333333 | 0.001676 | MT1A     |
| 361.0604 | 6.76535  | -7068 | 7.11E-05 | 194 | 0.25     | 0.002691 | MT1B     |

| Supplementary Table S5: Topological network analysis related to anti-VEGF resistance |                   |                    |                 |                       |                    |                 |           |
|--------------------------------------------------------------------------------------|-------------------|--------------------|-----------------|-----------------------|--------------------|-----------------|-----------|
| Betweenness<br>unDir                                                                 | Centroid<br>unDir | Closeness<br>unDir | Degree<br>unDir | Eccentricity<br>unDir | Radiality<br>unDir | Stress<br>unDir | gene name |
| 11515.9                                                                              | -4354             | 1.67E-04           | 3225            | 0.333333              | 3.620436           | 4584184         | BMP4      |
| 10219.47                                                                             | -4354             | 1.65E-04           | 3096            | 0.333333              | 3.609185           | 4319870         | FMOD      |
| 12475.34                                                                             | -4354             | 1.65E-04           | 2805            | 0.333333              | 3.60597            | 4575472         | TMSB4X    |
| 10656.26                                                                             | -4354             | 1.64E-04           | 3032            | 0.333333              | 3.598852           | 4259758         | CDH3      |
| 9338.793                                                                             | -4354             | 1.61E-04           | 2978            | 0.333333              | 3.575201           | 3888830         | TCF7L1    |
| 9901.275                                                                             | -4354             | 1.61E-04           | 3042            | 0.333333              | 3.574053           | 3881566         | DRD5      |
| 12107.06                                                                             | -4354             | 1.61E-04           | 2983            | 0.333333              | 3.573364           | 4120140         | UBB       |
| 8739.395                                                                             | -4354             | 1.60E-04           | 2577            | 0.333333              | 3.560276           | 3680034         | ITPKC     |
| 9515.262                                                                             | -4354             | 1.59E-04           | 2720            | 0.333333              | 3.558668           | 3732452         | ADCY6     |
| 10149.08                                                                             | -4354             | 1.59E-04           | 2541            | 0.333333              | 3.550402           | 3963814         | PLA2G2D   |
| 7981.938                                                                             | -4354             | 1.58E-04           | 2690            | 0.333333              | 3.549024           | 3436928         | FOXF2     |
| 9241.452                                                                             | -4354             | 1.58E-04           | 2538            | 0.333333              | 3.546498           | 3587744         | CLDN10    |
| 10027.91                                                                             | -4354             | 1.58E-04           | 3399            | 0.333333              | 3.543972           | 3624774         | UBC       |
| 9238.92                                                                              | -4354             | 1.58E-04           | 2751            | 0.333333              | 3.543972           | 3520770         | TUBA1A    |
| 8406.069                                                                             | -4354             | 1.58E-04           | 2904            | 0.333333              | 3.542824           | 3455684         | PPARG     |
| 8738.279                                                                             | -4354             | 1.58E-04           | 2596            | 0.333333              | 3.541447           | 3428588         | EDAR      |
| 9502.391                                                                             | -4354             | 1.58E-04           | 2788            | 0.333333              | 3.540987           | 3451088         | CLIC1     |
| 8838.422                                                                             | -4354             | 1.57E-04           | 2644            | 0.333333              | 3.538462           | 3443884         | PLD2      |
| 8300.262                                                                             | -4354             | 1.57E-04           | 2657            | 0.333333              | 3.538232           | 3358972         | ATP12A    |
| 7830.647                                                                             | -4354             | 1.57E-04           | 2399            | 0.333333              | 3.53318            | 3275670         | TINAGL1   |
| 8046.941                                                                             | -4354             | 1.57E-04           | 2748            | 0.333333              | 3.532721           | 3335690         | PIM1      |
| 7432.052                                                                             | -4354             | 1.57E-04           | 2770            | 0.333333              | 3.532032           | 3221672         | VEGFC     |
| 7217.785                                                                             | -4354             | 1.57E-04           | 2646            | 0.333333              | 3.532032           | 3215426         | CD34      |
| 8205.219                                                                             | -4354             | 1.56E-04           | 2917            | 0.333333              | 3.531573           | 3332962         | NFKB1     |
| 8512.423                                                                             | -4354             | 1.56E-04           | 2386            | 0.333333              | 3.529277           | 3359134         | SH2B2     |
| 7649.614                                                                             | -4354             | 1.56E-04           | 2465            | 0.333333              | 3.526521           | 3198124         | CD63      |
| 8441.225                                                                             | -4354             | 1.56E-04           | 2859            | 0.333333              | 3.525144           | 3267290         | PRL       |
| 7701.616                                                                             | -4354             | 1.56E-04           | 2507            | 0.333333              | 3.523307           | 3201004         | TRIP10    |
| 7164.489                                                                             | -4354             | 1.56E-04           | 2475            | 0.333333              | 3.523077           | 3168558         | SDC4      |
| 7523.204                                                                             | -4354             | 1.56E-04           | 2556            | 0.333333              | 3.522618           | 3165880         | GNA15     |
| 7676.734                                                                             | -4354             | 1.55E-04           | 2563            | 0.333333              | 3.522158           | 3148590         | ITGA10    |
| 7198.178                                                                             | -4354             | 1.55E-04           | 2446            | 0.333333              | 3.519173           | 3095450         | CYP27A1   |
| 7712.566                                                                             | -4354             | 1.55E-04           | 2395            | 0.333333              | 3.519173           | 3072546         | GSTM5     |
| 7977.192                                                                             | -4354             | 1.55E-04           | 2766            | 0.333333              | 3.517336           | 3103646         | GRM4      |
| 7633.816                                                                             | -4354             | 1.55E-04           | 2555            | 0.333333              | 3.517336           | 3154538         | FTL       |
| 8406.12                                                                              | -4354             | 1.55E-04           | 2925            | 0.333333              | 3.517107           | 3195668         | MAPK3     |
| 7297.843                                                                             | -4354             | 1.55E-04           | 2722            | 0.333333              | 3.517107           | 3110146         | GAB2      |
| 7027.675                                                                             | -4354             | 1.55E-04           | 2691            | 0.333333              | 3.51527            | 3068386         | CEBPA     |
| 7239.319                                                                             | -4354             | 1.55E-04           | 2305            | 0.333333              | 3.51504            | 3008196         | PDE6G     |

|          |       |          |      |          |          |         |          |
|----------|-------|----------|------|----------|----------|---------|----------|
| 6947.126 | -4354 | 1.55E-04 | 2555 | 0.333333 | 3.513433 | 3001230 | PYGL     |
| 8073.24  | -4354 | 1.55E-04 | 2449 | 0.333333 | 3.512974 | 3071978 | POU4F2   |
| 8163.97  | -4354 | 1.55E-04 | 2349 | 0.333333 | 3.512974 | 3055882 | IFNA16   |
| 7704.215 | -4354 | 1.54E-04 | 2647 | 0.333333 | 3.512055 | 3025588 | OCA2     |
| 6830.364 | -4354 | 1.54E-04 | 2342 | 0.333333 | 3.511137 | 2985836 | TNFRSF8  |
| 7793.448 | -4354 | 1.54E-04 | 2412 | 0.333333 | 3.510907 | 3034778 | CD81     |
| 7053.071 | -4354 | 1.54E-04 | 2626 | 0.333333 | 3.509529 | 2947482 | AGT      |
| 8033.616 | -4354 | 1.54E-04 | 2550 | 0.333333 | 3.5093   | 3067982 | RPS6KA1  |
| 7437.419 | -4354 | 1.54E-04 | 2318 | 0.333333 | 3.50884  | 3001552 | HAMP     |
| 7143.593 | -4354 | 1.54E-04 | 2495 | 0.333333 | 3.508381 | 2998732 | DPYSL2   |
| 7147.614 | -4354 | 1.54E-04 | 2467 | 0.333333 | 3.508152 | 3001406 | TSPAN7   |
| 6812.172 | -4354 | 1.54E-04 | 2539 | 0.333333 | 3.507692 | 2958538 | ITGA5    |
| 8223.808 | -4354 | 1.54E-04 | 2402 | 0.333333 | 3.507463 | 3132444 | EPCAM    |
| 7184.282 | -4354 | 1.54E-04 | 2621 | 0.333333 | 3.506774 | 2986576 | AMOTL2   |
| 7168.511 | -4354 | 1.54E-04 | 2575 | 0.333333 | 3.506544 | 3016100 | ITGA3    |
| 7017.272 | -4354 | 1.54E-04 | 2741 | 0.333333 | 3.506315 | 2960572 | ADRB2    |
| 7646.91  | -4354 | 1.54E-04 | 2730 | 0.333333 | 3.506315 | 3007464 | RYR3     |
| 6829.611 | -4354 | 1.54E-04 | 2259 | 0.333333 | 3.506085 | 2912102 | S100A11  |
| 7114.442 | -4354 | 1.54E-04 | 2385 | 0.333333 | 3.505855 | 2990690 | EPHB6    |
| 8109.486 | -4354 | 1.54E-04 | 2376 | 0.333333 | 3.504707 | 2941066 | WNT11    |
| 7640.169 | -4354 | 1.54E-04 | 2286 | 0.333333 | 3.50333  | 2969704 | PLCD1    |
| 7047.815 | -4354 | 1.53E-04 | 2419 | 0.333333 | 3.50287  | 2882652 | SLC2A9   |
| 6562.308 | -4354 | 1.53E-04 | 2393 | 0.333333 | 3.50287  | 2872292 | MGLL     |
| 7516.761 | -4354 | 1.53E-04 | 2604 | 0.333333 | 3.502411 | 2999304 | NCK2     |
| 6995.259 | -4354 | 1.53E-04 | 2487 | 0.333333 | 3.502411 | 2920258 | HCLS1    |
| 7248.526 | -4354 | 1.53E-04 | 2322 | 0.333333 | 3.502411 | 2950214 | SMO      |
| 6933.292 | -4354 | 1.53E-04 | 2532 | 0.333333 | 3.501722 | 2903270 | CTSK     |
| 7362.822 | -4354 | 1.53E-04 | 2330 | 0.333333 | 3.501722 | 2987960 | SLC9A3R1 |
| 6871.089 | -4354 | 1.53E-04 | 2571 | 0.333333 | 3.501033 | 2862668 | ANXA5    |
| 7008.023 | -4354 | 1.53E-04 | 2388 | 0.333333 | 3.500574 | 2928346 | FBP1     |
| 6611.671 | -4354 | 1.53E-04 | 2759 | 0.333333 | 3.499656 | 2859032 | CDKN1A   |
| 6644.647 | -4354 | 1.53E-04 | 2526 | 0.333333 | 3.499656 | 2859978 | MYH9     |
| 8073.109 | -4354 | 1.53E-04 | 2712 | 0.333333 | 3.499426 | 2935880 | MUC1     |
| 6682.139 | -4354 | 1.53E-04 | 2628 | 0.333333 | 3.498278 | 2824622 | VCAM1    |
| 7401.388 | -4354 | 1.53E-04 | 2630 | 0.333333 | 3.497589 | 2922526 | CTSO     |
| 7124.514 | -4354 | 1.53E-04 | 2412 | 0.333333 | 3.497359 | 2903774 | MST1R    |
| 7530.919 | -4354 | 1.53E-04 | 2388 | 0.333333 | 3.495982 | 2949730 | RAB5B    |
| 6416.793 | -4354 | 1.53E-04 | 2576 | 0.333333 | 3.495522 | 2821526 | STAT5A   |
| 7951.495 | -4354 | 1.53E-04 | 2808 | 0.333333 | 3.494374 | 2950048 | PRKCQ    |
| 6222.498 | -4354 | 1.53E-04 | 2278 | 0.333333 | 3.494374 | 2761560 | DAAM2    |
| 6753.006 | -4354 | 1.53E-04 | 2669 | 0.333333 | 3.493685 | 2825750 | GNAI2    |

|          |       |          |      |          |          |         |          |
|----------|-------|----------|------|----------|----------|---------|----------|
| 7058.452 | -4354 | 1.53E-04 | 2420 | 0.333333 | 3.493226 | 2860296 | ASS1     |
| 6907.222 | -4354 | 1.52E-04 | 2372 | 0.333333 | 3.492537 | 2853156 | JUP      |
| 6654.283 | -4354 | 1.52E-04 | 2208 | 0.333333 | 3.492537 | 2756946 | NPPA     |
| 7098.195 | -4354 | 1.52E-04 | 2315 | 0.333333 | 3.492078 | 2849276 | S1PR4    |
| 7314.629 | -4354 | 1.52E-04 | 2304 | 0.333333 | 3.492078 | 2887494 | MDK      |
| 6335.078 | -4354 | 1.52E-04 | 2399 | 0.333333 | 3.491848 | 2772322 | LAMB3    |
| 7553.685 | -4354 | 1.52E-04 | 2486 | 0.333333 | 3.491389 | 2888716 | CACNG3   |
| 6802.261 | -4354 | 1.52E-04 | 2487 | 0.333333 | 3.49093  | 2770212 | PRKCD    |
| 6885.069 | -4354 | 1.52E-04 | 2326 | 0.333333 | 3.4907   | 2724014 | CER1     |
| 6812.06  | -4354 | 1.52E-04 | 2206 | 0.333333 | 3.4907   | 2801574 | NUPR1    |
| 6295.689 | -4354 | 1.52E-04 | 2396 | 0.333333 | 3.490471 | 2718346 | IFNGR2   |
| 7587.883 | -4354 | 1.52E-04 | 2699 | 0.333333 | 3.490241 | 2863048 | HDAC1    |
| 7042.02  | -4354 | 1.52E-04 | 2626 | 0.333333 | 3.490241 | 2810612 | GHR      |
| 6378.446 | -4354 | 1.52E-04 | 2409 | 0.333333 | 3.489552 | 2746312 | S1PR1    |
| 6939.808 | -4354 | 1.52E-04 | 2446 | 0.333333 | 3.489093 | 2814474 | IL2RG    |
| 6506.717 | -4354 | 1.52E-04 | 2309 | 0.333333 | 3.488175 | 2723340 | COX7A1   |
| 7100.696 | -4354 | 1.52E-04 | 2630 | 0.333333 | 3.487945 | 2810736 | EGLN3    |
| 6111.27  | -4354 | 1.52E-04 | 2242 | 0.333333 | 3.487945 | 2716720 | EFNB1    |
| 9568.737 | -4354 | 1.52E-04 | 2503 | 0.333333 | 3.487715 | 3497026 | UVRAG    |
| 6030.262 | -4354 | 1.52E-04 | 2536 | 0.333333 | 3.487026 | 2680350 | F3       |
| 6470.696 | -4354 | 1.52E-04 | 2281 | 0.333333 | 3.487026 | 2748416 | FOSL1    |
| 7296.213 | -4354 | 1.52E-04 | 2585 | 0.333333 | 3.486797 | 2793308 | DPF3     |
| 6444.257 | -4354 | 1.52E-04 | 2174 | 0.333333 | 3.486567 | 2687322 | FBP2     |
| 6274.811 | -4354 | 1.52E-04 | 2390 | 0.333333 | 3.486108 | 2699008 | RPRM     |
| 5968.001 | -4354 | 1.52E-04 | 2313 | 0.333333 | 3.485649 | 2660348 | TCN2     |
| 6148.049 | -4354 | 1.52E-04 | 2300 | 0.333333 | 3.485649 | 2676750 | KLK6     |
| 7814.423 | -4354 | 1.52E-04 | 2591 | 0.333333 | 3.48496  | 3193632 | TLR4     |
| 6513.498 | -4354 | 1.52E-04 | 2451 | 0.333333 | 3.48496  | 2656592 | AVPR1B   |
| 6783.592 | -4354 | 1.52E-04 | 2626 | 0.333333 | 3.48473  | 2731124 | ACVR1    |
| 6973.639 | -4354 | 1.52E-04 | 2487 | 0.333333 | 3.48473  | 2713962 | ISL1     |
| 7165.387 | -4354 | 1.52E-04 | 2645 | 0.333333 | 3.484501 | 2775032 | CTNNA2   |
| 7319.46  | -4354 | 1.52E-04 | 2567 | 0.333333 | 3.484501 | 2812884 | PRKCZ    |
| 6677.991 | -4354 | 1.52E-04 | 2365 | 0.333333 | 3.484501 | 2714476 | CDH17    |
| 7241.925 | -4354 | 1.52E-04 | 2583 | 0.333333 | 3.484271 | 2782826 | PINK1    |
| 6204.59  | -4354 | 1.52E-04 | 2766 | 0.333333 | 3.484041 | 2645334 | BMP2     |
| 5811.944 | -4354 | 1.52E-04 | 2463 | 0.333333 | 3.483582 | 2595714 | TNFRSF1A |
| 7193.379 | -4354 | 1.52E-04 | 2412 | 0.333333 | 3.483582 | 2811116 | PLCB3    |
| 6705.112 | -4354 | 1.52E-04 | 2289 | 0.333333 | 3.483352 | 2699808 | CNTFR    |
| 6843.285 | -4354 | 1.52E-04 | 2183 | 0.333333 | 3.483352 | 2673176 | IFNA4    |
| 5949.132 | -4354 | 1.51E-04 | 2209 | 0.333333 | 3.482664 | 2588652 | GGT5     |
| 5855.002 | -4354 | 1.51E-04 | 2220 | 0.333333 | 3.482204 | 2607718 | GP1BA    |

|          |       |          |      |          |          |         |          |
|----------|-------|----------|------|----------|----------|---------|----------|
| 6855.473 | -4354 | 1.51E-04 | 2577 | 0.333333 | 3.481975 | 2773168 | SKAP1    |
| 5947.62  | -4354 | 1.51E-04 | 2356 | 0.333333 | 3.481975 | 2596340 | RASSF2   |
| 8405.252 | -4354 | 1.51E-04 | 2534 | 0.333333 | 3.481745 | 2783636 | GSTP1    |
| 11086.15 | -4354 | 1.51E-04 | 2349 | 0.333333 | 3.481515 | 4324896 | ENO2     |
| 6438.383 | -4354 | 1.51E-04 | 2674 | 0.333333 | 3.481286 | 2675602 | PTPRM    |
| 6916.774 | -4354 | 1.51E-04 | 2226 | 0.333333 | 3.481286 | 2703518 | COX6A2   |
| 6603.512 | -4354 | 1.51E-04 | 2232 | 0.333333 | 3.480597 | 2710450 | HLA-A    |
| 6709.913 | -4354 | 1.51E-04 | 2698 | 0.333333 | 3.480367 | 2724592 | ABL1     |
| 5575.243 | -4354 | 1.51E-04 | 2193 | 0.333333 | 3.480367 | 2543568 | C1R      |
| 5924.511 | -4354 | 1.51E-04 | 2385 | 0.333333 | 3.480138 | 2600534 | INHBB    |
| 5828.161 | -4354 | 1.51E-04 | 2373 | 0.333333 | 3.480138 | 2558096 | C3       |
| 5730.137 | -4354 | 1.51E-04 | 2338 | 0.333333 | 3.479679 | 2547444 | SERPING1 |
| 6145.915 | -4354 | 1.51E-04 | 2285 | 0.333333 | 3.479679 | 2609076 | SERPINA5 |
| 5833.518 | -4354 | 1.51E-04 | 2463 | 0.333333 | 3.479219 | 2609074 | PDGFRB   |
| 6865.294 | -4354 | 1.51E-04 | 2305 | 0.333333 | 3.479219 | 2694412 | OGDHL    |
| 6896.287 | -4354 | 1.51E-04 | 2439 | 0.333333 | 3.47899  | 2719126 | NR3C2    |
| 6252.726 | -4354 | 1.51E-04 | 2261 | 0.333333 | 3.47899  | 2609864 | SERPINA3 |
| 6183.098 | -4354 | 1.51E-04 | 2210 | 0.333333 | 3.47899  | 2582038 | HSPB2    |
| 6624.539 | -4354 | 1.51E-04 | 2320 | 0.333333 | 3.47876  | 2607452 | BMP15    |
| 6789.075 | -4354 | 1.51E-04 | 2580 | 0.333333 | 3.478071 | 2639610 | C8A      |
| 6353.056 | -4354 | 1.51E-04 | 2286 | 0.333333 | 3.477842 | 2602214 | CA9      |
| 5712.603 | -4354 | 1.51E-04 | 2320 | 0.333333 | 3.477612 | 2552750 | IL4R     |
| 6025.562 | -4354 | 1.51E-04 | 2239 | 0.333333 | 3.477612 | 2567390 | ARPC1B   |
| 5998.723 | -4354 | 1.51E-04 | 2289 | 0.333333 | 3.477153 | 2586024 | ALDH2    |
| 5655.426 | -4354 | 1.51E-04 | 2346 | 0.333333 | 3.476923 | 2555530 | TGFB1    |
| 6040.376 | -4354 | 1.51E-04 | 2414 | 0.333333 | 3.476464 | 2564412 | RELN     |
| 5789.684 | -4354 | 1.51E-04 | 2267 | 0.333333 | 3.476464 | 2559458 | FLNC     |
| 6239.062 | -4354 | 1.51E-04 | 2365 | 0.333333 | 3.476234 | 2621262 | CXCR1    |
| 7120.879 | -4354 | 1.51E-04 | 2312 | 0.333333 | 3.475545 | 2595944 | SDCBP    |
| 6271.559 | -4354 | 1.51E-04 | 2226 | 0.333333 | 3.475316 | 2571298 | LTA      |
| 5546.761 | -4354 | 1.51E-04 | 2397 | 0.333333 | 3.475086 | 2519034 | PLPP3    |
| 6401.486 | -4354 | 1.51E-04 | 2119 | 0.333333 | 3.475086 | 2563576 | CEND1    |
| 5782.797 | -4354 | 1.51E-04 | 2181 | 0.333333 | 3.474856 | 2543516 | CTSE     |
| 6039.734 | -4354 | 1.51E-04 | 2195 | 0.333333 | 3.474627 | 2544164 | CD1A     |
| 6006.239 | -4354 | 1.51E-04 | 2542 | 0.333333 | 3.474168 | 2552328 | KCTD12   |
| 5606.393 | -4354 | 1.51E-04 | 2179 | 0.333333 | 3.473708 | 2459374 | AMHR2    |
| 6064.587 | -4354 | 1.51E-04 | 2346 | 0.333333 | 3.473479 | 2586744 | EPHA2    |
| 5847.403 | -4354 | 1.51E-04 | 2167 | 0.333333 | 3.473479 | 2532662 | FKBP10   |
| 6754.189 | -4354 | 1.51E-04 | 2923 | 0.333333 | 3.473249 | 2679420 | MYC      |
| 6045.947 | -4354 | 1.51E-04 | 2107 | 0.333333 | 3.473249 | 2565420 | SULT2B1  |
| 6457.838 | -4354 | 1.50E-04 | 2438 | 0.333333 | 3.47302  | 2596412 | PTPN6    |

|          |       |          |      |          |          |         |          |
|----------|-------|----------|------|----------|----------|---------|----------|
| 5771.974 | -4354 | 1.50E-04 | 2412 | 0.333333 | 3.47302  | 2544970 | PIK3R5   |
| 5787.13  | -4354 | 1.50E-04 | 2276 | 0.333333 | 3.47302  | 2515050 | RGL1     |
| 6407.033 | -4354 | 1.50E-04 | 2198 | 0.333333 | 3.47279  | 2559818 | MLXIPL   |
| 5816.438 | -4354 | 1.50E-04 | 2369 | 0.333333 | 3.47256  | 2535804 | LOXL1    |
| 6605.176 | -4354 | 1.50E-04 | 2332 | 0.333333 | 3.472331 | 2612164 | SPTA1    |
| 5711.981 | -4354 | 1.50E-04 | 2321 | 0.333333 | 3.472331 | 2522144 | NDRG1    |
| 6379.308 | -4354 | 1.50E-04 | 2347 | 0.333333 | 3.471642 | 2610180 | UNC13B   |
| 6016.963 | -4354 | 1.50E-04 | 2280 | 0.333333 | 3.471412 | 2527084 | RHOG     |
| 6136.328 | -4354 | 1.50E-04 | 2210 | 0.333333 | 3.471183 | 2477184 | HAND1    |
| 5972.438 | -4354 | 1.50E-04 | 2459 | 0.333333 | 3.470953 | 2531318 | CSF3R    |
| 6690.207 | -4354 | 1.50E-04 | 2424 | 0.333333 | 3.470494 | 2632614 | TERF2IP  |
| 6043.392 | -4354 | 1.50E-04 | 2228 | 0.333333 | 3.470494 | 2474702 | NR0B2    |
| 5709.605 | -4354 | 1.50E-04 | 2121 | 0.333333 | 3.470264 | 2460922 | MADCAM1  |
| 5623.161 | -4354 | 1.50E-04 | 2339 | 0.333333 | 3.469805 | 2465248 | CSF1R    |
| 5955.283 | -4354 | 1.50E-04 | 2129 | 0.333333 | 3.469805 | 2504822 | SERPINF1 |
| 6588.38  | -4354 | 1.50E-04 | 2433 | 0.333333 | 3.469346 | 2553120 | IL10RB   |
| 6430.08  | -4354 | 1.50E-04 | 2443 | 0.333333 | 3.469116 | 2523390 | MAP2K1   |
| 6949.446 | -4354 | 1.50E-04 | 2412 | 0.333333 | 3.468886 | 2634152 | NTRK1    |
| 6069.71  | -4354 | 1.50E-04 | 2157 | 0.333333 | 3.468886 | 2468852 | NCAN     |
| 5748.887 | -4354 | 1.50E-04 | 2223 | 0.333333 | 3.468657 | 2509974 | CRYM     |
| 5930.131 | -4354 | 1.50E-04 | 2384 | 0.333333 | 3.468427 | 2536390 | VLDLR    |
| 7090.596 | -4354 | 1.50E-04 | 2475 | 0.333333 | 3.468197 | 2625274 | GAPDH    |
| 5954.234 | -4354 | 1.50E-04 | 2263 | 0.333333 | 3.467968 | 2484778 | ATP6V1B2 |
| 5850.236 | -4354 | 1.50E-04 | 2256 | 0.333333 | 3.467738 | 2470178 | REM1     |
| 5829.406 | -4354 | 1.50E-04 | 2180 | 0.333333 | 3.467738 | 2505872 | LILRA4   |
| 6346.104 | -4354 | 1.50E-04 | 2108 | 0.333333 | 3.467738 | 2477066 | IFNA10   |
| 6421.64  | -4354 | 1.50E-04 | 2423 | 0.333333 | 3.467509 | 2542312 | PBX3     |
| 6083.904 | -4354 | 1.50E-04 | 2335 | 0.333333 | 3.467509 | 2540428 | ABCG2    |
| 5629.377 | -4354 | 1.50E-04 | 2147 | 0.333333 | 3.467509 | 2439778 | PLIN1    |
| 5700.384 | -4354 | 1.50E-04 | 2362 | 0.333333 | 3.467049 | 2465112 | MYD88    |
| 5739.239 | -4354 | 1.50E-04 | 2246 | 0.333333 | 3.467049 | 2500470 | RAB13    |
| 6903.435 | -4354 | 1.50E-04 | 2241 | 0.333333 | 3.467049 | 2840158 | PLA2G2A  |
| 5461.315 | -4354 | 1.50E-04 | 2561 | 0.333333 | 3.46682  | 2464834 | CAV1     |
| 5770.896 | -4354 | 1.50E-04 | 2224 | 0.333333 | 3.46682  | 2490558 | INPP1    |
| 7772.632 | -4354 | 1.50E-04 | 2076 | 0.333333 | 3.46682  | 2660308 | BIRC7    |
| 5887.365 | -4354 | 1.50E-04 | 2058 | 0.333333 | 3.466361 | 2517878 | DTX4     |
| 6024.802 | -4354 | 1.50E-04 | 2212 | 0.333333 | 3.466131 | 2494830 | SLC22A4  |
| 5904.269 | -4354 | 1.50E-04 | 2314 | 0.333333 | 3.465901 | 2478694 | C4BPB    |
| 5898.308 | -4354 | 1.50E-04 | 2262 | 0.333333 | 3.465901 | 2507826 | STAT4    |
| 6377.759 | -4354 | 1.50E-04 | 2312 | 0.333333 | 3.465672 | 2547788 | AP1B1    |
| 5163.854 | -4354 | 1.50E-04 | 2177 | 0.333333 | 3.465672 | 2399756 | SELP     |

|          |       |          |      |          |          |         |          |
|----------|-------|----------|------|----------|----------|---------|----------|
| 6152.74  | -4354 | 1.50E-04 | 2424 | 0.333333 | 3.465442 | 2501778 | PTPRZ1   |
| 5192.168 | -4354 | 1.50E-04 | 2055 | 0.333333 | 3.465442 | 2390256 | MFAP4    |
| 5987.848 | -4354 | 1.50E-04 | 2380 | 0.333333 | 3.464753 | 2485014 | PRKAR2B  |
| 5653.584 | -4354 | 1.50E-04 | 2383 | 0.333333 | 3.464294 | 2422020 | HCK      |
| 6117.158 | -4354 | 1.50E-04 | 2179 | 0.333333 | 3.464294 | 2521236 | ACADS    |
| 5402.987 | -4354 | 1.50E-04 | 2377 | 0.333333 | 3.463835 | 2388030 | NGFR     |
| 6132.181 | -4354 | 1.50E-04 | 2318 | 0.333333 | 3.463146 | 2464856 | GCH1     |
| 6021.397 | -4354 | 1.50E-04 | 2138 | 0.333333 | 3.463146 | 2447100 | GP9      |
| 11672.08 | -4354 | 1.49E-04 | 2934 | 0.333333 | 3.462916 | 4357904 | EGFR     |
| 6533.299 | -4354 | 1.49E-04 | 2196 | 0.333333 | 3.462687 | 2534280 | TNFRSF14 |
| 6268.366 | -4354 | 1.49E-04 | 2363 | 0.333333 | 3.462227 | 2458154 | ILK      |
| 5984.217 | -4354 | 1.49E-04 | 2356 | 0.333333 | 3.462227 | 2450372 | ADORA2B  |
| 5837.333 | -4354 | 1.49E-04 | 2062 | 0.333333 | 3.462227 | 2431142 | TFF1     |
| 6021.137 | -4354 | 1.49E-04 | 2370 | 0.333333 | 3.461998 | 2423516 | GNG3     |
| 6432.338 | -4354 | 1.49E-04 | 2078 | 0.333333 | 3.461768 | 2540804 | ADIPOR1  |
| 5385.509 | -4354 | 1.49E-04 | 2236 | 0.333333 | 3.461309 | 2381282 | CRYAB    |
| 5699.134 | -4354 | 1.49E-04 | 2154 | 0.333333 | 3.461079 | 2416390 | ALDH1A1  |
| 5364.132 | -4354 | 1.49E-04 | 2249 | 0.333333 | 3.46039  | 2350796 | TNFRSF1B |
| 7056.643 | -4354 | 1.49E-04 | 2184 | 0.333333 | 3.46039  | 2830414 | MMP7     |
| 5605.589 | -4354 | 1.49E-04 | 2119 | 0.333333 | 3.46039  | 2372752 | IL22RA1  |
| 5851.821 | -4354 | 1.49E-04 | 2116 | 0.333333 | 3.46039  | 2468864 | CD70     |
| 5934.443 | -4354 | 1.49E-04 | 2226 | 0.333333 | 3.460161 | 2504820 | FRAT1    |
| 5828.532 | -4354 | 1.49E-04 | 2123 | 0.333333 | 3.460161 | 2400002 | IFNA14   |
| 5564.142 | -4354 | 1.49E-04 | 2485 | 0.333333 | 3.459931 | 2384352 | AHR      |
| 5639.018 | -4354 | 1.49E-04 | 2061 | 0.333333 | 3.459701 | 2354770 | TM4SF5   |
| 6321.497 | -4354 | 1.49E-04 | 2539 | 0.333333 | 3.459472 | 2447306 | IQGAP2   |
| 5800.702 | -4354 | 1.49E-04 | 2479 | 0.333333 | 3.459472 | 2436484 | KIT      |
| 5989.608 | -4354 | 1.49E-04 | 2427 | 0.333333 | 3.459472 | 2462952 | ACTN4    |
| 6008.859 | -4354 | 1.49E-04 | 2188 | 0.333333 | 3.459242 | 2448260 | IMPA2    |
| 5645.264 | -4354 | 1.49E-04 | 2123 | 0.333333 | 3.459013 | 2352222 | TUBB6    |
| 6641.196 | -4354 | 1.49E-04 | 2229 | 0.333333 | 3.458783 | 2521528 | PFN2     |
| 5541.478 | -4354 | 1.49E-04 | 2184 | 0.333333 | 3.458553 | 2381370 | VASP     |
| 5998.754 | -4354 | 1.49E-04 | 2182 | 0.333333 | 3.458553 | 2431700 | ARHGEF6  |
| 5363.124 | -4354 | 1.49E-04 | 2138 | 0.333333 | 3.458553 | 2339988 | PDE1B    |
| 5922.168 | -4354 | 1.49E-04 | 2449 | 0.333333 | 3.458324 | 2446246 | ABLIM1   |
| 5200.439 | -4354 | 1.49E-04 | 2260 | 0.333333 | 3.458324 | 2338444 | CEBPB    |
| 5921.601 | -4354 | 1.49E-04 | 2351 | 0.333333 | 3.458094 | 2456060 | STXBP1   |
| 5690.345 | -4354 | 1.49E-04 | 2187 | 0.333333 | 3.458094 | 2405410 | CA2      |
| 6061.406 | -4354 | 1.49E-04 | 2343 | 0.333333 | 3.457865 | 2369648 | NGF      |
| 5539.532 | -4354 | 1.49E-04 | 2155 | 0.333333 | 3.457635 | 2377426 | CNTNAP1  |
| 6052.148 | -4354 | 1.49E-04 | 2629 | 0.333333 | 3.457405 | 2445048 | PRKCE    |

|          |       |          |      |          |          |         |          |
|----------|-------|----------|------|----------|----------|---------|----------|
| 5582.014 | -4354 | 1.49E-04 | 2218 | 0.333333 | 3.457405 | 2350372 | CSF2RB   |
| 5815.06  | -4354 | 1.49E-04 | 2155 | 0.333333 | 3.457405 | 2407334 | LAMB2    |
| 6271.427 | -4354 | 1.49E-04 | 2958 | 0.333333 | 3.457176 | 2453548 | PIK3R1   |
| 6772.728 | -4354 | 1.49E-04 | 2484 | 0.333333 | 3.457176 | 2465864 | SNCA     |
| 6318.013 | -4354 | 1.49E-04 | 2250 | 0.333333 | 3.457176 | 2347722 | HPSE2    |
| 6045.365 | -4354 | 1.49E-04 | 2498 | 0.333333 | 3.456716 | 2391090 | ID2      |
| 6201.323 | -4354 | 1.49E-04 | 2308 | 0.333333 | 3.456487 | 2477538 | CD3E     |
| 5440.763 | -4354 | 1.49E-04 | 2167 | 0.333333 | 3.456257 | 2391016 | NFE2     |
| 6950.656 | -4354 | 1.49E-04 | 2408 | 0.333333 | 3.456028 | 2469920 | HADHB    |
| 6095.119 | -4354 | 1.49E-04 | 2302 | 0.333333 | 3.456028 | 2399228 | SGCG     |
| 5591.664 | -4354 | 1.49E-04 | 2273 | 0.333333 | 3.456028 | 2347354 | HSD17B2  |
| 5654.064 | -4354 | 1.49E-04 | 2042 | 0.333333 | 3.455568 | 2345256 | G6PC2    |
| 5865.667 | -4354 | 1.49E-04 | 2108 | 0.333333 | 3.455339 | 2403694 | FGD1     |
| 5798.7   | -4354 | 1.49E-04 | 2355 | 0.333333 | 3.455109 | 2333044 | TACR2    |
| 4689.095 | -4354 | 1.49E-04 | 2293 | 0.333333 | 3.45442  | 2196210 | APLNR    |
| 6026.866 | -4354 | 1.49E-04 | 2167 | 0.333333 | 3.45442  | 2379818 | TUBA4A   |
| 5709.856 | -4354 | 1.49E-04 | 2397 | 0.333333 | 3.454191 | 2387516 | ROBO1    |
| 6341.471 | -4354 | 1.49E-04 | 2292 | 0.333333 | 3.454191 | 2467312 | CTNNBIP1 |
| 5496.154 | -4354 | 1.49E-04 | 2496 | 0.333333 | 3.453961 | 2375972 | IRS2     |
| 6078.934 | -4354 | 1.49E-04 | 2355 | 0.333333 | 3.453961 | 2347568 | GJA1     |
| 5208.954 | -4354 | 1.49E-04 | 2269 | 0.333333 | 3.453961 | 2326848 | FES      |
| 6020.294 | -4354 | 1.49E-04 | 2155 | 0.333333 | 3.453961 | 2345564 | NPC2     |
| 4948.9   | -4354 | 1.49E-04 | 2127 | 0.333333 | 3.453961 | 2256558 | HSD11B1  |
| 5895.044 | -4354 | 1.49E-04 | 2373 | 0.333333 | 3.453731 | 2368292 | LIPC     |
| 5436.153 | -4354 | 1.49E-04 | 2317 | 0.333333 | 3.453731 | 2282750 | FSHR     |
| 5750.723 | -4354 | 1.49E-04 | 2224 | 0.333333 | 3.453731 | 2310712 | GRPR     |
| 5352.331 | -4354 | 1.49E-04 | 2113 | 0.333333 | 3.453731 | 2272864 | CSF3     |
| 5559.986 | -4354 | 1.49E-04 | 2060 | 0.333333 | 3.453731 | 2353262 | RIN1     |
| 6201.85  | -4354 | 1.49E-04 | 2094 | 0.333333 | 3.453272 | 2367648 | HYAL2    |
| 5390.125 | -4354 | 1.49E-04 | 2034 | 0.333333 | 3.453272 | 2283906 | KLK11    |
| 6771.834 | -4354 | 1.49E-04 | 2296 | 0.333333 | 3.453042 | 2401622 | GBE1     |
| 4929.404 | -4354 | 1.49E-04 | 2259 | 0.333333 | 3.453042 | 2259022 | SLCO2A1  |
| 6004.864 | -4354 | 1.49E-04 | 2257 | 0.333333 | 3.453042 | 2411676 | LAMA5    |
| 5303.859 | -4354 | 1.49E-04 | 2178 | 0.333333 | 3.453042 | 2335490 | ELMO1    |
| 5800.818 | -4354 | 1.49E-04 | 2156 | 0.333333 | 3.453042 | 2406160 | SLC7A5   |
| 5474.036 | -4354 | 1.49E-04 | 2163 | 0.333333 | 3.452583 | 2369424 | P2RY2    |
| 5671.145 | -4354 | 1.49E-04 | 2162 | 0.333333 | 3.452583 | 2362208 | ITPKA    |
| 6259.541 | -4354 | 1.49E-04 | 2143 | 0.333333 | 3.452583 | 2438716 | RNF43    |
| 6093.943 | -4354 | 1.48E-04 | 2260 | 0.333333 | 3.452354 | 2437046 | PHGDH    |
| 5787.872 | -4354 | 1.48E-04 | 2159 | 0.333333 | 3.452354 | 2347184 | TALDO1   |
| 5279.011 | -4354 | 1.48E-04 | 2085 | 0.333333 | 3.452354 | 2307536 | LIPG     |



|          |       |          |      |          |          |         |          |
|----------|-------|----------|------|----------|----------|---------|----------|
| 6268.659 | -4354 | 1.48E-04 | 2105 | 0.333333 | 3.452124 | 2360558 | LAPTM4A  |
| 5989.165 | -4354 | 1.48E-04 | 2569 | 0.333333 | 3.451894 | 2368128 | DLG2     |
| 5284.586 | -4354 | 1.48E-04 | 2067 | 0.333333 | 3.451894 | 2276226 | KISS1    |
| 5869.997 | -4354 | 1.48E-04 | 2288 | 0.333333 | 3.451665 | 2358948 | BAAT     |
| 5556.393 | -4354 | 1.48E-04 | 2245 | 0.333333 | 3.451665 | 2334362 | SPI1     |
| 5532.132 | -4354 | 1.48E-04 | 2140 | 0.333333 | 3.451665 | 2330612 | CYP4F2   |
| 5475.813 | -4354 | 1.48E-04 | 2081 | 0.333333 | 3.451665 | 2344662 | S100A2   |
| 5697.112 | -4354 | 1.48E-04 | 2143 | 0.333333 | 3.451435 | 2346808 | LDHA     |
| 5412.155 | -4354 | 1.48E-04 | 2457 | 0.333333 | 3.451206 | 2318060 | GLI3     |
| 5192.454 | -4354 | 1.48E-04 | 2263 | 0.333333 | 3.450976 | 2298850 | TNFRSF21 |
| 6004.651 | -4354 | 1.48E-04 | 2518 | 0.333333 | 3.450746 | 2354890 | BIRC3    |
| 7020.97  | -4354 | 1.48E-04 | 2472 | 0.333333 | 3.450746 | 2463738 | SOD1     |
| 6327.158 | -4354 | 1.48E-04 | 2290 | 0.333333 | 3.450746 | 2317184 | SLC2A2   |
| 7247.366 | -4354 | 1.48E-04 | 2976 | 0.333333 | 3.450057 | 2453812 | YWHAE    |
| 4940.525 | -4354 | 1.48E-04 | 2164 | 0.333333 | 3.450057 | 2227800 | GPX3     |
| 6021.162 | -4354 | 1.48E-04 | 2145 | 0.333333 | 3.450057 | 2396784 | CDC25B   |
| 5421.653 | -4354 | 1.48E-04 | 2194 | 0.333333 | 3.449828 | 2282296 | C4BPA    |
| 5331.759 | -4354 | 1.48E-04 | 2301 | 0.333333 | 3.449598 | 2276060 | HIF1A    |
| 7763.966 | -4354 | 1.48E-04 | 2408 | 0.333333 | 3.449369 | 2451456 | ATP5F1B  |
| 5883.988 | -4354 | 1.48E-04 | 2214 | 0.333333 | 3.449369 | 2348690 | MGST2    |
| 5147.786 | -4354 | 1.48E-04 | 2176 | 0.333333 | 3.449369 | 2270794 | SNAI2    |
| 5659.349 | -4354 | 1.48E-04 | 2105 | 0.333333 | 3.449369 | 2293666 | ATP6V0D1 |
| 5558.236 | -4354 | 1.48E-04 | 2272 | 0.333333 | 3.449139 | 2305404 | ARRB2    |
| 6394.372 | -4354 | 1.48E-04 | 2485 | 0.333333 | 3.448909 | 2386300 | DAPK1    |
| 5635.555 | -4354 | 1.48E-04 | 2502 | 0.333333 | 3.44868  | 2332784 | ACVR2A   |
| 6338.321 | -4354 | 1.48E-04 | 2452 | 0.333333 | 3.44868  | 2323778 | TACR3    |
| 5109.726 | -4354 | 1.48E-04 | 2141 | 0.333333 | 3.44845  | 2249810 | PDE2A    |
| 5740.138 | -4354 | 1.48E-04 | 2053 | 0.333333 | 3.44845  | 2316814 | CCL22    |
| 6017.307 | -4354 | 1.48E-04 | 2602 | 0.333333 | 3.44822  | 2354734 | PPP3CA   |
| 6032.578 | -4354 | 1.48E-04 | 2129 | 0.333333 | 3.44822  | 2266232 | HYAL1    |
| 5448.545 | -4354 | 1.48E-04 | 2312 | 0.333333 | 3.447991 | 2314170 | PROC     |
| 5348.751 | -4354 | 1.48E-04 | 2209 | 0.333333 | 3.447991 | 2285516 | SMAD7    |
| 5551.423 | -4354 | 1.48E-04 | 2509 | 0.333333 | 3.447532 | 2302640 | GNAI1    |
| 4985.154 | -4354 | 1.48E-04 | 2455 | 0.333333 | 3.447532 | 2211424 | KDR      |
| 5354.72  | -4354 | 1.48E-04 | 2010 | 0.333333 | 3.447532 | 2222200 | ADGRB1   |
| 4826.896 | -4354 | 1.48E-04 | 2279 | 0.333333 | 3.447072 | 2209324 | CDH5     |
| 6529.301 | -4354 | 1.48E-04 | 2154 | 0.333333 | 3.447072 | 2411528 | HAGH     |
| 6101.806 | -4354 | 1.48E-04 | 2520 | 0.333333 | 3.446843 | 2353802 | PBX1     |
| 5220.807 | -4354 | 1.48E-04 | 2131 | 0.333333 | 3.446843 | 2227018 | CYFIP1   |
| 4789.519 | -4354 | 1.48E-04 | 2094 | 0.333333 | 3.446843 | 2148724 | WNT2     |
| 5444.609 | -4354 | 1.48E-04 | 2001 | 0.333333 | 3.446843 | 2280740 | ACOX2    |

|          |       |          |      |          |          |         |         |
|----------|-------|----------|------|----------|----------|---------|---------|
| 6160.221 | -4354 | 1.48E-04 | 1990 | 0.333333 | 3.446843 | 2381094 | ATG2A   |
| 5959.325 | -4354 | 1.48E-04 | 2060 | 0.333333 | 3.446383 | 2293354 | VAMP8   |
| 5181.836 | -4354 | 1.48E-04 | 2091 | 0.333333 | 3.446154 | 2208544 | SLN     |
| 5730.772 | -4354 | 1.48E-04 | 2324 | 0.333333 | 3.445924 | 2299018 | SGMS1   |
| 5092.561 | -4354 | 1.48E-04 | 2225 | 0.333333 | 3.445924 | 2240130 | CTSH    |
| 6136.032 | -4354 | 1.48E-04 | 2203 | 0.333333 | 3.445924 | 2395388 | PFKM    |
| 5031.549 | -4354 | 1.48E-04 | 2047 | 0.333333 | 3.445924 | 2182240 | TIMP1   |
| 5628.834 | -4354 | 1.48E-04 | 2016 | 0.333333 | 3.445924 | 2316232 | PLPP2   |
| 5888.988 | -4354 | 1.48E-04 | 2297 | 0.333333 | 3.445695 | 2315822 | LBR     |
| 7674.968 | -4354 | 1.48E-04 | 2527 | 0.333333 | 3.445465 | 2402956 | UQCRCF1 |
| 5587.659 | -4354 | 1.48E-04 | 2351 | 0.333333 | 3.445465 | 2249228 | HLA-DRA |
| 4869.64  | -4354 | 1.48E-04 | 2328 | 0.333333 | 3.445235 | 2201580 | FLNA    |
| 5074.88  | -4354 | 1.48E-04 | 2300 | 0.333333 | 3.445235 | 2209778 | ALOX5AP |
| 5868.427 | -4354 | 1.48E-04 | 2135 | 0.333333 | 3.445235 | 2223510 | HEXB    |
| 5978.41  | -4354 | 1.48E-04 | 2301 | 0.333333 | 3.445006 | 2343076 | ICOS    |
| 5567.762 | -4354 | 1.48E-04 | 2242 | 0.333333 | 3.445006 | 2285710 | HSPB1   |
| 5410.346 | -4354 | 1.48E-04 | 2088 | 0.333333 | 3.445006 | 2213616 | RGN     |
| 4796.269 | -4354 | 1.48E-04 | 2183 | 0.333333 | 3.444776 | 2190898 | FGR     |
| 5446.779 | -4354 | 1.48E-04 | 2160 | 0.333333 | 3.444776 | 2287160 | STAR    |
| 5656.296 | -4354 | 1.48E-04 | 2105 | 0.333333 | 3.444776 | 2274880 | NCOA4   |
| 5441.234 | -4354 | 1.48E-04 | 2035 | 0.333333 | 3.444546 | 2263906 | RELB    |
| 4856.651 | -4354 | 1.48E-04 | 2173 | 0.333333 | 3.444317 | 2157286 | C1S     |
| 5433.181 | -4354 | 1.48E-04 | 2049 | 0.333333 | 3.444317 | 2185902 | IFNA5   |
| 5779.817 | -4354 | 1.48E-04 | 2271 | 0.333333 | 3.444087 | 2250638 | ASIC2   |
| 5923.149 | -4354 | 1.48E-04 | 2249 | 0.333333 | 3.443858 | 2256798 | PDHA2   |
| 5637.429 | -4354 | 1.48E-04 | 2110 | 0.333333 | 3.443858 | 2261016 | GNG5    |
| 6330.641 | -4354 | 1.48E-04 | 1985 | 0.333333 | 3.443858 | 2368356 | CLDN8   |
| 5280.684 | -4354 | 1.48E-04 | 1987 | 0.333333 | 3.443628 | 2179978 | SLC10A1 |
| 5306.193 | -4354 | 1.48E-04 | 2231 | 0.333333 | 3.443398 | 2233226 | GNB3    |
| 6287.703 | -4354 | 1.48E-04 | 2451 | 0.333333 | 3.443169 | 2331472 | PSMD2   |
| 5638.499 | -4354 | 1.48E-04 | 1991 | 0.333333 | 3.443169 | 2284522 | CLDN5   |
| 4889.736 | -4354 | 1.48E-04 | 2064 | 0.333333 | 3.442939 | 2190358 | MRAS    |
| 5706.085 | -4354 | 1.48E-04 | 2218 | 0.333333 | 3.44271  | 2243032 | MTTP    |
| 5594.018 | -4354 | 1.48E-04 | 2152 | 0.333333 | 3.44271  | 2194732 | CCL21   |
| 6211.971 | -4354 | 1.48E-04 | 2352 | 0.333333 | 3.44248  | 2353666 | KDM1A   |
| 7165.338 | -4354 | 1.48E-04 | 2187 | 0.333333 | 3.44248  | 2669038 | CHMP2A  |
| 4809.859 | -4354 | 1.48E-04 | 2007 | 0.333333 | 3.44248  | 2147194 | S100A4  |
| 5389.772 | -4354 | 1.48E-04 | 2085 | 0.333333 | 3.44225  | 2223934 | CASQ1   |
| 5121.735 | -4354 | 1.47E-04 | 2114 | 0.333333 | 3.442021 | 2161398 | F10     |
| 5538.484 | -4354 | 1.47E-04 | 2102 | 0.333333 | 3.442021 | 2271682 | ITGB7   |
| 5691.922 | -4354 | 1.47E-04 | 2108 | 0.333333 | 3.441791 | 2266516 | DUSP4   |

|          |       |          |      |          |          |         |         |
|----------|-------|----------|------|----------|----------|---------|---------|
| 4987.932 | -4354 | 1.47E-04 | 2415 | 0.333333 | 3.441561 | 2141942 | LYN     |
| 5272.083 | -4354 | 1.47E-04 | 2250 | 0.333333 | 3.441332 | 2243172 | ABCC2   |
| 4709.454 | -4354 | 1.47E-04 | 1949 | 0.333333 | 3.441332 | 2173478 | NBL1    |
| 5066.103 | -4354 | 1.47E-04 | 2300 | 0.333333 | 3.441102 | 2204842 | SOX9    |
| 5484.732 | -4354 | 1.47E-04 | 2094 | 0.333333 | 3.441102 | 2241016 | IL24    |
| 4918.165 | -4354 | 1.47E-04 | 2414 | 0.333333 | 3.440873 | 2169102 | COL4A1  |
| 5625.209 | -4354 | 1.47E-04 | 2168 | 0.333333 | 3.440873 | 2269508 | TP53BP2 |
| 5568.783 | -4354 | 1.47E-04 | 2251 | 0.333333 | 3.440643 | 2258244 | KAT2B   |
| 5463.478 | -4354 | 1.47E-04 | 2146 | 0.333333 | 3.440643 | 2161530 | PRKACG  |
| 5144.389 | -4354 | 1.47E-04 | 2359 | 0.333333 | 3.440184 | 2235732 | SLC7A11 |
| 5314.248 | -4354 | 1.47E-04 | 2291 | 0.333333 | 3.440184 | 2207588 | IRF8    |
| 5504.475 | -4354 | 1.47E-04 | 2208 | 0.333333 | 3.439954 | 2221990 | CCR9    |
| 4883.522 | -4354 | 1.47E-04 | 1990 | 0.333333 | 3.439954 | 2176472 | P2RX1   |
| 6618.546 | -4354 | 1.47E-04 | 1981 | 0.333333 | 3.439954 | 2432944 | CLDN7   |
| 5287.536 | -4354 | 1.47E-04 | 2067 | 0.333333 | 3.439724 | 2225118 | TNNC1   |
| 4765.442 | -4354 | 1.47E-04 | 2111 | 0.333333 | 3.439495 | 2104936 | ADGRE5  |
| 4829.218 | -4354 | 1.47E-04 | 2025 | 0.333333 | 3.439265 | 2171988 | AEBP1   |
| 5847.234 | -4354 | 1.47E-04 | 2206 | 0.333333 | 3.439036 | 2263238 | TEC     |
| 5010.17  | -4354 | 1.47E-04 | 2154 | 0.333333 | 3.439036 | 2129004 | CASQ2   |
| 5155.915 | -4354 | 1.47E-04 | 1969 | 0.333333 | 3.439036 | 2183372 | HK3     |
| 5603.252 | -4354 | 1.47E-04 | 2419 | 0.333333 | 3.438806 | 2249282 | MAPK7   |
| 5555.369 | -4354 | 1.47E-04 | 2288 | 0.333333 | 3.438806 | 2252054 | CAMK4   |
| 5437.451 | -4354 | 1.47E-04 | 2205 | 0.333333 | 3.438576 | 2247350 | PF4     |
| 5362.09  | -4354 | 1.47E-04 | 2078 | 0.333333 | 3.438576 | 2174554 | DUSP9   |
| 5388.024 | -4354 | 1.47E-04 | 2074 | 0.333333 | 3.438576 | 2121840 | GDF5    |
| 5060.561 | -4354 | 1.47E-04 | 2013 | 0.333333 | 3.438576 | 2183706 | CLCF1   |
| 6155.685 | -4354 | 1.47E-04 | 1951 | 0.333333 | 3.438576 | 2502654 | PLA2G3  |
| 5659.249 | -4354 | 1.47E-04 | 2446 | 0.333333 | 3.438347 | 2252354 | CNTNAP2 |
| 6074.209 | -4354 | 1.47E-04 | 2266 | 0.333333 | 3.438347 | 2319674 | CALM1   |
| 4960.165 | -4354 | 1.47E-04 | 2051 | 0.333333 | 3.438347 | 2171282 | P2RX4   |
| 5433.241 | -4354 | 1.47E-04 | 2030 | 0.333333 | 3.438347 | 2232880 | GIT1    |
| 5048.727 | -4354 | 1.47E-04 | 2036 | 0.333333 | 3.438117 | 2131184 | CTSL    |
| 5229.862 | -4354 | 1.47E-04 | 2006 | 0.333333 | 3.438117 | 2145086 | IFNA7   |
| 5421.061 | -4354 | 1.47E-04 | 2192 | 0.333333 | 3.437887 | 2192984 | PCK1    |
| 5866.64  | -4354 | 1.47E-04 | 2140 | 0.333333 | 3.437887 | 2292804 | DGKD    |
| 4890.975 | -4354 | 1.47E-04 | 2115 | 0.333333 | 3.437887 | 2164524 | ASAP2   |
| 4429.366 | -4354 | 1.47E-04 | 2024 | 0.333333 | 3.437887 | 2077890 | DRAM1   |
| 5329.344 | -4354 | 1.47E-04 | 2081 | 0.333333 | 3.437658 | 2164084 | ADH7    |
| 4908.811 | -4354 | 1.47E-04 | 2122 | 0.333333 | 3.437428 | 2112662 | SGK1    |
| 5959.283 | -4354 | 1.47E-04 | 2073 | 0.333333 | 3.437428 | 2218992 | CLDN17  |
| 5487.601 | -4354 | 1.47E-04 | 2630 | 0.333333 | 3.437199 | 2197988 | FN1     |

|          |       |          |      |          |          |         |          |
|----------|-------|----------|------|----------|----------|---------|----------|
| 4526.738 | -4354 | 1.47E-04 | 2195 | 0.333333 | 3.437199 | 2088606 | BDKRB2   |
| 5597.458 | -4354 | 1.47E-04 | 2163 | 0.333333 | 3.437199 | 2222490 | CXCL6    |
| 5257.716 | -4354 | 1.47E-04 | 2153 | 0.333333 | 3.437199 | 2175282 | PLA2G4A  |
| 5094.143 | -4354 | 1.47E-04 | 2117 | 0.333333 | 3.437199 | 2150362 | GRM6     |
| 5093.47  | -4354 | 1.47E-04 | 2064 | 0.333333 | 3.437199 | 2175048 | IGFBP2   |
| 6165.984 | -4354 | 1.47E-04 | 1985 | 0.333333 | 3.437199 | 2242834 | PGAM1    |
| 6086.137 | -4354 | 1.47E-04 | 2335 | 0.333333 | 3.436969 | 2297098 | GOT2     |
| 5148.57  | -4354 | 1.47E-04 | 2276 | 0.333333 | 3.436969 | 2195282 | ITGA6    |
| 5457.929 | -4354 | 1.47E-04 | 2220 | 0.333333 | 3.436969 | 2186482 | VAV1     |
| 4798.445 | -4354 | 1.47E-04 | 2148 | 0.333333 | 3.436969 | 2082012 | F2       |
| 5374.616 | -4354 | 1.47E-04 | 2360 | 0.333333 | 3.43651  | 2198744 | MEIS1    |
| 5147.968 | -4354 | 1.47E-04 | 2329 | 0.333333 | 3.43651  | 2148146 | MAP3K5   |
| 4810.68  | -4354 | 1.47E-04 | 2093 | 0.333333 | 3.43651  | 2121966 | CD80     |
| 4623.381 | -4354 | 1.47E-04 | 1992 | 0.333333 | 3.43628  | 2081048 | SEMA7A   |
| 5669.679 | -4354 | 1.47E-04 | 2245 | 0.333333 | 3.436051 | 2142148 | GC       |
| 4491.852 | -4354 | 1.47E-04 | 2101 | 0.333333 | 3.436051 | 2072196 | THBS2    |
| 4918.482 | -4354 | 1.47E-04 | 2311 | 0.333333 | 3.435821 | 2171262 | FLNB     |
| 4934.369 | -4354 | 1.47E-04 | 2092 | 0.333333 | 3.435591 | 2138198 | AQP9     |
| 5195.291 | -4354 | 1.47E-04 | 2085 | 0.333333 | 3.435591 | 2125614 | SLC10A2  |
| 5341.241 | -4354 | 1.47E-04 | 2437 | 0.333333 | 3.435362 | 2166150 | CXCR4    |
| 4525.255 | -4354 | 1.47E-04 | 2133 | 0.333333 | 3.435362 | 2068516 | PLAT     |
| 5556.394 | -4354 | 1.47E-04 | 2121 | 0.333333 | 3.435362 | 2182408 | GNB2     |
| 5627.781 | -4354 | 1.47E-04 | 1976 | 0.333333 | 3.435362 | 2163382 | CA14     |
| 4992.957 | -4354 | 1.47E-04 | 2147 | 0.333333 | 3.435132 | 2139264 | AOAH     |
| 5667.617 | -4354 | 1.47E-04 | 2088 | 0.333333 | 3.434902 | 2221072 | CCL20    |
| 5613.298 | -4354 | 1.47E-04 | 2057 | 0.333333 | 3.434902 | 2147978 | NAT2     |
| 5262.94  | -4354 | 1.47E-04 | 1993 | 0.333333 | 3.434902 | 2203590 | SLC1A5   |
| 4984.143 | -4354 | 1.47E-04 | 2440 | 0.333333 | 3.434673 | 2114366 | TGFBR2   |
| 5502.974 | -4354 | 1.47E-04 | 2325 | 0.333333 | 3.434673 | 2214328 | IL12A    |
| 5724.493 | -4354 | 1.47E-04 | 2261 | 0.333333 | 3.434673 | 2196274 | ATP6V1E1 |
| 5316.276 | -4354 | 1.47E-04 | 2223 | 0.333333 | 3.434673 | 2113786 | LHCGR    |
| 5131.389 | -4354 | 1.47E-04 | 2052 | 0.333333 | 3.434673 | 2149730 | HSD11B2  |
| 5218.974 | -4354 | 1.47E-04 | 2122 | 0.333333 | 3.434214 | 2110432 | AADAC    |
| 4846.707 | -4354 | 1.47E-04 | 2377 | 0.333333 | 3.433984 | 2145492 | ITGA2    |
| 4916.781 | -4354 | 1.47E-04 | 2086 | 0.333333 | 3.433984 | 2093058 | NPY      |
| 5034.871 | -4354 | 1.47E-04 | 2001 | 0.333333 | 3.433984 | 2141072 | ICAM3    |
| 5078.483 | -4354 | 1.47E-04 | 2126 | 0.333333 | 3.433754 | 2069920 | NTF3     |
| 4718.669 | -4354 | 1.47E-04 | 2073 | 0.333333 | 3.433754 | 2073190 | LGALS1   |
| 5023.946 | -4354 | 1.47E-04 | 1982 | 0.333333 | 3.433754 | 2106944 | TRPV4    |
| 6175.95  | -4354 | 1.47E-04 | 2325 | 0.333333 | 3.433525 | 2257230 | EHHADH   |
| 6335.349 | -4354 | 1.47E-04 | 2324 | 0.333333 | 3.433525 | 2296560 | PDPK1    |

|          |       |          |      |          |          |         |          |
|----------|-------|----------|------|----------|----------|---------|----------|
| 5826.533 | -4354 | 1.47E-04 | 2207 | 0.333333 | 3.433295 | 2215840 | PPP2R1A  |
| 4631.524 | -4354 | 1.47E-04 | 2186 | 0.333333 | 3.433295 | 2074716 | LAPTM5   |
| 5539.192 | -4354 | 1.47E-04 | 2056 | 0.333333 | 3.433295 | 2212448 | ATG9A    |
| 4553.434 | -4354 | 1.47E-04 | 2210 | 0.333333 | 3.433065 | 2052140 | ANXA1    |
| 5201.098 | -4354 | 1.47E-04 | 1989 | 0.333333 | 3.433065 | 2190342 | DHCR24   |
| 5527.168 | -4354 | 1.47E-04 | 1944 | 0.333333 | 3.433065 | 2195588 | ORAI3    |
| 5105.402 | -4354 | 1.47E-04 | 2323 | 0.333333 | 3.432836 | 2117898 | BCL6     |
| 4941.417 | -4354 | 1.47E-04 | 2035 | 0.333333 | 3.432836 | 2103398 | HK1      |
| 5039.622 | -4354 | 1.47E-04 | 2033 | 0.333333 | 3.432836 | 2037018 | CFHR2    |
| 4591.426 | -4354 | 1.47E-04 | 1966 | 0.333333 | 3.432836 | 2050634 | CHAD     |
| 4855.756 | -4354 | 1.47E-04 | 1947 | 0.333333 | 3.432606 | 2106930 | IL32     |
| 5770.193 | -4354 | 1.47E-04 | 2916 | 0.333333 | 3.432377 | 2197342 | CTNNB1   |
| 5251.593 | -4354 | 1.47E-04 | 2393 | 0.333333 | 3.432377 | 2155470 | BMPR1B   |
| 5243.64  | -4354 | 1.47E-04 | 2316 | 0.333333 | 3.432377 | 2144456 | CACNA2D3 |
| 4916.3   | -4354 | 1.47E-04 | 2054 | 0.333333 | 3.432377 | 2083960 | CD1B     |
| 4740.19  | -4354 | 1.47E-04 | 2172 | 0.333333 | 3.432147 | 2077136 | IL10RA   |
| 4745.945 | -4354 | 1.47E-04 | 2299 | 0.333333 | 3.431917 | 2052504 | VIM      |
| 4608.978 | -4354 | 1.47E-04 | 1944 | 0.333333 | 3.431917 | 2083646 | SPHK1    |
| 5216.33  | -4354 | 1.47E-04 | 1982 | 0.333333 | 3.431688 | 2114138 | GABARAP  |
| 5091.404 | -4354 | 1.46E-04 | 1993 | 0.333333 | 3.431458 | 2073384 | TBXT     |
| 4345.375 | -4354 | 1.46E-04 | 1943 | 0.333333 | 3.431458 | 2022146 | ACKR1    |
| 4714.006 | -4354 | 1.46E-04 | 1926 | 0.333333 | 3.431458 | 2009892 | IL36A    |
| 4145.59  | -4354 | 1.46E-04 | 2174 | 0.333333 | 3.431228 | 1984784 | MMP2     |
| 5244.128 | -4354 | 1.46E-04 | 2060 | 0.333333 | 3.430999 | 2117702 | ALDH3A1  |
| 4794.139 | -4354 | 1.46E-04 | 2040 | 0.333333 | 3.430999 | 2112216 | MLC1     |
| 5678.406 | -4354 | 1.46E-04 | 2027 | 0.333333 | 3.430999 | 2089816 | GRN      |
| 4987.923 | -4354 | 1.46E-04 | 1990 | 0.333333 | 3.430999 | 2062490 | SEMA6C   |
| 5717.883 | -4354 | 1.46E-04 | 2338 | 0.333333 | 3.430769 | 2188306 | TIAM1    |
| 5607.253 | -4354 | 1.46E-04 | 2298 | 0.333333 | 3.430769 | 2176224 | MAML3    |
| 4933.594 | -4354 | 1.46E-04 | 2070 | 0.333333 | 3.430769 | 2067514 | ACSL1    |
| 4891.324 | -4354 | 1.46E-04 | 2069 | 0.333333 | 3.430769 | 2115694 | PYGM     |
| 4811.717 | -4354 | 1.46E-04 | 2016 | 0.333333 | 3.430769 | 2097926 | GADD45A  |
| 5331.003 | -4354 | 1.46E-04 | 2116 | 0.333333 | 3.43054  | 2139674 | PGM1     |
| 4664.342 | -4354 | 1.46E-04 | 1991 | 0.333333 | 3.43054  | 2069758 | EBI3     |
| 5061.048 | -4354 | 1.46E-04 | 1951 | 0.333333 | 3.43054  | 2113046 | LYL1     |
| 4589.303 | -4354 | 1.46E-04 | 1919 | 0.333333 | 3.43054  | 2016658 | CRLF2    |
| 5023.543 | -4354 | 1.46E-04 | 2184 | 0.333333 | 3.43031  | 2089030 | FOLH1    |
| 5424.87  | -4354 | 1.46E-04 | 2145 | 0.333333 | 3.43031  | 2137184 | ARPC1A   |
| 6869.147 | -4354 | 1.46E-04 | 2138 | 0.333333 | 3.43031  | 2323676 | UBA52    |
| 4942.896 | -4354 | 1.46E-04 | 2088 | 0.333333 | 3.43031  | 2077064 | CTSD     |
| 5603.654 | -4354 | 1.46E-04 | 2465 | 0.333333 | 3.43008  | 2160378 | MAGI2    |

|          |       |          |      |          |          |         |         |
|----------|-------|----------|------|----------|----------|---------|---------|
| 5358.053 | -4354 | 1.46E-04 | 2090 | 0.333333 | 3.43008  | 2104128 | PCBP1   |
| 4933.374 | -4354 | 1.46E-04 | 2036 | 0.333333 | 3.43008  | 2126260 | IRF6    |
| 4400.251 | -4354 | 1.46E-04 | 2022 | 0.333333 | 3.429851 | 2012548 | COL4A4  |
| 5021.89  | -4354 | 1.46E-04 | 2081 | 0.333333 | 3.429621 | 2106430 | EDEM1   |
| 4872.249 | -4354 | 1.46E-04 | 2043 | 0.333333 | 3.429621 | 2058828 | CTSA    |
| 5583.503 | -4354 | 1.46E-04 | 2014 | 0.333333 | 3.429621 | 2159750 | PKMYT1  |
| 4391.65  | -4354 | 1.46E-04 | 1963 | 0.333333 | 3.429621 | 2038126 | IL3RA   |
| 5061.712 | -4354 | 1.46E-04 | 2327 | 0.333333 | 3.429392 | 2114042 | YWHAH   |
| 5073.056 | -4354 | 1.46E-04 | 2043 | 0.333333 | 3.429392 | 2060050 | LGMN    |
| 4928.404 | -4354 | 1.46E-04 | 1979 | 0.333333 | 3.429392 | 2103508 | BATF    |
| 5035.598 | -4354 | 1.46E-04 | 2060 | 0.333333 | 3.429162 | 2070668 | TSPO    |
| 5109.72  | -4354 | 1.46E-04 | 1965 | 0.333333 | 3.429162 | 2089556 | PYCARD  |
| 4820.046 | -4354 | 1.46E-04 | 1948 | 0.333333 | 3.429162 | 2061980 | SHC2    |
| 4359.378 | -4354 | 1.46E-04 | 1948 | 0.333333 | 3.429162 | 2013760 | TNFSF13 |
| 6095.231 | -4354 | 1.46E-04 | 2030 | 0.333333 | 3.428932 | 2225202 | EPHX2   |
| 4558.364 | -4354 | 1.46E-04 | 1991 | 0.333333 | 3.428932 | 2030444 | GPX2    |
| 5181.914 | -4354 | 1.46E-04 | 1894 | 0.333333 | 3.428932 | 2163966 | FAM117A |
| 5177.405 | -4354 | 1.46E-04 | 2186 | 0.333333 | 3.428703 | 2116206 | ATP1A1  |
| 5090.806 | -4354 | 1.46E-04 | 2017 | 0.333333 | 3.428703 | 2099732 | EPHX1   |
| 4599.725 | -4354 | 1.46E-04 | 2103 | 0.333333 | 3.428243 | 2006758 | C6      |
| 5461.865 | -4354 | 1.46E-04 | 2088 | 0.333333 | 3.428243 | 2178722 | GOT1    |
| 4981.008 | -4354 | 1.46E-04 | 2287 | 0.333333 | 3.428014 | 2139782 | RAPGEF1 |
| 5085.572 | -4354 | 1.46E-04 | 2124 | 0.333333 | 3.428014 | 2091096 | EGF     |
| 4868.719 | -4354 | 1.46E-04 | 2035 | 0.333333 | 3.428014 | 2081750 | ID3     |
| 5253.803 | -4354 | 1.46E-04 | 2482 | 0.333333 | 3.427784 | 2123480 | CXCL12  |
| 4664.763 | -4354 | 1.46E-04 | 2232 | 0.333333 | 3.427784 | 2040868 | SPARC   |
| 4842.274 | -4354 | 1.46E-04 | 2143 | 0.333333 | 3.427784 | 2025036 | IL21    |
| 5589.017 | -4354 | 1.46E-04 | 2105 | 0.333333 | 3.427784 | 2165048 | LDHB    |
| 4687.468 | -4354 | 1.46E-04 | 2062 | 0.333333 | 3.427784 | 2016872 | LEP     |
| 4558.111 | -4354 | 1.46E-04 | 1907 | 0.333333 | 3.427784 | 1974068 | CA7     |
| 4629.238 | -4354 | 1.46E-04 | 2307 | 0.333333 | 3.427555 | 2035438 | EDNRB   |
| 4816.815 | -4354 | 1.46E-04 | 2187 | 0.333333 | 3.427555 | 2039488 | CCR4    |
| 5232.046 | -4354 | 1.46E-04 | 2151 | 0.333333 | 3.427555 | 2118482 | BLNK    |
| 5893.669 | -4354 | 1.46E-04 | 2051 | 0.333333 | 3.427555 | 2176086 | CACNG1  |
| 4910.904 | -4354 | 1.46E-04 | 2024 | 0.333333 | 3.427555 | 2088132 | CEBPE   |
| 5025.387 | -4354 | 1.46E-04 | 2047 | 0.333333 | 3.427325 | 2084582 | NEU1    |
| 4950.135 | -4354 | 1.46E-04 | 2357 | 0.333333 | 3.427095 | 2124522 | CDH1    |
| 5034.621 | -4354 | 1.46E-04 | 2191 | 0.333333 | 3.427095 | 2104784 | KCNN2   |
| 4713.617 | -4354 | 1.46E-04 | 2075 | 0.333333 | 3.427095 | 2028810 | IL33    |
| 5123.764 | -4354 | 1.46E-04 | 2653 | 0.333333 | 3.426866 | 2102688 | JUN     |
| 4883.872 | -4354 | 1.46E-04 | 2416 | 0.333333 | 3.426636 | 2055784 | NTRK2   |

|          |       |          |      |          |          |         |          |
|----------|-------|----------|------|----------|----------|---------|----------|
| 5299.211 | -4354 | 1.46E-04 | 2059 | 0.333333 | 3.426636 | 2169600 | DDIT3    |
| 4486.136 | -4354 | 1.46E-04 | 1972 | 0.333333 | 3.426636 | 2002236 | CETP     |
| 5879.985 | -4354 | 1.46E-04 | 2201 | 0.333333 | 3.426406 | 2143704 | GSK3A    |
| 5293.57  | -4354 | 1.46E-04 | 1916 | 0.333333 | 3.426406 | 2151772 | PIP4K2C  |
| 5010.629 | -4354 | 1.46E-04 | 2249 | 0.333333 | 3.426177 | 2031024 | RAP1B    |
| 5235.704 | -4354 | 1.46E-04 | 2129 | 0.333333 | 3.426177 | 2121458 | RASGRP1  |
| 4610.464 | -4354 | 1.46E-04 | 2072 | 0.333333 | 3.426177 | 1987120 | CYP11A1  |
| 4432.157 | -4354 | 1.46E-04 | 1887 | 0.333333 | 3.426177 | 1935166 | FEV      |
| 5311.674 | -4354 | 1.46E-04 | 2232 | 0.333333 | 3.425947 | 2069414 | MBL2     |
| 4821.86  | -4354 | 1.46E-04 | 2132 | 0.333333 | 3.425947 | 2012960 | CPB2     |
| 4930.685 | -4354 | 1.46E-04 | 1985 | 0.333333 | 3.425947 | 2034542 | CTF1     |
| 5013.495 | -4354 | 1.46E-04 | 1918 | 0.333333 | 3.425947 | 2038580 | PDCD1    |
| 5376.703 | -4354 | 1.46E-04 | 2407 | 0.333333 | 3.425718 | 2105568 | PLCB4    |
| 6673.391 | -4354 | 1.46E-04 | 2316 | 0.333333 | 3.425718 | 2376196 | TEAD1    |
| 4719.657 | -4354 | 1.46E-04 | 2244 | 0.333333 | 3.425718 | 2063454 | GNA12    |
| 5367.165 | -4354 | 1.46E-04 | 2216 | 0.333333 | 3.425718 | 2040142 | F9       |
| 5642.27  | -4354 | 1.46E-04 | 1983 | 0.333333 | 3.425718 | 2157558 | PCK2     |
| 5379.38  | -4354 | 1.46E-04 | 2463 | 0.333333 | 3.425488 | 2142412 | FBXW7    |
| 5479.879 | -4354 | 1.46E-04 | 2084 | 0.333333 | 3.425488 | 2142122 | PIK3C2B  |
| 4571.549 | -4354 | 1.46E-04 | 2074 | 0.333333 | 3.425488 | 2015112 | PTGER2   |
| 5107.366 | -4354 | 1.46E-04 | 2028 | 0.333333 | 3.425488 | 2033728 | HHEX     |
| 4626.216 | -4354 | 1.46E-04 | 1899 | 0.333333 | 3.425488 | 2053830 | TLR5     |
| 4974.558 | -4354 | 1.46E-04 | 2139 | 0.333333 | 3.425258 | 2058962 | ICAM2    |
| 5340.044 | -4354 | 1.46E-04 | 2086 | 0.333333 | 3.425258 | 2092828 | POMC     |
| 4982.191 | -4354 | 1.46E-04 | 1992 | 0.333333 | 3.425258 | 2036336 | KCNF1    |
| 4968.987 | -4354 | 1.46E-04 | 1940 | 0.333333 | 3.425258 | 2038310 | IFNA17   |
| 4562.002 | -4354 | 1.46E-04 | 1906 | 0.333333 | 3.425258 | 2046802 | EFNA1    |
| 5667.035 | -4354 | 1.46E-04 | 2101 | 0.333333 | 3.425029 | 2135056 | TFAP4    |
| 4764.122 | -4354 | 1.46E-04 | 2037 | 0.333333 | 3.425029 | 2001116 | TSHB     |
| 5157.137 | -4354 | 1.46E-04 | 1883 | 0.333333 | 3.425029 | 2057340 | CLDN9    |
| 4811.901 | -4354 | 1.46E-04 | 2213 | 0.333333 | 3.424799 | 2018394 | GPC3     |
| 5332.695 | -4354 | 1.46E-04 | 2193 | 0.333333 | 3.424799 | 2098450 | MAPKAPK3 |
| 4933.814 | -4354 | 1.46E-04 | 1944 | 0.333333 | 3.424799 | 2073480 | ACSL5    |
| 4899.879 | -4354 | 1.46E-04 | 1994 | 0.333333 | 3.424569 | 2031156 | SIPA1    |
| 5210.508 | -4354 | 1.46E-04 | 1961 | 0.333333 | 3.424569 | 2062742 | SLC27A3  |
| 4785.142 | -4354 | 1.46E-04 | 1961 | 0.333333 | 3.424569 | 2009458 | TYROBP   |
| 5027.677 | -4354 | 1.46E-04 | 2349 | 0.333333 | 3.42434  | 2058622 | TCF7L2   |
| 4684.111 | -4354 | 1.46E-04 | 2092 | 0.333333 | 3.42434  | 2060566 | ZBTB16   |
| 6026.194 | -4354 | 1.46E-04 | 1983 | 0.333333 | 3.42434  | 2148470 | PARD6A   |
| 5161.429 | -4354 | 1.46E-04 | 1947 | 0.333333 | 3.42434  | 2039850 | CHI3L2   |
| 4555.167 | -4354 | 1.46E-04 | 2179 | 0.333333 | 3.42411  | 2024826 | ABCB1    |

|          |       |          |      |          |          |         |           |
|----------|-------|----------|------|----------|----------|---------|-----------|
| 5449.894 | -4354 | 1.46E-04 | 2419 | 0.333333 | 3.423881 | 2072514 | AKT1      |
| 5157.597 | -4354 | 1.46E-04 | 2068 | 0.333333 | 3.423881 | 2012162 | PDE6A     |
| 5475.55  | -4354 | 1.46E-04 | 2048 | 0.333333 | 3.423881 | 2047130 | TLX1      |
| 4952.255 | -4354 | 1.46E-04 | 1912 | 0.333333 | 3.423881 | 2028174 | TCIRG1    |
| 6051.604 | -4354 | 1.46E-04 | 2146 | 0.333333 | 3.423651 | 2193156 | BCL9      |
| 4341.325 | -4354 | 1.46E-04 | 1970 | 0.333333 | 3.423651 | 1981904 | NPR1      |
| 4734.807 | -4354 | 1.46E-04 | 2245 | 0.333333 | 3.423421 | 2057452 | ITPKB     |
| 5136.458 | -4354 | 1.46E-04 | 2241 | 0.333333 | 3.423421 | 2049696 | BTK       |
| 4975.054 | -4354 | 1.46E-04 | 1967 | 0.333333 | 3.423421 | 2081476 | CACNA2D2  |
| 6016.178 | -4354 | 1.46E-04 | 1955 | 0.333333 | 3.423421 | 2144288 | RGL2      |
| 4737.703 | -4354 | 1.46E-04 | 1930 | 0.333333 | 3.423421 | 1966730 | MYL7      |
| 4780.348 | -4354 | 1.46E-04 | 2237 | 0.333333 | 3.423192 | 2036998 | PGD       |
| 4544.721 | -4354 | 1.46E-04 | 2023 | 0.333333 | 3.423192 | 2009510 | ID1       |
| 4947.523 | -4354 | 1.46E-04 | 1954 | 0.333333 | 3.423192 | 2018226 | CORO1A    |
| 4851.321 | -4354 | 1.46E-04 | 1897 | 0.333333 | 3.423192 | 2055770 | TNFRSF12A |
| 4408.436 | -4354 | 1.46E-04 | 1999 | 0.333333 | 3.422962 | 2000466 | SERPINB2  |
| 4717.872 | -4354 | 1.46E-04 | 2074 | 0.333333 | 3.422732 | 1995594 | MNDA      |
| 4737.122 | -4354 | 1.46E-04 | 2008 | 0.333333 | 3.422732 | 1995348 | FGG       |
| 4867.025 | -4354 | 1.46E-04 | 2000 | 0.333333 | 3.422732 | 2038076 | NOS2      |
| 5397.254 | -4354 | 1.46E-04 | 1964 | 0.333333 | 3.422732 | 2069386 | TUBB4A    |
| 4518.539 | -4354 | 1.46E-04 | 1998 | 0.333333 | 3.422503 | 2007548 | GABARAPL1 |
| 4673.708 | -4354 | 1.46E-04 | 1972 | 0.333333 | 3.422503 | 2006992 | SNAI1     |
| 5662.71  | -4354 | 1.46E-04 | 2324 | 0.333333 | 3.422273 | 2099978 | PRKN      |
| 4574.885 | -4354 | 1.46E-04 | 2218 | 0.333333 | 3.422273 | 2001754 | SEMA3A    |
| 5014.179 | -4354 | 1.46E-04 | 2006 | 0.333333 | 3.422273 | 2074706 | PC        |
| 5153.196 | -4354 | 1.46E-04 | 1955 | 0.333333 | 3.422273 | 2050736 | CYP4F3    |
| 4866.131 | -4354 | 1.46E-04 | 2158 | 0.333333 | 3.421814 | 2014886 | SELL      |
| 4825.597 | -4354 | 1.46E-04 | 1989 | 0.333333 | 3.421814 | 1990212 | SLC22A1   |
| 4395.903 | -4354 | 1.46E-04 | 1946 | 0.333333 | 3.421814 | 1961358 | LIF       |
| 8056.364 | -4354 | 1.46E-04 | 1926 | 0.333333 | 3.421814 | 2298740 | MT-ND4    |
| 4633.483 | -4354 | 1.46E-04 | 1886 | 0.333333 | 3.421814 | 2014584 | KRT16     |
| 4995.129 | -4354 | 1.46E-04 | 2424 | 0.333333 | 3.421584 | 2077394 | CBL       |
| 5291.147 | -4354 | 1.46E-04 | 2189 | 0.333333 | 3.421584 | 2076750 | STAM      |
| 4597.115 | -4354 | 1.46E-04 | 2006 | 0.333333 | 3.421584 | 1922556 | FGF23     |
| 5018.248 | -4354 | 1.46E-04 | 1961 | 0.333333 | 3.421584 | 2053284 | RAB3A     |
| 4291.812 | -4354 | 1.46E-04 | 1944 | 0.333333 | 3.421584 | 1972892 | ABLIM3    |
| 4713.583 | -4354 | 1.46E-04 | 2289 | 0.333333 | 3.421355 | 1981522 | GRIN2A    |
| 5020.437 | -4354 | 1.46E-04 | 2244 | 0.333333 | 3.421355 | 2075526 | CREB5     |
| 4268.252 | -4354 | 1.46E-04 | 2046 | 0.333333 | 3.421355 | 1930970 | GNG4      |
| 4892.478 | -4354 | 1.46E-04 | 2037 | 0.333333 | 3.421125 | 2050344 | CYP2J2    |
| 4503.645 | -4354 | 1.46E-04 | 2037 | 0.333333 | 3.421125 | 1974464 | GDF7      |



|          |       |          |      |          |          |         |          |
|----------|-------|----------|------|----------|----------|---------|----------|
| 4322.186 | -4354 | 1.46E-04 | 1952 | 0.333333 | 3.421125 | 1913470 | F7       |
| 6389.039 | -4354 | 1.46E-04 | 2604 | 0.333333 | 3.420896 | 2169142 | MAPK14   |
| 4556.903 | -4354 | 1.46E-04 | 2028 | 0.333333 | 3.420896 | 1918362 | ADH1A    |
| 5226.02  | -4354 | 1.46E-04 | 1944 | 0.333333 | 3.420896 | 2069364 | AP1M2    |
| 4529.795 | -4354 | 1.45E-04 | 2006 | 0.333333 | 3.420666 | 1990398 | OSR2     |
| 4862.696 | -4354 | 1.45E-04 | 2083 | 0.333333 | 3.420436 | 1983438 | HRH2     |
| 4941.137 | -4354 | 1.45E-04 | 1939 | 0.333333 | 3.419977 | 1976916 | MOS      |
| 4724.117 | -4354 | 1.45E-04 | 1897 | 0.333333 | 3.419977 | 2024416 | TEAD3    |
| 4482.355 | -4354 | 1.45E-04 | 2323 | 0.333333 | 3.419747 | 1972786 | LAMC1    |
| 4573.563 | -4354 | 1.45E-04 | 2089 | 0.333333 | 3.419747 | 1940368 | FCER1G   |
| 5437     | -4354 | 1.45E-04 | 2152 | 0.333333 | 3.419518 | 2069268 | PARP1    |
| 4609.981 | -4354 | 1.45E-04 | 2090 | 0.333333 | 3.419518 | 2000352 | CD226    |
| 4144.264 | -4354 | 1.45E-04 | 1959 | 0.333333 | 3.419518 | 1902120 | GDF10    |
| 4883.419 | -4354 | 1.45E-04 | 2268 | 0.333333 | 3.419288 | 2022780 | VEGFA    |
| 4986.337 | -4354 | 1.45E-04 | 2231 | 0.333333 | 3.419059 | 2047828 | CSNK1E   |
| 4937.547 | -4354 | 1.45E-04 | 2185 | 0.333333 | 3.419059 | 1985130 | CDH12    |
| 5284.025 | -4354 | 1.45E-04 | 1960 | 0.333333 | 3.419059 | 2024614 | GPI      |
| 4976.235 | -4354 | 1.45E-04 | 1870 | 0.333333 | 3.419059 | 2040186 | FRAT2    |
| 5355.983 | -4354 | 1.45E-04 | 2107 | 0.333333 | 3.418829 | 2027762 | CCL19    |
| 5461.771 | -4354 | 1.45E-04 | 2105 | 0.333333 | 3.418829 | 2025048 | CYP7A1   |
| 4331.025 | -4354 | 1.45E-04 | 2095 | 0.333333 | 3.418829 | 1906474 | TLR2     |
| 5110.64  | -4354 | 1.45E-04 | 2038 | 0.333333 | 3.418829 | 1960210 | ONECUT1  |
| 4091.717 | -4354 | 1.45E-04 | 1878 | 0.333333 | 3.418829 | 1906368 | PLTP     |
| 4580.813 | -4354 | 1.45E-04 | 2335 | 0.333333 | 3.418599 | 1952432 | ZEB2     |
| 4979.518 | -4354 | 1.45E-04 | 2059 | 0.333333 | 3.418599 | 2039594 | GRAP2    |
| 4272.051 | -4354 | 1.45E-04 | 1960 | 0.333333 | 3.418599 | 1940478 | CD82     |
| 4580.561 | -4354 | 1.45E-04 | 2141 | 0.333333 | 3.41814  | 1979860 | CXCR2    |
| 4229.48  | -4354 | 1.45E-04 | 2045 | 0.333333 | 3.41814  | 1921776 | MMP9     |
| 4479.749 | -4354 | 1.45E-04 | 2003 | 0.333333 | 3.41814  | 1931262 | HLA-DRB1 |
| 5083.685 | -4354 | 1.45E-04 | 2150 | 0.333333 | 3.41791  | 2046364 | CXCL13   |
| 4809.791 | -4354 | 1.45E-04 | 1912 | 0.333333 | 3.417681 | 1961194 | WNT10B   |
| 4599.422 | -4354 | 1.45E-04 | 2014 | 0.333333 | 3.417451 | 1937900 | SERPINF2 |
| 5492.108 | -4354 | 1.45E-04 | 1976 | 0.333333 | 3.417451 | 2014796 | SLC3A2   |
| 4623.432 | -4354 | 1.45E-04 | 1957 | 0.333333 | 3.417451 | 2021526 | TRIM16   |
| 4208.915 | -4354 | 1.45E-04 | 2123 | 0.333333 | 3.417222 | 1919060 | ACTC1    |
| 4964.506 | -4354 | 1.45E-04 | 2047 | 0.333333 | 3.417222 | 2007422 | GATA1    |
| 4903.885 | -4354 | 1.45E-04 | 1951 | 0.333333 | 3.417222 | 1992800 | ATP6V0C  |
| 4151.017 | -4354 | 1.45E-04 | 2119 | 0.333333 | 3.416992 | 1890474 | BDKRB1   |
| 4869.31  | -4354 | 1.45E-04 | 2015 | 0.333333 | 3.416992 | 1962394 | CAPNS1   |
| 4346.432 | -4354 | 1.45E-04 | 1971 | 0.333333 | 3.416992 | 1886074 | FGF6     |
| 4224.954 | -4354 | 1.45E-04 | 1929 | 0.333333 | 3.416992 | 1906658 | CXCL16   |

|          |       |          |      |          |          |         |         |
|----------|-------|----------|------|----------|----------|---------|---------|
| 4304.605 | -4354 | 1.45E-04 | 1919 | 0.333333 | 3.416992 | 1934300 | OLR1    |
| 4349.803 | -4354 | 1.45E-04 | 1895 | 0.333333 | 3.416992 | 1910976 | NINJ1   |
| 4617.42  | -4354 | 1.45E-04 | 1945 | 0.333333 | 3.416762 | 1884122 | IL3     |
| 5043.495 | -4354 | 1.45E-04 | 2026 | 0.333333 | 3.416533 | 1990584 | RAG2    |
| 4942.641 | -4354 | 1.45E-04 | 1929 | 0.333333 | 3.416533 | 1978094 | CCL17   |
| 5004.517 | -4354 | 1.45E-04 | 2120 | 0.333333 | 3.416303 | 1974232 | CD9     |
| 4669.694 | -4354 | 1.45E-04 | 2103 | 0.333333 | 3.416303 | 1990224 | NEDD4   |
| 5892.588 | -4354 | 1.45E-04 | 2025 | 0.333333 | 3.416303 | 2150518 | FABP5   |
| 4930.872 | -4354 | 1.45E-04 | 2170 | 0.333333 | 3.416073 | 2020504 | C5      |
| 5508.927 | -4354 | 1.45E-04 | 2244 | 0.333333 | 3.415844 | 2026358 | PPP1CC  |
| 5294.854 | -4354 | 1.45E-04 | 2171 | 0.333333 | 3.415844 | 2029942 | SLC2A1  |
| 5131.846 | -4354 | 1.45E-04 | 2140 | 0.333333 | 3.415844 | 1943470 | SYN3    |
| 4558.872 | -4354 | 1.45E-04 | 2017 | 0.333333 | 3.415844 | 1921048 | RXRG    |
| 4755.936 | -4354 | 1.45E-04 | 1971 | 0.333333 | 3.415844 | 1968246 | CLTCL1  |
| 4368.132 | -4354 | 1.45E-04 | 1951 | 0.333333 | 3.415844 | 1926292 | PLK2    |
| 4256.828 | -4354 | 1.45E-04 | 1877 | 0.333333 | 3.415844 | 1873134 | ADH1C   |
| 4911.59  | -4354 | 1.45E-04 | 1924 | 0.333333 | 3.415614 | 2007686 | ADIPOR2 |
| 4156.456 | -4354 | 1.45E-04 | 2168 | 0.333333 | 3.415385 | 1912440 | CCN2    |
| 4562.266 | -4354 | 1.45E-04 | 2080 | 0.333333 | 3.415385 | 1930026 | RALB    |
| 4855.689 | -4354 | 1.45E-04 | 2000 | 0.333333 | 3.415385 | 1922050 | ADIPOQ  |
| 4030.472 | -4354 | 1.45E-04 | 1976 | 0.333333 | 3.415385 | 1854276 | NCF2    |
| 5078.324 | -4354 | 1.45E-04 | 2052 | 0.333333 | 3.415155 | 1971574 | VSNL1   |
| 4134.815 | -4354 | 1.45E-04 | 1961 | 0.333333 | 3.415155 | 1901790 | TREM1   |
| 4161.796 | -4354 | 1.45E-04 | 1875 | 0.333333 | 3.415155 | 1913766 | SLPI    |
| 4443.958 | -4354 | 1.45E-04 | 2074 | 0.333333 | 3.414925 | 1928096 | OXTR    |
| 5092.14  | -4354 | 1.45E-04 | 2480 | 0.333333 | 3.414696 | 1940572 | STAT3   |
| 4517.6   | -4354 | 1.45E-04 | 2101 | 0.333333 | 3.414696 | 1958264 | DAPK2   |
| 5440.263 | -4354 | 1.45E-04 | 2060 | 0.333333 | 3.414696 | 2037054 | DDB1    |
| 4723.203 | -4354 | 1.45E-04 | 1864 | 0.333333 | 3.414696 | 1956626 | CDR1    |
| 5326.956 | -4354 | 1.45E-04 | 1963 | 0.333333 | 3.414466 | 1982086 | MGAM    |
| 4889.966 | -4354 | 1.45E-04 | 1870 | 0.333333 | 3.414466 | 2009682 | ALDOC   |
| 4286.056 | -4354 | 1.45E-04 | 2077 | 0.333333 | 3.414237 | 1936140 | SDC1    |
| 5292.45  | -4354 | 1.45E-04 | 2028 | 0.333333 | 3.414237 | 1961500 | SGK2    |
| 4602.617 | -4354 | 1.45E-04 | 2179 | 0.333333 | 3.414007 | 1951774 | DNM3    |
| 5246.026 | -4354 | 1.45E-04 | 2010 | 0.333333 | 3.414007 | 2029316 | LHPP    |
| 4057.382 | -4354 | 1.45E-04 | 2035 | 0.333333 | 3.413777 | 1880232 | BASP1   |
| 4820.828 | -4354 | 1.45E-04 | 2004 | 0.333333 | 3.413777 | 1983038 | PIM2    |
| 4585.113 | -4354 | 1.45E-04 | 1985 | 0.333333 | 3.413777 | 1967046 | SH2D2A  |
| 4703.746 | -4354 | 1.45E-04 | 1872 | 0.333333 | 3.413777 | 1976794 | CYP27B1 |
| 4556.006 | -4354 | 1.45E-04 | 2202 | 0.333333 | 3.413548 | 1935442 | MAP3K3  |
| 4426.117 | -4354 | 1.45E-04 | 2091 | 0.333333 | 3.413548 | 1895642 | NPY1R   |

|          |       |          |      |          |          |         |         |
|----------|-------|----------|------|----------|----------|---------|---------|
| 4546.621 | -4354 | 1.45E-04 | 2038 | 0.333333 | 3.413548 | 1946090 | PROM1   |
| 4906.321 | -4354 | 1.45E-04 | 2027 | 0.333333 | 3.413548 | 1987512 | CXCL1   |
| 4221.31  | -4354 | 1.45E-04 | 1928 | 0.333333 | 3.413548 | 1901978 | CA4     |
| 4987.529 | -4354 | 1.45E-04 | 2305 | 0.333333 | 3.413088 | 1960934 | RDX     |
| 4620.786 | -4354 | 1.45E-04 | 2108 | 0.333333 | 3.413088 | 1886046 | DRD1    |
| 4714.816 | -4354 | 1.45E-04 | 1936 | 0.333333 | 3.413088 | 1915712 | PFKFB3  |
| 5019.972 | -4354 | 1.45E-04 | 1971 | 0.333333 | 3.412859 | 1983798 | CLDN14  |
| 4215.594 | -4354 | 1.45E-04 | 1878 | 0.333333 | 3.412859 | 1889756 | AKR1C3  |
| 4300.043 | -4354 | 1.45E-04 | 2134 | 0.333333 | 3.412629 | 1914716 | PRDM1   |
| 5620.227 | -4354 | 1.45E-04 | 2156 | 0.333333 | 3.4124   | 2013636 | CDK4    |
| 3913.496 | -4354 | 1.45E-04 | 2095 | 0.333333 | 3.4124   | 1826692 | COL4A2  |
| 3875.229 | -4354 | 1.45E-04 | 2010 | 0.333333 | 3.4124   | 1838106 | SDC2    |
| 4801.094 | -4354 | 1.45E-04 | 1814 | 0.333333 | 3.41194  | 1919080 | DSPP    |
| 4464.407 | -4354 | 1.45E-04 | 2237 | 0.333333 | 3.411711 | 1914992 | CDH2    |
| 4707.786 | -4354 | 1.45E-04 | 2049 | 0.333333 | 3.411711 | 1898110 | SAG     |
| 4671.195 | -4354 | 1.45E-04 | 1945 | 0.333333 | 3.411711 | 1891438 | MPZ     |
| 4374.474 | -4354 | 1.45E-04 | 1931 | 0.333333 | 3.411711 | 1870938 | IL15RA  |
| 4526.909 | -4354 | 1.45E-04 | 1871 | 0.333333 | 3.411481 | 1904842 | ABCD1   |
| 4192.122 | -4354 | 1.45E-04 | 1860 | 0.333333 | 3.411481 | 1811954 | PTCH2   |
| 4519.885 | -4354 | 1.45E-04 | 1972 | 0.333333 | 3.411251 | 1866656 | CCL11   |
| 5001.678 | -4354 | 1.45E-04 | 1907 | 0.333333 | 3.411251 | 1986016 | MGRN1   |
| 4120.339 | -4354 | 1.45E-04 | 1861 | 0.333333 | 3.411251 | 1806534 | SRD5A2  |
| 4380.92  | -4354 | 1.45E-04 | 1848 | 0.333333 | 3.411251 | 1875986 | ATP6AP1 |
| 4393.226 | -4354 | 1.45E-04 | 2118 | 0.333333 | 3.410792 | 1912038 | IL2RB   |
| 4914.436 | -4354 | 1.45E-04 | 2022 | 0.333333 | 3.410792 | 1987218 | WASF1   |
| 4418.508 | -4354 | 1.45E-04 | 1871 | 0.333333 | 3.410792 | 1854850 | GJD2    |
| 4096.915 | -4354 | 1.45E-04 | 2161 | 0.333333 | 3.410563 | 1851252 | GSN     |
| 4046.122 | -4354 | 1.45E-04 | 1936 | 0.333333 | 3.410563 | 1895502 | GADD45G |
| 4868.884 | -4354 | 1.45E-04 | 2013 | 0.333333 | 3.410333 | 1979354 | ELOVL4  |
| 4654.836 | -4354 | 1.45E-04 | 1998 | 0.333333 | 3.410333 | 1930878 | MAP3K14 |
| 4375.678 | -4354 | 1.45E-04 | 1996 | 0.333333 | 3.410333 | 1843526 | INHA    |
| 3979.686 | -4354 | 1.45E-04 | 1865 | 0.333333 | 3.410333 | 1826790 | PROS1   |
| 5163.68  | -4354 | 1.45E-04 | 2015 | 0.333333 | 3.410103 | 1997878 | HDAC3   |
| 3953.095 | -4354 | 1.45E-04 | 1986 | 0.333333 | 3.410103 | 1806744 | CD14    |
| 4278.517 | -4354 | 1.45E-04 | 1969 | 0.333333 | 3.410103 | 1889062 | CCNA1   |
| 4726.997 | -4354 | 1.45E-04 | 2306 | 0.333333 | 3.409874 | 1907748 | PRKG1   |
| 4311.406 | -4354 | 1.45E-04 | 1969 | 0.333333 | 3.409874 | 1883216 | IL18    |
| 3810.131 | -4354 | 1.45E-04 | 1943 | 0.333333 | 3.409874 | 1813794 | ADM     |
| 4970.084 | -4354 | 1.45E-04 | 1864 | 0.333333 | 3.409874 | 1904434 | CCL1    |
| 4398.104 | -4354 | 1.44E-04 | 2092 | 0.333333 | 3.409644 | 1908622 | CCND1   |
| 4567.002 | -4354 | 1.44E-04 | 1889 | 0.333333 | 3.409644 | 1868280 | ATP6VOB |

|          |       |          |      |          |          |         |          |
|----------|-------|----------|------|----------|----------|---------|----------|
| 4054.465 | -4354 | 1.44E-04 | 1854 | 0.333333 | 3.409644 | 1851290 | PROCR    |
| 5125.901 | -4354 | 1.44E-04 | 2140 | 0.333333 | 3.409414 | 1970864 | YWHAG    |
| 4336.572 | -4354 | 1.44E-04 | 2080 | 0.333333 | 3.409414 | 1892862 | TNF      |
| 4801.219 | -4354 | 1.44E-04 | 1981 | 0.333333 | 3.409414 | 1932350 | GY51     |
| 4356.747 | -4354 | 1.44E-04 | 1902 | 0.333333 | 3.409414 | 1832692 | SLC8A2   |
| 4016.947 | -4354 | 1.44E-04 | 1854 | 0.333333 | 3.409414 | 1802502 | TIMP2    |
| 4461.169 | -4354 | 1.44E-04 | 2005 | 0.333333 | 3.409185 | 1846136 | CACNA2D1 |
| 4199.457 | -4354 | 1.44E-04 | 1846 | 0.333333 | 3.409185 | 1862070 | DKK1     |
| 3936.774 | -4354 | 1.44E-04 | 1842 | 0.333333 | 3.409185 | 1814736 | PLA1A    |
| 4213.238 | -4354 | 1.44E-04 | 1990 | 0.333333 | 3.408955 | 1821492 | LY96     |
| 4909.768 | -4354 | 1.44E-04 | 1911 | 0.333333 | 3.408955 | 1954448 | SLC19A2  |
| 4503.801 | -4354 | 1.44E-04 | 2124 | 0.333333 | 3.408726 | 1835812 | TRHR     |
| 4217.425 | -4354 | 1.44E-04 | 1986 | 0.333333 | 3.408726 | 1873852 | BATF3    |
| 5030.941 | -4354 | 1.44E-04 | 2103 | 0.333333 | 3.408496 | 1961236 | CXCL9    |
| 5065.723 | -4354 | 1.44E-04 | 1927 | 0.333333 | 3.408496 | 1899862 | GLA      |
| 5286.397 | -4354 | 1.44E-04 | 1852 | 0.333333 | 3.408496 | 2005776 | CHD8     |
| 4064.483 | -4354 | 1.44E-04 | 1843 | 0.333333 | 3.408496 | 1817596 | CFD      |
| 4527.449 | -4354 | 1.44E-04 | 2180 | 0.333333 | 3.408266 | 1867652 | PROX1    |
| 4548.469 | -4354 | 1.44E-04 | 2204 | 0.333333 | 3.408037 | 1919148 | AFF1     |
| 4437.774 | -4354 | 1.44E-04 | 2082 | 0.333333 | 3.408037 | 1868002 | LAMB1    |
| 4459.504 | -4354 | 1.44E-04 | 1970 | 0.333333 | 3.408037 | 1868784 | AFP      |
| 4802.242 | -4354 | 1.44E-04 | 1993 | 0.333333 | 3.407807 | 1847042 | GSTA3    |
| 4551.696 | -4354 | 1.44E-04 | 2002 | 0.333333 | 3.407577 | 1897218 | SFN      |
| 4024.804 | -4354 | 1.44E-04 | 2134 | 0.333333 | 3.407348 | 1816348 | FBN1     |
| 4372.795 | -4354 | 1.44E-04 | 2007 | 0.333333 | 3.407348 | 1849144 | LIPA     |
| 4464.482 | -4354 | 1.44E-04 | 2069 | 0.333333 | 3.407118 | 1862990 | NTNG1    |
| 4084.46  | -4354 | 1.44E-04 | 1877 | 0.333333 | 3.407118 | 1819372 | ANGPTL4  |
| 3730.724 | -4354 | 1.44E-04 | 1813 | 0.333333 | 3.406889 | 1776998 | SEMA3G   |
| 4573.548 | -4354 | 1.44E-04 | 2395 | 0.333333 | 3.406659 | 1884496 | PLCB1    |
| 4630.975 | -4354 | 1.44E-04 | 2147 | 0.333333 | 3.406659 | 1900840 | RRAS2    |
| 4440.09  | -4354 | 1.44E-04 | 2020 | 0.333333 | 3.406659 | 1873654 | ARHGAP17 |
| 4615.845 | -4354 | 1.44E-04 | 1877 | 0.333333 | 3.406659 | 1883188 | AGPAT2   |
| 4168.69  | -4354 | 1.44E-04 | 1845 | 0.333333 | 3.406659 | 1819152 | IL17B    |
| 4485.712 | -4354 | 1.44E-04 | 2094 | 0.333333 | 3.406429 | 1849096 | GREM1    |
| 4220.711 | -4354 | 1.44E-04 | 2119 | 0.333333 | 3.4062   | 1852814 | ETV6     |
| 4411.794 | -4354 | 1.44E-04 | 1989 | 0.333333 | 3.4062   | 1838160 | CCK      |
| 4343.868 | -4354 | 1.44E-04 | 1980 | 0.333333 | 3.4062   | 1823852 | CAV3     |
| 4505.365 | -4354 | 1.44E-04 | 1883 | 0.333333 | 3.40597  | 1819650 | INS      |
| 3937.583 | -4354 | 1.44E-04 | 2118 | 0.333333 | 3.405741 | 1799126 | ACVRL1   |
| 4705.324 | -4354 | 1.44E-04 | 2102 | 0.333333 | 3.405741 | 1902406 | ZFHX3    |
| 4206.048 | -4354 | 1.44E-04 | 1901 | 0.333333 | 3.405741 | 1769338 | F13B     |

|          |       |          |      |          |          |         |           |
|----------|-------|----------|------|----------|----------|---------|-----------|
| 4127.767 | -4354 | 1.44E-04 | 2042 | 0.333333 | 3.405511 | 1802818 | CD55      |
| 4527.797 | -4354 | 1.44E-04 | 1878 | 0.333333 | 3.405511 | 1810244 | LHX5      |
| 4005.302 | -4354 | 1.44E-04 | 1861 | 0.333333 | 3.405511 | 1787134 | ZYX       |
| 4624.121 | -4354 | 1.44E-04 | 2260 | 0.333333 | 3.405281 | 1883222 | ATXN1     |
| 4273.667 | -4354 | 1.44E-04 | 2056 | 0.333333 | 3.405052 | 1827886 | HTR2B     |
| 5016.948 | -4354 | 1.44E-04 | 2009 | 0.333333 | 3.405052 | 1947914 | CD27      |
| 4547.092 | -4354 | 1.44E-04 | 1919 | 0.333333 | 3.405052 | 1816172 | CYP1A1    |
| 4906.71  | -4354 | 1.44E-04 | 2061 | 0.333333 | 3.404822 | 1879556 | TUBA1C    |
| 4681.192 | -4354 | 1.44E-04 | 2011 | 0.333333 | 3.404592 | 1914752 | CD38      |
| 5122.072 | -4354 | 1.44E-04 | 1893 | 0.333333 | 3.404592 | 1839886 | CYP11B2   |
| 4425.656 | -4354 | 1.44E-04 | 2173 | 0.333333 | 3.404363 | 1873528 | FRMD4A    |
| 4539.693 | -4354 | 1.44E-04 | 2155 | 0.333333 | 3.404363 | 1869102 | FLI1      |
| 4345.237 | -4354 | 1.44E-04 | 2136 | 0.333333 | 3.404363 | 1853318 | SLC1A1    |
| 4120.94  | -4354 | 1.44E-04 | 1927 | 0.333333 | 3.404363 | 1830198 | ACP5      |
| 3972.868 | -4354 | 1.44E-04 | 1905 | 0.333333 | 3.404363 | 1788352 | GOS2      |
| 4077.747 | -4354 | 1.44E-04 | 1899 | 0.333333 | 3.404363 | 1805166 | NFKBIE    |
| 4664.568 | -4354 | 1.44E-04 | 1891 | 0.333333 | 3.404363 | 1830954 | PFN1      |
| 5472.737 | -4354 | 1.44E-04 | 2375 | 0.333333 | 3.404133 | 1957370 | PSMD7     |
| 4163.81  | -4354 | 1.44E-04 | 1917 | 0.333333 | 3.404133 | 1847144 | HSPA2     |
| 4557.77  | -4354 | 1.44E-04 | 1862 | 0.333333 | 3.404133 | 1798630 | NEUROG1   |
| 4731.829 | -4354 | 1.44E-04 | 2184 | 0.333333 | 3.403904 | 1861762 | YAP1      |
| 4281.599 | -4354 | 1.44E-04 | 2058 | 0.333333 | 3.403904 | 1826306 | AMOT      |
| 4425.272 | -4354 | 1.44E-04 | 1983 | 0.333333 | 3.403674 | 1853724 | MAPK13    |
| 4267.381 | -4354 | 1.44E-04 | 1834 | 0.333333 | 3.403674 | 1844148 | WASF3     |
| 4228.76  | -4354 | 1.44E-04 | 2027 | 0.333333 | 3.403444 | 1808052 | GNG12     |
| 4685.449 | -4354 | 1.44E-04 | 1990 | 0.333333 | 3.403444 | 1879586 | TUBB2A    |
| 4251.726 | -4354 | 1.44E-04 | 1944 | 0.333333 | 3.403444 | 1819668 | VTCN1     |
| 4117.193 | -4354 | 1.44E-04 | 1900 | 0.333333 | 3.403444 | 1784376 | BMP3      |
| 5274.991 | -4354 | 1.44E-04 | 1862 | 0.333333 | 3.403444 | 1935106 | CDIPT     |
| 4297.826 | -4354 | 1.44E-04 | 2198 | 0.333333 | 3.403215 | 1800800 | SLIT2     |
| 5042.681 | -4354 | 1.44E-04 | 1949 | 0.333333 | 3.403215 | 1857150 | CCL25     |
| 4527.272 | -4354 | 1.44E-04 | 1948 | 0.333333 | 3.403215 | 1854612 | CASP7     |
| 4751.955 | -4354 | 1.44E-04 | 1899 | 0.333333 | 3.403215 | 1923150 | ATP6V0E2  |
| 4003.818 | -4354 | 1.44E-04 | 1867 | 0.333333 | 3.403215 | 1768042 | LEFTY1    |
| 4754.808 | -4354 | 1.44E-04 | 1862 | 0.333333 | 3.403215 | 1888812 | CS        |
| 4347.762 | -4354 | 1.44E-04 | 1843 | 0.333333 | 3.403215 | 1844908 | TNFRSF13B |
| 4106.44  | -4354 | 1.44E-04 | 1809 | 0.333333 | 3.403215 | 1747136 | CACNA1S   |
| 5777.402 | -4354 | 1.44E-04 | 1784 | 0.333333 | 3.403215 | 1986912 | MT-CO2    |
| 4136.939 | -4354 | 1.44E-04 | 1833 | 0.333333 | 3.402985 | 1755354 | TBX4      |
| 5279.656 | -4354 | 1.44E-04 | 1965 | 0.333333 | 3.402755 | 1935850 | DNMT1     |
| 4483.644 | -4354 | 1.44E-04 | 1805 | 0.333333 | 3.402755 | 1798754 | FRMD1     |

|          |       |          |      |          |          |         |          |
|----------|-------|----------|------|----------|----------|---------|----------|
| 4389.008 | -4354 | 1.44E-04 | 2010 | 0.333333 | 3.402526 | 1807254 | SOSTDC1  |
| 4382.798 | -4354 | 1.44E-04 | 1823 | 0.333333 | 3.402526 | 1848594 | CA11     |
| 3968.708 | -4354 | 1.44E-04 | 2004 | 0.333333 | 3.402296 | 1779214 | DGKI     |
| 4198.306 | -4354 | 1.44E-04 | 1990 | 0.333333 | 3.402296 | 1796656 | NR2F1    |
| 3993.278 | -4354 | 1.44E-04 | 1979 | 0.333333 | 3.402296 | 1800748 | ROR2     |
| 4880.529 | -4354 | 1.44E-04 | 2004 | 0.333333 | 3.402067 | 1904100 | SLC27A2  |
| 4433.876 | -4354 | 1.44E-04 | 2319 | 0.333333 | 3.401837 | 1826244 | SYK      |
| 4397.391 | -4354 | 1.44E-04 | 2125 | 0.333333 | 3.401837 | 1797356 | LMO3     |
| 4541.909 | -4354 | 1.44E-04 | 1860 | 0.333333 | 3.401837 | 1860684 | CTSV     |
| 4655.923 | -4354 | 1.44E-04 | 2150 | 0.333333 | 3.401607 | 1831602 | CTNNA3   |
| 3832.934 | -4354 | 1.44E-04 | 2016 | 0.333333 | 3.401607 | 1762196 | COL6A3   |
| 4244.406 | -4354 | 1.44E-04 | 1952 | 0.333333 | 3.401378 | 1768014 | C9       |
| 4566.394 | -4354 | 1.44E-04 | 1932 | 0.333333 | 3.401378 | 1829530 | AP3S1    |
| 4074.788 | -4354 | 1.44E-04 | 1824 | 0.333333 | 3.401378 | 1766426 | HLA-DMA  |
| 3966.414 | -4354 | 1.44E-04 | 2044 | 0.333333 | 3.401148 | 1765628 | FZD4     |
| 4347.508 | -4354 | 1.44E-04 | 2088 | 0.333333 | 3.400918 | 1794076 | ITGAV    |
| 5399.707 | -4354 | 1.44E-04 | 2011 | 0.333333 | 3.400918 | 1946642 | BPGM     |
| 3931.896 | -4354 | 1.44E-04 | 1985 | 0.333333 | 3.400918 | 1757072 | KLF4     |
| 3751.13  | -4354 | 1.44E-04 | 1952 | 0.333333 | 3.400918 | 1735800 | LMO2     |
| 4357.175 | -4354 | 1.44E-04 | 1876 | 0.333333 | 3.400918 | 1804852 | MAPK8IP1 |
| 4385.118 | -4354 | 1.44E-04 | 2060 | 0.333333 | 3.400689 | 1798824 | GYG1     |
| 3719.198 | -4354 | 1.44E-04 | 1996 | 0.333333 | 3.400689 | 1722828 | CFH      |
| 4655.023 | -4354 | 1.44E-04 | 2195 | 0.333333 | 3.400459 | 1835576 | PAK1     |
| 4456.781 | -4354 | 1.44E-04 | 2180 | 0.333333 | 3.400459 | 1827172 | FGF9     |
| 3603.967 | -4354 | 1.44E-04 | 2009 | 0.333333 | 3.400459 | 1699776 | F13A1    |
| 4217     | -4354 | 1.44E-04 | 2116 | 0.333333 | 3.40023  | 1779656 | PTHLH    |
| 4266.261 | -4354 | 1.44E-04 | 1862 | 0.333333 | 3.40023  | 1779512 | PCP4     |
| 4137.894 | -4354 | 1.44E-04 | 1806 | 0.333333 | 3.40023  | 1807676 | FCGBP    |
| 3875.743 | -4354 | 1.44E-04 | 2186 | 0.333333 | 3.4      | 1766160 | MITF     |
| 4015.794 | -4354 | 1.44E-04 | 1975 | 0.333333 | 3.4      | 1777436 | FZD7     |
| 4067.453 | -4354 | 1.44E-04 | 1902 | 0.333333 | 3.4      | 1796016 | BAMBI    |
| 4592.357 | -4354 | 1.44E-04 | 1884 | 0.333333 | 3.4      | 1823794 | ACADVL   |
| 3777.711 | -4354 | 1.44E-04 | 1809 | 0.333333 | 3.4      | 1731740 | LILRA3   |
| 3813.394 | -4354 | 1.44E-04 | 1875 | 0.333333 | 3.39977  | 1737516 | HMOX1    |
| 4060.686 | -4354 | 1.44E-04 | 1854 | 0.333333 | 3.39977  | 1729018 | IL13     |
| 4229.852 | -4354 | 1.44E-04 | 2231 | 0.333333 | 3.399541 | 1821928 | CAMK1D   |
| 4254.944 | -4354 | 1.44E-04 | 2158 | 0.333333 | 3.399541 | 1829712 | TNIK     |
| 4376.242 | -4354 | 1.44E-04 | 2015 | 0.333333 | 3.399541 | 1834024 | RHOBTB1  |
| 4204.341 | -4354 | 1.44E-04 | 1949 | 0.333333 | 3.399541 | 1773456 | CD40LG   |
| 4239.378 | -4354 | 1.44E-04 | 1917 | 0.333333 | 3.399541 | 1784828 | RAB8A    |
| 4008.505 | -4354 | 1.44E-04 | 1910 | 0.333333 | 3.399541 | 1754522 | TWIST1   |

|          |       |          |      |          |          |         |         |
|----------|-------|----------|------|----------|----------|---------|---------|
| 3829.638 | -4354 | 1.44E-04 | 1906 | 0.333333 | 3.399541 | 1713072 | HEYL    |
| 4597.258 | -4354 | 1.44E-04 | 1892 | 0.333333 | 3.399541 | 1830452 | SV2A    |
| 3793.537 | -4354 | 1.44E-04 | 1873 | 0.333333 | 3.399541 | 1716940 | IL13RA2 |
| 4137.255 | -4354 | 1.44E-04 | 1862 | 0.333333 | 3.399541 | 1782066 | ACKR4   |
| 4249.812 | -4354 | 1.44E-04 | 2139 | 0.333333 | 3.399311 | 1794196 | PDGFC   |
| 4326.638 | -4354 | 1.44E-04 | 1931 | 0.333333 | 3.399311 | 1815450 | CCL2    |
| 4118.081 | -4354 | 1.44E-04 | 1855 | 0.333333 | 3.399311 | 1781862 | KRT1    |
| 3934.727 | -4354 | 1.44E-04 | 1861 | 0.333333 | 3.399082 | 1752082 | S100A9  |
| 5435.448 | -4354 | 1.44E-04 | 2058 | 0.333333 | 3.398852 | 1903932 | DLST    |
| 3803.804 | -4354 | 1.44E-04 | 1938 | 0.333333 | 3.398852 | 1704478 | CNTN2   |
| 3700.761 | -4354 | 1.44E-04 | 1892 | 0.333333 | 3.398852 | 1731132 | IL18R1  |
| 3985.251 | -4354 | 1.44E-04 | 1860 | 0.333333 | 3.398852 | 1718382 | EDA2R   |
| 4802.082 | -4354 | 1.43E-04 | 1958 | 0.333333 | 3.398622 | 1839826 | DERA    |
| 4448.014 | -4354 | 1.43E-04 | 1869 | 0.333333 | 3.398622 | 1786600 | PRDX1   |
| 4073.694 | -4354 | 1.43E-04 | 2096 | 0.333333 | 3.398163 | 1791642 | LMO7    |
| 5000.588 | -4354 | 1.43E-04 | 2083 | 0.333333 | 3.398163 | 1825692 | BIRC2   |
| 4161.502 | -4354 | 1.43E-04 | 1977 | 0.333333 | 3.397933 | 1796824 | EPHB3   |
| 4634.643 | -4354 | 1.43E-04 | 1955 | 0.333333 | 3.397933 | 1850082 | SALL4   |
| 4255.411 | -4354 | 1.43E-04 | 1940 | 0.333333 | 3.397933 | 1822140 | FKBP5   |
| 3937.455 | -4354 | 1.43E-04 | 1878 | 0.333333 | 3.397933 | 1736348 | BCL2A1  |
| 4476.975 | -4354 | 1.43E-04 | 2184 | 0.333333 | 3.397704 | 1792352 | CYP19A1 |
| 3930.924 | -4354 | 1.43E-04 | 2101 | 0.333333 | 3.397704 | 1789992 | TBC1D1  |
| 3958.346 | -4354 | 1.43E-04 | 1869 | 0.333333 | 3.397704 | 1768316 | ETV4    |
| 4497.726 | -4354 | 1.43E-04 | 1831 | 0.333333 | 3.397704 | 1795672 | DAGLA   |
| 4435.215 | -4354 | 1.43E-04 | 1983 | 0.333333 | 3.397474 | 1837254 | PNOC    |
| 3961.558 | -4354 | 1.43E-04 | 1901 | 0.333333 | 3.397474 | 1682600 | C8B     |
| 4092.335 | -4354 | 1.43E-04 | 2462 | 0.333333 | 3.397245 | 1766948 | FYN     |
| 4403.004 | -4354 | 1.43E-04 | 2120 | 0.333333 | 3.397245 | 1835354 | CYFIP2  |
| 4079.667 | -4354 | 1.43E-04 | 2114 | 0.333333 | 3.397245 | 1762990 | DKK2    |
| 4246.747 | -4354 | 1.43E-04 | 2005 | 0.333333 | 3.397245 | 1829878 | RHOBTB2 |
| 4311.997 | -4354 | 1.43E-04 | 2104 | 0.333333 | 3.397015 | 1818164 | CXXC4   |
| 3693.895 | -4354 | 1.43E-04 | 1870 | 0.333333 | 3.397015 | 1712214 | LGALS3  |
| 3607.318 | -4354 | 1.43E-04 | 1857 | 0.333333 | 3.397015 | 1698382 | RRAS    |
| 3857.983 | -4354 | 1.43E-04 | 1787 | 0.333333 | 3.397015 | 1764046 | ARNT2   |
| 3944.993 | -4354 | 1.43E-04 | 2216 | 0.333333 | 3.396785 | 1732046 | CNTN1   |
| 3973.152 | -4354 | 1.43E-04 | 1994 | 0.333333 | 3.396785 | 1706562 | ADCY8   |
| 4366.897 | -4354 | 1.43E-04 | 1910 | 0.333333 | 3.396785 | 1733768 | CCL16   |
| 4013.849 | -4354 | 1.43E-04 | 1791 | 0.333333 | 3.396785 | 1770886 | TP53I3  |
| 4564.199 | -4354 | 1.43E-04 | 1777 | 0.333333 | 3.396785 | 1792508 | ACP2    |
| 4123.296 | -4354 | 1.43E-04 | 2052 | 0.333333 | 3.396326 | 1779852 | IL7     |
| 4195.786 | -4354 | 1.43E-04 | 1950 | 0.333333 | 3.396326 | 1787928 | CCR7    |

|          |       |          |      |          |          |         |           |
|----------|-------|----------|------|----------|----------|---------|-----------|
| 3767.907 | -4354 | 1.43E-04 | 1874 | 0.333333 | 3.396326 | 1674886 | ROS1      |
| 4218.166 | -4354 | 1.43E-04 | 2158 | 0.333333 | 3.396096 | 1773992 | PTK2B     |
| 3786.342 | -4354 | 1.43E-04 | 2023 | 0.333333 | 3.396096 | 1680142 | A2M       |
| 3988.405 | -4354 | 1.43E-04 | 1952 | 0.333333 | 3.396096 | 1748228 | ATP1B1    |
| 3818.05  | -4354 | 1.43E-04 | 1916 | 0.333333 | 3.396096 | 1712028 | HEY1      |
| 3993.207 | -4354 | 1.43E-04 | 1814 | 0.333333 | 3.396096 | 1706704 | CDX2      |
| 3708.512 | -4354 | 1.43E-04 | 1990 | 0.333333 | 3.395867 | 1688564 | DUSP6     |
| 3982.858 | -4354 | 1.43E-04 | 1836 | 0.333333 | 3.395867 | 1736988 | DUSP5     |
| 3987.528 | -4354 | 1.43E-04 | 1826 | 0.333333 | 3.395867 | 1685832 | FZD9      |
| 4093.09  | -4354 | 1.43E-04 | 1773 | 0.333333 | 3.395867 | 1733720 | SCT       |
| 4240.554 | -4354 | 1.43E-04 | 1949 | 0.333333 | 3.395637 | 1786928 | PPIF      |
| 3617.811 | -4354 | 1.43E-04 | 1909 | 0.333333 | 3.395637 | 1667456 | VSIG4     |
| 3663.918 | -4354 | 1.43E-04 | 1884 | 0.333333 | 3.395637 | 1701482 | ALPL      |
| 4040.794 | -4354 | 1.43E-04 | 1782 | 0.333333 | 3.395637 | 1759026 | BEX1      |
| 4206.97  | -4354 | 1.43E-04 | 2116 | 0.333333 | 3.395408 | 1736868 | CCR3      |
| 4188.085 | -4354 | 1.43E-04 | 2071 | 0.333333 | 3.395408 | 1734872 | ARPC5     |
| 4269     | -4354 | 1.43E-04 | 2011 | 0.333333 | 3.395178 | 1757022 | WNT7A     |
| 4801.98  | -4354 | 1.43E-04 | 1866 | 0.333333 | 3.395178 | 1812752 | ECHS1     |
| 3732.298 | -4354 | 1.43E-04 | 1861 | 0.333333 | 3.395178 | 1659144 | SERPIND1  |
| 4175.17  | -4354 | 1.43E-04 | 2114 | 0.333333 | 3.394948 | 1788620 | PTPN13    |
| 4771.64  | -4354 | 1.43E-04 | 1954 | 0.333333 | 3.394948 | 1791170 | PTGES3    |
| 4890.519 | -4354 | 1.43E-04 | 1734 | 0.333333 | 3.394948 | 1845346 | SPATA2L   |
| 4687.371 | -4354 | 1.43E-04 | 2105 | 0.333333 | 3.394489 | 1799864 | CASP3     |
| 4691.847 | -4354 | 1.43E-04 | 1870 | 0.333333 | 3.394489 | 1795808 | GABARAPL2 |
| 4023.286 | -4354 | 1.43E-04 | 2018 | 0.333333 | 3.394259 | 1745378 | NECTIN3   |
| 4380.164 | -4354 | 1.43E-04 | 1991 | 0.333333 | 3.394259 | 1789374 | CA3       |
| 6193.019 | -4354 | 1.43E-04 | 2284 | 0.333333 | 3.39403  | 1979002 | ESR1      |
| 4632.181 | -4354 | 1.43E-04 | 1980 | 0.333333 | 3.39403  | 1828948 | EVL       |
| 4108.347 | -4354 | 1.43E-04 | 1960 | 0.333333 | 3.39403  | 1746452 | DUSP10    |
| 4236.094 | -4354 | 1.43E-04 | 1802 | 0.333333 | 3.39403  | 1752400 | CASP5     |
| 4094.031 | -4354 | 1.43E-04 | 2009 | 0.333333 | 3.3938   | 1778304 | RYR1      |
| 4032.261 | -4354 | 1.43E-04 | 1852 | 0.333333 | 3.3938   | 1740158 | G6PD      |
| 4191.164 | -4354 | 1.43E-04 | 1833 | 0.333333 | 3.3938   | 1684624 | GRK1      |
| 3723.533 | -4354 | 1.43E-04 | 1742 | 0.333333 | 3.3938   | 1705684 | LTC4S     |
| 4089.061 | -4354 | 1.43E-04 | 2201 | 0.333333 | 3.393571 | 1746338 | MAP4K4    |
| 3803.474 | -4354 | 1.43E-04 | 1993 | 0.333333 | 3.393571 | 1717520 | GPER1     |
| 4635.519 | -4354 | 1.43E-04 | 1891 | 0.333333 | 3.393571 | 1750880 | MYLK2     |
| 3956.762 | -4354 | 1.43E-04 | 1883 | 0.333333 | 3.393571 | 1665324 | ATP4A     |
| 4163.294 | -4354 | 1.43E-04 | 2076 | 0.333333 | 3.393341 | 1766174 | NOTCH1    |
| 4321.114 | -4354 | 1.43E-04 | 1931 | 0.333333 | 3.393341 | 1735066 | UGP2      |
| 5088.69  | -4354 | 1.43E-04 | 1926 | 0.333333 | 3.393341 | 1837868 | ITK       |



|          |       |          |      |          |          |         |           |
|----------|-------|----------|------|----------|----------|---------|-----------|
| 4501.228 | -4354 | 1.43E-04 | 1920 | 0.333333 | 3.393341 | 1785294 | CCNG1     |
| 3763.321 | -4354 | 1.43E-04 | 2087 | 0.333333 | 3.393111 | 1666036 | CHRM2     |
| 4299.111 | -4354 | 1.43E-04 | 1998 | 0.333333 | 3.393111 | 1785464 | HACD1     |
| 3931.945 | -4354 | 1.43E-04 | 1789 | 0.333333 | 3.393111 | 1663584 | TULP1     |
| 4081.162 | -4354 | 1.43E-04 | 1783 | 0.333333 | 3.393111 | 1714982 | MYLPF     |
| 3861.919 | -4354 | 1.43E-04 | 1860 | 0.333333 | 3.392882 | 1670292 | NCF4      |
| 4428.732 | -4354 | 1.43E-04 | 1787 | 0.333333 | 3.392882 | 1776848 | CTSF      |
| 4273.292 | -4354 | 1.43E-04 | 1779 | 0.333333 | 3.392882 | 1721760 | KRTAP8-1  |
| 4337.843 | -4354 | 1.43E-04 | 1863 | 0.333333 | 3.392652 | 1763644 | CCL7      |
| 4265.603 | -4354 | 1.43E-04 | 1773 | 0.333333 | 3.392652 | 1736166 | TUBB2B    |
| 4360.812 | -4354 | 1.43E-04 | 2008 | 0.333333 | 3.392423 | 1691466 | SERPINC1  |
| 3800.336 | -4354 | 1.43E-04 | 1860 | 0.333333 | 3.392193 | 1702512 | FXD2      |
| 4110.972 | -4354 | 1.43E-04 | 1855 | 0.333333 | 3.392193 | 1755110 | ICAM4     |
| 5257.7   | -4354 | 1.43E-04 | 2041 | 0.333333 | 3.391963 | 1957880 | MEF2C     |
| 3809.917 | -4354 | 1.43E-04 | 1849 | 0.333333 | 3.391963 | 1694594 | NOD2      |
| 4367.841 | -4354 | 1.43E-04 | 2207 | 0.333333 | 3.391734 | 1745842 | GNAQ      |
| 3759.578 | -4354 | 1.43E-04 | 2203 | 0.333333 | 3.391734 | 1686836 | JAG1      |
| 4104.911 | -4354 | 1.43E-04 | 2041 | 0.333333 | 3.391734 | 1747270 | WASF2     |
| 4105.569 | -4354 | 1.43E-04 | 1975 | 0.333333 | 3.391734 | 1679732 | WIF1      |
| 3578.844 | -4354 | 1.43E-04 | 1938 | 0.333333 | 3.391734 | 1651038 | VCAN      |
| 4522.087 | -4354 | 1.43E-04 | 1815 | 0.333333 | 3.391734 | 1779654 | ABCF1     |
| 3683.843 | -4354 | 1.43E-04 | 2152 | 0.333333 | 3.391504 | 1652932 | AGTR1     |
| 4199.948 | -4354 | 1.43E-04 | 2033 | 0.333333 | 3.391504 | 1689514 | APOB      |
| 4091.161 | -4354 | 1.43E-04 | 1955 | 0.333333 | 3.391504 | 1734126 | TIPARP    |
| 4439.925 | -4354 | 1.43E-04 | 1903 | 0.333333 | 3.391504 | 1734050 | FGF3      |
| 4108.627 | -4354 | 1.43E-04 | 1840 | 0.333333 | 3.391504 | 1746166 | RND1      |
| 3878.409 | -4354 | 1.43E-04 | 1768 | 0.333333 | 3.391504 | 1709454 | TNFRSF10D |
| 3868.367 | -4354 | 1.43E-04 | 2150 | 0.333333 | 3.391274 | 1728422 | EPHA4     |
| 4256.451 | -4354 | 1.43E-04 | 1861 | 0.333333 | 3.391274 | 1700366 | PPT1      |
| 3739.539 | -4354 | 1.43E-04 | 1784 | 0.333333 | 3.391274 | 1692620 | FADS3     |
| 3800.055 | -4354 | 1.43E-04 | 1995 | 0.333333 | 3.391045 | 1657782 | GABRA1    |
| 4271.11  | -4354 | 1.43E-04 | 1949 | 0.333333 | 3.391045 | 1684466 | C3AR1     |
| 3881.536 | -4354 | 1.43E-04 | 1919 | 0.333333 | 3.391045 | 1684148 | CYP7B1    |
| 4413.702 | -4354 | 1.43E-04 | 1843 | 0.333333 | 3.391045 | 1761294 | INPPL1    |
| 4027.391 | -4354 | 1.43E-04 | 2012 | 0.333333 | 3.390815 | 1739306 | FUT8      |
| 3790.849 | -4354 | 1.43E-04 | 2092 | 0.333333 | 3.390586 | 1713418 | CADM1     |
| 3934.916 | -4354 | 1.43E-04 | 1921 | 0.333333 | 3.390586 | 1656446 | FGF20     |
| 4993.042 | -4354 | 1.43E-04 | 2231 | 0.333333 | 3.390356 | 1792666 | SYT1      |
| 4082.913 | -4354 | 1.43E-04 | 1984 | 0.333333 | 3.390356 | 1740034 | SLC20A1   |
| 5463.544 | -4354 | 1.43E-04 | 1970 | 0.333333 | 3.390356 | 1767540 | UQCRC1    |
| 3758.396 | -4354 | 1.43E-04 | 1884 | 0.333333 | 3.390356 | 1698248 | FHL1      |

|          |       |          |      |          |          |         |         |
|----------|-------|----------|------|----------|----------|---------|---------|
| 4259.159 | -4354 | 1.43E-04 | 1868 | 0.333333 | 3.390356 | 1693998 | ARPC3   |
| 4283.773 | -4354 | 1.43E-04 | 1817 | 0.333333 | 3.390356 | 1696154 | APOA4   |
| 4847.283 | -4354 | 1.43E-04 | 2115 | 0.333333 | 3.389897 | 1759184 | CDK7    |
| 4651.962 | -4354 | 1.43E-04 | 2044 | 0.333333 | 3.389897 | 1774094 | IKBKE   |
| 3462.833 | -4354 | 1.43E-04 | 1981 | 0.333333 | 3.389897 | 1647458 | PTGS1   |
| 4163.369 | -4354 | 1.43E-04 | 1894 | 0.333333 | 3.389897 | 1746058 | DGKA    |
| 3734.946 | -4354 | 1.43E-04 | 2242 | 0.333333 | 3.389667 | 1666140 | COL1A2  |
| 4608.578 | -4354 | 1.43E-04 | 1917 | 0.333333 | 3.389667 | 1731322 | SLC2A4  |
| 4513.304 | -4354 | 1.43E-04 | 1800 | 0.333333 | 3.389667 | 1794968 | IP6K1   |
| 4332.183 | -4354 | 1.43E-04 | 1751 | 0.333333 | 3.389667 | 1693786 | NTN3    |
| 4534.675 | -4354 | 1.43E-04 | 2070 | 0.333333 | 3.389437 | 1727616 | GABRB2  |
| 4484.862 | -4354 | 1.43E-04 | 1962 | 0.333333 | 3.389437 | 1744650 | GLUD1   |
| 3892.513 | -4354 | 1.43E-04 | 1838 | 0.333333 | 3.389437 | 1652752 | ARHGEF4 |
| 3840.041 | -4354 | 1.43E-04 | 1786 | 0.333333 | 3.389437 | 1657208 | ALOX12B |
| 4074.145 | -4354 | 1.43E-04 | 2114 | 0.333333 | 3.389208 | 1663098 | CD53    |
| 4013.073 | -4354 | 1.43E-04 | 2094 | 0.333333 | 3.389208 | 1727260 | RORA    |
| 3886.818 | -4354 | 1.43E-04 | 2087 | 0.333333 | 3.389208 | 1712034 | MAF     |
| 3399.319 | -4354 | 1.43E-04 | 1796 | 0.333333 | 3.389208 | 1610136 | PLAU    |
| 4041.594 | -4354 | 1.43E-04 | 1945 | 0.333333 | 3.388978 | 1697262 | ARSB    |
| 3856.91  | -4354 | 1.43E-04 | 1824 | 0.333333 | 3.388978 | 1706778 | STX1A   |
| 3599.704 | -4354 | 1.43E-04 | 1796 | 0.333333 | 3.388978 | 1624110 | NR2E1   |
| 3677.01  | -4354 | 1.43E-04 | 1765 | 0.333333 | 3.388978 | 1667236 | SCUBE2  |
| 4348.453 | -4354 | 1.43E-04 | 2001 | 0.333333 | 3.388749 | 1731940 | VAT1L   |
| 4434.779 | -4354 | 1.43E-04 | 1894 | 0.333333 | 3.388749 | 1673470 | PRKG2   |
| 4263.798 | -4354 | 1.43E-04 | 1835 | 0.333333 | 3.388749 | 1705170 | SHOC2   |
| 4174.095 | -4354 | 1.43E-04 | 2122 | 0.333333 | 3.388519 | 1703802 | CTNND2  |
| 4015.835 | -4354 | 1.43E-04 | 2013 | 0.333333 | 3.388519 | 1709024 | ACO1    |
| 4029.903 | -4354 | 1.43E-04 | 1943 | 0.333333 | 3.388519 | 1683388 | HLA-B   |
| 4363.303 | -4354 | 1.43E-04 | 1941 | 0.333333 | 3.388519 | 1747644 | PAK6    |
| 4728.719 | -4354 | 1.43E-04 | 1930 | 0.333333 | 3.388519 | 1748876 | MDH1    |
| 4632.919 | -4354 | 1.43E-04 | 1853 | 0.333333 | 3.388519 | 1794480 | CLDN1   |
| 3517.793 | -4354 | 1.43E-04 | 1811 | 0.333333 | 3.388519 | 1629434 | LILRB3  |
| 4052.868 | -4354 | 1.43E-04 | 1800 | 0.333333 | 3.388519 | 1650582 | AQP8    |
| 4324.672 | -4354 | 1.43E-04 | 1905 | 0.333333 | 3.388289 | 1710480 | UBE2E3  |
| 3993.588 | -4354 | 1.43E-04 | 1979 | 0.333333 | 3.38806  | 1691006 | MKNK1   |
| 3743.499 | -4354 | 1.43E-04 | 1918 | 0.333333 | 3.38806  | 1698888 | IL12RB2 |
| 4094.418 | -4354 | 1.43E-04 | 1812 | 0.333333 | 3.38806  | 1670808 | HRC     |
| 3371.466 | -4354 | 1.43E-04 | 1797 | 0.333333 | 3.38806  | 1603452 | LILRB5  |
| 3448.41  | -4354 | 1.43E-04 | 1885 | 0.333333 | 3.38783  | 1601924 | C5AR1   |
| 3557.628 | -4354 | 1.43E-04 | 1833 | 0.333333 | 3.38783  | 1639314 | IL1R2   |
| 4268.821 | -4354 | 1.43E-04 | 2119 | 0.333333 | 3.3876   | 1712900 | ACTB    |

|          |       |          |      |          |          |         |         |
|----------|-------|----------|------|----------|----------|---------|---------|
| 4252.204 | -4354 | 1.43E-04 | 2103 | 0.333333 | 3.3876   | 1705230 | CACNA1C |
| 4481.721 | -4354 | 1.43E-04 | 1930 | 0.333333 | 3.3876   | 1682540 | KL      |
| 4172.813 | -4354 | 1.43E-04 | 1871 | 0.333333 | 3.3876   | 1687830 | ELANE   |
| 4479.526 | -4354 | 1.42E-04 | 2150 | 0.333333 | 3.387371 | 1720788 | MAPK6   |
| 4150.385 | -4354 | 1.42E-04 | 2070 | 0.333333 | 3.387371 | 1737524 | JARID2  |
| 3906.656 | -4354 | 1.42E-04 | 1969 | 0.333333 | 3.387371 | 1658038 | ATP1A2  |
| 3552.44  | -4354 | 1.42E-04 | 1875 | 0.333333 | 3.387371 | 1598478 | SELE    |
| 3827.659 | -4354 | 1.42E-04 | 2192 | 0.333333 | 3.387141 | 1689264 | PRKCA   |
| 3987.189 | -4354 | 1.42E-04 | 2098 | 0.333333 | 3.387141 | 1692074 | GRK5    |
| 3314.152 | -4354 | 1.42E-04 | 1789 | 0.333333 | 3.387141 | 1600394 | THBS4   |
| 5130.179 | -4354 | 1.42E-04 | 2130 | 0.333333 | 3.386912 | 1815354 | PLK1    |
| 4800.789 | -4354 | 1.42E-04 | 2060 | 0.333333 | 3.386912 | 1764008 | AXIN1   |
| 3830.599 | -4354 | 1.42E-04 | 2035 | 0.333333 | 3.386912 | 1674174 | DUSP3   |
| 3730.241 | -4354 | 1.42E-04 | 1988 | 0.333333 | 3.386912 | 1611748 | TNFAIP3 |
| 3824.957 | -4354 | 1.42E-04 | 2018 | 0.333333 | 3.386452 | 1655566 | PDGFD   |
| 6410.436 | -4354 | 1.42E-04 | 1952 | 0.333333 | 3.386452 | 2159700 | PPP1CA  |
| 3895.002 | -4354 | 1.42E-04 | 1834 | 0.333333 | 3.386452 | 1691300 | ERN1    |
| 5388.55  | -4354 | 1.42E-04 | 1702 | 0.333333 | 3.386452 | 1833892 | MT-CO1  |
| 3677.774 | -4354 | 1.42E-04 | 2022 | 0.333333 | 3.386223 | 1661202 | CCND2   |
| 5454.463 | -4354 | 1.42E-04 | 1970 | 0.333333 | 3.385993 | 1782698 | AGL     |
| 4237.272 | -4354 | 1.42E-04 | 1840 | 0.333333 | 3.385993 | 1705740 | SLC16A4 |
| 4552.28  | -4354 | 1.42E-04 | 1788 | 0.333333 | 3.385993 | 1633902 | HYAL4   |
| 3502.302 | -4354 | 1.42E-04 | 1759 | 0.333333 | 3.385993 | 1629710 | MT2A    |
| 4849.865 | -4354 | 1.42E-04 | 1904 | 0.333333 | 3.385763 | 1755302 | ACADM   |
| 3940.215 | -4354 | 1.42E-04 | 1733 | 0.333333 | 3.385763 | 1653946 | SLC2A6  |
| 3829.94  | -4354 | 1.42E-04 | 2115 | 0.333333 | 3.385534 | 1657692 | GNA14   |
| 4232.895 | -4354 | 1.42E-04 | 1861 | 0.333333 | 3.385534 | 1618312 | SLC22A2 |
| 3805.698 | -4354 | 1.42E-04 | 2084 | 0.333333 | 3.385304 | 1632694 | NRP2    |
| 3521.121 | -4354 | 1.42E-04 | 2000 | 0.333333 | 3.385304 | 1628224 | SPP1    |
| 3525.907 | -4354 | 1.42E-04 | 1837 | 0.333333 | 3.385304 | 1625376 | CD1D    |
| 4478.432 | -4354 | 1.42E-04 | 1836 | 0.333333 | 3.385075 | 1653726 | MANBA   |
| 3850.241 | -4354 | 1.42E-04 | 2020 | 0.333333 | 3.384845 | 1658598 | NCOA1   |
| 3767.665 | -4354 | 1.42E-04 | 1935 | 0.333333 | 3.384845 | 1671326 | PTPN14  |
| 4566.429 | -4354 | 1.42E-04 | 1828 | 0.333333 | 3.384845 | 1743656 | RAC3    |
| 3727.804 | -4354 | 1.42E-04 | 1814 | 0.333333 | 3.384845 | 1670948 | COL9A3  |
| 3739.886 | -4354 | 1.42E-04 | 1726 | 0.333333 | 3.384845 | 1635758 | KRT13   |
| 4279.516 | -4354 | 1.42E-04 | 1856 | 0.333333 | 3.384615 | 1718788 | ULK1    |
| 3827.596 | -4354 | 1.42E-04 | 1817 | 0.333333 | 3.384615 | 1597132 | IFNB1   |
| 4247.294 | -4354 | 1.42E-04 | 2431 | 0.333333 | 3.384386 | 1696646 | MAPK1   |
| 3903.402 | -4354 | 1.42E-04 | 2102 | 0.333333 | 3.384386 | 1667446 | ITPR1   |
| 4166.206 | -4354 | 1.42E-04 | 1866 | 0.333333 | 3.384386 | 1711244 | CBR1    |

|          |       |          |      |          |          |         |          |
|----------|-------|----------|------|----------|----------|---------|----------|
| 4048.625 | -4354 | 1.42E-04 | 1859 | 0.333333 | 3.384386 | 1672518 | ALOX12   |
| 4749.585 | -4354 | 1.42E-04 | 1855 | 0.333333 | 3.384386 | 1728894 | IRF3     |
| 4079.571 | -4354 | 1.42E-04 | 1745 | 0.333333 | 3.384386 | 1593672 | CLPS     |
| 3842.326 | -4354 | 1.42E-04 | 1735 | 0.333333 | 3.384386 | 1670540 | TNFSF9   |
| 3657.412 | -4354 | 1.42E-04 | 1733 | 0.333333 | 3.384386 | 1564028 | CACNA1F  |
| 4141.992 | -4354 | 1.42E-04 | 2071 | 0.333333 | 3.384156 | 1692126 | SIPA1L1  |
| 3606.279 | -4354 | 1.42E-04 | 1933 | 0.333333 | 3.384156 | 1574072 | GRM3     |
| 5735.634 | -4354 | 1.42E-04 | 1904 | 0.333333 | 3.384156 | 1881828 | CDC37    |
| 3434.248 | -4354 | 1.42E-04 | 1848 | 0.333333 | 3.384156 | 1581486 | CTSG     |
| 3601.898 | -4354 | 1.42E-04 | 1785 | 0.333333 | 3.384156 | 1578418 | RCVRN    |
| 3391.119 | -4354 | 1.42E-04 | 1846 | 0.333333 | 3.383927 | 1597836 | AQP1     |
| 4083.264 | -4354 | 1.42E-04 | 1752 | 0.333333 | 3.383927 | 1665212 | ROM1     |
| 3632.015 | -4354 | 1.42E-04 | 2093 | 0.333333 | 3.383697 | 1638000 | NRXN3    |
| 3671.818 | -4354 | 1.42E-04 | 2014 | 0.333333 | 3.383697 | 1613156 | PRNP     |
| 3760.525 | -4354 | 1.42E-04 | 1848 | 0.333333 | 3.383697 | 1655514 | SCD5     |
| 3606.857 | -4354 | 1.42E-04 | 1752 | 0.333333 | 3.383697 | 1624984 | DDAH2    |
| 4520.808 | -4354 | 1.42E-04 | 2011 | 0.333333 | 3.383467 | 1721466 | HRAS     |
| 3696.392 | -4354 | 1.42E-04 | 1972 | 0.333333 | 3.383467 | 1617474 | SEMA3C   |
| 4090.006 | -4354 | 1.42E-04 | 1938 | 0.333333 | 3.383467 | 1682768 | STIM1    |
| 3480.413 | -4354 | 1.42E-04 | 1894 | 0.333333 | 3.383467 | 1577982 | IL6      |
| 4988.969 | -4354 | 1.42E-04 | 1886 | 0.333333 | 3.383467 | 1798360 | ARHGEF1  |
| 4208.732 | -4354 | 1.42E-04 | 1870 | 0.333333 | 3.383467 | 1707782 | SOD2     |
| 4237.846 | -4354 | 1.42E-04 | 1843 | 0.333333 | 3.383467 | 1691712 | KEAP1    |
| 4157.883 | -4354 | 1.42E-04 | 1883 | 0.333333 | 3.383238 | 1674070 | TYK2     |
| 4173.54  | -4354 | 1.42E-04 | 1879 | 0.333333 | 3.383238 | 1693846 | HYOU1    |
| 3832.979 | -4354 | 1.42E-04 | 1829 | 0.333333 | 3.383238 | 1610046 | NCF1     |
| 3508.474 | -4354 | 1.42E-04 | 2051 | 0.333333 | 3.383008 | 1595528 | NEDD9    |
| 3956.919 | -4354 | 1.42E-04 | 1925 | 0.333333 | 3.383008 | 1639806 | RPS6KA2  |
| 3652.118 | -4354 | 1.42E-04 | 1822 | 0.333333 | 3.383008 | 1597184 | MAP1LC3C |
| 3163.443 | -4354 | 1.42E-04 | 1738 | 0.333333 | 3.383008 | 1510312 | THEMIS2  |
| 5133.305 | -4354 | 1.42E-04 | 2103 | 0.333333 | 3.382778 | 1783518 | CDC20    |
| 4129.557 | -4354 | 1.42E-04 | 1995 | 0.333333 | 3.382778 | 1669694 | PIK3R2   |
| 4239.192 | -4354 | 1.42E-04 | 1830 | 0.333333 | 3.382778 | 1705408 | ACSM3    |
| 3675.98  | -4354 | 1.42E-04 | 1727 | 0.333333 | 3.382778 | 1592334 | DLX5     |
| 4533.508 | -4354 | 1.42E-04 | 2092 | 0.333333 | 3.382549 | 1708426 | MAP2K4   |
| 3929.99  | -4354 | 1.42E-04 | 1968 | 0.333333 | 3.382549 | 1637486 | NRIP1    |
| 3612.93  | -4354 | 1.42E-04 | 1944 | 0.333333 | 3.382549 | 1603286 | GNS      |
| 3339.154 | -4354 | 1.42E-04 | 1884 | 0.333333 | 3.382549 | 1561906 | SHC3     |
| 3722.423 | -4354 | 1.42E-04 | 1870 | 0.333333 | 3.382549 | 1619446 | GUCY1B1  |
| 3634.056 | -4354 | 1.42E-04 | 1773 | 0.333333 | 3.382549 | 1587800 | TLR1     |
| 4305.419 | -4354 | 1.42E-04 | 1715 | 0.333333 | 3.382549 | 1706296 | NAT1     |

|          |       |          |      |          |          |         |         |
|----------|-------|----------|------|----------|----------|---------|---------|
| 3650.091 | -4354 | 1.42E-04 | 2011 | 0.333333 | 3.382319 | 1629398 | ZFP36L1 |
| 4178.196 | -4354 | 1.42E-04 | 2156 | 0.333333 | 3.38209  | 1680216 | ERBB4   |
| 4507.03  | -4354 | 1.42E-04 | 1914 | 0.333333 | 3.38209  | 1723226 | CD3D    |
| 3671.878 | -4354 | 1.42E-04 | 1983 | 0.333333 | 3.38186  | 1645980 | AGPAT4  |
| 3921.07  | -4354 | 1.42E-04 | 1893 | 0.333333 | 3.38186  | 1680562 | GABBR1  |
| 4189.622 | -4354 | 1.42E-04 | 1743 | 0.333333 | 3.38186  | 1594222 | LMX1B   |
| 9743.669 | -4354 | 1.42E-04 | 1703 | 0.333333 | 3.38186  | 4012822 | DEFA5   |
| 4085.447 | -4354 | 1.42E-04 | 2090 | 0.333333 | 3.38163  | 1659682 | IFNG    |
| 4685.376 | -4354 | 1.42E-04 | 2073 | 0.333333 | 3.38163  | 1731504 | CXCL8   |
| 3970.382 | -4354 | 1.42E-04 | 1906 | 0.333333 | 3.38163  | 1672606 | FZD2    |
| 3740.289 | -4354 | 1.42E-04 | 1882 | 0.333333 | 3.38163  | 1615028 | APOE    |
| 4053.277 | -4354 | 1.42E-04 | 1823 | 0.333333 | 3.38163  | 1598714 | AVP     |
| 3670.852 | -4354 | 1.42E-04 | 1793 | 0.333333 | 3.38163  | 1619416 | SEMA4A  |
| 4106.477 | -4354 | 1.42E-04 | 1854 | 0.333333 | 3.381401 | 1627194 | PTH     |
| 3731.194 | -4354 | 1.42E-04 | 1777 | 0.333333 | 3.381401 | 1559192 | AKR1D1  |
| 4239.495 | -4354 | 1.42E-04 | 2016 | 0.333333 | 3.381171 | 1709430 | ELOVL6  |
| 4186.039 | -4354 | 1.42E-04 | 1893 | 0.333333 | 3.381171 | 1632492 | CSNK2B  |
| 3547.15  | -4354 | 1.42E-04 | 1890 | 0.333333 | 3.381171 | 1606858 | ABCC3   |
| 3154.005 | -4354 | 1.42E-04 | 1871 | 0.333333 | 3.381171 | 1517336 | MSN     |
| 3245.552 | -4354 | 1.42E-04 | 1866 | 0.333333 | 3.381171 | 1546372 | LPL     |
| 3523.377 | -4354 | 1.42E-04 | 1758 | 0.333333 | 3.381171 | 1540012 | CA5A    |
| 3659.998 | -4354 | 1.42E-04 | 1936 | 0.333333 | 3.380941 | 1605234 | HLA-DMB |
| 3524.59  | -4354 | 1.42E-04 | 1868 | 0.333333 | 3.380941 | 1589994 | VDR     |
| 4174.297 | -4354 | 1.42E-04 | 2345 | 0.333333 | 3.380712 | 1635938 | GRB2    |
| 3596.618 | -4354 | 1.42E-04 | 2057 | 0.333333 | 3.380712 | 1618770 | MET     |
| 3662.671 | -4354 | 1.42E-04 | 1862 | 0.333333 | 3.380712 | 1639346 | CREB3L2 |
| 3501.706 | -4354 | 1.42E-04 | 1791 | 0.333333 | 3.380712 | 1585422 | SLC34A2 |
| 3388.966 | -4354 | 1.42E-04 | 1737 | 0.333333 | 3.380712 | 1550700 | HAS1    |
| 3915.763 | -4354 | 1.42E-04 | 2195 | 0.333333 | 3.380482 | 1645726 | ITGB1   |
| 4155.211 | -4354 | 1.42E-04 | 2054 | 0.333333 | 3.380482 | 1587908 | IQGAP1  |
| 3746.451 | -4354 | 1.42E-04 | 1908 | 0.333333 | 3.380482 | 1606262 | ACSL4   |
| 4871.436 | -4354 | 1.42E-04 | 1843 | 0.333333 | 3.380482 | 1774094 | KAT2A   |
| 3426.107 | -4354 | 1.42E-04 | 1830 | 0.333333 | 3.380482 | 1562416 | ZFP36   |
| 4451.821 | -4354 | 1.42E-04 | 2112 | 0.333333 | 3.380253 | 1673224 | PPP2CA  |
| 4494.537 | -4354 | 1.42E-04 | 2049 | 0.333333 | 3.380253 | 1647098 | PSMB3   |
| 3999.897 | -4354 | 1.42E-04 | 1798 | 0.333333 | 3.380253 | 1608424 | PITX2   |
| 3999.976 | -4354 | 1.42E-04 | 1759 | 0.333333 | 3.380253 | 1669052 | MOK     |
| 4456.164 | -4354 | 1.42E-04 | 1687 | 0.333333 | 3.380253 | 1721360 | CIR1    |
| 3884.918 | -4354 | 1.42E-04 | 1972 | 0.333333 | 3.380023 | 1635652 | DGKG    |
| 3289.17  | -4354 | 1.42E-04 | 1936 | 0.333333 | 3.380023 | 1564224 | EDN1    |
| 5143.73  | -4354 | 1.42E-04 | 1775 | 0.333333 | 3.380023 | 1711904 | PGAM2   |

|          |       |          |      |          |          |         |          |
|----------|-------|----------|------|----------|----------|---------|----------|
| 4816.604 | -4354 | 1.42E-04 | 1738 | 0.333333 | 3.380023 | 1693404 | GPX4     |
| 3720.102 | -4354 | 1.42E-04 | 1722 | 0.333333 | 3.380023 | 1581690 | ATP6V0A4 |
| 4631.41  | -4354 | 1.42E-04 | 1864 | 0.333333 | 3.379793 | 1683636 | NF1      |
| 3207.544 | -4354 | 1.42E-04 | 1846 | 0.333333 | 3.379793 | 1547820 | MCAM     |
| 4615.965 | -4354 | 1.42E-04 | 1772 | 0.333333 | 3.379793 | 1724326 | MYBL2    |
| 3512.039 | -4354 | 1.42E-04 | 2056 | 0.333333 | 3.379564 | 1570204 | ACTN1    |
| 3340.525 | -4354 | 1.42E-04 | 2035 | 0.333333 | 3.379564 | 1571834 | ADAMTS1  |
| 3748.131 | -4354 | 1.42E-04 | 1971 | 0.333333 | 3.379564 | 1592288 | ADRA1B   |
| 3807.428 | -4354 | 1.42E-04 | 1953 | 0.333333 | 3.379564 | 1625992 | TGFA     |
| 3442.844 | -4354 | 1.42E-04 | 1731 | 0.333333 | 3.379564 | 1511310 | GJA8     |
| 4472.074 | -4354 | 1.42E-04 | 1964 | 0.333333 | 3.379334 | 1683418 | CDK5     |
| 3362.311 | -4354 | 1.42E-04 | 1953 | 0.333333 | 3.379334 | 1555710 | PTGS2    |
| 3390.114 | -4354 | 1.42E-04 | 1943 | 0.333333 | 3.379334 | 1549006 | FGF2     |
| 4300.276 | -4354 | 1.42E-04 | 1935 | 0.333333 | 3.379334 | 1649286 | SCP2     |
| 3412.588 | -4354 | 1.42E-04 | 1923 | 0.333333 | 3.379334 | 1560854 | MMP3     |
| 3438.08  | -4354 | 1.42E-04 | 1834 | 0.333333 | 3.379334 | 1553690 | JAM2     |
| 3580.596 | -4354 | 1.42E-04 | 1826 | 0.333333 | 3.379334 | 1576314 | JUNB     |
| 3819.613 | -4354 | 1.42E-04 | 1740 | 0.333333 | 3.379334 | 1568344 | PIK3C2G  |
| 4118.224 | -4354 | 1.42E-04 | 2114 | 0.333333 | 3.379104 | 1661284 | TGFBR1   |
| 4075.58  | -4354 | 1.42E-04 | 1867 | 0.333333 | 3.379104 | 1648306 | PPBP     |
| 4475.755 | -4354 | 1.42E-04 | 1817 | 0.333333 | 3.379104 | 1712254 | YY1AP1   |
| 3828.519 | -4354 | 1.42E-04 | 1810 | 0.333333 | 3.379104 | 1605544 | SLC5A1   |
| 4130.002 | -4354 | 1.42E-04 | 1844 | 0.333333 | 3.378875 | 1667948 | DDB2     |
| 3848.697 | -4354 | 1.42E-04 | 1817 | 0.333333 | 3.378875 | 1608962 | LPIN2    |
| 3184.944 | -4354 | 1.42E-04 | 1728 | 0.333333 | 3.378875 | 1486770 | TNN      |
| 4203.55  | -4354 | 1.42E-04 | 1692 | 0.333333 | 3.378875 | 1655522 | ATP6V1G2 |
| 3323.86  | -4354 | 1.42E-04 | 1900 | 0.333333 | 3.378645 | 1535360 | NTSR1    |
| 4137.922 | -4354 | 1.42E-04 | 1828 | 0.333333 | 3.378645 | 1618908 | CCL27    |
| 4620.157 | -4354 | 1.42E-04 | 1892 | 0.333333 | 3.378416 | 1715998 | ABCB7    |
| 3542.229 | -4354 | 1.42E-04 | 1838 | 0.333333 | 3.378416 | 1561594 | IL10     |
| 3753.079 | -4354 | 1.42E-04 | 1928 | 0.333333 | 3.378186 | 1583274 | MAP3K8   |
| 3948.653 | -4354 | 1.42E-04 | 1828 | 0.333333 | 3.378186 | 1634360 | MAD1L1   |
| 4207.204 | -4354 | 1.42E-04 | 1752 | 0.333333 | 3.378186 | 1604660 | RRAGA    |
| 4419.879 | -4354 | 1.42E-04 | 1729 | 0.333333 | 3.378186 | 1683134 | MYL12B   |
| 4462.662 | -4354 | 1.42E-04 | 1890 | 0.333333 | 3.377956 | 1667660 | UBE4A    |
| 4150.583 | -4354 | 1.42E-04 | 2148 | 0.333333 | 3.377727 | 1670424 | SP1      |
| 5667.295 | -4354 | 1.42E-04 | 1806 | 0.333333 | 3.377727 | 1632782 | UCP1     |
| 3499.339 | -4354 | 1.42E-04 | 1789 | 0.333333 | 3.377727 | 1593678 | CISH     |
| 4253.204 | -4354 | 1.42E-04 | 1762 | 0.333333 | 3.377727 | 1648312 | OXCT1    |
| 3291.116 | -4354 | 1.42E-04 | 1812 | 0.333333 | 3.377497 | 1502662 | CFI      |
| 4182.16  | -4354 | 1.42E-04 | 2044 | 0.333333 | 3.377268 | 1645186 | SATB1    |

|          |       |          |      |          |          |         |        |
|----------|-------|----------|------|----------|----------|---------|--------|
| 4466.774 | -4354 | 1.42E-04 | 2042 | 0.333333 | 3.377268 | 1698080 | AR     |
| 3234.444 | -4354 | 1.42E-04 | 1895 | 0.333333 | 3.377268 | 1524956 | IGFBP3 |
| 3990.124 | -4354 | 1.42E-04 | 1867 | 0.333333 | 3.377268 | 1591700 | PAX6   |
| 4762.055 | -4354 | 1.42E-04 | 1855 | 0.333333 | 3.377268 | 1689906 | EEF2   |
| 4329.69  | -4354 | 1.42E-04 | 1713 | 0.333333 | 3.377268 | 1720910 | LCN2   |
| 4448.267 | -4354 | 1.42E-04 | 1695 | 0.333333 | 3.377268 | 1650382 | BANF1  |
| 3116.037 | -4354 | 1.42E-04 | 1826 | 0.333333 | 3.377038 | 1483188 | CD93   |
| 3583.787 | -4354 | 1.42E-04 | 1765 | 0.333333 | 3.377038 | 1512090 | SLC9A3 |
| 4362.112 | -4354 | 1.42E-04 | 1707 | 0.333333 | 3.377038 | 1650780 | ECI2   |
| 4197.663 | -4354 | 1.42E-04 | 1840 | 0.333333 | 3.376808 | 1641424 | PRKAG1 |
| 3248.605 | -4354 | 1.42E-04 | 1836 | 0.333333 | 3.376808 | 1470368 | HTR6   |
| 3636.109 | -4354 | 1.42E-04 | 1918 | 0.333333 | 3.376579 | 1534528 | LPAR4  |
| 3449.255 | -4354 | 1.42E-04 | 1899 | 0.333333 | 3.376579 | 1555320 | P2RY1  |
| 3652.773 | -4354 | 1.42E-04 | 1819 | 0.333333 | 3.376579 | 1574880 | STX3   |
| 3855.495 | -4354 | 1.42E-04 | 1707 | 0.333333 | 3.376579 | 1567162 | IL34   |
| 4576.757 | -4354 | 1.42E-04 | 2200 | 0.333333 | 3.376349 | 1653412 | GSK3B  |
| 3380.943 | -4354 | 1.42E-04 | 1893 | 0.333333 | 3.376349 | 1536394 | SLC1A3 |
| 4510.098 | -4354 | 1.42E-04 | 2007 | 0.333333 | 3.376119 | 1623304 | PSMC4  |
| 3856.89  | -4354 | 1.42E-04 | 1932 | 0.333333 | 3.376119 | 1598054 | RAB5C  |
| 4294.911 | -4354 | 1.42E-04 | 1866 | 0.333333 | 3.376119 | 1654418 | BNIP3  |
| 3976.966 | -4354 | 1.42E-04 | 1860 | 0.333333 | 3.376119 | 1595302 | CCR10  |
| 3988.535 | -4354 | 1.42E-04 | 1814 | 0.333333 | 3.376119 | 1615604 | LEPR   |
| 3853.82  | -4354 | 1.42E-04 | 1777 | 0.333333 | 3.376119 | 1593032 | CX3CL1 |
| 3617.819 | -4354 | 1.42E-04 | 1769 | 0.333333 | 3.376119 | 1581438 | MXD1   |
| 3375.99  | -4354 | 1.42E-04 | 1719 | 0.333333 | 3.376119 | 1467142 | BMP10  |
| 3588.062 | -4354 | 1.41E-04 | 2097 | 0.333333 | 3.37566  | 1594492 | SMAD1  |
| 3402.714 | -4354 | 1.41E-04 | 1884 | 0.333333 | 3.37566  | 1552034 | EFNB2  |
| 3534.371 | -4354 | 1.41E-04 | 1807 | 0.333333 | 3.37566  | 1526470 | CNGA1  |
| 4333.951 | -4354 | 1.41E-04 | 1892 | 0.333333 | 3.375431 | 1669366 | CD3G   |
| 4086.558 | -4354 | 1.41E-04 | 1765 | 0.333333 | 3.375431 | 1613794 | RELT   |
| 3413.275 | -4354 | 1.41E-04 | 1711 | 0.333333 | 3.375431 | 1532624 | LGALS9 |
| 4317.927 | -4354 | 1.41E-04 | 2028 | 0.333333 | 3.375201 | 1646440 | LCK    |
| 4336.537 | -4354 | 1.41E-04 | 1973 | 0.333333 | 3.375201 | 1605288 | POU3F3 |
| 3964.573 | -4354 | 1.41E-04 | 1865 | 0.333333 | 3.375201 | 1622064 | CXCL3  |
| 3646.513 | -4354 | 1.41E-04 | 1832 | 0.333333 | 3.375201 | 1536998 | AKR1C4 |
| 4103.706 | -4354 | 1.41E-04 | 2007 | 0.333333 | 3.374971 | 1589066 | CA10   |
| 3561.738 | -4354 | 1.41E-04 | 1948 | 0.333333 | 3.374971 | 1557692 | IL7R   |
| 4358.028 | -4354 | 1.41E-04 | 1871 | 0.333333 | 3.374971 | 1717588 | ORM1   |
| 3750.975 | -4354 | 1.41E-04 | 1755 | 0.333333 | 3.374971 | 1513606 | IFNA21 |
| 3571.437 | -4354 | 1.41E-04 | 1731 | 0.333333 | 3.374971 | 1514380 | FGF17  |
| 3915.81  | -4354 | 1.41E-04 | 1985 | 0.333333 | 3.374742 | 1593026 | MPDZ   |

|          |       |          |      |          |          |         |          |
|----------|-------|----------|------|----------|----------|---------|----------|
| 4282.414 | -4354 | 1.41E-04 | 1952 | 0.333333 | 3.374742 | 1681254 | STRADB   |
| 3447.751 | -4354 | 1.41E-04 | 1937 | 0.333333 | 3.374742 | 1504896 | RIMS1    |
| 4291.665 | -4354 | 1.41E-04 | 1893 | 0.333333 | 3.374742 | 1595848 | PSMB10   |
| 3326.749 | -4354 | 1.41E-04 | 1855 | 0.333333 | 3.374742 | 1535998 | F5       |
| 3917.456 | -4354 | 1.41E-04 | 1790 | 0.333333 | 3.374742 | 1603072 | HOXA1    |
| 3589.329 | -4354 | 1.41E-04 | 1777 | 0.333333 | 3.374742 | 1572328 | TNFSF4   |
| 3674.972 | -4354 | 1.41E-04 | 1746 | 0.333333 | 3.374742 | 1583856 | F8       |
| 3855.868 | -4354 | 1.41E-04 | 1912 | 0.333333 | 3.374512 | 1609778 | SCD      |
| 4052.335 | -4354 | 1.41E-04 | 1798 | 0.333333 | 3.374512 | 1630744 | CARM1    |
| 3433.307 | -4354 | 1.41E-04 | 1766 | 0.333333 | 3.374512 | 1538980 | NECTIN2  |
| 4906.174 | -4354 | 1.41E-04 | 1663 | 0.333333 | 3.374512 | 1720226 | ATG4D    |
| 3681.073 | -4354 | 1.41E-04 | 2038 | 0.333333 | 3.374282 | 1584532 | IRS1     |
| 3831.333 | -4354 | 1.41E-04 | 2025 | 0.333333 | 3.374282 | 1610016 | RAB7A    |
| 4016.981 | -4354 | 1.41E-04 | 2011 | 0.333333 | 3.374282 | 1589000 | DCC      |
| 3829.635 | -4354 | 1.41E-04 | 1854 | 0.333333 | 3.374282 | 1568262 | KLKB1    |
| 3417.52  | -4354 | 1.41E-04 | 1765 | 0.333333 | 3.374282 | 1520534 | GLI1     |
| 3559.358 | -4354 | 1.41E-04 | 1756 | 0.333333 | 3.374282 | 1516418 | WNT1     |
| 3500.88  | -4354 | 1.41E-04 | 1645 | 0.333333 | 3.374282 | 1527994 | NDUFA4L2 |
| 3815.771 | -4354 | 1.41E-04 | 1859 | 0.333333 | 3.374053 | 1555410 | KCNK2    |
| 3822.67  | -4354 | 1.41E-04 | 1788 | 0.333333 | 3.374053 | 1604378 | CYP2S1   |
| 3931.045 | -4354 | 1.41E-04 | 2040 | 0.333333 | 3.373823 | 1616326 | PIK3CB   |
| 3537.869 | -4354 | 1.41E-04 | 1852 | 0.333333 | 3.373823 | 1558636 | ARNTL    |
| 3737.448 | -4354 | 1.41E-04 | 1789 | 0.333333 | 3.373823 | 1520650 | ANKRD1   |
| 3764.784 | -4354 | 1.41E-04 | 1754 | 0.333333 | 3.373823 | 1553322 | MYL3     |
| 4053.096 | -4354 | 1.41E-04 | 1708 | 0.333333 | 3.373823 | 1616478 | FZD6     |
| 3960.088 | -4354 | 1.41E-04 | 1935 | 0.333333 | 3.373594 | 1562062 | IL15     |
| 3418     | -4354 | 1.41E-04 | 1788 | 0.333333 | 3.373594 | 1500254 | SFRP5    |
| 4593.289 | -4354 | 1.41E-04 | 1855 | 0.333333 | 3.373364 | 1613934 | COX8A    |
| 3755.134 | -4354 | 1.41E-04 | 1814 | 0.333333 | 3.373364 | 1530148 | FGF8     |
| 4130.89  | -4354 | 1.41E-04 | 1766 | 0.333333 | 3.373364 | 1604270 | PRICKLE3 |
| 4029.779 | -4354 | 1.41E-04 | 1694 | 0.333333 | 3.373364 | 1580454 | TMSB4Y   |
| 3348.213 | -4354 | 1.41E-04 | 2091 | 0.333333 | 3.373134 | 1510772 | JAK1     |
| 3643.677 | -4354 | 1.41E-04 | 2051 | 0.333333 | 3.373134 | 1560434 | PIP4K2A  |
| 3906.479 | -4354 | 1.41E-04 | 1955 | 0.333333 | 3.373134 | 1587366 | PPARGC1A |
| 3818.007 | -4354 | 1.41E-04 | 1847 | 0.333333 | 3.373134 | 1540242 | IL12B    |
| 3818.965 | -4354 | 1.41E-04 | 1733 | 0.333333 | 3.373134 | 1588782 | PORCN    |
| 3813.063 | -4354 | 1.41E-04 | 1704 | 0.333333 | 3.373134 | 1599380 | SEMA4B   |
| 3732.067 | -4354 | 1.41E-04 | 1662 | 0.333333 | 3.373134 | 1573586 | CAMP     |
| 3426.828 | -4354 | 1.41E-04 | 2014 | 0.333333 | 3.372905 | 1500052 | ID4      |
| 3736.972 | -4354 | 1.41E-04 | 1941 | 0.333333 | 3.372905 | 1587208 | TFAP2C   |
| 3657.391 | -4354 | 1.41E-04 | 1743 | 0.333333 | 3.372905 | 1533430 | DNAJB6   |



|          |       |          |      |          |          |         |         |
|----------|-------|----------|------|----------|----------|---------|---------|
| 3195.987 | -4354 | 1.41E-04 | 1722 | 0.333333 | 3.372905 | 1500878 | MMP1    |
| 4258.873 | -4354 | 1.41E-04 | 1698 | 0.333333 | 3.372905 | 1602012 | CCL24   |
| 3264.527 | -4354 | 1.41E-04 | 1825 | 0.333333 | 3.372675 | 1513776 | SYNPO   |
| 3188.267 | -4354 | 1.41E-04 | 1780 | 0.333333 | 3.372675 | 1504140 | ITGA1   |
| 3220.674 | -4354 | 1.41E-04 | 1675 | 0.333333 | 3.372675 | 1493532 | STEAP4  |
| 4524.728 | -4354 | 1.41E-04 | 1866 | 0.333333 | 3.372445 | 1624054 | EIF2B1  |
| 3814.313 | -4354 | 1.41E-04 | 1701 | 0.333333 | 3.372445 | 1561588 | PLAAT3  |
| 3523.188 | -4354 | 1.41E-04 | 1699 | 0.333333 | 3.372445 | 1491954 | PLXNB3  |
| 3327.275 | -4354 | 1.41E-04 | 1902 | 0.333333 | 3.372216 | 1490552 | CTSC    |
| 3611.601 | -4354 | 1.41E-04 | 1873 | 0.333333 | 3.372216 | 1482964 | HTR5A   |
| 3593.521 | -4354 | 1.41E-04 | 1741 | 0.333333 | 3.372216 | 1533018 | ICAM5   |
| 3915.456 | -4354 | 1.41E-04 | 1721 | 0.333333 | 3.372216 | 1583164 | TAMALIN |
| 3422.28  | -4354 | 1.41E-04 | 1717 | 0.333333 | 3.372216 | 1457690 | RBPJL   |
| 3185.033 | -4354 | 1.41E-04 | 1647 | 0.333333 | 3.372216 | 1428932 | ASIC4   |
| 3696.078 | -4354 | 1.41E-04 | 1918 | 0.333333 | 3.371986 | 1546102 | NRCAM   |
| 3403.597 | -4354 | 1.41E-04 | 1844 | 0.333333 | 3.371986 | 1476458 | IFNGR1  |
| 3843.078 | -4354 | 1.41E-04 | 1824 | 0.333333 | 3.371986 | 1503074 | PNLIP   |
| 3677.229 | -4354 | 1.41E-04 | 1726 | 0.333333 | 3.371986 | 1491206 | GCK     |
| 3722.132 | -4354 | 1.41E-04 | 1703 | 0.333333 | 3.371986 | 1598196 | FOXO4   |
| 3620.848 | -4354 | 1.41E-04 | 1847 | 0.333333 | 3.371757 | 1508412 | MARCKS  |
| 3644.495 | -4354 | 1.41E-04 | 1818 | 0.333333 | 3.371757 | 1568944 | INSIG1  |
| 3476.687 | -4354 | 1.41E-04 | 1734 | 0.333333 | 3.371757 | 1560022 | CBR3    |
| 3576.846 | -4354 | 1.41E-04 | 1645 | 0.333333 | 3.371757 | 1559648 | SLC6A9  |
| 4018.554 | -4354 | 1.41E-04 | 1988 | 0.333333 | 3.371527 | 1544020 | PSMB8   |
| 4386.378 | -4354 | 1.41E-04 | 2152 | 0.333333 | 3.371297 | 1575288 | PSMD14  |
| 3946.288 | -4354 | 1.41E-04 | 1977 | 0.333333 | 3.371068 | 1551318 | RASAL2  |
| 3554.586 | -4354 | 1.41E-04 | 1804 | 0.333333 | 3.371068 | 1539916 | FLT3    |
| 3264.171 | -4354 | 1.41E-04 | 1780 | 0.333333 | 3.371068 | 1502686 | IL6R    |
| 3274.019 | -4354 | 1.41E-04 | 1726 | 0.333333 | 3.371068 | 1442296 | CFHR4   |
| 3665.87  | -4354 | 1.41E-04 | 1703 | 0.333333 | 3.371068 | 1488424 | GYS2    |
| 3670.24  | -4354 | 1.41E-04 | 1685 | 0.333333 | 3.371068 | 1498904 | HPGDS   |
| 3552.069 | -4354 | 1.41E-04 | 1986 | 0.333333 | 3.370838 | 1510590 | CCR5    |
| 3733.625 | -4354 | 1.41E-04 | 1962 | 0.333333 | 3.370838 | 1567784 | LARGE1  |
| 3700.722 | -4354 | 1.41E-04 | 1741 | 0.333333 | 3.370838 | 1502452 | CYP46A1 |
| 3985.982 | -4354 | 1.41E-04 | 2022 | 0.333333 | 3.370608 | 1610836 | CDK6    |
| 3703.887 | -4354 | 1.41E-04 | 1970 | 0.333333 | 3.370608 | 1548694 | ATP2B1  |
| 3334.862 | -4354 | 1.41E-04 | 1795 | 0.333333 | 3.370608 | 1513388 | F2RL1   |
| 3453.21  | -4354 | 1.41E-04 | 1759 | 0.333333 | 3.370608 | 1494102 | CYP24A1 |
| 3264.742 | -4354 | 1.41E-04 | 1753 | 0.333333 | 3.370608 | 1503814 | ADCY3   |
| 3466.344 | -4354 | 1.41E-04 | 1727 | 0.333333 | 3.370608 | 1505880 | PARP4   |
| 3715.407 | -4354 | 1.41E-04 | 1975 | 0.333333 | 3.370379 | 1547398 | MECOM   |

|          |       |          |      |          |          |         |           |
|----------|-------|----------|------|----------|----------|---------|-----------|
| 3931.476 | -4354 | 1.41E-04 | 1894 | 0.333333 | 3.370379 | 1594664 | SLC16A1   |
| 3159.866 | -4354 | 1.41E-04 | 1773 | 0.333333 | 3.370379 | 1498788 | TNFRSF11A |
| 3275.034 | -4354 | 1.41E-04 | 1699 | 0.333333 | 3.370379 | 1447118 | PSAP      |
| 3835.647 | -4354 | 1.41E-04 | 2032 | 0.333333 | 3.370149 | 1590128 | NCOR2     |
| 3817.296 | -4354 | 1.41E-04 | 1856 | 0.333333 | 3.370149 | 1527824 | RPS6KA3   |
| 3580.589 | -4354 | 1.41E-04 | 1756 | 0.333333 | 3.370149 | 1545446 | SPINT1    |
| 3026.29  | -4354 | 1.41E-04 | 1727 | 0.333333 | 3.370149 | 1436168 | CP        |
| 3622.095 | -4354 | 1.41E-04 | 2002 | 0.333333 | 3.36992  | 1563960 | PARD3     |
| 3189.842 | -4354 | 1.41E-04 | 1842 | 0.333333 | 3.36992  | 1471656 | TGFB3     |
| 3336.943 | -4354 | 1.41E-04 | 1803 | 0.333333 | 3.36992  | 1480390 | FCGR2B    |
| 3662.878 | -4354 | 1.41E-04 | 1993 | 0.333333 | 3.36969  | 1509898 | GRIA1     |
| 5446.524 | -4354 | 1.41E-04 | 1729 | 0.333333 | 3.36969  | 1979268 | CHMP7     |
| 3287.401 | -4354 | 1.41E-04 | 1677 | 0.333333 | 3.36969  | 1502406 | RGS9      |
| 4250.432 | -4354 | 1.41E-04 | 1898 | 0.333333 | 3.36946  | 1600792 | MLH1      |
| 3640.926 | -4354 | 1.41E-04 | 1866 | 0.333333 | 3.36946  | 1469608 | F11       |
| 3867.987 | -4354 | 1.41E-04 | 1792 | 0.333333 | 3.36946  | 1596276 | VMP1      |
| 3462.498 | -4354 | 1.41E-04 | 1675 | 0.333333 | 3.36946  | 1458368 | SEMA6B    |
| 4102.929 | -4354 | 1.41E-04 | 2011 | 0.333333 | 3.369231 | 1614716 | NLK       |
| 3065.065 | -4354 | 1.41E-04 | 1818 | 0.333333 | 3.369231 | 1458604 | OSMR      |
| 3647.698 | -4354 | 1.41E-04 | 1812 | 0.333333 | 3.369231 | 1541008 | RAPGEF4   |
| 3274.607 | -4354 | 1.41E-04 | 1826 | 0.333333 | 3.369001 | 1459558 | LOX       |
| 3112.796 | -4354 | 1.41E-04 | 1782 | 0.333333 | 3.369001 | 1488124 | SDC3      |
| 4619.331 | -4354 | 1.41E-04 | 1759 | 0.333333 | 3.369001 | 1592532 | AIFM1     |
| 3944.214 | -4354 | 1.41E-04 | 1757 | 0.333333 | 3.369001 | 1586988 | GPX7      |
| 4016.213 | -4354 | 1.41E-04 | 1796 | 0.333333 | 3.368772 | 1561810 | GNG10     |
| 3760.29  | -4354 | 1.41E-04 | 1753 | 0.333333 | 3.368772 | 1529736 | ADPGK     |
| 3294.984 | -4354 | 1.41E-04 | 1782 | 0.333333 | 3.368542 | 1512004 | STEAP3    |
| 3446.557 | -4354 | 1.41E-04 | 1716 | 0.333333 | 3.368542 | 1475296 | GUCY2D    |
| 3251.755 | -4354 | 1.41E-04 | 1676 | 0.333333 | 3.368542 | 1440044 | CFHR5     |
| 3504.079 | -4354 | 1.41E-04 | 1939 | 0.333333 | 3.368312 | 1518022 | PLXNC1    |
| 4016.569 | -4354 | 1.41E-04 | 1884 | 0.333333 | 3.368312 | 1575628 | AHCY      |
| 4414.203 | -4354 | 1.41E-04 | 1769 | 0.333333 | 3.368312 | 1597796 | PLA2G4D   |
| 3899.909 | -4354 | 1.41E-04 | 1769 | 0.333333 | 3.368312 | 1517112 | SLC25A5   |
| 2967.466 | -4354 | 1.41E-04 | 1766 | 0.333333 | 3.368312 | 1401824 | MRC1      |
| 2927.824 | -4354 | 1.41E-04 | 1675 | 0.333333 | 3.368312 | 1412848 | CH25H     |
| 4653.05  | -4354 | 1.41E-04 | 1673 | 0.333333 | 3.368312 | 1619986 | PTGDS     |
| 3400.708 | -4354 | 1.41E-04 | 1949 | 0.333333 | 3.368083 | 1515584 | MBP       |
| 3640.557 | -4354 | 1.41E-04 | 1911 | 0.333333 | 3.368083 | 1562010 | MAP2K6    |
| 3378.75  | -4354 | 1.41E-04 | 1850 | 0.333333 | 3.368083 | 1506322 | COL9A2    |
| 3447.842 | -4354 | 1.41E-04 | 1846 | 0.333333 | 3.368083 | 1489766 | WNT5A     |
| 3704.674 | -4354 | 1.41E-04 | 1819 | 0.333333 | 3.368083 | 1511264 | TP73      |

|          |       |          |      |          |          |         |         |
|----------|-------|----------|------|----------|----------|---------|---------|
| 3725.27  | -4354 | 1.41E-04 | 1779 | 0.333333 | 3.368083 | 1464850 | FSHB    |
| 6415.645 | -4354 | 1.41E-04 | 1761 | 0.333333 | 3.368083 | 2716128 | MKNK2   |
| 3473.667 | -4354 | 1.41E-04 | 1688 | 0.333333 | 3.368083 | 1493714 | CST7    |
| 3249.923 | -4354 | 1.41E-04 | 1679 | 0.333333 | 3.368083 | 1436510 | GDF2    |
| 3825.344 | -4354 | 1.41E-04 | 1951 | 0.333333 | 3.367853 | 1533922 | SMAD6   |
| 4459.153 | -4354 | 1.41E-04 | 1656 | 0.333333 | 3.367853 | 1570930 | SEMA3B  |
| 3612.788 | -4354 | 1.41E-04 | 1951 | 0.333333 | 3.367623 | 1512256 | TJP1    |
| 3345.715 | -4354 | 1.41E-04 | 1829 | 0.333333 | 3.367623 | 1520536 | ABCB4   |
| 3517.941 | -4354 | 1.41E-04 | 1668 | 0.333333 | 3.367623 | 1478858 | IL1RL2  |
| 4361.258 | -4354 | 1.41E-04 | 1780 | 0.333333 | 3.367394 | 1577594 | PHB2    |
| 3643.638 | -4354 | 1.41E-04 | 1758 | 0.333333 | 3.367394 | 1483328 | THY1    |
| 3503.927 | -4354 | 1.41E-04 | 1715 | 0.333333 | 3.367394 | 1456052 | GDF3    |
| 3212.961 | -4354 | 1.41E-04 | 1705 | 0.333333 | 3.367394 | 1441142 | LILRB1  |
| 3180.59  | -4354 | 1.41E-04 | 1685 | 0.333333 | 3.367394 | 1469272 | DDIT4   |
| 3933.789 | -4354 | 1.41E-04 | 2037 | 0.333333 | 3.367164 | 1553994 | NFIA    |
| 3313.927 | -4354 | 1.41E-04 | 1851 | 0.333333 | 3.367164 | 1485972 | CKAP4   |
| 3030.544 | -4354 | 1.41E-04 | 1808 | 0.333333 | 3.367164 | 1419684 | GBP2    |
| 3625.508 | -4354 | 1.41E-04 | 1726 | 0.333333 | 3.367164 | 1481552 | ALDOA   |
| 3499.847 | -4354 | 1.41E-04 | 2058 | 0.333333 | 3.366935 | 1509812 | FGFR2   |
| 3526.658 | -4354 | 1.41E-04 | 1989 | 0.333333 | 3.366935 | 1509556 | PRKD1   |
| 3661.201 | -4354 | 1.41E-04 | 1816 | 0.333333 | 3.366935 | 1543496 | ELOVL7  |
| 3773.972 | -4354 | 1.41E-04 | 1773 | 0.333333 | 3.366935 | 1530978 | CD79A   |
| 3125.906 | -4354 | 1.41E-04 | 1881 | 0.333333 | 3.366705 | 1436512 | ITGA8   |
| 3216.672 | -4354 | 1.41E-04 | 1761 | 0.333333 | 3.366705 | 1475774 | LTF     |
| 3654.971 | -4354 | 1.41E-04 | 1720 | 0.333333 | 3.366705 | 1500072 | TNNC2   |
| 3082.687 | -4354 | 1.41E-04 | 1640 | 0.333333 | 3.366705 | 1447216 | LILRA6  |
| 3560.664 | -4354 | 1.41E-04 | 1737 | 0.333333 | 3.366475 | 1511204 | PIP5K1C |
| 3243.269 | -4354 | 1.41E-04 | 1734 | 0.333333 | 3.366475 | 1498442 | CDKN2B  |
| 3521.609 | -4354 | 1.41E-04 | 1701 | 0.333333 | 3.366475 | 1500136 | TBKBP1  |
| 4386.999 | -4354 | 1.41E-04 | 1696 | 0.333333 | 3.366475 | 1606816 | DHRS11  |
| 4054.583 | -4354 | 1.41E-04 | 1979 | 0.333333 | 3.366246 | 1582316 | SUCLG2  |
| 3736.493 | -4354 | 1.41E-04 | 1894 | 0.333333 | 3.366016 | 1513484 | VDAC2   |
| 3052.779 | -4354 | 1.41E-04 | 1756 | 0.333333 | 3.366016 | 1418524 | SAT1    |
| 3648.403 | -4354 | 1.41E-04 | 1704 | 0.333333 | 3.366016 | 1525434 | ALDH9A1 |
| 3229.623 | -4354 | 1.41E-04 | 1682 | 0.333333 | 3.366016 | 1425746 | MAN2B1  |
| 4840.514 | -4354 | 1.41E-04 | 1665 | 0.333333 | 3.366016 | 1578610 | PTGES2  |
| 3428.35  | -4354 | 1.41E-04 | 1834 | 0.333333 | 3.365786 | 1483836 | SEL1L3  |
| 3183.718 | -4354 | 1.41E-04 | 1806 | 0.333333 | 3.365786 | 1449200 | CACNB4  |
| 3022.142 | -4354 | 1.41E-04 | 1743 | 0.333333 | 3.365786 | 1418388 | PLAUR   |
| 3198.065 | -4354 | 1.41E-04 | 1666 | 0.333333 | 3.365786 | 1436346 | PRPH2   |
| 3538.148 | -4354 | 1.41E-04 | 1907 | 0.333333 | 3.365557 | 1509576 | ALCAM   |

|          |       |          |      |          |          |         |          |
|----------|-------|----------|------|----------|----------|---------|----------|
| 3844.603 | -4354 | 1.41E-04 | 1855 | 0.333333 | 3.365557 | 1505296 | UBE2M    |
| 3189.672 | -4354 | 1.41E-04 | 1816 | 0.333333 | 3.365557 | 1464068 | JAM3     |
| 3819.224 | -4354 | 1.41E-04 | 2038 | 0.333333 | 3.365327 | 1528786 | ANK3     |
| 3200.504 | -4354 | 1.41E-04 | 1809 | 0.333333 | 3.365327 | 1477068 | HPGD     |
| 3466.256 | -4354 | 1.41E-04 | 1660 | 0.333333 | 3.365327 | 1454976 | ANGPT4   |
| 4306.958 | -4354 | 1.41E-04 | 2129 | 0.333333 | 3.365098 | 1581648 | APC      |
| 3764.804 | -4354 | 1.41E-04 | 1977 | 0.333333 | 3.365098 | 1547848 | FER      |
| 3693.217 | -4354 | 1.41E-04 | 1797 | 0.333333 | 3.364868 | 1455558 | PRKCG    |
| 3391.748 | -4354 | 1.41E-04 | 1759 | 0.333333 | 3.364868 | 1460294 | PREX1    |
| 3237.386 | -4354 | 1.41E-04 | 1738 | 0.333333 | 3.364868 | 1448478 | GLUL     |
| 3254.417 | -4354 | 1.41E-04 | 1607 | 0.333333 | 3.364868 | 1397464 | KRT38    |
| 4113.922 | -4354 | 1.41E-04 | 1792 | 0.333333 | 3.364638 | 1534842 | SDHA     |
| 3231.324 | -4354 | 1.41E-04 | 1753 | 0.333333 | 3.364638 | 1425846 | C1QA     |
| 3474.987 | -4354 | 1.40E-04 | 1956 | 0.333333 | 3.364409 | 1501758 | CDK14    |
| 3110.508 | -4354 | 1.40E-04 | 1743 | 0.333333 | 3.364409 | 1368058 | GRP      |
| 3675.875 | -4354 | 1.40E-04 | 1723 | 0.333333 | 3.364409 | 1543184 | MCU      |
| 3114.48  | -4354 | 1.40E-04 | 1861 | 0.333333 | 3.364179 | 1415958 | PTAFR    |
| 4784.359 | -4354 | 1.40E-04 | 1824 | 0.333333 | 3.364179 | 1594682 | COX6C    |
| 3359.619 | -4354 | 1.40E-04 | 1730 | 0.333333 | 3.364179 | 1436686 | GPR3     |
| 4006.949 | -4354 | 1.40E-04 | 1653 | 0.333333 | 3.364179 | 1532636 | AAMP     |
| 3520.596 | -4354 | 1.40E-04 | 1781 | 0.333333 | 3.363949 | 1448594 | TNFSF18  |
| 2994.808 | -4354 | 1.40E-04 | 1726 | 0.333333 | 3.363949 | 1411686 | COMP     |
| 3928.275 | -4354 | 1.40E-04 | 2072 | 0.333333 | 3.36372  | 1521388 | PIK3CA   |
| 3919.629 | -4354 | 1.40E-04 | 1940 | 0.333333 | 3.36372  | 1536956 | CUX1     |
| 3419.049 | -4354 | 1.40E-04 | 1906 | 0.333333 | 3.36372  | 1473042 | NLGN1    |
| 4361.224 | -4354 | 1.40E-04 | 1779 | 0.333333 | 3.36372  | 1547458 | RPS6KB2  |
| 3541.895 | -4354 | 1.40E-04 | 1749 | 0.333333 | 3.36372  | 1479680 | IDO1     |
| 3725.971 | -4354 | 1.40E-04 | 1720 | 0.333333 | 3.36372  | 1503758 | CREB3    |
| 4231.417 | -4354 | 1.40E-04 | 1699 | 0.333333 | 3.36372  | 1497314 | FUCA2    |
| 3052.811 | -4354 | 1.40E-04 | 1694 | 0.333333 | 3.36372  | 1345128 | HOXD10   |
| 3448.417 | -4354 | 1.40E-04 | 1914 | 0.333333 | 3.36349  | 1500606 | MYH10    |
| 3571.156 | -4354 | 1.40E-04 | 1813 | 0.333333 | 3.36349  | 1476478 | IRAK1    |
| 3245.343 | -4354 | 1.40E-04 | 1783 | 0.333333 | 3.36349  | 1461554 | TJP2     |
| 3536.744 | -4354 | 1.40E-04 | 1681 | 0.333333 | 3.36349  | 1478908 | ASL      |
| 3446.755 | -4354 | 1.40E-04 | 1675 | 0.333333 | 3.36349  | 1500786 | TP53INP2 |
| 3165.577 | -4354 | 1.40E-04 | 1658 | 0.333333 | 3.36349  | 1425854 | METRNL   |
| 3222.571 | -4354 | 1.40E-04 | 1610 | 0.333333 | 3.36349  | 1389892 | TREH     |
| 3736.196 | -4354 | 1.40E-04 | 2051 | 0.333333 | 3.363261 | 1517682 | IGF1R    |
| 3445.562 | -4354 | 1.40E-04 | 1860 | 0.333333 | 3.363261 | 1420612 | PTGFR    |
| 3254.617 | -4354 | 1.40E-04 | 1796 | 0.333333 | 3.363261 | 1454502 | HMGA2    |
| 4025.092 | -4354 | 1.40E-04 | 1674 | 0.333333 | 3.363261 | 1555098 | MYL6B    |

|          |       |          |      |          |          |         |         |
|----------|-------|----------|------|----------|----------|---------|---------|
| 3426.421 | -4354 | 1.40E-04 | 1800 | 0.333333 | 3.362801 | 1450906 | RSPO3   |
| 3070.619 | -4354 | 1.40E-04 | 1730 | 0.333333 | 3.362801 | 1392770 | FZD10   |
| 4050.634 | -4354 | 1.40E-04 | 1661 | 0.333333 | 3.362801 | 1458528 | GSTO1   |
| 3753.056 | -4354 | 1.40E-04 | 1628 | 0.333333 | 3.362801 | 1498136 | DGAT1   |
| 3371.16  | -4354 | 1.40E-04 | 1877 | 0.333333 | 3.362572 | 1446716 | RYR2    |
| 3336.126 | -4354 | 1.40E-04 | 1846 | 0.333333 | 3.362572 | 1412284 | COL9A1  |
| 3220.07  | -4354 | 1.40E-04 | 1846 | 0.333333 | 3.362572 | 1439612 | PLD1    |
| 3647.981 | -4354 | 1.40E-04 | 1838 | 0.333333 | 3.362572 | 1486944 | ITGA4   |
| 3763.909 | -4354 | 1.40E-04 | 2051 | 0.333333 | 3.362342 | 1503770 | GNB1    |
| 4169.87  | -4354 | 1.40E-04 | 1913 | 0.333333 | 3.362342 | 1495260 | GALC    |
| 3799.759 | -4354 | 1.40E-04 | 1879 | 0.333333 | 3.362342 | 1520696 | ZAP70   |
| 4126.67  | -4354 | 1.40E-04 | 1832 | 0.333333 | 3.362342 | 1559256 | PTTG1   |
| 3996.964 | -4354 | 1.40E-04 | 1775 | 0.333333 | 3.362342 | 1529994 | MAP4K1  |
| 3539.522 | -4354 | 1.40E-04 | 1772 | 0.333333 | 3.362342 | 1487112 | CD2     |
| 3818.514 | -4354 | 1.40E-04 | 1749 | 0.333333 | 3.362342 | 1519166 | FABP1   |
| 3842.015 | -4354 | 1.40E-04 | 1733 | 0.333333 | 3.362342 | 1530192 | MAML1   |
| 3442.051 | -4354 | 1.40E-04 | 1774 | 0.333333 | 3.362113 | 1483080 | TRIM25  |
| 3701.391 | -4354 | 1.40E-04 | 1734 | 0.333333 | 3.362113 | 1490670 | NAGPA   |
| 3265.191 | -4354 | 1.40E-04 | 1697 | 0.333333 | 3.362113 | 1451702 | CD1C    |
| 3127.685 | -4354 | 1.40E-04 | 1676 | 0.333333 | 3.362113 | 1433340 | LAMP3   |
| 3826.723 | -4354 | 1.40E-04 | 1657 | 0.333333 | 3.362113 | 1429986 | GAA     |
| 3641.922 | -4354 | 1.40E-04 | 1652 | 0.333333 | 3.362113 | 1421962 | IL17C   |
| 3126.096 | -4354 | 1.40E-04 | 1599 | 0.333333 | 3.362113 | 1413822 | PLPP1   |
| 5747.605 | -4354 | 1.40E-04 | 1891 | 0.333333 | 3.361883 | 1615050 | NDUFV2  |
| 3258.146 | -4354 | 1.40E-04 | 1847 | 0.333333 | 3.361883 | 1408470 | FRAS1   |
| 3750.857 | -4354 | 1.40E-04 | 1665 | 0.333333 | 3.361883 | 1490796 | PFKFB4  |
| 5019.524 | -4354 | 1.40E-04 | 1943 | 0.333333 | 3.361653 | 1584414 | NDUFS2  |
| 3595.439 | -4354 | 1.40E-04 | 1884 | 0.333333 | 3.361653 | 1457872 | F2R     |
| 3900.606 | -4354 | 1.40E-04 | 1749 | 0.333333 | 3.361653 | 1547636 | DEPDC5  |
| 3205.471 | -4354 | 1.40E-04 | 1699 | 0.333333 | 3.361653 | 1395412 | NTS     |
| 3266.558 | -4354 | 1.40E-04 | 1803 | 0.333333 | 3.361424 | 1460064 | APH1B   |
| 3389.308 | -4354 | 1.40E-04 | 1896 | 0.333333 | 3.361194 | 1436564 | UNC5C   |
| 4766.13  | -4354 | 1.40E-04 | 1876 | 0.333333 | 3.361194 | 1843440 | CCR6    |
| 3300.739 | -4354 | 1.40E-04 | 1847 | 0.333333 | 3.361194 | 1388476 | CYP17A1 |
| 3891.909 | -4354 | 1.40E-04 | 1800 | 0.333333 | 3.361194 | 1492338 | PPA1    |
| 3344.896 | -4354 | 1.40E-04 | 1685 | 0.333333 | 3.361194 | 1409748 | SLC27A6 |
| 3015.068 | -4354 | 1.40E-04 | 1680 | 0.333333 | 3.361194 | 1392328 | ELF4    |
| 3672.457 | -4354 | 1.40E-04 | 1951 | 0.333333 | 3.360964 | 1453536 | PLCG2   |
| 4019.929 | -4354 | 1.40E-04 | 1849 | 0.333333 | 3.360964 | 1552386 | COX10   |
| 4443.457 | -4354 | 1.40E-04 | 1792 | 0.333333 | 3.360964 | 1631368 | PERP    |
| 3241.517 | -4354 | 1.40E-04 | 1728 | 0.333333 | 3.360964 | 1378824 | APOC3   |

|          |       |          |      |          |          |         |         |
|----------|-------|----------|------|----------|----------|---------|---------|
| 3073.255 | -4354 | 1.40E-04 | 1677 | 0.333333 | 3.360964 | 1371922 | LBP     |
| 3953.742 | -4354 | 1.40E-04 | 1891 | 0.333333 | 3.360735 | 1560600 | CHEK2   |
| 3742.055 | -4354 | 1.40E-04 | 1891 | 0.333333 | 3.360735 | 1485396 | CD8A    |
| 3175.914 | -4354 | 1.40E-04 | 1765 | 0.333333 | 3.360735 | 1449008 | SLC9A1  |
| 3318.925 | -4354 | 1.40E-04 | 1727 | 0.333333 | 3.360735 | 1453448 | MYLIP   |
| 3643.404 | -4354 | 1.40E-04 | 1968 | 0.333333 | 3.360505 | 1450628 | NR3C1   |
| 3482.671 | -4354 | 1.40E-04 | 1851 | 0.333333 | 3.360505 | 1447446 | ADCY7   |
| 3371.485 | -4354 | 1.40E-04 | 1817 | 0.333333 | 3.360505 | 1404458 | ARHGDIB |
| 3284.531 | -4354 | 1.40E-04 | 1750 | 0.333333 | 3.360505 | 1471914 | CYTH3   |
| 3144.008 | -4354 | 1.40E-04 | 1678 | 0.333333 | 3.360505 | 1435280 | DOCK1   |
| 3707.97  | -4354 | 1.40E-04 | 1677 | 0.333333 | 3.360505 | 1531112 | SLC5A6  |
| 3606.787 | -4354 | 1.40E-04 | 1624 | 0.333333 | 3.360505 | 1503078 | TM7SF2  |
| 3178.999 | -4354 | 1.40E-04 | 1969 | 0.333333 | 3.360276 | 1398980 | FAS     |
| 3281.192 | -4354 | 1.40E-04 | 1919 | 0.333333 | 3.360276 | 1452090 | INSR    |
| 5224.754 | -4354 | 1.40E-04 | 1831 | 0.333333 | 3.360276 | 2032480 | PPP1R3C |
| 3816.21  | -4354 | 1.40E-04 | 1800 | 0.333333 | 3.360276 | 1521826 | TAB1    |
| 3863.494 | -4354 | 1.40E-04 | 1662 | 0.333333 | 3.360276 | 1489006 | SCAP    |
| 3215.637 | -4354 | 1.40E-04 | 1866 | 0.333333 | 3.360046 | 1423644 | TBX3    |
| 3127.827 | -4354 | 1.40E-04 | 1857 | 0.333333 | 3.360046 | 1411744 | MYLK    |
| 3088.297 | -4354 | 1.40E-04 | 1757 | 0.333333 | 3.360046 | 1430472 | BIN1    |
| 3403.727 | -4354 | 1.40E-04 | 1708 | 0.333333 | 3.360046 | 1418146 | ABCG5   |
| 3426.76  | -4354 | 1.40E-04 | 1677 | 0.333333 | 3.360046 | 1469794 | SLC44A4 |
| 3451.194 | -4354 | 1.40E-04 | 1625 | 0.333333 | 3.360046 | 1482506 | CD24    |
| 5357.011 | -4354 | 1.40E-04 | 1931 | 0.333333 | 3.359816 | 1574676 | ATP5PF  |
| 3240.094 | -4354 | 1.40E-04 | 1876 | 0.333333 | 3.359816 | 1439454 | TLN2    |
| 3177.239 | -4354 | 1.40E-04 | 1731 | 0.333333 | 3.359816 | 1425446 | CAMK1   |
| 3319.584 | -4354 | 1.40E-04 | 1659 | 0.333333 | 3.359816 | 1438906 | CLC     |
| 3529.641 | -4354 | 1.40E-04 | 1601 | 0.333333 | 3.359816 | 1477078 | EFNA3   |
| 3497.529 | -4354 | 1.40E-04 | 1876 | 0.333333 | 3.359587 | 1469264 | PPP2R3A |
| 3210.226 | -4354 | 1.40E-04 | 1796 | 0.333333 | 3.359587 | 1375362 | CCR8    |
| 3849.942 | -4354 | 1.40E-04 | 1772 | 0.333333 | 3.359587 | 1528528 | HHAT    |
| 3726.821 | -4354 | 1.40E-04 | 1727 | 0.333333 | 3.359587 | 1496854 | GCNT2   |
| 3609.889 | -4354 | 1.40E-04 | 1706 | 0.333333 | 3.359587 | 1483852 | ACSS2   |
| 4043.743 | -4354 | 1.40E-04 | 1667 | 0.333333 | 3.359587 | 1548168 | CLDN4   |
| 3277.218 | -4354 | 1.40E-04 | 1633 | 0.333333 | 3.359587 | 1395948 | SOAT2   |
| 4449.378 | -4354 | 1.40E-04 | 1977 | 0.333333 | 3.359357 | 1599808 | MDM2    |
| 3780.033 | -4354 | 1.40E-04 | 1957 | 0.333333 | 3.359357 | 1469540 | RAPGEF2 |
| 3236.476 | -4354 | 1.40E-04 | 1877 | 0.333333 | 3.359357 | 1433272 | TLE4    |
| 4205.929 | -4354 | 1.40E-04 | 1662 | 0.333333 | 3.359357 | 1511716 | MIF     |
| 2845.7   | -4354 | 1.40E-04 | 1855 | 0.333333 | 3.359127 | 1377246 | ITGA9   |
| 3649.669 | -4354 | 1.40E-04 | 1723 | 0.333333 | 3.359127 | 1465028 | CEL     |

|          |       |          |      |          |          |         |         |
|----------|-------|----------|------|----------|----------|---------|---------|
| 3430.332 | -4354 | 1.40E-04 | 1940 | 0.333333 | 3.358898 | 1441614 | PIK3CG  |
| 3928.329 | -4354 | 1.40E-04 | 1906 | 0.333333 | 3.358898 | 1472094 | PSMC1   |
| 3304.097 | -4354 | 1.40E-04 | 1654 | 0.333333 | 3.358898 | 1442572 | CD19    |
| 3788.722 | -4354 | 1.40E-04 | 1639 | 0.333333 | 3.358898 | 1426602 | TUBA8   |
| 4030.735 | -4354 | 1.40E-04 | 2262 | 0.333333 | 3.358668 | 1513624 | TP53    |
| 3149.594 | -4354 | 1.40E-04 | 1754 | 0.333333 | 3.358668 | 1409508 | WNT5B   |
| 3699.968 | -4354 | 1.40E-04 | 1677 | 0.333333 | 3.358668 | 1438742 | ADRM1   |
| 3825.917 | -4354 | 1.40E-04 | 1918 | 0.333333 | 3.358439 | 1459006 | NRAS    |
| 2913.516 | -4354 | 1.40E-04 | 1756 | 0.333333 | 3.358439 | 1309316 | CHRM5   |
| 3425.099 | -4354 | 1.40E-04 | 1727 | 0.333333 | 3.358439 | 1434916 | TXNRD1  |
| 3459.495 | -4354 | 1.40E-04 | 1664 | 0.333333 | 3.358439 | 1445366 | TLE2    |
| 3707.88  | -4354 | 1.40E-04 | 1645 | 0.333333 | 3.358439 | 1475938 | SLC17A5 |
| 4208.238 | -4354 | 1.40E-04 | 1907 | 0.333333 | 3.358209 | 1486644 | RASA1   |
| 3243.824 | -4354 | 1.40E-04 | 1889 | 0.333333 | 3.358209 | 1425896 | EPHB1   |
| 3149.631 | -4354 | 1.40E-04 | 1768 | 0.333333 | 3.358209 | 1405550 | SOCS2   |
| 4125.186 | -4354 | 1.40E-04 | 1996 | 0.333333 | 3.357979 | 1523630 | CAMK2D  |
| 3397.845 | -4354 | 1.40E-04 | 1911 | 0.333333 | 3.357979 | 1427012 | FOXG1   |
| 3298.913 | -4354 | 1.40E-04 | 1857 | 0.333333 | 3.357979 | 1419242 | IL1RAP  |
| 3250.859 | -4354 | 1.40E-04 | 1813 | 0.333333 | 3.357979 | 1423014 | NLGN4X  |
| 3043.871 | -4354 | 1.40E-04 | 1766 | 0.333333 | 3.357979 | 1379358 | GNG11   |
| 3928.725 | -4354 | 1.40E-04 | 1704 | 0.333333 | 3.357979 | 1515412 | ATG4A   |
| 3694.843 | -4354 | 1.40E-04 | 1670 | 0.333333 | 3.357979 | 1503146 | IRAK4   |
| 3224.646 | -4354 | 1.40E-04 | 1745 | 0.333333 | 3.35775  | 1382738 | ARAP3   |
| 3469.657 | -4354 | 1.40E-04 | 1624 | 0.333333 | 3.35775  | 1429674 | PLA2G15 |
| 2854.455 | -4354 | 1.40E-04 | 1654 | 0.333333 | 3.35752  | 1315844 | INSRR   |
| 2942.223 | -4354 | 1.40E-04 | 1635 | 0.333333 | 3.35752  | 1320316 | FGF21   |
| 3604.286 | -4354 | 1.40E-04 | 2167 | 0.333333 | 3.35729  | 1452114 | YWHAZ   |
| 3228.707 | -4354 | 1.40E-04 | 1886 | 0.333333 | 3.35729  | 1389424 | LAMA1   |
| 3641.11  | -4354 | 1.40E-04 | 1873 | 0.333333 | 3.35729  | 1464468 | MAP3K1  |
| 3007.118 | -4354 | 1.40E-04 | 1706 | 0.333333 | 3.35729  | 1358506 | SEMA3E  |
| 3405.674 | -4354 | 1.40E-04 | 1671 | 0.333333 | 3.35729  | 1443510 | TEAD4   |
| 3098.401 | -4354 | 1.40E-04 | 1657 | 0.333333 | 3.35729  | 1399544 | RRAGD   |
| 3441.576 | -4354 | 1.40E-04 | 1604 | 0.333333 | 3.35729  | 1415874 | M6PR    |
| 3114.756 | -4354 | 1.40E-04 | 1585 | 0.333333 | 3.35729  | 1346302 | ANGPTL8 |
| 3757.651 | -4354 | 1.40E-04 | 1935 | 0.333333 | 3.357061 | 1467526 | CDKN1B  |
| 3165.995 | -4354 | 1.40E-04 | 1870 | 0.333333 | 3.357061 | 1372648 | EYA1    |
| 3235.572 | -4354 | 1.40E-04 | 1855 | 0.333333 | 3.357061 | 1450792 | PIK3R3  |
| 3094.876 | -4354 | 1.40E-04 | 1784 | 0.333333 | 3.357061 | 1379148 | IGF2R   |
| 4304.493 | -4354 | 1.40E-04 | 1744 | 0.333333 | 3.357061 | 1551632 | DROSHA  |
| 3584.018 | -4354 | 1.40E-04 | 1717 | 0.333333 | 3.357061 | 1480756 | P2RX5   |
| 3535.359 | -4354 | 1.40E-04 | 1671 | 0.333333 | 3.357061 | 1427956 | PMP2    |

|          |       |          |      |          |          |         |           |
|----------|-------|----------|------|----------|----------|---------|-----------|
| 2757.643 | -4354 | 1.40E-04 | 1618 | 0.333333 | 3.357061 | 1359240 | PTGES     |
| 3893.943 | -4354 | 1.40E-04 | 1704 | 0.333333 | 3.356831 | 1519490 | DVL1      |
| 3416.915 | -4354 | 1.40E-04 | 1688 | 0.333333 | 3.356831 | 1452394 | SESN1     |
| 3234.6   | -4354 | 1.40E-04 | 1696 | 0.333333 | 3.356602 | 1350858 | CYP2C19   |
| 4904.218 | -4354 | 1.40E-04 | 1939 | 0.333333 | 3.356372 | 1577930 | NDUFA9    |
| 3611.417 | -4354 | 1.40E-04 | 1896 | 0.333333 | 3.356372 | 1415584 | CACNA1E   |
| 3530.595 | -4354 | 1.40E-04 | 1780 | 0.333333 | 3.356372 | 1438212 | PTPRR     |
| 3058.004 | -4354 | 1.40E-04 | 1755 | 0.333333 | 3.356372 | 1359256 | IBSP      |
| 5318.954 | -4354 | 1.40E-04 | 1696 | 0.333333 | 3.356372 | 1945672 | ATG14     |
| 4262.656 | -4354 | 1.40E-04 | 1929 | 0.333333 | 3.356142 | 1553776 | NR2C2     |
| 3052.776 | -4354 | 1.40E-04 | 1902 | 0.333333 | 3.356142 | 1361378 | FOS       |
| 3457.077 | -4354 | 1.40E-04 | 1748 | 0.333333 | 3.356142 | 1424366 | SLC22A3   |
| 3361.584 | -4354 | 1.40E-04 | 1665 | 0.333333 | 3.356142 | 1396052 | NCEH1     |
| 3500.888 | -4354 | 1.40E-04 | 1651 | 0.333333 | 3.355913 | 1473518 | MACROH2A2 |
| 3039.762 | -4354 | 1.40E-04 | 1622 | 0.333333 | 3.355913 | 1371644 | SPRR1B    |
| 2986.902 | -4354 | 1.40E-04 | 1807 | 0.333333 | 3.355683 | 1354070 | CD59      |
| 2896.035 | -4354 | 1.40E-04 | 1759 | 0.333333 | 3.355683 | 1327312 | AOX1      |
| 3348.775 | -4354 | 1.40E-04 | 1960 | 0.333333 | 3.355454 | 1394018 | CHRM3     |
| 3539.53  | -4354 | 1.40E-04 | 1917 | 0.333333 | 3.355454 | 1454984 | NEDD4L    |
| 3721.107 | -4354 | 1.40E-04 | 1706 | 0.333333 | 3.355454 | 1455268 | DBI       |
| 3014.682 | -4354 | 1.40E-04 | 1640 | 0.333333 | 3.355454 | 1319802 | CACNA1H   |
| 3117.712 | -4354 | 1.40E-04 | 1622 | 0.333333 | 3.355454 | 1360002 | TRPV2     |
| 3683.372 | -4354 | 1.40E-04 | 1975 | 0.333333 | 3.355224 | 1417702 | ACTR3     |
| 2834.328 | -4354 | 1.40E-04 | 1924 | 0.333333 | 3.355224 | 1353000 | EPAS1     |
| 3532.092 | -4354 | 1.40E-04 | 1879 | 0.333333 | 3.355224 | 1448606 | PIP5K1B   |
| 3728.811 | -4354 | 1.40E-04 | 1760 | 0.333333 | 3.355224 | 1488690 | FABP4     |
| 3827.099 | -4354 | 1.40E-04 | 1692 | 0.333333 | 3.355224 | 1488512 | FABP6     |
| 3184.565 | -4354 | 1.40E-04 | 1851 | 0.333333 | 3.354994 | 1369934 | CDON      |
| 4562.848 | -4354 | 1.40E-04 | 1826 | 0.333333 | 3.354994 | 1515666 | ESR2      |
| 2858.546 | -4354 | 1.40E-04 | 1795 | 0.333333 | 3.354994 | 1335628 | NOTCH2    |
| 3031.25  | -4354 | 1.40E-04 | 1944 | 0.333333 | 3.354765 | 1360368 | PDGFRA    |
| 3336.758 | -4354 | 1.40E-04 | 1773 | 0.333333 | 3.354765 | 1442402 | NEO1      |
| 2700.902 | -4354 | 1.40E-04 | 1739 | 0.333333 | 3.354765 | 1309446 | IL13RA1   |
| 2914.529 | -4354 | 1.40E-04 | 1722 | 0.333333 | 3.354765 | 1338400 | LUM       |
| 2988.721 | -4354 | 1.40E-04 | 1941 | 0.333333 | 3.354535 | 1394874 | SMAD3     |
| 4311.84  | -4354 | 1.40E-04 | 1842 | 0.333333 | 3.354535 | 1534082 | ORC1      |
| 3060.843 | -4354 | 1.40E-04 | 1738 | 0.333333 | 3.354535 | 1346938 | IL1B      |
| 3188.994 | -4354 | 1.40E-04 | 1744 | 0.333333 | 3.354305 | 1415066 | CBS       |
| 3380.823 | -4354 | 1.40E-04 | 1728 | 0.333333 | 3.354305 | 1375182 | PDCD1LG2  |
| 3162.061 | -4354 | 1.40E-04 | 1589 | 0.333333 | 3.354305 | 1371008 | TFEB      |
| 3164.116 | -4354 | 1.40E-04 | 1826 | 0.333333 | 3.354076 | 1418834 | TLE1      |



|          |       |          |      |          |          |         |          |
|----------|-------|----------|------|----------|----------|---------|----------|
| 2867.216 | -4354 | 1.40E-04 | 1774 | 0.333333 | 3.354076 | 1336706 | DOCK4    |
| 3222.922 | -4354 | 1.40E-04 | 1659 | 0.333333 | 3.354076 | 1367014 | SELPLG   |
| 2873.916 | -4354 | 1.40E-04 | 1587 | 0.333333 | 3.354076 | 1334222 | WIPI1    |
| 3309.676 | -4354 | 1.40E-04 | 1794 | 0.333333 | 3.353846 | 1384086 | GRK2     |
| 3831.132 | -4354 | 1.40E-04 | 1762 | 0.333333 | 3.353846 | 1443540 | MAP4K3   |
| 3292.417 | -4354 | 1.40E-04 | 1655 | 0.333333 | 3.353846 | 1413846 | NQO1     |
| 3245.225 | -4354 | 1.40E-04 | 1648 | 0.333333 | 3.353846 | 1377002 | CUBN     |
| 3005.12  | -4354 | 1.40E-04 | 1862 | 0.333333 | 3.353617 | 1350644 | LAMA3    |
| 3207.467 | -4354 | 1.40E-04 | 1788 | 0.333333 | 3.353617 | 1405488 | SCARB1   |
| 3480.972 | -4354 | 1.40E-04 | 1667 | 0.333333 | 3.353617 | 1406936 | BAK1     |
| 3418.214 | -4354 | 1.40E-04 | 2168 | 0.333333 | 3.353387 | 1400834 | SRC      |
| 3012.006 | -4354 | 1.40E-04 | 1858 | 0.333333 | 3.353387 | 1379468 | EPHB2    |
| 3579.241 | -4354 | 1.40E-04 | 1834 | 0.333333 | 3.353387 | 1422694 | TAOK3    |
| 3587.069 | -4354 | 1.40E-04 | 1768 | 0.333333 | 3.353387 | 1389694 | TBK1     |
| 3254.383 | -4354 | 1.40E-04 | 1630 | 0.333333 | 3.353387 | 1403106 | THBS3    |
| 2937.796 | -4354 | 1.40E-04 | 1771 | 0.333333 | 3.353157 | 1335970 | CAPN2    |
| 3184.179 | -4354 | 1.40E-04 | 1919 | 0.333333 | 3.352928 | 1362476 | SERPINA1 |
| 3002.02  | -4354 | 1.40E-04 | 1913 | 0.333333 | 3.352928 | 1358452 | CTNNA1   |
| 3294.715 | -4354 | 1.40E-04 | 1805 | 0.333333 | 3.352928 | 1390222 | SLC8A1   |
| 3999.792 | -4354 | 1.40E-04 | 1653 | 0.333333 | 3.352928 | 1459686 | FABP2    |
| 3521.984 | -4354 | 1.40E-04 | 1616 | 0.333333 | 3.352928 | 1325456 | TLX3     |
| 3422.948 | -4354 | 1.40E-04 | 1587 | 0.333333 | 3.352928 | 1380094 | PNPLA2   |
| 3046.649 | -4354 | 1.40E-04 | 1570 | 0.333333 | 3.352928 | 1332670 | POU5F1B  |
| 3509.906 | -4354 | 1.39E-04 | 1886 | 0.333333 | 3.352698 | 1403834 | RAF1     |
| 3161.746 | -4354 | 1.39E-04 | 1676 | 0.333333 | 3.352698 | 1340462 | LTB4R2   |
| 2954.449 | -4354 | 1.39E-04 | 1860 | 0.333333 | 3.352468 | 1301774 | CCR1     |
| 3250.83  | -4354 | 1.39E-04 | 1834 | 0.333333 | 3.352468 | 1419140 | ME3      |
| 3339.975 | -4354 | 1.39E-04 | 1724 | 0.333333 | 3.352468 | 1405062 | RHOD     |
| 2871.405 | -4354 | 1.39E-04 | 1701 | 0.333333 | 3.352468 | 1288378 | ICAM1    |
| 3279.033 | -4354 | 1.39E-04 | 1670 | 0.333333 | 3.352468 | 1340890 | CAB39    |
| 3239.545 | -4354 | 1.39E-04 | 1656 | 0.333333 | 3.352468 | 1298400 | POU3F4   |
| 3147.572 | -4354 | 1.39E-04 | 1770 | 0.333333 | 3.352239 | 1367300 | ITGAL    |
| 3544.438 | -4354 | 1.39E-04 | 1729 | 0.333333 | 3.352239 | 1420504 | XBP1     |
| 2902.91  | -4354 | 1.39E-04 | 1750 | 0.333333 | 3.352009 | 1349226 | ATP2B4   |
| 3930.001 | -4354 | 1.39E-04 | 1724 | 0.333333 | 3.352009 | 1356398 | SI       |
| 3678.914 | -4354 | 1.39E-04 | 1723 | 0.333333 | 3.352009 | 1418268 | GSTA4    |
| 3011.917 | -4354 | 1.39E-04 | 1699 | 0.333333 | 3.352009 | 1354248 | UNC5B    |
| 3517.304 | -4354 | 1.39E-04 | 1615 | 0.333333 | 3.352009 | 1412348 | PRCC     |
| 2953.747 | -4354 | 1.39E-04 | 1804 | 0.333333 | 3.35178  | 1358010 | FZD1     |
| 3162.139 | -4354 | 1.39E-04 | 1788 | 0.333333 | 3.35178  | 1368608 | ARG1     |
| 2762.407 | -4354 | 1.39E-04 | 1738 | 0.333333 | 3.35178  | 1291230 | PTGIR    |

|          |       |          |      |          |          |         |          |
|----------|-------|----------|------|----------|----------|---------|----------|
| 3122.595 | -4354 | 1.39E-04 | 1674 | 0.333333 | 3.35178  | 1340224 | ITGA7    |
| 3106.327 | -4354 | 1.39E-04 | 1612 | 0.333333 | 3.35178  | 1338890 | IL36RN   |
| 3202.079 | -4354 | 1.39E-04 | 1600 | 0.333333 | 3.35178  | 1350990 | NRBF2    |
| 3318.643 | -4354 | 1.39E-04 | 1585 | 0.333333 | 3.35178  | 1413702 | HILPDA   |
| 2894.243 | -4354 | 1.39E-04 | 1824 | 0.333333 | 3.35155  | 1286392 | CCKBR    |
| 3014.858 | -4354 | 1.39E-04 | 1802 | 0.333333 | 3.35155  | 1330354 | KCNJ6    |
| 3923.077 | -4354 | 1.39E-04 | 1778 | 0.333333 | 3.35155  | 1426928 | MSH2     |
| 3831.459 | -4354 | 1.39E-04 | 1623 | 0.333333 | 3.35155  | 1443178 | UBE2S    |
| 3889.745 | -4354 | 1.39E-04 | 1874 | 0.333333 | 3.35132  | 1418532 | CHUK     |
| 2815.572 | -4354 | 1.39E-04 | 1731 | 0.333333 | 3.35132  | 1308404 | SERPINB1 |
| 3206.765 | -4354 | 1.39E-04 | 1683 | 0.333333 | 3.35132  | 1326848 | SLC2A3   |
| 3553.981 | -4354 | 1.39E-04 | 2044 | 0.333333 | 3.351091 | 1404806 | YWHAB    |
| 2637.29  | -4354 | 1.39E-04 | 1788 | 0.333333 | 3.351091 | 1265634 | IL1R1    |
| 2747.97  | -4354 | 1.39E-04 | 1770 | 0.333333 | 3.351091 | 1289886 | PECAM1   |
| 2903.247 | -4354 | 1.39E-04 | 1730 | 0.333333 | 3.351091 | 1311398 | MAOB     |
| 2937.05  | -4354 | 1.39E-04 | 1625 | 0.333333 | 3.351091 | 1342906 | CD200    |
| 3524.741 | -4354 | 1.39E-04 | 1826 | 0.333333 | 3.350861 | 1435054 | FARP2    |
| 2884.626 | -4354 | 1.39E-04 | 1761 | 0.333333 | 3.350861 | 1326350 | HGF      |
| 3550.459 | -4354 | 1.39E-04 | 1708 | 0.333333 | 3.350861 | 1374750 | PRICKLE2 |
| 3258.681 | -4354 | 1.39E-04 | 1814 | 0.333333 | 3.350631 | 1394356 | ITPR2    |
| 3308.293 | -4354 | 1.39E-04 | 1792 | 0.333333 | 3.350631 | 1380846 | GRK3     |
| 3020.509 | -4354 | 1.39E-04 | 1782 | 0.333333 | 3.350631 | 1303298 | CASP1    |
| 3070.933 | -4354 | 1.39E-04 | 1742 | 0.333333 | 3.350631 | 1372962 | PFKP     |
| 3574.875 | -4354 | 1.39E-04 | 1692 | 0.333333 | 3.350631 | 1399656 | RIPK3    |
| 3151.37  | -4354 | 1.39E-04 | 1616 | 0.333333 | 3.350631 | 1266774 | WNT8B    |
| 3786.472 | -4354 | 1.39E-04 | 1892 | 0.333333 | 3.350402 | 1402272 | PSMC5    |
| 2838.127 | -4354 | 1.39E-04 | 1864 | 0.333333 | 3.350402 | 1329492 | FOXO1    |
| 2932.921 | -4354 | 1.39E-04 | 1849 | 0.333333 | 3.350402 | 1330774 | ROR1     |
| 2935.974 | -4354 | 1.39E-04 | 1765 | 0.333333 | 3.350402 | 1307592 | SCTR     |
| 2939.018 | -4354 | 1.39E-04 | 1735 | 0.333333 | 3.350402 | 1324078 | EPHA7    |
| 3696.903 | -4354 | 1.39E-04 | 1618 | 0.333333 | 3.350402 | 1422626 | MEN1     |
| 3319.274 | -4354 | 1.39E-04 | 1840 | 0.333333 | 3.350172 | 1408378 | PTPN1    |
| 3806.216 | -4354 | 1.39E-04 | 1805 | 0.333333 | 3.350172 | 1425956 | MCM3     |
| 2716.239 | -4354 | 1.39E-04 | 1609 | 0.333333 | 3.350172 | 1282148 | TNFAIP6  |
| 3427.297 | -4354 | 1.39E-04 | 1601 | 0.333333 | 3.350172 | 1391842 | SLC4A2   |
| 3157.952 | -4354 | 1.39E-04 | 1713 | 0.333333 | 3.349943 | 1336794 | MYL2     |
| 3140.835 | -4354 | 1.39E-04 | 1616 | 0.333333 | 3.349943 | 1369984 | TICAM1   |
| 6055.105 | -4354 | 1.39E-04 | 1602 | 0.333333 | 3.349943 | 2486938 | EIF4EBP1 |
| 4014.938 | -4354 | 1.39E-04 | 1756 | 0.333333 | 3.349713 | 1495386 | TSC1     |
| 3559.705 | -4354 | 1.39E-04 | 1733 | 0.333333 | 3.349713 | 1392974 | HSD17B4  |
| 3621.324 | -4354 | 1.39E-04 | 1576 | 0.333333 | 3.349713 | 1432968 | TSPOAP1  |

|          |       |          |      |          |          |         |         |
|----------|-------|----------|------|----------|----------|---------|---------|
| 3809.253 | -4354 | 1.39E-04 | 1923 | 0.333333 | 3.349483 | 1392452 | PSMC3   |
| 2929.434 | -4354 | 1.39E-04 | 1810 | 0.333333 | 3.349483 | 1306250 | NFKBIA  |
| 3431.373 | -4354 | 1.39E-04 | 1733 | 0.333333 | 3.349483 | 1370720 | SIX1    |
| 3339.197 | -4354 | 1.39E-04 | 1687 | 0.333333 | 3.349483 | 1352334 | MAP3K11 |
| 3296.975 | -4354 | 1.39E-04 | 1622 | 0.333333 | 3.349483 | 1355544 | INHBE   |
| 3179.95  | -4354 | 1.39E-04 | 2005 | 0.333333 | 3.349254 | 1319602 | RHOA    |
| 3187.07  | -4354 | 1.39E-04 | 1908 | 0.333333 | 3.349254 | 1396744 | LEF1    |
| 2833.091 | -4354 | 1.39E-04 | 1813 | 0.333333 | 3.349254 | 1308076 | INHBA   |
| 2824.633 | -4354 | 1.39E-04 | 1766 | 0.333333 | 3.349254 | 1306142 | LPAR3   |
| 2880.009 | -4354 | 1.39E-04 | 1707 | 0.333333 | 3.349254 | 1298644 | ENG     |
| 3263.422 | -4354 | 1.39E-04 | 1789 | 0.333333 | 3.349024 | 1351872 | SLC4A4  |
| 3565.387 | -4354 | 1.39E-04 | 1741 | 0.333333 | 3.349024 | 1434804 | MGMT    |
| 3161.022 | -4354 | 1.39E-04 | 1673 | 0.333333 | 3.349024 | 1348826 | GPC1    |
| 3215.512 | -4354 | 1.39E-04 | 1631 | 0.333333 | 3.349024 | 1364398 | MYL4    |
| 8739.427 | -4354 | 1.39E-04 | 1625 | 0.333333 | 3.349024 | 3760708 | DEFA6   |
| 3089.328 | -4354 | 1.39E-04 | 1893 | 0.333333 | 3.348794 | 1354790 | RET     |
| 3587.425 | -4354 | 1.39E-04 | 1770 | 0.333333 | 3.348794 | 1376524 | SEC13   |
| 3321.703 | -4354 | 1.39E-04 | 1756 | 0.333333 | 3.348794 | 1358440 | CYP39A1 |
| 3224.69  | -4354 | 1.39E-04 | 1728 | 0.333333 | 3.348794 | 1368706 | SMPD1   |
| 3080.16  | -4354 | 1.39E-04 | 1587 | 0.333333 | 3.348794 | 1328428 | IFITM1  |
| 3079.124 | -4354 | 1.39E-04 | 1951 | 0.333333 | 3.348565 | 1362076 | TPM1    |
| 3956.47  | -4354 | 1.39E-04 | 1940 | 0.333333 | 3.348565 | 1432548 | TBL1XR1 |
| 3109.18  | -4354 | 1.39E-04 | 1870 | 0.333333 | 3.348565 | 1363970 | STAT5B  |
| 3468.132 | -4354 | 1.39E-04 | 1696 | 0.333333 | 3.348565 | 1416262 | PDK1    |
| 3481.779 | -4354 | 1.39E-04 | 1653 | 0.333333 | 3.348565 | 1347180 | RPS6KA4 |
| 3123.545 | -4354 | 1.39E-04 | 1650 | 0.333333 | 3.348565 | 1290420 | GNG13   |
| 3400.142 | -4354 | 1.39E-04 | 1621 | 0.333333 | 3.348565 | 1331322 | FUCA1   |
| 3388.479 | -4354 | 1.39E-04 | 1896 | 0.333333 | 3.348335 | 1352776 | MAPK10  |
| 3006.724 | -4354 | 1.39E-04 | 1757 | 0.333333 | 3.348335 | 1307324 | TNFSF10 |
| 2741.36  | -4354 | 1.39E-04 | 1709 | 0.333333 | 3.348335 | 1273892 | ADAMTS5 |
| 2894.386 | -4354 | 1.39E-04 | 1693 | 0.333333 | 3.348335 | 1307972 | OPTN    |
| 3031.544 | -4354 | 1.39E-04 | 1706 | 0.333333 | 3.348106 | 1300552 | CYSLTR2 |
| 2486.591 | -4354 | 1.39E-04 | 1689 | 0.333333 | 3.348106 | 1242506 | THBD    |
| 3238.725 | -4354 | 1.39E-04 | 1636 | 0.333333 | 3.348106 | 1338830 | SCO2    |
| 2919.875 | -4354 | 1.39E-04 | 1577 | 0.333333 | 3.348106 | 1298140 | TNFSF14 |
| 2641.975 | -4354 | 1.39E-04 | 1812 | 0.333333 | 3.347876 | 1261938 | CD44    |
| 3478.779 | -4354 | 1.39E-04 | 1712 | 0.333333 | 3.347876 | 1412362 | HOMER1  |
| 3224.41  | -4354 | 1.39E-04 | 1647 | 0.333333 | 3.347876 | 1346546 | NAPA    |
| 3134.435 | -4354 | 1.39E-04 | 1645 | 0.333333 | 3.347876 | 1290418 | MYF5    |
| 2958.737 | -4354 | 1.39E-04 | 1698 | 0.333333 | 3.347646 | 1287664 | HSD3B1  |
| 3671.093 | -4354 | 1.39E-04 | 1684 | 0.333333 | 3.347646 | 1370214 | GSTT2   |

|          |       |          |      |          |          |         |          |
|----------|-------|----------|------|----------|----------|---------|----------|
| 2897.426 | -4354 | 1.39E-04 | 1607 | 0.333333 | 3.347646 | 1321470 | TGIF1    |
| 3661.39  | -4354 | 1.39E-04 | 1527 | 0.333333 | 3.347646 | 1400542 | CRB3     |
| 3311.422 | -4354 | 1.39E-04 | 1855 | 0.333333 | 3.347417 | 1338120 | ANK2     |
| 3680.891 | -4354 | 1.39E-04 | 1759 | 0.333333 | 3.347417 | 1385142 | POU4F1   |
| 3634.487 | -4354 | 1.39E-04 | 1751 | 0.333333 | 3.347417 | 1384020 | KAT5     |
| 3140.511 | -4354 | 1.39E-04 | 1645 | 0.333333 | 3.347417 | 1342392 | RASSF1   |
| 3957.58  | -4354 | 1.39E-04 | 1591 | 0.333333 | 3.347417 | 1466922 | SCRIB    |
| 3030.791 | -4354 | 1.39E-04 | 1675 | 0.333333 | 3.347187 | 1274298 | LIPF     |
| 2986.556 | -4354 | 1.39E-04 | 1639 | 0.333333 | 3.347187 | 1321244 | ALOX15   |
| 3054.078 | -4354 | 1.39E-04 | 1619 | 0.333333 | 3.347187 | 1334576 | PMAIP1   |
| 2842.716 | -4354 | 1.39E-04 | 1597 | 0.333333 | 3.347187 | 1330958 | IL17RB   |
| 3759.808 | -4354 | 1.39E-04 | 1826 | 0.333333 | 3.346958 | 1429300 | MAP3K4   |
| 3200.055 | -4354 | 1.39E-04 | 1612 | 0.333333 | 3.346958 | 1315112 | CSH1     |
| 2800.794 | -4354 | 1.39E-04 | 1902 | 0.333333 | 3.346728 | 1280610 | DCN      |
| 2813.079 | -4354 | 1.39E-04 | 1785 | 0.333333 | 3.346728 | 1288564 | AXL      |
| 3283.764 | -4354 | 1.39E-04 | 1726 | 0.333333 | 3.346728 | 1378178 | ABCC4    |
| 3087.093 | -4354 | 1.39E-04 | 1719 | 0.333333 | 3.346728 | 1353088 | ALDH3A2  |
| 3333.026 | -4354 | 1.39E-04 | 1664 | 0.333333 | 3.346728 | 1365942 | PI4KA    |
| 3973.17  | -4354 | 1.39E-04 | 1658 | 0.333333 | 3.346728 | 1346206 | ACADL    |
| 3008.945 | -4354 | 1.39E-04 | 1607 | 0.333333 | 3.346728 | 1354088 | PDE3B    |
| 3185.569 | -4354 | 1.39E-04 | 1586 | 0.333333 | 3.346728 | 1274564 | IFNA2    |
| 3258.202 | -4354 | 1.39E-04 | 1726 | 0.333333 | 3.346498 | 1360006 | DNER     |
| 2796.856 | -4354 | 1.39E-04 | 1558 | 0.333333 | 3.346498 | 1231022 | DKK4     |
| 3300.365 | -4354 | 1.39E-04 | 1788 | 0.333333 | 3.346039 | 1302176 | APOH     |
| 3306.762 | -4354 | 1.39E-04 | 1734 | 0.333333 | 3.346039 | 1370390 | SLC44A1  |
| 3048.698 | -4354 | 1.39E-04 | 1608 | 0.333333 | 3.346039 | 1314016 | PPP1R15A |
| 3686.095 | -4354 | 1.39E-04 | 1568 | 0.333333 | 3.346039 | 1411406 | RPIA     |
| 3322.866 | -4354 | 1.39E-04 | 1791 | 0.333333 | 3.345809 | 1343218 | RAP1A    |
| 2709.434 | -4354 | 1.39E-04 | 1538 | 0.333333 | 3.345809 | 1264332 | CD99     |
| 3222.157 | -4354 | 1.39E-04 | 1836 | 0.333333 | 3.34558  | 1360540 | IFNAR1   |
| 3235.691 | -4354 | 1.39E-04 | 1753 | 0.333333 | 3.34558  | 1326632 | CAPN1    |
| 3546.97  | -4354 | 1.39E-04 | 1679 | 0.333333 | 3.34558  | 1400678 | PF4V1    |
| 3024.24  | -4354 | 1.39E-04 | 1753 | 0.333333 | 3.34535  | 1321772 | EZR      |
| 3001.311 | -4354 | 1.39E-04 | 1551 | 0.333333 | 3.34535  | 1304700 | MCOLN1   |
| 3306.069 | -4354 | 1.39E-04 | 1714 | 0.333333 | 3.345121 | 1364116 | EML4     |
| 2973.494 | -4354 | 1.39E-04 | 1846 | 0.333333 | 3.344891 | 1292164 | ALOX5    |
| 3298.228 | -4354 | 1.39E-04 | 1697 | 0.333333 | 3.344891 | 1360732 | LMNB1    |
| 3499.665 | -4354 | 1.39E-04 | 1687 | 0.333333 | 3.344891 | 1323874 | TUBB4B   |
| 3356.415 | -4354 | 1.39E-04 | 1826 | 0.333333 | 3.344661 | 1350186 | MAPKAP1  |
| 3090.083 | -4354 | 1.39E-04 | 1743 | 0.333333 | 3.344661 | 1338896 | VAV3     |
| 2805.77  | -4354 | 1.39E-04 | 1616 | 0.333333 | 3.344661 | 1268072 | KLF2     |

|          |       |          |      |          |          |         |          |
|----------|-------|----------|------|----------|----------|---------|----------|
| 2825.445 | -4354 | 1.39E-04 | 1798 | 0.333333 | 3.344432 | 1273084 | TGFB2    |
| 2998.882 | -4354 | 1.39E-04 | 1691 | 0.333333 | 3.344432 | 1333242 | PTPN7    |
| 3424.84  | -4354 | 1.39E-04 | 1860 | 0.333333 | 3.344202 | 1337340 | ITSN1    |
| 3102.589 | -4354 | 1.39E-04 | 1860 | 0.333333 | 3.344202 | 1292696 | PXN      |
| 2834.989 | -4354 | 1.39E-04 | 1690 | 0.333333 | 3.344202 | 1281004 | TIE1     |
| 2939.099 | -4354 | 1.39E-04 | 1678 | 0.333333 | 3.344202 | 1302984 | CALCOCO2 |
| 2908.722 | -4354 | 1.39E-04 | 1739 | 0.333333 | 3.343972 | 1333778 | ABL2     |
| 2713.593 | -4354 | 1.39E-04 | 1684 | 0.333333 | 3.343972 | 1211190 | F2RL3    |
| 3322.276 | -4354 | 1.39E-04 | 1673 | 0.333333 | 3.343972 | 1344834 | ATF4     |
| 2788.149 | -4354 | 1.39E-04 | 1667 | 0.333333 | 3.343972 | 1267666 | TBXAS1   |
| 3456.702 | -4354 | 1.39E-04 | 1632 | 0.333333 | 3.343972 | 1341488 | GLO1     |
| 3079.896 | -4354 | 1.39E-04 | 1587 | 0.333333 | 3.343972 | 1313726 | LRRC25   |
| 2918.846 | -4354 | 1.39E-04 | 1714 | 0.333333 | 3.343743 | 1315786 | PTPRJ    |
| 3551.466 | -4354 | 1.39E-04 | 1599 | 0.333333 | 3.343513 | 1376210 | MST1     |
| 3356.501 | -4354 | 1.39E-04 | 1520 | 0.333333 | 3.343513 | 1298962 | PLA2G4F  |
| 3102.653 | -4354 | 1.39E-04 | 1795 | 0.333333 | 3.343284 | 1316834 | RIPK1    |
| 2991.921 | -4354 | 1.39E-04 | 1774 | 0.333333 | 3.343284 | 1309636 | TLR3     |
| 2981.491 | -4354 | 1.39E-04 | 1765 | 0.333333 | 3.343284 | 1335370 | ANK1     |
| 2702.295 | -4354 | 1.39E-04 | 1736 | 0.333333 | 3.343284 | 1267436 | COL4A5   |
| 3312.279 | -4354 | 1.39E-04 | 1734 | 0.333333 | 3.343284 | 1281150 | APOA1    |
| 3910.81  | -4354 | 1.39E-04 | 1707 | 0.333333 | 3.343284 | 1434956 | MMACHC   |
| 2985.479 | -4354 | 1.39E-04 | 1690 | 0.333333 | 3.343284 | 1243422 | GUCY2F   |
| 2660.171 | -4354 | 1.39E-04 | 1661 | 0.333333 | 3.343284 | 1238148 | MMP13    |
| 2880.57  | -4354 | 1.39E-04 | 1609 | 0.333333 | 3.343284 | 1293402 | ROBO3    |
| 3025.639 | -4354 | 1.39E-04 | 1839 | 0.333333 | 3.343054 | 1317908 | PIK3CD   |
| 3303.684 | -4354 | 1.39E-04 | 2056 | 0.333333 | 3.342824 | 1366934 | SOS1     |
| 2800.367 | -4354 | 1.39E-04 | 1760 | 0.333333 | 3.342824 | 1279204 | TLN1     |
| 3321.786 | -4354 | 1.39E-04 | 1647 | 0.333333 | 3.342824 | 1306280 | CD69     |
| 2807.492 | -4354 | 1.39E-04 | 1784 | 0.333333 | 3.342595 | 1251572 | ITGAM    |
| 2821.632 | -4354 | 1.39E-04 | 1692 | 0.333333 | 3.342595 | 1295142 | TRAF1    |
| 3000.613 | -4354 | 1.39E-04 | 1652 | 0.333333 | 3.342595 | 1284552 | MYL12A   |
| 3177.547 | -4354 | 1.39E-04 | 1519 | 0.333333 | 3.342595 | 1237218 | PGK2     |
| 3675.819 | -4354 | 1.39E-04 | 1904 | 0.333333 | 3.342365 | 1354052 | PLCG1    |
| 3130.193 | -4354 | 1.39E-04 | 1724 | 0.333333 | 3.342365 | 1306118 | CXCL2    |
| 3634.883 | -4354 | 1.39E-04 | 1695 | 0.333333 | 3.342365 | 1377516 | NUMB     |
| 4243.064 | -4354 | 1.39E-04 | 1792 | 0.333333 | 3.342135 | 1410030 | HADH     |
| 2778.956 | -4354 | 1.39E-04 | 1628 | 0.333333 | 3.342135 | 1267642 | LTBR     |
| 2510.624 | -4354 | 1.39E-04 | 1721 | 0.333333 | 3.341906 | 1208996 | ENTPD1   |
| 2851.017 | -4354 | 1.39E-04 | 1692 | 0.333333 | 3.341906 | 1301412 | ETS1     |
| 3027.695 | -4354 | 1.39E-04 | 1688 | 0.333333 | 3.341676 | 1328528 | SSBP3    |
| 2946.58  | -4354 | 1.39E-04 | 1663 | 0.333333 | 3.341676 | 1309112 | ST3GAL4  |

|          |       |          |      |          |          |         |           |
|----------|-------|----------|------|----------|----------|---------|-----------|
| 3958.357 | -4354 | 1.39E-04 | 1874 | 0.333333 | 3.341447 | 1389050 | MCM2      |
| 2974.69  | -4354 | 1.39E-04 | 1777 | 0.333333 | 3.341447 | 1272472 | CD40      |
| 2929.498 | -4354 | 1.39E-04 | 1733 | 0.333333 | 3.341447 | 1307728 | MYO10     |
| 3465.502 | -4354 | 1.39E-04 | 1728 | 0.333333 | 3.341447 | 1335452 | CCNH      |
| 3478.919 | -4354 | 1.39E-04 | 1629 | 0.333333 | 3.341447 | 1365586 | IGBP1     |
| 2703.212 | -4354 | 1.39E-04 | 1629 | 0.333333 | 3.341447 | 1227914 | BDNF      |
| 2617.697 | -4354 | 1.39E-04 | 1624 | 0.333333 | 3.341447 | 1247220 | GPC4      |
| 3406.612 | -4354 | 1.39E-04 | 1846 | 0.333333 | 3.341217 | 1302710 | PSMD3     |
| 3091.393 | -4354 | 1.39E-04 | 1738 | 0.333333 | 3.341217 | 1274042 | LMBRD1    |
| 3726.978 | -4354 | 1.39E-04 | 1947 | 0.333333 | 3.340987 | 1327448 | PSMC6     |
| 2574.613 | -4354 | 1.39E-04 | 1771 | 0.333333 | 3.340987 | 1224742 | VWF       |
| 2625.302 | -4354 | 1.38E-04 | 1736 | 0.333333 | 3.340758 | 1236442 | SEMA5A    |
| 2830.08  | -4354 | 1.38E-04 | 1702 | 0.333333 | 3.340758 | 1249266 | FGB       |
| 3391.505 | -4354 | 1.38E-04 | 1656 | 0.333333 | 3.340758 | 1286874 | PKN1      |
| 2962.417 | -4354 | 1.38E-04 | 1628 | 0.333333 | 3.340758 | 1286960 | TBX15     |
| 2981.244 | -4354 | 1.38E-04 | 1625 | 0.333333 | 3.340758 | 1286944 | TNFSF8    |
| 2952.689 | -4354 | 1.38E-04 | 1836 | 0.333333 | 3.340528 | 1279006 | PRKCB     |
| 3723.16  | -4354 | 1.38E-04 | 1769 | 0.333333 | 3.340528 | 1341218 | LGR4      |
| 3015.009 | -4354 | 1.38E-04 | 1730 | 0.333333 | 3.340528 | 1310804 | INPP4B    |
| 3216.449 | -4354 | 1.38E-04 | 1726 | 0.333333 | 3.340528 | 1311394 | IKBKG     |
| 3574.987 | -4354 | 1.38E-04 | 1703 | 0.333333 | 3.340528 | 1349110 | DDX5      |
| 3487.67  | -4354 | 1.38E-04 | 1605 | 0.333333 | 3.340528 | 1340484 | LMNB2     |
| 8286.707 | -4354 | 1.38E-04 | 1590 | 0.333333 | 3.340528 | 3662752 | DEFA4     |
| 2550.811 | -4354 | 1.38E-04 | 1556 | 0.333333 | 3.340528 | 1207712 | SCPEP1    |
| 2593.406 | -4354 | 1.38E-04 | 1749 | 0.333333 | 3.340299 | 1239354 | LAMC2     |
| 3133.374 | -4354 | 1.38E-04 | 1723 | 0.333333 | 3.340299 | 1311452 | ATP6V0A1  |
| 2889.424 | -4354 | 1.38E-04 | 1701 | 0.333333 | 3.340299 | 1266198 | DOCK2     |
| 3176.674 | -4354 | 1.38E-04 | 1774 | 0.333333 | 3.340069 | 1305634 | ERG       |
| 2865.971 | -4354 | 1.38E-04 | 1742 | 0.333333 | 3.340069 | 1241876 | NCAM2     |
| 2981.514 | -4354 | 1.38E-04 | 1706 | 0.333333 | 3.340069 | 1290922 | ABHD5     |
| 3556.02  | -4354 | 1.38E-04 | 1696 | 0.333333 | 3.340069 | 1320822 | SACM1L    |
| 3338.863 | -4354 | 1.38E-04 | 1650 | 0.333333 | 3.340069 | 1314650 | HSD3B7    |
| 2958.804 | -4354 | 1.38E-04 | 1821 | 0.333333 | 3.339839 | 1304520 | VAV2      |
| 2893.95  | -4354 | 1.38E-04 | 1795 | 0.333333 | 3.339839 | 1234426 | GRM2      |
| 2961.274 | -4354 | 1.38E-04 | 1748 | 0.333333 | 3.339839 | 1289204 | REL       |
| 2886.643 | -4354 | 1.38E-04 | 1669 | 0.333333 | 3.339839 | 1242912 | BID       |
| 3352.727 | -4354 | 1.38E-04 | 1561 | 0.333333 | 3.339839 | 1339130 | LDB1      |
| 2763.424 | -4354 | 1.38E-04 | 1798 | 0.333333 | 3.33961  | 1275132 | ADCY9     |
| 3466.491 | -4354 | 1.38E-04 | 1777 | 0.333333 | 3.33961  | 1389540 | ATG16L1   |
| 3636.277 | -4354 | 1.38E-04 | 1663 | 0.333333 | 3.33961  | 1381966 | FOX M1    |
| 2419.362 | -4354 | 1.38E-04 | 1535 | 0.333333 | 3.33961  | 1183442 | TNFRSF11B |

|          |       |          |      |          |          |         |         |
|----------|-------|----------|------|----------|----------|---------|---------|
| 3856.326 | -4354 | 1.38E-04 | 1789 | 0.333333 | 3.33938  | 1336706 | OGDH    |
| 2539.523 | -4354 | 1.38E-04 | 1731 | 0.333333 | 3.33938  | 1218296 | CLU     |
| 3009.407 | -4354 | 1.38E-04 | 1691 | 0.333333 | 3.33938  | 1301662 | SLC39A8 |
| 3017.514 | -4354 | 1.38E-04 | 1664 | 0.333333 | 3.33938  | 1268176 | HSD17B6 |
| 3044.895 | -4354 | 1.38E-04 | 1796 | 0.333333 | 3.33915  | 1283246 | ARRB1   |
| 2548.537 | -4354 | 1.38E-04 | 1720 | 0.333333 | 3.33915  | 1217878 | ACKR3   |
| 3607.871 | -4354 | 1.38E-04 | 1663 | 0.333333 | 3.33915  | 1313448 | RASA3   |
| 2669.599 | -4354 | 1.38E-04 | 1646 | 0.333333 | 3.33915  | 1218000 | KCNJ16  |
| 3097.375 | -4354 | 1.38E-04 | 1762 | 0.333333 | 3.338921 | 1293070 | ACLY    |
| 3169.198 | -4354 | 1.38E-04 | 1682 | 0.333333 | 3.338921 | 1319268 | LPIN1   |
| 2827.969 | -4354 | 1.38E-04 | 1679 | 0.333333 | 3.338921 | 1264286 | CITED2  |
| 2698.528 | -4354 | 1.38E-04 | 1579 | 0.333333 | 3.338921 | 1242154 | CX3CR1  |
| 2694.144 | -4354 | 1.38E-04 | 1760 | 0.333333 | 3.338691 | 1207092 | CTSB    |
| 2895.857 | -4354 | 1.38E-04 | 1738 | 0.333333 | 3.338691 | 1278548 | WNT4    |
| 2615.768 | -4354 | 1.38E-04 | 1639 | 0.333333 | 3.338691 | 1232230 | PDK4    |
| 2666.681 | -4354 | 1.38E-04 | 1610 | 0.333333 | 3.338691 | 1183736 | CYP11B1 |
| 2993.302 | -4354 | 1.38E-04 | 1598 | 0.333333 | 3.338691 | 1311018 | CAB39L  |
| 2590.988 | -4354 | 1.38E-04 | 1804 | 0.333333 | 3.338462 | 1206812 | TNC     |
| 3530.312 | -4354 | 1.38E-04 | 1787 | 0.333333 | 3.338462 | 1342274 | TRAF2   |
| 2877.302 | -4354 | 1.38E-04 | 1634 | 0.333333 | 3.338462 | 1291006 | PPP2R5A |
| 2794.957 | -4354 | 1.38E-04 | 1577 | 0.333333 | 3.338462 | 1254138 | JAG2    |
| 3038.301 | -4354 | 1.38E-04 | 1786 | 0.333333 | 3.338232 | 1291176 | CACNB2  |
| 2574.253 | -4354 | 1.38E-04 | 1728 | 0.333333 | 3.338232 | 1219582 | LTBP1   |
| 3248.357 | -4354 | 1.38E-04 | 1613 | 0.333333 | 3.338232 | 1332552 | CHKA    |
| 2850.506 | -4354 | 1.38E-04 | 1611 | 0.333333 | 3.338232 | 1246554 | ATP1B3  |
| 2814.341 | -4354 | 1.38E-04 | 1592 | 0.333333 | 3.338232 | 1196708 | PAX7    |
| 2714.594 | -4354 | 1.38E-04 | 1586 | 0.333333 | 3.338232 | 1233722 | DIRAS3  |
| 3292.538 | -4354 | 1.38E-04 | 1507 | 0.333333 | 3.338232 | 1284080 | BRMS1   |
| 3564.566 | -4354 | 1.38E-04 | 1735 | 0.333333 | 3.338002 | 1342152 | SEM1    |
| 2885.392 | -4354 | 1.38E-04 | 1703 | 0.333333 | 3.338002 | 1232622 | CYP26B1 |
| 2675.336 | -4354 | 1.38E-04 | 1695 | 0.333333 | 3.338002 | 1204704 | CDH19   |
| 3010.453 | -4354 | 1.38E-04 | 1540 | 0.333333 | 3.338002 | 1241280 | ERN2    |
| 2684.612 | -4354 | 1.38E-04 | 1847 | 0.333333 | 3.337773 | 1218450 | FLT1    |
| 2940.511 | -4354 | 1.38E-04 | 1784 | 0.333333 | 3.337773 | 1256760 | PRKAA2  |
| 2775.143 | -4354 | 1.38E-04 | 1779 | 0.333333 | 3.337773 | 1250754 | SLIT3   |
| 2924.366 | -4354 | 1.38E-04 | 1770 | 0.333333 | 3.337773 | 1195428 | LPAR1   |
| 2915.791 | -4354 | 1.38E-04 | 1700 | 0.333333 | 3.337773 | 1233862 | ESRRB   |
| 3174.61  | -4354 | 1.38E-04 | 1694 | 0.333333 | 3.337773 | 1252976 | PRMT8   |
| 2612.027 | -4354 | 1.38E-04 | 1686 | 0.333333 | 3.337773 | 1194290 | GREM2   |
| 3495.698 | -4354 | 1.38E-04 | 1665 | 0.333333 | 3.337773 | 1318610 | PIN1    |
| 3065.506 | -4354 | 1.38E-04 | 1568 | 0.333333 | 3.337773 | 1236264 | VAMP7   |

|          |       |          |      |          |          |         |         |
|----------|-------|----------|------|----------|----------|---------|---------|
| 3131.169 | -4354 | 1.38E-04 | 1561 | 0.333333 | 3.337773 | 1220172 | ACSBG2  |
| 3323.039 | -4354 | 1.38E-04 | 1555 | 0.333333 | 3.337773 | 1265472 | MSTN    |
| 4916.597 | -4354 | 1.38E-04 | 1893 | 0.333333 | 3.337543 | 1858970 | PIK3C3  |
| 2477.784 | -4354 | 1.38E-04 | 1829 | 0.333333 | 3.337543 | 1188176 | FGF7    |
| 3051.344 | -4354 | 1.38E-04 | 1753 | 0.333333 | 3.337543 | 1275068 | BMP2K   |
| 3017.862 | -4354 | 1.38E-04 | 1726 | 0.333333 | 3.337543 | 1296474 | FOXO3   |
| 3130.043 | -4354 | 1.38E-04 | 1607 | 0.333333 | 3.337543 | 1282380 | PPP2R5B |
| 3406.746 | -4354 | 1.38E-04 | 1739 | 0.333333 | 3.337313 | 1282924 | POU3F1  |
| 2533.609 | -4354 | 1.38E-04 | 1665 | 0.333333 | 3.337313 | 1187538 | C2      |
| 2581.075 | -4354 | 1.38E-04 | 1656 | 0.333333 | 3.337313 | 1188040 | CD74    |
| 2766.607 | -4354 | 1.38E-04 | 1650 | 0.333333 | 3.337313 | 1199248 | IGFBP1  |
| 3102.33  | -4354 | 1.38E-04 | 1620 | 0.333333 | 3.337313 | 1265180 | AGER    |
| 2792.646 | -4354 | 1.38E-04 | 1603 | 0.333333 | 3.337313 | 1253398 | SEMA4D  |
| 2720.975 | -4354 | 1.38E-04 | 1560 | 0.333333 | 3.337313 | 1250918 | CTSW    |
| 3531.87  | -4354 | 1.38E-04 | 1538 | 0.333333 | 3.337313 | 1348678 | C8G     |
| 2690.555 | -4354 | 1.38E-04 | 1684 | 0.333333 | 3.337084 | 1211766 | MMP14   |
| 2609.743 | -4354 | 1.38E-04 | 1625 | 0.333333 | 3.337084 | 1232628 | RASGRP3 |
| 2644.755 | -4354 | 1.38E-04 | 1596 | 0.333333 | 3.337084 | 1244898 | STS     |
| 3101.316 | -4354 | 1.38E-04 | 1508 | 0.333333 | 3.337084 | 1257384 | BAIAP3  |
| 3242.296 | -4354 | 1.38E-04 | 1695 | 0.333333 | 3.336854 | 1249228 | PSME1   |
| 2548.86  | -4354 | 1.38E-04 | 1690 | 0.333333 | 3.336854 | 1192964 | LRP1    |
| 12712.3  | -4354 | 1.38E-04 | 1584 | 0.333333 | 3.336854 | 4961996 | WT1     |
| 2855.139 | -4354 | 1.38E-04 | 1564 | 0.333333 | 3.336854 | 1195502 | SLCO1C1 |
| 2841.474 | -4354 | 1.38E-04 | 1529 | 0.333333 | 3.336854 | 1188338 | BARX1   |
| 3161.903 | -4354 | 1.38E-04 | 1970 | 0.333333 | 3.336625 | 1272008 | RELA    |
| 2733.11  | -4354 | 1.38E-04 | 1757 | 0.333333 | 3.336625 | 1208178 | ADRB1   |
| 2865.642 | -4354 | 1.38E-04 | 1624 | 0.333333 | 3.336625 | 1225850 | DEGS1   |
| 2679.125 | -4354 | 1.38E-04 | 1600 | 0.333333 | 3.336625 | 1190806 | ARPC2   |
| 3452.238 | -4354 | 1.38E-04 | 1781 | 0.333333 | 3.336395 | 1298018 | PRKACB  |
| 2762.982 | -4354 | 1.38E-04 | 1721 | 0.333333 | 3.336395 | 1235044 | PRKCH   |
| 2731.862 | -4354 | 1.38E-04 | 1691 | 0.333333 | 3.336395 | 1189916 | SFRP1   |
| 2593.411 | -4354 | 1.38E-04 | 1643 | 0.333333 | 3.336395 | 1219988 | GAD1    |
| 3008.255 | -4354 | 1.38E-04 | 1613 | 0.333333 | 3.336395 | 1257628 | HSD17B3 |
| 2946.174 | -4354 | 1.38E-04 | 1594 | 0.333333 | 3.336395 | 1255088 | NTN4    |
| 2931.095 | -4354 | 1.38E-04 | 1537 | 0.333333 | 3.336395 | 1230256 | TERT    |
| 2480.102 | -4354 | 1.38E-04 | 1507 | 0.333333 | 3.336395 | 1221500 | INPP5A  |
| 2786.789 | -4354 | 1.38E-04 | 1704 | 0.333333 | 3.336165 | 1203648 | KCNJ10  |
| 2651.399 | -4354 | 1.38E-04 | 1679 | 0.333333 | 3.336165 | 1206906 | SEMA6D  |
| 2896.853 | -4354 | 1.38E-04 | 1655 | 0.333333 | 3.336165 | 1251932 | LPAR2   |
| 3180.492 | -4354 | 1.38E-04 | 1580 | 0.333333 | 3.336165 | 1275404 | MAP4K2  |
| 2653.812 | -4354 | 1.38E-04 | 1535 | 0.333333 | 3.336165 | 1185356 | S100A7  |



|          |       |          |      |          |          |         |          |
|----------|-------|----------|------|----------|----------|---------|----------|
| 2458.321 | -4354 | 1.38E-04 | 1520 | 0.333333 | 3.336165 | 1183856 | SLC19A3  |
| 2903.531 | -4354 | 1.38E-04 | 1571 | 0.333333 | 3.335936 | 1158614 | SLC22A8  |
| 3559.627 | -4354 | 1.38E-04 | 1882 | 0.333333 | 3.335706 | 1300294 | PCNA     |
| 3413.615 | -4354 | 1.38E-04 | 1709 | 0.333333 | 3.335706 | 1308114 | AP3B1    |
| 2647.488 | -4354 | 1.38E-04 | 1631 | 0.333333 | 3.335706 | 1226752 | ABCG1    |
| 2754.438 | -4354 | 1.38E-04 | 1589 | 0.333333 | 3.335706 | 1238834 | HKDC1    |
| 2744.853 | -4354 | 1.38E-04 | 1558 | 0.333333 | 3.335706 | 1206012 | OSM      |
| 3154.885 | -4354 | 1.38E-04 | 1554 | 0.333333 | 3.335706 | 1234948 | CNTF     |
| 2906.147 | -4354 | 1.38E-04 | 1522 | 0.333333 | 3.335706 | 1207996 | CYP4F8   |
| 3031.368 | -4354 | 1.38E-04 | 1690 | 0.333333 | 3.335476 | 1267722 | TFRC     |
| 2624.027 | -4354 | 1.38E-04 | 1562 | 0.333333 | 3.335476 | 1203874 | FCGR1A   |
| 2725.605 | -4354 | 1.38E-04 | 1490 | 0.333333 | 3.335476 | 1236816 | LFNG     |
| 2855.488 | -4354 | 1.38E-04 | 1745 | 0.333333 | 3.335247 | 1225942 | ALK      |
| 2526.33  | -4354 | 1.38E-04 | 1668 | 0.333333 | 3.335247 | 1180848 | LMOD1    |
| 3100.691 | -4354 | 1.38E-04 | 1620 | 0.333333 | 3.335247 | 1263698 | CXCL14   |
| 2654.971 | -4354 | 1.38E-04 | 1612 | 0.333333 | 3.335247 | 1180466 | LRP2     |
| 3209.6   | -4354 | 1.38E-04 | 1585 | 0.333333 | 3.335247 | 1248814 | TUBB3    |
| 3389.807 | -4354 | 1.38E-04 | 1528 | 0.333333 | 3.335247 | 1330966 | MED9     |
| 2700.213 | -4354 | 1.38E-04 | 1617 | 0.333333 | 3.335017 | 1209162 | RRAGC    |
| 3550.753 | -4354 | 1.38E-04 | 1575 | 0.333333 | 3.335017 | 1331370 | ANAPC15  |
| 3011.959 | -4354 | 1.38E-04 | 1837 | 0.333333 | 3.334788 | 1266456 | ERBB2    |
| 3437.415 | -4354 | 1.38E-04 | 1882 | 0.333333 | 3.334558 | 1262680 | PSMA4    |
| 2966.59  | -4354 | 1.38E-04 | 1742 | 0.333333 | 3.334558 | 1241706 | MAPKAPK2 |
| 2763.644 | -4354 | 1.38E-04 | 1738 | 0.333333 | 3.334558 | 1248038 | HES1     |
| 2883.687 | -4354 | 1.38E-04 | 1685 | 0.333333 | 3.334558 | 1233392 | LPGAT1   |
| 2825.966 | -4354 | 1.38E-04 | 1609 | 0.333333 | 3.334558 | 1216990 | SLCO1B3  |
| 3852.02  | -4354 | 1.38E-04 | 1566 | 0.333333 | 3.334558 | 1312560 | MINPP1   |
| 2976.526 | -4354 | 1.38E-04 | 1556 | 0.333333 | 3.334558 | 1269186 | SRD5A1   |
| 3118.464 | -4354 | 1.38E-04 | 1524 | 0.333333 | 3.334558 | 1206144 | TUBAL3   |
| 2829.665 | -4354 | 1.38E-04 | 1467 | 0.333333 | 3.334558 | 1194508 | PSAPL1   |
| 3513.384 | -4354 | 1.38E-04 | 1854 | 0.333333 | 3.334328 | 1303462 | MAPK9    |
| 3252.394 | -4354 | 1.38E-04 | 1826 | 0.333333 | 3.334328 | 1272242 | SMURF2   |
| 3052.329 | -4354 | 1.38E-04 | 1790 | 0.333333 | 3.334328 | 1246096 | TRDN     |
| 3074.675 | -4354 | 1.38E-04 | 1722 | 0.333333 | 3.334328 | 1246862 | CAT      |
| 2830.669 | -4354 | 1.38E-04 | 1661 | 0.333333 | 3.334328 | 1195524 | CD58     |
| 3098.451 | -4354 | 1.38E-04 | 1570 | 0.333333 | 3.334328 | 1294040 | LLGL2    |
| 2829.922 | -4354 | 1.38E-04 | 1557 | 0.333333 | 3.334328 | 1222076 | CALML5   |
| 3707.664 | -4354 | 1.38E-04 | 1525 | 0.333333 | 3.334328 | 1369974 | CLDN3    |
| 2662.355 | -4354 | 1.38E-04 | 1712 | 0.333333 | 3.334099 | 1168056 | CGA      |
| 2776.392 | -4354 | 1.38E-04 | 1668 | 0.333333 | 3.334099 | 1239742 | MPO      |
| 2975.1   | -4354 | 1.38E-04 | 1535 | 0.333333 | 3.334099 | 1237118 | VEGFB    |

|          |       |          |      |          |          |         |          |
|----------|-------|----------|------|----------|----------|---------|----------|
| 2687.598 | -4354 | 1.38E-04 | 1779 | 0.333333 | 3.333869 | 1220402 | IFNAR2   |
| 2379.336 | -4354 | 1.38E-04 | 1626 | 0.333333 | 3.333869 | 1189216 | ETV5     |
| 2696.043 | -4354 | 1.38E-04 | 1575 | 0.333333 | 3.333869 | 1191562 | AP3B2    |
| 2782.233 | -4354 | 1.38E-04 | 1525 | 0.333333 | 3.333639 | 1204012 | CST1     |
| 2840.053 | -4354 | 1.38E-04 | 1689 | 0.333333 | 3.33341  | 1186990 | NOX5     |
| 2729.306 | -4354 | 1.38E-04 | 1623 | 0.333333 | 3.33341  | 1194794 | HLA-C    |
| 2960.411 | -4354 | 1.38E-04 | 1570 | 0.333333 | 3.33341  | 1249892 | HOMER2   |
| 3329.169 | -4354 | 1.38E-04 | 1533 | 0.333333 | 3.33341  | 1274752 | VPS4A    |
| 3093.962 | -4354 | 1.38E-04 | 1762 | 0.333333 | 3.33318  | 1264990 | MAGI1    |
| 3056.28  | -4354 | 1.38E-04 | 1735 | 0.333333 | 3.33318  | 1255474 | RAPGEF5  |
| 2868.442 | -4354 | 1.38E-04 | 1723 | 0.333333 | 3.33318  | 1215562 | FGA      |
| 2735.643 | -4354 | 1.38E-04 | 1621 | 0.333333 | 3.33318  | 1202674 | S100A8   |
| 3110.322 | -4354 | 1.38E-04 | 1559 | 0.333333 | 3.33318  | 1234854 | UBE2L6   |
| 2865.217 | -4354 | 1.38E-04 | 1831 | 0.333333 | 3.332951 | 1214210 | SNAP25   |
| 2481.09  | -4354 | 1.38E-04 | 1793 | 0.333333 | 3.332951 | 1164088 | EDNRA    |
| 3231.193 | -4354 | 1.38E-04 | 1731 | 0.333333 | 3.332951 | 1256478 | SOX2     |
| 3111.47  | -4354 | 1.38E-04 | 1726 | 0.333333 | 3.332951 | 1231556 | ARAF     |
| 2474.993 | -4354 | 1.38E-04 | 1610 | 0.333333 | 3.332721 | 1163100 | KCNK3    |
| 2675.87  | -4354 | 1.38E-04 | 1565 | 0.333333 | 3.332721 | 1184194 | C1QC     |
| 2516.097 | -4354 | 1.38E-04 | 1486 | 0.333333 | 3.332721 | 1189224 | MAP3K7CL |
| 2663.611 | -4354 | 1.38E-04 | 1720 | 0.333333 | 3.332491 | 1238208 | WWC1     |
| 3835.289 | -4354 | 1.38E-04 | 1708 | 0.333333 | 3.332491 | 1446382 | HDAC9    |
| 4217.147 | -4354 | 1.38E-04 | 1592 | 0.333333 | 3.332491 | 1327794 | NDUFB5   |
| 2591.273 | -4354 | 1.38E-04 | 1516 | 0.333333 | 3.332491 | 1173366 | SMPDL3A  |
| 2618.988 | -4354 | 1.38E-04 | 1784 | 0.333333 | 3.332262 | 1192534 | CD36     |
| 3250.975 | -4354 | 1.38E-04 | 1742 | 0.333333 | 3.332262 | 1281314 | ADK      |
| 2784.186 | -4354 | 1.38E-04 | 1616 | 0.333333 | 3.332262 | 1249696 | ERC1     |
| 3224.78  | -4354 | 1.38E-04 | 1525 | 0.333333 | 3.332262 | 1217572 | TIGAR    |
| 2670.028 | -4354 | 1.38E-04 | 1470 | 0.333333 | 3.332262 | 1144342 | PDZD7    |
| 3313.501 | -4354 | 1.38E-04 | 1704 | 0.333333 | 3.332032 | 1291040 | HERC1    |
| 2763.04  | -4354 | 1.38E-04 | 1647 | 0.333333 | 3.332032 | 1163964 | GNGT1    |
| 3148.667 | -4354 | 1.38E-04 | 1632 | 0.333333 | 3.332032 | 1245610 | GCLM     |
| 3576.894 | -4354 | 1.38E-04 | 1623 | 0.333333 | 3.332032 | 1318614 | MECR     |
| 2867.095 | -4354 | 1.38E-04 | 1757 | 0.333333 | 3.331803 | 1243592 | DAAM1    |
| 3028.872 | -4354 | 1.38E-04 | 1637 | 0.333333 | 3.331803 | 1257764 | DTX1     |
| 3270.353 | -4354 | 1.38E-04 | 1583 | 0.333333 | 3.331803 | 1203336 | TRPC5    |
| 2644.598 | -4354 | 1.38E-04 | 1590 | 0.333333 | 3.331573 | 1212188 | MYO1C    |
| 3049.404 | -4354 | 1.38E-04 | 1545 | 0.333333 | 3.331573 | 1256558 | DHCR7    |
| 3452.348 | -4354 | 1.38E-04 | 1537 | 0.333333 | 3.331573 | 1303142 | RRAGB    |
| 2452.264 | -4354 | 1.38E-04 | 1498 | 0.333333 | 3.331573 | 1079504 | IL25     |
| 3221.408 | -4354 | 1.38E-04 | 1553 | 0.333333 | 3.331343 | 1244208 | PLA2G6   |

|          |       |          |      |          |          |         |         |
|----------|-------|----------|------|----------|----------|---------|---------|
| 2570.994 | -4354 | 1.38E-04 | 1538 | 0.333333 | 3.331343 | 1139936 | VSIR    |
| 3022.364 | -4354 | 1.38E-04 | 1463 | 0.333333 | 3.331343 | 1194124 | PRPS1L1 |
| 2558.081 | -4354 | 1.38E-04 | 1680 | 0.333333 | 3.331114 | 1196528 | ASPH    |
| 3115.39  | -4354 | 1.38E-04 | 1580 | 0.333333 | 3.331114 | 1232232 | CHPT1   |
| 3358.925 | -4354 | 1.38E-04 | 1544 | 0.333333 | 3.331114 | 1261758 | GSTM2   |
| 2729.368 | -4354 | 1.38E-04 | 1469 | 0.333333 | 3.331114 | 1155016 | P2RX3   |
| 2499.734 | -4354 | 1.38E-04 | 1723 | 0.333333 | 3.330884 | 1163560 | COL6A2  |
| 2975.322 | -4354 | 1.38E-04 | 1680 | 0.333333 | 3.330884 | 1227746 | HACD2   |
| 2419.748 | -4354 | 1.38E-04 | 1664 | 0.333333 | 3.330884 | 1159684 | FCER1A  |
| 2552.269 | -4354 | 1.38E-04 | 1586 | 0.333333 | 3.330884 | 1168202 | IL18RAP |
| 3080.124 | -4354 | 1.38E-04 | 1482 | 0.333333 | 3.330884 | 1263500 | NECTIN4 |
| 2749.803 | -4354 | 1.38E-04 | 1477 | 0.333333 | 3.330884 | 1208554 | ULBP2   |
| 3206.477 | -4354 | 1.38E-04 | 1903 | 0.333333 | 3.330654 | 1233196 | CUL1    |
| 3065.63  | -4354 | 1.38E-04 | 1745 | 0.333333 | 3.330654 | 1217596 | TSHR    |
| 2631.431 | -4354 | 1.38E-04 | 1613 | 0.333333 | 3.330654 | 1190936 | STC1    |
| 2508.769 | -4354 | 1.38E-04 | 1554 | 0.333333 | 3.330654 | 1156900 | SMAD9   |
| 2666.687 | -4354 | 1.38E-04 | 1541 | 0.333333 | 3.330654 | 1202164 | SEMA5B  |
| 2495.114 | -4354 | 1.38E-04 | 1734 | 0.333333 | 3.330425 | 1138994 | HRH1    |
| 3037.39  | -4354 | 1.38E-04 | 1581 | 0.333333 | 3.330425 | 1246580 | CCDC6   |
| 2710.322 | -4354 | 1.38E-04 | 1580 | 0.333333 | 3.330425 | 1166668 | ALPI    |
| 2708.133 | -4354 | 1.38E-04 | 1764 | 0.333333 | 3.330195 | 1211224 | CTBP2   |
| 2527.573 | -4354 | 1.38E-04 | 1517 | 0.333333 | 3.330195 | 1134782 | FTH1    |
| 2482.359 | -4354 | 1.38E-04 | 1477 | 0.333333 | 3.330195 | 1134782 | ALOX15B |
| 2522.937 | -4354 | 1.38E-04 | 1644 | 0.333333 | 3.329966 | 1185796 | CEACAM1 |
| 3086.897 | -4354 | 1.38E-04 | 1643 | 0.333333 | 3.329966 | 1229752 | HMGCR   |
| 2590.806 | -4354 | 1.38E-04 | 1571 | 0.333333 | 3.329966 | 1197686 | ADGRG1  |
| 2772.944 | -4354 | 1.38E-04 | 1554 | 0.333333 | 3.329966 | 1195810 | ADCY4   |
| 2300.282 | -4354 | 1.38E-04 | 1523 | 0.333333 | 3.329966 | 1138442 | GUCY1A1 |
| 2558.833 | -4354 | 1.38E-04 | 1508 | 0.333333 | 3.329966 | 1134052 | S100A6  |
| 2661.12  | -4354 | 1.38E-04 | 1473 | 0.333333 | 3.329966 | 1097984 | S100G   |
| 3470.981 | -4354 | 1.38E-04 | 1722 | 0.333333 | 3.329736 | 1260090 | DNAJA1  |
| 3091.291 | -4354 | 1.38E-04 | 1666 | 0.333333 | 3.329506 | 1260032 | CLEC16A |
| 2758.849 | -4354 | 1.38E-04 | 1597 | 0.333333 | 3.329506 | 1195424 | TMPRSS2 |
| 2830.297 | -4354 | 1.38E-04 | 1591 | 0.333333 | 3.329506 | 1214494 | HOXA10  |
| 2558.776 | -4354 | 1.38E-04 | 1540 | 0.333333 | 3.329506 | 1129960 | ZIC3    |
| 2722.883 | -4354 | 1.38E-04 | 1707 | 0.333333 | 3.329277 | 1159210 | RAC2    |
| 2538.942 | -4354 | 1.38E-04 | 1619 | 0.333333 | 3.329277 | 1139512 | BMP5    |
| 2645.497 | -4354 | 1.38E-04 | 1521 | 0.333333 | 3.329277 | 1174216 | MAFF    |
| 2456.275 | -4354 | 1.38E-04 | 1507 | 0.333333 | 3.329277 | 1135674 | COLEC11 |
| 2616.129 | -4354 | 1.38E-04 | 1446 | 0.333333 | 3.329277 | 1149096 | PEG3    |
| 2534.161 | -4354 | 1.38E-04 | 1587 | 0.333333 | 3.329047 | 1133680 | NR1H4   |

|          |       |          |      |          |          |         |          |
|----------|-------|----------|------|----------|----------|---------|----------|
| 2998.207 | -4354 | 1.38E-04 | 1475 | 0.333333 | 3.329047 | 1258960 | EFNA4    |
| 2461.001 | -4354 | 1.37E-04 | 1579 | 0.333333 | 3.328817 | 1117240 | C1QB     |
| 3065.633 | -4354 | 1.37E-04 | 1577 | 0.333333 | 3.328817 | 1209612 | GP6      |
| 2614.683 | -4354 | 1.37E-04 | 1546 | 0.333333 | 3.328817 | 1161612 | APOC1    |
| 2572.395 | -4354 | 1.37E-04 | 1489 | 0.333333 | 3.328817 | 1165566 | ADAP1    |
| 2990.14  | -4354 | 1.37E-04 | 1530 | 0.333333 | 3.328588 | 1239184 | TCF7     |
| 2633.013 | -4354 | 1.37E-04 | 1518 | 0.333333 | 3.328588 | 1109142 | NOX3     |
| 2749.659 | -4354 | 1.37E-04 | 1507 | 0.333333 | 3.328588 | 1096028 | IFNW1    |
| 2532.874 | -4354 | 1.37E-04 | 1608 | 0.333333 | 3.328358 | 1181760 | FZD5     |
| 2661.227 | -4354 | 1.37E-04 | 1536 | 0.333333 | 3.328358 | 1190770 | PDP1     |
| 2852.664 | -4354 | 1.37E-04 | 1502 | 0.333333 | 3.328358 | 1192400 | AGPAT1   |
| 3091.629 | -4354 | 1.37E-04 | 1477 | 0.333333 | 3.328358 | 1220106 | TBC1D17  |
| 2713.521 | -4354 | 1.37E-04 | 1545 | 0.333333 | 3.328129 | 1183486 | CEACAM8  |
| 3317.041 | -4354 | 1.37E-04 | 1520 | 0.333333 | 3.328129 | 1244938 | CLDN16   |
| 2814.693 | -4354 | 1.37E-04 | 1937 | 0.333333 | 3.327899 | 1216696 | PTK2     |
| 3182.543 | -4354 | 1.37E-04 | 1626 | 0.333333 | 3.327899 | 1240766 | EIF2AK3  |
| 2735.329 | -4354 | 1.37E-04 | 1601 | 0.333333 | 3.327899 | 1182606 | IDH2     |
| 2725.054 | -4354 | 1.37E-04 | 1565 | 0.333333 | 3.327899 | 1201294 | CDKN2D   |
| 2600.35  | -4354 | 1.37E-04 | 1679 | 0.333333 | 3.327669 | 1152368 | CDH4     |
| 2772.134 | -4354 | 1.37E-04 | 1700 | 0.333333 | 3.32744  | 1190228 | SCARB2   |
| 2636.985 | -4354 | 1.37E-04 | 1694 | 0.333333 | 3.32744  | 1184972 | IDS      |
| 2435.382 | -4354 | 1.37E-04 | 1660 | 0.333333 | 3.32744  | 1143704 | PLXNA2   |
| 2961.699 | -4354 | 1.37E-04 | 1899 | 0.333333 | 3.32721  | 1208132 | VCP      |
| 2573.201 | -4354 | 1.37E-04 | 1847 | 0.333333 | 3.32721  | 1153214 | SHC1     |
| 2484.207 | -4354 | 1.37E-04 | 1753 | 0.333333 | 3.32721  | 1135360 | NRP1     |
| 2979.709 | -4354 | 1.37E-04 | 1702 | 0.333333 | 3.32721  | 1187402 | NTRK3    |
| 2160.857 | -4354 | 1.37E-04 | 1615 | 0.333333 | 3.32721  | 1106126 | SERPINE1 |
| 2171.111 | -4354 | 1.37E-04 | 1591 | 0.333333 | 3.32721  | 1069634 | CYP1B1   |
| 3049.923 | -4354 | 1.37E-04 | 1551 | 0.333333 | 3.32721  | 1180220 | SLC18A2  |
| 2679.035 | -4354 | 1.37E-04 | 1543 | 0.333333 | 3.32721  | 1131418 | SLCO1B1  |
| 2460.395 | -4354 | 1.37E-04 | 1526 | 0.333333 | 3.32721  | 1104078 | SOX10    |
| 3158.841 | -4354 | 1.37E-04 | 1476 | 0.333333 | 3.32721  | 1170698 | SLC25A31 |
| 2660.862 | -4354 | 1.37E-04 | 1707 | 0.333333 | 3.32698  | 1178488 | CXCR5    |
| 2688.296 | -4354 | 1.37E-04 | 1667 | 0.333333 | 3.32698  | 1179100 | AK5      |
| 2590.122 | -4354 | 1.37E-04 | 1563 | 0.333333 | 3.32698  | 1167046 | PLA2G4C  |
| 2259.855 | -4354 | 1.37E-04 | 1554 | 0.333333 | 3.32698  | 1092242 | TIMP3    |
| 2668.723 | -4354 | 1.37E-04 | 1707 | 0.333333 | 3.326751 | 1170636 | RBPJ     |
| 2700.989 | -4354 | 1.37E-04 | 1698 | 0.333333 | 3.326751 | 1161010 | LIFR     |
| 2915.514 | -4354 | 1.37E-04 | 1683 | 0.333333 | 3.326751 | 1184878 | FGFR4    |
| 2906.777 | -4354 | 1.37E-04 | 1680 | 0.333333 | 3.326751 | 1218046 | SRGAP3   |
| 2875.649 | -4354 | 1.37E-04 | 1659 | 0.333333 | 3.326751 | 1207644 | UBE2H    |

|          |       |          |      |          |          |         |          |
|----------|-------|----------|------|----------|----------|---------|----------|
| 3399.335 | -4354 | 1.37E-04 | 1656 | 0.333333 | 3.326751 | 1247660 | CKS2     |
| 2580.145 | -4354 | 1.37E-04 | 1619 | 0.333333 | 3.326751 | 1177094 | DDAH1    |
| 2658.639 | -4354 | 1.37E-04 | 1607 | 0.333333 | 3.326751 | 1101936 | FGF4     |
| 2409.486 | -4354 | 1.37E-04 | 1554 | 0.333333 | 3.326751 | 1124354 | ANPEP    |
| 2541.064 | -4354 | 1.37E-04 | 1738 | 0.333333 | 3.326521 | 1123312 | PTGIS    |
| 3611.106 | -4354 | 1.37E-04 | 1708 | 0.333333 | 3.326521 | 1288982 | TTK      |
| 2862.567 | -4354 | 1.37E-04 | 1658 | 0.333333 | 3.326521 | 1182340 | WDFY3    |
| 2507.404 | -4354 | 1.37E-04 | 1646 | 0.333333 | 3.326521 | 1125202 | RAB8B    |
| 2566.904 | -4354 | 1.37E-04 | 1558 | 0.333333 | 3.326521 | 1096662 | KCNA4    |
| 3198.397 | -4354 | 1.37E-04 | 1506 | 0.333333 | 3.326521 | 1265416 | IPPK     |
| 3209.173 | -4354 | 1.37E-04 | 1752 | 0.333333 | 3.326292 | 1233880 | RPS6KA5  |
| 2649.157 | -4354 | 1.37E-04 | 1687 | 0.333333 | 3.326292 | 1147270 | TF       |
| 2764.131 | -4354 | 1.37E-04 | 1532 | 0.333333 | 3.326292 | 1190654 | DUSP2    |
| 2516.729 | -4354 | 1.37E-04 | 1497 | 0.333333 | 3.326292 | 1122246 | AIRE     |
| 3372.767 | -4354 | 1.37E-04 | 1474 | 0.333333 | 3.326292 | 1346308 | PLA2G1B  |
| 2624.108 | -4354 | 1.37E-04 | 1704 | 0.333333 | 3.326062 | 1165956 | IL2RA    |
| 2787.64  | -4354 | 1.37E-04 | 1638 | 0.333333 | 3.326062 | 1197056 | TOX      |
| 2473.536 | -4354 | 1.37E-04 | 1633 | 0.333333 | 3.326062 | 1118776 | CD86     |
| 2538.165 | -4354 | 1.37E-04 | 1601 | 0.333333 | 3.326062 | 1163090 | APBB1IP  |
| 3033.77  | -4354 | 1.37E-04 | 1575 | 0.333333 | 3.326062 | 1163464 | TAP1     |
| 2522.051 | -4354 | 1.37E-04 | 1743 | 0.333333 | 3.325832 | 1116008 | PTGER3   |
| 2689.002 | -4354 | 1.37E-04 | 1676 | 0.333333 | 3.325832 | 1177852 | NFATC1   |
| 2506.047 | -4354 | 1.37E-04 | 1658 | 0.333333 | 3.325832 | 1112564 | IRF1     |
| 3401.569 | -4354 | 1.37E-04 | 1584 | 0.333333 | 3.325832 | 1251342 | DIABLO   |
| 3119.252 | -4354 | 1.37E-04 | 1493 | 0.333333 | 3.325832 | 1208030 | PSENEN   |
| 3380.446 | -4354 | 1.37E-04 | 1851 | 0.333333 | 3.325603 | 1265520 | HMGB1    |
| 3149.25  | -4354 | 1.37E-04 | 1783 | 0.333333 | 3.325603 | 1217090 | ARHGEF12 |
| 3192.957 | -4354 | 1.37E-04 | 1779 | 0.333333 | 3.325603 | 1227752 | CSNK2A2  |
| 3041.365 | -4354 | 1.37E-04 | 1517 | 0.333333 | 3.325373 | 1234724 | PIAS3    |
| 2682.222 | -4354 | 1.37E-04 | 1639 | 0.333333 | 3.325144 | 1171382 | GNA11    |
| 2702.93  | -4354 | 1.37E-04 | 1633 | 0.333333 | 3.325144 | 1183344 | SOX4     |
| 2694.711 | -4354 | 1.37E-04 | 1601 | 0.333333 | 3.325144 | 1159868 | BNIP3L   |
| 2788.151 | -4354 | 1.37E-04 | 1746 | 0.333333 | 3.324914 | 1170910 | KITLG    |
| 2628.291 | -4354 | 1.37E-04 | 1614 | 0.333333 | 3.324914 | 1133778 | CYP3A5   |
| 2579.996 | -4354 | 1.37E-04 | 1569 | 0.333333 | 3.324914 | 1162506 | CTLA4    |
| 5527.744 | -4354 | 1.37E-04 | 1489 | 0.333333 | 3.324914 | 1441238 | MT-ND6   |
| 2497.272 | -4354 | 1.37E-04 | 1642 | 0.333333 | 3.324684 | 1148670 | THSD4    |
| 3278.039 | -4354 | 1.37E-04 | 1568 | 0.333333 | 3.324684 | 1234652 | MAD2L2   |
| 3091.234 | -4354 | 1.37E-04 | 1561 | 0.333333 | 3.324684 | 1239848 | MYL5     |
| 2513.507 | -4354 | 1.37E-04 | 1544 | 0.333333 | 3.324684 | 1149192 | ABCC1    |
| 2273.512 | -4354 | 1.37E-04 | 1459 | 0.333333 | 3.324684 | 1102506 | BEST1    |

|          |       |          |      |          |          |         |          |
|----------|-------|----------|------|----------|----------|---------|----------|
| 2354.829 | -4354 | 1.37E-04 | 1696 | 0.333333 | 3.324455 | 1107510 | FGF1     |
| 2951.341 | -4354 | 1.37E-04 | 1622 | 0.333333 | 3.324455 | 1170490 | DIRAS2   |
| 2692.187 | -4354 | 1.37E-04 | 1503 | 0.333333 | 3.324455 | 1145682 | IL26     |
| 3183.441 | -4354 | 1.37E-04 | 1628 | 0.333333 | 3.324225 | 1209536 | NME1     |
| 2430.383 | -4354 | 1.37E-04 | 1763 | 0.333333 | 3.323995 | 1084956 | LCP2     |
| 2231.784 | -4354 | 1.37E-04 | 1671 | 0.333333 | 3.323995 | 1107896 | VCL      |
| 3390.546 | -4354 | 1.37E-04 | 1476 | 0.333333 | 3.323995 | 1230450 | ECI1     |
| 2466.853 | -4354 | 1.37E-04 | 1455 | 0.333333 | 3.323995 | 1104472 | DNASE2B  |
| 3869.263 | -4354 | 1.37E-04 | 1745 | 0.333333 | 3.323766 | 1247142 | HSP90AB1 |
| 2603.124 | -4354 | 1.37E-04 | 1613 | 0.333333 | 3.323766 | 1156814 | TRAM2    |
| 2860.157 | -4354 | 1.37E-04 | 1578 | 0.333333 | 3.323766 | 1199544 | TRIB3    |
| 2646.095 | -4354 | 1.37E-04 | 1544 | 0.333333 | 3.323766 | 1130632 | TKT      |
| 2931.135 | -4354 | 1.37E-04 | 1686 | 0.333333 | 3.323536 | 1188254 | MAML2    |
| 2383.773 | -4354 | 1.37E-04 | 1669 | 0.333333 | 3.323536 | 1086132 | GUCY1A2  |
| 3168.723 | -4354 | 1.37E-04 | 1577 | 0.333333 | 3.323536 | 1262328 | LRIG2    |
| 2568.297 | -4354 | 1.37E-04 | 1660 | 0.333333 | 3.323307 | 1126814 | ITGB8    |
| 2242.131 | -4354 | 1.37E-04 | 1489 | 0.333333 | 3.323307 | 1063690 | LITAF    |
| 2801.498 | -4354 | 1.37E-04 | 1428 | 0.333333 | 3.323307 | 1055664 | MGAM2    |
| 2862.562 | -4354 | 1.37E-04 | 1714 | 0.333333 | 3.323077 | 1182356 | MAPT     |
| 2208.693 | -4354 | 1.37E-04 | 1578 | 0.333333 | 3.323077 | 1070646 | ETS2     |
| 2508.682 | -4354 | 1.37E-04 | 1463 | 0.333333 | 3.323077 | 1103862 | MLKL     |
| 2584.847 | -4354 | 1.37E-04 | 1630 | 0.333333 | 3.322847 | 1171270 | PRKAG2   |
| 2376.92  | -4354 | 1.37E-04 | 1573 | 0.333333 | 3.322847 | 1108814 | ARHGEF40 |
| 2305.405 | -4354 | 1.37E-04 | 1502 | 0.333333 | 3.322847 | 1077072 | IHH      |
| 2728.76  | -4354 | 1.37E-04 | 1471 | 0.333333 | 3.322847 | 1080320 | AIPL1    |
| 3161.337 | -4354 | 1.37E-04 | 1878 | 0.333333 | 3.322618 | 1222098 | MAPK8    |
| 2656.298 | -4354 | 1.37E-04 | 1669 | 0.333333 | 3.322618 | 1143456 | PPP2R2B  |
| 2819.918 | -4354 | 1.37E-04 | 1566 | 0.333333 | 3.322618 | 1164330 | LRP5     |
| 2795.241 | -4354 | 1.37E-04 | 1565 | 0.333333 | 3.322618 | 1191302 | PRKAB2   |
| 3342.269 | -4354 | 1.37E-04 | 1672 | 0.333333 | 3.322388 | 1243762 | EZH2     |
| 3642.203 | -4354 | 1.37E-04 | 1610 | 0.333333 | 3.322388 | 1171812 | CYC1     |
| 2355.018 | -4354 | 1.37E-04 | 1587 | 0.333333 | 3.322388 | 1077422 | F2RL2    |
| 2342.042 | -4354 | 1.37E-04 | 1445 | 0.333333 | 3.322388 | 1076210 | STING1   |
| 3066.344 | -4354 | 1.37E-04 | 1845 | 0.333333 | 3.322158 | 1195588 | MAP3K7   |
| 3311.943 | -4354 | 1.37E-04 | 1772 | 0.333333 | 3.322158 | 1168400 | CD4      |
| 3151.351 | -4354 | 1.37E-04 | 1702 | 0.333333 | 3.322158 | 1204326 | AGPAT5   |
| 3051.789 | -4354 | 1.37E-04 | 1615 | 0.333333 | 3.322158 | 1195960 | IP6K3    |
| 3087.582 | -4354 | 1.37E-04 | 1602 | 0.333333 | 3.322158 | 1189398 | PRPS2    |
| 2899.533 | -4354 | 1.37E-04 | 1590 | 0.333333 | 3.321929 | 1171570 | FADD     |
| 2842.044 | -4354 | 1.37E-04 | 1575 | 0.333333 | 3.321929 | 1199606 | BCL11B   |
| 2973.851 | -4354 | 1.37E-04 | 1542 | 0.333333 | 3.321929 | 1191810 | BTD      |

|          |       |          |      |          |          |         |          |
|----------|-------|----------|------|----------|----------|---------|----------|
| 2616.623 | -4354 | 1.37E-04 | 1503 | 0.333333 | 3.321929 | 1121088 | CLN3     |
| 2801.512 | -4354 | 1.37E-04 | 1443 | 0.333333 | 3.321929 | 1098698 | HPSE     |
| 3544.637 | -4354 | 1.37E-04 | 1714 | 0.333333 | 3.321699 | 1252934 | CDC7     |
| 2697.973 | -4354 | 1.37E-04 | 1682 | 0.333333 | 3.321699 | 1155732 | CLIP1    |
| 2641.785 | -4354 | 1.37E-04 | 1630 | 0.333333 | 3.321699 | 1133234 | ENPP1    |
| 2885.777 | -4354 | 1.37E-04 | 1543 | 0.333333 | 3.321699 | 1172684 | ALDH18A1 |
| 3260.699 | -4354 | 1.37E-04 | 1624 | 0.333333 | 3.32147  | 1202950 | WWP1     |
| 2562.52  | -4354 | 1.37E-04 | 1611 | 0.333333 | 3.32147  | 1151644 | PTPRF    |
| 2818.199 | -4354 | 1.37E-04 | 1603 | 0.333333 | 3.32147  | 1143748 | IDH1     |
| 2640.403 | -4354 | 1.37E-04 | 1454 | 0.333333 | 3.32147  | 1112774 | CYTH1    |
| 2846.456 | -4354 | 1.37E-04 | 1730 | 0.333333 | 3.32124  | 1201404 | MAP2K5   |
| 2347.938 | -4354 | 1.37E-04 | 1668 | 0.333333 | 3.32124  | 1105754 | EFNA5    |
| 3075.34  | -4354 | 1.37E-04 | 1639 | 0.333333 | 3.32124  | 1137042 | PSMB9    |
| 2845.451 | -4354 | 1.37E-04 | 1630 | 0.333333 | 3.32124  | 1177800 | MTMR3    |
| 2569.88  | -4354 | 1.37E-04 | 1545 | 0.333333 | 3.32124  | 1122822 | TNFSF15  |
| 2607.744 | -4354 | 1.37E-04 | 1606 | 0.333333 | 3.32101  | 1124364 | SOAT1    |
| 2594.617 | -4354 | 1.37E-04 | 1582 | 0.333333 | 3.32101  | 1093786 | APOA2    |
| 2498.033 | -4354 | 1.37E-04 | 1548 | 0.333333 | 3.32101  | 1085100 | SV2B     |
| 3893.977 | -4354 | 1.37E-04 | 1547 | 0.333333 | 3.32101  | 1265718 | NANOG    |
| 4919.589 | -4354 | 1.37E-04 | 1487 | 0.333333 | 3.32101  | 1346592 | MT-ND2   |
| 3116.921 | -4354 | 1.37E-04 | 1676 | 0.333333 | 3.320781 | 1169616 | ROCK2    |
| 3547.357 | -4354 | 1.37E-04 | 1643 | 0.333333 | 3.320781 | 1341460 | HDAC4    |
| 2946.703 | -4354 | 1.37E-04 | 1600 | 0.333333 | 3.320781 | 1139720 | VPS4B    |
| 2530.632 | -4354 | 1.37E-04 | 1582 | 0.333333 | 3.320781 | 1152880 | DEPTOR   |
| 2341.225 | -4354 | 1.37E-04 | 1511 | 0.333333 | 3.320781 | 1076000 | HSPA6    |
| 2454.976 | -4354 | 1.37E-04 | 1461 | 0.333333 | 3.320781 | 1098590 | TRPV6    |
| 3183.084 | -4354 | 1.37E-04 | 1823 | 0.333333 | 3.320551 | 1160894 | PSMA1    |
| 2979.157 | -4354 | 1.37E-04 | 1603 | 0.333333 | 3.320551 | 1189234 | SLC25A4  |
| 2600.614 | -4354 | 1.37E-04 | 1563 | 0.333333 | 3.320551 | 1157470 | TPM3     |
| 2139.849 | -4354 | 1.37E-04 | 1553 | 0.333333 | 3.320551 | 1046682 | FST      |
| 3469.278 | -4354 | 1.37E-04 | 1511 | 0.333333 | 3.320551 | 1260506 | COQ10A   |
| 2619.872 | -4354 | 1.37E-04 | 1660 | 0.333333 | 3.320321 | 1163212 | GNG7     |
| 2861.845 | -4354 | 1.37E-04 | 1459 | 0.333333 | 3.320321 | 1140892 | RASAL1   |
| 2567.68  | -4354 | 1.37E-04 | 1729 | 0.333333 | 3.320092 | 1099912 | PLG      |
| 2514.736 | -4354 | 1.37E-04 | 1532 | 0.333333 | 3.320092 | 1128382 | GDF15    |
| 2430.741 | -4354 | 1.37E-04 | 1526 | 0.333333 | 3.320092 | 1086492 | MAP1LC3B |
| 2689.86  | -4354 | 1.37E-04 | 1507 | 0.333333 | 3.320092 | 1121958 | CFL1     |
| 2966.784 | -4354 | 1.37E-04 | 1733 | 0.333333 | 3.319862 | 1131378 | ADRA1D   |
| 2703.53  | -4354 | 1.37E-04 | 1653 | 0.333333 | 3.319862 | 1167028 | WWP2     |
| 3188.104 | -4354 | 1.37E-04 | 1629 | 0.333333 | 3.319862 | 1220764 | UBE2C    |
| 2940.097 | -4354 | 1.37E-04 | 1611 | 0.333333 | 3.319862 | 1191482 | SOCS7    |

|          |       |          |      |          |          |         |          |
|----------|-------|----------|------|----------|----------|---------|----------|
| 2873.587 | -4354 | 1.37E-04 | 1581 | 0.333333 | 3.319862 | 1150370 | MTM1     |
| 2551.419 | -4354 | 1.37E-04 | 1573 | 0.333333 | 3.319862 | 1134294 | EGLN1    |
| 2657.207 | -4354 | 1.37E-04 | 1448 | 0.333333 | 3.319862 | 1156808 | PARP3    |
| 2472.734 | -4354 | 1.37E-04 | 1694 | 0.333333 | 3.319633 | 1103690 | RUNX1T1  |
| 2559.935 | -4354 | 1.37E-04 | 1682 | 0.333333 | 3.319633 | 1117458 | SQSTM1   |
| 2551.005 | -4354 | 1.37E-04 | 1596 | 0.333333 | 3.319633 | 1097398 | CCND3    |
| 3161.071 | -4354 | 1.37E-04 | 1553 | 0.333333 | 3.319633 | 1172336 | TLR9     |
| 2381.195 | -4354 | 1.37E-04 | 1474 | 0.333333 | 3.319633 | 1118312 | SORT1    |
| 2231.138 | -4354 | 1.37E-04 | 1450 | 0.333333 | 3.319633 | 1080452 | HOMER3   |
| 3418.241 | -4354 | 1.37E-04 | 1620 | 0.333333 | 3.319403 | 1217528 | VHL      |
| 2585.953 | -4354 | 1.37E-04 | 1598 | 0.333333 | 3.319403 | 1101558 | WAS      |
| 2724.551 | -4354 | 1.37E-04 | 1581 | 0.333333 | 3.319403 | 1136070 | MAPK12   |
| 2764.869 | -4354 | 1.37E-04 | 1668 | 0.333333 | 3.319173 | 1141144 | ENAH     |
| 2968.117 | -4354 | 1.37E-04 | 1597 | 0.333333 | 3.319173 | 1119292 | STUB1    |
| 2852.384 | -4354 | 1.37E-04 | 1521 | 0.333333 | 3.319173 | 1140284 | ATG101   |
| 2653.267 | -4354 | 1.37E-04 | 1520 | 0.333333 | 3.319173 | 1133388 | LAPTM4B  |
| 2409.506 | -4354 | 1.37E-04 | 1507 | 0.333333 | 3.319173 | 1105320 | LIMK2    |
| 2445.435 | -4354 | 1.37E-04 | 1444 | 0.333333 | 3.319173 | 1094034 | IL36G    |
| 2640.09  | -4354 | 1.37E-04 | 1652 | 0.333333 | 3.318944 | 1112080 | KCNJ3    |
| 2040.25  | -4354 | 1.37E-04 | 1570 | 0.333333 | 3.318944 | 1037476 | CCN1     |
| 2841.892 | -4354 | 1.37E-04 | 1510 | 0.333333 | 3.318944 | 1118456 | MAPK8IP2 |
| 2967.339 | -4354 | 1.37E-04 | 1708 | 0.333333 | 3.318714 | 1197692 | MTOR     |
| 2812.995 | -4354 | 1.37E-04 | 1548 | 0.333333 | 3.318714 | 1138006 | PLXNB1   |
| 2834.634 | -4354 | 1.37E-04 | 1502 | 0.333333 | 3.318714 | 1166752 | LDHC     |
| 2469.382 | -4354 | 1.37E-04 | 1494 | 0.333333 | 3.318714 | 1070510 | NR5A1    |
| 2796.986 | -4354 | 1.37E-04 | 1814 | 0.333333 | 3.318485 | 1152124 | CASP8    |
| 2277.561 | -4354 | 1.37E-04 | 1770 | 0.333333 | 3.318485 | 1068608 | TEK      |
| 2468.178 | -4354 | 1.37E-04 | 1647 | 0.333333 | 3.318485 | 1059842 | ADH1B    |
| 2292.757 | -4354 | 1.37E-04 | 1478 | 0.333333 | 3.318485 | 1063506 | LILRB4   |
| 2304.196 | -4354 | 1.37E-04 | 1715 | 0.333333 | 3.318255 | 1053810 | FPR1     |
| 2930.531 | -4354 | 1.37E-04 | 1638 | 0.333333 | 3.318255 | 1166146 | SS18     |
| 3025.357 | -4354 | 1.37E-04 | 1503 | 0.333333 | 3.318255 | 1213440 | FABP3    |
| 2753.051 | -4354 | 1.37E-04 | 1856 | 0.333333 | 3.318025 | 1148340 | TRAF6    |
| 2729.845 | -4354 | 1.37E-04 | 1659 | 0.333333 | 3.318025 | 1100432 | GABBR2   |
| 2978.649 | -4354 | 1.37E-04 | 1532 | 0.333333 | 3.318025 | 1155688 | GSTT1    |
| 2742.073 | -4354 | 1.37E-04 | 1656 | 0.333333 | 3.317796 | 1139952 | HIPK1    |
| 2756.003 | -4354 | 1.37E-04 | 1633 | 0.333333 | 3.317796 | 1102180 | AQP4     |
| 2476.498 | -4354 | 1.37E-04 | 1651 | 0.333333 | 3.317566 | 1111478 | GNAL     |
| 3402.985 | -4354 | 1.37E-04 | 1638 | 0.333333 | 3.317336 | 1275138 | MEF2A    |
| 2839.797 | -4354 | 1.37E-04 | 1539 | 0.333333 | 3.317336 | 1147698 | INPP5F   |
| 2210.6   | -4354 | 1.37E-04 | 1477 | 0.333333 | 3.317336 | 1027784 | LILRB2   |



|          |       |          |      |          |          |         |          |
|----------|-------|----------|------|----------|----------|---------|----------|
| 2331.386 | -4354 | 1.37E-04 | 1427 | 0.333333 | 3.317336 | 1099474 | KLF3     |
| 2981.813 | -4354 | 1.37E-04 | 1904 | 0.333333 | 3.317107 | 1157210 | EP300    |
| 2687.655 | -4354 | 1.37E-04 | 1751 | 0.333333 | 3.316877 | 1109204 | PTEN     |
| 3125.397 | -4354 | 1.37E-04 | 1691 | 0.333333 | 3.316877 | 1162198 | CLTA     |
| 3169.029 | -4354 | 1.37E-04 | 1679 | 0.333333 | 3.316877 | 1145250 | BMP7     |
| 2722.231 | -4354 | 1.37E-04 | 1660 | 0.333333 | 3.316877 | 1136706 | HIPK3    |
| 3000.221 | -4354 | 1.37E-04 | 1644 | 0.333333 | 3.316877 | 1146574 | CSNK1G2  |
| 2595.569 | -4354 | 1.37E-04 | 1398 | 0.333333 | 3.316877 | 1078722 | FSCN2    |
| 3208.405 | -4354 | 1.37E-04 | 1525 | 0.333333 | 3.316648 | 1177084 | LATS1    |
| 2572.341 | -4354 | 1.37E-04 | 1510 | 0.333333 | 3.316648 | 1120592 | FADS2    |
| 2933.671 | -4354 | 1.36E-04 | 1697 | 0.333333 | 3.316418 | 1153332 | CDK9     |
| 2511.673 | -4354 | 1.36E-04 | 1607 | 0.333333 | 3.316418 | 1088100 | FGFR3    |
| 2292.222 | -4354 | 1.36E-04 | 1562 | 0.333333 | 3.316418 | 1090014 | FOSB     |
| 2097.629 | -4354 | 1.36E-04 | 1548 | 0.333333 | 3.316418 | 1030480 | TFPI     |
| 2641.145 | -4354 | 1.36E-04 | 1542 | 0.333333 | 3.316418 | 1099972 | CLIC5    |
| 3065.883 | -4354 | 1.36E-04 | 1524 | 0.333333 | 3.316418 | 1180560 | HESX1    |
| 2617.858 | -4354 | 1.36E-04 | 1571 | 0.333333 | 3.316188 | 1103188 | CA8      |
| 2566.67  | -4354 | 1.36E-04 | 1529 | 0.333333 | 3.316188 | 1024338 | HOXB1    |
| 2961.566 | -4354 | 1.36E-04 | 1482 | 0.333333 | 3.316188 | 1146940 | ITGAE    |
| 3743.976 | -4354 | 1.36E-04 | 1753 | 0.333333 | 3.315959 | 1164130 | ATP5F1A  |
| 3537.381 | -4354 | 1.36E-04 | 1662 | 0.333333 | 3.315959 | 1174148 | YWHAQ    |
| 2900.267 | -4354 | 1.36E-04 | 1862 | 0.333333 | 3.315729 | 1146168 | CSNK2A1  |
| 3046.156 | -4354 | 1.36E-04 | 1566 | 0.333333 | 3.315729 | 1144906 | RUVBL1   |
| 2426.918 | -4354 | 1.36E-04 | 1531 | 0.333333 | 3.315729 | 1076644 | FLOT2    |
| 2417.022 | -4354 | 1.36E-04 | 1482 | 0.333333 | 3.315729 | 1098924 | P2RX7    |
| 2785.126 | -4354 | 1.36E-04 | 1703 | 0.333333 | 3.315499 | 1109670 | PRKACA   |
| 3396.56  | -4354 | 1.36E-04 | 1638 | 0.333333 | 3.31527  | 1153340 | COX6B1   |
| 2080.194 | -4354 | 1.36E-04 | 1623 | 0.333333 | 3.31527  | 987642  | HLA-E    |
| 2816.849 | -4354 | 1.36E-04 | 1433 | 0.333333 | 3.31527  | 1117084 | CENPB    |
| 2268.808 | -4354 | 1.36E-04 | 1662 | 0.333333 | 3.31504  | 1066048 | EGR1     |
| 2456.78  | -4354 | 1.36E-04 | 1521 | 0.333333 | 3.31504  | 1080860 | IRF7     |
| 2630.678 | -4354 | 1.36E-04 | 1483 | 0.333333 | 3.31504  | 1122112 | TJP3     |
| 2758.142 | -4354 | 1.36E-04 | 1657 | 0.333333 | 3.314811 | 1127780 | SC5D     |
| 2273.576 | -4354 | 1.36E-04 | 1719 | 0.333333 | 3.314581 | 1030436 | AVPR1A   |
| 3041.675 | -4354 | 1.36E-04 | 1658 | 0.333333 | 3.314581 | 1141544 | GFPT1    |
| 2217.289 | -4354 | 1.36E-04 | 1633 | 0.333333 | 3.314581 | 1032930 | RHOQ     |
| 2838.306 | -4354 | 1.36E-04 | 1566 | 0.333333 | 3.314581 | 1148460 | TRAF5    |
| 2357.488 | -4354 | 1.36E-04 | 1543 | 0.333333 | 3.314581 | 1066882 | CA12     |
| 2488.594 | -4354 | 1.36E-04 | 1535 | 0.333333 | 3.314581 | 1080872 | FRMD6    |
| 2188.029 | -4354 | 1.36E-04 | 1490 | 0.333333 | 3.314581 | 1045174 | H6PD     |
| 2556.166 | -4354 | 1.36E-04 | 1467 | 0.333333 | 3.314581 | 1095818 | SLC39A14 |

|          |       |          |      |          |          |         |          |
|----------|-------|----------|------|----------|----------|---------|----------|
| 2799.782 | -4354 | 1.36E-04 | 1662 | 0.333333 | 3.314351 | 1105418 | B2M      |
| 2601.987 | -4354 | 1.36E-04 | 1617 | 0.333333 | 3.314351 | 1110112 | GNA13    |
| 2587.97  | -4354 | 1.36E-04 | 1478 | 0.333333 | 3.314351 | 1080396 | ACAA1    |
| 2678.252 | -4354 | 1.36E-04 | 1473 | 0.333333 | 3.314351 | 1039170 | NAGA     |
| 2958.684 | -4354 | 1.36E-04 | 1632 | 0.333333 | 3.314122 | 1131094 | ACAT1    |
| 2520.597 | -4354 | 1.36E-04 | 1592 | 0.333333 | 3.314122 | 1080434 | ZEB1     |
| 2596.986 | -4354 | 1.36E-04 | 1537 | 0.333333 | 3.314122 | 1105424 | NR4A2    |
| 2133.392 | -4354 | 1.36E-04 | 1527 | 0.333333 | 3.314122 | 1029310 | TGM2     |
| 3079.522 | -4354 | 1.36E-04 | 1761 | 0.333333 | 3.313892 | 1153536 | CLTC     |
| 2445.479 | -4354 | 1.36E-04 | 1584 | 0.333333 | 3.313892 | 1066200 | PDIA3    |
| 2591.585 | -4354 | 1.36E-04 | 1567 | 0.333333 | 3.313892 | 1077072 | IL1A     |
| 2174.708 | -4354 | 1.36E-04 | 1503 | 0.333333 | 3.313892 | 1041102 | GAS1     |
| 2470.513 | -4354 | 1.36E-04 | 1473 | 0.333333 | 3.313892 | 1068698 | RALGDS   |
| 2148.222 | -4354 | 1.36E-04 | 1468 | 0.333333 | 3.313892 | 1023578 | CSF2RA   |
| 2164.731 | -4354 | 1.36E-04 | 1580 | 0.333333 | 3.313662 | 1046150 | MYL9     |
| 2598.258 | -4354 | 1.36E-04 | 1579 | 0.333333 | 3.313662 | 1036952 | CHRM4    |
| 2686.399 | -4354 | 1.36E-04 | 1472 | 0.333333 | 3.313662 | 1119454 | LGR6     |
| 2811.499 | -4354 | 1.36E-04 | 1426 | 0.333333 | 3.313662 | 1142720 | RBKS     |
| 2521.32  | -4354 | 1.36E-04 | 1590 | 0.333333 | 3.313433 | 1092446 | SIPA1L2  |
| 2308.193 | -4354 | 1.36E-04 | 1420 | 0.333333 | 3.313433 | 1027544 | GAPDHS   |
| 2277.786 | -4354 | 1.36E-04 | 1725 | 0.333333 | 3.313203 | 1033248 | LAMA4    |
| 2262.688 | -4354 | 1.36E-04 | 1523 | 0.333333 | 3.313203 | 1052288 | SSH1     |
| 2473.644 | -4354 | 1.36E-04 | 1511 | 0.333333 | 3.313203 | 1056824 | ME2      |
| 2752.816 | -4354 | 1.36E-04 | 1491 | 0.333333 | 3.313203 | 1104264 | CCL4     |
| 3059.191 | -4354 | 1.36E-04 | 1520 | 0.333333 | 3.312974 | 1108470 | MAPKAPK5 |
| 2489.377 | -4354 | 1.36E-04 | 1506 | 0.333333 | 3.312974 | 1079028 | CD79B    |
| 2348.954 | -4354 | 1.36E-04 | 1425 | 0.333333 | 3.312974 | 1070538 | NPC1     |
| 2569.604 | -4354 | 1.36E-04 | 1605 | 0.333333 | 3.312744 | 1072266 | EPHA5    |
| 2504.569 | -4354 | 1.36E-04 | 1509 | 0.333333 | 3.312744 | 1021780 | IL5      |
| 3108.302 | -4354 | 1.36E-04 | 1499 | 0.333333 | 3.312744 | 1121934 | ANAPC2   |
| 2281.904 | -4354 | 1.36E-04 | 1497 | 0.333333 | 3.312744 | 1053984 | PDGFA    |
| 2307.41  | -4354 | 1.36E-04 | 1471 | 0.333333 | 3.312744 | 1036688 | SYN1     |
| 2757.797 | -4354 | 1.36E-04 | 1460 | 0.333333 | 3.312744 | 1050084 | PFKFB1   |
| 2722.027 | -4354 | 1.36E-04 | 1736 | 0.333333 | 3.312514 | 1099824 | PAK2     |
| 3102.679 | -4354 | 1.36E-04 | 1675 | 0.333333 | 3.312514 | 1087576 | PSMB5    |
| 3162.538 | -4354 | 1.36E-04 | 1808 | 0.333333 | 3.312285 | 1114592 | PSMA5    |
| 2347.291 | -4354 | 1.36E-04 | 1574 | 0.333333 | 3.312285 | 1070156 | PPP1R12B |
| 2629.161 | -4354 | 1.36E-04 | 1552 | 0.333333 | 3.312285 | 1060490 | UBA1     |
| 2039.598 | -4354 | 1.36E-04 | 1493 | 0.333333 | 3.312285 | 987996  | LAMC3    |
| 2635.6   | -4354 | 1.36E-04 | 1531 | 0.333333 | 3.312055 | 1095564 | UBE2Z    |
| 2653.23  | -4354 | 1.36E-04 | 1477 | 0.333333 | 3.312055 | 1109582 | SLC44A3  |

|          |       |          |      |          |          |         |          |
|----------|-------|----------|------|----------|----------|---------|----------|
| 2408.143 | -4354 | 1.36E-04 | 1430 | 0.333333 | 3.312055 | 1077698 | LAG3     |
| 2641.791 | -4354 | 1.36E-04 | 1420 | 0.333333 | 3.312055 | 1035582 | CYP8B1   |
| 2420.428 | -4354 | 1.36E-04 | 1416 | 0.333333 | 3.312055 | 1048732 | SGSH     |
| 2508.655 | -4354 | 1.36E-04 | 1527 | 0.333333 | 3.311825 | 1102368 | TNFRSF17 |
| 2403.887 | -4354 | 1.36E-04 | 1492 | 0.333333 | 3.311825 | 1032678 | LPAR6    |
| 2091.159 | -4354 | 1.36E-04 | 1432 | 0.333333 | 3.311825 | 982532  | SULT1E1  |
| 2246.67  | -4354 | 1.36E-04 | 1422 | 0.333333 | 3.311825 | 1012308 | ATP2A1   |
| 2611.389 | -4354 | 1.36E-04 | 1601 | 0.333333 | 3.311596 | 1080762 | SNAP23   |
| 2906.726 | -4354 | 1.36E-04 | 1568 | 0.333333 | 3.311596 | 1114148 | SIRT1    |
| 2203.296 | -4354 | 1.36E-04 | 1511 | 0.333333 | 3.311596 | 1020960 | ZFP36L2  |
| 2156.194 | -4354 | 1.36E-04 | 1426 | 0.333333 | 3.311596 | 1034664 | TLR6     |
| 2441.209 | -4354 | 1.36E-04 | 1811 | 0.333333 | 3.311366 | 1044466 | JAK2     |
| 2771.03  | -4354 | 1.36E-04 | 1658 | 0.333333 | 3.311366 | 1128884 | PATJ     |
| 2301.598 | -4354 | 1.36E-04 | 1526 | 0.333333 | 3.311366 | 1024662 | CFB      |
| 1985.686 | -4354 | 1.36E-04 | 1520 | 0.333333 | 3.311366 | 976008  | C7       |
| 2344.763 | -4354 | 1.36E-04 | 1474 | 0.333333 | 3.311366 | 1068556 | PCYT1A   |
| 2739.168 | -4354 | 1.36E-04 | 1721 | 0.333333 | 3.311137 | 1054838 | CAMK2A   |
| 2112.632 | -4354 | 1.36E-04 | 1559 | 0.333333 | 3.311137 | 999126  | PDE1A    |
| 2946.034 | -4354 | 1.36E-04 | 1487 | 0.333333 | 3.311137 | 1116302 | MAP1LC3A |
| 2403.618 | -4354 | 1.36E-04 | 1576 | 0.333333 | 3.310907 | 1070884 | IL16     |
| 2396.663 | -4354 | 1.36E-04 | 1493 | 0.333333 | 3.310907 | 1059388 | MTMR14   |
| 2281.549 | -4354 | 1.36E-04 | 1454 | 0.333333 | 3.310907 | 1038072 | EREG     |
| 2717.01  | -4354 | 1.36E-04 | 1682 | 0.333333 | 3.310677 | 1049800 | PSMD8    |
| 2325.541 | -4354 | 1.36E-04 | 1572 | 0.333333 | 3.310677 | 1028688 | POSTN    |
| 2355.047 | -4354 | 1.36E-04 | 1541 | 0.333333 | 3.310677 | 1039650 | PIK3AP1  |
| 2068.319 | -4354 | 1.36E-04 | 1531 | 0.333333 | 3.310677 | 1018980 | GRB10    |
| 2616.592 | -4354 | 1.36E-04 | 1453 | 0.333333 | 3.310677 | 1023826 | IL19     |
| 2514.793 | -4354 | 1.36E-04 | 1446 | 0.333333 | 3.310677 | 1056824 | DGKQ     |
| 3993.35  | -4354 | 1.36E-04 | 1659 | 0.333333 | 3.310448 | 1641448 | BCL2     |
| 2851.447 | -4354 | 1.36E-04 | 1608 | 0.333333 | 3.310448 | 1103480 | SPTAN1   |
| 2229.931 | -4354 | 1.36E-04 | 1546 | 0.333333 | 3.310448 | 1021780 | PTGER4   |
| 2694.96  | -4354 | 1.36E-04 | 1542 | 0.333333 | 3.310448 | 1059122 | SEC61A1  |
| 2485.137 | -4354 | 1.36E-04 | 1528 | 0.333333 | 3.310448 | 1029108 | INPP5D   |
| 2266.745 | -4354 | 1.36E-04 | 1513 | 0.333333 | 3.310448 | 1038566 | SEPTIN4  |
| 2613.616 | -4354 | 1.36E-04 | 1622 | 0.333333 | 3.310218 | 1086262 | TRAF3    |
| 2356.099 | -4354 | 1.36E-04 | 1520 | 0.333333 | 3.310218 | 1011946 | PGR      |
| 4010.432 | -4354 | 1.36E-04 | 1672 | 0.333333 | 3.309989 | 1188092 | NDUFA8   |
| 2694.661 | -4354 | 1.36E-04 | 1594 | 0.333333 | 3.309759 | 1123976 | SUPT3H   |
| 2669.581 | -4354 | 1.36E-04 | 1567 | 0.333333 | 3.309759 | 1090168 | GCLC     |
| 2319.202 | -4354 | 1.36E-04 | 1525 | 0.333333 | 3.309759 | 1017590 | PICALM   |
| 2656.05  | -4354 | 1.36E-04 | 1514 | 0.333333 | 3.309759 | 1090116 | GNGT2    |

|          |       |          |      |          |          |         |          |
|----------|-------|----------|------|----------|----------|---------|----------|
| 2415.134 | -4354 | 1.36E-04 | 1509 | 0.333333 | 3.309759 | 1047302 | GZMK     |
| 2014.92  | -4354 | 1.36E-04 | 1457 | 0.333333 | 3.309759 | 988704  | NOTCH4   |
| 2105.25  | -4354 | 1.36E-04 | 1452 | 0.333333 | 3.309759 | 1009042 | TLE3     |
| 2674.55  | -4354 | 1.36E-04 | 1573 | 0.333333 | 3.309529 | 1087164 | ACSL3    |
| 2320.748 | -4354 | 1.36E-04 | 1455 | 0.333333 | 3.309529 | 1037054 | PRF1     |
| 2120.182 | -4354 | 1.36E-04 | 1418 | 0.333333 | 3.309529 | 985270  | NLGN3    |
| 3549.256 | -4354 | 1.36E-04 | 1576 | 0.333333 | 3.3093   | 1138472 | CFTR     |
| 2683.191 | -4354 | 1.36E-04 | 1546 | 0.333333 | 3.3093   | 1096346 | SLC20A2  |
| 2541.899 | -4354 | 1.36E-04 | 1450 | 0.333333 | 3.3093   | 1026582 | LHX2     |
| 2745.18  | -4354 | 1.36E-04 | 1407 | 0.333333 | 3.3093   | 1089714 | BRD9     |
| 2743.239 | -4354 | 1.36E-04 | 1690 | 0.333333 | 3.30907  | 1097238 | ARNT     |
| 2877.722 | -4354 | 1.36E-04 | 1616 | 0.333333 | 3.30907  | 1047422 | PSMB6    |
| 2366.649 | -4354 | 1.36E-04 | 1541 | 0.333333 | 3.30907  | 1080526 | TRAF3IP2 |
| 2410.393 | -4354 | 1.36E-04 | 1485 | 0.333333 | 3.30907  | 1028400 | PLXNB2   |
| 2451.355 | -4354 | 1.36E-04 | 1398 | 0.333333 | 3.30907  | 1052024 | STARD3   |
| 2514.218 | -4354 | 1.36E-04 | 1387 | 0.333333 | 3.30907  | 1088352 | LRRC4    |
| 2466.937 | -4354 | 1.36E-04 | 1712 | 0.333333 | 3.30884  | 1027194 | GNAO1    |
| 2327.889 | -4354 | 1.36E-04 | 1488 | 0.333333 | 3.30884  | 1014668 | CYP2C18  |
| 2189.363 | -4354 | 1.36E-04 | 1478 | 0.333333 | 3.30884  | 1029372 | YBX3     |
| 2407.915 | -4354 | 1.36E-04 | 1360 | 0.333333 | 3.30884  | 1049344 | TCL1B    |
| 2403.423 | -4354 | 1.36E-04 | 1651 | 0.333333 | 3.308611 | 1035370 | IL6ST    |
| 2426.675 | -4354 | 1.36E-04 | 1640 | 0.333333 | 3.308611 | 1055768 | GAB1     |
| 2463.517 | -4354 | 1.36E-04 | 1476 | 0.333333 | 3.308611 | 1002670 | POU1F1   |
| 1965.709 | -4354 | 1.36E-04 | 1427 | 0.333333 | 3.308611 | 974412  | LILRA2   |
| 2379.245 | -4354 | 1.36E-04 | 1421 | 0.333333 | 3.308611 | 1029382 | DNASE2   |
| 2462.618 | -4354 | 1.36E-04 | 1575 | 0.333333 | 3.308381 | 1049744 | PTCH1    |
| 2421.047 | -4354 | 1.36E-04 | 1537 | 0.333333 | 3.308381 | 1026886 | CACNA1D  |
| 2325.841 | -4354 | 1.36E-04 | 1480 | 0.333333 | 3.308381 | 1020652 | GZMB     |
| 2218.769 | -4354 | 1.36E-04 | 1476 | 0.333333 | 3.308381 | 1028240 | EPHB4    |
| 2663.587 | -4354 | 1.36E-04 | 1550 | 0.333333 | 3.308152 | 1103740 | ELOA     |
| 2484.301 | -4354 | 1.36E-04 | 1525 | 0.333333 | 3.308152 | 1017272 | TGFB1    |
| 2672.564 | -4354 | 1.36E-04 | 1498 | 0.333333 | 3.308152 | 1059362 | ITPR3    |
| 2421.764 | -4354 | 1.36E-04 | 1453 | 0.333333 | 3.308152 | 1039040 | GALNS    |
| 2093.344 | -4354 | 1.36E-04 | 1595 | 0.333333 | 3.307922 | 1004500 | ITGB5    |
| 2359.865 | -4354 | 1.36E-04 | 1574 | 0.333333 | 3.307922 | 1002442 | MEOX2    |
| 2300.086 | -4354 | 1.36E-04 | 1486 | 0.333333 | 3.307922 | 1006848 | PLK3     |
| 2252.113 | -4354 | 1.36E-04 | 1458 | 0.333333 | 3.307922 | 976436  | PHKG1    |
| 1984.231 | -4354 | 1.36E-04 | 1417 | 0.333333 | 3.307922 | 971966  | SOX17    |
| 2065.779 | -4354 | 1.36E-04 | 1404 | 0.333333 | 3.307922 | 991604  | PHEX     |
| 2721.134 | -4354 | 1.36E-04 | 1627 | 0.333333 | 3.307692 | 1088944 | NEGR1    |
| 3201.03  | -4354 | 1.36E-04 | 1612 | 0.333333 | 3.307692 | 1133474 | ARF1     |

|          |       |          |      |          |          |         |          |
|----------|-------|----------|------|----------|----------|---------|----------|
| 2571.884 | -4354 | 1.36E-04 | 1576 | 0.333333 | 3.307692 | 1063882 | PPP2CB   |
| 2344.539 | -4354 | 1.36E-04 | 1393 | 0.333333 | 3.307692 | 1027656 | SLC44A2  |
| 2128.243 | -4354 | 1.36E-04 | 1672 | 0.333333 | 3.307463 | 996892  | ITGB3    |
| 2359.635 | -4354 | 1.36E-04 | 1659 | 0.333333 | 3.307463 | 1002934 | CRK      |
| 2216.456 | -4354 | 1.36E-04 | 1605 | 0.333333 | 3.307463 | 1016218 | BMP6     |
| 2294.842 | -4354 | 1.36E-04 | 1531 | 0.333333 | 3.307463 | 1041972 | TOLLIP   |
| 2989.382 | -4354 | 1.36E-04 | 1463 | 0.333333 | 3.307463 | 1071558 | GUSB     |
| 2385.199 | -4354 | 1.36E-04 | 1440 | 0.333333 | 3.307463 | 1020080 | GNAT2    |
| 2739.112 | -4354 | 1.36E-04 | 1579 | 0.333333 | 3.307233 | 1098746 | WWOX     |
| 2457.925 | -4354 | 1.36E-04 | 1538 | 0.333333 | 3.307233 | 1034918 | RALA     |
| 2034.771 | -4354 | 1.36E-04 | 1452 | 0.333333 | 3.307003 | 939276  | SFRP4    |
| 2224.889 | -4354 | 1.36E-04 | 1445 | 0.333333 | 3.307003 | 981864  | TNFSF13B |
| 2677.853 | -4354 | 1.36E-04 | 1556 | 0.333333 | 3.306774 | 1075796 | ATP6V1H  |
| 2306.957 | -4354 | 1.36E-04 | 1537 | 0.333333 | 3.306774 | 1046778 | PSEN2    |
| 2094.829 | -4354 | 1.36E-04 | 1399 | 0.333333 | 3.306774 | 981278  | ALDH3B1  |
| 2386.352 | -4354 | 1.36E-04 | 1394 | 0.333333 | 3.306774 | 1047228 | TBL1Y    |
| 2472.516 | -4354 | 1.36E-04 | 1543 | 0.333333 | 3.306315 | 1029128 | BACH1    |
| 2451.986 | -4354 | 1.36E-04 | 1487 | 0.333333 | 3.306315 | 1033972 | CCL18    |
| 2431.114 | -4354 | 1.36E-04 | 1477 | 0.333333 | 3.306315 | 977914  | POU3F2   |
| 2452.971 | -4354 | 1.36E-04 | 1348 | 0.333333 | 3.306315 | 993266  | NOTUM    |
| 3435.88  | -4354 | 1.36E-04 | 1453 | 0.333333 | 3.306085 | 1163968 | TTI1     |
| 2862.215 | -4354 | 1.36E-04 | 1422 | 0.333333 | 3.306085 | 1056912 | GLRX2    |
| 2922.965 | -4354 | 1.36E-04 | 1381 | 0.333333 | 3.306085 | 1111162 | HSD17B8  |
| 2679.46  | -4354 | 1.36E-04 | 1620 | 0.333333 | 3.305855 | 1076024 | SMURF1   |
| 2730.519 | -4354 | 1.36E-04 | 1568 | 0.333333 | 3.305855 | 1037530 | CD47     |
| 2614.674 | -4354 | 1.36E-04 | 1497 | 0.333333 | 3.305855 | 1041228 | PGF      |
| 2503.284 | -4354 | 1.36E-04 | 1474 | 0.333333 | 3.305855 | 1040152 | SLC2A5   |
| 2120.954 | -4354 | 1.36E-04 | 1463 | 0.333333 | 3.305855 | 994848  | NRXN2    |
| 2881.615 | -4354 | 1.36E-04 | 1601 | 0.333333 | 3.305626 | 1074010 | PKM      |
| 3215.503 | -4354 | 1.36E-04 | 1539 | 0.333333 | 3.305626 | 1133406 | PPIP5K1  |
| 2045.814 | -4354 | 1.36E-04 | 1483 | 0.333333 | 3.305626 | 950786  | COL2A1   |
| 2273.297 | -4354 | 1.36E-04 | 1465 | 0.333333 | 3.305626 | 991184  | ERO1A    |
| 2160.351 | -4354 | 1.36E-04 | 1430 | 0.333333 | 3.305626 | 961238  | SH3GLB1  |
| 2361.574 | -4354 | 1.36E-04 | 1623 | 0.333333 | 3.305396 | 992894  | PTPRC    |
| 2161.732 | -4354 | 1.36E-04 | 1568 | 0.333333 | 3.305396 | 975096  | TRPC6    |
| 2902.857 | -4354 | 1.36E-04 | 1559 | 0.333333 | 3.305396 | 1122272 | STX17    |
| 2774.793 | -4354 | 1.36E-04 | 1487 | 0.333333 | 3.305396 | 1039302 | CSMD3    |
| 2699.62  | -4354 | 1.36E-04 | 1588 | 0.333333 | 3.305166 | 1089724 | HUWE1    |
| 2436.504 | -4354 | 1.36E-04 | 1568 | 0.333333 | 3.305166 | 985354  | ATP6V1A  |
| 2637.717 | -4354 | 1.36E-04 | 1514 | 0.333333 | 3.305166 | 1059980 | GRHPR    |
| 2651.17  | -4354 | 1.36E-04 | 1496 | 0.333333 | 3.305166 | 1041968 | MLST8    |

|          |       |          |      |          |          |         |          |
|----------|-------|----------|------|----------|----------|---------|----------|
| 2454.451 | -4354 | 1.36E-04 | 1413 | 0.333333 | 3.305166 | 1011516 | SHISA5   |
| 2152.798 | -4354 | 1.36E-04 | 1398 | 0.333333 | 3.305166 | 997698  | PYGB     |
| 2105.031 | -4354 | 1.36E-04 | 1598 | 0.333333 | 3.304937 | 1002278 | FGFR1    |
| 2500.795 | -4354 | 1.36E-04 | 1545 | 0.333333 | 3.304937 | 1050310 | ALDH7A1  |
| 2374.838 | -4354 | 1.36E-04 | 1534 | 0.333333 | 3.304937 | 1005608 | LMNA     |
| 2215.704 | -4354 | 1.36E-04 | 1513 | 0.333333 | 3.304937 | 982088  | STX4     |
| 2236.414 | -4354 | 1.36E-04 | 1509 | 0.333333 | 3.304937 | 1005744 | NR4A3    |
| 2463.312 | -4354 | 1.36E-04 | 1494 | 0.333333 | 3.304937 | 1045354 | OLIG1    |
| 2070.728 | -4354 | 1.36E-04 | 1478 | 0.333333 | 3.304937 | 955232  | NFE2L2   |
| 2157.422 | -4354 | 1.36E-04 | 1639 | 0.333333 | 3.304707 | 983346  | CNR1     |
| 4075.333 | -4354 | 1.36E-04 | 1570 | 0.333333 | 3.304707 | 1578122 | AMBRA1   |
| 2519.92  | -4354 | 1.36E-04 | 1648 | 0.333333 | 3.304478 | 1023694 | GRIN2B   |
| 2325.169 | -4354 | 1.36E-04 | 1489 | 0.333333 | 3.304478 | 955016  | KCNJ9    |
| 2061.779 | -4354 | 1.36E-04 | 1442 | 0.333333 | 3.304478 | 963638  | IL17RA   |
| 2281.408 | -4354 | 1.36E-04 | 1431 | 0.333333 | 3.304478 | 993838  | LGR5     |
| 2478.911 | -4354 | 1.36E-04 | 1424 | 0.333333 | 3.304478 | 1047124 | PPP3CC   |
| 3249.631 | -4354 | 1.36E-04 | 1730 | 0.333333 | 3.304248 | 1050006 | DLD      |
| 2718.388 | -4354 | 1.36E-04 | 1573 | 0.333333 | 3.304248 | 1049470 | BAX      |
| 2577.145 | -4354 | 1.36E-04 | 1573 | 0.333333 | 3.304248 | 1010996 | MAPK11   |
| 2364.398 | -4354 | 1.36E-04 | 1541 | 0.333333 | 3.304248 | 1023268 | CAMKK2   |
| 2751.379 | -4354 | 1.36E-04 | 1407 | 0.333333 | 3.304248 | 1067788 | PRXL2B   |
| 2319.279 | -4354 | 1.35E-04 | 1602 | 0.333333 | 3.304018 | 988116  | HSPA5    |
| 2240.654 | -4354 | 1.35E-04 | 1440 | 0.333333 | 3.304018 | 987572  | CTSZ     |
| 2410.247 | -4354 | 1.35E-04 | 1426 | 0.333333 | 3.304018 | 1017224 | DAPP1    |
| 2420.589 | -4354 | 1.35E-04 | 1683 | 0.333333 | 3.303789 | 1003676 | PARVA    |
| 2226.162 | -4354 | 1.35E-04 | 1617 | 0.333333 | 3.303789 | 983834  | ADCY2    |
| 2283.492 | -4354 | 1.35E-04 | 1468 | 0.333333 | 3.303789 | 981734  | NOS3     |
| 3306.352 | -4354 | 1.35E-04 | 1443 | 0.333333 | 3.303789 | 1104592 | RBP2     |
| 2666.733 | -4354 | 1.35E-04 | 1559 | 0.333333 | 3.303559 | 1051836 | EXOC2    |
| 2445.613 | -4354 | 1.35E-04 | 1544 | 0.333333 | 3.303559 | 1029630 | E2F3     |
| 2031.293 | -4354 | 1.35E-04 | 1524 | 0.333333 | 3.303559 | 979120  | OLFM1    |
| 1996.226 | -4354 | 1.35E-04 | 1520 | 0.333333 | 3.303559 | 945500  | IGF1     |
| 2147.831 | -4354 | 1.35E-04 | 1449 | 0.333333 | 3.303559 | 981048  | SERPINB5 |
| 2485.542 | -4354 | 1.35E-04 | 1438 | 0.333333 | 3.303559 | 1033752 | MGST3    |
| 2366.162 | -4354 | 1.35E-04 | 1430 | 0.333333 | 3.303559 | 1018472 | DOT1L    |
| 2263.57  | -4354 | 1.35E-04 | 1469 | 0.333333 | 3.30333  | 1024078 | HIPK2    |
| 2973.896 | -4354 | 1.35E-04 | 1385 | 0.333333 | 3.30333  | 1131360 | HSD17B7  |
| 2668.93  | -4354 | 1.35E-04 | 1582 | 0.333333 | 3.3031   | 1063086 | WEE1     |
| 2669.458 | -4354 | 1.35E-04 | 1579 | 0.333333 | 3.3031   | 1056092 | PHKB     |
| 2693.222 | -4354 | 1.35E-04 | 1536 | 0.333333 | 3.3031   | 1044264 | STK3     |
| 2346.631 | -4354 | 1.35E-04 | 1436 | 0.333333 | 3.3031   | 1023702 | SLC37A2  |

|          |       |          |      |          |          |         |         |
|----------|-------|----------|------|----------|----------|---------|---------|
| 2236.218 | -4354 | 1.35E-04 | 1412 | 0.333333 | 3.3031   | 976494  | ELOVL2  |
| 2570.053 | -4354 | 1.35E-04 | 1621 | 0.333333 | 3.30287  | 1023718 | CCL5    |
| 2730.569 | -4354 | 1.35E-04 | 1557 | 0.333333 | 3.30287  | 1073528 | PDCD4   |
| 2455.064 | -4354 | 1.35E-04 | 1402 | 0.333333 | 3.30287  | 1019570 | WDR45   |
| 2613.445 | -4354 | 1.35E-04 | 1387 | 0.333333 | 3.30287  | 1026928 | PIP4P2  |
| 2631.147 | -4354 | 1.35E-04 | 1376 | 0.333333 | 3.30287  | 1026176 | SIRT6   |
| 2501.256 | -4354 | 1.35E-04 | 1605 | 0.333333 | 3.302641 | 1028140 | BMPR2   |
| 3222.934 | -4354 | 1.35E-04 | 1571 | 0.333333 | 3.302641 | 1064226 | COX5A   |
| 2073.25  | -4354 | 1.35E-04 | 1473 | 0.333333 | 3.302641 | 989082  | RGS3    |
| 2128.701 | -4354 | 1.35E-04 | 1450 | 0.333333 | 3.302641 | 927260  | CACNA1B |
| 2701.428 | -4354 | 1.35E-04 | 1438 | 0.333333 | 3.302641 | 1052152 | SPHK2   |
| 2228.117 | -4354 | 1.35E-04 | 1424 | 0.333333 | 3.302641 | 992922  | DLL4    |
| 2256.461 | -4354 | 1.35E-04 | 1391 | 0.333333 | 3.302641 | 1021430 | IL11RA  |
| 3022.112 | -4354 | 1.35E-04 | 1336 | 0.333333 | 3.302641 | 1041198 | RASAL3  |
| 2776.951 | -4354 | 1.35E-04 | 1623 | 0.333333 | 3.302411 | 1089596 | MDM4    |
| 3573.657 | -4354 | 1.35E-04 | 1593 | 0.333333 | 3.302411 | 1104156 | NDUFAB1 |
| 2496.873 | -4354 | 1.35E-04 | 1592 | 0.333333 | 3.302411 | 1035442 | PIAS1   |
| 2053.621 | -4354 | 1.35E-04 | 1397 | 0.333333 | 3.302411 | 941366  | TLR8    |
| 2326.277 | -4354 | 1.35E-04 | 1492 | 0.333333 | 3.302181 | 954144  | XCR1    |
| 2669.922 | -4354 | 1.35E-04 | 1652 | 0.333333 | 3.301952 | 1048366 | FBXW11  |
| 2736.08  | -4354 | 1.35E-04 | 1383 | 0.333333 | 3.301952 | 1061484 | ACAT2   |
| 2751.778 | -4354 | 1.35E-04 | 1511 | 0.333333 | 3.301722 | 1056104 | PPP3R1  |
| 2345.528 | -4354 | 1.35E-04 | 1481 | 0.333333 | 3.301722 | 980078  | SHH     |
| 2527.65  | -4354 | 1.35E-04 | 1457 | 0.333333 | 3.301722 | 991754  | CACNG2  |
| 2092.589 | -4354 | 1.35E-04 | 1418 | 0.333333 | 3.301722 | 948766  | PDLIM4  |
| 2194.173 | -4354 | 1.35E-04 | 1397 | 0.333333 | 3.301722 | 944804  | GRIN2D  |
| 2747.654 | -4354 | 1.35E-04 | 1356 | 0.333333 | 3.301722 | 1047254 | SAT2    |
| 2391.784 | -4354 | 1.35E-04 | 1339 | 0.333333 | 3.301722 | 929616  | LDHAL6B |
| 2701.589 | -4354 | 1.35E-04 | 1646 | 0.333333 | 3.301493 | 1067676 | BTRC    |
| 2809.866 | -4354 | 1.35E-04 | 1636 | 0.333333 | 3.301493 | 1042974 | SNW1    |
| 2165.94  | -4354 | 1.35E-04 | 1617 | 0.333333 | 3.301493 | 992622  | RARA    |
| 2055.392 | -4354 | 1.35E-04 | 1504 | 0.333333 | 3.301493 | 944320  | ANGPT1  |
| 2340.747 | -4354 | 1.35E-04 | 1492 | 0.333333 | 3.301493 | 939920  | SLC17A7 |
| 2439.96  | -4354 | 1.35E-04 | 1451 | 0.333333 | 3.301493 | 1008258 | GSTM1   |
| 2548.27  | -4354 | 1.35E-04 | 1410 | 0.333333 | 3.301493 | 1041854 | CDKN2C  |
| 2291.342 | -4354 | 1.35E-04 | 1399 | 0.333333 | 3.301493 | 911580  | ANGPTL3 |
| 2150.418 | -4354 | 1.35E-04 | 1389 | 0.333333 | 3.301493 | 934530  | GDF9    |
| 2543.218 | -4354 | 1.35E-04 | 1573 | 0.333333 | 3.301263 | 1044060 | TRIM32  |
| 2211.241 | -4354 | 1.35E-04 | 1492 | 0.333333 | 3.301263 | 981210  | PRLR    |
| 2640.962 | -4354 | 1.35E-04 | 1372 | 0.333333 | 3.301263 | 1007696 | DGAT2   |
| 2055.579 | -4354 | 1.35E-04 | 1512 | 0.333333 | 3.301033 | 925988  | G6PC    |

|          |       |          |      |          |          |         |           |
|----------|-------|----------|------|----------|----------|---------|-----------|
| 2074.208 | -4354 | 1.35E-04 | 1442 | 0.333333 | 3.301033 | 962782  | HEY2      |
| 2267.624 | -4354 | 1.35E-04 | 1409 | 0.333333 | 3.301033 | 981802  | MICALL2   |
| 2613.77  | -4354 | 1.35E-04 | 1394 | 0.333333 | 3.301033 | 995204  | UBA3      |
| 2642.301 | -4354 | 1.35E-04 | 1557 | 0.333333 | 3.300804 | 1052770 | PRMT2     |
| 2167.437 | -4354 | 1.35E-04 | 1537 | 0.333333 | 3.300804 | 982910  | ETV1      |
| 2338.441 | -4354 | 1.35E-04 | 1468 | 0.333333 | 3.300804 | 1030552 | PHLPP1    |
| 2230.738 | -4354 | 1.35E-04 | 1446 | 0.333333 | 3.300804 | 975844  | RNF130    |
| 2148.335 | -4354 | 1.35E-04 | 1494 | 0.333333 | 3.300574 | 961962  | NEFM      |
| 2500.512 | -4354 | 1.35E-04 | 1480 | 0.333333 | 3.300574 | 1029678 | CXCL10    |
| 2222     | -4354 | 1.35E-04 | 1414 | 0.333333 | 3.300574 | 987462  | ELL2      |
| 2589.026 | -4354 | 1.35E-04 | 1381 | 0.333333 | 3.300574 | 940062  | MOGAT2    |
| 2582.738 | -4354 | 1.35E-04 | 1373 | 0.333333 | 3.300574 | 1019964 | SHARPIN   |
| 2570.072 | -4354 | 1.35E-04 | 1607 | 0.333333 | 3.300344 | 994796  | GNAI3     |
| 3202.026 | -4354 | 1.35E-04 | 1559 | 0.333333 | 3.300344 | 1274940 | CCR2      |
| 2521.349 | -4354 | 1.35E-04 | 1484 | 0.333333 | 3.300344 | 1016696 | ACACB     |
| 3062.267 | -4354 | 1.35E-04 | 1469 | 0.333333 | 3.300344 | 1025904 | COX7A2L   |
| 2760.62  | -4354 | 1.35E-04 | 1405 | 0.333333 | 3.300344 | 1025504 | HYAL3     |
| 2397.26  | -4354 | 1.35E-04 | 1591 | 0.333333 | 3.300115 | 1020942 | GNAS      |
| 1840.14  | -4354 | 1.35E-04 | 1590 | 0.333333 | 3.300115 | 887120  | ITGB2     |
| 2332.424 | -4354 | 1.35E-04 | 1505 | 0.333333 | 3.300115 | 985956  | NFKBIZ    |
| 2652.239 | -4354 | 1.35E-04 | 1536 | 0.333333 | 3.299885 | 1048244 | ACVR2B    |
| 2282.194 | -4354 | 1.35E-04 | 1523 | 0.333333 | 3.299885 | 1000272 | ARHGEF11  |
| 10739.08 | -4354 | 1.35E-04 | 1762 | 0.333333 | 3.299656 | 3358814 | RAC1      |
| 2234.729 | -4354 | 1.35E-04 | 1650 | 0.333333 | 3.299656 | 945186  | ADRA1A    |
| 2695.732 | -4354 | 1.35E-04 | 1583 | 0.333333 | 3.299656 | 1052030 | E2F1      |
| 1970.847 | -4354 | 1.35E-04 | 1466 | 0.333333 | 3.299656 | 919284  | RHOC      |
| 2403.402 | -4354 | 1.35E-04 | 1398 | 0.333333 | 3.299656 | 939794  | IFNA8     |
| 2433.37  | -4354 | 1.35E-04 | 1548 | 0.333333 | 3.299426 | 1008920 | MAP3K2    |
| 2557.732 | -4354 | 1.35E-04 | 1514 | 0.333333 | 3.299426 | 1048650 | MYB       |
| 2378.645 | -4354 | 1.35E-04 | 1467 | 0.333333 | 3.299426 | 988156  | EPHA1     |
| 2686.516 | -4354 | 1.35E-04 | 1465 | 0.333333 | 3.299426 | 1045376 | PHKA2     |
| 2399.263 | -4354 | 1.35E-04 | 1385 | 0.333333 | 3.299426 | 994788  | ARPC5L    |
| 3251.658 | -4354 | 1.35E-04 | 1367 | 0.333333 | 3.299426 | 1109332 | CLDN15    |
| 2487.945 | -4354 | 1.35E-04 | 1333 | 0.333333 | 3.299426 | 966932  | GGT1      |
| 2102.823 | -4354 | 1.35E-04 | 1512 | 0.333333 | 3.299196 | 939940  | NFASC     |
| 2119.628 | -4354 | 1.35E-04 | 1489 | 0.333333 | 3.299196 | 917996  | HLA-G     |
| 1956.197 | -4354 | 1.35E-04 | 1368 | 0.333333 | 3.299196 | 936764  | TNFRSF10C |
| 2481.778 | -4354 | 1.35E-04 | 1580 | 0.333333 | 3.298967 | 1008386 | E2F4      |
| 2343.476 | -4354 | 1.35E-04 | 1533 | 0.333333 | 3.298967 | 995950  | GLIS3     |
| 3138.894 | -4354 | 1.35E-04 | 1458 | 0.333333 | 3.298967 | 1102656 | CREB3L4   |
| 2197.171 | -4354 | 1.35E-04 | 1454 | 0.333333 | 3.298967 | 956704  | ZIC1      |



|          |       |          |      |          |          |         |          |
|----------|-------|----------|------|----------|----------|---------|----------|
| 2407.675 | -4354 | 1.35E-04 | 1433 | 0.333333 | 3.298967 | 1027822 | DNMT3A   |
| 2490.151 | -4354 | 1.35E-04 | 1380 | 0.333333 | 3.298967 | 996328  | ORAI1    |
| 2293.589 | -4354 | 1.35E-04 | 1588 | 0.333333 | 3.298737 | 990306  | ATP2A2   |
| 2459.744 | -4354 | 1.35E-04 | 1518 | 0.333333 | 3.298737 | 995218  | AP1G1    |
| 2457.71  | -4354 | 1.35E-04 | 1431 | 0.333333 | 3.298737 | 1015436 | TRAF4    |
| 2555.434 | -4354 | 1.35E-04 | 1419 | 0.333333 | 3.298737 | 969632  | WNT16    |
| 1846.195 | -4354 | 1.35E-04 | 1360 | 0.333333 | 3.298737 | 871928  | SLC5A7   |
| 2190.302 | -4354 | 1.35E-04 | 1335 | 0.333333 | 3.298737 | 985350  | NTNG2    |
| 2313.561 | -4354 | 1.35E-04 | 1329 | 0.333333 | 3.298737 | 1013490 | TGIF2    |
| 1971.408 | -4354 | 1.35E-04 | 1558 | 0.333333 | 3.298507 | 927974  | IGFBP5   |
| 2341.522 | -4354 | 1.35E-04 | 1432 | 0.333333 | 3.298507 | 950256  | CALB1    |
| 1966.563 | -4354 | 1.35E-04 | 1425 | 0.333333 | 3.298507 | 891936  | LPA      |
| 2096.365 | -4354 | 1.35E-04 | 1401 | 0.333333 | 3.298507 | 939462  | MALT1    |
| 2376.104 | -4354 | 1.35E-04 | 1488 | 0.333333 | 3.298278 | 1010482 | ACOX3    |
| 1972.999 | -4354 | 1.35E-04 | 1467 | 0.333333 | 3.298278 | 914172  | PAK3     |
| 2141.204 | -4354 | 1.35E-04 | 1464 | 0.333333 | 3.298278 | 937244  | AP1S2    |
| 2343.391 | -4354 | 1.35E-04 | 1448 | 0.333333 | 3.298278 | 988598  | PDE8A    |
| 2095.046 | -4354 | 1.35E-04 | 1415 | 0.333333 | 3.298278 | 920436  | IFNA1    |
| 2241.299 | -4354 | 1.35E-04 | 1461 | 0.333333 | 3.298048 | 972110  | ATG7     |
| 2689.193 | -4354 | 1.35E-04 | 1458 | 0.333333 | 3.298048 | 1001778 | CKS1B    |
| 2842.904 | -4354 | 1.35E-04 | 1366 | 0.333333 | 3.298048 | 1005602 | CACNG7   |
| 1933.201 | -4354 | 1.35E-04 | 1329 | 0.333333 | 3.298048 | 890216  | LCE2B    |
| 2170.28  | -4354 | 1.35E-04 | 1622 | 0.333333 | 3.297819 | 951094  | CXCR3    |
| 2162.576 | -4354 | 1.35E-04 | 1551 | 0.333333 | 3.297819 | 953514  | SOCS1    |
| 2096.29  | -4354 | 1.35E-04 | 1494 | 0.333333 | 3.297819 | 953182  | IL12RB1  |
| 2677.014 | -4354 | 1.35E-04 | 1458 | 0.333333 | 3.297819 | 1049176 | FBXO25   |
| 3007.649 | -4354 | 1.35E-04 | 1506 | 0.333333 | 3.297589 | 1056410 | COX7A2   |
| 2589.947 | -4354 | 1.35E-04 | 1471 | 0.333333 | 3.297589 | 1004616 | TNFRSF25 |
| 2636.134 | -4354 | 1.35E-04 | 1425 | 0.333333 | 3.297589 | 988902  | TUBB1    |
| 2652.142 | -4354 | 1.35E-04 | 1403 | 0.333333 | 3.297589 | 1011344 | NELFCD   |
| 2288.775 | -4354 | 1.35E-04 | 1373 | 0.333333 | 3.297589 | 969044  | CCL8     |
| 2248.19  | -4354 | 1.35E-04 | 1334 | 0.333333 | 3.297589 | 973342  | KDM6B    |
| 2291.283 | -4354 | 1.35E-04 | 1519 | 0.333333 | 3.297359 | 972906  | HDAC5    |
| 2612.067 | -4354 | 1.35E-04 | 1493 | 0.333333 | 3.297359 | 1032946 | CASP6    |
| 2191.087 | -4354 | 1.35E-04 | 1404 | 0.333333 | 3.297359 | 986206  | SESN2    |
| 2621.7   | -4354 | 1.35E-04 | 1611 | 0.333333 | 3.29713  | 995036  | UBE2E1   |
| 2280.482 | -4354 | 1.35E-04 | 1504 | 0.333333 | 3.29713  | 998854  | NF2      |
| 2214.433 | -4354 | 1.35E-04 | 1459 | 0.333333 | 3.29713  | 983936  | TBL1X    |
| 2509.142 | -4354 | 1.35E-04 | 1454 | 0.333333 | 3.29713  | 967912  | SUCLA2   |
| 2440.522 | -4354 | 1.35E-04 | 1401 | 0.333333 | 3.29713  | 983484  | GNPTG    |
| 2825.156 | -4354 | 1.35E-04 | 1670 | 0.333333 | 3.2969   | 1037982 | UBE3A    |

|          |       |          |      |          |          |         |         |
|----------|-------|----------|------|----------|----------|---------|---------|
| 1959.591 | -4354 | 1.35E-04 | 1439 | 0.333333 | 3.2969   | 916496  | HSPG2   |
| 2188.226 | -4354 | 1.35E-04 | 1410 | 0.333333 | 3.2969   | 918776  | CA6     |
| 2455.165 | -4354 | 1.35E-04 | 1495 | 0.333333 | 3.29667  | 996522  | PHKG2   |
| 2204.236 | -4354 | 1.35E-04 | 1438 | 0.333333 | 3.29667  | 960672  | CYSLTR1 |
| 3006.251 | -4354 | 1.35E-04 | 1710 | 0.333333 | 3.296441 | 1029748 | KRAS    |
| 2218.984 | -4354 | 1.35E-04 | 1529 | 0.333333 | 3.296441 | 977532  | SYNJ1   |
| 2172.804 | -4354 | 1.35E-04 | 1413 | 0.333333 | 3.296441 | 987584  | BCL2L11 |
| 3061.488 | -4354 | 1.35E-04 | 1388 | 0.333333 | 3.296441 | 1209486 | CHMP1B  |
| 2777.332 | -4354 | 1.35E-04 | 1366 | 0.333333 | 3.296441 | 1045832 | INPP5E  |
| 2198.464 | -4354 | 1.35E-04 | 1355 | 0.333333 | 3.296441 | 975042  | TCL1A   |
| 2664.793 | -4354 | 1.35E-04 | 1626 | 0.333333 | 3.296211 | 1022470 | DLG1    |
| 2832.492 | -4354 | 1.35E-04 | 1478 | 0.333333 | 3.296211 | 1012512 | RASA2   |
| 2296.387 | -4354 | 1.35E-04 | 1421 | 0.333333 | 3.296211 | 988064  | ALDH1B1 |
| 2667.527 | -4354 | 1.35E-04 | 1595 | 0.333333 | 3.295982 | 1016216 | PPP2R5C |
| 2465.36  | -4354 | 1.35E-04 | 1562 | 0.333333 | 3.295982 | 965692  | BCR     |
| 2487.438 | -4354 | 1.35E-04 | 1484 | 0.333333 | 3.295982 | 991584  | RRM2B   |
| 2132.235 | -4354 | 1.35E-04 | 1461 | 0.333333 | 3.295982 | 910800  | IMPG2   |
| 2296.389 | -4354 | 1.35E-04 | 1449 | 0.333333 | 3.295982 | 975366  | SOCS6   |
| 2241.109 | -4354 | 1.35E-04 | 1423 | 0.333333 | 3.295982 | 966360  | AGAP2   |
| 2226.26  | -4354 | 1.35E-04 | 1419 | 0.333333 | 3.295982 | 954372  | ASIC1   |
| 2143.089 | -4354 | 1.35E-04 | 1413 | 0.333333 | 3.295982 | 968984  | ATP2A3  |
| 2346.688 | -4354 | 1.35E-04 | 1398 | 0.333333 | 3.295982 | 984534  | SEMA4C  |
| 2245.22  | -4354 | 1.35E-04 | 1361 | 0.333333 | 3.295982 | 911270  | CACNG5  |
| 2594.114 | -4354 | 1.35E-04 | 1329 | 0.333333 | 3.295982 | 989252  | PIP4P1  |
| 2047.502 | -4354 | 1.35E-04 | 1321 | 0.333333 | 3.295982 | 938422  | MLLT1   |
| 2442.403 | -4354 | 1.35E-04 | 1591 | 0.333333 | 3.295752 | 992222  | NCOA3   |
| 2014.663 | -4354 | 1.35E-04 | 1531 | 0.333333 | 3.295752 | 918490  | PLCB2   |
| 1884.24  | -4354 | 1.35E-04 | 1517 | 0.333333 | 3.295752 | 910496  | ACTA2   |
| 3108.65  | -4354 | 1.35E-04 | 1482 | 0.333333 | 3.295752 | 1084084 | CLDN2   |
| 2887.218 | -4354 | 1.35E-04 | 1447 | 0.333333 | 3.295752 | 1021876 | PLCD4   |
| 2245.265 | -4354 | 1.35E-04 | 1349 | 0.333333 | 3.295752 | 955302  | ACOT7   |
| 2592.778 | -4354 | 1.35E-04 | 1498 | 0.333333 | 3.295522 | 1030472 | PIP5K1A |
| 2187.316 | -4354 | 1.35E-04 | 1477 | 0.333333 | 3.295293 | 966074  | MLLT3   |
| 2160.172 | -4354 | 1.35E-04 | 1376 | 0.333333 | 3.295293 | 946060  | IL21R   |
| 3134.098 | -4354 | 1.35E-04 | 1322 | 0.333333 | 3.295293 | 1188248 | CHMP1A  |
| 2528.953 | -4354 | 1.35E-04 | 1493 | 0.333333 | 3.295063 | 958324  | GRK6    |
| 2573.922 | -4354 | 1.35E-04 | 1456 | 0.333333 | 3.295063 | 952522  | TUBA1B  |
| 2831.108 | -4354 | 1.35E-04 | 1447 | 0.333333 | 3.295063 | 1036762 | HERC2   |
| 2588.2   | -4354 | 1.35E-04 | 1368 | 0.333333 | 3.295063 | 975140  | FIS1    |
| 2370.962 | -4354 | 1.35E-04 | 1367 | 0.333333 | 3.295063 | 945902  | CLDN11  |
| 2696.023 | -4354 | 1.35E-04 | 1300 | 0.333333 | 3.295063 | 995898  | JMJD8   |

|          |       |          |      |          |          |         |          |
|----------|-------|----------|------|----------|----------|---------|----------|
| 3226.746 | -4354 | 1.35E-04 | 1500 | 0.333333 | 3.294834 | 1197734 | CHMP2B   |
| 2843.167 | -4354 | 1.35E-04 | 1476 | 0.333333 | 3.294834 | 1030304 | TBP      |
| 2111.096 | -4354 | 1.35E-04 | 1443 | 0.333333 | 3.294834 | 926608  | DIAPH2   |
| 2880.377 | -4354 | 1.35E-04 | 1384 | 0.333333 | 3.294834 | 1032034 | CBLC     |
| 2845.921 | -4354 | 1.35E-04 | 1517 | 0.333333 | 3.294604 | 1021088 | SMARCAD1 |
| 2192.399 | -4354 | 1.35E-04 | 1486 | 0.333333 | 3.294604 | 918916  | DGKB     |
| 2230.683 | -4354 | 1.35E-04 | 1450 | 0.333333 | 3.294604 | 980150  | INPP4A   |
| 1770.812 | -4354 | 1.35E-04 | 1395 | 0.333333 | 3.294604 | 888960  | WWTR1    |
| 2198.753 | -4354 | 1.35E-04 | 1474 | 0.333333 | 3.294374 | 960414  | LRP6     |
| 2263.068 | -4354 | 1.35E-04 | 1456 | 0.333333 | 3.294374 | 927836  | ARHGEF2  |
| 2124.11  | -4354 | 1.35E-04 | 1367 | 0.333333 | 3.294374 | 955864  | ELOVL5   |
| 2236.458 | -4354 | 1.35E-04 | 1365 | 0.333333 | 3.294374 | 954176  | CD8B     |
| 2722.164 | -4354 | 1.35E-04 | 1500 | 0.333333 | 3.294145 | 1007434 | ACADSB   |
| 3684.808 | -4354 | 1.35E-04 | 1474 | 0.333333 | 3.294145 | 1074338 | NDUFB11  |
| 2349.929 | -4354 | 1.35E-04 | 1446 | 0.333333 | 3.294145 | 984892  | IGSF11   |
| 2055.501 | -4354 | 1.35E-04 | 1566 | 0.333333 | 3.293915 | 904094  | ADORA1   |
| 2127.401 | -4354 | 1.35E-04 | 1435 | 0.333333 | 3.293915 | 971718  | PDK3     |
| 2165.613 | -4354 | 1.35E-04 | 1417 | 0.333333 | 3.293915 | 965228  | CPT1A    |
| 2857.211 | -4354 | 1.35E-04 | 1687 | 0.333333 | 3.293685 | 989348  | HSP90AA1 |
| 2695.679 | -4354 | 1.35E-04 | 1515 | 0.333333 | 3.293685 | 1028858 | WDR59    |
| 2278.842 | -4354 | 1.35E-04 | 1458 | 0.333333 | 3.293685 | 904392  | PAK5     |
| 1991.257 | -4354 | 1.35E-04 | 1453 | 0.333333 | 3.293685 | 931436  | F11R     |
| 1933.602 | -4354 | 1.35E-04 | 1407 | 0.333333 | 3.293685 | 916404  | PARVB    |
| 2329.26  | -4354 | 1.35E-04 | 1399 | 0.333333 | 3.293685 | 923232  | SNX3     |
| 2309.605 | -4354 | 1.35E-04 | 1366 | 0.333333 | 3.293685 | 933156  | LAMTOR1  |
| 2694.797 | -4354 | 1.35E-04 | 1568 | 0.333333 | 3.293456 | 979896  | PDHB     |
| 2415.777 | -4354 | 1.35E-04 | 1387 | 0.333333 | 3.293456 | 968580  | LAT      |
| 1967.812 | -4354 | 1.35E-04 | 1387 | 0.333333 | 3.293456 | 904840  | ANGPT2   |
| 3416.013 | -4354 | 1.35E-04 | 1668 | 0.333333 | 3.293226 | 1052656 | NDUFS1   |
| 2005.708 | -4354 | 1.35E-04 | 1496 | 0.333333 | 3.293226 | 923774  | SORBS1   |
| 2290.953 | -4354 | 1.35E-04 | 1483 | 0.333333 | 3.293226 | 979000  | OCRL     |
| 2460.057 | -4354 | 1.35E-04 | 1453 | 0.333333 | 3.293226 | 988522  | PDE6B    |
| 2017.775 | -4354 | 1.35E-04 | 1417 | 0.333333 | 3.293226 | 913588  | TNFSF11  |
| 2340.763 | -4354 | 1.35E-04 | 1451 | 0.333333 | 3.292997 | 975758  | PRKAB1   |
| 2220.447 | -4354 | 1.35E-04 | 1447 | 0.333333 | 3.292997 | 922740  | TRIP12   |
| 1986.85  | -4354 | 1.35E-04 | 1446 | 0.333333 | 3.292997 | 907152  | PTGDR    |
| 2478.309 | -4354 | 1.35E-04 | 1735 | 0.333333 | 3.292767 | 929944  | PSMA3    |
| 1969.482 | -4354 | 1.35E-04 | 1488 | 0.333333 | 3.292767 | 891248  | PDGFB    |
| 3069.413 | -4354 | 1.35E-04 | 1492 | 0.333333 | 3.292537 | 1133266 | MEF2D    |
| 2212.361 | -4354 | 1.35E-04 | 1367 | 0.333333 | 3.292537 | 943510  | ALDH3B2  |
| 2698.826 | -4354 | 1.35E-04 | 1356 | 0.333333 | 3.292537 | 1103020 | PLA2G2E  |

|          |       |          |      |          |          |         |           |
|----------|-------|----------|------|----------|----------|---------|-----------|
| 3407.035 | -4354 | 1.35E-04 | 1332 | 0.333333 | 3.292537 | 1238506 | CHMP6     |
| 1912.5   | -4354 | 1.35E-04 | 1469 | 0.333333 | 3.292308 | 848154  | CTSS      |
| 1950.937 | -4354 | 1.35E-04 | 1439 | 0.333333 | 3.292308 | 888562  | CSF1      |
| 3067.711 | -4354 | 1.35E-04 | 1373 | 0.333333 | 3.292308 | 1076554 | RNF125    |
| 2194.895 | -4354 | 1.35E-04 | 1335 | 0.333333 | 3.292308 | 912072  | CREB3L1   |
| 2138.711 | -4354 | 1.35E-04 | 1419 | 0.333333 | 3.292078 | 911504  | GM2A      |
| 1916.984 | -4354 | 1.35E-04 | 1404 | 0.333333 | 3.292078 | 894616  | LOXL2     |
| 2285.381 | -4354 | 1.35E-04 | 1309 | 0.333333 | 3.292078 | 938012  | EFL1      |
| 2032.132 | -4354 | 1.35E-04 | 1360 | 0.333333 | 3.291848 | 892424  | ATP6V1B1  |
| 2112.94  | -4354 | 1.34E-04 | 1501 | 0.333333 | 3.291619 | 956198  | GNB5      |
| 2001.614 | -4354 | 1.34E-04 | 1435 | 0.333333 | 3.291619 | 927324  | ZMAT3     |
| 2064.128 | -4354 | 1.34E-04 | 1349 | 0.333333 | 3.291619 | 884798  | IL37      |
| 2483.748 | -4354 | 1.34E-04 | 1317 | 0.333333 | 3.291619 | 960214  | ASPSR1    |
| 2054.294 | -4354 | 1.34E-04 | 1482 | 0.333333 | 3.291389 | 947532  | PPARD     |
| 1912.38  | -4354 | 1.34E-04 | 1477 | 0.333333 | 3.291389 | 884954  | RXRA      |
| 2361.238 | -4354 | 1.34E-04 | 1396 | 0.333333 | 3.291389 | 940352  | GSTM3     |
| 2047.33  | -4354 | 1.34E-04 | 1363 | 0.333333 | 3.291389 | 919064  | CD72      |
| 2247.298 | -4354 | 1.34E-04 | 1361 | 0.333333 | 3.291389 | 968736  | PHKA1     |
| 2276.225 | -4354 | 1.34E-04 | 1551 | 0.333333 | 3.29116  | 902790  | DRD2      |
| 2568.111 | -4354 | 1.34E-04 | 1429 | 0.333333 | 3.29093  | 946146  | UNC5D     |
| 1881.1   | -4354 | 1.34E-04 | 1301 | 0.333333 | 3.29093  | 891520  | ETV7      |
| 2238.028 | -4354 | 1.34E-04 | 1719 | 0.333333 | 3.2907   | 963332  | CREBBP    |
| 2272.948 | -4354 | 1.34E-04 | 1456 | 0.333333 | 3.2907   | 933662  | F12       |
| 2578.205 | -4354 | 1.34E-04 | 1545 | 0.333333 | 3.290471 | 934096  | RBX1      |
| 2185.214 | -4354 | 1.34E-04 | 1409 | 0.333333 | 3.290471 | 898342  | UBE2J1    |
| 3106.865 | -4354 | 1.34E-04 | 1387 | 0.333333 | 3.290471 | 1057738 | ORC6      |
| 1775.632 | -4354 | 1.34E-04 | 1369 | 0.333333 | 3.290471 | 875024  | TNFRSF10B |
| 2417.853 | -4354 | 1.34E-04 | 1350 | 0.333333 | 3.290471 | 958732  | KLHL13    |
| 1995.107 | -4354 | 1.34E-04 | 1334 | 0.333333 | 3.290471 | 886258  | TLE6      |
| 2624.913 | -4354 | 1.34E-04 | 1465 | 0.333333 | 3.290241 | 1008556 | TAOK1     |
| 2155.008 | -4354 | 1.34E-04 | 1450 | 0.333333 | 3.290241 | 945086  | CDKN2A    |
| 2569.493 | -4354 | 1.34E-04 | 1333 | 0.333333 | 3.290241 | 978792  | RAD9A     |
| 1678.499 | -4354 | 1.34E-04 | 1405 | 0.333333 | 3.290011 | 853312  | CAV2      |
| 1870.165 | -4354 | 1.34E-04 | 1404 | 0.333333 | 3.290011 | 852408  | EFNA2     |
| 2087.383 | -4354 | 1.34E-04 | 1385 | 0.333333 | 3.290011 | 889360  | PRKD2     |
| 2288.984 | -4354 | 1.34E-04 | 1377 | 0.333333 | 3.290011 | 969602  | VANGL1    |
| 2643.657 | -4354 | 1.34E-04 | 1292 | 0.333333 | 3.290011 | 967472  | PRMT3     |
| 1892.901 | -4354 | 1.34E-04 | 1467 | 0.333333 | 3.289782 | 874192  | GLI2      |
| 2594.847 | -4354 | 1.34E-04 | 1407 | 0.333333 | 3.289782 | 1117390 | PLA2G5    |
| 2534.503 | -4354 | 1.34E-04 | 1348 | 0.333333 | 3.289782 | 978764  | SLC22A5   |
| 2757.921 | -4354 | 1.34E-04 | 1299 | 0.333333 | 3.289782 | 985402  | FANCL     |

|          |       |          |      |          |          |        |         |
|----------|-------|----------|------|----------|----------|--------|---------|
| 1701.123 | -4354 | 1.34E-04 | 1443 | 0.333333 | 3.289552 | 853022 | COL13A1 |
| 1904.289 | -4354 | 1.34E-04 | 1354 | 0.333333 | 3.289552 | 872804 | CYP2U1  |
| 2218.096 | -4354 | 1.34E-04 | 1448 | 0.333333 | 3.289323 | 896678 | TRPC3   |
| 3254.691 | -4354 | 1.34E-04 | 1425 | 0.333333 | 3.289323 | 996168 | ATP5MC1 |
| 2446.808 | -4354 | 1.34E-04 | 1379 | 0.333333 | 3.289323 | 956160 | SLC2A8  |
| 1780.451 | -4354 | 1.34E-04 | 1417 | 0.333333 | 3.289093 | 843358 | GATA4   |
| 2086.724 | -4354 | 1.34E-04 | 1390 | 0.333333 | 3.289093 | 906404 | SREBF1  |
| 1728.137 | -4354 | 1.34E-04 | 1270 | 0.333333 | 3.289093 | 849734 | DENND6B |
| 2476.27  | -4354 | 1.34E-04 | 1503 | 0.333333 | 3.288863 | 947612 | RB1CC1  |
| 1779.879 | -4354 | 1.34E-04 | 1469 | 0.333333 | 3.288863 | 849952 | ITGAX   |
| 2380.095 | -4354 | 1.34E-04 | 1502 | 0.333333 | 3.288634 | 954170 | STK4    |
| 2215.984 | -4354 | 1.34E-04 | 1413 | 0.333333 | 3.288634 | 894922 | NR1I2   |
| 1907.858 | -4354 | 1.34E-04 | 1313 | 0.333333 | 3.288634 | 813606 | IL9     |
| 1877.164 | -4354 | 1.34E-04 | 1461 | 0.333333 | 3.288404 | 866050 | DUSP1   |
| 2386.599 | -4354 | 1.34E-04 | 1510 | 0.333333 | 3.288175 | 952480 | AKT2    |
| 2434.829 | -4354 | 1.34E-04 | 1475 | 0.333333 | 3.288175 | 912762 | TRPM3   |
| 2028.972 | -4354 | 1.34E-04 | 1325 | 0.333333 | 3.288175 | 880592 | PRAM1   |
| 1985.684 | -4354 | 1.34E-04 | 1304 | 0.333333 | 3.288175 | 903942 | SCIN    |
| 1714.787 | -4354 | 1.34E-04 | 1279 | 0.333333 | 3.288175 | 822850 | MS4A4A  |
| 2123.676 | -4354 | 1.34E-04 | 1500 | 0.333333 | 3.287945 | 882476 | MCL1    |
| 2488.976 | -4354 | 1.34E-04 | 1496 | 0.333333 | 3.287945 | 932482 | UBA2    |
| 2014.142 | -4354 | 1.34E-04 | 1443 | 0.333333 | 3.287945 | 881938 | NOTCH3  |
| 2166.727 | -4354 | 1.34E-04 | 1441 | 0.333333 | 3.287945 | 901186 | CXCL5   |
| 2630.484 | -4354 | 1.34E-04 | 1377 | 0.333333 | 3.287945 | 953896 | ECSIT   |
| 2064.168 | -4354 | 1.34E-04 | 1392 | 0.333333 | 3.287715 | 923868 | PLEKHB1 |
| 1959.125 | -4354 | 1.34E-04 | 1342 | 0.333333 | 3.287715 | 822756 | IL22    |
| 1718.586 | -4354 | 1.34E-04 | 1339 | 0.333333 | 3.287715 | 851416 | PDLIM2  |
| 2222.001 | -4354 | 1.34E-04 | 1297 | 0.333333 | 3.287715 | 919154 | CHKB    |
| 2488.995 | -4354 | 1.34E-04 | 1628 | 0.333333 | 3.287486 | 967122 | ATM     |
| 2154.045 | -4354 | 1.34E-04 | 1507 | 0.333333 | 3.287486 | 926468 | PPARA   |
| 2145.501 | -4354 | 1.34E-04 | 1424 | 0.333333 | 3.287256 | 877624 | NFKB2   |
| 1982.597 | -4354 | 1.34E-04 | 1424 | 0.333333 | 3.287026 | 913582 | CASP9   |
| 1883.682 | -4354 | 1.34E-04 | 1390 | 0.333333 | 3.287026 | 858002 | GADD45B |
| 2371.924 | -4354 | 1.34E-04 | 1379 | 0.333333 | 3.287026 | 903046 | SLC25A6 |
| 2186.977 | -4354 | 1.34E-04 | 1311 | 0.333333 | 3.287026 | 920196 | SLC27A1 |
| 2143.337 | -4354 | 1.34E-04 | 1547 | 0.333333 | 3.286797 | 890416 | CAMK2B  |
| 2574.696 | -4354 | 1.34E-04 | 1523 | 0.333333 | 3.286797 | 943998 | PIK3C2A |
| 2042.139 | -4354 | 1.34E-04 | 1438 | 0.333333 | 3.286797 | 875128 | CAMK1G  |
| 1968.152 | -4354 | 1.34E-04 | 1537 | 0.333333 | 3.286567 | 880484 | JAK3    |
| 2189.495 | -4354 | 1.34E-04 | 1467 | 0.333333 | 3.286567 | 934516 | PPP2R1B |
| 1915.143 | -4354 | 1.34E-04 | 1463 | 0.333333 | 3.286567 | 863708 | ITGB4   |

|          |       |          |      |          |          |        |         |
|----------|-------|----------|------|----------|----------|--------|---------|
| 2417.994 | -4354 | 1.34E-04 | 1430 | 0.333333 | 3.286567 | 928172 | PPP2R5D |
| 2032.249 | -4354 | 1.34E-04 | 1373 | 0.333333 | 3.286567 | 867668 | DNM1    |
| 1916.755 | -4354 | 1.34E-04 | 1367 | 0.333333 | 3.286567 | 882528 | MCOLN3  |
| 2099.622 | -4354 | 1.34E-04 | 1363 | 0.333333 | 3.286567 | 920928 | CACNB3  |
| 1781.149 | -4354 | 1.34E-04 | 1333 | 0.333333 | 3.286567 | 840644 | NLRP3   |
| 1796.924 | -4354 | 1.34E-04 | 1317 | 0.333333 | 3.286567 | 831232 | ENPP3   |
| 2280.7   | -4354 | 1.34E-04 | 1626 | 0.333333 | 3.286338 | 914286 | RB1     |
| 1841.548 | -4354 | 1.34E-04 | 1337 | 0.333333 | 3.286338 | 866956 | LTK     |
| 1900.009 | -4354 | 1.34E-04 | 1389 | 0.333333 | 3.286108 | 879428 | PI4K2A  |
| 2084.345 | -4354 | 1.34E-04 | 1322 | 0.333333 | 3.286108 | 890294 | MICB    |
| 2085.636 | -4354 | 1.34E-04 | 1489 | 0.333333 | 3.285878 | 884522 | CHRM1   |
| 2492.506 | -4354 | 1.34E-04 | 1415 | 0.333333 | 3.285878 | 983048 | CDKAL1  |
| 2256.777 | -4354 | 1.34E-04 | 1413 | 0.333333 | 3.285878 | 921082 | ACAA2   |
| 2023.493 | -4354 | 1.34E-04 | 1393 | 0.333333 | 3.285878 | 872870 | IRF9    |
| 2128.827 | -4354 | 1.34E-04 | 1497 | 0.333333 | 3.285649 | 895298 | AKT3    |
| 1756.921 | -4354 | 1.34E-04 | 1415 | 0.333333 | 3.285649 | 830160 | STAT6   |
| 2036.424 | -4354 | 1.34E-04 | 1412 | 0.333333 | 3.285649 | 838836 | IL4     |
| 2147.093 | -4354 | 1.34E-04 | 1397 | 0.333333 | 3.285649 | 920502 | PROK2   |
| 2539.49  | -4354 | 1.34E-04 | 1330 | 0.333333 | 3.285649 | 879398 | PFKL    |
| 1749.192 | -4354 | 1.34E-04 | 1328 | 0.333333 | 3.285649 | 844478 | LILRA1  |
| 2243.809 | -4354 | 1.34E-04 | 1300 | 0.333333 | 3.285649 | 907720 | MICA    |
| 2059.303 | -4354 | 1.34E-04 | 1449 | 0.333333 | 3.285419 | 910860 | SKIL    |
| 2171.07  | -4354 | 1.34E-04 | 1427 | 0.333333 | 3.285419 | 925582 | GOLGA2  |
| 1861.366 | -4354 | 1.34E-04 | 1381 | 0.333333 | 3.285419 | 847770 | CRB1    |
| 1780.555 | -4354 | 1.34E-04 | 1522 | 0.333333 | 3.285189 | 805198 | HTR2A   |
| 1591.471 | -4354 | 1.34E-04 | 1441 | 0.333333 | 3.285189 | 805002 | THBS1   |
| 2175.266 | -4354 | 1.34E-04 | 1393 | 0.333333 | 3.285189 | 924968 | LPCAT3  |
| 2600.097 | -4354 | 1.34E-04 | 1376 | 0.333333 | 3.285189 | 908106 | GSS     |
| 1708.905 | -4354 | 1.34E-04 | 1363 | 0.333333 | 3.285189 | 853698 | MPZL1   |
| 1947.504 | -4354 | 1.34E-04 | 1326 | 0.333333 | 3.285189 | 885248 | PRR5    |
| 2061.701 | -4354 | 1.34E-04 | 1470 | 0.333333 | 3.28496  | 874000 | NCK1    |
| 2164.835 | -4354 | 1.34E-04 | 1428 | 0.333333 | 3.28496  | 922096 | PTPRA   |
| 1991.355 | -4354 | 1.34E-04 | 1423 | 0.333333 | 3.28496  | 895598 | GLS     |
| 2387.816 | -4354 | 1.34E-04 | 1334 | 0.333333 | 3.28496  | 906730 | HJV     |
| 1812.319 | -4354 | 1.34E-04 | 1301 | 0.333333 | 3.28496  | 864704 | KLF13   |
| 2205.674 | -4354 | 1.34E-04 | 1276 | 0.333333 | 3.28496  | 875266 | LAMTOR2 |
| 2057.766 | -4354 | 1.34E-04 | 1263 | 0.333333 | 3.28496  | 868034 | RFNG    |
| 2670.651 | -4354 | 1.34E-04 | 1256 | 0.333333 | 3.28496  | 973604 | WHAMM   |
| 2524.284 | -4354 | 1.34E-04 | 1829 | 0.333333 | 3.28473  | 941452 | CDK2    |
| 2004.182 | -4354 | 1.34E-04 | 1457 | 0.333333 | 3.28473  | 878536 | PSEN1   |
| 2055.932 | -4354 | 1.34E-04 | 1420 | 0.333333 | 3.28473  | 891036 | SMARCA1 |

|          |       |          |      |          |          |        |         |
|----------|-------|----------|------|----------|----------|--------|---------|
| 2072.207 | -4354 | 1.34E-04 | 1367 | 0.333333 | 3.28473  | 849092 | CADM3   |
| 1733.485 | -4354 | 1.34E-04 | 1363 | 0.333333 | 3.28473  | 841822 | SULT1C2 |
| 2082.757 | -4354 | 1.34E-04 | 1341 | 0.333333 | 3.28473  | 911356 | AGPAT3  |
| 1927.667 | -4354 | 1.34E-04 | 1337 | 0.333333 | 3.28473  | 851756 | NCKAP1L |
| 1762.575 | -4354 | 1.34E-04 | 1307 | 0.333333 | 3.28473  | 797100 | LRAT    |
| 1894.202 | -4354 | 1.34E-04 | 1388 | 0.333333 | 3.284501 | 849492 | IL1RN   |
| 2311.885 | -4354 | 1.34E-04 | 1277 | 0.333333 | 3.284501 | 896680 | CLDN6   |
| 1948.096 | -4354 | 1.34E-04 | 1264 | 0.333333 | 3.284501 | 850302 | IL4I1   |
| 2287.764 | -4354 | 1.34E-04 | 1520 | 0.333333 | 3.284271 | 892018 | CANX    |
| 2389.405 | -4354 | 1.34E-04 | 1471 | 0.333333 | 3.284271 | 913602 | PSME4   |
| 1976.317 | -4354 | 1.34E-04 | 1270 | 0.333333 | 3.284271 | 879042 | TKTL1   |
| 2065.694 | -4354 | 1.34E-04 | 1250 | 0.333333 | 3.284271 | 850454 | PRAP1   |
| 2547.127 | -4354 | 1.34E-04 | 1600 | 0.333333 | 3.284041 | 936320 | MAD2L1  |
| 1746.519 | -4354 | 1.34E-04 | 1416 | 0.333333 | 3.284041 | 824372 | IL1RL1  |
| 2142.914 | -4354 | 1.34E-04 | 1395 | 0.333333 | 3.284041 | 913840 | MLF1    |
| 2299.389 | -4354 | 1.34E-04 | 1316 | 0.333333 | 3.284041 | 872386 | HIPK4   |
| 2426.107 | -4354 | 1.34E-04 | 1268 | 0.333333 | 3.284041 | 922390 | CRTC2   |
| 2039.19  | -4354 | 1.34E-04 | 1289 | 0.333333 | 3.283812 | 873990 | UBE2E2  |
| 2085.847 | -4354 | 1.34E-04 | 1491 | 0.333333 | 3.283582 | 893088 | ERBB3   |
| 2293.325 | -4354 | 1.34E-04 | 1464 | 0.333333 | 3.283582 | 910966 | SIAH1   |
| 1807.32  | -4354 | 1.34E-04 | 1448 | 0.333333 | 3.283582 | 840416 | PTPRB   |
| 2247.73  | -4354 | 1.34E-04 | 1426 | 0.333333 | 3.283582 | 909180 | MPP5    |
| 1948.466 | -4354 | 1.34E-04 | 1404 | 0.333333 | 3.283582 | 853280 | CCL23   |
| 2105.827 | -4354 | 1.34E-04 | 1392 | 0.333333 | 3.283582 | 885640 | GDF11   |
| 2074.073 | -4354 | 1.34E-04 | 1259 | 0.333333 | 3.283352 | 886254 | LDLRAP1 |
| 2326.694 | -4354 | 1.34E-04 | 1250 | 0.333333 | 3.283352 | 904474 | LDHD    |
| 2266.93  | -4354 | 1.34E-04 | 1370 | 0.333333 | 3.283123 | 919782 | FZD3    |
| 2089.429 | -4354 | 1.34E-04 | 1363 | 0.333333 | 3.283123 | 890316 | FDFT1   |
| 2014.77  | -4354 | 1.34E-04 | 1327 | 0.333333 | 3.283123 | 873250 | TPCN1   |
| 2159.872 | -4354 | 1.34E-04 | 1445 | 0.333333 | 3.282893 | 870254 | MCM5    |
| 1773.708 | -4354 | 1.34E-04 | 1441 | 0.333333 | 3.282893 | 846306 | ATF3    |
| 2405.47  | -4354 | 1.34E-04 | 1391 | 0.333333 | 3.282893 | 903818 | CPT2    |
| 2187.126 | -4354 | 1.34E-04 | 1363 | 0.333333 | 3.282893 | 890920 | MFN2    |
| 2214.82  | -4354 | 1.34E-04 | 1499 | 0.333333 | 3.282664 | 820774 | HTR2C   |
| 2499.683 | -4354 | 1.34E-04 | 1424 | 0.333333 | 3.282664 | 923610 | UBE4B   |
| 2454.274 | -4354 | 1.34E-04 | 1637 | 0.333333 | 3.282434 | 901678 | CSNK1A1 |
| 2645.753 | -4354 | 1.34E-04 | 1543 | 0.333333 | 3.282434 | 958436 | SKP2    |
| 2108.127 | -4354 | 1.34E-04 | 1445 | 0.333333 | 3.282434 | 871160 | MAX     |
| 2546.747 | -4354 | 1.34E-04 | 1500 | 0.333333 | 3.282204 | 945948 | BUB1B   |
| 2054.136 | -4354 | 1.34E-04 | 1438 | 0.333333 | 3.282204 | 870842 | MGST1   |
| 2345.53  | -4354 | 1.34E-04 | 1312 | 0.333333 | 3.282204 | 919346 | AP4M1   |

|          |       |          |      |          |          |         |         |
|----------|-------|----------|------|----------|----------|---------|---------|
| 2122.93  | -4354 | 1.34E-04 | 1301 | 0.333333 | 3.282204 | 908928  | VANGL2  |
| 1828.77  | -4354 | 1.34E-04 | 1332 | 0.333333 | 3.281975 | 844270  | LDLR    |
| 2455.482 | -4354 | 1.34E-04 | 1318 | 0.333333 | 3.281975 | 941262  | KIF3A   |
| 2063.069 | -4354 | 1.34E-04 | 1263 | 0.333333 | 3.281975 | 829342  | IFNL1   |
| 1977.84  | -4354 | 1.34E-04 | 1458 | 0.333333 | 3.281745 | 870828  | CD28    |
| 1807.342 | -4354 | 1.34E-04 | 1438 | 0.333333 | 3.281745 | 817218  | TBX5    |
| 2109.68  | -4354 | 1.34E-04 | 1362 | 0.333333 | 3.281745 | 860062  | MTMR6   |
| 2286.409 | -4354 | 1.34E-04 | 1248 | 0.333333 | 3.281745 | 905192  | CRACR2B |
| 2106.796 | -4354 | 1.34E-04 | 1360 | 0.333333 | 3.281515 | 868642  | RAP2C   |
| 1880.699 | -4354 | 1.34E-04 | 1334 | 0.333333 | 3.281515 | 873868  | MAP3K12 |
| 2128.191 | -4354 | 1.34E-04 | 1458 | 0.333333 | 3.281286 | 862052  | TAB2    |
| 2079.945 | -4354 | 1.34E-04 | 1441 | 0.333333 | 3.281286 | 902670  | E2F2    |
| 1870.475 | -4354 | 1.34E-04 | 1407 | 0.333333 | 3.281286 | 857474  | EPOR    |
| 2203.188 | -4354 | 1.34E-04 | 1402 | 0.333333 | 3.281286 | 855652  | AP1M1   |
| 2174.405 | -4354 | 1.34E-04 | 1590 | 0.333333 | 3.281056 | 855662  | PSMD1   |
| 2636.268 | -4354 | 1.34E-04 | 1559 | 0.333333 | 3.281056 | 934432  | CDC42   |
| 2235.349 | -4354 | 1.34E-04 | 1524 | 0.333333 | 3.281056 | 856864  | ACTR2   |
| 1672.065 | -4354 | 1.34E-04 | 1414 | 0.333333 | 3.281056 | 795816  | CFLAR   |
| 2120.61  | -4354 | 1.34E-04 | 1394 | 0.333333 | 3.281056 | 900750  | APAF1   |
| 1807.901 | -4354 | 1.34E-04 | 1516 | 0.333333 | 3.280827 | 787616  | KNG1    |
| 1952.507 | -4354 | 1.34E-04 | 1471 | 0.333333 | 3.280827 | 866454  | CBLB    |
| 2332.152 | -4354 | 1.34E-04 | 1309 | 0.333333 | 3.280827 | 924082  | ACOT4   |
| 1677.224 | -4354 | 1.34E-04 | 1307 | 0.333333 | 3.280827 | 763496  | FGF16   |
| 1697.37  | -4354 | 1.34E-04 | 1299 | 0.333333 | 3.280827 | 802716  | PLCE1   |
| 2531.71  | -4354 | 1.34E-04 | 1502 | 0.333333 | 3.280597 | 909366  | PDHA1   |
| 2191.563 | -4354 | 1.34E-04 | 1416 | 0.333333 | 3.280597 | 874086  | LAMTOR3 |
| 1723.198 | -4354 | 1.34E-04 | 1394 | 0.333333 | 3.280597 | 790754  | EPHA3   |
| 1717.303 | -4354 | 1.34E-04 | 1266 | 0.333333 | 3.280597 | 837760  | CST6    |
| 1799.511 | -4354 | 1.34E-04 | 1360 | 0.333333 | 3.280367 | 827360  | ARSA    |
| 2230.752 | -4354 | 1.34E-04 | 1344 | 0.333333 | 3.280367 | 888112  | MTMR4   |
| 1741.097 | -4354 | 1.34E-04 | 1311 | 0.333333 | 3.280367 | 834314  | GYG2    |
| 2299.091 | -4354 | 1.34E-04 | 1301 | 0.333333 | 3.280367 | 901552  | ATG10   |
| 4253.069 | -4354 | 1.34E-04 | 1475 | 0.333333 | 3.280138 | 1747058 | ENO1    |
| 2163.339 | -4354 | 1.34E-04 | 1402 | 0.333333 | 3.280138 | 884130  | HSP90B1 |
| 2106.079 | -4354 | 1.34E-04 | 1363 | 0.333333 | 3.280138 | 892282  | DGKE    |
| 2285.221 | -4354 | 1.34E-04 | 1508 | 0.333333 | 3.279908 | 892524  | MCM6    |
| 1999.783 | -4354 | 1.34E-04 | 1432 | 0.333333 | 3.279908 | 877154  | CTTN    |
| 1939.032 | -4354 | 1.34E-04 | 1423 | 0.333333 | 3.279908 | 829042  | TANK    |
| 2041.476 | -4354 | 1.34E-04 | 1345 | 0.333333 | 3.279908 | 847376  | IL20RA  |
| 2238.352 | -4354 | 1.34E-04 | 1322 | 0.333333 | 3.279908 | 871884  | MOB1B   |
| 2302.678 | -4354 | 1.34E-04 | 1392 | 0.333333 | 3.279679 | 874372  | POMP    |



|          |       |          |      |          |          |         |          |
|----------|-------|----------|------|----------|----------|---------|----------|
| 2024.783 | -4354 | 1.34E-04 | 1335 | 0.333333 | 3.279679 | 842238  | LLGL1    |
| 2050.219 | -4354 | 1.34E-04 | 1464 | 0.333333 | 3.279449 | 858746  | FASLG    |
| 1650.043 | -4354 | 1.34E-04 | 1371 | 0.333333 | 3.279449 | 800892  | L1CAM    |
| 2561.498 | -4354 | 1.34E-04 | 1335 | 0.333333 | 3.279449 | 908344  | DAPK3    |
| 2398.816 | -4354 | 1.34E-04 | 1552 | 0.333333 | 3.279219 | 894838  | PKN2     |
| 2067.365 | -4354 | 1.34E-04 | 1438 | 0.333333 | 3.279219 | 870514  | PPP2R2A  |
| 2444.264 | -4354 | 1.34E-04 | 1363 | 0.333333 | 3.279219 | 880140  | PVR      |
| 1869.206 | -4354 | 1.34E-04 | 1387 | 0.333333 | 3.27899  | 817470  | SLC1A2   |
| 1828.703 | -4354 | 1.34E-04 | 1369 | 0.333333 | 3.27899  | 828238  | SAV1     |
| 1961.759 | -4354 | 1.33E-04 | 1447 | 0.333333 | 3.27876  | 817056  | CYP4A11  |
| 1871.34  | -4354 | 1.33E-04 | 1424 | 0.333333 | 3.27876  | 811062  | FYB1     |
| 2059.808 | -4354 | 1.33E-04 | 1468 | 0.333333 | 3.27853  | 870182  | BMPR1A   |
| 1846.154 | -4354 | 1.33E-04 | 1414 | 0.333333 | 3.27853  | 800928  | TRPC4    |
| 1895.363 | -4354 | 1.33E-04 | 1364 | 0.333333 | 3.27853  | 839620  | TLR7     |
| 2266.91  | -4354 | 1.33E-04 | 1437 | 0.333333 | 3.278301 | 877472  | PRICKLE1 |
| 4280.722 | -4354 | 1.33E-04 | 1380 | 0.333333 | 3.278301 | 1692352 | FBXO4    |
| 1606.795 | -4354 | 1.33E-04 | 1352 | 0.333333 | 3.278301 | 791390  | ABCA1    |
| 1986.687 | -4354 | 1.33E-04 | 1353 | 0.333333 | 3.278071 | 855006  | CAMK2G   |
| 2495.694 | -4354 | 1.33E-04 | 1305 | 0.333333 | 3.278071 | 909706  | LIMK1    |
| 2317.187 | -4354 | 1.33E-04 | 1285 | 0.333333 | 3.278071 | 918502  | LIPE     |
| 2400.615 | -4354 | 1.33E-04 | 1281 | 0.333333 | 3.278071 | 897110  | EGLN2    |
| 1803.636 | -4354 | 1.33E-04 | 1259 | 0.333333 | 3.278071 | 808312  | VAMP5    |
| 2366.741 | -4354 | 1.33E-04 | 1551 | 0.333333 | 3.277842 | 885594  | IKBKB    |
| 2377.988 | -4354 | 1.33E-04 | 1366 | 0.333333 | 3.277842 | 845364  | CHRD     |
| 2183.265 | -4354 | 1.33E-04 | 1273 | 0.333333 | 3.277842 | 833948  | OTX1     |
| 2188.926 | -4354 | 1.33E-04 | 1438 | 0.333333 | 3.277612 | 825088  | TUBB     |
| 1667.379 | -4354 | 1.33E-04 | 1430 | 0.333333 | 3.277612 | 778702  | HLA-DPB1 |
| 2027.554 | -4354 | 1.33E-04 | 1332 | 0.333333 | 3.277612 | 855358  | ZBTB17   |
| 1693.918 | -4354 | 1.33E-04 | 1304 | 0.333333 | 3.277612 | 805632  | SFXN3    |
| 1762.31  | -4354 | 1.33E-04 | 1298 | 0.333333 | 3.277612 | 831018  | CLMN     |
| 1644.762 | -4354 | 1.33E-04 | 1308 | 0.333333 | 3.277382 | 763194  | VAMP3    |
| 1841.326 | -4354 | 1.33E-04 | 1275 | 0.333333 | 3.277382 | 804332  | NFATC4   |
| 1973.706 | -4354 | 1.33E-04 | 1273 | 0.333333 | 3.277382 | 846078  | GLS2     |
| 1959.287 | -4354 | 1.33E-04 | 1432 | 0.333333 | 3.277153 | 803824  | IL2      |
| 2894.536 | -4354 | 1.33E-04 | 1414 | 0.333333 | 3.277153 | 950948  | BRCA2    |
| 1981.836 | -4354 | 1.33E-04 | 1277 | 0.333333 | 3.277153 | 834558  | TAZ      |
| 2022.128 | -4354 | 1.33E-04 | 1252 | 0.333333 | 3.277153 | 855246  | GLUD2    |
| 1542.507 | -4354 | 1.33E-04 | 1249 | 0.333333 | 3.277153 | 763522  | NOX4     |
| 1848.777 | -4354 | 1.33E-04 | 1444 | 0.333333 | 3.276923 | 828506  | RHOJ     |
| 1954.003 | -4354 | 1.33E-04 | 1413 | 0.333333 | 3.276923 | 850726  | STAT2    |
| 2324.6   | -4354 | 1.33E-04 | 1355 | 0.333333 | 3.276923 | 861260  | PGM2     |

|          |       |          |      |          |          |         |          |
|----------|-------|----------|------|----------|----------|---------|----------|
| 1720.936 | -4354 | 1.33E-04 | 1330 | 0.333333 | 3.276923 | 791618  | ADAM17   |
| 2029.864 | -4354 | 1.33E-04 | 1319 | 0.333333 | 3.276923 | 872822  | HSPA1L   |
| 2056.334 | -4354 | 1.33E-04 | 1284 | 0.333333 | 3.276923 | 850658  | FREM2    |
| 2052.94  | -4354 | 1.33E-04 | 1241 | 0.333333 | 3.276923 | 863020  | LRRC23   |
| 2186.473 | -4354 | 1.33E-04 | 1474 | 0.333333 | 3.276693 | 870058  | TFDP1    |
| 2241.247 | -4354 | 1.33E-04 | 1388 | 0.333333 | 3.276693 | 858898  | CUL7     |
| 2383.174 | -4354 | 1.33E-04 | 1342 | 0.333333 | 3.276693 | 840844  | NAGLU    |
| 1842.949 | -4354 | 1.33E-04 | 1305 | 0.333333 | 3.276693 | 838406  | MEGF8    |
| 2010.088 | -4354 | 1.33E-04 | 1284 | 0.333333 | 3.276693 | 864488  | CALML4   |
| 2284.79  | -4354 | 1.33E-04 | 1483 | 0.333333 | 3.276464 | 872728  | RHOT1    |
| 1906.829 | -4354 | 1.33E-04 | 1374 | 0.333333 | 3.276464 | 841720  | ACSL6    |
| 2173.568 | -4354 | 1.33E-04 | 1302 | 0.333333 | 3.276464 | 865250  | E2F6     |
| 2451.332 | -4354 | 1.33E-04 | 1650 | 0.333333 | 3.276234 | 909984  | CHEK1    |
| 1976.285 | -4354 | 1.33E-04 | 1425 | 0.333333 | 3.276234 | 849418  | PML      |
| 2627.479 | -4354 | 1.33E-04 | 1301 | 0.333333 | 3.276234 | 863958  | PPIP5K2  |
| 1622.954 | -4354 | 1.33E-04 | 1280 | 0.333333 | 3.276234 | 778470  | HLA-DRB4 |
| 1682.479 | -4354 | 1.33E-04 | 1260 | 0.333333 | 3.276234 | 732766  | TRPV5    |
| 2301.787 | -4354 | 1.33E-04 | 1255 | 0.333333 | 3.276234 | 966032  | PLA2G2F  |
| 1918.734 | -4354 | 1.33E-04 | 1478 | 0.333333 | 3.276005 | 833064  | CD247    |
| 2439.8   | -4354 | 1.33E-04 | 1421 | 0.333333 | 3.276005 | 899732  | VAPB     |
| 2018.88  | -4354 | 1.33E-04 | 1343 | 0.333333 | 3.276005 | 848582  | IL17D    |
| 2173.135 | -4354 | 1.33E-04 | 1304 | 0.333333 | 3.276005 | 842728  | EIF4G2   |
| 1885.88  | -4354 | 1.33E-04 | 1283 | 0.333333 | 3.276005 | 823702  | LTB      |
| 2499.085 | -4354 | 1.33E-04 | 1556 | 0.333333 | 3.275775 | 908554  | CDC6     |
| 1716.526 | -4354 | 1.33E-04 | 1356 | 0.333333 | 3.275775 | 811116  | JDP2     |
| 1922.81  | -4354 | 1.33E-04 | 1302 | 0.333333 | 3.275545 | 806844  | CD164    |
| 1980.47  | -4354 | 1.33E-04 | 1247 | 0.333333 | 3.275545 | 795008  | IFNL2    |
| 3380.52  | -4354 | 1.33E-04 | 1397 | 0.333333 | 3.275316 | 1276806 | PPP1R3B  |
| 1744.87  | -4354 | 1.33E-04 | 1359 | 0.333333 | 3.275316 | 814550  | EVC      |
| 1570.608 | -4354 | 1.33E-04 | 1289 | 0.333333 | 3.275316 | 782174  | CDKN1C   |
| 2058.139 | -4354 | 1.33E-04 | 1276 | 0.333333 | 3.275316 | 842090  | PLXNA3   |
| 2161.141 | -4354 | 1.33E-04 | 1457 | 0.333333 | 3.275086 | 842482  | DNM1L    |
| 1698.14  | -4354 | 1.33E-04 | 1407 | 0.333333 | 3.275086 | 780964  | ADCY1    |
| 2125.632 | -4354 | 1.33E-04 | 1391 | 0.333333 | 3.275086 | 840110  | CCNC     |
| 1850.324 | -4354 | 1.33E-04 | 1291 | 0.333333 | 3.275086 | 804144  | NCSTN    |
| 2068.015 | -4354 | 1.33E-04 | 1263 | 0.333333 | 3.275086 | 813946  | DHH      |
| 1910.463 | -4354 | 1.33E-04 | 1363 | 0.333333 | 3.274856 | 809250  | FREM1    |
| 2082.371 | -4354 | 1.33E-04 | 1312 | 0.333333 | 3.274856 | 838912  | PRPS1    |
| 2114.231 | -4354 | 1.33E-04 | 1411 | 0.333333 | 3.274627 | 830730  | PRMT1    |
| 2104.82  | -4354 | 1.33E-04 | 1402 | 0.333333 | 3.274627 | 848834  | PIKFYVE  |
| 1863.037 | -4354 | 1.33E-04 | 1363 | 0.333333 | 3.274627 | 788836  | GDNF     |

|          |       |          |      |          |          |        |          |
|----------|-------|----------|------|----------|----------|--------|----------|
| 2109.99  | -4354 | 1.33E-04 | 1346 | 0.333333 | 3.274627 | 875818 | MLYCD    |
| 1794.361 | -4354 | 1.33E-04 | 1292 | 0.333333 | 3.274627 | 725682 | CRX      |
| 1948.371 | -4354 | 1.33E-04 | 1293 | 0.333333 | 3.274397 | 813470 | CDC34    |
| 1969.513 | -4354 | 1.33E-04 | 1269 | 0.333333 | 3.274397 | 846126 | SORD     |
| 1705.487 | -4354 | 1.33E-04 | 1392 | 0.333333 | 3.274168 | 780696 | SEMA3D   |
| 1803.372 | -4354 | 1.33E-04 | 1349 | 0.333333 | 3.274168 | 817834 | RAP1GAP  |
| 2027.841 | -4354 | 1.33E-04 | 1290 | 0.333333 | 3.274168 | 802344 | IMPA1    |
| 2135.469 | -4354 | 1.33E-04 | 1426 | 0.333333 | 3.273938 | 844050 | AZI2     |
| 1862.297 | -4354 | 1.33E-04 | 1356 | 0.333333 | 3.273938 | 836152 | FGD3     |
| 1832.611 | -4354 | 1.33E-04 | 1354 | 0.333333 | 3.273938 | 780818 | UBE2A    |
| 1922.7   | -4354 | 1.33E-04 | 1258 | 0.333333 | 3.273938 | 844498 | OCLN     |
| 1713.092 | -4354 | 1.33E-04 | 1372 | 0.333333 | 3.273708 | 770550 | RARB     |
| 1806.566 | -4354 | 1.33E-04 | 1355 | 0.333333 | 3.273708 | 785630 | SLIT1    |
| 2082.962 | -4354 | 1.33E-04 | 1275 | 0.333333 | 3.273708 | 824634 | PRPF19   |
| 1685.466 | -4354 | 1.33E-04 | 1408 | 0.333333 | 3.273479 | 772428 | CR1      |
| 2238.992 | -4354 | 1.33E-04 | 1393 | 0.333333 | 3.273479 | 865150 | STRADA   |
| 2488.471 | -4354 | 1.33E-04 | 1382 | 0.333333 | 3.273479 | 911214 | RPAP2    |
| 2261.413 | -4354 | 1.33E-04 | 1451 | 0.333333 | 3.273249 | 847642 | STAG1    |
| 1799.059 | -4354 | 1.33E-04 | 1392 | 0.333333 | 3.273249 | 805428 | SLC40A1  |
| 2137.061 | -4354 | 1.33E-04 | 1367 | 0.333333 | 3.273249 | 859630 | TFDP2    |
| 1873.782 | -4354 | 1.33E-04 | 1308 | 0.333333 | 3.273249 | 809796 | PIK3R6   |
| 1859.522 | -4354 | 1.33E-04 | 1273 | 0.333333 | 3.273249 | 807076 | DACT2    |
| 1744.903 | -4354 | 1.33E-04 | 1257 | 0.333333 | 3.273249 | 789630 | FBXO2    |
| 2338.692 | -4354 | 1.33E-04 | 1247 | 0.333333 | 3.273249 | 859536 | LIN37    |
| 2244.396 | -4354 | 1.33E-04 | 1371 | 0.333333 | 3.27302  | 835046 | HEXA     |
| 1849.837 | -4354 | 1.33E-04 | 1343 | 0.333333 | 3.27302  | 783828 | MAG      |
| 1868     | -4354 | 1.33E-04 | 1252 | 0.333333 | 3.27302  | 796478 | CD46     |
| 1741.821 | -4354 | 1.33E-04 | 1323 | 0.333333 | 3.27279  | 781190 | RASSF5   |
| 1954.809 | -4354 | 1.33E-04 | 1304 | 0.333333 | 3.27279  | 808988 | ATP6V1G1 |
| 1694.346 | -4354 | 1.33E-04 | 1350 | 0.333333 | 3.27256  | 793264 | CDS2     |
| 1791.564 | -4354 | 1.33E-04 | 1316 | 0.333333 | 3.27256  | 788112 | DNM2     |
| 1749.05  | -4354 | 1.33E-04 | 1274 | 0.333333 | 3.27256  | 813214 | TBC1D16  |
| 2577.227 | -4354 | 1.33E-04 | 1423 | 0.333333 | 3.272331 | 850020 | NDUFS3   |
| 2101.282 | -4354 | 1.33E-04 | 1382 | 0.333333 | 3.272331 | 819456 | SUCLG1   |
| 2086.761 | -4354 | 1.33E-04 | 1428 | 0.333333 | 3.272101 | 866398 | ACACA    |
| 2887.749 | -4354 | 1.33E-04 | 1405 | 0.333333 | 3.272101 | 884686 | NDUFB3   |
| 2224.399 | -4354 | 1.33E-04 | 1373 | 0.333333 | 3.272101 | 879046 | CCNJ     |
| 1517.493 | -4354 | 1.33E-04 | 1321 | 0.333333 | 3.272101 | 725910 | HLA-DPA1 |
| 1590.453 | -4354 | 1.33E-04 | 1281 | 0.333333 | 3.272101 | 761836 | GNLY     |
| 2308.976 | -4354 | 1.33E-04 | 1269 | 0.333333 | 3.272101 | 892826 | EDARADD  |
| 2033.296 | -4354 | 1.33E-04 | 1365 | 0.333333 | 3.271871 | 820440 | CD274    |

|          |       |          |      |          |          |         |         |
|----------|-------|----------|------|----------|----------|---------|---------|
| 1805.799 | -4354 | 1.33E-04 | 1340 | 0.333333 | 3.271871 | 790996  | BCL10   |
| 1380.379 | -4354 | 1.33E-04 | 1229 | 0.333333 | 3.271871 | 681068  | ATP4B   |
| 1727.006 | -4354 | 1.33E-04 | 1443 | 0.333333 | 3.271642 | 744212  | CCKAR   |
| 2111.622 | -4354 | 1.33E-04 | 1376 | 0.333333 | 3.271642 | 836986  | PI4KB   |
| 1845.402 | -4354 | 1.33E-04 | 1373 | 0.333333 | 3.271642 | 823464  | GGA2    |
| 1891.525 | -4354 | 1.33E-04 | 1339 | 0.333333 | 3.271642 | 833028  | GNPTAB  |
| 1794.237 | -4354 | 1.33E-04 | 1318 | 0.333333 | 3.271642 | 820196  | ACOX1   |
| 1831.237 | -4354 | 1.33E-04 | 1305 | 0.333333 | 3.271642 | 806896  | SOS2    |
| 2133.515 | -4354 | 1.33E-04 | 1564 | 0.333333 | 3.271412 | 813928  | UBE2D1  |
| 2105.854 | -4354 | 1.33E-04 | 1492 | 0.333333 | 3.271412 | 834870  | NCOA2   |
| 2072.945 | -4354 | 1.33E-04 | 1349 | 0.333333 | 3.271412 | 828038  | AGA     |
| 1832.765 | -4354 | 1.33E-04 | 1309 | 0.333333 | 3.271412 | 826138  | SLC11A2 |
| 2318.199 | -4354 | 1.33E-04 | 1300 | 0.333333 | 3.271412 | 857886  | CACNG4  |
| 1933.504 | -4354 | 1.33E-04 | 1286 | 0.333333 | 3.271412 | 792270  | DNAJC3  |
| 2332.487 | -4354 | 1.33E-04 | 1265 | 0.333333 | 3.271412 | 837612  | ENDOG   |
| 2154.848 | -4354 | 1.33E-04 | 1256 | 0.333333 | 3.271412 | 819814  | SLC27A4 |
| 1849.251 | -4354 | 1.33E-04 | 1305 | 0.333333 | 3.271183 | 784694  | POU2F2  |
| 1605.182 | -4354 | 1.33E-04 | 1275 | 0.333333 | 3.271183 | 764968  | LRPAP1  |
| 2088.851 | -4354 | 1.33E-04 | 1274 | 0.333333 | 3.271183 | 841858  | SENP2   |
| 1691.15  | -4354 | 1.33E-04 | 1274 | 0.333333 | 3.270953 | 774724  | ITGAD   |
| 2123.471 | -4354 | 1.33E-04 | 1224 | 0.333333 | 3.270953 | 846672  | SRD5A3  |
| 2217.878 | -4354 | 1.33E-04 | 1360 | 0.333333 | 3.270723 | 856600  | POU2F1  |
| 4321.819 | -4354 | 1.33E-04 | 1348 | 0.333333 | 3.270723 | 1762748 | ENO3    |
| 1799.581 | -4354 | 1.33E-04 | 1346 | 0.333333 | 3.270723 | 787026  | TRPC1   |
| 1832.254 | -4354 | 1.33E-04 | 1316 | 0.333333 | 3.270723 | 760046  | NTN1    |
| 1795.303 | -4354 | 1.33E-04 | 1287 | 0.333333 | 3.270723 | 810236  | HK2     |
| 1978.051 | -4354 | 1.33E-04 | 1195 | 0.333333 | 3.270723 | 827462  | PTTG2   |
| 1755.812 | -4354 | 1.33E-04 | 1354 | 0.333333 | 3.270494 | 710442  | ADRB3   |
| 3042.584 | -4354 | 1.33E-04 | 1431 | 0.333333 | 3.270264 | 900764  | NDUFA4  |
| 1643.163 | -4354 | 1.33E-04 | 1319 | 0.333333 | 3.270264 | 757260  | NECTIN1 |
| 1671.668 | -4354 | 1.33E-04 | 1307 | 0.333333 | 3.270264 | 773664  | CD1E    |
| 1887.762 | -4354 | 1.33E-04 | 1271 | 0.333333 | 3.270264 | 774002  | STX1B   |
| 1781.389 | -4354 | 1.33E-04 | 1203 | 0.333333 | 3.270264 | 761074  | PTCRA   |
| 2210.129 | -4354 | 1.33E-04 | 1461 | 0.333333 | 3.270034 | 808474  | HADHA   |
| 1879.847 | -4354 | 1.33E-04 | 1388 | 0.333333 | 3.270034 | 783482  | VAPA    |
| 2248.491 | -4354 | 1.33E-04 | 1377 | 0.333333 | 3.270034 | 820586  | FAF1    |
| 1792.419 | -4354 | 1.33E-04 | 1366 | 0.333333 | 3.270034 | 788356  | CCNG2   |
| 2042.419 | -4354 | 1.33E-04 | 1342 | 0.333333 | 3.270034 | 832120  | CXCL11  |
| 1684.353 | -4354 | 1.33E-04 | 1232 | 0.333333 | 3.270034 | 747266  | MX2     |
| 2264.009 | -4354 | 1.33E-04 | 1419 | 0.333333 | 3.269805 | 837250  | CSNK1G3 |
| 1632.72  | -4354 | 1.33E-04 | 1301 | 0.333333 | 3.269805 | 760530  | FLOT1   |

|          |       |          |      |          |          |        |           |
|----------|-------|----------|------|----------|----------|--------|-----------|
| 2073.959 | -4354 | 1.33E-04 | 1283 | 0.333333 | 3.269805 | 811568 | GSTM4     |
| 1933.549 | -4354 | 1.33E-04 | 1311 | 0.333333 | 3.269575 | 810304 | AMACR     |
| 1649.141 | -4354 | 1.33E-04 | 1262 | 0.333333 | 3.269575 | 797654 | SYNJ2     |
| 1600.662 | -4354 | 1.33E-04 | 1224 | 0.333333 | 3.269575 | 770284 | NLRX1     |
| 2048.902 | -4354 | 1.33E-04 | 1408 | 0.333333 | 3.269346 | 832276 | XCL1      |
| 1879.203 | -4354 | 1.33E-04 | 1370 | 0.333333 | 3.269346 | 799708 | NCKAP1    |
| 1957.87  | -4354 | 1.33E-04 | 1265 | 0.333333 | 3.269346 | 812408 | NKD2      |
| 1958.032 | -4354 | 1.33E-04 | 1234 | 0.333333 | 3.269346 | 824698 | SOX8      |
| 2207.843 | -4354 | 1.33E-04 | 1595 | 0.333333 | 3.269116 | 830846 | PTPN11    |
| 1945.288 | -4354 | 1.33E-04 | 1355 | 0.333333 | 3.269116 | 755616 | GUCA1A    |
| 1512.125 | -4354 | 1.33E-04 | 1298 | 0.333333 | 3.269116 | 738278 | TNFRSF9   |
| 1962.086 | -4354 | 1.33E-04 | 1239 | 0.333333 | 3.269116 | 800860 | HSH2D     |
| 1559.177 | -4354 | 1.33E-04 | 1231 | 0.333333 | 3.268886 | 764734 | ESAM      |
| 1699.645 | -4354 | 1.33E-04 | 1395 | 0.333333 | 3.268657 | 743376 | GRIA3     |
| 2128.787 | -4354 | 1.33E-04 | 1286 | 0.333333 | 3.268657 | 856122 | ATP6V0A2  |
| 1653.642 | -4354 | 1.33E-04 | 1240 | 0.333333 | 3.268657 | 731738 | CYBA      |
| 2002.924 | -4354 | 1.33E-04 | 1218 | 0.333333 | 3.268657 | 802794 | TNFRSF13C |
| 2865.062 | -4354 | 1.33E-04 | 1475 | 0.333333 | 3.268427 | 898082 | NDUFA10   |
| 2081.135 | -4354 | 1.33E-04 | 1415 | 0.333333 | 3.268427 | 747704 | TACR1     |
| 2122.764 | -4354 | 1.33E-04 | 1315 | 0.333333 | 3.268427 | 815812 | CREB3L3   |
| 1504.662 | -4354 | 1.33E-04 | 1259 | 0.333333 | 3.268427 | 722688 | PLN       |
| 2785.506 | -4354 | 1.33E-04 | 1353 | 0.333333 | 3.268197 | 836166 | UQCRCQ    |
| 1874.634 | -4354 | 1.33E-04 | 1210 | 0.333333 | 3.268197 | 769876 | CXCL17    |
| 2159.083 | -4354 | 1.33E-04 | 1427 | 0.333333 | 3.267968 | 818090 | ITCH      |
| 1905.568 | -4354 | 1.33E-04 | 1355 | 0.333333 | 3.267968 | 756342 | PAX3      |
| 1351.774 | -4354 | 1.33E-04 | 1341 | 0.333333 | 3.267968 | 719202 | HBEGF     |
| 2112.246 | -4354 | 1.33E-04 | 1506 | 0.333333 | 3.267738 | 819110 | RBBP4     |
| 2252.231 | -4354 | 1.33E-04 | 1404 | 0.333333 | 3.267738 | 814804 | BAD       |
| 1890.804 | -4354 | 1.33E-04 | 1205 | 0.333333 | 3.267738 | 790656 | NAPSA     |
| 1886.312 | -4354 | 1.33E-04 | 1364 | 0.333333 | 3.267509 | 779592 | PRKAR1A   |
| 1740.082 | -4354 | 1.33E-04 | 1284 | 0.333333 | 3.267509 | 762452 | LGALS8    |
| 1595.978 | -4354 | 1.33E-04 | 1257 | 0.333333 | 3.267509 | 746452 | TNFRSF4   |
| 1791.527 | -4354 | 1.33E-04 | 1359 | 0.333333 | 3.267279 | 760838 | COL4A3    |
| 2013.167 | -4354 | 1.33E-04 | 1268 | 0.333333 | 3.267279 | 828234 | PHLPP2    |
| 1618.788 | -4354 | 1.33E-04 | 1246 | 0.333333 | 3.267279 | 762272 | ME1       |
| 1863.501 | -4354 | 1.33E-04 | 1242 | 0.333333 | 3.267279 | 789066 | TSLP      |
| 2047.595 | -4354 | 1.33E-04 | 1406 | 0.333333 | 3.267049 | 798752 | MCM7      |
| 1924.317 | -4354 | 1.33E-04 | 1325 | 0.333333 | 3.267049 | 809844 | HMGCS1    |
| 1978.506 | -4354 | 1.33E-04 | 1324 | 0.333333 | 3.267049 | 827394 | ELK4      |
| 1623.645 | -4354 | 1.33E-04 | 1267 | 0.333333 | 3.267049 | 711840 | MAPK4     |
| 1636.633 | -4354 | 1.33E-04 | 1261 | 0.333333 | 3.267049 | 757144 | DAG1      |

|          |       |          |      |          |          |        |         |
|----------|-------|----------|------|----------|----------|--------|---------|
| 1999.418 | -4354 | 1.33E-04 | 1212 | 0.333333 | 3.267049 | 830884 | H2BC11  |
| 1514.443 | -4354 | 1.33E-04 | 1177 | 0.333333 | 3.267049 | 724822 | MTSS2   |
| 1985.791 | -4354 | 1.33E-04 | 1434 | 0.333333 | 3.26682  | 758258 | PSMD6   |
| 1997.921 | -4354 | 1.33E-04 | 1357 | 0.333333 | 3.26682  | 823554 | SSH2    |
| 1722.318 | -4354 | 1.33E-04 | 1245 | 0.333333 | 3.26682  | 740158 | LCAT    |
| 1626.558 | -4354 | 1.33E-04 | 1246 | 0.333333 | 3.26659  | 758198 | DIAPH1  |
| 1495.923 | -4354 | 1.33E-04 | 1238 | 0.333333 | 3.26659  | 712392 | TFE3    |
| 1826.687 | -4354 | 1.33E-04 | 1230 | 0.333333 | 3.26659  | 785176 | PARD6B  |
| 2858.078 | -4354 | 1.33E-04 | 1459 | 0.333333 | 3.266361 | 847466 | NDUFB4  |
| 2013.635 | -4354 | 1.33E-04 | 1400 | 0.333333 | 3.266361 | 829936 | CCNE1   |
| 1649.572 | -4354 | 1.33E-04 | 1397 | 0.333333 | 3.266361 | 720448 | HLA-F   |
| 1730.941 | -4354 | 1.33E-04 | 1363 | 0.333333 | 3.266361 | 768448 | BCL2L1  |
| 1805.99  | -4354 | 1.33E-04 | 1273 | 0.333333 | 3.266361 | 757108 | MYL6    |
| 1826.43  | -4354 | 1.33E-04 | 1427 | 0.333333 | 3.266131 | 778214 | DLG4    |
| 1866.926 | -4354 | 1.33E-04 | 1335 | 0.333333 | 3.266131 | 760554 | RAB10   |
| 1808.652 | -4354 | 1.33E-04 | 1319 | 0.333333 | 3.266131 | 761348 | ACVR1B  |
| 2832.349 | -4354 | 1.33E-04 | 1306 | 0.333333 | 3.266131 | 861700 | NDUFS6  |
| 2028.974 | -4354 | 1.33E-04 | 1285 | 0.333333 | 3.266131 | 773282 | PAK4    |
| 1613.684 | -4354 | 1.33E-04 | 1249 | 0.333333 | 3.265901 | 755390 | AREG    |
| 2125.083 | -4354 | 1.33E-04 | 1236 | 0.333333 | 3.265901 | 779334 | LAMTOR5 |
| 1633.163 | -4354 | 1.32E-04 | 1278 | 0.333333 | 3.265672 | 741974 | TRIM38  |
| 1881.737 | -4354 | 1.32E-04 | 1174 | 0.333333 | 3.265672 | 775762 | KIF7    |
| 1569.065 | -4354 | 1.32E-04 | 1229 | 0.333333 | 3.265442 | 744458 | SEMA3F  |
| 1823.535 | -4354 | 1.32E-04 | 1344 | 0.333333 | 3.265212 | 774820 | HHIP    |
| 2055.304 | -4354 | 1.32E-04 | 1298 | 0.333333 | 3.265212 | 828848 | LIMD1   |
| 1718.62  | -4354 | 1.32E-04 | 1248 | 0.333333 | 3.265212 | 743572 | MAP3K6  |
| 1728.982 | -4354 | 1.32E-04 | 1206 | 0.333333 | 3.265212 | 775886 | SLC51A  |
| 2046.894 | -4354 | 1.32E-04 | 1464 | 0.333333 | 3.264983 | 784136 | HDAC2   |
| 1792.573 | -4354 | 1.32E-04 | 1399 | 0.333333 | 3.264983 | 765940 | YES1    |
| 1941.411 | -4354 | 1.32E-04 | 1225 | 0.333333 | 3.264983 | 757690 | FLT3LG  |
| 1298.243 | -4354 | 1.32E-04 | 1222 | 0.333333 | 3.264983 | 649194 | BRINP1  |
| 1911.799 | -4354 | 1.32E-04 | 1392 | 0.333333 | 3.264753 | 804464 | NFATC2  |
| 1836.044 | -4354 | 1.32E-04 | 1302 | 0.333333 | 3.264753 | 748250 | UBE2G1  |
| 1705.561 | -4354 | 1.32E-04 | 1260 | 0.333333 | 3.264753 | 720442 | ARPC4   |
| 2316.49  | -4354 | 1.32E-04 | 1466 | 0.333333 | 3.264524 | 810588 | RPS6KB1 |
| 2008.816 | -4354 | 1.32E-04 | 1320 | 0.333333 | 3.264524 | 809386 | CSNK1G1 |
| 1705.533 | -4354 | 1.32E-04 | 1314 | 0.333333 | 3.264524 | 742958 | CCL13   |
| 1591.26  | -4354 | 1.32E-04 | 1301 | 0.333333 | 3.264524 | 731788 | MYO9B   |
| 2130.212 | -4354 | 1.32E-04 | 1288 | 0.333333 | 3.264524 | 801142 | PPIA    |
| 1854.566 | -4354 | 1.32E-04 | 1275 | 0.333333 | 3.264524 | 747914 | PRMT5   |
| 2065.209 | -4354 | 1.32E-04 | 1273 | 0.333333 | 3.264524 | 816754 | CDC45   |

|          |       |          |      |          |          |        |          |
|----------|-------|----------|------|----------|----------|--------|----------|
| 1762.391 | -4354 | 1.32E-04 | 1398 | 0.333333 | 3.264294 | 753974 | CSNK1D   |
| 1902.968 | -4354 | 1.32E-04 | 1370 | 0.333333 | 3.264294 | 794308 | DICER1   |
| 1814.235 | -4354 | 1.32E-04 | 1198 | 0.333333 | 3.264294 | 747310 | AKR1A1   |
| 2082.415 | -4354 | 1.32E-04 | 1506 | 0.333333 | 3.264064 | 781606 | CCNB1    |
| 1955.551 | -4354 | 1.32E-04 | 1418 | 0.333333 | 3.264064 | 770046 | RAD21    |
| 1697.866 | -4354 | 1.32E-04 | 1335 | 0.333333 | 3.264064 | 711262 | CYP2A6   |
| 2008.293 | -4354 | 1.32E-04 | 1221 | 0.333333 | 3.264064 | 766354 | ATG16L2  |
| 1796.491 | -4354 | 1.32E-04 | 1244 | 0.333333 | 3.263835 | 760738 | NR2F6    |
| 1822.013 | -4354 | 1.32E-04 | 1223 | 0.333333 | 3.263835 | 762116 | HTRA2    |
| 2512.096 | -4354 | 1.32E-04 | 1534 | 0.333333 | 3.263605 | 852426 | BRCA1    |
| 2000.278 | -4354 | 1.32E-04 | 1467 | 0.333333 | 3.263605 | 770934 | CDC27    |
| 1863.154 | -4354 | 1.32E-04 | 1313 | 0.333333 | 3.263605 | 741518 | FGF10    |
| 2139.205 | -4354 | 1.32E-04 | 1249 | 0.333333 | 3.263605 | 812778 | TJAP1    |
| 2626.548 | -4354 | 1.32E-04 | 1383 | 0.333333 | 3.263375 | 786630 | ATP5F1D  |
| 1855.53  | -4354 | 1.32E-04 | 1367 | 0.333333 | 3.263375 | 758348 | PPP1R12A |
| 1968.16  | -4354 | 1.32E-04 | 1313 | 0.333333 | 3.263375 | 786380 | C9orf72  |
| 1703.343 | -4354 | 1.32E-04 | 1288 | 0.333333 | 3.263146 | 703928 | PKLR     |
| 1661.426 | -4354 | 1.32E-04 | 1243 | 0.333333 | 3.263146 | 738076 | MFNG     |
| 1959.262 | -4354 | 1.32E-04 | 1342 | 0.333333 | 3.262916 | 756812 | ROCK1    |
| 1615.855 | -4354 | 1.32E-04 | 1258 | 0.333333 | 3.262916 | 737940 | RAG1     |
| 1697.724 | -4354 | 1.32E-04 | 1314 | 0.333333 | 3.262687 | 728172 | ATP6V0E1 |
| 1762.642 | -4354 | 1.32E-04 | 1302 | 0.333333 | 3.262687 | 712020 | DNAJA2   |
| 1750.952 | -4354 | 1.32E-04 | 1293 | 0.333333 | 3.262687 | 725294 | SEC23A   |
| 2131.214 | -4354 | 1.32E-04 | 1267 | 0.333333 | 3.262687 | 795224 | ORC3     |
| 1569.617 | -4354 | 1.32E-04 | 1262 | 0.333333 | 3.262687 | 739060 | ICOSLG   |
| 1539.898 | -4354 | 1.32E-04 | 1223 | 0.333333 | 3.262687 | 708298 | MGAT3    |
| 1623.176 | -4354 | 1.32E-04 | 1239 | 0.333333 | 3.262457 | 670270 | NODAL    |
| 1797.708 | -4354 | 1.32E-04 | 1193 | 0.333333 | 3.262457 | 740914 | TKFC     |
| 2053.601 | -4354 | 1.32E-04 | 1352 | 0.333333 | 3.262227 | 819468 | MKI67    |
| 2041.817 | -4354 | 1.32E-04 | 1272 | 0.333333 | 3.262227 | 790592 | FRS2     |
| 1289.322 | -4354 | 1.32E-04 | 1233 | 0.333333 | 3.262227 | 639292 | SRGN     |
| 1982.426 | -4354 | 1.32E-04 | 1317 | 0.333333 | 3.261998 | 815876 | CCNT1    |
| 1898.23  | -4354 | 1.32E-04 | 1293 | 0.333333 | 3.261998 | 774278 | CDC14A   |
| 1868.311 | -4354 | 1.32E-04 | 1236 | 0.333333 | 3.261998 | 745522 | TMED9    |
| 1841.942 | -4354 | 1.32E-04 | 1220 | 0.333333 | 3.261998 | 731178 | TECR     |
| 2665.571 | -4354 | 1.32E-04 | 1386 | 0.333333 | 3.261768 | 814394 | NDUFV1   |
| 1684.498 | -4354 | 1.32E-04 | 1326 | 0.333333 | 3.261768 | 715548 | CYP2E1   |
| 1691.217 | -4354 | 1.32E-04 | 1321 | 0.333333 | 3.261768 | 745744 | GNB4     |
| 2072.386 | -4354 | 1.32E-04 | 1315 | 0.333333 | 3.261768 | 757524 | SDHB     |
| 1579.673 | -4354 | 1.32E-04 | 1314 | 0.333333 | 3.261768 | 710644 | PTGDR2   |
| 1847.709 | -4354 | 1.32E-04 | 1263 | 0.333333 | 3.261768 | 756444 | TBC1D15  |

|          |       |          |      |          |          |        |         |
|----------|-------|----------|------|----------|----------|--------|---------|
| 1784.24  | -4354 | 1.32E-04 | 1211 | 0.333333 | 3.261768 | 762630 | DHX58   |
| 1589.111 | -4354 | 1.32E-04 | 1188 | 0.333333 | 3.261768 | 726842 | SSH3    |
| 1717.424 | -4354 | 1.32E-04 | 1185 | 0.333333 | 3.261768 | 739808 | MS4A14  |
| 2592.721 | -4354 | 1.32E-04 | 1318 | 0.333333 | 3.261538 | 816466 | NDUFA1  |
| 2073.05  | -4354 | 1.32E-04 | 1235 | 0.333333 | 3.261538 | 786062 | SLC27A5 |
| 1466.563 | -4354 | 1.32E-04 | 1235 | 0.333333 | 3.261538 | 675434 | MS4A7   |
| 1763.863 | -4354 | 1.32E-04 | 1214 | 0.333333 | 3.261538 | 728622 | FABP7   |
| 1978.658 | -4354 | 1.32E-04 | 1199 | 0.333333 | 3.261538 | 763110 | USP21   |
| 1735.052 | -4354 | 1.32E-04 | 1342 | 0.333333 | 3.261309 | 743982 | HLA-DOB |
| 2074.912 | -4354 | 1.32E-04 | 1285 | 0.333333 | 3.261309 | 810348 | CYP2R1  |
| 1814.017 | -4354 | 1.32E-04 | 1279 | 0.333333 | 3.261309 | 736168 | GPCPD1  |
| 2012.398 | -4354 | 1.32E-04 | 1252 | 0.333333 | 3.261309 | 802364 | ACTR3B  |
| 1655.659 | -4354 | 1.32E-04 | 1297 | 0.333333 | 3.261079 | 759212 | PRKAR2A |
| 1677.55  | -4354 | 1.32E-04 | 1238 | 0.333333 | 3.261079 | 752964 | TRAK1   |
| 1724.964 | -4354 | 1.32E-04 | 1318 | 0.333333 | 3.26085  | 760460 | AFDN    |
| 1883.301 | -4354 | 1.32E-04 | 1310 | 0.333333 | 3.26085  | 765568 | ISG15   |
| 1761.459 | -4354 | 1.32E-04 | 1299 | 0.333333 | 3.26085  | 719322 | TRAM1   |
| 1844.022 | -4354 | 1.32E-04 | 1240 | 0.333333 | 3.26085  | 745132 | KDM3A   |
| 1377.702 | -4354 | 1.32E-04 | 1222 | 0.333333 | 3.26085  | 653298 | NPC1L1  |
| 1751.69  | -4354 | 1.32E-04 | 1206 | 0.333333 | 3.26085  | 743998 | PDK2    |
| 1641.975 | -4354 | 1.32E-04 | 1182 | 0.333333 | 3.26062  | 734936 | METRNL  |
| 1525.735 | -4354 | 1.32E-04 | 1272 | 0.333333 | 3.26039  | 669010 | GBP1    |
| 1774.641 | -4354 | 1.32E-04 | 1251 | 0.333333 | 3.26039  | 702468 | DDOST   |
| 1856.585 | -4354 | 1.32E-04 | 1205 | 0.333333 | 3.26039  | 747162 | PPM1D   |
| 1882.94  | -4354 | 1.32E-04 | 1194 | 0.333333 | 3.26039  | 754664 | CASP14  |
| 1888.303 | -4354 | 1.32E-04 | 1381 | 0.333333 | 3.260161 | 752020 | MAP4K5  |
| 2060.265 | -4354 | 1.32E-04 | 1317 | 0.333333 | 3.260161 | 796594 | E2F5    |
| 1949.435 | -4354 | 1.32E-04 | 1271 | 0.333333 | 3.260161 | 746020 | ATF1    |
| 1815.297 | -4354 | 1.32E-04 | 1270 | 0.333333 | 3.260161 | 748734 | VAMP2   |
| 1733.434 | -4354 | 1.32E-04 | 1257 | 0.333333 | 3.260161 | 719076 | SOC55   |
| 1962.155 | -4354 | 1.32E-04 | 1206 | 0.333333 | 3.260161 | 774610 | DEGS2   |
| 1597.7   | -4354 | 1.32E-04 | 1504 | 0.333333 | 3.259931 | 724090 | GNG2    |
| 1738.132 | -4354 | 1.32E-04 | 1270 | 0.333333 | 3.259931 | 723126 | USP25   |
| 1924.018 | -4354 | 1.32E-04 | 1259 | 0.333333 | 3.259931 | 747072 | DBF4    |
| 1858.878 | -4354 | 1.32E-04 | 1348 | 0.333333 | 3.259701 | 744346 | PRKCI   |
| 1787.044 | -4354 | 1.32E-04 | 1301 | 0.333333 | 3.259701 | 740284 | VEZF1   |
| 1470.176 | -4354 | 1.32E-04 | 1291 | 0.333333 | 3.259701 | 684290 | WNT2B   |
| 1686.45  | -4354 | 1.32E-04 | 1259 | 0.333333 | 3.259701 | 705372 | NLGN4Y  |
| 2521.333 | -4354 | 1.32E-04 | 1468 | 0.333333 | 3.259472 | 756648 | UQCRC2  |
| 1838.443 | -4354 | 1.32E-04 | 1351 | 0.333333 | 3.259472 | 757782 | DVL3    |
| 1675.008 | -4354 | 1.32E-04 | 1297 | 0.333333 | 3.259472 | 733540 | ATF6    |



|          |       |          |      |          |          |         |         |
|----------|-------|----------|------|----------|----------|---------|---------|
| 1845.749 | -4354 | 1.32E-04 | 1258 | 0.333333 | 3.259472 | 768670  | PPP2R2D |
| 1671.414 | -4354 | 1.32E-04 | 1187 | 0.333333 | 3.259472 | 719294  | ESRRA   |
| 1874.878 | -4354 | 1.32E-04 | 1172 | 0.333333 | 3.259472 | 751210  | PRMT7   |
| 1503.566 | -4354 | 1.32E-04 | 1379 | 0.333333 | 3.259242 | 689964  | COL6A1  |
| 1834.772 | -4354 | 1.32E-04 | 1271 | 0.333333 | 3.259242 | 718700  | MYL10   |
| 1956.839 | -4354 | 1.32E-04 | 1229 | 0.333333 | 3.259242 | 794720  | DGKH    |
| 2079.367 | -4354 | 1.32E-04 | 1437 | 0.333333 | 3.259013 | 794888  | BRAF    |
| 2765.994 | -4354 | 1.32E-04 | 1527 | 0.333333 | 3.258783 | 810830  | ATP5PO  |
| 1620.825 | -4354 | 1.32E-04 | 1277 | 0.333333 | 3.258783 | 683128  | CACNA1G |
| 1435.601 | -4354 | 1.32E-04 | 1210 | 0.333333 | 3.258783 | 707898  | DUSP7   |
| 1913.933 | -4354 | 1.32E-04 | 1305 | 0.333333 | 3.258553 | 730330  | PPP2R5E |
| 1853.329 | -4354 | 1.32E-04 | 1357 | 0.333333 | 3.258324 | 702432  | CYP2C8  |
| 1838.565 | -4354 | 1.32E-04 | 1257 | 0.333333 | 3.258324 | 742568  | UBE3C   |
| 1401.504 | -4354 | 1.32E-04 | 1237 | 0.333333 | 3.258324 | 683022  | IRF5    |
| 1497.97  | -4354 | 1.32E-04 | 1206 | 0.333333 | 3.258324 | 646936  | P2RX6   |
| 1830.895 | -4354 | 1.32E-04 | 1305 | 0.333333 | 3.258094 | 744186  | RBL2    |
| 1584.516 | -4354 | 1.32E-04 | 1259 | 0.333333 | 3.258094 | 687316  | LAMP2   |
| 1681.936 | -4354 | 1.32E-04 | 1225 | 0.333333 | 3.258094 | 694624  | POU2F3  |
| 1472.86  | -4354 | 1.32E-04 | 1200 | 0.333333 | 3.258094 | 701556  | ITPK1   |
| 1403.248 | -4354 | 1.32E-04 | 1394 | 0.333333 | 3.257865 | 670890  | COL1A1  |
| 2103.049 | -4354 | 1.32E-04 | 1275 | 0.333333 | 3.257865 | 784072  | PIK3R4  |
| 1913.14  | -4354 | 1.32E-04 | 1208 | 0.333333 | 3.257865 | 715668  | PNCK    |
| 1746.969 | -4354 | 1.32E-04 | 1321 | 0.333333 | 3.257635 | 748918  | ARHGEF7 |
| 1747.416 | -4354 | 1.32E-04 | 1296 | 0.333333 | 3.257635 | 718272  | PPP1CB  |
| 1676.623 | -4354 | 1.32E-04 | 1279 | 0.333333 | 3.257635 | 707036  | RASGRF1 |
| 1305.003 | -4354 | 1.32E-04 | 1189 | 0.333333 | 3.257635 | 667634  | SEMA6A  |
| 3035.321 | -4354 | 1.32E-04 | 1160 | 0.333333 | 3.257635 | 1130722 | PPP1R3D |
| 1713.267 | -4354 | 1.32E-04 | 1158 | 0.333333 | 3.257635 | 723130  | CPT1C   |
| 1889.196 | -4354 | 1.32E-04 | 1350 | 0.333333 | 3.257405 | 752066  | FUS     |
| 1948.403 | -4354 | 1.32E-04 | 1311 | 0.333333 | 3.257405 | 734734  | DLAT    |
| 1633.58  | -4354 | 1.32E-04 | 1294 | 0.333333 | 3.257405 | 688436  | LATS2   |
| 1673.036 | -4354 | 1.32E-04 | 1243 | 0.333333 | 3.257405 | 700782  | GRK4    |
| 1773.634 | -4354 | 1.32E-04 | 1232 | 0.333333 | 3.257405 | 715912  | TAX1BP1 |
| 1509.46  | -4354 | 1.32E-04 | 1269 | 0.333333 | 3.257176 | 673808  | TRPA1   |
| 1740.358 | -4354 | 1.32E-04 | 1215 | 0.333333 | 3.257176 | 745156  | DLG3    |
| 2233.842 | -4354 | 1.32E-04 | 1174 | 0.333333 | 3.257176 | 712226  | VTI1B   |
| 1630.891 | -4354 | 1.32E-04 | 1156 | 0.333333 | 3.257176 | 694862  | COX4I2  |
| 1912.569 | -4354 | 1.32E-04 | 1289 | 0.333333 | 3.256946 | 743470  | PTPN2   |
| 1498.273 | -4354 | 1.32E-04 | 1228 | 0.333333 | 3.256946 | 691596  | KSR1    |
| 1760.039 | -4354 | 1.32E-04 | 1480 | 0.333333 | 3.256716 | 730892  | SMAD2   |
| 2409.129 | -4354 | 1.32E-04 | 1278 | 0.333333 | 3.256487 | 759824  | NDUFA13 |

|          |       |          |      |          |          |        |         |
|----------|-------|----------|------|----------|----------|--------|---------|
| 1740.992 | -4354 | 1.32E-04 | 1274 | 0.333333 | 3.256487 | 723478 | MTMR2   |
| 1637.729 | -4354 | 1.32E-04 | 1264 | 0.333333 | 3.256487 | 678736 | TNR     |
| 1524.209 | -4354 | 1.32E-04 | 1195 | 0.333333 | 3.256487 | 683328 | ALDH1L1 |
| 1403.819 | -4354 | 1.32E-04 | 1222 | 0.333333 | 3.256257 | 654148 | CCN4    |
| 1422.27  | -4354 | 1.32E-04 | 1220 | 0.333333 | 3.256257 | 659952 | CYTH4   |
| 1761.817 | -4354 | 1.32E-04 | 1346 | 0.333333 | 3.256028 | 709158 | ACO2    |
| 1979.823 | -4354 | 1.32E-04 | 1306 | 0.333333 | 3.256028 | 766628 | AP4S1   |
| 2216.205 | -4354 | 1.32E-04 | 1229 | 0.333333 | 3.256028 | 855816 | SRF     |
| 1737.047 | -4354 | 1.32E-04 | 1207 | 0.333333 | 3.256028 | 696202 | CA1     |
| 1802.565 | -4354 | 1.32E-04 | 1159 | 0.333333 | 3.256028 | 714894 | HACD3   |
| 1831.631 | -4354 | 1.32E-04 | 1317 | 0.333333 | 3.255798 | 705422 | MAP2K2  |
| 1558.571 | -4354 | 1.32E-04 | 1178 | 0.333333 | 3.255798 | 714188 | CDS1    |
| 1615.455 | -4354 | 1.32E-04 | 1329 | 0.333333 | 3.255568 | 672000 | MASP1   |
| 1639.513 | -4354 | 1.32E-04 | 1258 | 0.333333 | 3.255568 | 693842 | TRADD   |
| 2015.276 | -4354 | 1.32E-04 | 1312 | 0.333333 | 3.255339 | 711284 | TMED10  |
| 1633.083 | -4354 | 1.32E-04 | 1234 | 0.333333 | 3.255339 | 726874 | HSD17B1 |
| 1958.528 | -4354 | 1.32E-04 | 1314 | 0.333333 | 3.255109 | 747186 | TCF3    |
| 1718.752 | -4354 | 1.32E-04 | 1260 | 0.333333 | 3.255109 | 703932 | LRRC4C  |
| 1640.519 | -4354 | 1.32E-04 | 1183 | 0.333333 | 3.255109 | 718058 | BCL2L13 |
| 1992.582 | -4354 | 1.32E-04 | 1224 | 0.333333 | 3.254879 | 741830 | GORAB   |
| 2117.141 | -4354 | 1.32E-04 | 1189 | 0.333333 | 3.254879 | 686010 | IDH3G   |
| 1919.196 | -4354 | 1.32E-04 | 1352 | 0.333333 | 3.25465  | 748046 | ORC2    |
| 1731.835 | -4354 | 1.32E-04 | 1261 | 0.333333 | 3.25465  | 712270 | CFL2    |
| 1314.792 | -4354 | 1.32E-04 | 1249 | 0.333333 | 3.25465  | 648366 | FGF18   |
| 1839.489 | -4354 | 1.32E-04 | 1232 | 0.333333 | 3.25442  | 702372 | USP8    |
| 1499.048 | -4354 | 1.32E-04 | 1222 | 0.333333 | 3.25442  | 713622 | ENTPD4  |
| 2084.656 | -4354 | 1.32E-04 | 1188 | 0.333333 | 3.25442  | 765374 | ESPL1   |
| 1856.032 | -4354 | 1.32E-04 | 1304 | 0.333333 | 3.254191 | 748180 | XIAP    |
| 1603.597 | -4354 | 1.32E-04 | 1305 | 0.333333 | 3.253961 | 728868 | ABI2    |
| 1423.046 | -4354 | 1.32E-04 | 1273 | 0.333333 | 3.253961 | 625864 | CASR    |
| 1651.716 | -4354 | 1.32E-04 | 1351 | 0.333333 | 3.253731 | 701188 | RAB2A   |
| 1404.915 | -4354 | 1.32E-04 | 1246 | 0.333333 | 3.253731 | 674998 | CASP10  |
| 1540.687 | -4354 | 1.32E-04 | 1175 | 0.333333 | 3.253731 | 640724 | HOXA11  |
| 1973.443 | -4354 | 1.32E-04 | 1469 | 0.333333 | 3.253502 | 701910 | PSMD12  |
| 1764.952 | -4354 | 1.32E-04 | 1298 | 0.333333 | 3.253502 | 692506 | ATP5MC3 |
| 1636.97  | -4354 | 1.32E-04 | 1228 | 0.333333 | 3.253502 | 667594 | GH1     |
| 1385.113 | -4354 | 1.32E-04 | 1326 | 0.333333 | 3.253272 | 640344 | GRM5    |
| 1462.6   | -4354 | 1.32E-04 | 1280 | 0.333333 | 3.253272 | 663168 | ARF6    |
| 2368.37  | -4354 | 1.32E-04 | 1168 | 0.333333 | 3.253272 | 785926 | PCGF2   |
| 1456.965 | -4354 | 1.32E-04 | 1168 | 0.333333 | 3.253272 | 647384 | CYTH2   |
| 1792.349 | -4354 | 1.32E-04 | 1252 | 0.333333 | 3.253042 | 721442 | RRM2    |

|          |       |          |      |          |          |        |          |
|----------|-------|----------|------|----------|----------|--------|----------|
| 1263.073 | -4354 | 1.32E-04 | 1232 | 0.333333 | 3.253042 | 633016 | MS4A2    |
| 1673.094 | -4354 | 1.32E-04 | 1198 | 0.333333 | 3.253042 | 714596 | GALM     |
| 1947.524 | -4354 | 1.32E-04 | 1169 | 0.333333 | 3.253042 | 757464 | MBTPS2   |
| 1721.779 | -4354 | 1.32E-04 | 1166 | 0.333333 | 3.253042 | 659514 | IL17F    |
| 1608.883 | -4354 | 1.32E-04 | 1391 | 0.333333 | 3.252813 | 668148 | VDAC1    |
| 1771.722 | -4354 | 1.32E-04 | 1362 | 0.333333 | 3.252813 | 730034 | NCOR1    |
| 1870.454 | -4354 | 1.32E-04 | 1297 | 0.333333 | 3.252813 | 713386 | PPP3CB   |
| 1470.071 | -4354 | 1.32E-04 | 1244 | 0.333333 | 3.252813 | 668058 | SFRP2    |
| 1605.916 | -4354 | 1.32E-04 | 1194 | 0.333333 | 3.252813 | 691862 | FASN     |
| 1795.54  | -4354 | 1.31E-04 | 1380 | 0.333333 | 3.252583 | 676726 | PSMA7    |
| 1602.745 | -4354 | 1.31E-04 | 1176 | 0.333333 | 3.252583 | 721402 | IL20RB   |
| 1524.42  | -4354 | 1.31E-04 | 1320 | 0.333333 | 3.252354 | 638970 | CYP2C9   |
| 1534.411 | -4354 | 1.31E-04 | 1285 | 0.333333 | 3.252354 | 700704 | SRGAP1   |
| 2107.159 | -4354 | 1.31E-04 | 1269 | 0.333333 | 3.252354 | 723712 | CUL2     |
| 1624.73  | -4354 | 1.31E-04 | 1161 | 0.333333 | 3.252354 | 669820 | CYP4Z1   |
| 2116.391 | -4354 | 1.31E-04 | 1246 | 0.333333 | 3.252124 | 744760 | ATG4C    |
| 1497.846 | -4354 | 1.31E-04 | 1285 | 0.333333 | 3.251894 | 637610 | PTGER1   |
| 1957.068 | -4354 | 1.31E-04 | 1253 | 0.333333 | 3.251894 | 742634 | FXN      |
| 1734.767 | -4354 | 1.31E-04 | 1224 | 0.333333 | 3.251894 | 720624 | SLC7A1   |
| 1261.054 | -4354 | 1.31E-04 | 1259 | 0.333333 | 3.251665 | 623044 | SOCS3    |
| 1534.393 | -4354 | 1.31E-04 | 1207 | 0.333333 | 3.251665 | 690750 | MBTPS1   |
| 1537.94  | -4354 | 1.31E-04 | 1204 | 0.333333 | 3.251665 | 643156 | DMP1     |
| 1991.106 | -4354 | 1.31E-04 | 1194 | 0.333333 | 3.251665 | 730292 | TELO2    |
| 1531.733 | -4354 | 1.31E-04 | 1288 | 0.333333 | 3.251435 | 641290 | GRM8     |
| 1595.728 | -4354 | 1.31E-04 | 1246 | 0.333333 | 3.251435 | 706238 | ARHGAP35 |
| 1584.313 | -4354 | 1.31E-04 | 1207 | 0.333333 | 3.251435 | 656844 | APC2     |
| 1607.523 | -4354 | 1.31E-04 | 1195 | 0.333333 | 3.251435 | 720478 | WASL     |
| 1782.907 | -4354 | 1.31E-04 | 1266 | 0.333333 | 3.251206 | 702434 | SLC8A3   |
| 1566.027 | -4354 | 1.31E-04 | 1214 | 0.333333 | 3.251206 | 693732 | IQCE     |
| 1791.011 | -4354 | 1.31E-04 | 1213 | 0.333333 | 3.251206 | 686410 | RNF7     |
| 1964.749 | -4354 | 1.31E-04 | 1193 | 0.333333 | 3.251206 | 736680 | ASNS     |
| 1942.066 | -4354 | 1.31E-04 | 1174 | 0.333333 | 3.251206 | 729638 | PKN3     |
| 1297.773 | -4354 | 1.31E-04 | 1147 | 0.333333 | 3.251206 | 601182 | TRPM8    |
| 1444.476 | -4354 | 1.31E-04 | 1139 | 0.333333 | 3.251206 | 664800 | RGS14    |
| 1714.337 | -4354 | 1.31E-04 | 1252 | 0.333333 | 3.250746 | 668786 | COP1     |
| 1212.253 | -4354 | 1.31E-04 | 1141 | 0.333333 | 3.250746 | 615610 | SIGLEC1  |
| 1326.094 | -4354 | 1.31E-04 | 1244 | 0.333333 | 3.250517 | 632720 | TBXA2R   |
| 1856.211 | -4354 | 1.31E-04 | 1192 | 0.333333 | 3.250517 | 702224 | AP1G2    |
| 1720.027 | -4354 | 1.31E-04 | 1116 | 0.333333 | 3.250517 | 685618 | G6PC3    |
| 1292.274 | -4354 | 1.31E-04 | 1204 | 0.333333 | 3.250287 | 619666 | TPP1     |
| 1546.235 | -4354 | 1.31E-04 | 1186 | 0.333333 | 3.250287 | 656036 | DGKZ     |

|          |       |          |      |          |          |        |         |
|----------|-------|----------|------|----------|----------|--------|---------|
| 1702.061 | -4354 | 1.31E-04 | 1160 | 0.333333 | 3.250287 | 698924 | SLC19A1 |
| 1722.16  | -4354 | 1.31E-04 | 1252 | 0.333333 | 3.250057 | 692470 | PPP5C   |
| 1868.423 | -4354 | 1.31E-04 | 1241 | 0.333333 | 3.250057 | 723080 | CARD11  |
| 1419.654 | -4354 | 1.31E-04 | 1176 | 0.333333 | 3.250057 | 625776 | HOXD1   |
| 1303.224 | -4354 | 1.31E-04 | 1156 | 0.333333 | 3.250057 | 618530 | WNT7B   |
| 2180.385 | -4354 | 1.31E-04 | 1352 | 0.333333 | 3.249828 | 734318 | RPS27A  |
| 1516.4   | -4354 | 1.31E-04 | 1270 | 0.333333 | 3.249828 | 639546 | ATP2B2  |
| 1488.758 | -4354 | 1.31E-04 | 1203 | 0.333333 | 3.249828 | 629140 | CDH15   |
| 1404.057 | -4354 | 1.31E-04 | 1163 | 0.333333 | 3.249828 | 648420 | GLG1    |
| 1550.077 | -4354 | 1.31E-04 | 1234 | 0.333333 | 3.249598 | 633802 | MOB1A   |
| 1693.44  | -4354 | 1.31E-04 | 1221 | 0.333333 | 3.249598 | 683372 | WDR41   |
| 1379.891 | -4354 | 1.31E-04 | 1221 | 0.333333 | 3.249598 | 650338 | PAX8    |
| 1723.341 | -4354 | 1.31E-04 | 1210 | 0.333333 | 3.249598 | 691684 | NDRG3   |
| 1363.31  | -4354 | 1.31E-04 | 1183 | 0.333333 | 3.249598 | 640986 | ACSBG1  |
| 1859.199 | -4354 | 1.31E-04 | 1276 | 0.333333 | 3.249369 | 679570 | IDH3A   |
| 2005.763 | -4354 | 1.31E-04 | 1161 | 0.333333 | 3.249369 | 729858 | ACYP1   |
| 1592.01  | -4354 | 1.31E-04 | 1161 | 0.333333 | 3.249369 | 698624 | PER2    |
| 1483.792 | -4354 | 1.31E-04 | 1157 | 0.333333 | 3.249369 | 650724 | COMT    |
| 2370.427 | -4354 | 1.31E-04 | 1349 | 0.333333 | 3.249139 | 759328 | ANAPC4  |
| 1545.11  | -4354 | 1.31E-04 | 1282 | 0.333333 | 3.249139 | 684702 | DLL1    |
| 2563.843 | -4354 | 1.31E-04 | 1257 | 0.333333 | 3.249139 | 749608 | NDUFA3  |
| 1771.436 | -4354 | 1.31E-04 | 1230 | 0.333333 | 3.249139 | 676514 | ADH5    |
| 1835.385 | -4354 | 1.31E-04 | 1520 | 0.333333 | 3.24868  | 684334 | STAT1   |
| 1777.223 | -4354 | 1.31E-04 | 1312 | 0.333333 | 3.24868  | 692864 | STK11   |
| 1496.643 | -4354 | 1.31E-04 | 1198 | 0.333333 | 3.24822  | 638182 | CALML3  |
| 1384.478 | -4354 | 1.31E-04 | 1139 | 0.333333 | 3.24822  | 636138 | PRKAR1B |
| 2500.109 | -4354 | 1.31E-04 | 1131 | 0.333333 | 3.247761 | 774046 | PCGF1   |
| 1723.62  | -4354 | 1.31E-04 | 1427 | 0.333333 | 3.247532 | 691432 | SMAD4   |
| 1662.318 | -4354 | 1.31E-04 | 1277 | 0.333333 | 3.247532 | 706288 | PIAS2   |
| 1292.372 | -4354 | 1.31E-04 | 1275 | 0.333333 | 3.247532 | 614318 | CXCR6   |
| 1513.733 | -4354 | 1.31E-04 | 1245 | 0.333333 | 3.247532 | 622444 | CYP1A2  |
| 1840.397 | -4354 | 1.31E-04 | 1175 | 0.333333 | 3.247532 | 700328 | NOG     |
| 1576.163 | -4354 | 1.31E-04 | 1312 | 0.333333 | 3.247302 | 684448 | CRKL    |
| 1859.555 | -4354 | 1.31E-04 | 1277 | 0.333333 | 3.247302 | 711126 | KMT2A   |
| 1963.741 | -4354 | 1.31E-04 | 1231 | 0.333333 | 3.247072 | 693326 | BIRC6   |
| 1900.208 | -4354 | 1.31E-04 | 1220 | 0.333333 | 3.247072 | 691884 | EBP     |
| 1925.418 | -4354 | 1.31E-04 | 1198 | 0.333333 | 3.247072 | 719330 | UBIAD1  |
| 1703.995 | -4354 | 1.31E-04 | 1113 | 0.333333 | 3.247072 | 658462 | UBE2Q2  |
| 1946.412 | -4354 | 1.31E-04 | 1263 | 0.333333 | 3.246843 | 722416 | RPTOR   |
| 1559.091 | -4354 | 1.31E-04 | 1221 | 0.333333 | 3.246843 | 685256 | DUSP16  |
| 1480.047 | -4354 | 1.31E-04 | 1196 | 0.333333 | 3.246843 | 627426 | ATP2B3  |

|          |       |          |      |          |          |        |           |
|----------|-------|----------|------|----------|----------|--------|-----------|
| 1434.182 | -4354 | 1.31E-04 | 1169 | 0.333333 | 3.246843 | 651952 | SPN       |
| 1680.26  | -4354 | 1.31E-04 | 1166 | 0.333333 | 3.246613 | 652212 | CLDN18    |
| 1344.906 | -4354 | 1.31E-04 | 1261 | 0.333333 | 3.246383 | 602760 | FGF5      |
| 1525.962 | -4354 | 1.31E-04 | 1248 | 0.333333 | 3.246383 | 648412 | CALR      |
| 1863.47  | -4354 | 1.31E-04 | 1152 | 0.333333 | 3.246383 | 717612 | CENPJ     |
| 1921.891 | -4354 | 1.31E-04 | 1657 | 0.333333 | 3.246154 | 697002 | CDK1      |
| 1613.648 | -4354 | 1.31E-04 | 1233 | 0.333333 | 3.246154 | 657688 | SHC4      |
| 1440.985 | -4354 | 1.31E-04 | 1217 | 0.333333 | 3.246154 | 654498 | MID1      |
| 1659.95  | -4354 | 1.31E-04 | 1204 | 0.333333 | 3.246154 | 677016 | ELK1      |
| 1623.388 | -4354 | 1.31E-04 | 1164 | 0.333333 | 3.246154 | 647290 | SEC22B    |
| 1302.901 | -4354 | 1.31E-04 | 1147 | 0.333333 | 3.246154 | 593308 | IL11      |
| 1471.361 | -4354 | 1.31E-04 | 1122 | 0.333333 | 3.246154 | 672960 | DLG5      |
| 1631.895 | -4354 | 1.31E-04 | 1192 | 0.333333 | 3.245924 | 670852 | TXNRD2    |
| 1661.231 | -4354 | 1.31E-04 | 1132 | 0.333333 | 3.245924 | 649654 | PRKAG3    |
| 1789.833 | -4354 | 1.31E-04 | 1109 | 0.333333 | 3.245924 | 682548 | SLC2A11   |
| 1835.853 | -4354 | 1.31E-04 | 1261 | 0.333333 | 3.245695 | 685298 | SDHD      |
| 1371.76  | -4354 | 1.31E-04 | 1248 | 0.333333 | 3.245695 | 610074 | HTR7      |
| 1719.108 | -4354 | 1.31E-04 | 1193 | 0.333333 | 3.245695 | 674304 | AP1S1     |
| 1556.319 | -4354 | 1.31E-04 | 1190 | 0.333333 | 3.245695 | 666898 | ULK2      |
| 1404.247 | -4354 | 1.31E-04 | 1130 | 0.333333 | 3.245695 | 640384 | ZBP1      |
| 1253.397 | -4354 | 1.31E-04 | 1127 | 0.333333 | 3.245235 | 624966 | CDC14B    |
| 1582.518 | -4354 | 1.31E-04 | 1122 | 0.333333 | 3.245235 | 658250 | GGA3      |
| 1763.032 | -4354 | 1.31E-04 | 1258 | 0.333333 | 3.245006 | 657114 | SEH1L     |
| 1382.292 | -4354 | 1.31E-04 | 1170 | 0.333333 | 3.245006 | 637362 | IL27RA    |
| 1780.049 | -4354 | 1.31E-04 | 1155 | 0.333333 | 3.245006 | 693604 | CCNB3     |
| 1261.051 | -4354 | 1.31E-04 | 1107 | 0.333333 | 3.245006 | 559794 | SV2C      |
| 1707.284 | -4354 | 1.31E-04 | 1278 | 0.333333 | 3.244776 | 698622 | TP53BP1   |
| 1240.848 | -4354 | 1.31E-04 | 1212 | 0.333333 | 3.244776 | 563210 | MC2R      |
| 2680.247 | -4354 | 1.31E-04 | 1121 | 0.333333 | 3.244776 | 972480 | CHMP4C    |
| 1443.991 | -4354 | 1.31E-04 | 1189 | 0.333333 | 3.244546 | 652322 | CR2       |
| 1201.847 | -4354 | 1.31E-04 | 1160 | 0.333333 | 3.244546 | 596124 | FLT4      |
| 1448.824 | -4354 | 1.31E-04 | 1189 | 0.333333 | 3.244317 | 636274 | UBE2R2    |
| 1455.458 | -4354 | 1.31E-04 | 1155 | 0.333333 | 3.244317 | 633036 | RYK       |
| 1309.423 | -4354 | 1.31E-04 | 1077 | 0.333333 | 3.244317 | 579992 | COX6B2    |
| 1331.536 | -4354 | 1.31E-04 | 1183 | 0.333333 | 3.244087 | 579162 | ADH6      |
| 1723.591 | -4354 | 1.31E-04 | 1151 | 0.333333 | 3.244087 | 657196 | EIF2A     |
| 1704.86  | -4354 | 1.31E-04 | 1119 | 0.333333 | 3.244087 | 646304 | EI24      |
| 1590.783 | -4354 | 1.31E-04 | 1236 | 0.333333 | 3.243858 | 642724 | DAXX      |
| 1458.436 | -4354 | 1.31E-04 | 1197 | 0.333333 | 3.243858 | 645008 | TNFRSF10A |
| 1562.442 | -4354 | 1.31E-04 | 1185 | 0.333333 | 3.243858 | 633572 | NKX3-1    |
| 1603.822 | -4354 | 1.31E-04 | 1388 | 0.333333 | 3.243628 | 662298 | CREB1     |

|          |       |          |      |          |          |        |         |
|----------|-------|----------|------|----------|----------|--------|---------|
| 1602.659 | -4354 | 1.31E-04 | 1327 | 0.333333 | 3.243628 | 625958 | PSME3   |
| 1769.302 | -4354 | 1.31E-04 | 1215 | 0.333333 | 3.243628 | 665880 | TSC2    |
| 1902.599 | -4354 | 1.31E-04 | 1187 | 0.333333 | 3.243628 | 690312 | CBR4    |
| 1174.11  | -4354 | 1.31E-04 | 1120 | 0.333333 | 3.243398 | 581034 | RAPGEF3 |
| 1779.858 | -4354 | 1.31E-04 | 1086 | 0.333333 | 3.243398 | 693440 | ZNF41   |
| 1423.876 | -4354 | 1.31E-04 | 1311 | 0.333333 | 3.243169 | 610734 | HNF4A   |
| 1653.622 | -4354 | 1.31E-04 | 1172 | 0.333333 | 3.243169 | 648786 | NSDHL   |
| 1427.78  | -4354 | 1.31E-04 | 1212 | 0.333333 | 3.242939 | 631220 | PAX5    |
| 1468.52  | -4354 | 1.31E-04 | 1203 | 0.333333 | 3.242939 | 618234 | IL23A   |
| 1480.365 | -4354 | 1.31E-04 | 1187 | 0.333333 | 3.242939 | 628598 | PRKD3   |
| 1474.833 | -4354 | 1.31E-04 | 1108 | 0.333333 | 3.242939 | 653334 | FLCN    |
| 1377.025 | -4354 | 1.31E-04 | 1198 | 0.333333 | 3.24271  | 626614 | AGRN    |
| 1717.202 | -4354 | 1.31E-04 | 1188 | 0.333333 | 3.24271  | 643252 | RALBP1  |
| 1533.262 | -4354 | 1.31E-04 | 1121 | 0.333333 | 3.24271  | 587378 | MYLK3   |
| 1668.242 | -4354 | 1.31E-04 | 1165 | 0.333333 | 3.24248  | 659728 | RAB33B  |
| 1536.07  | -4354 | 1.31E-04 | 1128 | 0.333333 | 3.24248  | 662906 | MAP3K13 |
| 1418.433 | -4354 | 1.31E-04 | 1126 | 0.333333 | 3.24248  | 623844 | COQ10B  |
| 1530.384 | -4354 | 1.31E-04 | 1166 | 0.333333 | 3.24225  | 659200 | ZFYVE9  |
| 1155.954 | -4354 | 1.31E-04 | 1082 | 0.333333 | 3.24225  | 580932 | AKR1C1  |
| 1543.709 | -4354 | 1.31E-04 | 1185 | 0.333333 | 3.242021 | 647690 | FKBP4   |
| 1602.218 | -4354 | 1.31E-04 | 1174 | 0.333333 | 3.242021 | 628506 | CUL4B   |
| 1098.987 | -4354 | 1.31E-04 | 1159 | 0.333333 | 3.242021 | 579294 | MYH11   |
| 1552.879 | -4354 | 1.31E-04 | 1116 | 0.333333 | 3.242021 | 654994 | PCSK9   |
| 1781.83  | -4354 | 1.31E-04 | 1095 | 0.333333 | 3.242021 | 651466 | MCAT    |
| 1480.116 | -4354 | 1.31E-04 | 1164 | 0.333333 | 3.241791 | 655268 | CGN     |
| 1662.692 | -4354 | 1.31E-04 | 1155 | 0.333333 | 3.241791 | 647620 | MFN1    |
| 1410.668 | -4354 | 1.31E-04 | 1151 | 0.333333 | 3.241791 | 627708 | ZFYVE16 |
| 1253.987 | -4354 | 1.31E-04 | 1188 | 0.333333 | 3.241561 | 574744 | CSF2    |
| 1372.702 | -4354 | 1.31E-04 | 1103 | 0.333333 | 3.241561 | 593154 | ABCA2   |
| 1832.974 | -4354 | 1.31E-04 | 1195 | 0.333333 | 3.241332 | 691228 | VTI1A   |
| 1376.357 | -4354 | 1.31E-04 | 1141 | 0.333333 | 3.241332 | 619674 | RASGRP2 |
| 1136.838 | -4354 | 1.31E-04 | 1120 | 0.333333 | 3.241332 | 538294 | NR0B1   |
| 1405.209 | -4354 | 1.31E-04 | 1242 | 0.333333 | 3.241102 | 598822 | NOS1    |
| 1502.866 | -4354 | 1.31E-04 | 1165 | 0.333333 | 3.241102 | 629312 | JUND    |
| 1494.118 | -4354 | 1.31E-04 | 1194 | 0.333333 | 3.240873 | 636186 | CLN5    |
| 1618.338 | -4354 | 1.31E-04 | 1171 | 0.333333 | 3.240873 | 645622 | RXRB    |
| 1478.733 | -4354 | 1.31E-04 | 1141 | 0.333333 | 3.240873 | 620656 | SOST    |
| 1618.7   | -4354 | 1.31E-04 | 1140 | 0.333333 | 3.240873 | 656258 | SSX2IP  |
| 2138.727 | -4354 | 1.31E-04 | 1296 | 0.333333 | 3.240643 | 673180 | NDUFB9  |
| 1622.237 | -4354 | 1.31E-04 | 1233 | 0.333333 | 3.240643 | 644798 | PRKAA1  |
| 1445.08  | -4354 | 1.31E-04 | 1148 | 0.333333 | 3.240643 | 636246 | EOMES   |

|          |       |          |      |          |          |         |          |
|----------|-------|----------|------|----------|----------|---------|----------|
| 1533.074 | -4354 | 1.31E-04 | 1071 | 0.333333 | 3.240643 | 624030  | ACOT8    |
| 1474.691 | -4354 | 1.31E-04 | 1186 | 0.333333 | 3.240413 | 623580  | MYCN     |
| 1627.857 | -4354 | 1.31E-04 | 1371 | 0.333333 | 3.240184 | 618232  | PSMB7    |
| 1708.615 | -4354 | 1.31E-04 | 1304 | 0.333333 | 3.240184 | 650264  | SMC3     |
| 1048.985 | -4354 | 1.31E-04 | 1067 | 0.333333 | 3.240184 | 521354  | ALPG     |
| 1762.478 | -4354 | 1.31E-04 | 1330 | 0.333333 | 3.239954 | 662374  | ATF2     |
| 1443.899 | -4354 | 1.31E-04 | 1181 | 0.333333 | 3.239954 | 627298  | PCBP2    |
| 1622.958 | -4354 | 1.31E-04 | 1171 | 0.333333 | 3.239954 | 650332  | OSBPL5   |
| 3136.447 | -4354 | 1.31E-04 | 1147 | 0.333333 | 3.239954 | 1338872 | EIF4E2   |
| 1666.802 | -4354 | 1.30E-04 | 1209 | 0.333333 | 3.239265 | 654404  | TRIM37   |
| 1156.156 | -4354 | 1.30E-04 | 1195 | 0.333333 | 3.239265 | 564194  | COL4A6   |
| 1199.574 | -4354 | 1.30E-04 | 1174 | 0.333333 | 3.239036 | 594866  | NR4A1    |
| 1429.712 | -4354 | 1.30E-04 | 1154 | 0.333333 | 3.239036 | 585174  | CYP2B6   |
| 1517.124 | -4354 | 1.30E-04 | 1076 | 0.333333 | 3.239036 | 624214  | SLC51B   |
| 1785.972 | -4354 | 1.30E-04 | 1294 | 0.333333 | 3.238806 | 624616  | MDH2     |
| 1564.163 | -4354 | 1.30E-04 | 1181 | 0.333333 | 3.238806 | 634336  | HSD17B12 |
| 1714.152 | -4354 | 1.30E-04 | 1163 | 0.333333 | 3.238576 | 634164  | PLCZ1    |
| 1481.889 | -4354 | 1.30E-04 | 1133 | 0.333333 | 3.238576 | 613674  | RAB11B   |
| 1397.194 | -4354 | 1.30E-04 | 1111 | 0.333333 | 3.238576 | 598846  | IL22RA2  |
| 1158.766 | -4354 | 1.30E-04 | 1132 | 0.333333 | 3.238347 | 545908  | LAMP1    |
| 1293.346 | -4354 | 1.30E-04 | 1172 | 0.333333 | 3.238117 | 553840  | CYP2D6   |
| 1429.591 | -4354 | 1.30E-04 | 1144 | 0.333333 | 3.238117 | 611276  | PLXNA1   |
| 1876.956 | -4354 | 1.30E-04 | 1193 | 0.333333 | 3.237887 | 669148  | PAAF1    |
| 1423.692 | -4354 | 1.30E-04 | 1165 | 0.333333 | 3.237887 | 595128  | CYLD     |
| 1356.506 | -4354 | 1.30E-04 | 1159 | 0.333333 | 3.237887 | 597826  | ATP6V1D  |
| 2234.586 | -4354 | 1.30E-04 | 1145 | 0.333333 | 3.237887 | 857110  | BECN1    |
| 1322.765 | -4354 | 1.30E-04 | 1084 | 0.333333 | 3.237658 | 594532  | CTNS     |
| 1555.691 | -4354 | 1.30E-04 | 1131 | 0.333333 | 3.237428 | 647818  | CBY1     |
| 1167.608 | -4354 | 1.30E-04 | 1119 | 0.333333 | 3.237428 | 565100  | GPR161   |
| 1451.893 | -4354 | 1.30E-04 | 1054 | 0.333333 | 3.237428 | 580900  | IL27     |
| 1589.916 | -4354 | 1.30E-04 | 1208 | 0.333333 | 3.237199 | 628244  | ROBO2    |
| 1525.808 | -4354 | 1.30E-04 | 1197 | 0.333333 | 3.237199 | 646072  | SESN3    |
| 1285.269 | -4354 | 1.30E-04 | 1100 | 0.333333 | 3.237199 | 590772  | ATP2C2   |
| 1638.191 | -4354 | 1.30E-04 | 1089 | 0.333333 | 3.237199 | 644876  | PFKFB2   |
| 2041.895 | -4354 | 1.30E-04 | 1244 | 0.333333 | 3.236969 | 612740  | ATP5PB   |
| 1795.832 | -4354 | 1.30E-04 | 1120 | 0.333333 | 3.236739 | 643300  | PIAS4    |
| 1681.873 | -4354 | 1.30E-04 | 1061 | 0.333333 | 3.236739 | 648508  | ZNRF3    |
| 2231.656 | -4354 | 1.30E-04 | 1345 | 0.333333 | 3.23628  | 640296  | ATP5F1C  |
| 1541.986 | -4354 | 1.30E-04 | 1176 | 0.333333 | 3.23628  | 634592  | SETDB1   |
| 1629.773 | -4354 | 1.30E-04 | 1164 | 0.333333 | 3.23628  | 633042  | IP6K2    |
| 1364.07  | -4354 | 1.30E-04 | 1187 | 0.333333 | 3.236051 | 599222  | SNX18    |

|          |       |          |      |          |          |        |          |
|----------|-------|----------|------|----------|----------|--------|----------|
| 1215.238 | -4354 | 1.30E-04 | 1110 | 0.333333 | 3.236051 | 534802 | SULT2A1  |
| 1470.346 | -4354 | 1.30E-04 | 1126 | 0.333333 | 3.235821 | 598290 | NFKBIB   |
| 1538.57  | -4354 | 1.30E-04 | 1188 | 0.333333 | 3.235591 | 627844 | RAPGEF6  |
| 1120.309 | -4354 | 1.30E-04 | 1154 | 0.333333 | 3.235362 | 538650 | NCAM1    |
| 2733.955 | -4354 | 1.30E-04 | 1141 | 0.333333 | 3.235362 | 946834 | PLA2G12A |
| 1378.221 | -4354 | 1.30E-04 | 1106 | 0.333333 | 3.235362 | 601292 | HHATL    |
| 1502.874 | -4354 | 1.30E-04 | 1226 | 0.333333 | 3.235132 | 602144 | UBE2B    |
| 1590.029 | -4354 | 1.30E-04 | 1212 | 0.333333 | 3.235132 | 633384 | H2AX     |
| 1510.751 | -4354 | 1.30E-04 | 1096 | 0.333333 | 3.235132 | 624548 | ZNF257   |
| 1369.036 | -4354 | 1.30E-04 | 1163 | 0.333333 | 3.234902 | 542420 | CYP3A4   |
| 1650.683 | -4354 | 1.30E-04 | 1259 | 0.333333 | 3.234673 | 640588 | MCM4     |
| 1393.189 | -4354 | 1.30E-04 | 1142 | 0.333333 | 3.234673 | 584950 | RHEB     |
| 1462.176 | -4354 | 1.30E-04 | 1067 | 0.333333 | 3.234673 | 608662 | SQLE     |
| 1675.936 | -4354 | 1.30E-04 | 1045 | 0.333333 | 3.234673 | 575900 | MOGAT3   |
| 2039.057 | -4354 | 1.30E-04 | 1305 | 0.333333 | 3.234443 | 611832 | CYCS     |
| 1219.233 | -4354 | 1.30E-04 | 1103 | 0.333333 | 3.234443 | 523288 | ADCY10   |
| 1213.104 | -4354 | 1.30E-04 | 1064 | 0.333333 | 3.234443 | 587322 | MYCL     |
| 1336.255 | -4354 | 1.30E-04 | 1038 | 0.333333 | 3.234443 | 605224 | RUBCN    |
| 1541.937 | -4354 | 1.30E-04 | 1151 | 0.333333 | 3.234214 | 620618 | ACVR1C   |
| 1442.188 | -4354 | 1.30E-04 | 1150 | 0.333333 | 3.233984 | 615946 | NFATC3   |
| 1208.282 | -4354 | 1.30E-04 | 1133 | 0.333333 | 3.233984 | 553182 | EFNB3    |
| 1577.966 | -4354 | 1.30E-04 | 1098 | 0.333333 | 3.233984 | 631810 | UBE3B    |
| 1297.801 | -4354 | 1.30E-04 | 1095 | 0.333333 | 3.233984 | 561430 | YKT6     |
| 1497.598 | -4354 | 1.30E-04 | 1148 | 0.333333 | 3.233754 | 609664 | KAT6A    |
| 1478.203 | -4354 | 1.30E-04 | 1129 | 0.333333 | 3.233754 | 609496 | BAG4     |
| 1557.25  | -4354 | 1.30E-04 | 1125 | 0.333333 | 3.233754 | 624506 | CCL26    |
| 1511.584 | -4354 | 1.30E-04 | 1064 | 0.333333 | 3.233754 | 576518 | IL1F10   |
| 1330.275 | -4354 | 1.30E-04 | 1107 | 0.333333 | 3.233525 | 580172 | CD6      |
| 1249.843 | -4354 | 1.30E-04 | 1084 | 0.333333 | 3.233525 | 535228 | IL20     |
| 1732.548 | -4354 | 1.30E-04 | 1239 | 0.333333 | 3.233065 | 608124 | EIF2S2   |
| 1729.071 | -4354 | 1.30E-04 | 1137 | 0.333333 | 3.233065 | 634766 | CCNE2    |
| 1043.48  | -4354 | 1.30E-04 | 1135 | 0.333333 | 3.233065 | 529316 | KCNJ5    |
| 1173.294 | -4354 | 1.30E-04 | 1065 | 0.333333 | 3.233065 | 558322 | NCR3     |
| 1546.794 | -4354 | 1.30E-04 | 1042 | 0.333333 | 3.233065 | 617938 | A1BG     |
| 1206.497 | -4354 | 1.30E-04 | 1118 | 0.333333 | 3.232836 | 576880 | CD22     |
| 1668.202 | -4354 | 1.30E-04 | 1044 | 0.333333 | 3.232836 | 635940 | DFFB     |
| 1502.026 | -4354 | 1.30E-04 | 1252 | 0.333333 | 3.232377 | 565296 | UBE2D3   |
| 1380.743 | -4354 | 1.30E-04 | 1125 | 0.333333 | 3.232377 | 573194 | RBCK1    |
| 1477.648 | -4354 | 1.30E-04 | 1123 | 0.333333 | 3.232377 | 597778 | GCDH     |
| 1279.899 | -4354 | 1.30E-04 | 1228 | 0.333333 | 3.232147 | 552084 | RAB5A    |
| 1426.691 | -4354 | 1.30E-04 | 1098 | 0.333333 | 3.232147 | 599430 | ATF6B    |



|          |       |          |      |          |          |        |          |
|----------|-------|----------|------|----------|----------|--------|----------|
| 1777.841 | -4354 | 1.30E-04 | 1233 | 0.333333 | 3.231917 | 617990 | CDC16    |
| 1276.792 | -4354 | 1.30E-04 | 1059 | 0.333333 | 3.231917 | 577700 | LSS      |
| 1430.314 | -4354 | 1.30E-04 | 1176 | 0.333333 | 3.231688 | 554916 | RAB11A   |
| 1208.638 | -4354 | 1.30E-04 | 1157 | 0.333333 | 3.231688 | 528884 | GFAP     |
| 1509.672 | -4354 | 1.30E-04 | 1168 | 0.333333 | 3.231458 | 603668 | UBE2W    |
| 1388.426 | -4354 | 1.30E-04 | 1053 | 0.333333 | 3.231458 | 545512 | IFNE     |
| 1144.928 | -4354 | 1.30E-04 | 1030 | 0.333333 | 3.231458 | 527866 | FNIP2    |
| 1396.127 | -4354 | 1.30E-04 | 1265 | 0.333333 | 3.231228 | 541018 | PSMD13   |
| 1480.163 | -4354 | 1.30E-04 | 1143 | 0.333333 | 3.231228 | 593798 | PPM1A    |
| 1440.944 | -4354 | 1.30E-04 | 1137 | 0.333333 | 3.230999 | 604828 | CPLX1    |
| 1438.817 | -4354 | 1.30E-04 | 1133 | 0.333333 | 3.230999 | 598206 | PPIL2    |
| 1067.949 | -4354 | 1.30E-04 | 1124 | 0.333333 | 3.230999 | 512992 | CYBB     |
| 986.572  | -4354 | 1.30E-04 | 1019 | 0.333333 | 3.230999 | 472106 | SSX2B    |
| 1135.846 | -4354 | 1.30E-04 | 1220 | 0.333333 | 3.230769 | 534294 | GRM1     |
| 1576.179 | -4354 | 1.30E-04 | 1017 | 0.333333 | 3.230769 | 603262 | SLC23A1  |
| 1550.089 | -4354 | 1.30E-04 | 1261 | 0.333333 | 3.23054  | 607676 | CCNA2    |
| 1578.857 | -4354 | 1.30E-04 | 1244 | 0.333333 | 3.23054  | 604208 | UBE2I    |
| 1480.022 | -4354 | 1.30E-04 | 1187 | 0.333333 | 3.23054  | 578728 | UBR5     |
| 1391.789 | -4354 | 1.30E-04 | 1171 | 0.333333 | 3.23031  | 583074 | LPAR5    |
| 1494.642 | -4354 | 1.30E-04 | 1122 | 0.333333 | 3.23031  | 615770 | REST     |
| 1559.233 | -4354 | 1.30E-04 | 1102 | 0.333333 | 3.23031  | 606128 | HUS1     |
| 1368.918 | -4354 | 1.30E-04 | 1054 | 0.333333 | 3.23008  | 541228 | LYPLA1   |
| 1459.506 | -4354 | 1.30E-04 | 1148 | 0.333333 | 3.229851 | 603350 | DIAPH3   |
| 1179.871 | -4354 | 1.30E-04 | 1137 | 0.333333 | 3.229851 | 535506 | EDA      |
| 1340.552 | -4354 | 1.30E-04 | 1121 | 0.333333 | 3.229851 | 594788 | SPATA13  |
| 1510.607 | -4354 | 1.30E-04 | 1074 | 0.333333 | 3.229851 | 609824 | DISP1    |
| 989.9496 | -4354 | 1.30E-04 | 1063 | 0.333333 | 3.229851 | 496402 | IGSF9B   |
| 1366.824 | -4354 | 1.30E-04 | 1156 | 0.333333 | 3.229621 | 596754 | RASGRF2  |
| 1186.511 | -4354 | 1.30E-04 | 1125 | 0.333333 | 3.229621 | 534304 | PARVG    |
| 1294.236 | -4354 | 1.30E-04 | 1100 | 0.333333 | 3.229621 | 585212 | SEMA4F   |
| 1769.417 | -4354 | 1.30E-04 | 1258 | 0.333333 | 3.229392 | 624082 | CDC25A   |
| 1490.684 | -4354 | 1.30E-04 | 1184 | 0.333333 | 3.229392 | 586674 | ELAVL1   |
| 1403.037 | -4354 | 1.30E-04 | 1093 | 0.333333 | 3.229392 | 568074 | GORASP2  |
| 1631.717 | -4354 | 1.30E-04 | 1197 | 0.333333 | 3.229162 | 614644 | MED1     |
| 1515.1   | -4354 | 1.30E-04 | 1074 | 0.333333 | 3.229162 | 581424 | PRMT6    |
| 1183.029 | -4354 | 1.30E-04 | 1012 | 0.333333 | 3.229162 | 546724 | HGSNAT   |
| 1555.013 | -4354 | 1.30E-04 | 1092 | 0.333333 | 3.228703 | 582022 | FUNDCl   |
| 1246.539 | -4354 | 1.30E-04 | 1028 | 0.333333 | 3.228703 | 519244 | ATP6V1G3 |
| 1190.13  | -4354 | 1.30E-04 | 1142 | 0.333333 | 3.228473 | 546760 | ITGA2B   |
| 985.9227 | -4354 | 1.30E-04 | 1070 | 0.333333 | 3.228473 | 502484 | CHRNA1   |
| 2163.113 | -4354 | 1.30E-04 | 1188 | 0.333333 | 3.228243 | 639506 | NDUFA7   |

|          |       |          |      |          |          |         |          |
|----------|-------|----------|------|----------|----------|---------|----------|
| 1104.53  | -4354 | 1.30E-04 | 1180 | 0.333333 | 3.228243 | 525322  | HLA-DOA  |
| 1323.855 | -4354 | 1.30E-04 | 1077 | 0.333333 | 3.228243 | 558640  | ZBTB7A   |
| 1190.861 | -4354 | 1.30E-04 | 1120 | 0.333333 | 3.228014 | 539368  | CACNB1   |
| 935.031  | -4354 | 1.30E-04 | 1126 | 0.333333 | 3.227784 | 497068  | LAMA2    |
| 1014.426 | -4354 | 1.30E-04 | 1079 | 0.333333 | 3.227784 | 516770  | RUNX2    |
| 1113.269 | -4354 | 1.30E-04 | 1071 | 0.333333 | 3.227784 | 528322  | BAIAP2   |
| 2036.437 | -4354 | 1.30E-04 | 1289 | 0.333333 | 3.227555 | 621532  | NDUFS4   |
| 1525.136 | -4354 | 1.30E-04 | 1111 | 0.333333 | 3.227555 | 565020  | RHOT2    |
| 1497.378 | -4354 | 1.30E-04 | 1075 | 0.333333 | 3.227555 | 590948  | UBE2O    |
| 1066.21  | -4354 | 1.30E-04 | 1055 | 0.333333 | 3.227555 | 529674  | ARHGAP1  |
| 1402.002 | -4354 | 1.30E-04 | 1054 | 0.333333 | 3.227555 | 593848  | AP3M2    |
| 1094.049 | -4354 | 1.30E-04 | 1030 | 0.333333 | 3.227555 | 499342  | SEMA4G   |
| 1621.464 | -4354 | 1.30E-04 | 1158 | 0.333333 | 3.227325 | 578554  | PPID     |
| 10241.73 | -4354 | 1.30E-04 | 1099 | 0.333333 | 3.227325 | 2500892 | RPE      |
| 1417.511 | -4354 | 1.30E-04 | 1099 | 0.333333 | 3.227095 | 576178  | RNF152   |
| 1249.606 | -4354 | 1.30E-04 | 1058 | 0.333333 | 3.227095 | 555800  | TNFRSF18 |
| 1514.312 | -4354 | 1.30E-04 | 1267 | 0.333333 | 3.226866 | 568264  | FH       |
| 1450.025 | -4354 | 1.30E-04 | 1211 | 0.333333 | 3.226866 | 573158  | PSMF1    |
| 1057.749 | -4354 | 1.30E-04 | 1042 | 0.333333 | 3.226866 | 507702  | ASAH1    |
| 1136.814 | -4354 | 1.30E-04 | 1145 | 0.333333 | 3.226636 | 494552  | RHO      |
| 2590.878 | -4354 | 1.30E-04 | 1126 | 0.333333 | 3.226636 | 655150  | ATP5MF   |
| 1246.593 | -4354 | 1.30E-04 | 1080 | 0.333333 | 3.226636 | 538208  | ARHGAP5  |
| 1002.128 | -4354 | 1.30E-04 | 1000 | 0.333333 | 3.226636 | 511526  | GXYLT2   |
| 1457.609 | -4354 | 1.30E-04 | 1169 | 0.333333 | 3.226406 | 586154  | CCNB2    |
| 1146.627 | -4354 | 1.30E-04 | 1097 | 0.333333 | 3.226406 | 520188  | MPL      |
| 1394.306 | -4354 | 1.30E-04 | 1043 | 0.333333 | 3.226406 | 530796  | ABCG8    |
| 1128.538 | -4354 | 1.30E-04 | 1034 | 0.333333 | 3.226406 | 502130  | RSPO1    |
| 1661.903 | -4354 | 1.30E-04 | 1243 | 0.333333 | 3.226177 | 586410  | ATR      |
| 1311.761 | -4354 | 1.30E-04 | 1138 | 0.333333 | 3.225947 | 542018  | RAB14    |
| 1398.431 | -4354 | 1.30E-04 | 1114 | 0.333333 | 3.225947 | 558758  | MAPK8IP3 |
| 1315.723 | -4354 | 1.30E-04 | 1057 | 0.333333 | 3.225947 | 551792  | TFG      |
| 1640.533 | -4354 | 1.30E-04 | 996  | 0.333333 | 3.225947 | 606186  | DND1     |
| 1304.976 | -4354 | 1.30E-04 | 1131 | 0.333333 | 3.225718 | 563976  | FBXO32   |
| 1128.16  | -4354 | 1.30E-04 | 1112 | 0.333333 | 3.225718 | 486616  | ALDOB    |
| 1309.499 | -4354 | 1.30E-04 | 1046 | 0.333333 | 3.225718 | 557174  | BATF2    |
| 1167.472 | -4354 | 1.30E-04 | 1034 | 0.333333 | 3.225718 | 527218  | ATG13    |
| 1323.391 | -4354 | 1.30E-04 | 1022 | 0.333333 | 3.225718 | 528892  | PPP2R3C  |
| 1333.135 | -4354 | 1.29E-04 | 1025 | 0.333333 | 3.225488 | 557360  | PPP2R3B  |
| 1045.296 | -4354 | 1.29E-04 | 1012 | 0.333333 | 3.225258 | 497034  | TWIST2   |
| 1495.326 | -4354 | 1.29E-04 | 1108 | 0.333333 | 3.225029 | 589726  | TBC1D7   |
| 1414.341 | -4354 | 1.29E-04 | 1067 | 0.333333 | 3.225029 | 564276  | MYBBP1A  |

|          |       |          |      |          |          |         |         |
|----------|-------|----------|------|----------|----------|---------|---------|
| 1869.672 | -4354 | 1.29E-04 | 1104 | 0.333333 | 3.224799 | 623284  | COX17   |
| 1030.337 | -4354 | 1.29E-04 | 1059 | 0.333333 | 3.224799 | 469930  | IL17A   |
| 1961.598 | -4354 | 1.29E-04 | 1016 | 0.333333 | 3.224799 | 612544  | DTX3L   |
| 1419.35  | -4354 | 1.29E-04 | 1105 | 0.333333 | 3.22434  | 590244  | INPP5B  |
| 1356.481 | -4354 | 1.29E-04 | 1227 | 0.333333 | 3.22411  | 540732  | PSMD9   |
| 1509.784 | -4354 | 1.29E-04 | 1160 | 0.333333 | 3.22411  | 553838  | HSPA4   |
| 1045.388 | -4354 | 1.29E-04 | 1156 | 0.333333 | 3.22411  | 474484  | AVPR2   |
| 1366.034 | -4354 | 1.29E-04 | 1140 | 0.333333 | 3.22411  | 528884  | UBE2L3  |
| 1641.977 | -4354 | 1.29E-04 | 1033 | 0.333333 | 3.223881 | 598530  | MAGEE1  |
| 1496.233 | -4354 | 1.29E-04 | 1220 | 0.333333 | 3.223651 | 597148  | RBL1    |
| 1323.517 | -4354 | 1.29E-04 | 1024 | 0.333333 | 3.223651 | 495228  | WNT8A   |
| 1031.526 | -4354 | 1.29E-04 | 1037 | 0.333333 | 3.223421 | 457828  | ABCB11  |
| 1216.278 | -4354 | 1.29E-04 | 1045 | 0.333333 | 3.223192 | 510840  | MINK1   |
| 1565.925 | -4354 | 1.29E-04 | 992  | 0.333333 | 3.223192 | 569104  | PRRT2   |
| 1389.69  | -4354 | 1.29E-04 | 1066 | 0.333333 | 3.222962 | 525098  | FOXP3   |
| 1035.399 | -4354 | 1.29E-04 | 1049 | 0.333333 | 3.222732 | 480636  | BMP8A   |
| 1081.257 | -4354 | 1.29E-04 | 1148 | 0.333333 | 3.222503 | 485074  | PGK1    |
| 1153.455 | -4354 | 1.29E-04 | 1079 | 0.333333 | 3.222503 | 488176  | EPO     |
| 1174.803 | -4354 | 1.29E-04 | 1041 | 0.333333 | 3.222503 | 493682  | SLITRK2 |
| 1540.273 | -4354 | 1.29E-04 | 1228 | 0.333333 | 3.222273 | 556516  | CUL3    |
| 1296.571 | -4354 | 1.29E-04 | 1081 | 0.333333 | 3.221814 | 559036  | PIP4K2B |
| 1348.798 | -4354 | 1.29E-04 | 1076 | 0.333333 | 3.221584 | 536582  | MTA1    |
| 1139.113 | -4354 | 1.29E-04 | 996  | 0.333333 | 3.221584 | 492970  | JMJD1C  |
| 1366.101 | -4354 | 1.29E-04 | 1157 | 0.333333 | 3.221355 | 521484  | VDAC3   |
| 1098.201 | -4354 | 1.29E-04 | 1164 | 0.333333 | 3.221125 | 473256  | RAB1A   |
| 1021.309 | -4354 | 1.29E-04 | 1023 | 0.333333 | 3.221125 | 489856  | CARD10  |
| 1446.954 | -4354 | 1.29E-04 | 1106 | 0.333333 | 3.220896 | 532686  | EIF5    |
| 1002.697 | -4354 | 1.29E-04 | 1030 | 0.333333 | 3.220896 | 477816  | SLC11A1 |
| 1906.908 | -4354 | 1.29E-04 | 1175 | 0.333333 | 3.220666 | 562722  | NDUFA12 |
| 1287.284 | -4354 | 1.29E-04 | 1089 | 0.333333 | 3.220666 | 524820  | PA2G4   |
| 1098.87  | -4354 | 1.29E-04 | 1061 | 0.333333 | 3.220666 | 513416  | IRF4    |
| 1465.942 | -4354 | 1.29E-04 | 1062 | 0.333333 | 3.220436 | 549450  | INHBC   |
| 3213.134 | -4354 | 1.29E-04 | 1154 | 0.333333 | 3.220207 | 1241024 | EIF4E   |
| 1444.036 | -4354 | 1.29E-04 | 1061 | 0.333333 | 3.220207 | 551780  | BRAP    |
| 1110.728 | -4354 | 1.29E-04 | 1012 | 0.333333 | 3.220207 | 510138  | LRRC8A  |
| 1014.856 | -4354 | 1.29E-04 | 985  | 0.333333 | 3.220207 | 487006  | ORAI2   |
| 1250.73  | -4354 | 1.29E-04 | 1016 | 0.333333 | 3.219977 | 535678  | REPIN1  |
| 1261.054 | -4354 | 1.29E-04 | 1027 | 0.333333 | 3.219747 | 514476  | UBE2F   |
| 1107.371 | -4354 | 1.29E-04 | 1049 | 0.333333 | 3.219518 | 499648  | HRK     |
| 1332.855 | -4354 | 1.29E-04 | 1042 | 0.333333 | 3.219518 | 536198  | RASSF6  |
| 1259.876 | -4354 | 1.29E-04 | 968  | 0.333333 | 3.219518 | 481474  | RP1L1   |

|          |       |          |      |          |          |        |         |
|----------|-------|----------|------|----------|----------|--------|---------|
| 1180.866 | -4354 | 1.29E-04 | 1052 | 0.333333 | 3.219288 | 504212 | SNAP29  |
| 986.7891 | -4354 | 1.29E-04 | 1045 | 0.333333 | 3.219288 | 462570 | PDE1C   |
| 1398.686 | -4354 | 1.29E-04 | 1179 | 0.333333 | 3.219059 | 536268 | FZR1    |
| 1826.34  | -4354 | 1.29E-04 | 1045 | 0.333333 | 3.219059 | 561910 | PSMA8   |
| 1925.374 | -4354 | 1.29E-04 | 1032 | 0.333333 | 3.219059 | 605778 | UBOX5   |
| 1099.477 | -4354 | 1.29E-04 | 1008 | 0.333333 | 3.219059 | 506890 | MTHFR   |
| 890.5803 | -4354 | 1.29E-04 | 1005 | 0.333333 | 3.219059 | 448498 | DLL3    |
| 1193.451 | -4354 | 1.29E-04 | 999  | 0.333333 | 3.219059 | 516158 | ABCB9   |
| 1237.485 | -4354 | 1.29E-04 | 1103 | 0.333333 | 3.218599 | 504164 | CTBP1   |
| 1234.716 | -4354 | 1.29E-04 | 1078 | 0.333333 | 3.218599 | 532056 | SPOP    |
| 1152.72  | -4354 | 1.29E-04 | 975  | 0.333333 | 3.218599 | 459626 | SSX1    |
| 1247.082 | -4354 | 1.29E-04 | 1060 | 0.333333 | 3.21837  | 509776 | APPL1   |
| 1290.547 | -4354 | 1.29E-04 | 1055 | 0.333333 | 3.21837  | 500684 | RPS6KA6 |
| 1287.797 | -4354 | 1.29E-04 | 987  | 0.333333 | 3.21837  | 482882 | KRT71   |
| 1277.142 | -4354 | 1.29E-04 | 1112 | 0.333333 | 3.21814  | 509348 | PPM1B   |
| 1430.234 | -4354 | 1.29E-04 | 1144 | 0.333333 | 3.21791  | 505332 | ELOC    |
| 1423.393 | -4354 | 1.29E-04 | 1014 | 0.333333 | 3.21791  | 527902 | SYMPK   |
| 1424.615 | -4354 | 1.29E-04 | 1043 | 0.333333 | 3.217681 | 506292 | DAP3    |
| 1196.123 | -4354 | 1.29E-04 | 1043 | 0.333333 | 3.217681 | 518392 | AJUBA   |
| 1513.708 | -4354 | 1.29E-04 | 1105 | 0.333333 | 3.217451 | 495506 | IDH3B   |
| 1512.068 | -4354 | 1.29E-04 | 1088 | 0.333333 | 3.217451 | 551244 | DAB2IP  |
| 1441.301 | -4354 | 1.29E-04 | 1082 | 0.333333 | 3.217451 | 534996 | BRK1    |
| 1013.09  | -4354 | 1.29E-04 | 1045 | 0.333333 | 3.217451 | 459528 | LAMB4   |
| 966.4853 | -4354 | 1.29E-04 | 996  | 0.333333 | 3.217451 | 449952 | SYN2    |
| 1056.475 | -4354 | 1.29E-04 | 963  | 0.333333 | 3.217451 | 469366 | LPIN3   |
| 1209.718 | -4354 | 1.29E-04 | 1088 | 0.333333 | 3.217222 | 509238 | EWSR1   |
| 1107.696 | -4354 | 1.29E-04 | 996  | 0.333333 | 3.217222 | 481856 | CLTB    |
| 1537.357 | -4354 | 1.29E-04 | 1051 | 0.333333 | 3.216992 | 550076 | PARP2   |
| 875.4907 | -4354 | 1.29E-04 | 1027 | 0.333333 | 3.216992 | 441584 | KCNJ1   |
| 1473.752 | -4354 | 1.29E-04 | 997  | 0.333333 | 3.216992 | 490366 | IDUA    |
| 1778.184 | -4354 | 1.29E-04 | 1062 | 0.333333 | 3.216533 | 582226 | PGAM5   |
| 1333.33  | -4354 | 1.29E-04 | 1002 | 0.333333 | 3.216533 | 480344 | SNX4    |
| 1824.161 | -4354 | 1.29E-04 | 1142 | 0.333333 | 3.216073 | 546564 | NDUFB6  |
| 1082.811 | -4354 | 1.29E-04 | 971  | 0.333333 | 3.216073 | 464508 | MGAT2   |
| 1194.069 | -4354 | 1.29E-04 | 957  | 0.333333 | 3.216073 | 492120 | LAMTOR4 |
| 1162.482 | -4354 | 1.29E-04 | 1057 | 0.333333 | 3.215844 | 490624 | ACBD3   |
| 1396.718 | -4354 | 1.29E-04 | 1204 | 0.333333 | 3.215385 | 510276 | SKP1    |
| 1399.043 | -4354 | 1.29E-04 | 1073 | 0.333333 | 3.215155 | 535696 | AXIN2   |
| 1484.43  | -4354 | 1.29E-04 | 1024 | 0.333333 | 3.215155 | 490826 | GRK7    |
| 1289.668 | -4354 | 1.29E-04 | 1021 | 0.333333 | 3.214925 | 542910 | NRF1    |
| 1407.497 | -4354 | 1.29E-04 | 1017 | 0.333333 | 3.214696 | 528960 | HMBX1   |

|          |       |          |      |          |          |        |          |
|----------|-------|----------|------|----------|----------|--------|----------|
| 1637.6   | -4354 | 1.29E-04 | 1059 | 0.333333 | 3.214466 | 567620 | EIF3C    |
| 1294.975 | -4354 | 1.29E-04 | 1031 | 0.333333 | 3.214466 | 521274 | UBE2G2   |
| 1476.18  | -4354 | 1.29E-04 | 1130 | 0.333333 | 3.214237 | 504154 | ANAPC10  |
| 1167.066 | -4354 | 1.29E-04 | 1053 | 0.333333 | 3.214237 | 510554 | WNT10A   |
| 1522.523 | -4354 | 1.29E-04 | 1188 | 0.333333 | 3.214007 | 557294 | RUNX1    |
| 1138.212 | -4354 | 1.29E-04 | 1066 | 0.333333 | 3.214007 | 480040 | IL5RA    |
| 908.9684 | -4354 | 1.29E-04 | 1034 | 0.333333 | 3.214007 | 415718 | THPO     |
| 1117.969 | -4354 | 1.29E-04 | 1030 | 0.333333 | 3.214007 | 479158 | ATP6V1C1 |
| 1047.808 | -4354 | 1.29E-04 | 985  | 0.333333 | 3.213777 | 471096 | DBP      |
| 1074.561 | -4354 | 1.29E-04 | 946  | 0.333333 | 3.213777 | 453648 | ACOT12   |
| 1014.917 | -4354 | 1.29E-04 | 985  | 0.333333 | 3.213548 | 441004 | ABO      |
| 1495.283 | -4354 | 1.29E-04 | 1247 | 0.333333 | 3.213318 | 529708 | AURKA    |
| 1262.433 | -4354 | 1.29E-04 | 1085 | 0.333333 | 3.213318 | 499518 | SMARCC2  |
| 2017.939 | -4354 | 1.29E-04 | 1031 | 0.333333 | 3.213318 | 554098 | ATP5ME   |
| 1216.536 | -4354 | 1.29E-04 | 1099 | 0.333333 | 3.213088 | 519518 | CASP2    |
| 1177.774 | -4354 | 1.29E-04 | 1036 | 0.333333 | 3.213088 | 512770 | STIM2    |
| 1230.969 | -4354 | 1.29E-04 | 1000 | 0.333333 | 3.213088 | 513802 | SRGAP2   |
| 982.4498 | -4354 | 1.29E-04 | 971  | 0.333333 | 3.213088 | 466256 | SLC35A2  |
| 1202.523 | -4354 | 1.29E-04 | 959  | 0.333333 | 3.213088 | 504064 | POLG     |
| 1176.688 | -4354 | 1.29E-04 | 1097 | 0.333333 | 3.212859 | 501444 | BCAR1    |
| 1416.035 | -4354 | 1.29E-04 | 1073 | 0.333333 | 3.212859 | 504250 | DVL2     |
| 985.2076 | -4354 | 1.29E-04 | 1026 | 0.333333 | 3.212629 | 433648 | KLK3     |
| 1202.966 | -4354 | 1.29E-04 | 1217 | 0.333333 | 3.2124   | 471948 | PSMB2    |
| 1329.234 | -4354 | 1.29E-04 | 1019 | 0.333333 | 3.2124   | 521892 | DET1     |
| 1191.363 | -4354 | 1.29E-04 | 995  | 0.333333 | 3.2124   | 505404 | MTMR1    |
| 1016.267 | -4354 | 1.29E-04 | 973  | 0.333333 | 3.21217  | 488770 | VAMP1    |
| 1473.17  | -4354 | 1.29E-04 | 1039 | 0.333333 | 3.21194  | 529248 | SEC22A   |
| 1355.955 | -4354 | 1.28E-04 | 1127 | 0.333333 | 3.211711 | 527008 | TOP2A    |
| 945.98   | -4354 | 1.28E-04 | 1006 | 0.333333 | 3.211481 | 400412 | CYP3A43  |
| 2126.502 | -4354 | 1.28E-04 | 972  | 0.333333 | 3.211481 | 572220 | PCGF6    |
| 933.4382 | -4354 | 1.28E-04 | 969  | 0.333333 | 3.211481 | 433428 | IL9R     |
| 1048.797 | -4354 | 1.28E-04 | 952  | 0.333333 | 3.211481 | 488636 | SIPA1L3  |
| 1187.545 | -4354 | 1.28E-04 | 1049 | 0.333333 | 3.211251 | 507496 | RGMB     |
| 1326.486 | -4354 | 1.28E-04 | 1037 | 0.333333 | 3.211251 | 512956 | IPMK     |
| 1139.652 | -4354 | 1.28E-04 | 1027 | 0.333333 | 3.211251 | 463160 | STAG2    |
| 1210.581 | -4354 | 1.28E-04 | 989  | 0.333333 | 3.211251 | 471940 | CALML6   |
| 1017.782 | -4354 | 1.28E-04 | 965  | 0.333333 | 3.211022 | 444574 | IL17RC   |
| 1137.313 | -4354 | 1.28E-04 | 1229 | 0.333333 | 3.210792 | 455818 | PSMD11   |
| 1198.442 | -4354 | 1.28E-04 | 1036 | 0.333333 | 3.210792 | 488606 | IFIH1    |
| 1182.893 | -4354 | 1.28E-04 | 1015 | 0.333333 | 3.210792 | 488578 | ABCB5    |
| 2243.948 | -4354 | 1.28E-04 | 967  | 0.333333 | 3.210792 | 540034 | MT-ATP6  |

|          |       |          |      |          |          |        |          |
|----------|-------|----------|------|----------|----------|--------|----------|
| 960.4188 | -4354 | 1.28E-04 | 1118 | 0.333333 | 3.210563 | 417096 | OPRM1    |
| 1312.151 | -4354 | 1.28E-04 | 995  | 0.333333 | 3.210563 | 510682 | HMMR     |
| 1368.017 | -4354 | 1.28E-04 | 980  | 0.333333 | 3.210563 | 494730 | THEM5    |
| 1237.996 | -4354 | 1.28E-04 | 943  | 0.333333 | 3.210563 | 485860 | GLYCTK   |
| 1006.936 | -4354 | 1.28E-04 | 938  | 0.333333 | 3.210333 | 430844 | SPOPL    |
| 889.0138 | -4354 | 1.28E-04 | 1013 | 0.333333 | 3.210103 | 415866 | CNGB1    |
| 1128.494 | -4354 | 1.28E-04 | 1008 | 0.333333 | 3.210103 | 490346 | CACNA2D4 |
| 1130.261 | -4354 | 1.28E-04 | 1043 | 0.333333 | 3.209874 | 477286 | ARID1A   |
| 967.7624 | -4354 | 1.28E-04 | 1030 | 0.333333 | 3.209874 | 439718 | CFHR3    |
| 1394.824 | -4354 | 1.28E-04 | 1040 | 0.333333 | 3.209644 | 527294 | SCFD2    |
| 1555.122 | -4354 | 1.28E-04 | 1025 | 0.333333 | 3.209644 | 622468 | CHMP4B   |
| 1100.07  | -4354 | 1.28E-04 | 979  | 0.333333 | 3.209644 | 469652 | LGI4     |
| 893.5096 | -4354 | 1.28E-04 | 944  | 0.333333 | 3.209644 | 398262 | P2RX2    |
| 1204.707 | -4354 | 1.28E-04 | 940  | 0.333333 | 3.209644 | 471196 | ELOVL3   |
| 1332.306 | -4354 | 1.28E-04 | 1007 | 0.333333 | 3.209414 | 496684 | UNC5A    |
| 1226.813 | -4354 | 1.28E-04 | 1090 | 0.333333 | 3.209185 | 484218 | USP7     |
| 890.6911 | -4354 | 1.28E-04 | 997  | 0.333333 | 3.209185 | 428170 | BMP1     |
| 1140.95  | -4354 | 1.28E-04 | 932  | 0.333333 | 3.209185 | 485304 | FOXO6    |
| 1221.372 | -4354 | 1.28E-04 | 1020 | 0.333333 | 3.208726 | 464970 | SRSF3    |
| 1207.72  | -4354 | 1.28E-04 | 966  | 0.333333 | 3.208726 | 484350 | AP4E1    |
| 1204.439 | -4354 | 1.28E-04 | 966  | 0.333333 | 3.208496 | 458870 | LDHAL6A  |
| 1176.669 | -4354 | 1.28E-04 | 963  | 0.333333 | 3.208496 | 467716 | GABPA    |
| 1086.876 | -4354 | 1.28E-04 | 950  | 0.333333 | 3.208496 | 457164 | SLC4A5   |
| 1005.082 | -4354 | 1.28E-04 | 927  | 0.333333 | 3.208496 | 445742 | PNLIPRP3 |
| 1015.659 | -4354 | 1.28E-04 | 1023 | 0.333333 | 3.208266 | 418100 | SLCO1A2  |
| 919.0618 | -4354 | 1.28E-04 | 959  | 0.333333 | 3.208266 | 424700 | UBE2Q1   |
| 1108.837 | -4354 | 1.28E-04 | 1056 | 0.333333 | 3.208037 | 473440 | STAM2    |
| 1784.771 | -4354 | 1.28E-04 | 1012 | 0.333333 | 3.208037 | 576014 | PCGF3    |
| 1166.192 | -4354 | 1.28E-04 | 966  | 0.333333 | 3.208037 | 434974 | SP7      |
| 1107.416 | -4354 | 1.28E-04 | 951  | 0.333333 | 3.207807 | 475816 | DFFA     |
| 1191.948 | -4354 | 1.28E-04 | 1012 | 0.333333 | 3.207577 | 459584 | BRD7     |
| 1254.481 | -4354 | 1.28E-04 | 1003 | 0.333333 | 3.207577 | 504022 | INVS     |
| 1216.159 | -4354 | 1.28E-04 | 957  | 0.333333 | 3.207577 | 445788 | ESX1     |
| 1190.897 | -4354 | 1.28E-04 | 942  | 0.333333 | 3.207577 | 466878 | BTLA     |
| 947.0242 | -4354 | 1.28E-04 | 932  | 0.333333 | 3.207577 | 437922 | WTIP     |
| 1313.342 | -4354 | 1.28E-04 | 928  | 0.333333 | 3.207577 | 477720 | PRMT9    |
| 1310.22  | -4354 | 1.28E-04 | 1011 | 0.333333 | 3.207348 | 500224 | FNIP1    |
| 1188.74  | -4354 | 1.28E-04 | 1000 | 0.333333 | 3.207348 | 476974 | SMAD5    |
| 1083.013 | -4354 | 1.28E-04 | 1071 | 0.333333 | 3.207118 | 436230 | UBE2K    |
| 1089.77  | -4354 | 1.28E-04 | 953  | 0.333333 | 3.207118 | 449384 | HES5     |
| 1167.762 | -4354 | 1.28E-04 | 1037 | 0.333333 | 3.206659 | 471122 | COX15    |

|          |       |          |      |          |          |        |          |
|----------|-------|----------|------|----------|----------|--------|----------|
| 1127.515 | -4354 | 1.28E-04 | 962  | 0.333333 | 3.206659 | 453552 | AKT1S1   |
| 958.6775 | -4354 | 1.28E-04 | 1028 | 0.333333 | 3.206429 | 416128 | GBP5     |
| 999.7107 | -4354 | 1.28E-04 | 977  | 0.333333 | 3.206429 | 445314 | BVES     |
| 1046.999 | -4354 | 1.28E-04 | 941  | 0.333333 | 3.206429 | 445638 | JMJD6    |
| 1414.366 | -4354 | 1.28E-04 | 1089 | 0.333333 | 3.2062   | 464486 | COX7B    |
| 1997.858 | -4354 | 1.28E-04 | 991  | 0.333333 | 3.2062   | 806176 | PPP1R3A  |
| 929.1762 | -4354 | 1.28E-04 | 955  | 0.333333 | 3.20597  | 439156 | NBR1     |
| 1449.136 | -4354 | 1.28E-04 | 1132 | 0.333333 | 3.205741 | 485784 | CUL5     |
| 858.2505 | -4354 | 1.28E-04 | 1056 | 0.333333 | 3.205741 | 399060 | HTR4     |
| 1102.056 | -4354 | 1.28E-04 | 1049 | 0.333333 | 3.205741 | 454424 | ITGA11   |
| 1271.379 | -4354 | 1.28E-04 | 1084 | 0.333333 | 3.205511 | 476966 | CUL4A    |
| 1206.84  | -4354 | 1.28E-04 | 1010 | 0.333333 | 3.205511 | 482170 | HERC4    |
| 1041.548 | -4354 | 1.28E-04 | 1002 | 0.333333 | 3.205511 | 436834 | BOC      |
| 1033.138 | -4354 | 1.28E-04 | 963  | 0.333333 | 3.205511 | 425670 | GP5      |
| 1206.626 | -4354 | 1.28E-04 | 1002 | 0.333333 | 3.205281 | 467462 | KCNK9    |
| 1046.896 | -4354 | 1.28E-04 | 919  | 0.333333 | 3.205281 | 468470 | UBE2QL1  |
| 1192.407 | -4354 | 1.28E-04 | 1244 | 0.333333 | 3.205052 | 436824 | PSMC2    |
| 1111.661 | -4354 | 1.28E-04 | 1069 | 0.333333 | 3.205052 | 442410 | MAP2K7   |
| 1429.903 | -4354 | 1.28E-04 | 1029 | 0.333333 | 3.205052 | 442314 | ATP5PD   |
| 1054.34  | -4354 | 1.28E-04 | 907  | 0.333333 | 3.205052 | 448666 | CASTOR2  |
| 1203.835 | -4354 | 1.28E-04 | 1061 | 0.333333 | 3.204822 | 486814 | NSD2     |
| 1158.317 | -4354 | 1.28E-04 | 1043 | 0.333333 | 3.204822 | 469094 | EIF2AK2  |
| 1722.751 | -4354 | 1.28E-04 | 974  | 0.333333 | 3.204822 | 585516 | CHMP5    |
| 732.5507 | -4354 | 1.28E-04 | 932  | 0.333333 | 3.204822 | 388582 | LILRA5   |
| 1281.631 | -4354 | 1.28E-04 | 1065 | 0.333333 | 3.204363 | 478792 | DDX58    |
| 1498.184 | -4354 | 1.28E-04 | 918  | 0.333333 | 3.204363 | 527584 | CLDN23   |
| 998.8242 | -4354 | 1.28E-04 | 907  | 0.333333 | 3.204133 | 423476 | TKTL2    |
| 1260.88  | -4354 | 1.28E-04 | 1236 | 0.333333 | 3.203904 | 444522 | PSMB1    |
| 1104.842 | -4354 | 1.28E-04 | 1043 | 0.333333 | 3.203904 | 451582 | ATG5     |
| 1210.171 | -4354 | 1.28E-04 | 945  | 0.333333 | 3.203904 | 484606 | MARVELD2 |
| 1048.077 | -4354 | 1.28E-04 | 1036 | 0.333333 | 3.203674 | 424658 | PGLS     |
| 1192.864 | -4354 | 1.28E-04 | 1007 | 0.333333 | 3.203674 | 467750 | ABLIM2   |
| 1069.549 | -4354 | 1.28E-04 | 931  | 0.333333 | 3.203674 | 463618 | MACC1    |
| 1429.671 | -4354 | 1.28E-04 | 927  | 0.333333 | 3.203674 | 498860 | DTX3     |
| 1248.843 | -4354 | 1.28E-04 | 960  | 0.333333 | 3.203444 | 448818 | TBX20    |
| 1229.053 | -4354 | 1.28E-04 | 1193 | 0.333333 | 3.203215 | 424840 | PSMA2    |
| 977.5011 | -4354 | 1.28E-04 | 1035 | 0.333333 | 3.203215 | 425846 | APOC2    |
| 891.9865 | -4354 | 1.28E-04 | 962  | 0.333333 | 3.203215 | 410988 | APH1A    |
| 1058.405 | -4354 | 1.28E-04 | 951  | 0.333333 | 3.203215 | 411834 | WNT9B    |
| 1231.023 | -4354 | 1.28E-04 | 963  | 0.333333 | 3.202755 | 476326 | MSH3     |
| 930.4489 | -4354 | 1.28E-04 | 1036 | 0.333333 | 3.202526 | 401330 | TPI1     |

|          |       |          |      |          |          |        |          |
|----------|-------|----------|------|----------|----------|--------|----------|
| 1290.924 | -4354 | 1.28E-04 | 956  | 0.333333 | 3.202526 | 494220 | TAF15    |
| 1487.519 | -4354 | 1.28E-04 | 1076 | 0.333333 | 3.202067 | 457304 | COX7C    |
| 1039.949 | -4354 | 1.28E-04 | 1034 | 0.333333 | 3.202067 | 422348 | HSPD1    |
| 1114.512 | -4354 | 1.28E-04 | 976  | 0.333333 | 3.202067 | 458162 | NGEF     |
| 829.9231 | -4354 | 1.28E-04 | 1002 | 0.333333 | 3.201837 | 369116 | GNAT1    |
| 928.6195 | -4354 | 1.28E-04 | 967  | 0.333333 | 3.201837 | 425194 | SP100    |
| 937.0527 | -4354 | 1.28E-04 | 979  | 0.333333 | 3.201607 | 430102 | SETD7    |
| 1600.694 | -4354 | 1.28E-04 | 1119 | 0.333333 | 3.201378 | 472596 | UQCR11   |
| 1455.496 | -4354 | 1.28E-04 | 950  | 0.333333 | 3.201378 | 436956 | COX6A1   |
| 988.2544 | -4354 | 1.28E-04 | 932  | 0.333333 | 3.201378 | 454546 | SLC45A3  |
| 1018.025 | -4354 | 1.28E-04 | 919  | 0.333333 | 3.201378 | 448160 | SPATA2   |
| 1065.693 | -4354 | 1.28E-04 | 1013 | 0.333333 | 3.200918 | 448194 | EIF4B    |
| 1120.112 | -4354 | 1.28E-04 | 937  | 0.333333 | 3.200918 | 458190 | UBE2D4   |
| 1045.043 | -4354 | 1.28E-04 | 1046 | 0.333333 | 3.200689 | 398810 | UBE2N    |
| 1044     | -4354 | 1.28E-04 | 929  | 0.333333 | 3.200689 | 438518 | MCOLN2   |
| 880.2398 | -4354 | 1.28E-04 | 891  | 0.333333 | 3.200689 | 400628 | GPX8     |
| 1040.548 | -4354 | 1.28E-04 | 1004 | 0.333333 | 3.200459 | 413992 | SAE1     |
| 1430.131 | -4354 | 1.28E-04 | 972  | 0.333333 | 3.200459 | 503248 | CCL28    |
| 1122.893 | -4354 | 1.28E-04 | 915  | 0.333333 | 3.20023  | 448288 | ENPP5    |
| 960.4448 | -4354 | 1.28E-04 | 930  | 0.333333 | 3.2      | 386730 | MTMR7    |
| 958.2208 | -4354 | 1.28E-04 | 947  | 0.333333 | 3.19977  | 404056 | ATG3     |
| 846.9064 | -4354 | 1.28E-04 | 891  | 0.333333 | 3.19977  | 388074 | DGKK     |
| 1217.682 | -4354 | 1.28E-04 | 1029 | 0.333333 | 3.199541 | 424500 | CDC26    |
| 983.64   | -4354 | 1.28E-04 | 952  | 0.333333 | 3.199541 | 413094 | AP3D1    |
| 1309.612 | -4354 | 1.28E-04 | 1004 | 0.333333 | 3.199311 | 459440 | AGGF1    |
| 750.8377 | -4354 | 1.28E-04 | 944  | 0.333333 | 3.199311 | 372418 | HLA-DQB1 |
| 789.4607 | -4354 | 1.28E-04 | 892  | 0.333333 | 3.199311 | 402004 | RAB7B    |
| 1256.906 | -4354 | 1.28E-04 | 949  | 0.333333 | 3.199082 | 449398 | RNF31    |
| 1390.445 | -4354 | 1.28E-04 | 1045 | 0.333333 | 3.198852 | 467244 | ORC5     |
| 1446.58  | -4354 | 1.28E-04 | 1035 | 0.333333 | 3.198852 | 454468 | NDUFC1   |
| 1456.395 | -4354 | 1.28E-04 | 886  | 0.333333 | 3.198852 | 483884 | ATXN1L   |
| 1241.073 | -4354 | 1.28E-04 | 939  | 0.333333 | 3.198393 | 372598 | SPAM1    |
| 1108.796 | -4354 | 1.28E-04 | 939  | 0.333333 | 3.198393 | 442904 | ATG2B    |
| 884.4316 | -4354 | 1.28E-04 | 995  | 0.333333 | 3.198163 | 385376 | DDX3X    |
| 1172.286 | -4354 | 1.28E-04 | 936  | 0.333333 | 3.197933 | 429184 | TBCE     |
| 968.9985 | -4354 | 1.27E-04 | 891  | 0.333333 | 3.197704 | 419284 | CA5B     |
| 1156.202 | -4354 | 1.27E-04 | 998  | 0.333333 | 3.197474 | 427020 | MSH6     |
| 1098.977 | -4354 | 1.27E-04 | 1030 | 0.333333 | 3.197245 | 411884 | UBE2D2   |
| 1202.778 | -4354 | 1.27E-04 | 1029 | 0.333333 | 3.197245 | 455298 | CCNT2    |
| 910.707  | -4354 | 1.27E-04 | 925  | 0.333333 | 3.197245 | 369418 | KCNH6    |
| 1411.495 | -4354 | 1.27E-04 | 1055 | 0.333333 | 3.197015 | 441208 | NDUFS7   |



|          |       |          |      |          |          |        |          |
|----------|-------|----------|------|----------|----------|--------|----------|
| 1009.632 | -4354 | 1.27E-04 | 970  | 0.333333 | 3.197015 | 437202 | PPP2R2C  |
| 937.8205 | -4354 | 1.27E-04 | 974  | 0.333333 | 3.196785 | 426936 | MAGI3    |
| 1047.842 | -4354 | 1.27E-04 | 954  | 0.333333 | 3.196785 | 403104 | PPA2     |
| 1044.531 | -4354 | 1.27E-04 | 953  | 0.333333 | 3.196785 | 388124 | SDHC     |
| 1021.82  | -4354 | 1.27E-04 | 954  | 0.333333 | 3.196556 | 430478 | SLC44A5  |
| 1143.67  | -4354 | 1.27E-04 | 1009 | 0.333333 | 3.196326 | 445828 | BUB1     |
| 1087.942 | -4354 | 1.27E-04 | 967  | 0.333333 | 3.196096 | 446050 | IFNLR1   |
| 773.6425 | -4354 | 1.27E-04 | 897  | 0.333333 | 3.195867 | 369822 | CARD14   |
| 937.7475 | -4354 | 1.27E-04 | 896  | 0.333333 | 3.195867 | 408296 | AIFM2    |
| 793.7529 | -4354 | 1.27E-04 | 953  | 0.333333 | 3.195637 | 358152 | FGF19    |
| 1071.815 | -4354 | 1.27E-04 | 916  | 0.333333 | 3.195637 | 415840 | MAVS     |
| 757.6923 | -4354 | 1.27E-04 | 884  | 0.333333 | 3.195408 | 364722 | KIR2DL4  |
| 1123.716 | -4354 | 1.27E-04 | 1122 | 0.333333 | 3.195178 | 387958 | PSMB4    |
| 614.6468 | -4354 | 1.27E-04 | 876  | 0.333333 | 3.194948 | 332680 | PCYT1B   |
| 1589.452 | -4354 | 1.27E-04 | 988  | 0.333333 | 3.194719 | 442766 | ATP5F1E  |
| 828.0153 | -4354 | 1.27E-04 | 906  | 0.333333 | 3.194719 | 353192 | SLC34A1  |
| 935.7537 | -4354 | 1.27E-04 | 873  | 0.333333 | 3.194719 | 373730 | LRRC4B   |
| 1208.515 | -4354 | 1.27E-04 | 891  | 0.333333 | 3.194489 | 431982 | NUDT16L1 |
| 818.2985 | -4354 | 1.27E-04 | 888  | 0.333333 | 3.194489 | 380614 | ANGPTL1  |
| 1080.565 | -4354 | 1.27E-04 | 1107 | 0.333333 | 3.194259 | 404200 | BUB3     |
| 1123.718 | -4354 | 1.27E-04 | 1002 | 0.333333 | 3.194259 | 411294 | ADCY5    |
| 1130.833 | -4354 | 1.27E-04 | 880  | 0.333333 | 3.194259 | 425370 | ANAPC13  |
| 1022.109 | -4354 | 1.27E-04 | 936  | 0.333333 | 3.19403  | 421826 | SETD2    |
| 1208.439 | -4354 | 1.27E-04 | 873  | 0.333333 | 3.1938   | 425050 | CLDN20   |
| 789.562  | -4354 | 1.27E-04 | 870  | 0.333333 | 3.1938   | 366470 | BPNT2    |
| 775.3399 | -4354 | 1.27E-04 | 893  | 0.333333 | 3.193571 | 356558 | COL6A6   |
| 1138.101 | -4354 | 1.27E-04 | 892  | 0.333333 | 3.193571 | 414134 | MZF1     |
| 961.4784 | -4354 | 1.27E-04 | 881  | 0.333333 | 3.193571 | 393194 | COX7B2   |
| 1040.101 | -4354 | 1.27E-04 | 1052 | 0.333333 | 3.193341 | 408116 | ANAPC5   |
| 939.3189 | -4354 | 1.27E-04 | 933  | 0.333333 | 3.193341 | 404514 | TNFRSF19 |
| 1545.426 | -4354 | 1.27E-04 | 1071 | 0.333333 | 3.193111 | 462534 | NDUFB2   |
| 865.2316 | -4354 | 1.27E-04 | 940  | 0.333333 | 3.193111 | 368892 | NBN      |
| 971.5713 | -4354 | 1.27E-04 | 977  | 0.333333 | 3.192882 | 404538 | YY1      |
| 786.7012 | -4354 | 1.27E-04 | 919  | 0.333333 | 3.192882 | 348838 | HNF1A    |
| 1232.37  | -4354 | 1.27E-04 | 931  | 0.333333 | 3.192652 | 403514 | UBE2U    |
| 562.4795 | -4354 | 1.27E-04 | 907  | 0.333333 | 3.192652 | 308548 | NRXN1    |
| 1134.985 | -4354 | 1.27E-04 | 947  | 0.333333 | 3.192423 | 420668 | SLC2A12  |
| 1172.772 | -4354 | 1.27E-04 | 894  | 0.333333 | 3.192193 | 430002 | NUMBL    |
| 985.718  | -4354 | 1.27E-04 | 925  | 0.333333 | 3.191504 | 399676 | ATG4B    |
| 1375.419 | -4354 | 1.27E-04 | 922  | 0.333333 | 3.191504 | 532410 | PLA2G12B |
| 1036.256 | -4354 | 1.27E-04 | 946  | 0.333333 | 3.191274 | 436794 | FBXW8    |

|          |       |          |      |          |          |        |          |
|----------|-------|----------|------|----------|----------|--------|----------|
| 867.3064 | -4354 | 1.27E-04 | 921  | 0.333333 | 3.191274 | 364374 | TAOK2    |
| 948.0511 | -4354 | 1.27E-04 | 875  | 0.333333 | 3.191274 | 357312 | GSTA1    |
| 632.5456 | -4354 | 1.27E-04 | 860  | 0.333333 | 3.190815 | 321026 | MUC5AC   |
| 983.0871 | -4354 | 1.27E-04 | 1148 | 0.333333 | 3.190356 | 362294 | PSMD4    |
| 667.1656 | -4354 | 1.27E-04 | 860  | 0.333333 | 3.190356 | 348856 | EPB41L4B |
| 1375.219 | -4354 | 1.27E-04 | 1051 | 0.333333 | 3.190126 | 408686 | COX5B    |
| 1086.378 | -4354 | 1.27E-04 | 959  | 0.333333 | 3.190126 | 407900 | MIB1     |
| 787.5181 | -4354 | 1.27E-04 | 871  | 0.333333 | 3.190126 | 330390 | TP53AIP1 |
| 1221.231 | -4354 | 1.27E-04 | 925  | 0.333333 | 3.188978 | 430362 | MOSMO    |
| 972.0709 | -4354 | 1.27E-04 | 920  | 0.333333 | 3.188978 | 397768 | UBA6     |
| 723.6106 | -4354 | 1.27E-04 | 918  | 0.333333 | 3.188978 | 321148 | GH2      |
| 984.1251 | -4354 | 1.27E-04 | 904  | 0.333333 | 3.188978 | 400876 | TPCN2    |
| 1349.82  | -4354 | 1.27E-04 | 951  | 0.333333 | 3.188749 | 390198 | UQCR10   |
| 889.7951 | -4354 | 1.27E-04 | 870  | 0.333333 | 3.188749 | 371442 | TIGIT    |
| 625.145  | -4354 | 1.27E-04 | 869  | 0.333333 | 3.188749 | 304882 | TNXB     |
| 714.2942 | -4354 | 1.27E-04 | 851  | 0.333333 | 3.188749 | 304460 | GPX5     |
| 901.2814 | -4354 | 1.27E-04 | 931  | 0.333333 | 3.188289 | 363522 | GNG8     |
| 661.4994 | -4354 | 1.27E-04 | 846  | 0.333333 | 3.18806  | 323614 | MUC5B    |
| 1473.913 | -4354 | 1.27E-04 | 994  | 0.333333 | 3.187371 | 423320 | NDUFB1   |
| 1010.058 | -4354 | 1.27E-04 | 903  | 0.333333 | 3.186682 | 376924 | TFAM     |
| 618.4755 | -4354 | 1.27E-04 | 885  | 0.333333 | 3.186682 | 305522 | GRIN2C   |
| 990.2275 | -4354 | 1.27E-04 | 850  | 0.333333 | 3.186682 | 391736 | DHODH    |
| 1147.238 | -4354 | 1.27E-04 | 985  | 0.333333 | 3.186452 | 427900 | CYP51A1  |
| 913.9214 | -4354 | 1.27E-04 | 905  | 0.333333 | 3.186452 | 363998 | ACP1     |
| 1103.844 | -4354 | 1.27E-04 | 890  | 0.333333 | 3.186223 | 405774 | ERCC8    |
| 928.7853 | -4354 | 1.27E-04 | 878  | 0.333333 | 3.186223 | 391192 | STMN1    |
| 588.0449 | -4354 | 1.27E-04 | 839  | 0.333333 | 3.185993 | 299158 | KLK15    |
| 859.9999 | -4354 | 1.27E-04 | 996  | 0.333333 | 3.185763 | 367432 | PRKDC    |
| 918.0208 | -4354 | 1.27E-04 | 917  | 0.333333 | 3.185763 | 379160 | VAMP4    |
| 890.4791 | -4354 | 1.27E-04 | 855  | 0.333333 | 3.185763 | 388366 | ZBTB24   |
| 1120.997 | -4354 | 1.27E-04 | 848  | 0.333333 | 3.185763 | 393364 | EFCAB7   |
| 960.8654 | -4354 | 1.27E-04 | 855  | 0.333333 | 3.185304 | 355956 | IFNK     |
| 872.1681 | -4354 | 1.27E-04 | 855  | 0.333333 | 3.184845 | 363462 | OTUD5    |
| 764.12   | -4354 | 1.27E-04 | 932  | 0.333333 | 3.184615 | 326712 | GRIN1    |
| 1101.316 | -4354 | 1.27E-04 | 862  | 0.333333 | 3.184615 | 375852 | WDR24    |
| 766.1851 | -4354 | 1.27E-04 | 865  | 0.333333 | 3.184386 | 352702 | WIPI2    |
| 743.4929 | -4354 | 1.27E-04 | 857  | 0.333333 | 3.184156 | 336740 | BMP8B    |
| 1101.824 | -4354 | 1.27E-04 | 938  | 0.333333 | 3.183927 | 395940 | RPS6     |
| 1041.536 | -4354 | 1.27E-04 | 867  | 0.333333 | 3.183927 | 375968 | ATP5MC2  |
| 801.5083 | -4354 | 1.27E-04 | 864  | 0.333333 | 3.183927 | 362658 | PGM2L1   |
| 707.5551 | -4354 | 1.27E-04 | 819  | 0.333333 | 3.183927 | 334690 | TMEM37   |

|          |       |          |     |          |          |        |          |
|----------|-------|----------|-----|----------|----------|--------|----------|
| 599.9927 | -4354 | 1.27E-04 | 833 | 0.333333 | 3.183697 | 305676 | NOX1     |
| 950.5305 | -4354 | 1.26E-04 | 941 | 0.333333 | 3.183238 | 379696 | SMC1A    |
| 933.9309 | -4354 | 1.26E-04 | 997 | 0.333333 | 3.182549 | 339974 | CDC23    |
| 689.031  | -4354 | 1.26E-04 | 878 | 0.333333 | 3.182549 | 308514 | WNT6     |
| 772.3    | -4354 | 1.26E-04 | 865 | 0.333333 | 3.18186  | 335756 | TRIM10   |
| 927.0373 | -4354 | 1.26E-04 | 834 | 0.333333 | 3.18186  | 353202 | EBAG9    |
| 950.9662 | -4354 | 1.26E-04 | 889 | 0.333333 | 3.18163  | 372654 | PACSIN1  |
| 768.6742 | -4354 | 1.26E-04 | 828 | 0.333333 | 3.181401 | 351456 | SLC24A1  |
| 765.549  | -4354 | 1.26E-04 | 905 | 0.333333 | 3.180941 | 327330 | FFAR1    |
| 894.1215 | -4354 | 1.26E-04 | 857 | 0.333333 | 3.180712 | 372732 | DIRAS1   |
| 744.5166 | -4354 | 1.26E-04 | 856 | 0.333333 | 3.180712 | 337532 | CREG2    |
| 831.3914 | -4354 | 1.26E-04 | 834 | 0.333333 | 3.180482 | 346180 | SIRT3    |
| 932.3768 | -4354 | 1.26E-04 | 912 | 0.333333 | 3.180253 | 361740 | CDC25C   |
| 952.4302 | -4354 | 1.26E-04 | 869 | 0.333333 | 3.180253 | 338778 | MPP4     |
| 778.8513 | -4354 | 1.26E-04 | 821 | 0.333333 | 3.180253 | 338990 | KDM1B    |
| 610.8322 | -4354 | 1.26E-04 | 853 | 0.333333 | 3.179793 | 293912 | HAVCR2   |
| 675.7611 | -4354 | 1.26E-04 | 820 | 0.333333 | 3.179564 | 312474 | CRB2     |
| 936.7113 | -4354 | 1.26E-04 | 836 | 0.333333 | 3.178875 | 339308 | PLCD3    |
| 860.4159 | -4354 | 1.26E-04 | 827 | 0.333333 | 3.178875 | 348298 | NPRL2    |
| 652.9943 | -4354 | 1.26E-04 | 821 | 0.333333 | 3.178875 | 300850 | MYH14    |
| 866.5622 | -4354 | 1.26E-04 | 928 | 0.333333 | 3.178645 | 329502 | EIF2S1   |
| 467.6991 | -4354 | 1.26E-04 | 820 | 0.333333 | 3.178645 | 243542 | PNLIPRP1 |
| 871.4438 | -4354 | 1.26E-04 | 951 | 0.333333 | 3.178416 | 362568 | SIN3A    |
| 830.9739 | -4354 | 1.26E-04 | 844 | 0.333333 | 3.178416 | 328138 | KDM6A    |
| 708.8629 | -4354 | 1.26E-04 | 816 | 0.333333 | 3.178416 | 323694 | NPNT     |
| 577.1634 | -4354 | 1.26E-04 | 868 | 0.333333 | 3.178186 | 269380 | MASP2    |
| 984.6848 | -4354 | 1.26E-04 | 909 | 0.333333 | 3.177727 | 360086 | CACYBP   |
| 712.1077 | -4354 | 1.26E-04 | 831 | 0.333333 | 3.177727 | 341272 | ARSG     |
| 738.1586 | -4354 | 1.26E-04 | 830 | 0.333333 | 3.177038 | 328672 | GGA1     |
| 920.2588 | -4354 | 1.26E-04 | 807 | 0.333333 | 3.176808 | 363988 | SUPT20H  |
| 954.6037 | -4354 | 1.26E-04 | 862 | 0.333333 | 3.176579 | 358314 | SUFU     |
| 655.7724 | -4354 | 1.26E-04 | 931 | 0.333333 | 3.176119 | 283436 | CD68     |
| 1365.503 | -4354 | 1.26E-04 | 865 | 0.333333 | 3.176119 | 414092 | PCGF5    |
| 763.0488 | -4354 | 1.26E-04 | 833 | 0.333333 | 3.17566  | 321126 | XAF1     |
| 666.8146 | -4354 | 1.26E-04 | 842 | 0.333333 | 3.175431 | 286368 | FGF22    |
| 847.8315 | -4354 | 1.26E-04 | 823 | 0.333333 | 3.175431 | 338458 | IL17RE   |
| 733.3242 | -4354 | 1.26E-04 | 788 | 0.333333 | 3.175431 | 308856 | DAGLB    |
| 771.7026 | -4354 | 1.26E-04 | 796 | 0.333333 | 3.174742 | 326216 | ZFYVE1   |
| 997.6363 | -4354 | 1.26E-04 | 936 | 0.333333 | 3.174512 | 362706 | MRE11    |
| 634.6539 | -4354 | 1.26E-04 | 811 | 0.333333 | 3.174282 | 305218 | RGMA     |
| 874.3209 | -4354 | 1.26E-04 | 881 | 0.333333 | 3.173823 | 320442 | ORC4     |

|          |       |          |      |          |          |        |          |
|----------|-------|----------|------|----------|----------|--------|----------|
| 1632.169 | -4354 | 1.26E-04 | 792  | 0.333333 | 3.173364 | 808100 | PLB1     |
| 1147.672 | -4354 | 1.26E-04 | 811  | 0.333333 | 3.173134 | 351012 | IQGAP3   |
| 892.8463 | -4354 | 1.26E-04 | 806  | 0.333333 | 3.173134 | 334044 | PIDD1    |
| 722.9531 | -4354 | 1.26E-04 | 780  | 0.333333 | 3.172905 | 325042 | CR1L     |
| 1000.767 | -4354 | 1.26E-04 | 1020 | 0.333333 | 3.172675 | 348728 | HSPA8    |
| 737.4955 | -4354 | 1.26E-04 | 831  | 0.333333 | 3.172675 | 321490 | APLN     |
| 879.5773 | -4354 | 1.26E-04 | 829  | 0.333333 | 3.171986 | 345948 | AP1S3    |
| 618.6818 | -4354 | 1.26E-04 | 789  | 0.333333 | 3.171527 | 272438 | CACNA1I  |
| 959.1701 | -4354 | 1.26E-04 | 818  | 0.333333 | 3.170838 | 343188 | IDNK     |
| 879.5141 | -4354 | 1.26E-04 | 775  | 0.333333 | 3.170379 | 336132 | RAB39B   |
| 1322.776 | -4354 | 1.26E-04 | 948  | 0.333333 | 3.170149 | 354336 | NDUFA5   |
| 1145.398 | -4354 | 1.26E-04 | 901  | 0.333333 | 3.170149 | 321342 | ATP5MG   |
| 845.5337 | -4354 | 1.26E-04 | 840  | 0.333333 | 3.170149 | 326980 | SIKE1    |
| 697.4737 | -4354 | 1.26E-04 | 820  | 0.333333 | 3.16969  | 298760 | TPR      |
| 871.838  | -4354 | 1.26E-04 | 804  | 0.333333 | 3.16969  | 303636 | EPHA8    |
| 804.4454 | -4354 | 1.26E-04 | 787  | 0.333333 | 3.16969  | 302012 | WNK4     |
| 939.3295 | -4354 | 1.26E-04 | 931  | 0.333333 | 3.16946  | 344342 | PLK4     |
| 692.8546 | -4354 | 1.26E-04 | 837  | 0.333333 | 3.16946  | 276854 | ADH4     |
| 911.6705 | -4354 | 1.25E-04 | 905  | 0.333333 | 3.169001 | 321226 | ELOB     |
| 807.9157 | -4354 | 1.25E-04 | 821  | 0.333333 | 3.169001 | 324922 | RIF1     |
| 716.5353 | -4354 | 1.25E-04 | 782  | 0.333333 | 3.168542 | 308232 | SUMF1    |
| 574.2289 | -4354 | 1.25E-04 | 747  | 0.333333 | 3.168542 | 279198 | APELA    |
| 683.309  | -4354 | 1.25E-04 | 745  | 0.333333 | 3.168542 | 294408 | COX8C    |
| 1107.478 | -4354 | 1.25E-04 | 950  | 0.333333 | 3.168312 | 322184 | NDUFB10  |
| 563.5417 | -4354 | 1.25E-04 | 803  | 0.333333 | 3.168083 | 280104 | EBF3     |
| 925.8804 | -4354 | 1.25E-04 | 906  | 0.333333 | 3.167853 | 340642 | EIF4A1   |
| 634.5669 | -4354 | 1.25E-04 | 804  | 0.333333 | 3.167623 | 282312 | NKD1     |
| 658.5813 | -4354 | 1.25E-04 | 749  | 0.333333 | 3.166935 | 270326 | DEFB132  |
| 567.2831 | -4354 | 1.25E-04 | 785  | 0.333333 | 3.166705 | 270282 | COL6A5   |
| 622.0653 | -4354 | 1.25E-04 | 764  | 0.333333 | 3.166705 | 282566 | RASGRP4  |
| 606.2087 | -4354 | 1.25E-04 | 751  | 0.333333 | 3.166705 | 267948 | PPP1R12C |
| 1161.923 | -4354 | 1.25E-04 | 922  | 0.333333 | 3.166475 | 344962 | NDUFV3   |
| 682.3537 | -4354 | 1.25E-04 | 809  | 0.333333 | 3.166475 | 295228 | PLEKHG5  |
| 673.8103 | -4354 | 1.25E-04 | 799  | 0.333333 | 3.166016 | 301590 | TEAD2    |
| 903.3619 | -4354 | 1.25E-04 | 906  | 0.333333 | 3.165557 | 291532 | COX4I1   |
| 579.9765 | -4354 | 1.25E-04 | 751  | 0.333333 | 3.165557 | 259412 | IGSF5    |
| 851.5032 | -4354 | 1.25E-04 | 784  | 0.333333 | 3.165098 | 301156 | PPIE     |
| 794.5677 | -4354 | 1.25E-04 | 857  | 0.333333 | 3.164868 | 319000 | RAD51    |
| 1215.537 | -4354 | 1.25E-04 | 884  | 0.333333 | 3.16372  | 329964 | NDUFA2   |
| 799.6902 | -4354 | 1.25E-04 | 872  | 0.333333 | 3.163031 | 292940 | SRSF1    |
| 588.786  | -4354 | 1.25E-04 | 758  | 0.333333 | 3.162801 | 271532 | CD276    |

|          |       |          |     |          |          |        |          |
|----------|-------|----------|-----|----------|----------|--------|----------|
| 596.7103 | -4354 | 1.25E-04 | 751 | 0.333333 | 3.162801 | 272120 | ATP6V0D2 |
| 475.5005 | -4354 | 1.25E-04 | 750 | 0.333333 | 3.162801 | 214608 | SLC22A7  |
| 786.9994 | -4354 | 1.25E-04 | 727 | 0.333333 | 3.162801 | 308680 | ACTR3C   |
| 685.7397 | -4354 | 1.25E-04 | 757 | 0.333333 | 3.162572 | 289362 | CGAS     |
| 771.7028 | -4354 | 1.25E-04 | 775 | 0.333333 | 3.162113 | 279896 | IL31RA   |
| 775.9974 | -4354 | 1.25E-04 | 902 | 0.333333 | 3.161883 | 306008 | ITGB6    |
| 624.4838 | -4354 | 1.25E-04 | 755 | 0.333333 | 3.161194 | 272808 | SLC52A3  |
| 550.8678 | -4354 | 1.25E-04 | 746 | 0.333333 | 3.159587 | 252232 | CD99L2   |
| 644.1753 | -4354 | 1.25E-04 | 724 | 0.333333 | 3.159127 | 281732 | PPARGC1B |
| 648.7685 | -4354 | 1.25E-04 | 765 | 0.333333 | 3.158439 | 263532 | WNT9A    |
| 573.0955 | -4354 | 1.25E-04 | 712 | 0.333333 | 3.158209 | 235868 | SMC1B    |
| 700.5877 | -4354 | 1.25E-04 | 792 | 0.333333 | 3.15775  | 272280 | RICTOR   |
| 833.4828 | -4354 | 1.25E-04 | 833 | 0.333333 | 3.157061 | 293366 | GRM7     |
| 635.6519 | -4354 | 1.25E-04 | 745 | 0.333333 | 3.157061 | 260808 | TSPEAR   |
| 647.4869 | -4354 | 1.25E-04 | 887 | 0.333333 | 3.156602 | 259150 | MAP2K3   |
| 617.9786 | -4354 | 1.25E-04 | 732 | 0.333333 | 3.156602 | 240572 | MAPK15   |
| 720.3382 | -4354 | 1.25E-04 | 765 | 0.333333 | 3.156372 | 257318 | RCHY1    |
| 583.4282 | -4354 | 1.25E-04 | 733 | 0.333333 | 3.156372 | 266418 | ACSS1    |
| 1006.446 | -4354 | 1.25E-04 | 857 | 0.333333 | 3.156142 | 287620 | NDUFB7   |
| 552.454  | -4354 | 1.25E-04 | 745 | 0.333333 | 3.155683 | 248314 | IL23R    |
| 583.0845 | -4354 | 1.25E-04 | 758 | 0.333333 | 3.155454 | 249360 | PLAA     |
| 976.3883 | -4354 | 1.25E-04 | 899 | 0.333333 | 3.155224 | 280604 | NDUFA6   |
| 646.9183 | -4354 | 1.25E-04 | 748 | 0.333333 | 3.154535 | 254230 | RAD1     |
| 786.528  | -4354 | 1.25E-04 | 712 | 0.333333 | 3.154535 | 286848 | LIN54    |
| 587.1428 | -4354 | 1.25E-04 | 705 | 0.333333 | 3.154535 | 236474 | S100A7A  |
| 605.8466 | -4354 | 1.24E-04 | 711 | 0.333333 | 3.153846 | 252104 | MIOS     |
| 526.4699 | -4354 | 1.24E-04 | 695 | 0.333333 | 3.153846 | 234424 | NPRL3    |
| 733.2704 | -4354 | 1.24E-04 | 715 | 0.333333 | 3.152928 | 240790 | RSPO2    |
| 435.0255 | -4354 | 1.24E-04 | 692 | 0.333333 | 3.152468 | 232436 | AMOTL1   |
| 710.5949 | -4354 | 1.24E-04 | 744 | 0.333333 | 3.152239 | 269028 | POLK     |
| 621.0636 | -4354 | 1.24E-04 | 738 | 0.333333 | 3.152239 | 242176 | DPYSL5   |
| 479.6097 | -4354 | 1.24E-04 | 717 | 0.333333 | 3.15178  | 229762 | RSPO4    |
| 809.9697 | -4354 | 1.24E-04 | 707 | 0.333333 | 3.15132  | 261422 | CACNG6   |
| 596.4388 | -4354 | 1.24E-04 | 685 | 0.333333 | 3.150631 | 233974 | FAHD1    |
| 606.1855 | -4354 | 1.24E-04 | 751 | 0.333333 | 3.150402 | 261416 | TIRAP    |
| 697.4238 | -4354 | 1.24E-04 | 750 | 0.333333 | 3.150172 | 265974 | CGNL1    |
| 705.9335 | -4354 | 1.24E-04 | 796 | 0.333333 | 3.149943 | 272388 | USP15    |
| 643.0335 | -4354 | 1.24E-04 | 765 | 0.333333 | 3.149943 | 253276 | BIRC5    |
| 601.476  | -4354 | 1.24E-04 | 743 | 0.333333 | 3.149943 | 238868 | RAD50    |
| 562.9989 | -4354 | 1.24E-04 | 745 | 0.333333 | 3.149483 | 231352 | DHFR     |
| 623.314  | -4354 | 1.24E-04 | 723 | 0.333333 | 3.148794 | 248104 | PARD6G   |

|          |       |          |     |          |          |         |           |
|----------|-------|----------|-----|----------|----------|---------|-----------|
| 920.8476 | -4354 | 1.24E-04 | 837 | 0.333333 | 3.148565 | 261606  | NDUFB8    |
| 634.4577 | -4354 | 1.24E-04 | 778 | 0.333333 | 3.148565 | 246596  | BCL3      |
| 797.703  | -4354 | 1.24E-04 | 679 | 0.333333 | 3.148335 | 276440  | MTCP1     |
| 558.5811 | -4354 | 1.24E-04 | 677 | 0.333333 | 3.148335 | 240596  | ATP6V1C2  |
| 515.9741 | -4354 | 1.24E-04 | 676 | 0.333333 | 3.148106 | 218920  | NLGN2     |
| 481.6904 | -4354 | 1.24E-04 | 674 | 0.333333 | 3.148106 | 228040  | EVC2      |
| 713.9476 | -4354 | 1.24E-04 | 728 | 0.333333 | 3.147876 | 258182  | MFSD8     |
| 548.1906 | -4354 | 1.24E-04 | 671 | 0.333333 | 3.147876 | 225212  | DNAJC14   |
| 639.475  | -4354 | 1.24E-04 | 696 | 0.333333 | 3.147187 | 233064  | MARVELD3  |
| 559.1456 | -4354 | 1.24E-04 | 696 | 0.333333 | 3.146728 | 243138  | CRACR2A   |
| 611.8726 | -4354 | 1.24E-04 | 673 | 0.333333 | 3.146498 | 239550  | USP30     |
| 612.1954 | -4354 | 1.24E-04 | 696 | 0.333333 | 3.145809 | 250234  | THEM4     |
| 578.146  | -4354 | 1.24E-04 | 704 | 0.333333 | 3.14535  | 223108  | EIF2AK4   |
| 405.7675 | -4354 | 1.24E-04 | 658 | 0.333333 | 3.145121 | 195018  | LINGO2    |
| 1199.371 | -4354 | 1.24E-04 | 819 | 0.333333 | 3.144661 | 284510  | NDUFS8    |
| 602.6991 | -4354 | 1.24E-04 | 707 | 0.333333 | 3.144432 | 236652  | TAB3      |
| 423.5909 | -4354 | 1.24E-04 | 646 | 0.333333 | 3.144432 | 194364  | MAP1LC3B2 |
| 414.6394 | -4354 | 1.24E-04 | 656 | 0.333333 | 3.143972 | 193266  | EXOC7     |
| 622.3287 | -4354 | 1.24E-04 | 762 | 0.333333 | 3.143743 | 222622  | SAA1      |
| 559.7396 | -4354 | 1.24E-04 | 670 | 0.333333 | 3.142135 | 222080  | ATP1A4    |
| 695.2393 | -4354 | 1.24E-04 | 663 | 0.333333 | 3.141447 | 222198  | CLDN19    |
| 671.3844 | -4354 | 1.24E-04 | 719 | 0.333333 | 3.141217 | 239362  | ATP6V1F   |
| 645.515  | -4354 | 1.24E-04 | 800 | 0.333333 | 3.139839 | 220228  | ACTG1     |
| 20877.4  | -4354 | 1.24E-04 | 621 | 0.333333 | 3.13961  | 4531766 | KRTAP4-1  |
| 493.7201 | -4354 | 1.23E-04 | 646 | 0.333333 | 3.13915  | 205544  | KLHL9     |
| 544.7251 | -4354 | 1.23E-04 | 806 | 0.333333 | 3.137773 | 216278  | ADORA2A   |
| 470.2128 | -4354 | 1.23E-04 | 622 | 0.333333 | 3.136625 | 182766  | SIVA1     |
| 503.2469 | -4354 | 1.23E-04 | 660 | 0.333333 | 3.135936 | 192698  | AP3M1     |
| 363.3079 | -4354 | 1.23E-04 | 628 | 0.333333 | 3.135936 | 172826  | CLPTM1L   |
| 793.7911 | -4354 | 1.23E-04 | 788 | 0.333333 | 3.135706 | 203320  | UQCRB     |
| 468.6169 | -4354 | 1.23E-04 | 626 | 0.333333 | 3.135017 | 186844  | ACBD5     |
| 503.6927 | -4354 | 1.23E-04 | 647 | 0.333333 | 3.134788 | 204792  | GTSE1     |
| 421.2071 | -4354 | 1.23E-04 | 629 | 0.333333 | 3.134788 | 174756  | PTPN5     |
| 345.2055 | -4354 | 1.23E-04 | 604 | 0.333333 | 3.134788 | 170518  | HACD4     |
| 423.8194 | -4354 | 1.23E-04 | 618 | 0.333333 | 3.134558 | 191236  | ADGRG5    |
| 678.8663 | -4354 | 1.23E-04 | 663 | 0.333333 | 3.134328 | 224838  | CIT       |
| 379.8793 | -4354 | 1.23E-04 | 607 | 0.333333 | 3.134328 | 189320  | ALDH1L2   |
| 597.7437 | -4354 | 1.23E-04 | 618 | 0.333333 | 3.133869 | 200500  | GSTO2     |
| 492.2105 | -4354 | 1.23E-04 | 722 | 0.333333 | 3.13318  | 206530  | FZD8      |
| 509.8258 | -4354 | 1.23E-04 | 631 | 0.333333 | 3.13318  | 196998  | SLC38A9   |
| 491.5946 | -4354 | 1.23E-04 | 698 | 0.333333 | 3.132721 | 196378  | IGF2      |

|          |       |          |     |          |          |        |          |
|----------|-------|----------|-----|----------|----------|--------|----------|
| 538.5962 | -4354 | 1.23E-04 | 701 | 0.333333 | 3.132032 | 206378 | LTA4H    |
| 472.4357 | -4354 | 1.23E-04 | 636 | 0.333333 | 3.132032 | 179590 | ATG12    |
| 559.3266 | -4354 | 1.23E-04 | 622 | 0.333333 | 3.132032 | 209768 | ATP6V1E2 |
| 744.5637 | -4354 | 1.23E-04 | 682 | 0.333333 | 3.131803 | 214062 | GLB1     |
| 402.3774 | -4354 | 1.23E-04 | 628 | 0.333333 | 3.131573 | 182262 | SLC16A3  |
| 526.6773 | -4354 | 1.23E-04 | 596 | 0.333333 | 3.130195 | 196644 | SMCR8    |
| 288.5467 | -4354 | 1.23E-04 | 604 | 0.333333 | 3.128358 | 154626 | PLXNA4   |
| 379.539  | -4354 | 1.23E-04 | 605 | 0.333333 | 3.127899 | 158186 | EPHA6    |
| 512.0679 | -4354 | 1.23E-04 | 594 | 0.333333 | 3.127669 | 167506 | SYNGAP1  |
| 616.4472 | -4354 | 1.23E-04 | 650 | 0.333333 | 3.125373 | 197966 | CSNK1A1L |
| 467.2614 | -4354 | 1.22E-04 | 582 | 0.333333 | 3.123766 | 171016 | SIX4     |
| 462.3287 | -4354 | 1.22E-04 | 614 | 0.333333 | 3.123536 | 177150 | FADS1    |
| 340.2681 | -4354 | 1.22E-04 | 574 | 0.333333 | 3.123536 | 136024 | IL36B    |
| 438.8506 | -4354 | 1.22E-04 | 570 | 0.333333 | 3.122847 | 159808 | ANAPC16  |
| 297.087  | -4354 | 1.22E-04 | 575 | 0.333333 | 3.122618 | 141294 | KSR2     |
| 416.5062 | -4354 | 1.22E-04 | 587 | 0.333333 | 3.120781 | 156970 | SOCS4    |
| 482.0289 | -4354 | 1.22E-04 | 788 | 0.333333 | 3.120321 | 162532 | PSMA6    |
| 350.747  | -4354 | 1.22E-04 | 559 | 0.333333 | 3.120321 | 139914 | ESYT3    |
| 450.3062 | -4354 | 1.22E-04 | 566 | 0.333333 | 3.120092 | 170780 | RAD9B    |
| 448.3298 | -4354 | 1.22E-04 | 677 | 0.333333 | 3.119862 | 155188 | ANAPC7   |
| 602.8224 | -4354 | 1.22E-04 | 706 | 0.333333 | 3.119173 | 181342 | ANAPC1   |
| 521.9512 | -4354 | 1.22E-04 | 608 | 0.333333 | 3.118944 | 168456 | CACNA1A  |
| 320.7075 | -4354 | 1.22E-04 | 549 | 0.333333 | 3.118944 | 133072 | COX11    |
| 465.9653 | -4354 | 1.22E-04 | 605 | 0.333333 | 3.118025 | 174138 | TICAM2   |
| 961.4844 | -4354 | 1.22E-04 | 571 | 0.333333 | 3.118025 | 247088 | MEF2B    |
| 350.8267 | -4354 | 1.22E-04 | 548 | 0.333333 | 3.116418 | 148516 | FOXK1    |
| 469.7197 | -4354 | 1.22E-04 | 531 | 0.333333 | 3.116418 | 166870 | HERC3    |
| 420.5922 | -4354 | 1.22E-04 | 549 | 0.333333 | 3.116188 | 160382 | AP4B1    |
| 532.3588 | -4354 | 1.22E-04 | 581 | 0.333333 | 3.114811 | 155902 | CALM2    |
| 482.3708 | -4354 | 1.22E-04 | 621 | 0.333333 | 3.114351 | 139858 | NPY4R    |
| 395.5338 | -4354 | 1.22E-04 | 572 | 0.333333 | 3.114351 | 155628 | ATP1A3   |
| 266.382  | -4354 | 1.22E-04 | 548 | 0.333333 | 3.114122 | 121098 | UBE2J2   |
| 407.4604 | -4354 | 1.22E-04 | 547 | 0.333333 | 3.113892 | 150792 | TRPM7    |
| 345.7988 | -4354 | 1.22E-04 | 539 | 0.333333 | 3.113662 | 137708 | KRIT1    |
| 447.0181 | -4354 | 1.22E-04 | 555 | 0.333333 | 3.113433 | 162376 | LIN9     |
| 428.4811 | -4354 | 1.22E-04 | 645 | 0.333333 | 3.112974 | 128106 | ANAPC11  |
| 343.5894 | -4354 | 1.22E-04 | 519 | 0.333333 | 3.112514 | 134190 | SLC46A1  |
| 492.8667 | -4354 | 1.22E-04 | 544 | 0.333333 | 3.112055 | 148818 | GANC     |
| 359.8965 | -4354 | 1.22E-04 | 513 | 0.333333 | 3.111825 | 140152 | FUNDC2   |
| 781.4765 | -4354 | 1.22E-04 | 548 | 0.333333 | 3.111366 | 271862 | PLA2G10  |
| 520.9224 | -4354 | 1.22E-04 | 573 | 0.333333 | 3.110907 | 156608 | CYP21A2  |

|          |       |          |     |          |          |         |          |
|----------|-------|----------|-----|----------|----------|---------|----------|
| 429.9426 | -4354 | 1.22E-04 | 591 | 0.333333 | 3.110677 | 142590  | CYP3A7   |
| 422.0518 | -4354 | 1.22E-04 | 577 | 0.333333 | 3.110218 | 139552  | LHB      |
| 242.0323 | -4354 | 1.22E-04 | 519 | 0.333333 | 3.110218 | 106316  | PPP3R2   |
| 300.0485 | -4354 | 1.21E-04 | 507 | 0.333333 | 3.108611 | 133984  | EPG5     |
| 246.2956 | -4354 | 1.21E-04 | 503 | 0.333333 | 3.108381 | 97596   | TRPV3    |
| 405.212  | -4354 | 1.21E-04 | 487 | 0.333333 | 3.107463 | 141016  | PLA2G4B  |
| 291.0424 | -4354 | 1.21E-04 | 584 | 0.333333 | 3.106085 | 132254  | CTNND1   |
| 9357.116 | -4354 | 1.21E-04 | 582 | 0.333333 | 3.105396 | 1258222 | UQCRH    |
| 313.4284 | -4354 | 1.21E-04 | 543 | 0.333333 | 3.103559 | 110348  | UBD      |
| 249.3126 | -4354 | 1.21E-04 | 580 | 0.333333 | 3.10333  | 99614   | HLA-DRB5 |
| 193.7395 | -4354 | 1.21E-04 | 466 | 0.333333 | 3.10287  | 101390  | CASTOR1  |
| 392.3564 | -4354 | 1.21E-04 | 516 | 0.333333 | 3.101952 | 123226  | GDF1     |
| 337.488  | -4354 | 1.21E-04 | 510 | 0.333333 | 3.101722 | 116680  | PI4K2B   |
| 305.0857 | -4354 | 1.21E-04 | 514 | 0.333333 | 3.100344 | 106340  | CCL3     |
| 281.7365 | -4354 | 1.21E-04 | 508 | 0.333333 | 3.100115 | 112560  | C4B      |
| 748.8652 | -4354 | 1.21E-04 | 456 | 0.333333 | 3.100115 | 292828  | PPP1R3F  |
| 240.3427 | -4354 | 1.21E-04 | 467 | 0.333333 | 3.099885 | 99780   | MYLK4    |
| 279.5363 | -4354 | 1.21E-04 | 521 | 0.333333 | 3.099656 | 112840  | HSPA1A   |
| 187.0801 | -4354 | 1.21E-04 | 450 | 0.333333 | 3.099656 | 92720   | ATG9B    |
| 283.7918 | -4354 | 1.21E-04 | 467 | 0.333333 | 3.099426 | 105282  | ELOVL1   |
| 358.9843 | -4354 | 1.21E-04 | 596 | 0.333333 | 3.098737 | 111394  | PSME2    |
| 333.9915 | -4354 | 1.21E-04 | 491 | 0.333333 | 3.098048 | 121430  | PRICKLE4 |
| 262.1485 | -4354 | 1.21E-04 | 467 | 0.333333 | 3.09713  | 104172  | UBA7     |
| 264.7116 | -4354 | 1.21E-04 | 445 | 0.333333 | 3.095522 | 88306   | CACNG8   |
| 243.3922 | -4354 | 1.21E-04 | 460 | 0.333333 | 3.095293 | 96498   | TNFSF12  |
| 245.2623 | -4354 | 1.21E-04 | 433 | 0.333333 | 3.094374 | 91234   | PFN4     |
| 281.6965 | -4354 | 1.21E-04 | 459 | 0.333333 | 3.093915 | 106886  | GDF6     |
| 547.4712 | -4354 | 1.20E-04 | 487 | 0.333333 | 3.092767 | 132900  | BMI1     |
| 257.7692 | -4354 | 1.20E-04 | 436 | 0.333333 | 3.092308 | 87300   | SLC2A14  |
| 392.0322 | -4354 | 1.20E-04 | 500 | 0.333333 | 3.091848 | 110744  | POU5F1   |
| 333.8556 | -4354 | 1.20E-04 | 453 | 0.333333 | 3.091848 | 108054  | AMH      |
| 410.2867 | -4354 | 1.20E-04 | 520 | 0.333333 | 3.091389 | 95360   | NDUFA11  |
| 195.6089 | -4354 | 1.20E-04 | 423 | 0.333333 | 3.091389 | 85742   | ACSF3    |
| 259.5008 | -4354 | 1.20E-04 | 515 | 0.333333 | 3.089323 | 91980   | VTN      |
| 238.8501 | -4354 | 1.20E-04 | 468 | 0.333333 | 3.089093 | 96924   | GP1BB    |
| 195.7147 | -4354 | 1.20E-04 | 421 | 0.333333 | 3.089093 | 72186   | MICOS10  |
| 293.1612 | -4354 | 1.20E-04 | 470 | 0.333333 | 3.085419 | 92788   | XCL2     |
| 341.8944 | -4354 | 1.20E-04 | 394 | 0.333333 | 3.085419 | 93880   | AMY1A    |
| 335.9035 | -4354 | 1.20E-04 | 502 | 0.333333 | 3.084501 | 100152  | ORM2     |
| 141.6911 | -4354 | 1.20E-04 | 460 | 0.333333 | 3.084041 | 59278   | HLA-DRB3 |
| 184.9744 | -4354 | 1.20E-04 | 430 | 0.333333 | 3.083582 | 74550   | VEGFD    |



|          |       |          |     |          |          |        |                   |
|----------|-------|----------|-----|----------|----------|--------|-------------------|
| 254.52   | -4354 | 1.20E-04 | 458 | 0.333333 | 3.082893 | 84992  | WNT3A             |
| 213.7574 | -4354 | 1.20E-04 | 393 | 0.333333 | 3.081515 | 84886  | FTMT              |
| 318.2475 | -4354 | 1.20E-04 | 439 | 0.333333 | 3.081056 | 86458  | HOXA9             |
| 282.7323 | -4354 | 1.20E-04 | 429 | 0.333333 | 3.080367 | 84040  | TUBA3C            |
| 349.0941 | -4354 | 1.20E-04 | 529 | 0.333333 | 3.079908 | 82960  | NDUF55            |
| 206.109  | -4354 | 1.20E-04 | 451 | 0.333333 | 3.079449 | 68036  | CFHR1             |
| 434.0244 | -4354 | 1.20E-04 | 425 | 0.333333 | 3.07899  | 149804 | CHMP3             |
| 284.229  | -4354 | 1.20E-04 | 419 | 0.333333 | 3.07899  | 83322  | TUBB8             |
| 196.5112 | -4354 | 1.20E-04 | 383 | 0.333333 | 3.07899  | 79496  | ARHGEF18          |
| 176.8472 | -4354 | 1.20E-04 | 369 | 0.333333 | 3.07853  | 67056  | LIN52             |
| 226.3631 | -4354 | 1.20E-04 | 387 | 0.333333 | 3.078301 | 79524  | BGLAP             |
| 201.621  | -4354 | 1.20E-04 | 413 | 0.333333 | 3.078071 | 65886  | OPN1MW            |
| 257.3544 | -4354 | 1.20E-04 | 401 | 0.333333 | 3.078071 | 80006  | CCL14             |
| 570.0422 | -4354 | 1.20E-04 | 360 | 0.333333 | 3.077842 | 185028 | PPP1R3E           |
| 251.1988 | -4354 | 1.20E-04 | 410 | 0.333333 | 3.077382 | 76520  | CALM3             |
| 190.1524 | -4354 | 1.19E-04 | 399 | 0.333333 | 3.076923 | 68256  | NTF4              |
| 190.9846 | -4354 | 1.19E-04 | 410 | 0.333333 | 3.076464 | 72786  | WNT3              |
| 224.3192 | -4354 | 1.19E-04 | 371 | 0.333333 | 3.075775 | 71320  | LCE1F             |
| 152.1766 | -4354 | 1.19E-04 | 385 | 0.333333 | 3.073938 | 60260  | LEFTY2            |
| 429.9582 | -4354 | 1.19E-04 | 384 | 0.333333 | 3.073708 | 139312 | CHMP4A            |
| 169.4495 | -4354 | 1.19E-04 | 365 | 0.333333 | 3.071871 | 61004  | AQP7              |
| 154.7654 | -4354 | 1.19E-04 | 370 | 0.333333 | 3.071183 | 61194  | ACOT2             |
| 192.6347 | -4354 | 1.19E-04 | 378 | 0.333333 | 3.070034 | 64046  | CSH2              |
| 228.6874 | -4354 | 1.19E-04 | 381 | 0.333333 | 3.069805 | 58684  | GSTA2             |
| 238.2416 | -4354 | 1.19E-04 | 351 | 0.333333 | 3.069346 | 62052  | GBA               |
| 223.6753 | -4354 | 1.19E-04 | 370 | 0.333333 | 3.067509 | 58094  | IFNA6             |
| 121.7817 | -4354 | 1.19E-04 | 358 | 0.333333 | 3.067049 | 47512  | KLRK1             |
| 140.3636 | -4354 | 1.19E-04 | 350 | 0.333333 | 3.065672 | 57492  | EEF2K             |
| 142.7637 | -4354 | 1.19E-04 | 342 | 0.333333 | 3.065672 | 54116  | AP3S2             |
| 131.6313 | -4354 | 1.19E-04 | 330 | 0.333333 | 3.064524 | 42994  | OPN1LW            |
| 165.7845 | -4354 | 1.19E-04 | 299 | 0.333333 | 3.063835 | 52342  | CHRNA7            |
| 170.5572 | -4354 | 1.19E-04 | 310 | 0.333333 | 3.063605 | 52328  | CPT1B             |
| 182.6743 | -4354 | 1.19E-04 | 300 | 0.333333 | 3.062916 | 49092  | FAM180A           |
| 226.9197 | -4354 | 1.19E-04 | 306 | 0.333333 | 3.062227 | 57392  | CCL15             |
| 186.6165 | -4354 | 1.18E-04 | 304 | 0.333333 | 3.061079 | 52906  | ACYP2             |
| 148.5495 | -4354 | 1.18E-04 | 316 | 0.333333 | 3.06062  | 45762  | SGK3              |
| 202.8879 | -4354 | 1.18E-04 | 303 | 0.333333 | 3.06062  | 50824  | JMJD7-<br>PLA2G4B |
| 101.6319 | -4354 | 1.18E-04 | 302 | 0.333333 | 3.059013 | 42840  | DTX2              |
| 115.1938 | -4354 | 1.18E-04 | 327 | 0.333333 | 3.056028 | 41938  | RPS13             |
| 108.1137 | -4354 | 1.18E-04 | 266 | 0.333333 | 3.055109 | 42266  | PDE8B             |
| 204.5066 | -4354 | 1.18E-04 | 281 | 0.333333 | 3.05465  | 37610  | GSTA5             |

|          |       |          |     |          |          |        |          |
|----------|-------|----------|-----|----------|----------|--------|----------|
| 109.7946 | -4354 | 1.18E-04 | 264 | 0.333333 | 3.052813 | 37224  | PPT2     |
| 120.764  | -4354 | 1.18E-04 | 302 | 0.333333 | 3.052583 | 38492  | OMG      |
| 99.00881 | -4354 | 1.18E-04 | 269 | 0.333333 | 3.051894 | 37120  | C4A      |
| 121.5806 | -4354 | 1.18E-04 | 272 | 0.333333 | 3.051435 | 35000  | SYVN1    |
| 115.9759 | -4354 | 1.18E-04 | 269 | 0.333333 | 3.051435 | 36158  | ASIC3    |
| 125.593  | -4354 | 1.18E-04 | 279 | 0.333333 | 3.050746 | 34652  | HOXD3    |
| 883.4602 | -4354 | 1.18E-04 | 253 | 0.333333 | 3.049828 | 438658 | DEFA3    |
| 112.4015 | -4354 | 1.18E-04 | 252 | 0.333333 | 3.049369 | 35352  | FADS6    |
| 84.85072 | -4354 | 1.18E-04 | 276 | 0.333333 | 3.04822  | 28762  | SAA2     |
| 77.65664 | -4354 | 1.18E-04 | 241 | 0.333333 | 3.047532 | 29822  | IRS4     |
| 99.85861 | -4354 | 1.18E-04 | 242 | 0.333333 | 3.046154 | 29430  | TNFRSF6B |
| 107.4526 | -4354 | 1.18E-04 | 239 | 0.333333 | 3.045695 | 30694  | KRT34    |
| 75.28789 | -4354 | 1.18E-04 | 224 | 0.333333 | 3.045695 | 23046  | GPX6     |
| 100.0114 | -4354 | 1.18E-04 | 244 | 0.333333 | 3.044776 | 32188  | MTMR8    |
| 62.65887 | -4354 | 1.17E-04 | 223 | 0.333333 | 3.044317 | 24822  | AKR1C2   |
| 37.53756 | -4354 | 1.17E-04 | 316 | 0.333333 | 3.043858 | 15254  | HLA-DQA2 |
| 98.51789 | -4354 | 1.17E-04 | 210 | 0.333333 | 3.043628 | 26744  | LCE1D    |
| 68.20383 | -4354 | 1.17E-04 | 229 | 0.333333 | 3.04248  | 24940  | DUSP8    |
| 78.0021  | -4354 | 1.17E-04 | 223 | 0.333333 | 3.041791 | 23980  | TOMM7    |
| 63.1959  | -4354 | 1.17E-04 | 217 | 0.333333 | 3.041791 | 21918  | ACOT1    |
| 62.56566 | -4354 | 1.17E-04 | 215 | 0.333333 | 3.040873 | 23888  | CA13     |
| 1068.2   | -4354 | 1.17E-04 | 296 | 0.333333 | 3.040643 | 311462 | NDUFC2   |
| 82.01907 | -4354 | 1.17E-04 | 208 | 0.333333 | 3.038576 | 21612  | SSX2     |
| 55.15253 | -4354 | 1.17E-04 | 229 | 0.333333 | 3.036739 | 20722  | HLA-DQA1 |
| 120.3402 | -4354 | 1.17E-04 | 192 | 0.333333 | 3.03628  | 20344  | AMY1C    |
| 73.00305 | -4354 | 1.17E-04 | 189 | 0.333333 | 3.034673 | 19716  | TRPV1    |
| 18.77997 | -4354 | 1.17E-04 | 200 | 0.333333 | 3.033525 | 7798   | CSNK2A3  |
| 43.27549 | -4354 | 1.17E-04 | 167 | 0.333333 | 3.032147 | 16336  | ASIC5    |
| 89.4447  | -4354 | 1.17E-04 | 170 | 0.333333 | 3.03008  | 19662  | CLDN22   |
| 41.49822 | -4354 | 1.17E-04 | 169 | 0.333333 | 3.029392 | 14152  | BBC3     |
| 7.617443 | -4354 | 1.16E-04 | 169 | 0.333333 | 3.027784 | 3326   | WEE2     |
| 31.18919 | -4354 | 1.16E-04 | 153 | 0.333333 | 3.026406 | 12072  | PLA2G4E  |
| 30.14405 | -4354 | 1.16E-04 | 147 | 0.333333 | 3.025488 | 11424  | TXNRD3   |
| 33.92325 | -4354 | 1.16E-04 | 142 | 0.333333 | 3.025258 | 11602  | CYP4A22  |
| 67.47185 | -4354 | 1.16E-04 | 143 | 0.333333 | 3.024569 | 14098  | FABP12   |
| 50.25091 | -4354 | 1.16E-04 | 143 | 0.333333 | 3.023881 | 11212  | RASA4    |
| 20.755   | -4354 | 1.16E-04 | 120 | 0.333333 | 3.021125 | 6934   | UGT3A2   |
| 25.02132 | -4354 | 1.16E-04 | 129 | 0.333333 | 3.020896 | 8522   | HSPA1B   |
| 41.1111  | -4354 | 1.16E-04 | 128 | 0.333333 | 3.019977 | 8106   | AMY2A    |
| 39.49987 | -4354 | 1.16E-04 | 123 | 0.333333 | 3.017222 | 6512   | TUBA3D   |
| 9.452272 | -4354 | 1.16E-04 | 106 | 0.333333 | 3.015385 | 3940   | IL31     |

|          |       |          |     |          |          |        |              |
|----------|-------|----------|-----|----------|----------|--------|--------------|
| 69.98963 | -4354 | 1.16E-04 | 100 | 0.333333 | 3.014696 | 13002  | NHLRC1       |
| 15.8928  | -4354 | 1.16E-04 | 95  | 0.333333 | 3.014237 | 3702   | KRTAP12-2    |
| 16.78796 | -4354 | 1.16E-04 | 92  | 0.333333 | 3.0124   | 4318   | PFN3         |
| 4.423044 | -4354 | 1.16E-04 | 139 | 0.333333 | 3.011251 | 1540   | PSMB11       |
| 24.27498 | -4354 | 1.16E-04 | 89  | 0.333333 | 3.011251 | 6290   | CCL3L1       |
| 10.21889 | -4354 | 1.16E-04 | 98  | 0.333333 | 3.010792 | 3646   | IFNA13       |
| 10.55128 | -4354 | 1.15E-04 | 87  | 0.333333 | 3.009644 | 3510   | IFNL3        |
| 16.77168 | -4354 | 1.15E-04 | 84  | 0.333333 | 3.008496 | 3072   | AMY2B        |
| 15.96527 | -4354 | 1.15E-04 | 107 | 0.333333 | 3.008266 | 2116   | MT-ATP8      |
| 7.989549 | -4354 | 1.15E-04 | 76  | 0.333333 | 3.008266 | 2622   | STRA8        |
| 5.628847 | -4354 | 1.15E-04 | 67  | 0.333333 | 3.007807 | 2536   | KRTAP5-1     |
| 9.107413 | -4354 | 1.15E-04 | 136 | 0.333333 | 3.006659 | 2422   | MT-ND5       |
| 253.7091 | -4354 | 1.15E-04 | 78  | 0.333333 | 3.006659 | 128784 | DEFA1        |
| 2.935122 | -4354 | 1.15E-04 | 65  | 0.333333 | 3.004133 | 1192   | C8orf44-SGK3 |
| 3.782234 | -4354 | 1.15E-04 | 126 | 0.333333 | 3.003904 | 1136   | MT-ND3       |
| 5.96986  | -4354 | 1.15E-04 | 99  | 0.333333 | 3.003674 | 832    | MT-CYB       |
| 4.661375 | -4354 | 1.15E-04 | 126 | 0.333333 | 3.003215 | 1162   | MT-ND4L      |
| 5.170664 | -4354 | 1.15E-04 | 50  | 0.333333 | 3.002526 | 1524   | AWAT2        |
| 1.710757 | -4354 | 1.15E-04 | 50  | 0.333333 | 2.997704 | 446    | NANOGP8      |
| 2.85626  | -4354 | 1.14E-04 | 60  | 0.333333 | 2.992882 | 542    | MT-CO3       |
| 0.04045  | -4354 | 1.14E-04 | 34  | 0.333333 | 2.992882 | 16     | AMY1B        |
| 0.309977 | -4354 | 1.14E-04 | 31  | 0.333333 | 2.990815 | 162    | SLC2A7       |
| 0.423996 | -4354 | 1.14E-04 | 27  | 0.333333 | 2.988519 | 176    | RASA4B       |
| 0.880203 | -4354 | 1.14E-04 | 48  | 0.333333 | 2.9876   | 212    | TUBA3E       |
| 0.037448 | -4354 | 1.14E-04 | 22  | 0.333333 | 2.982549 | 6      | GSTT2B       |
| 530.5325 | -4354 | 1.14E-04 | 18  | 0.333333 | 2.978645 | 102536 | KRTAP10-7    |
| 0        | -4354 | 1.14E-04 | 50  | 0.25     | 2.977268 | 0      | CCL4L2       |
| 0        | -4354 | 1.14E-04 | 44  | 0.25     | 2.977268 | 0      | CCL3L3       |
| 0        | -4354 | 1.13E-04 | 44  | 0.333333 | 2.973823 | 0      | MT-ND1       |
| 0.07912  | -4354 | 1.13E-04 | 16  | 0.25     | 2.968542 | 38     | PGAM4        |
| 0        | -4354 | 1.13E-04 | 30  | 0.333333 | 2.967394 | 0      | CLDN25       |
| 0        | -4354 | 1.13E-04 | 30  | 0.333333 | 2.967394 | 0      | CLDN24       |
| 0.107245 | -4354 | 1.13E-04 | 12  | 0.25     | 2.960046 | 52     | BUB1B-PAK6   |
| 0.221899 | -4354 | 1.12E-04 | 14  | 0.333333 | 2.947876 | 26     | COMMD3-BMI1  |
| 0.095296 | -4354 | 1.12E-04 | 16  | 0.25     | 2.942135 | 20     | FABP9        |
| 0.034058 | -4354 | 1.10E-04 | 10  | 0.25     | 2.918025 | 14     | BORCS8-MEF2B |
| 0        | -4354 | 1.09E-04 | 13  | 0.333333 | 2.883812 | 0      | RNF103-CHMP3 |
| 0        | -4354 | 1.08E-04 | 10  | 0.25     | 2.877842 | 0      | PLA2G2C      |
| 12.95918 | -4354 | 1.08E-04 | 11  | 0.25     | 2.871183 | 7124   | DEFB4A       |

|          |       |          |    |      |          |       |               |
|----------|-------|----------|----|------|----------|-------|---------------|
| 0.013245 | -4354 | 1.06E-04 | 7  | 0.25 | 2.837887 | 2     | PPP1R3G       |
| 0.007341 | -4354 | 1.06E-04 | 6  | 0.25 | 2.834902 | 4     | BECN2         |
| 3.770769 | -4354 | 1.01E-04 | 10 | 0.25 | 2.735017 | 1506  | DEFA1B        |
| 0        | -4354 | 9.94E-05 | 3  | 0.25 | 2.688634 | 0     | ENO4          |
| 0        | -4354 | 9.91E-05 | 4  | 0.25 | 2.681056 | 0     | EIF4E1B       |
| 71.22253 | -4354 | 9.74E-05 | 7  | 0.25 | 2.641102 | 13380 | KRTAP10-9     |
| 0        | -4354 | 9.60E-05 | 7  | 0.25 | 2.607807 | 0     | DEFB4B        |
| 22.05214 | -4354 | 8.84E-05 | 6  | 0.25 | 2.400459 | 4486  | KRTAP10-4     |
| 0        | -4354 | 8.59E-05 | 2  | 0.25 | 2.325832 | 0     | NDUFC2-KCTD14 |
| 0        | -4354 | 8.29E-05 | 1  | 0.25 | 2.227784 | 0     | RPEL1         |
| 0        | -4354 | 8.04E-05 | 5  | 0.25 | 2.143972 | 0     | KRTAP5-4      |
| 0        | -4354 | 8.04E-05 | 5  | 0.25 | 2.143972 | 0     | KRTAP10-2     |
| 0        | -4354 | 7.94E-05 | 1  | 0.25 | 2.105855 | 0     | UQCRHL        |
| 0        | 4354  | 0        | 0  | 0    | 0        | 0     | CLDN34        |

| <b>Supplementary Table S6: a total of 39 genes were generated through the processing of 4340 genes associated with anti-VEGF resistance</b> |                                                                                                                            |
|---------------------------------------------------------------------------------------------------------------------------------------------|----------------------------------------------------------------------------------------------------------------------------|
| UBC                                                                                                                                         | ubiquitin C [Source:HGNC Symbol;Acc:HGNC:12468]                                                                            |
| BMP4                                                                                                                                        | bone morphogenetic protein 4 [Source:HGNC Symbol;Acc:HGNC:1071]                                                            |
| FMOD                                                                                                                                        | fibromodulin [Source:HGNC Symbol;Acc:HGNC:3774]                                                                            |
| DRD5                                                                                                                                        | dopamine receptor D5 [Source:HGNC Symbol;Acc:HGNC:3026]                                                                    |
| CDH3                                                                                                                                        | cadherin 3 [Source:HGNC Symbol;Acc:HGNC:1762]                                                                              |
| UBB                                                                                                                                         | ubiquitin B [Source:HGNC Symbol;Acc:HGNC:12463]                                                                            |
| TCF7L1                                                                                                                                      | transcription factor 7 like 1 [Source:HGNC Symbol;Acc:HGNC:11640]                                                          |
| YWHAE                                                                                                                                       | tyrosine 3-monooxygenase/tryptophan 5-monooxygenase activation protein epsilon [Source:HGNC Symbol;Acc:HGNC:12851]         |
| PIK3R1                                                                                                                                      | phosphoinositide-3-kinase regulatory subunit 1 [Source:HGNC Symbol;Acc:HGNC:8979]                                          |
| EGFR                                                                                                                                        | epidermal growth factor receptor [Source:HGNC Symbol;Acc:HGNC:3236]                                                        |
| MAPK3                                                                                                                                       | mitogen-activated protein kinase 3 [Source:HGNC Symbol;Acc:HGNC:6877]                                                      |
| MYC                                                                                                                                         | v-myc avian myelocytomatosis viral oncogene homolog [Source:HGNC Symbol;Acc:HGNC:7553]                                     |
| NFKB1                                                                                                                                       | nuclear factor kappa B subunit 1 [Source:HGNC Symbol;Acc:HGNC:7794]                                                        |
| CTNNB1                                                                                                                                      | catenin beta 1 [Source:HGNC Symbol;Acc:HGNC:2514]                                                                          |
| PPARG                                                                                                                                       | peroxisome proliferator activated receptor gamma [Source:HGNC Symbol;Acc:HGNC:9236]                                        |
| PRL                                                                                                                                         | prolactin [Source:HGNC Symbol;Acc:HGNC:9445]                                                                               |
| PRKCQ                                                                                                                                       | protein kinase C theta [Source:HGNC Symbol;Acc:HGNC:9410]                                                                  |
| TMSB4X                                                                                                                                      | thymosin beta 4, X-linked [Source:HGNC Symbol;Acc:HGNC:11881]                                                              |
| CLIC1                                                                                                                                       | chloride intracellular channel 1 [Source:HGNC Symbol;Acc:HGNC:2062]                                                        |
| VEGFC                                                                                                                                       | vascular endothelial growth factor C [Source:HGNC Symbol;Acc:HGNC:12682]                                                   |
| KRTAP4-1                                                                                                                                    | keratin associated protein 4-1 [Source:HGNC Symbol;Acc:HGNC:18907]                                                         |
| WT1                                                                                                                                         | Wilms tumor 1 [Source:HGNC Symbol;Acc:HGNC:12796]                                                                          |
| ENO2                                                                                                                                        | enolase 2 [Source:HGNC Symbol;Acc:HGNC:3353]                                                                               |
| RAC1                                                                                                                                        | ras-related C3 botulinum toxin substrate 1 (rho family, small GTP binding protein Rac1) [Source:HGNC Symbol;Acc:HGNC:9801] |
| RPE                                                                                                                                         | ribulose-5-phosphate-3-epimerase [Source:HGNC Symbol;Acc:HGNC:10293]                                                       |
| PLA2G2D                                                                                                                                     | phospholipase A2 group IID [Source:HGNC Symbol;Acc:HGNC:9033]                                                              |
| DEFA5                                                                                                                                       | defensin alpha 5 [Source:HGNC Symbol;Acc:HGNC:2764]                                                                        |
| UVRAG                                                                                                                                       | UV radiation resistance associated [Source:HGNC Symbol;Acc:HGNC:12640]                                                     |
| ADCY6                                                                                                                                       | adenylate cyclase 6 [Source:HGNC Symbol;Acc:HGNC:237]                                                                      |
| UQCRH                                                                                                                                       | ubiquinol-cytochrome c reductase hinge protein [Source:HGNC Symbol;Acc:HGNC:12590]                                         |
| ITPKC                                                                                                                                       | inositol-trisphosphate 3-kinase C [Source:HGNC Symbol;Acc:HGNC:14897]                                                      |
| FOXF2                                                                                                                                       | forkhead box F2 [Source:HGNC Symbol;Acc:HGNC:3810]                                                                         |
| CLDN10                                                                                                                                      | claudin 10 [Source:HGNC Symbol;Acc:HGNC:2033]                                                                              |
| TUBA1A                                                                                                                                      | tubulin alpha 1a [Source:HGNC Symbol;Acc:HGNC:20766]                                                                       |
| EDAR                                                                                                                                        | ectodysplasin A receptor [Source:HGNC Symbol;Acc:HGNC:2895]                                                                |
| PLD2                                                                                                                                        | phospholipase D2 [Source:HGNC Symbol;Acc:HGNC:9068]                                                                        |
| ATP12A                                                                                                                                      | ATPase H <sup>+</sup> /K <sup>+</sup> transporting non-gastric alpha2 subunit [Source:HGNC Symbol;Acc:HGNC:13816]          |
| TINAGL1                                                                                                                                     | tubulointerstitial nephritis antigen like 1 [Source:HGNC Symbol;Acc:HGNC:19168]                                            |

|        |                                                |
|--------|------------------------------------------------|
| CLDN34 | claudin 34 [Source:HGNC Symbol;Acc:HGNC:51259] |
|--------|------------------------------------------------|

**Supplementary Table S7: a total of 52 genes were generated through the processing of 7061 genes associated with nAMD disease**

|          |                                                                                                        |
|----------|--------------------------------------------------------------------------------------------------------|
| UBC      | ubiquitin C [Source:HGNC Symbol;Acc:HGNC:12468]                                                        |
| APP      | amyloid beta precursor protein [Source:HGNC Symbol;Acc:HGNC:620]                                       |
| FN1      | fibronectin 1 [Source:HGNC Symbol;Acc:HGNC:3778]                                                       |
| JUN      | Jun proto-oncogene, AP-1 transcription factor subunit [Source:HGNC Symbol;Acc:HGNC:6204]               |
| EGFR     | epidermal growth factor receptor [Source:HGNC Symbol;Acc:HGNC:3236]                                    |
| AUTS2    | autism susceptibility candidate 2 [Source:HGNC Symbol;Acc:HGNC:14262]                                  |
| XPO1     | exportin 1 [Source:HGNC Symbol;Acc:HGNC:12825]                                                         |
| CTNNB1   | catenin beta 1 [Source:HGNC Symbol;Acc:HGNC:2514]                                                      |
| PPP3CA   | protein phosphatase 3 catalytic subunit alpha [Source:HGNC Symbol;Acc:HGNC:9314]                       |
| SRPK1    | SRSF protein kinase 1 [Source:HGNC Symbol;Acc:HGNC:11305]                                              |
| KCNIP4   | potassium voltage-gated channel interacting protein 4 [Source:HGNC Symbol;Acc:HGNC:30083]              |
| PIK3R1   | phosphoinositide-3-kinase regulatory subunit 1 [Source:HGNC Symbol;Acc:HGNC:8979]                      |
| RDX      | radixin [Source:HGNC Symbol;Acc:HGNC:9944]                                                             |
| HNRNPD   | heterogeneous nuclear ribonucleoprotein D [Source:HGNC Symbol;Acc:HGNC:5036]                           |
| NTRK2    | neurotrophic receptor tyrosine kinase 2 [Source:HGNC Symbol;Acc:HGNC:8032]                             |
| MUC1     | mucin 1, cell surface associated [Source:HGNC Symbol;Acc:HGNC:7508]                                    |
| DLG2     | discs large MAGUK scaffold protein 2 [Source:HGNC Symbol;Acc:HGNC:2901]                                |
| CAND1    | cullin associated and neddylation dissociated 1 [Source:HGNC Symbol;Acc:HGNC:30688]                    |
| DAPK1    | death associated protein kinase 1 [Source:HGNC Symbol;Acc:HGNC:2674]                                   |
| RFC3     | replication factor C subunit 3 [Source:HGNC Symbol;Acc:HGNC:9971]                                      |
| DAB1     | DAB1, reelin adaptor protein [Source:HGNC Symbol;Acc:HGNC:2661]                                        |
| PIWIL1   | piwi like RNA-mediated gene silencing 1 [Source:HGNC Symbol;Acc:HGNC:9007]                             |
| PRL      | prolactin [Source:HGNC Symbol;Acc:HGNC:9445]                                                           |
| FOXP1    | forkhead box P1 [Source:HGNC Symbol;Acc:HGNC:3823]                                                     |
| UQCRCF51 | ubiquinol-cytochrome c reductase, Rieske iron-sulfur polypeptide 1 [Source:HGNC Symbol;Acc:HGNC:12587] |
| PARK2    | parkin RBR E3 ubiquitin protein ligase [Source:HGNC Symbol;Acc:HGNC:8607]                              |
| TCF4     | transcription factor 4 [Source:HGNC Symbol;Acc:HGNC:11634]                                             |
| PBX1     | PBX homeobox 1 [Source:HGNC Symbol;Acc:HGNC:8632]                                                      |
| PRAMEF14 | PRAME family member 14 [Source:HGNC Symbol;Acc:HGNC:13576]                                             |
| PRAMEF1  | PRAME family member 1 [Source:HGNC Symbol;Acc:HGNC:28840]                                              |
| SPDYE3   | speedy/RINGO cell cycle regulator family member E3 [Source:HGNC Symbol;Acc:HGNC:35462]                 |
| SPDYE1   | speedy/RINGO cell cycle regulator family member E1 [Source:HGNC Symbol;Acc:HGNC:16408]                 |
| SPDYE2   | speedy/RINGO cell cycle regulator family member E2 [Source:HGNC Symbol;Acc:HGNC:33841]                 |
| KRTAP5-2 | keratin associated protein 5-2 [Source:HGNC Symbol;Acc:HGNC:23597]                                     |
| OR1J1    | olfactory receptor family 1 subfamily J member 1 [Source:HGNC Symbol;Acc:HGNC:8208]                    |
| OR8B2    | olfactory receptor family 8 subfamily B member 2 [Source:HGNC Symbol;Acc:HGNC:8471]                    |
| OR4D5    | olfactory receptor family 4 subfamily D member 5 [Source:HGNC Symbol;Acc:HGNC:14852]                   |
| OR4X1    | olfactory receptor family 4 subfamily X member 1 (gene/pseudogene) [Source:HGNC Symbol;Acc:HGNC:14854] |

|          |                                                                                       |
|----------|---------------------------------------------------------------------------------------|
| OR5B3    | olfactory receptor family 5 subfamily B member 3 [Source:HGNC Symbol;Acc:HGNC:8324]   |
| OR2Y1    | olfactory receptor family 2 subfamily Y member 1 [Source:HGNC Symbol;Acc:HGNC:14837]  |
| KRTAP2-1 | keratin associated protein 2-1 [Source:HGNC Symbol;Acc:HGNC:16775]                    |
| OR5AN1   | olfactory receptor family 5 subfamily AN member 1 [Source:HGNC Symbol;Acc:HGNC:15255] |
| OR4Q3    | olfactory receptor family 4 subfamily Q member 3 [Source:HGNC Symbol;Acc:HGNC:15426]  |
| OR10P1   | olfactory receptor family 10 subfamily P member 1 [Source:HGNC Symbol;Acc:HGNC:15378] |
| OR8B8    | olfactory receptor family 8 subfamily B member 8 [Source:HGNC Symbol;Acc:HGNC:8477]   |
| OR51B4   | olfactory receptor family 51 subfamily B member 4 [Source:HGNC Symbol;Acc:HGNC:14708] |
| OR10J1   | olfactory receptor family 10 subfamily J member 1 [Source:HGNC Symbol;Acc:HGNC:8175]  |
| CT45A5   | cancer/testis antigen family 45, member A5 [Source:HGNC Symbol;Acc:HGNC:33270]        |
| FRG2C    | FSHD region gene 2 family member C [Source:HGNC Symbol;Acc:HGNC:33626]                |
| FRG2B    | FSHD region gene 2 family member B [Source:HGNC Symbol;Acc:HGNC:33518]                |
| PLXDC2   | plexin domain containing 2 [Source:HGNC Symbol;Acc:HGNC:21013]                        |
| IQGAP2   | IQ motif containing GTPase activating protein 2 [Source:HGNC Symbol;Acc:HGNC:6111]    |



| <b>Supplementary Table S8: The integration of the MuST and DIAMOnD results, anti-VEGF resistance and nAMD related Hub genes</b> |                                                                                               |
|---------------------------------------------------------------------------------------------------------------------------------|-----------------------------------------------------------------------------------------------|
| ABCA4                                                                                                                           | ATP binding cassette subfamily A member 4 [Source:HGNC Symbol;Acc:HGNC:34]                    |
| VEGFA                                                                                                                           | vascular endothelial growth factor A [Source:HGNC Symbol;Acc:HGNC:12680]                      |
| RAB1A                                                                                                                           | RAB1A, member RAS oncogene family [Source:HGNC Symbol;Acc:HGNC:9758]                          |
| TNFRSF10A                                                                                                                       | tumor necrosis factor receptor superfamily member 10a [Source:HGNC Symbol;Acc:HGNC:11904]     |
| ERCC6                                                                                                                           | ERCC excision repair 6, chromatin remodeling factor [Source:HGNC Symbol;Acc:HGNC:3438]        |
| C1QTNF5                                                                                                                         | C1q and tumor necrosis factor related protein 5 [Source:HGNC Symbol;Acc:HGNC:14344]           |
| MYC                                                                                                                             | v-myc avian myelocytomatosis viral oncogene homolog [Source:HGNC Symbol;Acc:HGNC:7553]        |
| NEFM                                                                                                                            | neurofilament, medium polypeptide [Source:HGNC Symbol;Acc:HGNC:7734]                          |
| C9                                                                                                                              | complement component 9 [Source:HGNC Symbol;Acc:HGNC:1358]                                     |
| IRAK1                                                                                                                           | interleukin 1 receptor associated kinase 1 [Source:HGNC Symbol;Acc:HGNC:6112]                 |
| C2                                                                                                                              | complement component 2 [Source:HGNC Symbol;Acc:HGNC:1248]                                     |
| C3                                                                                                                              | complement component 3 [Source:HGNC Symbol;Acc:HGNC:1318]                                     |
| NPM1                                                                                                                            | nucleophosmin (nucleolar phosphoprotein B23, numatrin) [Source:HGNC Symbol;Acc:HGNC:7910]     |
| TLR4                                                                                                                            | toll like receptor 4 [Source:HGNC Symbol;Acc:HGNC:11850]                                      |
| SLC16A8                                                                                                                         | solute carrier family 16 member 8 [Source:HGNC Symbol;Acc:HGNC:16270]                         |
| HIF1A                                                                                                                           | hypoxia inducible factor 1 alpha subunit [Source:HGNC Symbol;Acc:HGNC:4910]                   |
| TIMP3                                                                                                                           | TIMP metalloproteinase inhibitor 3 [Source:HGNC Symbol;Acc:HGNC:11822]                        |
| IQCB1                                                                                                                           | IQ motif containing B1 [Source:HGNC Symbol;Acc:HGNC:28949]                                    |
| UBA52                                                                                                                           | ubiquitin A-52 residue ribosomal protein fusion product 1 [Source:HGNC Symbol;Acc:HGNC:12458] |
| RPGR                                                                                                                            | retinitis pigmentosa GTPase regulator [Source:HGNC Symbol;Acc:HGNC:10295]                     |
| VWCE                                                                                                                            | von Willebrand factor C and EGF domains [Source:HGNC Symbol;Acc:HGNC:26487]                   |
| CFH                                                                                                                             | complement factor H [Source:HGNC Symbol;Acc:HGNC:4883]                                        |
| NMNAT1                                                                                                                          | nicotinamide nucleotide adenyltransferase 1 [Source:HGNC Symbol;Acc:HGNC:17877]               |
| TGM2                                                                                                                            | transglutaminase 2 [Source:HGNC Symbol;Acc:HGNC:11778]                                        |
| CFI                                                                                                                             | complement factor I [Source:HGNC Symbol;Acc:HGNC:5394]                                        |
| APOE                                                                                                                            | apolipoprotein E [Source:HGNC Symbol;Acc:HGNC:613]                                            |
| COPS6                                                                                                                           | COP9 signalosome subunit 6 [Source:HGNC Symbol;Acc:HGNC:21749]                                |
| SQSTM1                                                                                                                          | sequestosome 1 [Source:HGNC Symbol;Acc:HGNC:11280]                                            |
| SLC2A4                                                                                                                          | solute carrier family 2 member 4 [Source:HGNC Symbol;Acc:HGNC:11009]                          |
| CFB                                                                                                                             | complement factor B [Source:HGNC Symbol;Acc:HGNC:1037]                                        |
| KDM5B                                                                                                                           | lysine demethylase 5B [Source:HGNC Symbol;Acc:HGNC:18039]                                     |
| LTBP1                                                                                                                           | latent transforming growth factor beta binding protein 1 [Source:HGNC Symbol;Acc:HGNC:6714]   |
| SERPINA1                                                                                                                        | serpin family A member 1 [Source:HGNC Symbol;Acc:HGNC:8941]                                   |
| CD46                                                                                                                            | CD46 molecule [Source:HGNC Symbol;Acc:HGNC:6953]                                              |
| VCAN                                                                                                                            | versican [Source:HGNC Symbol;Acc:HGNC:2464]                                                   |

|             |                                                                                            |
|-------------|--------------------------------------------------------------------------------------------|
| ANTXR2      | anthrax toxin receptor 2 [Source:HGNC Symbol;Acc:HGNC:21732]                               |
| SNX27       | sorting nexin family member 27 [Source:HGNC Symbol;Acc:HGNC:20073]                         |
| APP         | amyloid beta precursor protein [Source:HGNC Symbol;Acc:HGNC:620]                           |
| P3H3        | prolyl 3-hydroxylase 3 [Source:HGNC Symbol;Acc:HGNC:19318]                                 |
| KLK3        | kallikrein related peptidase 3 [Source:HGNC Symbol;Acc:HGNC:6364]                          |
| LAMA1       | laminin subunit alpha 1 [Source:HGNC Symbol;Acc:HGNC:6481]                                 |
| ADAMTS1     | ADAM metallopeptidase with thrombospondin type 1 motif 1 [Source:HGNC Symbol;Acc:HGNC:217] |
| SERPINA3    | serpin family A member 3 [Source:HGNC Symbol;Acc:HGNC:16]                                  |
| VWF         | von Willebrand factor [Source:HGNC Symbol;Acc:HGNC:12726]                                  |
| PDGFA       | platelet derived growth factor subunit A [Source:HGNC Symbol;Acc:HGNC:8799]                |
| PDGFB       | platelet derived growth factor subunit B [Source:HGNC Symbol;Acc:HGNC:8800]                |
| CST3        | cystatin C [Source:HGNC Symbol;Acc:HGNC:2475]                                              |
| SERPINE2    | serpin family E member 2 [Source:HGNC Symbol;Acc:HGNC:8951]                                |
| A2M         | alpha-2-macroglobulin [Source:HGNC Symbol;Acc:HGNC:7]                                      |
| PXN         | paxillin [Source:HGNC Symbol;Acc:HGNC:9718]                                                |
| VTN         | vitronectin [Source:HGNC Symbol;Acc:HGNC:12724]                                            |
| SERPINB6    | serpin family B member 6 [Source:HGNC Symbol;Acc:HGNC:8950]                                |
| CX3CL1      | C-X3-C motif chemokine ligand 1 [Source:HGNC Symbol;Acc:HGNC:10647]                        |
| CPB2        | carboxypeptidase B2 [Source:HGNC Symbol;Acc:HGNC:2300]                                     |
| COL18A1     | collagen type XVIII alpha 1 chain [Source:HGNC Symbol;Acc:HGNC:2195]                       |
| CP          | ceruloplasmin [Source:HGNC Symbol;Acc:HGNC:2295]                                           |
| AMBP        | alpha-1-microglobulin/bikunin precursor [Source:HGNC Symbol;Acc:HGNC:453]                  |
| FBN2        | fibrillin 2 [Source:HGNC Symbol;Acc:HGNC:3604]                                             |
| FBN1        | fibrillin 1 [Source:HGNC Symbol;Acc:HGNC:3603]                                             |
| CALR        | calreticulin [Source:HGNC Symbol;Acc:HGNC:1455]                                            |
| SERPINE1    | serpin family E member 1 [Source:HGNC Symbol;Acc:HGNC:8583]                                |
| CXCL12      | C-X-C motif chemokine ligand 12 [Source:HGNC Symbol;Acc:HGNC:10672]                        |
| ITGA2       | integrin subunit alpha 2 [Source:HGNC Symbol;Acc:HGNC:6137]                                |
| FCN2        | ficolin 2 [Source:HGNC Symbol;Acc:HGNC:3624]                                               |
| CTGF (CCN2) | connective tissue growth factor [Source:HGNC Symbol;Acc:HGNC:2500]                         |
| FN1         | fibronectin 1 [Source:HGNC Symbol;Acc:HGNC:3778]                                           |
| DPT         | dermatopontin [Source:HGNC Symbol;Acc:HGNC:3011]                                           |
| CD36        | CD36 molecule [Source:HGNC Symbol;Acc:HGNC:1663]                                           |
| FCN1        | ficolin 1 [Source:HGNC Symbol;Acc:HGNC:3623]                                               |
| ACHE        | acetylcholinesterase (Cartwright blood group) [Source:HGNC Symbol;Acc:HGNC:108]            |
| MAG         | myelin associated glycoprotein [Source:HGNC Symbol;Acc:HGNC:6783]                          |
| ITGAM       | integrin subunit alpha M [Source:HGNC Symbol;Acc:HGNC:6149]                                |
| DEFA1B      | defensin alpha 1B [Source:HGNC Symbol;Acc:HGNC:33596]                                      |
| COLGALT2    | collagen beta(1-O)galactosyltransferase 2 [Source:HGNC Symbol;Acc:HGNC:16790]              |

|          |                                                                                               |
|----------|-----------------------------------------------------------------------------------------------|
| CR1      | complement component 3b/4b receptor 1 (Knops blood group) [Source:HGNC Symbol;Acc:HGNC:2334]  |
| SERPING1 | serpin family G member 1 [Source:HGNC Symbol;Acc:HGNC:1228]                                   |
| C1QA     | complement component 1, q subcomponent, A chain [Source:HGNC Symbol;Acc:HGNC:1241]            |
| ITGA2B   | integrin subunit alpha 2b [Source:HGNC Symbol;Acc:HGNC:6138]                                  |
| C1QB     | complement component 1, q subcomponent, B chain [Source:HGNC Symbol;Acc:HGNC:1242]            |
| IGLL5    | immunoglobulin lambda like polypeptide 5 [Source:HGNC Symbol;Acc:HGNC:38476]                  |
| C1QC     | complement component 1, q subcomponent, C chain [Source:HGNC Symbol;Acc:HGNC:1245]            |
| C1R      | complement C1r subcomponent [Source:HGNC Symbol;Acc:HGNC:1246]                                |
| DDX19B   | DEAD-box helicase 19B [Source:HGNC Symbol;Acc:HGNC:2742]                                      |
| C1S      | complement component 1, s subcomponent [Source:HGNC Symbol;Acc:HGNC:1247]                     |
| ITGA5    | integrin subunit alpha 5 [Source:HGNC Symbol;Acc:HGNC:6141]                                   |
| COL14A1  | collagen type XIV alpha 1 chain [Source:HGNC Symbol;Acc:HGNC:2191]                            |
| PF4      | platelet factor 4 [Source:HGNC Symbol;Acc:HGNC:8861]                                          |
| ITGB3    | integrin subunit beta 3 [Source:HGNC Symbol;Acc:HGNC:6156]                                    |
| CFP      | complement factor properdin [Source:HGNC Symbol;Acc:HGNC:8864]                                |
| SAA1     | serum amyloid A1 [Source:HGNC Symbol;Acc:HGNC:10513]                                          |
| FGA      | fibrinogen alpha chain [Source:HGNC Symbol;Acc:HGNC:3661]                                     |
| C1QTNF2  | C1q and tumor necrosis factor related protein 2 [Source:HGNC Symbol;Acc:HGNC:14325]           |
| TNFAIP6  | TNF alpha induced protein 6 [Source:HGNC Symbol;Acc:HGNC:11898]                               |
| KLK13    | kallikrein related peptidase 13 [Source:HGNC Symbol;Acc:HGNC:6361]                            |
| MASP2    | mannan binding lectin serine peptidase 2 [Source:HGNC Symbol;Acc:HGNC:6902]                   |
| CD44     | CD44 molecule (Indian blood group) [Source:HGNC Symbol;Acc:HGNC:1681]                         |
| C4A      | complement component 4A (Rodgers blood group) [Source:HGNC Symbol;Acc:HGNC:1323]              |
| C4B      | complement component 4B (Chido blood group) [Source:HGNC Symbol;Acc:HGNC:1324]                |
| C4BPA    | complement component 4 binding protein alpha [Source:HGNC Symbol;Acc:HGNC:1325]               |
| MYOC     | myocilin [Source:HGNC Symbol;Acc:HGNC:7610]                                                   |
| ITGAV    | integrin subunit alpha V [Source:HGNC Symbol;Acc:HGNC:6150]                                   |
| PROC     | protein C, inactivator of coagulation factors Va and VIIIa [Source:HGNC Symbol;Acc:HGNC:9451] |
| ITGB1    | integrin subunit beta 1 [Source:HGNC Symbol;Acc:HGNC:6153]                                    |
| C5       | complement component 5 [Source:HGNC Symbol;Acc:HGNC:1331]                                     |
| PROS1    | protein S (alpha) [Source:HGNC Symbol;Acc:HGNC:9456]                                          |
| TFAP2C   | transcription factor AP-2 gamma [Source:HGNC Symbol;Acc:HGNC:11744]                           |
| COL4A4   | collagen type IV alpha 4 chain [Source:HGNC Symbol;Acc:HGNC:2206]                             |
| COL4A3   | collagen type IV alpha 3 chain [Source:HGNC Symbol;Acc:HGNC:2204]                             |
| COL4A2   | collagen type IV alpha 2 [Source:HGNC Symbol;Acc:HGNC:2203]                                   |

|        |                                                                                 |
|--------|---------------------------------------------------------------------------------|
| FGF7   | fibroblast growth factor 7 [Source:HGNC Symbol;Acc:HGNC:3685]                   |
| COL4A1 | collagen type IV alpha 1 chain [Source:HGNC Symbol;Acc:HGNC:2202]               |
| COL3A1 | collagen type III alpha 1 chain [Source:HGNC Symbol;Acc:HGNC:2201]              |
| COL2A1 | collagen type II alpha 1 chain [Source:HGNC Symbol;Acc:HGNC:2200]               |
| HSPG2  | heparan sulfate proteoglycan 2 [Source:HGNC Symbol;Acc:HGNC:5273]               |
| ELN    | elastin [Source:HGNC Symbol;Acc:HGNC:3327]                                      |
| FGF2   | fibroblast growth factor 2 [Source:HGNC Symbol;Acc:HGNC:3676]                   |
| COL1A2 | collagen type I alpha 2 chain [Source:HGNC Symbol;Acc:HGNC:2198]                |
| COL1A1 | collagen type I alpha 1 [Source:HGNC Symbol;Acc:HGNC:2197]                      |
| FGB    | fibrinogen beta chain [Source:HGNC Symbol;Acc:HGNC:3662]                        |
| TF     | transferrin [Source:HGNC Symbol;Acc:HGNC:11740]                                 |
| TFPI   | tissue factor pathway inhibitor [Source:HGNC Symbol;Acc:HGNC:11760]             |
| TTR    | transthyretin [Source:HGNC Symbol;Acc:HGNC:12405]                               |
| KLK6   | kallikrein related peptidase 6 [Source:HGNC Symbol;Acc:HGNC:6367]               |
| COL9A1 | collagen type IX alpha 1 [Source:HGNC Symbol;Acc:HGNC:2217]                     |
| COL8A2 | collagen type VIII alpha 2 [Source:HGNC Symbol;Acc:HGNC:2216]                   |
| COL7A1 | collagen type VII alpha 1 [Source:HGNC Symbol;Acc:HGNC:2214]                    |
| COL6A2 | collagen type VI alpha 2 [Source:HGNC Symbol;Acc:HGNC:2212]                     |
| COL6A1 | collagen type VI alpha 1 [Source:HGNC Symbol;Acc:HGNC:2211]                     |
| COL5A1 | collagen type V alpha 1 [Source:HGNC Symbol;Acc:HGNC:2209]                      |
| COL4A6 | collagen type IV alpha 6 chain [Source:HGNC Symbol;Acc:HGNC:2208]               |
| COL4A5 | collagen type IV alpha 5 chain [Source:HGNC Symbol;Acc:HGNC:2207]               |
| LAMA3  | laminin subunit alpha 3 [Source:HGNC Symbol;Acc:HGNC:6483]                      |
| MMP1   | matrix metallopeptidase 1 [Source:HGNC Symbol;Acc:HGNC:7155]                    |
| MMP2   | matrix metallopeptidase 2 [Source:HGNC Symbol;Acc:HGNC:7166]                    |
| MMP3   | matrix metallopeptidase 3 [Source:HGNC Symbol;Acc:HGNC:7173]                    |
| MMP7   | matrix metallopeptidase 7 [Source:HGNC Symbol;Acc:HGNC:7174]                    |
| MASP1  | mannan binding lectin serine peptidase 1 [Source:HGNC Symbol;Acc:HGNC:6901]     |
| MMP9   | matrix metallopeptidase 9 [Source:HGNC Symbol;Acc:HGNC:7176]                    |
| MMP10  | matrix metallopeptidase 10 [Source:HGNC Symbol;Acc:HGNC:7156]                   |
| TGFB1  | transforming growth factor beta induced [Source:HGNC Symbol;Acc:HGNC:11771]     |
| DDX31  | DEAD-box helicase 31 [Source:HGNC Symbol;Acc:HGNC:16715]                        |
| IGFBP3 | insulin like growth factor binding protein 3 [Source:HGNC Symbol;Acc:HGNC:5472] |
| IGFBP2 | insulin like growth factor binding protein 2 [Source:HGNC Symbol;Acc:HGNC:5471] |
| IGFBP1 | insulin like growth factor binding protein 1 [Source:HGNC Symbol;Acc:HGNC:5469] |
| F5     | coagulation factor V [Source:HGNC Symbol;Acc:HGNC:3542]                         |
| HP     | haptoglobin [Source:HGNC Symbol;Acc:HGNC:5141]                                  |
| TGFB1  | transforming growth factor beta 1 [Source:HGNC Symbol;Acc:HGNC:11766]           |
| IGF2   | insulin like growth factor 2 [Source:HGNC Symbol;Acc:HGNC:5466]                 |
| AHSG   | alpha 2-HS glycoprotein [Source:HGNC Symbol;Acc:HGNC:349]                       |
| LAMC1  | laminin subunit gamma 1 [Source:HGNC Symbol;Acc:HGNC:6492]                      |

|         |                                                                                                 |
|---------|-------------------------------------------------------------------------------------------------|
| F2      | coagulation factor II, thrombin [Source:HGNC Symbol;Acc:HGNC:3535]                              |
| BGN     | biglycan [Source:HGNC Symbol;Acc:HGNC:1044]                                                     |
| FGG     | fibrinogen gamma chain [Source:HGNC Symbol;Acc:HGNC:3694]                                       |
| LAMA5   | laminin subunit alpha 5 [Source:HGNC Symbol;Acc:HGNC:6485]                                      |
| LAMB1   | laminin subunit beta 1 [Source:HGNC Symbol;Acc:HGNC:6486]                                       |
| THBS1   | thrombospondin 1 [Source:HGNC Symbol;Acc:HGNC:11785]                                            |
| THBD    | thrombomodulin [Source:HGNC Symbol;Acc:HGNC:11784]                                              |
| PTPRK   | protein tyrosine phosphatase, receptor type K [Source:HGNC Symbol;Acc:HGNC:9674]                |
| F13A1   | coagulation factor XIII A chain [Source:HGNC Symbol;Acc:HGNC:3531]                              |
| VKORC1  | vitamin K epoxide reductase complex subunit 1 [Source:HGNC Symbol;Acc:HGNC:23663]               |
| F11     | coagulation factor XI [Source:HGNC Symbol;Acc:HGNC:3529]                                        |
| MIS12   | MIS12, kinetochore complex component [Source:HGNC Symbol;Acc:HGNC:24967]                        |
| C4B_2   | complement component 4B (Chido blood group), copy 2 [Source:HGNC Symbol;Acc:HGNC:42398]         |
| F10     | coagulation factor X [Source:HGNC Symbol;Acc:HGNC:3528]                                         |
| IGFBP5  | insulin like growth factor binding protein 5 [Source:HGNC Symbol;Acc:HGNC:5474]                 |
| F8      | coagulation factor VIII [Source:HGNC Symbol;Acc:HGNC:3546]                                      |
| CA8     | carbonic anhydrase 8 [Source:HGNC Symbol;Acc:HGNC:1382]                                         |
| CD93    | CD93 molecule [Source:HGNC Symbol;Acc:HGNC:15855]                                               |
| BMP1    | bone morphogenetic protein 1 [Source:HGNC Symbol;Acc:HGNC:1067]                                 |
| PRELP   | proline and arginine rich end leucine rich repeat protein [Source:HGNC Symbol;Acc:HGNC:9357]    |
| PITX3   | paired like homeodomain 3 [Source:HGNC Symbol;Acc:HGNC:9006]                                    |
| CTRB1   | chymotrypsinogen B1 [Source:HGNC Symbol;Acc:HGNC:2521]                                          |
| GDPD1   | glycerophosphodiester phosphodiesterase domain containing 1 [Source:HGNC Symbol;Acc:HGNC:20883] |
| PLA2G2A | phospholipase A2 group IIA [Source:HGNC Symbol;Acc:HGNC:9031]                                   |
| HPX     | hemopexin [Source:HGNC Symbol;Acc:HGNC:5171]                                                    |
| CTSL    | cathepsin L [Source:HGNC Symbol;Acc:HGNC:2537]                                                  |
| DCN     | decorin [Source:HGNC Symbol;Acc:HGNC:2705]                                                      |
| KLK1    | kallikrein 1 [Source:HGNC Symbol;Acc:HGNC:6357]                                                 |
| CTSG    | cathepsin G [Source:HGNC Symbol;Acc:HGNC:2532]                                                  |
| KLK2    | kallikrein related peptidase 2 [Source:HGNC Symbol;Acc:HGNC:6363]                               |
| ELANE   | elastase, neutrophil expressed [Source:HGNC Symbol;Acc:HGNC:3309]                               |
| MEP1A   | meprin A subunit alpha [Source:HGNC Symbol;Acc:HGNC:7015]                                       |
| LCAT    | lecithin-cholesterol acyltransferase [Source:HGNC Symbol;Acc:HGNC:6522]                         |
| TIMP1   | TIMP metalloproteinase inhibitor 1 [Source:HGNC Symbol;Acc:HGNC:11820]                          |
| ZNF558  | zinc finger protein 558 [Source:HGNC Symbol;Acc:HGNC:26422]                                     |
| HRG     | histidine rich glycoprotein [Source:HGNC Symbol;Acc:HGNC:5181]                                  |
| HAPLN1  | hyaluronan and proteoglycan link protein 1 [Source:HGNC Symbol;Acc:HGNC:2380]                   |
| KNG1    | kininogen 1 [Source:HGNC Symbol;Acc:HGNC:6383]                                                  |

|          |                                                                                                                                |
|----------|--------------------------------------------------------------------------------------------------------------------------------|
| CRP      | C-reactive protein, pentraxin-related [Source:HGNC Symbol;Acc:HGNC:2367]                                                       |
| HABP2    | hyaluronan binding protein 2 [Source:HGNC Symbol;Acc:HGNC:4798]                                                                |
| MFAP2    | microfibrillar associated protein 2 [Source:HGNC Symbol;Acc:HGNC:7033]                                                         |
| PLAT     | plasminogen activator, tissue type [Source:HGNC Symbol;Acc:HGNC:9051]                                                          |
| PLAU     | plasminogen activator, urokinase [Source:HGNC Symbol;Acc:HGNC:9052]                                                            |
| ECE1     | endothelin converting enzyme 1 [Source:HGNC Symbol;Acc:HGNC:3146]                                                              |
| PLG      | plasminogen [Source:HGNC Symbol;Acc:HGNC:9071]                                                                                 |
| SERPINF2 | serpin family F member 2 [Source:HGNC Symbol;Acc:HGNC:9075]                                                                    |
| FBLN2    | fibulin 2 [Source:HGNC Symbol;Acc:HGNC:3601]                                                                                   |
| COLQ     | collagen-like tail subunit (single strand of homotrimer) of asymmetric acetylcholinesterase [Source:HGNC Symbol;Acc:HGNC:2226] |
| NID2     | nidogen 2 [Source:HGNC Symbol;Acc:HGNC:13389]                                                                                  |
| FBLN1    | fibulin 1 [Source:HGNC Symbol;Acc:HGNC:3600]                                                                                   |
| LGALS3   | galectin 3 [Source:HGNC Symbol;Acc:HGNC:6563]                                                                                  |
| FAM20C   | family with sequence similarity 20 member C [Source:HGNC Symbol;Acc:HGNC:22140]                                                |
| PLOD1    | procollagen-lysine,2-oxoglutarate 5-dioxygenase 1 [Source:HGNC Symbol;Acc:HGNC:9081]                                           |
| MAPK6    | mitogen-activated protein kinase 6 [Source:HGNC Symbol;Acc:HGNC:6879]                                                          |
| SERPIND1 | serpin family D member 1 [Source:HGNC Symbol;Acc:HGNC:4838]                                                                    |
| BCAN     | brevican [Source:HGNC Symbol;Acc:HGNC:23059]                                                                                   |
| DEFA1    | defensin alpha 1 [Source:HGNC Symbol;Acc:HGNC:2761]                                                                            |
| APCS     | amyloid P component, serum [Source:HGNC Symbol;Acc:HGNC:584]                                                                   |
| SPARC    | secreted protein acidic and cysteine rich [Source:HGNC Symbol;Acc:HGNC:11219]                                                  |
| SERPINA5 | serpin family A member 5 [Source:HGNC Symbol;Acc:HGNC:8723]                                                                    |
| LOX      | lysyl oxidase [Source:HGNC Symbol;Acc:HGNC:6664]                                                                               |
| NID1     | nidogen 1 [Source:HGNC Symbol;Acc:HGNC:7821]                                                                                   |
| LGALS8   | galectin 8 [Source:HGNC Symbol;Acc:HGNC:6569]                                                                                  |
| LGALS9   | galectin 9 [Source:HGNC Symbol;Acc:HGNC:6570]                                                                                  |
| MBL2     | mannose binding lectin 2 [Source:HGNC Symbol;Acc:HGNC:6922]                                                                    |
| SPP1     | secreted phosphoprotein 1 [Source:HGNC Symbol;Acc:HGNC:11255]                                                                  |
| LRP1     | LDL receptor related protein 1 [Source:HGNC Symbol;Acc:HGNC:6692]                                                              |
| ORM1     | orosomucoid 1 [Source:HGNC Symbol;Acc:HGNC:8498]                                                                               |
| C1QTNF9  | C1q and tumor necrosis factor related protein 9 [Source:HGNC Symbol;Acc:HGNC:28732]                                            |
| ALB      | albumin [Source:HGNC Symbol;Acc:HGNC:399]                                                                                      |
| APOA1    | apolipoprotein A1 [Source:HGNC Symbol;Acc:HGNC:600]                                                                            |
| COLEC12  | collectin subfamily member 12 [Source:HGNC Symbol;Acc:HGNC:16016]                                                              |
| APOA2    | apolipoprotein A2 [Source:HGNC Symbol;Acc:HGNC:601]                                                                            |
| ALDH2    | aldehyde dehydrogenase 2 family (mitochondrial) [Source:HGNC Symbol;Acc:HGNC:404]                                              |
| MATN2    | matrilin 2 [Source:HGNC Symbol;Acc:HGNC:6908]                                                                                  |
| PCOLCE   | procollagen C-endopeptidase enhancer [Source:HGNC Symbol;Acc:HGNC:8738]                                                        |

|          |                                                                                                        |
|----------|--------------------------------------------------------------------------------------------------------|
| APOC1    | apolipoprotein C1 [Source:HGNC Symbol;Acc:HGNC:607]                                                    |
| SERPINC1 | serpin family C member 1 [Source:HGNC Symbol;Acc:HGNC:775]                                             |
| PTX3     | pentraxin 3 [Source:HGNC Symbol;Acc:HGNC:9692]                                                         |
| OSM      | oncostatin M [Source:HGNC Symbol;Acc:HGNC:8506]                                                        |
| UBC      | ubiquitin C [Source:HGNC Symbol;Acc:HGNC:12468]                                                        |
| JUN      | Jun proto-oncogene, AP-1 transcription factor subunit [Source:HGNC Symbol;Acc:HGNC:6204]               |
| EGFR     | epidermal growth factor receptor [Source:HGNC Symbol;Acc:HGNC:3236]                                    |
| AUTS2    | autism susceptibility candidate 2 [Source:HGNC Symbol;Acc:HGNC:14262]                                  |
| XPO1     | exportin 1 [Source:HGNC Symbol;Acc:HGNC:12825]                                                         |
| CTNNB1   | catenin beta 1 [Source:HGNC Symbol;Acc:HGNC:2514]                                                      |
| PPP3CA   | protein phosphatase 3 catalytic subunit alpha [Source:HGNC Symbol;Acc:HGNC:9314]                       |
| SRPK1    | SRSF protein kinase 1 [Source:HGNC Symbol;Acc:HGNC:11305]                                              |
| KCNIP4   | potassium voltage-gated channel interacting protein 4 [Source:HGNC Symbol;Acc:HGNC:30083]              |
| PIK3R1   | phosphoinositide-3-kinase regulatory subunit 1 [Source:HGNC Symbol;Acc:HGNC:8979]                      |
| RDX      | radixin [Source:HGNC Symbol;Acc:HGNC:9944]                                                             |
| HNRNPD   | heterogeneous nuclear ribonucleoprotein D [Source:HGNC Symbol;Acc:HGNC:5036]                           |
| NTRK2    | neurotrophic receptor tyrosine kinase 2 [Source:HGNC Symbol;Acc:HGNC:8032]                             |
| MUC1     | mucin 1, cell surface associated [Source:HGNC Symbol;Acc:HGNC:7508]                                    |
| DLG2     | discs large MAGUK scaffold protein 2 [Source:HGNC Symbol;Acc:HGNC:2901]                                |
| CAND1    | cullin associated and neddylation dissociated 1 [Source:HGNC Symbol;Acc:HGNC:30688]                    |
| DAPK1    | death associated protein kinase 1 [Source:HGNC Symbol;Acc:HGNC:2674]                                   |
| RFC3     | replication factor C subunit 3 [Source:HGNC Symbol;Acc:HGNC:9971]                                      |
| DAB1     | DAB1, reelin adaptor protein [Source:HGNC Symbol;Acc:HGNC:2661]                                        |
| PIWIL1   | piwi like RNA-mediated gene silencing 1 [Source:HGNC Symbol;Acc:HGNC:9007]                             |
| PRL      | prolactin [Source:HGNC Symbol;Acc:HGNC:9445]                                                           |
| FOXP1    | forkhead box P1 [Source:HGNC Symbol;Acc:HGNC:3823]                                                     |
| UQCRC1   | ubiquinol-cytochrome c reductase, Rieske iron-sulfur polypeptide 1 [Source:HGNC Symbol;Acc:HGNC:12587] |
| PARK2    | parkin RBR E3 ubiquitin protein ligase [Source:HGNC Symbol;Acc:HGNC:8607]                              |
| TCF4     | transcription factor 4 [Source:HGNC Symbol;Acc:HGNC:11634]                                             |
| PBX1     | PBX homeobox 1 [Source:HGNC Symbol;Acc:HGNC:8632]                                                      |
| PRAMEF14 | PRAME family member 14 [Source:HGNC Symbol;Acc:HGNC:13576]                                             |
| PRAMEF1  | PRAME family member 1 [Source:HGNC Symbol;Acc:HGNC:28840]                                              |
| SPDYE3   | speedy/RINGO cell cycle regulator family member E3 [Source:HGNC Symbol;Acc:HGNC:35462]                 |
| SPDYE1   | speedy/RINGO cell cycle regulator family member E1 [Source:HGNC Symbol;Acc:HGNC:16408]                 |
| SPDYE2   | speedy/RINGO cell cycle regulator family member E2 [Source:HGNC Symbol;Acc:HGNC:33841]                 |

|          |                                                                                                                    |
|----------|--------------------------------------------------------------------------------------------------------------------|
| KRTAP5-2 | keratin associated protein 5-2 [Source:HGNC Symbol;Acc:HGNC:23597]                                                 |
| OR1J1    | olfactory receptor family 1 subfamily J member 1 [Source:HGNC Symbol;Acc:HGNC:8208]                                |
| OR8B2    | olfactory receptor family 8 subfamily B member 2 [Source:HGNC Symbol;Acc:HGNC:8471]                                |
| OR4D5    | olfactory receptor family 4 subfamily D member 5 [Source:HGNC Symbol;Acc:HGNC:14852]                               |
| OR4X1    | olfactory receptor family 4 subfamily X member 1 (gene/pseudogene) [Source:HGNC Symbol;Acc:HGNC:14854]             |
| OR5B3    | olfactory receptor family 5 subfamily B member 3 [Source:HGNC Symbol;Acc:HGNC:8324]                                |
| OR2Y1    | olfactory receptor family 2 subfamily Y member 1 [Source:HGNC Symbol;Acc:HGNC:14837]                               |
| KRTAP2-1 | keratin associated protein 2-1 [Source:HGNC Symbol;Acc:HGNC:16775]                                                 |
| OR5AN1   | olfactory receptor family 5 subfamily AN member 1 [Source:HGNC Symbol;Acc:HGNC:15255]                              |
| OR4Q3    | olfactory receptor family 4 subfamily Q member 3 [Source:HGNC Symbol;Acc:HGNC:15426]                               |
| OR10P1   | olfactory receptor family 10 subfamily P member 1 [Source:HGNC Symbol;Acc:HGNC:15378]                              |
| OR8B8    | olfactory receptor family 8 subfamily B member 8 [Source:HGNC Symbol;Acc:HGNC:8477]                                |
| OR51B4   | olfactory receptor family 51 subfamily B member 4 [Source:HGNC Symbol;Acc:HGNC:14708]                              |
| OR10J1   | olfactory receptor family 10 subfamily J member 1 [Source:HGNC Symbol;Acc:HGNC:8175]                               |
| CT45A5   | cancer/testis antigen family 45, member A5 [Source:HGNC Symbol;Acc:HGNC:33270]                                     |
| FRG2C    | FSHD region gene 2 family member C [Source:HGNC Symbol;Acc:HGNC:33626]                                             |
| FRG2B    | FSHD region gene 2 family member B [Source:HGNC Symbol;Acc:HGNC:33518]                                             |
| PLXDC2   | plexin domain containing 2 [Source:HGNC Symbol;Acc:HGNC:21013]                                                     |
| IQGAP2   | IQ motif containing GTPase activating protein 2 [Source:HGNC Symbol;Acc:HGNC:6111]                                 |
| BMP4     | bone morphogenetic protein 4 [Source:HGNC Symbol;Acc:HGNC:1071]                                                    |
| FMOD     | fibromodulin [Source:HGNC Symbol;Acc:HGNC:3774]                                                                    |
| DRD5     | dopamine receptor D5 [Source:HGNC Symbol;Acc:HGNC:3026]                                                            |
| CDH3     | cadherin 3 [Source:HGNC Symbol;Acc:HGNC:1762]                                                                      |
| UBB      | ubiquitin B [Source:HGNC Symbol;Acc:HGNC:12463]                                                                    |
| TCF7L1   | transcription factor 7 like 1 [Source:HGNC Symbol;Acc:HGNC:11640]                                                  |
| YWHAE    | tyrosine 3-monooxygenase/tryptophan 5-monooxygenase activation protein epsilon [Source:HGNC Symbol;Acc:HGNC:12851] |
| MAPK3    | mitogen-activated protein kinase 3 [Source:HGNC Symbol;Acc:HGNC:6877]                                              |
| NFKB1    | nuclear factor kappa B subunit 1 [Source:HGNC Symbol;Acc:HGNC:7794]                                                |
| PPARG    | peroxisome proliferator activated receptor gamma [Source:HGNC Symbol;Acc:HGNC:9236]                                |
| PRKCQ    | protein kinase C theta [Source:HGNC Symbol;Acc:HGNC:9410]                                                          |
| TMSB4X   | thymosin beta 4, X-linked [Source:HGNC Symbol;Acc:HGNC:11881]                                                      |
| CLIC1    | chloride intracellular channel 1 [Source:HGNC Symbol;Acc:HGNC:2062]                                                |



|          |                                                                                                                            |
|----------|----------------------------------------------------------------------------------------------------------------------------|
| VEGFC    | vascular endothelial growth factor C [Source:HGNC Symbol;Acc:HGNC:12682]                                                   |
| KRTAP4-1 | keratin associated protein 4-1 [Source:HGNC Symbol;Acc:HGNC:18907]                                                         |
| WT1      | Wilms tumor 1 [Source:HGNC Symbol;Acc:HGNC:12796]                                                                          |
| ENO2     | enolase 2 [Source:HGNC Symbol;Acc:HGNC:3353]                                                                               |
| RAC1     | ras-related C3 botulinum toxin substrate 1 (rho family, small GTP binding protein Rac1) [Source:HGNC Symbol;Acc:HGNC:9801] |
| RPE      | ribulose-5-phosphate-3-epimerase [Source:HGNC Symbol;Acc:HGNC:10293]                                                       |
| PLA2G2D  | phospholipase A2 group IID [Source:HGNC Symbol;Acc:HGNC:9033]                                                              |
| DEFA5    | defensin alpha 5 [Source:HGNC Symbol;Acc:HGNC:2764]                                                                        |
| UVRAG    | UV radiation resistance associated [Source:HGNC Symbol;Acc:HGNC:12640]                                                     |
| ADCY6    | adenylate cyclase 6 [Source:HGNC Symbol;Acc:HGNC:237]                                                                      |
| UQCRH    | ubiquinol-cytochrome c reductase hinge protein [Source:HGNC Symbol;Acc:HGNC:12590]                                         |
| ITPKC    | inositol-trisphosphate 3-kinase C [Source:HGNC Symbol;Acc:HGNC:14897]                                                      |
| FOXF2    | forkhead box F2 [Source:HGNC Symbol;Acc:HGNC:3810]                                                                         |
| CLDN10   | claudin 10 [Source:HGNC Symbol;Acc:HGNC:2033]                                                                              |
| TUBA1A   | tubulin alpha 1a [Source:HGNC Symbol;Acc:HGNC:20766]                                                                       |
| EDAR     | ectodysplasin A receptor [Source:HGNC Symbol;Acc:HGNC:2895]                                                                |
| PLD2     | phospholipase D2 [Source:HGNC Symbol;Acc:HGNC:9068]                                                                        |
| ATP12A   | ATPase H <sup>+</sup> /K <sup>+</sup> transporting non-gastric alpha2 subunit [Source:HGNC Symbol;Acc:HGNC:13816]          |
| TINAGL1  | tubulointerstitial nephritis antigen like 1 [Source:HGNC Symbol;Acc:HGNC:19168]                                            |
| CLDN34   | claudin 34 [Source:HGNC Symbol;Acc:HGNC:51259]                                                                             |

| Supplementary Table S9: The top genes were selected from various centralities. |                |                    |                   |                       |                          |
|--------------------------------------------------------------------------------|----------------|--------------------|-------------------|-----------------------|--------------------------|
| Degree unDir                                                                   | Bridging unDir | Closeness unDir    | EigenVector unDir | Stress unDir          | TopologicalCoefficient   |
| FN1                                                                            | SPDYE2         | FRG2B              | FN1               | UBC                   | SPDYE3                   |
| COL1A2                                                                         | DEFA1          | FRG2C              | SERPING1          | FN1                   | SPDYE1                   |
| COL4A1                                                                         | PITX3          | FN1                | COL18A1           | HABP2                 | DEFA1B                   |
| PLG                                                                            | DEFA5          | SERPING1           | CTSK              | DAB1                  | PRAMEF14                 |
| COL1A1                                                                         | KRTAP5-2       | UBC                | C1S               | MUC1                  | C4B_2                    |
| Betweenness unDir                                                              | Centroid unDir | Eccentricity unDir | Radiality unDir   | ClusteringCoefficient | NeighborhoodConnectivity |
| UBC                                                                            | CLDN34         | FRG2B              | FN1               | PRAMEF14              | BMP1                     |
| FN1                                                                            | FRG2B          | FRG2C              | SERPING1          | DEFA1B                | P3H3                     |
| SPDYE2                                                                         | FRG2C          |                    | COL1A2            | SPDYE3                | PDGFA                    |
| HABP2                                                                          |                |                    | UBC               | SPDYE1                | LUM                      |
| MUC1                                                                           |                |                    | CTSK              | C4B_2                 | COL14A1                  |

**Supplementary Table S10: The final gene list that contained 31 essential genes.**

|          |                                                                                         |
|----------|-----------------------------------------------------------------------------------------|
| FN1      | fibronectin 1 [Source:HGNC Symbol;Acc:HGNC:3778]                                        |
| COL1A2   | collagen type I alpha 2 chain [Source:HGNC Symbol;Acc:HGNC:2198]                        |
| COL4A1   | collagen type IV alpha 1 chain [Source:HGNC Symbol;Acc:HGNC:2202]                       |
| PLG      | plasminogen [Source:HGNC Symbol;Acc:HGNC:9071]                                          |
| COL1A1   | collagen type I alpha 1 [Source:HGNC Symbol;Acc:HGNC:2197]                              |
| UBC      | ubiquitin C [Source:HGNC Symbol;Acc:HGNC:12468]                                         |
| SPDYE2   | speedy/RINGO cell cycle regulator family member E2 [Source:HGNC Symbol;Acc:HGNC:33841]  |
| HABP2    | hyaluronan binding protein 2 [Source:HGNC Symbol;Acc:HGNC:4798]                         |
| MUC1     | mucin 1, cell surface associated [Source:HGNC Symbol;Acc:HGNC:7508]                     |
| DEFA1    | defensin alpha 1 [Source:HGNC Symbol;Acc:HGNC:2761]                                     |
| PITX3    | paired like homeodomain 3 [Source:HGNC Symbol;Acc:HGNC:9006]                            |
| DEFA5    | defensin alpha 5 [Source:HGNC Symbol;Acc:HGNC:2764]                                     |
| KRTAP5-2 | keratin associated protein 5-2 [Source:HGNC Symbol;Acc:HGNC:23597]                      |
| CLDN34   | claudin 34 [Source:HGNC Symbol;Acc:HGNC:51259]                                          |
| FRG2B    | FSHD region gene 2 family member B [Source:HGNC Symbol;Acc:HGNC:33518]                  |
| FRG2C    | FSHD region gene 2 family member C [Source:HGNC Symbol;Acc:HGNC:33626]                  |
| SERPING1 | serpin family G member 1 [Source:HGNC Symbol;Acc:HGNC:1228]                             |
| COL18A1  | collagen type XVIII alpha 1 chain [Source:HGNC Symbol;Acc:HGNC:2195]                    |
| CTSK     | cathepsin K [Source:HGNC Symbol;Acc:HGNC:2536]                                          |
| C1S      | complement component 1, s subcomponent [Source:HGNC Symbol;Acc:HGNC:1247]               |
| DAB1     | DAB1, reelin adaptor protein [Source:HGNC Symbol;Acc:HGNC:2661]                         |
| PRAMEF14 | PRAME family member 14 [Source:HGNC Symbol;Acc:HGNC:13576]                              |
| DEFA1B   | defensin alpha 1B [Source:HGNC Symbol;Acc:HGNC:33596]                                   |
| SPDYE3   | speedy/RINGO cell cycle regulator family member E3 [Source:HGNC Symbol;Acc:HGNC:35462]  |
| SPDYE1   | speedy/RINGO cell cycle regulator family member E1 [Source:HGNC Symbol;Acc:HGNC:16408]  |
| C4B_2    | complement component 4B (Chido blood group), copy 2 [Source:HGNC Symbol;Acc:HGNC:42398] |
| BMP1     | bone morphogenetic protein 1 [Source:HGNC Symbol;Acc:HGNC:1067]                         |
| P3H3     | prolyl 3-hydroxylase 3 [Source:HGNC Symbol;Acc:HGNC:19318]                              |
| PDGFA    | platelet derived growth factor subunit A [Source:HGNC Symbol;Acc:HGNC:8799]             |
| LUM      | lumican [Source:HGNC Symbol;Acc:HGNC:6724]                                              |
| COL14A1  | collagen type XIV alpha 1 chain [Source:HGNC Symbol;Acc:HGNC:2191]                      |

| Supplementary Table S11: The final nAMD-related SNPs |             |             |
|------------------------------------------------------|-------------|-------------|
| rs10490924/T                                         | rs2070296   | rs243865    |
| rs10737680/A                                         | rs4910623   | rs2287074   |
| rs429608/G                                           | rs12366035  | rs3918241   |
| rs2230199/C                                          | rs55732851  | rs3918242   |
| rs5749482/G                                          | rs1800775   | rs4810482   |
| rs4420638/A                                          | rs12603486  | rs17576     |
| rs1864163/G                                          | rs13900     | rs17577     |
| rs943080/T                                           | rs323085    | rs1999930   |
| rs13278062/T                                         | rs7412      | rs493258    |
| rs13081855/T                                         | rs148553336 | rs11755724  |
| rs8017304/A                                          | rs187328863 | rs509859    |
| rs4698775/G                                          | rs61818925  | rs12637095  |
| rs920915/C                                           | rs35292876  | rs13095226  |
| rs334353/T                                           | rs191281603 | rs3748391   |
| rs8135665/T                                          | rs141853578 | rs3764261   |
| rs3130783/A                                          | rs570618    | rs12678919  |
| rs6795735/T                                          | rs10922109  | rs3025033   |
| rs3812111/T                                          | rs62247658  | rs1570360A  |
| rs9542236/C                                          | rs943080    | rs699947A   |
| rs10801555                                           | rs2043085   | rs3025033G  |
| 10:124213143:CAA:C                                   | rs11884770  | rs2146323A  |
| rs11120691                                           | rs114092250 | rs1048661   |
| rs259842                                             | rs7803454   | rs1049331   |
| rs2011092                                            | rs1142      | rs2293870   |
| rs1005819                                            | rs12357257  | rs9973159   |
| rs17421410                                           | rs3138141   | rs200437673 |
| rs6899205                                            | rs61941274  | rs151214675 |
| rs7896471                                            | rs72802342  | rs140250387 |
| rs1926564                                            | rs11080055  | rs115333865 |
| rs1378940                                            | rs6565597   | rs570523689 |
| rs3825991                                            | rs67538026  | rs1329424   |
| rs2232613                                            | rs3750846   | rs13278062  |
| rs7405453                                            | rs62358361  | rs17073641  |
| rs138650617                                          | rs116503776 | rs10490924  |
| rs7678123                                            | rs9564692   | rs800292    |
| rs10036789                                           | rs429358    | rs1329428   |
| rs7744813                                            | rs8135665   | rs1883025   |
| rs9667489                                            | rs10033900  | rs3025039   |
| rs12570944                                           | rs4151667   | rs3025000   |
| rs2738265                                            | rs140647181 | rs10158937  |

|                     |              |             |
|---------------------|--------------|-------------|
| rs62181740          | rs5754227    | rs12138564  |
| rs10887262          | rs5817082    | rs3753394   |
| rs12950511          | rs2230199    | rs1065489   |
| rs113941606         | rs2284665    | rs17793056  |
| 2:146913702:CCTCT:C | rs147859257  | rs6828477   |
| rs36090025          | rs34882957   | rs4576072   |
| rs13118211          | rs641153     | rs2071559   |
| 1:164194417:TA:T    | rs17231506   | rs4073      |
| rs9330814           | rs1626340    | rs699946    |
| rs112115087         | rs61985136   | rs699947    |
| rs10824539          | rs71507014   | rs2069845   |
| rs41393947          | rs10781182   | rs25681     |
| rs12193446          | rs201459901  | rs181705462 |
| rs3138142           | rs79037040   | rs144629244 |
| rs7184522           | rs2740488    | rs114254831 |
| rs113721756         | rs142450006  | rs704       |
| rs111260777         | rs429608     | rs760070    |
| rs117468955         | rs1061170    | rs10922153  |
| rs4790395           | rs11080055   | rs3812111   |
| rs117115124         | rs1706902    | rs572515    |
| rs78606172          | rs117886541  | rs10737680  |
| rs200404865         | rs12520223   | rs7690921   |
| rs61820755          | rs78996920   | rs522162    |
| rs149369377         | rs150308036  | rs174547    |
| rs4085749           | rs8064132    | rs471364    |
| rs70620             | rs73036519   | rs2967605   |
| rs12047098          | rs1837253    | rs4939883   |
| rs72732232          | rs848        | rs2338104   |
| rs79351096          | rs911263     | rs964184    |
| rs16840522          | rs6677089    | rs7679      |
| rs34538561          | rs226251     | rs1800961   |
| rs11711512          | rs143255652  | rs4846914   |
| rs7439493           | rs143606602  | rs2736911   |
| rs1017242313        | rs4988183    | rs577360216 |
| rs752163277         | rs374945368  | rs6075340   |
| rs587779635         | rs1358927744 | rs4702      |
| rs1536304           | rs561508452  | rs2043085   |
| rs2414577           | rs116216433  | rs4243218   |
| rs8067305           | rs760342906  | rs5756908   |
| rs34559944          | rs34811207   | rs7398705   |
| rs7289865           | rs1555106201 | rs241777    |

|             |              |            |
|-------------|--------------|------------|
| rs79069165  | rs59690758   | rs157580   |
| rs74320127  | rs669953     | rs2070780  |
| rs56072732  | rs10740759   | rs6945359  |
| rs58978565  | rs56366109   | rs35064805 |
| rs28368872  | rs1733807    | rs4790874  |
| rs121913059 | rs12145913   | rs8076897  |
| rs10468017  | rs55722898   | rs16851585 |
| rs547154    | rs375015898  | rs1967689  |
| rs11200638  | rs1375561443 | rs6721654  |
| rs1410996   | rs61251108   | rs17586843 |
| rs1410966   | rs201405032  | rs7750345  |
| rs915370426 | rs6707761    | rs2049622  |
| rs1047286   | rs865775509  | rs11986011 |
| rs117793540 | rs77968014   | rs6480975  |
| rs2230210   | rs11402250   | rs3793917  |
| rs2230205   | rs12019136   | rs4293143  |
| rs2250656   | rs67538023   | rs621313   |
| rs9332739   | rs9708919    | rs9646096  |
| rs541862    | rs3750864    | rs10406174 |
| rs3826945   | rs4351242    | rs6857     |
| rs713685    | rs17855739   | rs2075650  |
| rs743751    | rs204993     | rs380390   |
| rs5749482   | rs8017304    | rs1713985  |
| rs9621532   | rs10422209   | rs2070895  |
| rs8179090   | rs9380272    |            |

**Supplementary Table S12: The final nAMD-related metabolites**

|                                              |                                     |                                    |
|----------------------------------------------|-------------------------------------|------------------------------------|
| L-Alanine                                    | Urea                                | 3-Hydroxybutyric acid              |
| L-Arginine                                   | Acetoacetic acid                    | D-Glucose                          |
| L-Aspartic acid                              | Dimethyl sulfone                    | Wax ester                          |
| Glycine                                      | N-Acetyl-L-alanine                  | Glutathione                        |
| L-Histidine                                  | N1-Methyl-2-pyridone-5-carboxamide  | Dopaquinone                        |
| L-Isoleucine                                 | Isomaltose                          | Phytosphingosine                   |
| L-Leucine                                    | Hydrocortisone                      | Zinc                               |
| L-Lysine                                     | Biliverdin                          | Calcium                            |
| L-Methionine                                 | Adenosine                           | Iron                               |
| L-Phenylalanine                              | DG(14:0/14:0/0:0)                   | Prostaglandin G2                   |
| L-Tyrosine                                   | 1-Lyso-2-arachidonoyl-phosphatidate | Arachidonic acid                   |
| L-Valine                                     | 9-Hexadecenoylcarnitine             | L-Serine                           |
| Glycerophosphocholine                        | Heptadecanoyl carnitine             | L-Proline                          |
| 1-Acyl-sn-glycerol 3-phosphate               | 11Z-Octadecenylcarnitine            | Docosahexaenoic acid               |
| LysoPC(0:0/18:0)                             | Stearoylcarnitine                   | L-Cystine                          |
| 2-Acetyl-1-alkyl-sn-glycero-3-phosphocholine | N-Ornithyl-L-taurine                | N-Acetyl-L-phenylalanine           |
| Phosphatidylserine                           | Serotonin                           | L-Cysteine                         |
| SM(d18:1/18:0)                               | N-Acetyl-L-methionine               | N-acetyltryptophan                 |
| Glycocholic acid                             | Hypotaurine                         | Deoxycholic acid glycine conjugate |
| Deoxycholic acid glycine conjugate           | N-Acetylaspargine                   | Cholesterol                        |
| Glycoursodeoxycholic acid                    | S-Adenosylhomocysteine              | Isopentyl beta-D-glucoside         |
| 12-HETE                                      | Maltotriose                         | LysoPC(P-18:0)                     |
| L-Lactic acid                                | Maltose                             | LysoPC(P-18:1(9Z))                 |
| Acetic acid                                  | Guanine                             | LysoPC(16:1(9Z))                   |
| L-Carnitine                                  | Isoleucyl-Glycine                   | Darunavir                          |
| Creatine                                     | Lipoprotein                         | Bepidil                            |
| Cytidine                                     | L-Glutamine                         | Corchoroside A                     |
| Hypoxanthine                                 | p-Hydroxyphenylacetic acid          | Oleoylcarnitine                    |
| Inosine                                      | Formic acid                         | Glycerophosphocholine              |
| Adenine                                      | Sucrose                             | Sphingosine                        |
| Betaine                                      | cis-Aconitic acid                   | L-Cysteine                         |
| Niacinamide                                  | Valerylcarnitine                    | L-Cystine                          |
| L-Palmitoylcarnitine                         | Citric acid                         | LysoPC(0:0/18:0)                   |
| Taurine                                      | 4-Trimethylammoniobutanoic acid     | Glycerol                           |
| Cytidine monophosphate                       | Mesaconic acid                      | L-Carnitine                        |
| Pyruvic acid                                 | Streptomycin                        | 17-HDoHE                           |
| L-Glutamic acid                              | 3-Deoxyarabinoheptonic acid         | Sphinganine                        |
| L-Tryptophan                                 | Oleic acid                          | Purine                             |
| Taurine                                      |                                     |                                    |

| Supplementary Table S13: A list of 30 critical SNPs was created by merging results |             |            |
|------------------------------------------------------------------------------------|-------------|------------|
| rs17576                                                                            | rs174547    | rs3918242  |
| rs1061170                                                                          | rs2071559   | rs800292   |
| rs699947                                                                           | rs1800961   | rs3025039  |
| rs429358                                                                           | rs6857      | rs7412     |
| rs2043085                                                                          | rs1837253   | rs2070895  |
| rs3764261                                                                          | rs114254831 | rs1800775  |
| rs4073                                                                             | rs116503776 | rs17577    |
| rs243865                                                                           | rs2740488   | rs1065489  |
| rs964184                                                                           | rs12678919  | rs10468017 |
| rs2075650                                                                          | rs7679      | rs17231506 |

| Supplementary Table S14: A total of 33 crucial pathways were chosen based on FDR <0.05 |          |                                                      |          |
|----------------------------------------------------------------------------------------|----------|------------------------------------------------------|----------|
| Pathway                                                                                | FDR      | pathway                                              | FDR      |
| ABC transporters                                                                       | 4.34E-27 | Purine metabolism                                    | 0.010746 |
| Protein digestion and absorption                                                       | 5.17E-26 | Pantothenate and CoA biosynthesis                    | 0.010746 |
| Central carbon metabolism in cancer                                                    | 5.26E-20 | Thiamine metabolism                                  | 0.010746 |
| Aminoacyl-tRNA biosynthesis                                                            | 3.07E-16 | Arginine and proline metabolism                      | 0.01168  |
| Mineral absorption                                                                     | 7.81E-13 | Staphylococcus aureus infection                      | 0.021438 |
| Glyoxylate and dicarboxylate metabolism                                                | 2.62E-07 | Gap junction                                         | 0.021454 |
| Taurine and hypotaurine metabolism                                                     | 4.19E-07 | Neuroactive ligand-receptor interaction              | 0.023787 |
| Cysteine and methionine metabolism                                                     | 1.68E-05 | Primary bile acid biosynthesis                       | 0.027448 |
| Glycine, serine and threonine metabolism                                               | 3.15E-05 | AGE-RAGE signaling pathway in diabetic complications | 0.029015 |
| Alanine, aspartate and glutamate metabolism                                            | 0.000523 | Tyrosine metabolism                                  | 0.032855 |
| Ferroptosis                                                                            | 0.000803 | Butanoate metabolism                                 | 0.032855 |
| Sulfur metabolism                                                                      | 0.000803 | Pyruvate metabolism                                  | 0.032855 |
| Arginine biosynthesis                                                                  | 0.000831 | Taste transduction                                   | 0.032961 |
| Amoebiasis                                                                             | 0.001224 | Nitrogen metabolism                                  | 0.036419 |
| Valine, leucine and isoleucine biosynthesis                                            | 0.001604 | Carbohydrate digestion and absorption                | 0.036419 |
| Sphingolipid metabolism                                                                | 0.007217 | Phenylalanine, tyrosine and tryptophan biosynthesis  | 0.046353 |
| Phenylalanine metabolism                                                               | 0.009279 |                                                      |          |



**Supplementary Table S17: the results of two distinct networks were reconstructed to evaluate the multiple centralities of every metabolite.**

|                                              | Metabolite-metabolite interaction network |             | Metabolite-gene-disease interaction network |             |
|----------------------------------------------|-------------------------------------------|-------------|---------------------------------------------|-------------|
|                                              | Degree                                    | Betweenness | Degree                                      | Betweenness |
| Maltotriose                                  | 19                                        | 984.14      | nd                                          | nd          |
| L-Glutamic acid                              | 306                                       | 68219.62    | 5                                           | 413.99      |
| Pyruvic acid                                 | 249                                       | 42673.65    | 15                                          | 845.51      |
| L-Tryptophan                                 | 95                                        | 8225.5      | 6                                           | 1044.12     |
| Calcium                                      | nd                                        | nd          | 18                                          | 3031.95     |
| Citric acid                                  | 144                                       | 13038.04    | 10                                          | 1305.28     |
| L-Alanine                                    | 126                                       | 8628.74     | 12                                          | 893.03      |
| L-Serine                                     | 118                                       | 6488.68     | 7                                           | 430.09      |
| Betaine                                      | 50                                        | 2091.47     | 5                                           | 459.91      |
| Dimethyl sulfone                             | 7                                         | 15.04       | nd                                          | nd          |
| L-Arginine                                   | 119                                       | 10059.28    | 16                                          | 1398.93     |
| Sphinganine                                  | 22                                        | 1201.34     | nd                                          | nd          |
| L-Glutamine                                  | 119                                       | 5780.66     | 6                                           | 456.29      |
| L-Tyrosine                                   | 80                                        | 5265.51     | 5                                           | 359.72      |
| 1-Acyl-sn-glycerol 3-phosphate               | nd                                        | nd          | nd                                          | nd          |
| Cholesterol sulfate                          | 1                                         | 0           | 23                                          | 4525.31     |
| Acetoacetic acid                             | nd                                        | nd          | 7                                           | 615.17      |
| Formic acid                                  | nd                                        | nd          | 1                                           | 0           |
| Sucrose                                      | 57                                        | 4954.12     | 1                                           | 0           |
| L-Phenylalanine                              | 90                                        | 3770.24     | 6                                           | 872.92      |
| L-Cysteine                                   | 132                                       | 10977.63    | 5                                           | 768.43      |
| L-Aspartate-semialdehyde                     | 13                                        | 3.87        | nd                                          | nd          |
| Fe3+                                         | nd                                        | nd          | nd                                          | nd          |
| Formate                                      | nd                                        | nd          | nd                                          | nd          |
| Pyruvate                                     | nd                                        | nd          | nd                                          | nd          |
| L-Methionine                                 | 107                                       | 5789.4      | 10                                          | 1984.29     |
| Creatine                                     | 32                                        | 1294.85     | 5                                           | 668.71      |
| L-Cystine                                    | 2                                         | 0           | 7                                           | 393.36      |
| L-Lysine                                     | 129                                       | 10419.41    | 15                                          | 1406.1      |
| L-Isoleucine                                 | 64                                        | 755.32      | 7                                           | 443.17      |
| Phytosphingosine                             | 11                                        | 398.48      | nd                                          | nd          |
| N-Acetyl-L-phenylalanine                     | nd                                        | nd          | nd                                          | nd          |
| Adenosine                                    | 111                                       | 9108.39     | 3                                           | 267.53      |
| L-Valine                                     | 76                                        | 1550        | 8                                           | 656.72      |
| 2-Acetyl-1-alkyl-sn-glycero-3-phosphocholine | nd                                        | nd          | nd                                          | nd          |
| Glycine                                      | 156                                       | 16594.88    | 20                                          | 2469.18     |
| 4-Hydroxyphenylacetate                       | nd                                        | nd          | nd                                          | nd          |

|                            |     |          |    |         |
|----------------------------|-----|----------|----|---------|
| Acetoacetate               | nd  | nd       | nd | nd      |
| L-Leucine                  | 90  | 2991.38  | 8  | 762.72  |
| Acetate                    | nd  | nd       | nd | nd      |
| Zinc (II) ion              | nd  | nd       | 4  | 239.63  |
| cis-Aconitic acid          | 39  | 1424.21  | 3  | 119.06  |
| Hypotaurine                | 10  | 27.43    | nd | nd      |
| S-Adenosylhomocysteine     | 183 | 43943.55 | 2  | 47.9    |
| L-Aspartic acid            | 115 | 8786.02  | 3  | 126.28  |
| Glutathione                | 95  | 8058.05  | 4  | 818.93  |
| Acetic acid                | nd  | nd       | 3  | 120.52  |
| Arachidonic acid           | 73  | 12822.34 | 2  | 263.8   |
| Adenine                    | 96  | 9588.04  | nd | nd      |
| Urea                       | 49  | 4557.1   | 5  | 112.89  |
| Serotonin                  | 108 | 17274.62 | 4  | 593.14  |
| Cortisol                   | nd  | nd       | 23 | 6286.31 |
| Taurine                    | 49  | 3658.42  | 5  | 743     |
| 3R-hydroxy-butanoic acid   | nd  | nd       | nd | nd      |
| L-Lactic acid              | 32  | 1020.11  | 55 | 9526.37 |
| Sphingosine                | nd  | nd       | nd | nd      |
| p-Hydroxyphenylacetic acid | 9   | 36.63    | 3  | 334.45  |
| Inosine                    | 49  | 1656.88  | 3  | 283.06  |
| Glycocholic acid           | nd  | nd       | nd | nd      |
| SM(d18:1/18:0)             | 13  | 1096.7   | nd | nd      |
| Hypoxanthine               | 56  | 2240.9   | 5  | 1032.66 |
| Dopaquinone                | 6   | 17.92    | nd | nd      |
| L-Proline                  | 68  | 3215.12  | 11 | 1004.54 |
| L-Histidine                | 74  | 2692.98  | 7  | 460.73  |
| Guanine                    | 53  | 1765.56  | 1  | 0       |
| 2-Methylfumarate           | nd  | nd       | nd | nd      |
| 4-Trimethylammonibutanoate | nd  | nd       | nd | nd      |
| Cytidine                   | 43  | 2274.23  | 1  | 0       |
| Lipoprotein                | nd  | nd       | nd | nd      |
| Glycerol                   | 320 | 76408.57 | 6  | 1613.74 |

| Supplementary Table S18: the normalized results within the metabolite-metabolite interaction network (MMIN) |        |            |                     |             |                 |                     |
|-------------------------------------------------------------------------------------------------------------|--------|------------|---------------------|-------------|-----------------|---------------------|
| Metabolites                                                                                                 | Degree | MAX Degree | Normalized Weight 1 | Betweenness | MAX Betweenness | Normalized Weight 2 |
| Maltotriose                                                                                                 | 19     | 320        | 0.059375            | 984.14      | 76408.57        | 0.012879969         |
| L-Glutamic acid                                                                                             | 306    | 320        | 0.95625             | 68219.62    | 76408.57        | 0.892826812         |
| Pyruvic acid                                                                                                | 249    | 320        | 0.778125            | 42673.65    | 76408.57        | 0.558492981         |
| L-Tryptophan                                                                                                | 95     | 320        | 0.296875            | 8225.5      | 76408.57        | 0.107651537         |
| Citric acid                                                                                                 | 144    | 320        | 0.45                | 13038.04    | 76408.57        | 0.170635833         |
| L-Alanine                                                                                                   | 126    | 320        | 0.39375             | 8628.74     | 76408.57        | 0.112928955         |
| L-Serine                                                                                                    | 118    | 320        | 0.36875             | 6488.68     | 76408.57        | 0.084920841         |
| Betaine                                                                                                     | 50     | 320        | 0.15625             | 2091.47     | 76408.57        | 0.027372191         |
| Dimethyl sulfone                                                                                            | 7      | 320        | 0.021875            | 15.04       | 76408.57        | 0.000196837         |
| L-Arginine                                                                                                  | 119    | 320        | 0.371875            | 10059.28    | 76408.57        | 0.131651201         |
| Sphinganine                                                                                                 | 22     | 320        | 0.06875             | 1201.34     | 76408.57        | 0.015722582         |
| L-Glutamine                                                                                                 | 119    | 320        | 0.371875            | 5780.66     | 76408.57        | 0.075654603         |
| L-Tyrosine                                                                                                  | 80     | 320        | 0.25                | 5265.51     | 76408.57        | 0.068912558         |
| Cholesterol sulfate                                                                                         | 1      | 320        | 0.003125            | 0           | 76408.57        | 0                   |
| Sucrose                                                                                                     | 57     | 320        | 0.178125            | 4954.12     | 76408.57        | 0.06483723          |
| L-Phenylalanine                                                                                             | 90     | 320        | 0.28125             | 3770.24     | 76408.57        | 0.049343156         |
| L-Cysteine                                                                                                  | 132    | 320        | 0.4125              | 10977.63    | 76408.57        | 0.143670141         |
| L-Aspartate-semialdehyde                                                                                    | 13     | 320        | 0.040625            | 3.87        | 76408.57        | 5.06488E-05         |
| L-Methionine                                                                                                | 107    | 320        | 0.334375            | 5789.4      | 76408.57        | 0.075768988         |
| Creatine                                                                                                    | 32     | 320        | 0.1                 | 1294.85     | 76408.57        | 0.016946398         |
| L-Cystine                                                                                                   | 2      | 320        | 0.00625             | 0           | 76408.57        | 0                   |
| L-Lysine                                                                                                    | 129    | 320        | 0.403125            | 10419.41    | 76408.57        | 0.136364416         |
| L-Isoleucine                                                                                                | 64     | 320        | 0.2                 | 755.32      | 76408.57        | 0.009885279         |
| Phytosphingosine                                                                                            | 11     | 320        | 0.034375            | 398.48      | 76408.57        | 0.005215122         |
| Adenosine                                                                                                   | 111    | 320        | 0.346875            | 9108.39     | 76408.57        | 0.119206393         |
| L-Valine                                                                                                    | 76     | 320        | 0.2375              | 1550        | 76408.57        | 0.020285683         |
| Glycine                                                                                                     | 156    | 320        | 0.4875              | 16594.88    | 76408.57        | 0.217186109         |
| L-Leucine                                                                                                   | 90     | 320        | 0.28125             | 2991.38     | 76408.57        | 0.039149797         |
| cis-Aconitic acid                                                                                           | 39     | 320        | 0.121875            | 1424.21     | 76408.57        | 0.018639401         |
| Hypotaurine                                                                                                 | 10     | 320        | 0.03125             | 27.43       | 76408.57        | 0.000358991         |
| S-Adenosylhomocysteine                                                                                      | 183    | 320        | 0.571875            | 43943.55    | 76408.57        | 0.575112844         |
| L-Aspartic acid                                                                                             | 115    | 320        | 0.359375            | 8786.02     | 76408.57        | 0.114987363         |
| Glutathione                                                                                                 | 95     | 320        | 0.296875            | 8058.05     | 76408.57        | 0.105460029         |
| Arachidonic acid                                                                                            | 73     | 320        | 0.228125            | 12822.34    | 76408.57        | 0.167812851         |
| Adenine                                                                                                     | 96     | 320        | 0.3                 | 9588.04     | 76408.57        | 0.12548383          |
| Urea                                                                                                        | 49     | 320        | 0.153125            | 4557.1      | 76408.57        | 0.059641216         |
| Serotonin                                                                                                   | 108    | 320        | 0.3375              | 17274.62    | 76408.57        | 0.226082231         |
| Taurine                                                                                                     | 49     | 320        | 0.153125            | 3658.42     | 76408.57        | 0.047879708         |
| L-Lactic acid                                                                                               | 32     | 320        | 0.1                 | 1020.11     | 76408.57        | 0.013350728         |

|                            |     |     |          |          |          |             |
|----------------------------|-----|-----|----------|----------|----------|-------------|
| p-Hydroxyphenylacetic acid | 9   | 320 | 0.028125 | 36.63    | 76408.57 | 0.000479396 |
| Inosine                    | 49  | 320 | 0.153125 | 1656.88  | 76408.57 | 0.021684479 |
| SM(d18:1/18:0)             | 13  | 320 | 0.040625 | 1096.7   | 76408.57 | 0.014353102 |
| Hypoxanthine               | 56  | 320 | 0.175    | 2240.9   | 76408.57 | 0.029327862 |
| Dopaquinone                | 6   | 320 | 0.01875  | 17.92    | 76408.57 | 0.000234529 |
| L-Proline                  | 68  | 320 | 0.2125   | 3215.12  | 76408.57 | 0.042078003 |
| L-Histidine                | 74  | 320 | 0.23125  | 2692.98  | 76408.57 | 0.035244476 |
| Guanine                    | 53  | 320 | 0.165625 | 1765.56  | 76408.57 | 0.023106832 |
| Cytidine                   | 43  | 320 | 0.134375 | 2274.23  | 76408.57 | 0.02976407  |
| Glycerol                   | 320 | 320 | 1        | 76408.57 | 76408.57 | 1           |

| Supplementary Table S19: the normalized results within the Metabolite-gene-disease interaction network (MGDIN) |        |            |                     |             |                 |                     |
|----------------------------------------------------------------------------------------------------------------|--------|------------|---------------------|-------------|-----------------|---------------------|
|                                                                                                                | Degree | MAX Degree | Normalized Weight 3 | Betweenness | MAX Betweenness | Normalized Weight 4 |
| L-Glutamic acid                                                                                                | 5      | 55         | 0.090909091         | 413.99      | 9526.37         | 0.043457267         |
| Pyruvic acid                                                                                                   | 15     | 55         | 0.272727273         | 845.51      | 9526.37         | 0.088754688         |
| L-Tryptophan                                                                                                   | 6      | 55         | 0.109090909         | 1044.12     | 9526.37         | 0.109603133         |
| Calcium                                                                                                        | 18     | 55         | 0.327272727         | 3031.95     | 9526.37         | 0.318269183         |
| Citric acid                                                                                                    | 10     | 55         | 0.181818182         | 1305.28     | 9526.37         | 0.137017563         |
| L-Alanine                                                                                                      | 12     | 55         | 0.218181818         | 893.03      | 9526.37         | 0.093742947         |
| L-Serine                                                                                                       | 7      | 55         | 0.127272727         | 430.09      | 9526.37         | 0.045147312         |
| Betaine                                                                                                        | 5      | 55         | 0.090909091         | 459.91      | 9526.37         | 0.048277571         |
| L-Arginine                                                                                                     | 16     | 55         | 0.290909091         | 1398.93     | 9526.37         | 0.14684817          |
| L-Glutamine                                                                                                    | 6      | 55         | 0.109090909         | 456.29      | 9526.37         | 0.047897573         |
| L-Tyrosine                                                                                                     | 5      | 55         | 0.090909091         | 359.72      | 9526.37         | 0.037760448         |
| Cholesterol sulfate                                                                                            | 23     | 55         | 0.418181818         | 4525.31     | 9526.37         | 0.475029838         |
| Acetoacetic acid                                                                                               | 7      | 55         | 0.127272727         | 615.17      | 9526.37         | 0.064575489         |
| Formic acid                                                                                                    | 1      | 55         | 0.018181818         | 0           | 9526.37         | 0                   |
| Sucrose                                                                                                        | 1      | 55         | 0.018181818         | 0           | 9526.37         | 0                   |
| L-Phenylalanine                                                                                                | 6      | 55         | 0.109090909         | 872.92      | 9526.37         | 0.091631965         |
| L-Cysteine                                                                                                     | 5      | 55         | 0.090909091         | 768.43      | 9526.37         | 0.080663464         |
| L-Methionine                                                                                                   | 10     | 55         | 0.181818182         | 1984.29     | 9526.37         | 0.20829445          |
| Creatine                                                                                                       | 5      | 55         | 0.090909091         | 668.71      | 9526.37         | 0.070195678         |
| L-Cystine                                                                                                      | 7      | 55         | 0.127272727         | 393.36      | 9526.37         | 0.041291699         |
| L-Lysine                                                                                                       | 15     | 55         | 0.272727273         | 1406.1      | 9526.37         | 0.147600818         |
| L-Isoleucine                                                                                                   | 7      | 55         | 0.127272727         | 443.17      | 9526.37         | 0.046520343         |
| Adenosine                                                                                                      | 3      | 55         | 0.054545455         | 267.53      | 9526.37         | 0.0280831           |
| L-Valine                                                                                                       | 8      | 55         | 0.145454545         | 656.72      | 9526.37         | 0.068937066         |
| Glycine                                                                                                        | 20     | 55         | 0.363636364         | 2469.18     | 9526.37         | 0.259194216         |
| L-Leucine                                                                                                      | 8      | 55         | 0.145454545         | 762.72      | 9526.37         | 0.080064075         |
| Zinc (II) ion                                                                                                  | 4      | 55         | 0.072727273         | 239.63      | 9526.37         | 0.025154387         |
| cis-Aconitic acid                                                                                              | 3      | 55         | 0.054545455         | 119.06      | 9526.37         | 0.01249794          |
| S-Adenosylhomocysteine                                                                                         | 2      | 55         | 0.036363636         | 47.9        | 9526.37         | 0.005028148         |
| L-Aspartic acid                                                                                                | 3      | 55         | 0.054545455         | 126.28      | 9526.37         | 0.013255836         |
| Glutathione                                                                                                    | 4      | 55         | 0.072727273         | 818.93      | 9526.37         | 0.085964538         |
| Acetic acid                                                                                                    | 3      | 55         | 0.054545455         | 120.52      | 9526.37         | 0.012651199         |
| Arachidonic acid                                                                                               | 2      | 55         | 0.036363636         | 263.8       | 9526.37         | 0.027691555         |
| Urea                                                                                                           | 5      | 55         | 0.090909091         | 112.89      | 9526.37         | 0.011850264         |
| Serotonin                                                                                                      | 4      | 55         | 0.072727273         | 593.14      | 9526.37         | 0.062262961         |
| Cortisol                                                                                                       | 23     | 55         | 0.418181818         | 6286.31     | 9526.37         | 0.65988514          |
| Taurine                                                                                                        | 5      | 55         | 0.090909091         | 743         | 9526.37         | 0.077994031         |
| L-Lactic acid                                                                                                  | 55     | 55         | 1                   | 9526.37     | 9526.37         | 1                   |

|                            |    |    |             |         |         |             |
|----------------------------|----|----|-------------|---------|---------|-------------|
| p-Hydroxyphenylacetic acid | 3  | 55 | 0.054545455 | 334.45  | 9526.37 | 0.035107811 |
| Inosine                    | 3  | 55 | 0.054545455 | 283.06  | 9526.37 | 0.029713312 |
| Hypoxanthine               | 5  | 55 | 0.090909091 | 1032.66 | 9526.37 | 0.108400157 |
| L-Proline                  | 11 | 55 | 0.2         | 1004.54 | 9526.37 | 0.10544835  |
| L-Histidine                | 7  | 55 | 0.127272727 | 460.73  | 9526.37 | 0.048363647 |
| Guanine                    | 1  | 55 | 0.018181818 | 0       | 9526.37 | 0           |
| Cytidine                   | 1  | 55 | 0.018181818 | 0       | 9526.37 | 0           |
| Glycerol                   | 6  | 55 | 0.109090909 | 1613.74 | 9526.37 | 0.169397158 |

| Supplementary Table S20: 256 rule bases were established and decisions were made on the consequences |                     |                     |                     |                |
|------------------------------------------------------------------------------------------------------|---------------------|---------------------|---------------------|----------------|
| Output                                                                                               |                     |                     |                     | Final Decision |
| Normalized Weight 1                                                                                  | Normalized Weight 2 | Normalized Weight 3 | Normalized Weight 4 |                |
| w                                                                                                    | w                   | w                   | w                   | w              |
| w                                                                                                    | w                   | w                   | m                   | w              |
| w                                                                                                    | w                   | w                   | g                   | m              |
| w                                                                                                    | w                   | w                   | e                   | m              |
| w                                                                                                    | w                   | m                   | w                   | w              |
| w                                                                                                    | w                   | m                   | m                   | m              |
| w                                                                                                    | w                   | m                   | g                   | g              |
| w                                                                                                    | w                   | m                   | e                   | g              |
| w                                                                                                    | w                   | g                   | w                   | m              |
| w                                                                                                    | w                   | g                   | m                   | g              |
| w                                                                                                    | w                   | g                   | g                   | g              |
| w                                                                                                    | w                   | g                   | e                   | g              |
| w                                                                                                    | w                   | e                   | w                   | m              |
| w                                                                                                    | w                   | e                   | m                   | g              |
| w                                                                                                    | w                   | e                   | g                   | g              |
| w                                                                                                    | w                   | e                   | e                   | e              |
| w                                                                                                    | m                   | w                   | w                   | w              |
| w                                                                                                    | m                   | w                   | m                   | w              |
| w                                                                                                    | m                   | w                   | g                   | m              |
| w                                                                                                    | m                   | w                   | e                   | m              |
| w                                                                                                    | m                   | m                   | w                   | w              |
| w                                                                                                    | m                   | m                   | m                   | m              |
| w                                                                                                    | m                   | m                   | g                   | g              |
| w                                                                                                    | m                   | m                   | e                   | g              |
| w                                                                                                    | m                   | g                   | w                   | m              |
| w                                                                                                    | m                   | g                   | m                   | m              |
| w                                                                                                    | m                   | g                   | g                   | g              |
| w                                                                                                    | m                   | g                   | e                   | g              |
| w                                                                                                    | m                   | e                   | w                   | m              |
| w                                                                                                    | m                   | e                   | m                   | g              |
| w                                                                                                    | m                   | e                   | g                   | g              |
| w                                                                                                    | m                   | e                   | e                   | e              |
| w                                                                                                    | g                   | w                   | w                   | w              |
| w                                                                                                    | g                   | w                   | m                   | m              |
| w                                                                                                    | g                   | w                   | g                   | g              |
| w                                                                                                    | g                   | w                   | e                   | m              |
| w                                                                                                    | g                   | m                   | w                   | m              |
| w                                                                                                    | g                   | m                   | m                   | m              |

|   |   |   |   |   |
|---|---|---|---|---|
| w | g | m | g | g |
| w | g | m | e | g |
| w | g | g | w | g |
| w | g | g | m | m |
| w | g | g | g | g |
| w | g | g | e | g |
| w | g | e | w | m |
| w | g | e | m | g |
| w | g | e | g | g |
| w | g | e | e | e |
| w | e | w | w | w |
| w | e | w | m | w |
| w | e | w | g | m |
| w | e | w | e | g |
| w | e | m | w | w |
| w | e | m | m | m |
| w | e | m | g | m |
| w | e | m | e | g |
| w | e | g | w | m |
| w | e | g | m | m |
| w | e | g | g | g |
| w | e | g | e | g |
| w | e | e | w | g |
| w | e | e | m | g |
| w | e | e | g | g |
| w | e | e | e | e |
| m | w | w | w | w |
| m | w | w | m | m |
| m | w | w | g | m |
| m | w | w | e | m |
| m | w | m | w | m |
| m | w | m | m | m |
| m | w | m | g | m |
| m | w | m | e | g |
| m | w | g | w | m |
| m | w | g | m | m |
| m | w | g | g | g |
| m | w | g | e | g |
| m | w | e | w | m |
| m | w | e | m | g |
| m | w | e | g | g |



|   |   |   |   |   |
|---|---|---|---|---|
| m | w | e | e | e |
| m | m | w | w | w |
| m | m | w | m | m |
| m | m | w | g | m |
| m | m | w | e | m |
| m | m | m | w | m |
| m | m | m | m | m |
| m | m | m | g | m |
| m | m | m | e | g |
| m | m | g | w | m |
| m | m | g | m | g |
| m | m | g | g | g |
| m | m | g | e | g |
| m | m | e | w | m |
| m | m | e | m | g |
| m | m | e | g | g |
| m | m | e | e | e |
| m | g | w | w | w |
| m | g | w | m | m |
| m | g | w | g | g |
| m | g | w | e | m |
| m | g | m | w | m |
| m | g | m | m | m |
| m | g | m | g | g |
| m | g | m | e | g |
| m | g | g | w | m |
| m | g | g | m | g |
| m | g | g | g | g |
| m | g | g | e | g |
| m | g | e | w | m |
| m | g | e | m | g |
| m | g | e | g | g |
| m | g | e | e | e |
| m | e | w | w | w |
| m | e | w | m | m |
| m | e | w | g | m |
| m | e | w | e | g |
| m | e | m | w | m |
| m | e | m | m | m |
| m | e | m | g | g |
| m | e | m | e | g |

|   |   |   |   |   |
|---|---|---|---|---|
| m | e | g | w | m |
| m | e | g | m | m |
| m | e | g | g | g |
| m | e | g | e | e |
| m | e | e | w | g |
| m | e | e | m | g |
| m | e | e | g | e |
| m | e | e | e | e |
| g | w | w | w | w |
| g | w | w | m | w |
| g | w | w | g | w |
| g | w | w | e | m |
| g | w | m | w | w |
| g | w | m | m | m |
| g | w | m | g | m |
| g | w | m | e | g |
| g | w | g | w | m |
| g | w | g | m | g |
| g | w | g | g | g |
| g | w | g | e | g |
| g | w | e | w | m |
| g | w | e | m | g |
| g | w | e | g | g |
| g | w | e | e | e |
| g | m | w | w | w |
| g | m | w | m | w |
| g | m | w | g | w |
| g | m | w | e | m |
| g | m | m | w | m |
| g | m | m | m | m |
| g | m | m | g | m |
| g | m | m | e | g |
| g | m | g | w | m |
| g | m | g | m | m |
| g | m | g | g | g |
| g | m | g | e | g |
| g | m | e | w | m |
| g | m | e | m | g |
| g | m | e | g | g |
| g | m | e | e | e |
| g | g | w | w | w |

|   |   |   |   |   |
|---|---|---|---|---|
| g | g | w | m | w |
| g | g | w | g | m |
| g | g | w | e | m |
| g | g | m | w | m |
| g | g | m | m | m |
| g | g | m | g | g |
| g | g | m | e | g |
| g | g | g | w | g |
| g | g | g | m | g |
| g | g | g | g | g |
| g | g | g | e | g |
| g | g | e | w | m |
| g | g | e | m | g |
| g | g | e | g | g |
| g | g | e | e | e |
| g | e | w | w | w |
| g | e | w | m | m |
| g | e | w | g | m |
| g | e | w | e | g |
| g | e | m | w | m |
| g | e | m | m | m |
| g | e | m | g | m |
| g | e | m | e | g |
| g | e | g | w | m |
| g | e | g | m | m |
| g | e | g | g | g |
| g | e | g | e | e |
| g | e | e | w | g |
| g | e | e | m | g |
| g | e | e | g | e |
| g | e | e | e | e |
| e | w | w | w | w |
| e | w | w | m | w |
| e | w | w | g | m |
| e | w | w | e | m |
| e | w | m | w | w |
| e | w | m | m | m |
| e | w | m | g | m |
| e | w | m | e | g |
| e | w | g | w | m |
| e | w | g | m | m |

|   |   |   |   |   |
|---|---|---|---|---|
| e | w | g | g | g |
| e | w | g | e | g |
| e | w | e | w | m |
| e | w | e | m | g |
| e | w | e | g | g |
| e | w | e | e | e |
| e | m | w | w | w |
| e | m | w | m | w |
| e | m | w | g | w |
| e | m | w | e | m |
| e | m | m | w | m |
| e | m | m | m | m |
| e | m | m | g | m |
| e | m | m | e | g |
| e | m | g | w | m |
| e | m | g | m | m |
| e | m | g | g | g |
| e | m | g | e | g |
| e | m | e | w | g |
| e | m | e | m | g |
| e | m | e | g | g |
| e | m | e | e | e |
| e | g | w | w | w |
| e | g | w | m | m |
| e | g | w | g | m |
| e | g | w | e | g |
| e | g | m | w | m |
| e | g | m | m | m |
| e | g | m | g | g |
| e | g | m | e | g |
| e | g | g | w | m |
| e | g | g | m | g |
| e | g | g | g | g |
| e | g | g | e | g |
| e | g | e | w | g |
| e | g | e | m | g |
| e | g | e | g | e |
| e | g | e | e | e |
| e | e | w | w | w |
| e | e | w | m | m |
| e | e | w | g | g |

|   |   |   |   |   |
|---|---|---|---|---|
| e | e | w | e | g |
| e | e | m | w | m |
| e | e | m | m | m |
| e | e | m | g | g |
| e | e | m | e | g |
| e | e | g | w | g |
| e | e | g | m | g |
| e | e | g | g | g |
| e | e | g | e | e |
| e | e | e | w | g |
| e | e | e | m | g |
| e | e | e | g | e |
| e | e | e | e | e |
|   |   |   |   |   |

| Supplementary Table S22: a total of 52 rule bases were established and decisions were made on their consequences |                         |                       |     |       |
|------------------------------------------------------------------------------------------------------------------|-------------------------|-----------------------|-----|-------|
| Degree Impact (DI)                                                                                               | betweenness Impact (BI) | Closeness Impact (CI) | FDR | FINAL |
| D                                                                                                                | D                       | D                     | D   | D     |
| D                                                                                                                | D                       | D                     | C   | D     |
| D                                                                                                                | D                       | D                     | B   | C     |
| D                                                                                                                | D                       | D                     | A   | B     |
| D                                                                                                                | D                       | C                     | D   | D     |
| D                                                                                                                | D                       | B                     | D   | C     |
| D                                                                                                                | D                       | B                     | B   | C     |
| D                                                                                                                | D                       | A                     | D   | B     |
| D                                                                                                                | D                       | A                     | A   | A     |
| D                                                                                                                | B                       | D                     | D   | C     |
| D                                                                                                                | B                       | D                     | B   | C     |
| D                                                                                                                | B                       | B                     | D   | C     |
| D                                                                                                                | B                       | B                     | B   | B     |
| D                                                                                                                | A                       | D                     | D   | B     |
| D                                                                                                                | A                       | D                     | A   | A     |
| D                                                                                                                | A                       | A                     | D   | A     |
| D                                                                                                                | A                       | A                     | A   | A     |
| C                                                                                                                | D                       | D                     | D   | D     |
| C                                                                                                                | D                       | C                     | C   | C     |
| C                                                                                                                | B                       | C                     | C   | C     |
| C                                                                                                                | B                       | B                     | B   | B     |
| C                                                                                                                | A                       | C                     | C   | B     |
| C                                                                                                                | A                       | C                     | A   | A     |
| C                                                                                                                | A                       | A                     | C   | A     |
| C                                                                                                                | A                       | A                     | A   | A     |
| B                                                                                                                | D                       | D                     | D   | C     |
| B                                                                                                                | D                       | D                     | B   | C     |
| B                                                                                                                | D                       | B                     | D   | C     |
| B                                                                                                                | B                       | D                     | D   | C     |
| B                                                                                                                | B                       | D                     | B   | B     |
| B                                                                                                                | B                       | C                     | B   | B     |
| B                                                                                                                | B                       | B                     | D   | B     |
| B                                                                                                                | B                       | B                     | C   | B     |
| B                                                                                                                | B                       | B                     | B   | B     |
| B                                                                                                                | B                       | B                     | A   | B     |
| B                                                                                                                | B                       | A                     | B   | B     |
| B                                                                                                                | A                       | B                     | B   | B     |
| B                                                                                                                | A                       | A                     | A   | A     |

|   |   |   |   |   |
|---|---|---|---|---|
| A | D | D | D | B |
| A | D | D | A | A |
| A | D | A | D | A |
| A | D | A | A | A |
| A | B | B | B | B |
| A | B | A | A | A |
| A | A | D | D | A |
| A | A | D | A | A |
| A | A | C | C | A |
| A | A | C | A | A |
| A | A | A | D | A |
| A | A | A | C | A |
| A | A | A | B | A |
| A | A | A | A | A |
