# Supplementary material for: Construction of an Exudative Age-Related Macular Degeneration Diagnostic and Therapeutic Molecular Network Using Multi-Layer Network Analysis, a Fuzzy Logic Model, and Deep Learning Techniques: Are Retinal and Brain Neurodegenerative Disorders Related?
Source: Pharmaceuticals (Basel). 2023 Nov 2;16(11):1555. doi: 10.3390/ph16111555 (PMC10674956; doi:10.3390/ph16111555)
Supplement: Supplementary file 1 [file pharmaceuticals-16-01555-s001.zip]

Archive with 4 entries (4 files):
- Supplementary Table S15.xlsx
- Supplementary Table S16.xlsx
- Supplementary Table S21.xlsx
- Supplementary Tables.pdf
