# Supplementary material for: Construction of an Exudative Age-Related Macular Degeneration Diagnostic and Therapeutic Molecular Network Using Multi-Layer Network Analysis, a Fuzzy Logic Model, and Deep Learning Techniques: Are Retinal and Brain Neurodegenerative Disorders Related?
Source: Pharmaceuticals (Basel). 2023 Nov 2;16(11):1555. doi: 10.3390/ph16111555 (PMC10674956; doi:10.3390/ph16111555)
Supplement: Supplementary file 1 [file pharmaceuticals-16-01555-s001.zip › Supplementary Table S15.xlsx]

## Sheet: Sheet1
	matched_features
ABC transporters	C01835	Maltotriose	C00047	L-Lysine	C00062	L-Arginine	C00049	L-Aspartic acid	C00025	L-Glutamic acid	C00064	L-Glutamine	C00491	L-Cystine	C00135	L-Histidine	C00183	L-Valine	C00123	L-Leucine	C00407	L-Isoleucine	C00089	Sucrose	C14819	Fe3+	C00038	Zinc cation	C00245	Taurine	C00719	Betaine	C00148	L-Proline	C01181	4-Trimethylammoniobutanoate	C01834	Lipoprotein	C00041	L-Alanine	C00037	Glycine	C00079	L-Phenylalanine	C00065	L-Serine	C00086
Protein digestion and absorption	C00025	L-Glutamic acid	C00049	L-Aspartate	C00037	Glycine	C00041	L-Alanine	C00183	L-Valine	C00123	L-Leucine	C00073	L-Methionine	C00407	L-Isoleucine	C00079	L-Phenylalanine	C00078	L-Tryptophan	C00065	L-Serine	C00064	L-Glutamine	C00062	L-Arginine	C00047	L-Lysine	C00491	L-Cystine	C00135	L-Histidine	C00148	L-Proline	C00097	L-Cysteine	C00082	L-Tyrosine	C00076	Calcium cation	hsa:1277		hsa:1278		hsa:1282		hsa:7373
Central carbon metabolism in cancer	C00022	Pyruvic acid	C00064	L-Glutamine	C00025	L-Glutamic acid	C00186	L-Lactic acid	C00158	Citric acid	C00065	L-Serine	C00037	Glycine	C00097	L-Cysteine	C00123	L-Leucine	C00407	L-Isoleucine	C00079	L-Phenylalanine	C00073	Methionine	C00135	L-Histidine	C00078	L-Tryptophan	C00183	L-Valine	C00082	L-Tyrosine	C00041	L-Alanine	C00049	L-Aspartate	C00148	L-Proline	C00062	L-Arginine
Aminoacyl-tRNA biosynthesis	C00078	L-Tryptophan	C00082	L-Tyrosine	C00123	L-Leucine	C00407	L-Isoleucine	C00047	L-Lysine	C00041	L-Alanine	C00183	L-Valine	C00073	L-Methionine	C00065	L-Serine	C00049	L-Aspartate	C00037	Glycine	C00148	L-Proline	C00097	L-Cysteine	C00025	L-Glutamate	C00064	L-Glutamine	C00062	L-Arginine	C00079	L-Phenylalanine	C00135	L-Histidine
Mineral absorption	C00076	Calcium	C14819	Fe3+	C00038	Zinc (II) ion	C00037	Glycine	C00041	L-Alanine	C00183	L-Valine	C00123	L-Leucine	C00073	L-Methionine	C00407	L-Isoleucine	C00148	L-Proline	C00079	L-Phenylalanine	C00078	L-Tryptophan	C00065	L-Serine	C00064	L-Glutamine
Glyoxylate and dicarboxylate metabolism	C00158	Citric acid	C00058	Formate	C00417	cis-Aconitic acid	C00022	Pyruvic acid	C00037	Glycine	C00065	L-Serine	C00025	L-Glutamic acid	C00064	L-Glutamine	C01732	2-Methylfumarate	C00033	Acetic acid
Taurine and hypotaurine metabolism	C00041	L-Alanine	C00022	Pyruvate	C00519	Hypotaurine	C00097	L-Cysteine	C00245	Taurine	C00033	Acetic acid	C00025	L-Glutamic acid
Cysteine and methionine metabolism	C00065	L-Serine	C00073	L-Methionine	C00021	S-Adenosylhomocysteine	C00097	L-Cysteine	C00051	Glutathione	C00022	Pyruvic acid	C00491	L-Cystine	C00049	L-Aspartate	C00041	L-Alanine
Glycine, serine and threonine metabolism	C00719	Betaine	C00300	Creatine	C00049	L-Aspartic acid	C00097	L-Cysteine	C00037	Glycine	C00065	L-Serine	C00022	Pyruvic acid	C00078	L-Tryptophan
Alanine, aspartate and glutamate metabolism	C00041	L-Alanine	C00049	L-Aspartate	C00022	Pyruvic acid	C00025	L-Glutamic acid	C00064	L-Glutamine	C00158	Citric acid
Ferroptosis	C00025	L-Glutamic acid	C00491	L-Cystine	C00051	Glutathione	C00097	L-Cysteine	C14819	Fe3+	C00219	Arachidonic acid
Sulfur metabolism	C11142	Dimethyl sulfone	C00097	L-Cysteine	C00033	Acetic acid	C00065	L-Serine	C00245	Taurine
Arginine biosynthesis	C00062	L-Arginine	C00049	L-Aspartate	C00064	L-Glutamine	C00086	Urea	C00025	L-Glutamic acid
Amoebiasis	hsa:2335		C00076	Calcium cation	C00219	Arachidonic acid	hsa:1277		hsa1278		hsa1282		C00062	L-Arginine
Valine, leucine and isoleucine biosynthesis	C00022	Pyruvic acid	C00407	L-Isoleucine	C00183	L-Valine	C00123	L-Leucine
Sphingolipid metabolism	C00836	Sphinganine	C12144	Phytosphingosine	C00065	L-Serine	C00319	Sphingosine	C00550	SM(d18:1/18:0)
Phenylalanine metabolism	C00022	Pyruvic acid	C03519	N-Acetyl-L-phenylalanine	C00079	L-Phenylalanine	C00642	p-Hydroxyphenylacetic acid	C00082	L-Tyrosine
Purine metabolism	C00064	L-Glutamine	C00212	Adenosine	C00147	Adenine	C00294	Inosine	C00262	Hypoxanthine	C00086	Urea	C00037	Glycine	C00242	Guanine
Thiamine metabolism	C00082	L-Tyrosine	C00097	L-Cysteine	C00037	Glycine	C00022	Pyruvic acid
Pantothenate and CoA biosynthesis	C00022	Pyruvic acid	C00183	L-Valine	C00097	L-Cysteine	C00049	L-Aspartic acid
Arginine and proline metabolism	C00062	L-Arginine	C00300	Creatine	C00086	Urea	C00025	L-Glutamic acid	C00022	Pyruvic acid	C00148	L-Proline
Staphylococcus aureus infection	hsa:716		hsa5340		hsa1667		has:1670		hsa728358
Gap junction	C00681	1-Acyl-sn-glycerol 3-phosphate	C00076	Calcium cation	C00780	Serotonin	C00025	L-Glutamic acid	hsa5154
Neuroactive ligand-receptor interaction	hsa:5340		C04598	2-Acetyl-1-alkyl-sn-glycero-3-phosphocholine	C00735	Cortisol	C00245	Taurine	C00037	Glycine	C00049	L-Aspartic acid	C00025	L-Glutamic acid	C00681	1-Acyl-sn-glycerol 3-phosphate	C00212	Adenosine	C00780	Serotonin
Primary bile acid biosynthesis	C00187	Cholesterol	C00037	Glycine	C00245	Taurine	C01921	Glycocholic acid
AGE-RAGE signaling pathway in diabetic complications	hsa:1277		hsa1278		hsa1282		C00076	Calcium	hsa2335
Tyrosine metabolism	C00164	Acetoacetic acid	C00642	4-Hydroxyphenylacetate	C00022	Pyruvic acid	C00082	L-Tyrosine	C00822	Dopaquinone
Butanoate metabolism	C00022	Pyruvic acid	C00164	Acetoacetate	C01089	3R-hydroxy-butanoic acid	C00025	L-Glutamic acid
Pyruvate metabolism	C00058	Formic acid	C00033	Acetate	C00186	L-Lactic acid	C00022	Pyruvic acid
Taste transduction	C00076	Calcium	C00089	Sucrose	C00780	Serotonin	C00025	L-Glutamic acid	C00158	Citric acid
Nitrogen metabolism	C00058	Formic acid	C00064	L-Glutamine	C00025	L-Glutamic acid
Carbohydrate digestion and absorption	C00089	Sucrose	C01835	Maltotriose	C00076	Calcium	C00033	Acetic acid
Phenylalanine, tyrosine and tryptophan biosynthesis	C00079	L-Phenylalanine	C00078	L-Tryptophan	C00082	L-Tyrosine
