# Supplementary material for: Construction of an Exudative Age-Related Macular Degeneration Diagnostic and Therapeutic Molecular Network Using Multi-Layer Network Analysis, a Fuzzy Logic Model, and Deep Learning Techniques: Are Retinal and Brain Neurodegenerative Disorders Related?
Source: Pharmaceuticals (Basel). 2023 Nov 2;16(11):1555. doi: 10.3390/ph16111555 (PMC10674956; doi:10.3390/ph16111555)
Supplement: Supplementary file 1 [file pharmaceuticals-16-01555-s001.zip › Supplementary Table S21.xlsx]

## Sheet: Sheet1
	Maltotriose	L-Glutamic acid	Pyruvic acid	L-Tryptophan	Calcium	Citric acid	L-Alanine	L-Serine	Betaine	Dimethyl sulfone	L-Arginine	Sphinganine	L-Glutamine	L-Tyrosine	Cholesterol	Acetoacetic acid	Formic acid	Sucrose	L-Phenylalanine	L-Cysteine	L-Aspartate	L-Methionine	Creatine	L-Cystine	L-Lysine	L-Isoleucine	Phytosphingosine	Adenosine	L-Valine	Glycine	L-Leucine	Zinc (II) ion	cis-Aconitic acid	Hypotaurine	S-Adenosylhomocysteine	L-Aspartic acid	Glutathione	Acetic acid	Arachidonic acid	Adenine	Urea	Serotonin	Cortisol	Taurine	L-Lactic acid	p-Hydroxyphenylacetic acid	Inosine	SM(d18:1/18:0)	Hypoxanthine
ABC transporters	12.3302	42.4297	0	0	0	0	87.3283	62.5	42.6383	0	89.3562	0	62.5	0	0	0	0	12.9069	62.5	0	0	0	0	62.5	90.3333	44.41	0	37.5	62.5	90.3333	62.5	37.5	0	0	0	37.5	62.5	0	0	0	42.4297	0	0	62.5	0	0	37.5	0	0
Protein digestion and absorption	0	42.4297	0	62.5	90.3333	0	87.3283	62.5	0	0	89.3562	0	62.5	42.4297	0	0	0	0	62.5	62.5	13.8205	86.5644	0	62.5	90.3333	44.41	0	0	62.5	90.3333	62.5	0	0	0	0	0	0	0	0	0	0	0	0	0	0	0	0	0	0
Central carbon metabolism in cancer	0	42.4297	88.0631	62.5	0	90.3333	87.3283	62.5	0	0	89.3562	0	62.5	42.4297	0	0	0	0	62.5	62.5	13.8205	86.5644	0	0	0	44.41	0	0	62.5	90.3333	62.5	0	0	0	0	0	0	0	0	0	0	0	0	0	89.4429	0	0	0	0
Aminoacyl-tRNA biosynthesis	0	42.4297	0	62.5	0	0	87.3283	62.5	0	0	89.3562	0	62.5	42.4297	0	0	0	0	62.5	62.5	13.8205	86.5644	0	0	90.3333	44.41	0	0	62.5	90.3333	62.5	0	0	0	0	0	0	0	0	0	0	0	0	0	0	0	0	0	0
Mineral absorption	0	0	0	62.5	90.3333	0	87.3283	62.5	0	0	0	0	62.5	0	0	0	0	0	62.5	0	0	86.5644	0	0	0	44.41	0	0	62.5	90.3333	62.5	37.5	0	0	0	0	0	0	0	0	0	0	0	0	0	0	0	0	0
Glyoxylate and dicarboxylate metabolism	0	42.4297	88.0631	0	0	90.3333	0	62.5	0	0	0	0	62.5	0	0	0	0	0	0	0	0	0	0	0	0	0	0	0	0	90.3333	0	0	37.5	0	0	0	0	37.5	0	0	0	0	0	0	0	0	0	0	0
Taurine and hypotaurine metabolism	0	42.4297	0	0	0	0	87.3283	0	0	0	0	0	0	0	0	0	0	0	0	62.5	0	0	0	0	0	0	0	0	0	0	0	0	0	13.0896	0	0	0	37.5	0	0	0	0	0	62.5	0	0	0	0	0
Cysteine and methionine metabolism	0	0	88.0631	0	0	0	87.3283	62.5	0	0	0	0	0	0	0	0	0	0	0	62.5	13.8205	86.5644	0	62.5	0	0	0	0	0	0	0	0	0	0	37.5	0	62.5	0	0	0	0	0	0	0	0	0	0	0	0
Glycine, serine and threonine metabolism	0	0	88.0631	62.5	0	0	0	62.5	42.6383	0	0	0	0	0	0	0	0	0	0	62.5	0	0	42.4297	0	0	0	0	0	0	90.3333	0	0	0	0	0	37.5	0	0	0	0	0	0	0	0	0	0	0	0	0
Alanine, aspartate and glutamate metabolism	0	42.4297	88.0631	0	0	90.3333	87.3283	0	0	0	0	0	62.5	0	0	0	0	0	0	0	13.8205	0	0	0	0	0	0	0	0	0	0	0	0	0	0	0	0	0	0	0	0	0	0	0	0	0	0	0	0
Ferroptosis	0	42.4297	0	0	0	0	0	0	0	0	0	0	0	0	0	0	0	0	0	62.5	0	0	0	62.5	0	0	0	0	0	0	0	0	0	0	0	0	62.5	0	37.5	0	0	0	0	0	0	0	0	0	0
Sulfur metabolism	0	0	0	0	0	0	0	62.5	0	11.6246	0	0	0	0	0	0	0	0	0	62.5	0	0	0	0	0	0	0	0	0	0	0	0	0	0	0	0	0	37.5	0	0	0	0	0	62.5	0	0	0	0	0
Arginine biosynthesis	0	42.4297	0	0	0	0	0	0	0	0	89.3562	0	62.5	0	0	0	0	0	0	0	13.8205	0	0	0	0	0	0	0	0	0	0	0	0	0	0	0	0	0	0	0	42.4297	0	0	0	0	0	0	0	0
Amoebiasis	0	0	0	0	90.3333	0	0	0	0	0	89.3562	0	0	0	0	0	0	0	0	0	0	0	0	0	0	0	0	0	0	0	0	0	0	0	0	0	0	0	37.5	0	0	0	0	0	0	0	0	0	0
Valine, leucine and isoleucine biosynthesis	0	0	88.0631	0	0	0	0	0	0	0	0	0	0	0	0	0	0	0	0	0	0	0	0	0	0	44.41	0	0	62.5	0	62.5	0	0	0	0	0	0	0	0	0	0	0	0	0	0	0	0	0	0
Sphingolipid metabolism	0	0	0	0	0	0	0	62.5	0	0	0	11.6569	0	0	0	0	0	0	0	0	0	0	0	0	0	0	13.6154	0	0	0	0	0	0	0	0	0	0	0	0	0	0	0	0	0	0	0	0	13.8205	0
Phenylalanine metabolism	0	0	88.0631	0	0	0	0	0	0	0	0	0	0	42.4297	0	0	0	0	62.5	0	0	0	0	0	0	0	0	0	0	0	0	0	0	0	0	0	0	0	0	0	0	0	0	0	0	37.5	0	0	0
Purine metabolism	0	0	0	0	0	0	0	0	0	0	0	0	62.5	0	0	0	0	0	0	0	0	0	0	0	0	0	0	37.5	0	90.3333	0	0	0	0	0	0	0	0	0	11.4955	42.4297	0	0	0	0	0	37.5	0	62.5
Thiamine metabolism	0	0	88.0631	0	0	0	0	0	0	0	0	0	0	42.4297	0	0	0	0	0	62.5	0	0	0	0	0	0	0	0	0	90.3333	0	0	0	0	0	0	0	0	0	0	0	0	0	0	0	0	0	0	0
Pantothenate and CoA biosynthesis	0	0	88.0631	0	0	0	0	0	0	0	0	0	0	0	0	0	0	0	0	62.5	0	0	0	0	0	0	0	0	62.5	0	0	0	0	0	0	37.5	0	0	0	0	0	0	0	0	0	0	0	0	0
Arginine and proline metabolism	0	42.4297	88.0631	0	0	0	0	0	0	0	89.3562	0	0	0	0	0	0	0	0	0	0	0	42.4297	0	0	0	0	0	0	0	0	0	0	0	0	0	0	0	0	0	42.4297	0	0	0	0	0	0	0	0
Staphylococcus aureus infection	0	0	0	0	0	0	0	0	0	0	0	0	0	0	0	0	0	0	0	0	0	0	0	0	0	0	0	0	0	0	0	0	0	0	0	0	0	0	0	0	0	0	0	0	0	0	0	0	0
Gap junction	0	42.4297	0	0	90.3333	0	0	0	0	0	0	0	0	0	0	0	0	0	0	0	0	0	0	0	0	0	0	0	0	0	0	0	0	0	0	0	0	0	0	0	0	54.8749	0	0	0	0	0	0	0
Neuroactive ligand-receptor interaction	0	42.4297	0	0	0	0	0	0	0	0	0	0	0	0	0	0	0	0	0	0	0	0	0	0	0	0	0	37.5	0	90.3333	0	0	0	0	0	37.5	0	0	0	0	0	54.8749	90.3333	62.5	0	0	0	0	0
Primary bile acid biosynthesis	0	0	0	0	0	0	0	0	0	0	0	0	0	0	90.2553	0	0	0	0	0	0	0	0	0	0	0	0	0	0	90.3333	0	0	0	0	0	0	0	0	0	0	0	0	0	62.5	0	0	0	0	0
AGE-RAGE signaling pathway in diabetic complications	0	0	0	0	90.3333	0	0	0	0	0	0	0	0	0	0	0	0	0	0	0	0	0	0	0	0	0	0	0	0	0	0	0	0	0	0	0	0	0	0	0	0	0	0	0	0	0	0	0	0
Tyrosine metabolism	0	0	88.0631	0	0	0	0	0	0	0	0	0	0	42.4297	0	62.5	0	0	0	0	0	0	0	0	0	0	0	0	0	0	0	0	0	0	0	0	0	0	0	0	0	0	0	0	0	0	0	0	0
Butanoate metabolism	0	42.4297	88.0631	0	0	0	0	0	0	0	0	0	0	0	0	0	0	0	0	0	0	0	0	0	0	0	0	0	0	0	0	0	0	0	0	0	0	0	0	0	0	0	0	0	0	0	0	0	0
Pyruvate metabolism	0	0	88.0631	0	0	0	0	0	0	0	0	0	0	0	0	0	11.4106	0	0	0	0	0	0	0	0	0	0	0	0	0	0	0	0	0	0	0	0	0	0	0	0	0	0	0	89.4429	0	0	0	0
Taste transduction	0	42.4297	0	0	90.3333	90.3333	0	0	0	0	0	0	0	0	0	0	0	12.9069	0	0	0	0	0	0	0	0	0	0	0	0	0	0	0	0	0	0	0	0	0	0	0	54.8749	0	0	0	0	0	0	0
Nitrogen metabolism	0	42.4297	0	0	0	0	0	0	0	0	0	0	62.5	0	0	0	11.4106	0	0	0	0	0	0	0	0	0	0	0	0	0	0	0	0	0	0	0	0	0	0	0	0	0	0	0	0	0	0	0	0
Carbohydrate digestion and absorption	12.3302	0	0	0	90.3333	0	0	0	0	0	0	0	0	0	0	0	0	12.9069	0	0	0	0	0	0	0	0	0	0	0	0	0	0	0	0	0	0	0	37.5	0	0	0	0	0	0	0	0	0	0	0
Phenylalanine, tyrosine and tryptophan biosynthesis	0	0	0	62.5	0	0	0	0	0	0	0	0	0	42.4297	0	0	0	0	62.5	0	0	0	0	0	0	0	0	0	0	0	0	0	0	0	0	0	0	0	0	0	0	0	0	0	0	0	0	0	0
[truncated: 10 more columns]
